# Supplementary material
Source: PubMed Central journal article supplement (PMC2934747)

# PROTEOMICS

## Supporting Information for Proteomics

**DOI 10.1002/pmic.201000039**

Rebekah L. Gundry, Irina Tchernyshyov, Shijun Sheng,  
Yelena Tarasova, Kimberly Raginski, Kenneth R. Boheler  
and Jennifer E. Van Eyk

**Expanding the mouse embryonic stem cell proteome: Combining three  
proteomic approaches**

## Supplementary Data – Table of Contents

### Detailed Methods

Table s1 – Pluripotency Network Proteins

Table s2 – Proteins identified in the current study

Table s3 – Peptides identified in the current study. All details for each peptide can be found in the PRIDE database

Figure s1 – 1DE gel images

Figure s2 – Sequence coverage comparison among three proteomic methods

## **Detailed Methods**

### **2DLC**

For the two dimensional liquid chromatography (2DLC), analysis was carried out on a 2-Dimensional Liquid Chromatography system (ProteomeLab PF 2D, Beckman Coulter, CA, USA) in which intact proteins were initially separated in the first dimension by chromatographic focusing (based on pI) followed by a second dimension using reversed phase (based on hydrophobicity) as previously reported [1]. R1 cells ( $7 \times 10^9$  cells) were lysed in 5M urea, 2M thiourea, 10% glycerol, 2% n-octylglucoside, 5mM TCEP and 1mM protease inhibitors (Sigma), centrifuged at  $20000 \times g$  for 60 at room temperature and then the buffer was exchanged using PD-10 gel filtration column. Protein concentration was determined using the BCA assay (ThermoFisherPierce). 2.5 mg of protein solution was injected onto the PF 2D consisting of a single piston pump (HPCF Module) with pH monitoring and UV detection at 280 nm. First dimensions fractions were collected every 8.5 minutes until the pH gradient portion of the run, when fractions were collected at 0.3-pH intervals between pH 8.3 and 4.0, followed by a high salt wash comprising 1M NaCl in 30% n-Propanol. The 30 first dimension fractions were sequentially injected (250ul) into the 2<sup>nd</sup> dimension reverse-phase system consisting a binary pump system (HPRP Module) with a column heater at 55°C, UV detection at 214 nm, and a fraction collector. Each analysis used a 3.33% B/min linear gradient in which solvent A was 0.1% aqueous TFA and solvent B was 0.08% TFA in acetonitrile at a flow rate of 0.75 ml/min. Second dimension fractions were concentrated to dryness using a vacuum concentrator. 5–10  $\mu$ l. 1 M  $\text{NH}_4\text{HCO}_3$  was added to the residue to neutralize samples to pH 8.0 and samples were digested with sequencing-grade modified trypsin (Promega, WI)(enzyme-to-substrate ratio of 1:50) overnight at 37°C. 10% TFA was then added to stop the digestion.

### ***Subcellular enrichment and 1DE***

For one dimensional gel electrophoresis (1DE), R1 cell ( $\sim 7 \times 10^9$  cells) were solubilized in lysis buffer consisting of 10mM Tris pH7.5, 0.5mM MgCl, protease inhibitor cocktail (Roche Applied Science)). Cell lysate was centrifuged at 800 x g for 10 min at 4°C twice. The supernatant was collected and pooled. The resulting pellets from both centrifugations were combined, resuspended in lysis buffer, homogenized, and centrifuged as above. The pellet consisting primarily of the nucleus was stored for 1DE. The supernatant was collected and combined with previous supernatant pool and further separated into crude mitochondrial pellet and cytoplasmic fraction by centrifugation at 7000 x g for 15 min at 4°C. The supernatant was further fractionated into soluble cytoplasmic proteins and other cellular membrane proteins by centrifugation at 18000 x g for 2 hours at 4°C. In preparation for 1DE, each subproteome fraction (Nuclear enriched, mitochondrial enriched, cytoplasmic/soluble, membrane enriched) was resuspended in incomplete Laemmli buffer (4%SDS, 10% glycerol, 100mM Tris pH 7.0), sonicated and incubated at 100°C for 10min. Protein concentration for each subproteome was determined using the BCA protein quantification kit (Thermo Scientific Pierce). 300 ug lysate from each fraction were separated on 4–12% NuPAGE Bis-Tris mini gel (Invitrogen) and visualized with colloidal Coomassie Blue G-250 stain (Thermo Scientific Pierce) according to [2]. Gel images are shown in supplemental data (Figure s1). Each gel line was cut into 5 slices and slices from identical gel areas were combined. The in-gel digestion was carried out according to Shevchenko [3] with minor modifications and peptide samples were desalted on a C<sub>18</sub> UltraMicroSpin™ column (Nest Group, Southborough, MA) according to the manufacturer's instructions.

### ***Unfractionated (UF) samples***

For the unfractionated (UF) samples, R1 cells ( $\sim 160 \times 10^6$ ) were resuspended in cold lysis buffer (4°C) and homogenized. RapiGest (Waters, Milford, MA) was added to a final concentration of 0.5% (v/v) and the sample was incubated 15 min at 60°C.

Subsequently, the sample was diluted with 100 mM ammonium bicarbonate to 0.2% RapiGest, reduced with 10 mM Tris(2-carboxyethyl)phosphine (Sigma) at 25°C for 20 min, then alkylated for 20 min with 10mM iodoacetamide (Sigma) at 25°C in the dark. Proteins were digested with 1 µg of glycerol-free endoproteinase Lys-C (Calbiochem) at 37°C for 4 h followed by 20 µg of sequencing grade trypsin (Promega, Madison, WI) at 37°C for 16 h. The resulting peptide mixture was desalted and concentrated using a C<sub>18</sub> UltraMicroSpin™ column.

### ***Data acquisition on the LTQ-Orbitrap***

Peptides from the 1DE and UF samples were separated on a C<sub>18</sub> RP-HPLC column (75 µm x 10 cm self-packed with 5 µm, 200 Å Magic C18; Michrom BioResources, Auburn, CA) at a flow rate of 300 nl / min where mobile phase A was 0.1% v/v formic acid in water and mobile phase B was 90% acetonitrile, 0.1 % formic acid in water. The linear gradient was 10% B to 65% B in 120 minutes and 60 minutes, respectively, for the UF and 1DE samples. Each MS1 scan followed by collision induced dissociation (CID, acquired in the LTQ part) of the seven most abundant precursor ions with dynamic exclusion for 30 seconds. Only MS1 signals exceeding 10,000 counts triggered the MS2 scans. For MS1,  $2 \times 10^5$  ions were accumulated in the Orbitrap over a maximum time of 500 ms and scanned at a resolution of 60,000 FWHM (at 400 m/z). MS2 spectra (via collision induced dissociation (CID)) were acquired in normal scan mode in the LTQ, a

target setting of  $10^4$  ions and accumulation time of 30 ms. The normalized collision energy was set to 35%, and one microscan was acquired for each spectrum.

### ***Data acquisition on the LTQ***

Peptides from the 2DLC were separated on a  $75\mu\text{m} \times 10\text{cm}$  BioBasic C18 column (New Objective, MA) using a Agilent 1100 nano-LC system (Agilent, CA) connected to an LTQ mass spectrometer (Thermo). The samples were loaded in buffer A consisting of 0.1% formic acid in 4% acetonitrile in water and eluted at a flow rate of 300 nl/min using a linear A/B gradient (5–60% B/ 30 or 60 minutes, depending on sample complexity) where buffer B consisted of 0.1 % formic acid in 90% acetonitrile/water. The mass spectrometer was operated in the data-dependent mode, in which every MS scan (survey 350–2000 Da) was followed by MS/MS scans of the five most abundant ions.

### ***Protein database search parameters***

All raw data peak extraction was performed using Sorcerer 2™-SEQUEST® default settings. Database search parameters included the following: full enzyme digest using trypsin (After KR/-) with up to 2 missed cleavages, monoisotopic precursor mass range of 400 to 4500 amu, and oxidation was allowed as a differential modification. For the 1DE and whole cell lysates data, carbamidomethylation was an allowed modification. Peptide mass tolerance was set to 1.2 Da for LTQ data, and was set to 50 ppm for LTQ-Orbitrap data. Fragment mass type set was to monoisotopic, maximum number of modifications set to 4 per peptide. Advanced search options that were enabled included: XCorr score cutoff of 1.5, isotope check using mass shift of 1.003355 amu, keep the top 2000 preliminary results for final scoring, display up to 200 peptide results in the result file, display up to 5 full protein descriptions in the result file, display up to 1 duplicate protein references in the result file.

## References

- [1] Sheng, S., Chen, D., Van Eyk, J. E., Multidimensional liquid chromatography separation of intact proteins by chromatographic focusing and reversed phase of the human serum proteome: optimization and protein database. *Mol Cell Proteomics* 2006, 5, 26-34.
- [2] Candiano, G., Bruschi, M., Musante, L., Santucci, L., *et al.*, Blue silver: a very sensitive colloidal Coomassie G-250 staining for proteome analysis. *Electrophoresis* 2004, 25, 1327-1333.
- [3] Shevchenko, A., Wilm, M., Vorm, O., Mann, M., Mass spectrometric sequencing of proteins silver-stained polyacrylamide gels. *Anal Chem* 1996, 68, 850-858.

**Table s1. Pluripotency Network Proteins.** All proteins identified in the current study which have been experimentally linked to the pluripotency network in human and/or mouse ES cells (cite), are markers of pluripotency, or are part of the protein-protein network shared by pluripotent cells (PluriNet, [7]). Listed are the Uniprot accession number, gene, protein name, role and corresponding citation, and by which method it was identified in the current study.

| Uniprot  | Gene      | Protein                                                       | Role (citation)                                                                                                | 2DLC | 1DE | UF |
|----------|-----------|---------------------------------------------------------------|----------------------------------------------------------------------------------------------------------------|------|-----|----|
| Q8CJF7   | Ahctf1    | Protein ELYS                                                  | interacts with Rex1, Nanog; pluripotency transcriptional network, protein interaction network (1,2)            |      |     | X  |
| O35381   | Anp32a    | Acidic leucine-rich nuclear phosphoprotein 32 family member A | PluriNet (5)                                                                                                   |      | X   | X  |
| P07356   | Anxa2     | Annexin A2                                                    | PluriNet (5)                                                                                                   | X    |     | X  |
| P28352   | Apex1     | DNA-(apurinic or apyrimidinic site) lyase                     | PluriNet (5)                                                                                                   | X    | X   | X  |
| Q8C6C1   | Aurkb     | aurora kinase B                                               | PluriNet (5)                                                                                                   | X    |     |    |
| O54825   | Bysl      | Bystin                                                        | PluriNet (5)                                                                                                   | X    |     |    |
| P24860   | Ccnb1     | G2/mitotic-specific cyclin-B1                                 | PluriNet (5)                                                                                                   |      |     | X  |
| P11440   | Cdc2a     | Cell division control protein 2 homolog                       | interacts with Myc; pluripotency transcriptional network (1)                                                   | X    | X   | X  |
| O88545   | Cops6     | COP9 signalosome complex subunit 6                            | PluriNet (5)                                                                                                   |      |     | X  |
| P56546-2 | Ctbp2     | C-terminal-binding protein 2                                  | PluriNet (5)                                                                                                   | X    | X   | X  |
| Q3UGB5   | Dazap1    | DAZ associated protein 1                                      | PluriNet (5)                                                                                                   | X    |     |    |
| P00375   | Dhfr      | Dihydrofolate reductase                                       | PluriNet (5)                                                                                                   |      | X   |    |
| Q8C9B9   | Dido1     | Isoform 1 of Death-inducer obliterator 1                      | target of multiple pluripotency txn factors (4)                                                                | X    |     |    |
|          | Dpf2      | Requiem                                                       | interacts with Rex1,Oct4; pluripotency protein interaction network (2)                                         | X    |     |    |
| Q9CQS7   | Dppa5a    | Developmental pluripotency-associated protein 5A              | marker of pluripotency (6)                                                                                     | X    | X   |    |
| Q80Y81   | Elac2     | Zinc phosphodiesterase ELAC protein 2                         | PluriNet (5)                                                                                                   | X    |     | X  |
| Q8R0W0   | Eppk1     | Epiplakin                                                     | PluriNet (5)                                                                                                   |      | X   | X  |
| Q71FD7   | Fblim1    | Filamin-binding LIM protein 1                                 | interacts with Zfp281 (3)                                                                                      | X    |     | X  |
| Q8C5X6   | Fen1      | Putative uncharacterized protein                              | PluriNet (5)                                                                                                   | X    |     |    |
| Q3UUU2   | Fubp1     | Putative uncharacterized protein                              | PluriNet (5)                                                                                                   | X    | X   | X  |
| Q3TIX6   | Fubp3     | far upstream element (FUSE) binding protein 3                 | target of multiple pluripotency txn factors (4)                                                                | X    | X   | X  |
| P56959   | Fus       | RNA-binding protein FUS                                       | PluriNet (5)                                                                                                   | X    | X   | X  |
|          | Gatad2a   | Transcriptional repressor p66 alpha                           | interacts with Nac1; pluripotency protein interaction network (2)                                              | X    |     |    |
| Q3THK7   | Gmps      | GMP synthase [glutamine-hydrolyzing]                          | PluriNet (5)                                                                                                   |      | X   | X  |
| P05202   | Got2      | Aspartate aminotransferase, mitochondrial                     | PluriNet (5)                                                                                                   |      | X   | X  |
| O09106   | Hdac1     | Histone deacetylase 1                                         | PluriNet (5)                                                                                                   | X    |     | X  |
| B2RRP3   | Hdac2     | histone deacetylase 2                                         | interacts with Oct4,Nanog; pluripotency transcriptional network, protein interaction network, PluriNet (1,2,5) | X    |     |    |
| O08528   | Hk2       | Hexokinase-2                                                  | interacts with Zfp281 (3)                                                                                      |      | X   | X  |
| P17095   | Hmga1-rs1 | Isoform HMG-I of High mobility group protein HMG-I/HMG-Y      | PluriNet (5)                                                                                                   |      |     | X  |



|          |          |                                                                             |                                                             |   |   |   |
|----------|----------|-----------------------------------------------------------------------------|-------------------------------------------------------------|---|---|---|
|          | Hnrpd    | heterogeneous nuclear ribonucleoprotein D-like                              | target of multiple pluripotency txn factors (4)             | X | X | X |
| P00493   | Hprt1    | Hypoxanthine-guanine phosphoribosyltransferase                              | PluriNet (5)                                                | X | X | X |
| Q71LX8   | Hsp90ab1 | MCG18238                                                                    | PluriNet (5)                                                | X | X | X |
| Q99M31-2 | Hspa14   | Heat shock 70 kDa protein 14                                                | PluriNet (5)                                                |   |   | X |
| P63017   | Hspa8    | Heat shock cognate 71 kDa protein                                           | PluriNet (5)                                                | X | X | X |
| Q7TSZ0   | Hspa9    | heat shock protein 9                                                        | PluriNet (5)                                                | X | X | X |
| P63038   | Hspd1    | Isoform 1 of 60 kDa heat shock protein, mitochondrial                       | PluriNet (5)                                                | X | X | X |
| Q64433   | Hspe1    | 10 kDa heat shock protein, mitochondrial Isoform HSP105-alpha of Heat shock | PluriNet (5)                                                | X | X | X |
| Q61699   | Hsph1    | protein 105 kDa                                                             | PluriNet (5)                                                | X | X | X |
| Q62315   | Jarid2   | Protein Jumonji                                                             | target of multiple pluripotency txn factors (4)             | X |   | X |
| P70168   | Kpnb1    | Importin subunit beta-1                                                     | PluriNet (5)                                                |   | X | X |
| Q8VC85   | Lsm1     | U6 snRNA-associated Sm-like protein LSm1                                    | PluriNet (5)                                                | X |   |   |
| P62313   | Lsm6     | U6 snRNA-associated Sm-like protein LSm6                                    | PluriNet (5)                                                |   | X |   |
| Q3UJN1   | Mcm2     | Putative uncharacterized protein                                            | PluriNet (5)                                                | X | X | X |
| P25206   | Mcm3     | DNA replication licensing factor MCM3                                       | PluriNet (5)                                                | X | X | X |
| P49717   | Mcm4     | DNA replication licensing factor MCM4 minichromosome maintenance deficient  | PluriNet (5)                                                | X | X | X |
| Q52KC3   | Mcm5     | 5, cell division cycle 46                                                   | PluriNet (5)                                                | X | X | X |
| P97311   | Mcm6     | DNA replication licensing factor MCM6                                       | PluriNet (5)                                                | X | X | X |
| P51949   | Mnat1    | CDK-activating kinase assembly factor MAT1                                  | PluriNet (5)                                                | X |   |   |
| P43247   | Msh2     | DNA mismatch repair protein Msh2                                            | PluriNet (5)                                                |   | X | X |
| Q6GTK8   | Msh6     | mutS homolog 6                                                              | target of multiple pluripotency txn factors, PluriNet (4,5) |   | X | X |
| Q922D8   | Mthfd1   | C-1-tetrahydrofolate synthase, cytoplasmic                                  | PluriNet (5)                                                |   | X | X |
| Q7TPV4   | Mybbp1a  | Myb-binding protein 1A                                                      | PluriNet (2,5)                                              |   | X | X |
| P09405   | Ncl      | Nucleolin                                                                   | PluriNet (5)                                                | X | X | X |
| Q9WV70   | Noc2l    | Nucleolar complex protein 2 homolog                                         | PluriNet (5)                                                |   | X | X |
|          | Nolc1    | Nucleolar and coiled-body phosphoprotein 1                                  | PluriNet (5)                                                |   | X | X |
| Q6DFW4   | Nop58    | Nucleolar protein 58                                                        | PluriNet (5)                                                | X | X | X |
| Q61937   | Npm1     | Nucleophosmin                                                               | PluriNet (5)                                                |   | X | X |
| Q80WR0   | Nup153   | Nucleoporin 153                                                             | PluriNet (5)                                                | X |   | X |
| Q9JIH2   | Nup50    | Nucleoporin 50 kDa                                                          | PluriNet (5)                                                | X |   |   |
| P50580   | Pa2g4    | Proliferation-associated protein 2G4                                        | PluriNet (5)                                                | X | X | X |
| O88643   | Pak1     | Serine/threonine-protein kinase PAK 1                                       | PluriNet (5)                                                | X |   |   |
| Q3TF18   | Parp1    | Putative uncharacterized protein                                            | PluriNet (5)                                                | X | X | X |
| P17918   | Pcna     | Proliferating cell nuclear antigen                                          | PluriNet (5)                                                |   | X | X |
| Q9DBD5   | Pelp1    | Proline-, glutamic acid- and leucine-rich protein 1                         | PluriNet (5)                                                |   | X | X |
| P62962   | Pfn1     | Profilin-1                                                                  | PluriNet (5)                                                | X | X | X |
| Q3TUQ5   | Pnn      | pinin                                                                       | PluriNet (5)                                                |   | X |   |

|          |         |                                                                                       |                                                                                                                       |   |   |   |
|----------|---------|---------------------------------------------------------------------------------------|-----------------------------------------------------------------------------------------------------------------------|---|---|---|
| Q8K205   | Pop1    | Processing of 1, ribonuclease P/MRP family                                            | PluriNet (5)                                                                                                          | X |   |   |
| Q91YU8   | Ppan    | Suppressor of SWI4 1 homolog                                                          | PluriNet (5)                                                                                                          | X |   | X |
| Q9CR16   | Ppid    | 40 kDa peptidyl-prolyl cis-trans isomerase                                            | PluriNet (5)<br>interacts with Zfp281/Rex1;<br>pluripotency transcriptional network,protein interaction network (1,2) | X | X | X |
| Q9JIF0   | Prmt1   | Protein arginine N-methyltransferase 1                                                |                                                                                                                       |   | X | X |
| Q8CIG8   | Prmt5   | Protein arginine N-methyltransferase 5 Isoform 1 of PC4 and SFRS1-interacting protein | PluriNet (5)                                                                                                          |   | X | X |
| Q99JF8   | Psip1   |                                                                                       | PluriNet (5)                                                                                                          | X | X | X |
| O70435   | Psm3    | Proteasome subunit alpha type-3                                                       | PluriNet (5)                                                                                                          |   | X | X |
| Q9QUM9   | Psm6    | Proteasome subunit alpha type-6                                                       | PluriNet (5)                                                                                                          | X | X | X |
| P29351-2 | Ptpn6   | Tyrosine-protein phosphatase non-receptor type 6                                      | PluriNet (5)                                                                                                          | X |   |   |
| Q8VI36   | Pxn     | Paxillin                                                                              | PluriNet (5)                                                                                                          | X |   |   |
| Q9EP71   | Rai14   | Ankyrin                                                                               | interacts with Rex1; pluripotency protein interaction network (2)<br>target of multiple pluripotency txn factors (4)  | X |   |   |
| Q3U3G1   | Rbbp5   | retinoblastoma binding protein 5                                                      |                                                                                                                       |   |   | X |
| Q8C2Q3   | Rbm14   | RNA-binding protein 14                                                                | PluriNet (5)                                                                                                          |   | X |   |
| Q8R323   | Rfc3    | Replication factor C subunit 3                                                        | PluriNet (5)<br>interacts with Nanog,Dax1,<br>pluripotency transcriptional network, protein interaction network (1,2) |   |   | X |
| Q6PR54   | Rif1    | Telomere-associated protein RIF1                                                      |                                                                                                                       |   | X | X |
| Q9CQJ4   | Rnf2    | E3 ubiquitin-protein ligase RING2                                                     |                                                                                                                       | X |   |   |
| Q3UJN2   | Ruvb1   | Putative uncharacterized protein                                                      | PluriNet (5)                                                                                                          | X | X | X |
| Q6P5E3   | Sall1   | sal-like 1                                                                            | interacts with Nanog,Nac1,<br>pluripotency transcriptional network, protein interaction network (1,2)                 |   |   | X |
| Q8BX22   | Sall4   | Isoform 1 of Sal-like protein 4                                                       |                                                                                                                       | X |   | X |
| Q8C671   | Sfrs2   | Putative uncharacterized protein                                                      | PluriNet (1,5)                                                                                                        |   | X | X |
| Q923E4   | Sirt1   | NAD-dependent deacetylase sirtuin-1                                                   | PluriNet (5)                                                                                                          |   |   | X |
| P97496   | Smarcc1 | SWI/SNF complex subunit SMARCC1                                                       | PluriNet (5)                                                                                                          | X | X | X |
| P97801   | Smn1    | Survival motor neuron protein                                                         | PluriNet (5)                                                                                                          |   |   | X |
| Q8BGT7   | Smndc1  | Survival of motor neuron-related-splicing factor 30                                   | PluriNet (5)                                                                                                          | X |   |   |
| Q62189   | Snrpa   | U1 small nuclear ribonucleoprotein A                                                  | PluriNet (5)                                                                                                          | X | X | X |
| P62315   | Snrpd1  | Small nuclear ribonucleoprotein Sm D1                                                 | PluriNet (5)                                                                                                          | X | X |   |
| P62305   | Snrpe   | Small nuclear ribonucleoprotein E                                                     | PluriNet (5)                                                                                                          |   | X | X |
| P63163   | Snrpn   | Small nuclear ribonucleoprotein-associated protein N                                  | PluriNet (5)                                                                                                          | X | X |   |
| Q60I23   | Sox2    | sex-determining region Y-box 2                                                        | Core txn factor (1)                                                                                                   | X |   |   |
| P32067   | Ssb     | Lupus La protein homolog                                                              | PluriNet (5)                                                                                                          | X | X | X |
| Q08943-2 | Ssrp1   | FACT complex subunit SSRP1                                                            | interacts with Zfp281 (3)                                                                                             |   | X | X |
| P54227   | Stmn1   | Stathmin                                                                              | interacts with Zfp281 (3)                                                                                             | X | X | X |

|        |         |                                                        |                                                                                         |   |   |   |
|--------|---------|--------------------------------------------------------|-----------------------------------------------------------------------------------------|---|---|---|
| Q7TMK9 | Syncrip | Isoform 1 of Heterogeneous nuclear ribonucleoprotein Q | PluriNet (5)                                                                            | X | X | X |
| Q8CGF7 | Tcerg1  | Transcription elongation regulator 1                   | PluriNet (5)                                                                            | X |   |   |
|        | Tcf3    | transcription factor E2a                               | interacts with Zfp281 (3)                                                               | X |   |   |
| Q7TPZ2 | Tcof1   | Tcof1 protein (Fragment)                               | PluriNet (5)                                                                            |   |   | X |
| Q3UCI5 | Tmpo    | Thymopoietin                                           | PluriNet (5)                                                                            | X | X | X |
| A2APB8 | Tpx2    | TPX2, microtubule-associated protein homolog           | PluriNet (5)                                                                            | X |   |   |
|        |         |                                                        | interacts with Zpf281; pluripotency transcriptional network; PluriNet (1,5)             |   |   |   |
| Q62318 | Trim28  | Isoform 1 of Transcription intermediary factor 1-beta  |                                                                                         | X | X | X |
| Q6J1H4 | Utf1    | Undifferentiated embryonic cell transcription factor 1 | interacts with Zfp281 (3)                                                               |   | X | X |
| P70460 | Vasp    | Vasodilator-stimulated phosphoprotein                  | PluriNet (5)                                                                            |   |   | X |
|        |         |                                                        | interacts with Myc/Rex1/Nac1; pluripotency transcriptional network, protein interaction |   |   |   |
| Q4VBE8 | Wdr18   | WD repeat-containing protein 18                        | network (1,2)                                                                           |   |   | X |
| Q99J09 | Wdr77   | Methylosome protein 50                                 | PluriNet (5)                                                                            |   |   | X |
| P27641 | Xrcc5   | ATP-dependent DNA helicase 2 subunit 2                 | PluriNet (5)                                                                            |   | X |   |
| Q6IQX8 | Zfp219  | zinc finger protein 219                                | interacts with Oct4; pluripotency transcriptional network (1,2)                         | X |   | X |
|        |         |                                                        | interacts with Nanog, pluripotency transcriptional network, protein interaction         |   |   |   |
| Q99LI5 | Zfp281  | Zinc finger protein 281                                | network (1,2)                                                                           | X |   |   |

(1) Orkin et al, Cold Spring Harb Symp Quant Biol, 2008 Nov 6

(2) Wang et al, Nature 2006, 444, 364-368.

(3) Wang et al, Stem Cells 2008, 26, 2791-2799.

(4) Kim et al, Cell 2008, 132, 1049-1061.

(5) Muller et al, Nature 2008, 455, 401-405.

(6) Kim et al, Stem Cells. 2005 Apr;23(4):458-62.

**Table s2.** Proteins identified in the current study. Listed are the IPI and UniProt accession numbers, gene symbol, protein name, by which strategy the protein was identified (2DLC, 1DE, UF), which strategy provided information for isoform determination, number of transmembrane domains, protein length, sequence coverage observed, protein probability, number of unique peptides and number of unique peptide sequences observed.

| IPI           | UNIPROT  | GENE   | Protein                                                            | Evidence for Isoform identified in |     |    | TM   | LENGTH (AA) | Coverage (%) |     |    | Protein Probability |      |      | # Unique Peptides |     |    | # Unique Peptide Sequences |     |    |
|---------------|----------|--------|--------------------------------------------------------------------|------------------------------------|-----|----|------|-------------|--------------|-----|----|---------------------|------|------|-------------------|-----|----|----------------------------|-----|----|
|               |          |        |                                                                    | 2DLC                               | 1DE | UF |      |             | 2DLC         | 1DE | UF | 2DLC                | 1DE  | UF   | 2DLC              | 1DE | UF | 2DLC                       | 1DE | UF |
| IPI00321308.4 | Q8BGQ7   | Aars   | Alanyl-tRNA synthetase, cytoplasmic                                |                                    | X   | X  | 0    | 968         | 0            | 22  | 19 | 1.00                | 1.00 | 0    | 13                | 12  | 0  | 13                         | 12  |    |
| IPI00648915.1 | A2A4P4   | Aarsd1 | Alanyl-tRNA synthetase domain containing 1                         | X                                  |     |    | 0    | 543         | 30           | 0   | 0  | 1.00                |      | 7    | 0                 | 0   | 7  | 0                          | 0   |    |
| IPI00265219.4 | Q5SSE9   | Abca13 | ATP-binding cassette sub-family A member 13                        |                                    |     | X  | 17   | 5034        | 0            | 0   | 3  |                     | 0.98 | 0    | 0                 | 6   | 0  | 0                          | 6   |    |
| IPI00111686.5 | Q3TZN9   | Abcc4  | Putative uncharacterized protein                                   |                                    | X   |    | 11   | 1325        | 0            | 2   | 0  | 1.00                |      | 0    | 2                 | 0   | 0  | 2                          | 0   |    |
| IPI00135646.1 | P55096   | Abcd3  | ATP-binding cassette sub-family D member 3                         |                                    | X   |    | 5    | 659         | 0            | 7   | 0  |                     | 0.96 | 0    | 2                 | 0   | 0  | 2                          | 0   |    |
| IPI00322869.3 | P61222   | Abce1  | ATP-binding cassette sub-family E member 1                         | X                                  | X   | X  | 0    | 599         | 7            | 43  | 21 | 0.99                | 1.00 | 1.00 | 2                 | 19  | 9  | 2                          | 19  | 9  |
| IPI00396671.1 | Q6P542   | Abcf1  | ATP-binding cassette sub-family F member 1                         | X                                  | X   |    | 0    | 837         | 12           | 6   | 0  | 1.00                | 1.00 |      | 9                 | 4   | 0  | 8                          | 4   | 0  |
| IPI00116825.1 | Q99LE6   | Abcf2  | ATP-binding cassette sub-family F member 2                         |                                    | X   | X  | 0    | 628         | 0            | 13  | 4  | 1.00                | 1.00 | 0    | 7                 | 2   | 0  | 7                          | 2   |    |
| IPI00471226.2 | Q9QYL7   | Abt1   | Activator of basal transcription 1                                 | X                                  |     |    | 0    | 269         | 20           | 0   | 0  | 1.00                |      | 5    | 0                 | 0   | 5  | 0                          | 0   |    |
| IPI00121833.3 | Q921H8   | Acaa1a | 3-ketoacyl-CoA thiolase A, peroxisomal                             |                                    |     | X  | 0    | 424         | 0            | 0   | 14 |                     | 1.00 | 0    | 0                 | 3   | 0  | 0                          | 3   |    |
| IPI00848443.1 | Q5SWU9-2 | Acaca  | Acetyl-CoA carboxylase 1                                           |                                    | X   |    | 2    | 2383        | 0            | 4   | 0  | 1.00                |      | 0    | 8                 | 0   | 0  | 8                          | 0   |    |
| IPI00330747.2 | Q80XL6   | Acad11 | Acyl-CoA dehydrogenase family member 11                            |                                    | X   |    | 1    | 779         | 0            | 4   | 0  |                     | 0.95 | 0    | 2                 | 0   | 0  | 2                          | 0   |    |
| IPI00759881.1 | Q3ULL9   | Acad9  | very-long-chain acyl-CoA dehydrogenase VLCAD homolog precursor     |                                    | X   | X  | 4    | 625         | 0            | 11  | 6  | 1.00                | 1.00 | 0    | 4                 | 2   | 0  | 4                          | 2   |    |
| IPI00134961.1 | P45952   | Acadm  | Medium-chain specific acyl-CoA dehydrogenase, mitochondrial        |                                    | X   | X  | 0    | 421         | 0            | 19  | 11 | 1.00                | 1.00 | 0    | 5                 | 2   | 0  | 5                          | 2   |    |
| IPI00121136.6 | Q9JIX8   | Acin1  | Apoptotic chromatin condensation inducer in the nucleus            | X                                  |     | X  | 0    | 1338        | 2            | 0   | 4  | 1.00                | 1.00 | 3    | 0                 | 3   | 3  | 0                          | 3   |    |
| IPI00126248.3 | Q3V117   | Acly   | Putative uncharacterized protein                                   |                                    | X   | X  | 2    | 1101        | 0            | 17  | 11 | 1.00                | 1.00 | 0    | 13                | 9   | 0  | 13                         | 9   |    |
| IPI00116074.1 | Q99KI0   | Aco2   | Aconitate hydratase, mitochondrial                                 | X                                  | X   | X  | 1    | 780         | 9            | 19  | 5  | 1.00                | 1.00 | 4    | 12                | 3   | 4  | 12                         | 3   |    |
| IPI00132958.1 | Q9CQR4   | Acot13 | Acyl-coenzyme A thioesterase 13                                    |                                    | X   |    | 0    | 140         | 0            | 16  | 0  | 1.00                |      | 0    | 2                 | 0   | 0  | 2                          | 0   |    |
| IPI00556850.1 | Q561M1   | Acp1   | acid phosphatase 1                                                 |                                    |     | X  | 0    | 158         | 0            | 0   | 13 |                     | 0.96 | 0    | 0                 | 3   | 0  | 0                          | 3   |    |
| IPI00411079.2 | Q5D071   | Acs14  | Acyl-CoA synthetase long-chain family member 4                     |                                    | X   |    | 1    | 711         | 0            | 4   | 0  |                     | 0.99 | 0    | 3                 | 0   | 0  | 3                          | 0   |    |
| IPI00221528.1 | Q8BFZ3   | Actb12 | Beta-actin-like protein 2                                          | X                                  | X   | X  | 0    | 376         | 17           | 33  | 29 | 1.00                | 1.00 | 1.00 | 3                 | 13  | 11 | 3                          | 8   | 9  |
| IPI00114593.1 | P68033   | Actc1  | Actin, alpha cardiac muscle 1                                      | X                                  | X   |    | 0    | 377         | 16           | 24  | 0  | 1.00                | 1.00 | 5    | 9                 | 0   | 4  | 9                          | 0   |    |
| IPI00874482.1 | P63260   | Actg1  | Actin, cytoplasmic 2                                               | X                                  |     |    | 0    | 375         | 26           | 0   | 0  | 1.00                |      | 6    | 0                 | 0   | 6  | 0                          | 0   |    |
| IPI00323660.1 | Q9Z2N8   | Actl6a | Actin-like protein 6A                                              | X                                  | X   | X  | 1    | 429         | 14           | 5   | 12 | 1.00                | 1.00 | 1.00 | 3                 | 2   | 3  | 3                          | 2   | 3  |
| IPI00380436.1 | Q7TPR4   | Actn1  | Alpha-actinin-1                                                    | X                                  | X   | X  | 1    | 892         | 3            | 19  | 20 | 0.00                | 1.00 | 1.00 | 2                 | 15  | 14 | 2                          | 14  | 14 |
| IPI00118899.1 | P57780   | Actn4  | Alpha-actinin-4                                                    | X                                  | X   | X  | 1    | 912         | 16           | 30  | 28 | 1.00                | 1.00 | 1.00 | 11                | 21  | 19 | 10                         | 20  | 19 |
| IPI00113895.1 | P61164   | Actr1a | Alpha-centractin                                                   |                                    |     | X  | 1    | 376         | 0            | 0   | 6  |                     | 1.00 | 0    | 0                 | 2   | 0  | 0                          | 2   |    |
| IPI00177038.1 | P61161   | Actr2  | Actin-related protein 2                                            |                                    |     | X  | 1    | 394         | 0            | 0   | 8  |                     | 0.99 | 0    | 0                 | 3   | 0  | 0                          | 3   |    |
| IPI00115627.4 | Q99JY9   | Actr3  | Actin-related protein 3                                            |                                    | X   |    | 1    | 418         | 0            | 0   | 11 |                     | 1.00 | 0    | 0                 | 2   | 0  | 0                          | 2   |    |
| IPI00261467.6 | P03958   | Ada    | Adenosine deaminase                                                |                                    |     | X  | 0    | 352         | 0            | 0   | 7  |                     | 0.96 | 0    | 0                 | 2   | 0  | 0                          | 2   |    |
| IPI00395222.1 | Q99MU3   | Adar   | Isoform 1 or 2 of Double-stranded RNA-specific adenosine deaminase | X                                  |     |    | 2DLC | 0           | 1178         | 3   | 0  | 0                   | 0.99 |      | 2                 | 0   | 0  | 2                          | 0   | 0  |
| IPI00555004.3 | P28474   | Adh5   | Alcohol dehydrogenase class-3                                      |                                    | X   | X  | 1    | 374         | 0            | 30  | 12 | 1.00                | 1.00 | 0    | 6                 | 3   | 0  | 6                          | 3   |    |
| IPI00126940.1 | P55264   | Adk    | Isoform Long of Adenosine kinase                                   |                                    | X   |    | 1DE  | 1           | 361          | 0   | 21 | 0                   | 1.00 |      | 0                 | 4   | 0  | 0                          | 4   | 0  |

|               |          |          |                                                                                           |  |   |   |   |   |      |    |    |    |      |      |      |    |    |    |    |    |
|---------------|----------|----------|-------------------------------------------------------------------------------------------|--|---|---|---|---|------|----|----|----|------|------|------|----|----|----|----|----|
| IPI00265471.2 | Q3TMB8   | Adsl     | Putative uncharacterized protein                                                          |  | X | X |   | 0 | 484  | 0  | 13 | 7  | 1.00 | 1.00 | 0    | 3  | 2  | 0  | 3  | 2  |
| IPI00135969.2 | P46664   | Adss     | Adenylosuccinate synthetase isozyme 2                                                     |  |   | X |   | 2 | 456  | 0  | 0  | 20 |      | 1.00 | 0    | 0  | 7  | 0  | 0  | 7  |
| IPI00467786.2 | Q8C095   | Aen      | Apoptosis-enhancing nuclease                                                              |  | X |   |   | 0 | 366  | 12 | 0  | 0  | 1.00 |      | 3    | 0  | 0  | 3  | 0  | 0  |
| IPI00229454.1 | P63002-2 | Aes      | Amino-terminal enhancer of split                                                          |  | X |   |   | 0 | 202  | 14 | 0  | 0  | 1.00 |      | 2    | 0  | 0  | 2  | 0  | 0  |
| IPI00170357.5 | Q8JZQ2   | Afg3l2   | AFG3-like protein 2                                                                       |  |   | X |   | 2 | 802  | 0  | 6  | 0  | 1.00 |      | 0    | 5  | 0  | 0  | 5  | 0  |
| IPI00223818.2 | A2AL50   | Agps     | Alkylglycerone phosphate synthase                                                         |  | X |   |   | 0 | 671  | 0  | 16 | 0  | 1.00 |      | 0    | 6  | 0  | 0  | 6  | 0  |
| IPI00122594.4 | Q8CJF7   | Ahctf1   | Protein ELYS                                                                              |  |   | X |   | 2 | 2243 | 0  | 0  | 1  |      | 1.00 | 0    | 0  | 2  | 0  | 0  | 2  |
| IPI00230440.6 | P50247   | Ahcy     | Adenosylhomocysteinase                                                                    |  | X | X |   | 1 | 432  | 0  | 41 | 37 | 1.00 | 1.00 | 0    | 13 | 13 | 0  | 13 | 12 |
| IPI00553798.2 | A0PJF4   | Ahnak    | AHNAK nucleoprotein                                                                       |  | X | X | X | 0 | 5656 | 4  | 8  | 9  | 1.00 | 1.00 | 1.00 | 9  | 4  | 7  | 9  | 4  |
| IPI00153740.1 | Q8BK64   | Ahsa1    | Activator of 90 kDa heat shock protein ATPase homolog 1                                   |  | X | X |   | 0 | 338  | 23 | 27 | 0  | 1.00 | 1.00 |      | 4  | 5  | 0  | 4  | 5  |
| IPI00828748.1 | A2ALW0   | Al314180 | Novel protein containing 10 HEAT domains Uncharacterized protein C14orf133                |  | X |   |   | 6 | 1840 | 0  | 2  | 0  | 1.00 |      | 0    | 2  | 0  | 0  | 2  | 0  |
| IPI00400395.1 | Q8BGQ1   | Al413782 | homolog                                                                                   |  | X |   |   | 1 | 491  | 12 | 0  | 0  | 1.00 |      | 4    | 0  | 0  | 4  | 0  | 0  |
| IPI00129577.1 | Q9Z0X1   | Aifm1    | Apoptosis-inducing factor 1, mitochondrial small inducible cytokine subfamily E, member 1 |  | X |   |   | 2 | 612  | 0  | 16 | 0  | 1.00 |      | 0    | 7  | 0  | 0  | 7  | 0  |
| IPI00132194.3 | Q3UZG4   | Aimp1    | Aminoacyl tRNA synthetase complex-interacting multifunctional protein 2                   |  | X | X |   | 0 | 319  | 29 | 0  | 18 | 1.00 | 1.00 | 7    | 0  | 4  | 7  | 0  | 4  |
| IPI00153103.3 | Q8R010   | Aimp2    | Adherens junction-associated protein 1                                                    |  | X | X | X | 0 | 320  | 11 | 20 | 31 | 1.00 | 1.00 | 1.00 | 2  | 3  | 4  | 2  | 3  |
| IPI00125794.6 | A2ALI5   | Ajap1    | Adenylate kinase isoenzyme 1                                                              |  |   | X |   | 2 | 412  | 0  | 0  | 12 |      | 0.91 | 0    | 0  | 3  | 0  | 0  | 3  |
| IPI00750256.2 | Q9R0Y5-2 | Ak1      | Adenylate kinase 2, mitochondrial                                                         |  | X | X |   | 0 | 210  | 9  | 0  | 17 | 0.99 |      | 0.99 | 2  | 0  | 2  | 2  | 0  |
| IPI00648318.1 | Q9WTP6   | Ak2      | Isoform 1 of A-kinase anchor protein 12                                                   |  | X |   |   | 0 | 239  | 0  | 21 | 0  | 1.00 |      | 0    | 3  | 0  | 0  | 3  | 0  |
| IPI00123709.1 | Q9WTQ5   | Akap12   | A-kinase anchor protein 2                                                                 |  | X | X | X | 0 | 1684 | 31 | 30 | 10 | 1.00 | 1.00 | 1.00 | 34 | 32 | 11 | 31 | 32 |
| IPI00649060.1 | O54931   | Akap2    | A-kinase anchor protein 8                                                                 |  | X |   |   | 0 | 1137 | 12 | 0  | 0  | 1.00 |      | 10   | 0  | 0  | 9  | 0  | 0  |
| IPI00321739.1 | Q9DBR0   | Akap8    | Alcohol dehydrogenase [NADP+]                                                             |  | X |   |   | 0 | 687  | 5  | 0  | 0  | 1.00 |      | 2    | 0  | 0  | 2  | 0  | 0  |
| IPI00466128.3 | Q9JII6   | Akr1a4   | Aldose reductase                                                                          |  | X |   | X | 0 | 325  | 16 | 0  | 6  | 1.00 |      | 1.00 | 4  | 0  | 2  | 3  | 0  |
| IPI00223757.4 | P45376   | Akr1b3   | Aldo-keto reductase family 1 member C21                                                   |  | X | X | X | 0 | 316  | 34 | 50 | 50 | 1.00 | 1.00 | 1.00 | 5  | 12 | 11 | 5  | 12 |
| IPI00830240.1 | Q91WR5   | Akr1c21  | Delta-1-pyrroline-5-carboxylate synthetase                                                |  |   | X |   | 1 | 795  | 0  | 24 | 0  | 1.00 |      | 0    | 15 | 0  | 0  | 14 | 0  |
| IPI00111218.1 | P47738   | Aldh2    | Aldehyde dehydrogenase, mitochondrial                                                     |  | X | X |   | 0 | 519  | 0  | 21 | 19 | 1.00 | 1.00 | 0    | 8  | 6  | 0  | 8  | 6  |
| IPI00856379.1 | A6Z144   | Aldoa    | Fructose-bisphosphate aldolase                                                            |  | X | X | X | 0 | 418  | 47 | 61 | 52 | 1.00 | 1.00 | 1.00 | 18 | 20 | 16 | 16 | 20 |
| IPI00263333.1 | Q8K371   | Amotl2   | Isoform 1 of Angiomotin-like protein 2                                                    |  | X |   |   | 0 | 772  | 7  | 0  | 0  | 1.00 |      | 2    | 0  | 0  | 2  | 0  | 0  |
| IPI00229274.1 | Q8CFA2   | Amt      | Aminomethyltransferase, mitochondrial                                                     |  |   | X |   | 0 | 403  | 0  | 0  | 9  |      | 0.99 | 0    | 0  | 2  | 0  | 0  | 2  |
| IPI00153118.1 | Q8R034   | Anapc13  | Anaphase-promoting complex subunit 13                                                     |  | X |   |   | 0 | 74   | 38 | 0  | 0  | 1.00 |      | 2    | 0  | 0  | 2  | 0  | 0  |
| IPI00465535.1 | Q99NH0   | Ankrd17  | Ankyrin repeat domain-containing protein 17                                               |  |   | X |   | 4 | 2603 | 0  | 0  | 1  |      | 1.00 | 0    | 0  | 2  | 0  | 0  | 2  |
| IPI00172197.2 | Q8K298   | Anln     | Actin-binding protein anillin                                                             |  | X | X |   | 0 | 1121 | 10 | 0  | 6  | 1.00 |      | 1.00 | 7  | 0  | 5  | 7  | 0  |
| IPI00756965.1 | A2AHL1   | Ano3     | Anoctamin-3                                                                               |  |   | X |   | 9 | 981  | 0  | 0  | 5  |      | 0.95 | 0    | 0  | 2  | 0  | 0  | 2  |
| IPI00314736.3 | O35381   | Anp32a   | Acidic leucine-rich nuclear phosphoprotein 32 family member A                             |  | X | X |   | 0 | 247  | 0  | 28 | 11 | 1.00 | 1.00 | 0    | 6  | 3  | 0  | 6  | 3  |
| IPI00113536.3 | Q9EST5-2 | Anp32b   | Acidic leucine-rich nuclear phosphoprotein 32 family member B                             |  | X | X |   | 1 | 329  | 0  | 23 | 30 | 1.00 | 1.00 | 0    | 8  | 8  | 0  | 8  | 8  |
| IPI00130016.1 | P97822   | Anp32e   | Acidic leucine-rich nuclear phosphoprotein 32 family member E                             |  |   | X |   | 0 | 260  | 0  | 0  | 11 |      | 1.00 | 0    | 0  | 2  | 0  | 0  | 2  |
| IPI00652811.1 | Q3US43   | Anxa1    | Putative uncharacterized protein                                                          |  |   | X |   | 0 | 355  | 0  | 0  | 11 |      | 1.00 | 0    | 0  | 2  | 0  | 0  | 2  |
| IPI00468203.3 | P07356   | Anxa2    | Annexin A2                                                                                |  | X | X |   | 0 | 339  | 14 | 0  | 17 | 1.00 |      | 1.00 | 3  | 0  | 3  | 3  | 0  |
| IPI00554894.2 | P14824   | Anxa6    | Annexin A6                                                                                |  |   | X | X | 0 | 673  | 0  | 19 | 5  | 1.00 | 0.97 | 0    | 12 | 4  | 0  | 12 | 4  |
| IPI00648683.3 | Q8CC13   | Ap1b1    | Putative uncharacterized protein                                                          |  | X | X |   | 1 | 953  | 0  | 22 | 14 | 1.00 | 1.00 | 0    | 13 | 7  | 0  | 13 | 7  |
| IPI00224151.5 | Q3UKX8   | Ap1g1    | Putative uncharacterized protein                                                          |  | X | X |   | 0 | 825  | 0  | 6  | 7  | 1.00 | 1.00 | 0    | 3  | 3  | 0  | 3  | 3  |

|                |          |         |                                                                            |   |   |   |      |      |     |    |    |      |      |      |   |    |   |   |    |   |
|----------------|----------|---------|----------------------------------------------------------------------------|---|---|---|------|------|-----|----|----|------|------|------|---|----|---|---|----|---|
| IPI00108780.7  | P17426   | Ap2a1   | AP-2 complex subunit alpha-1 adaptor protein complex AP-2, alpha 2 subunit |   | X |   | 2    | 977  | 0   | 0  | 5  |      | 1.00 | 0    | 0 | 3  | 0 | 0 | 3  |   |
| IPI00753468.2  | Q8C2J5   | Ap2a2   |                                                                            | X | X |   | 1    | 938  | 1   | 10 | 0  | 0.00 | 1.00 | 1    | 7 | 0  | 1 | 7 | 0  |   |
| IPI00378063.1  | Q9DBG3-2 | Ap2b1   | AP-2 complex subunit beta                                                  |   | X | X | 1    | 951  | 0   | 17 | 13 |      | 1.00 | 1.00 | 0 | 12 | 7 | 0 | 12 | 7 |
| IPI00116356.5  | P84091   | Ap2m1   | AP-2 complex subunit mu                                                    |   |   | X | 1    | 435  | 0   | 0  | 6  |      | 1.00 | 0    | 0 | 2  | 0 | 0 | 2  |   |
| IPI00118022.1  | P62743   | Ap2s1   | AP-2 complex subunit sigma                                                 |   |   | X | 0    | 142  | 0   | 13 | 0  |      | 1.00 | 0    | 2 | 0  | 0 | 2 | 0  |   |
| IPI00224152.5  | P28352   | Apex1   | DNA-(apurinic or apyrimidinic site) lyase                                  | X | X | X | 0    | 317  | 18  | 18 | 17 | 1.00 | 1.00 | 1.00 | 3 | 3  | 4 | 3 | 3  | 4 |
| IPI00399961.2  | Q3UYQ4   | Api5    | Putative uncharacterized protein                                           |   | X | X | 0    | 524  | 0   | 12 | 15 |      | 1.00 | 1.00 | 0 | 3  | 5 | 0 | 3  | 5 |
| IPI00330933.6  | Q9WVQ5   | Apij    | APAF1-interacting protein                                                  |   | X |   | 0    | 241  | 13  | 0  | 0  | 0.99 |      | 2    | 0 | 0  | 2 | 0 | 0  |   |
| IPI00625950.2  | Q6PK77   | Aprt    | adenine phosphoribosyltransferase                                          |   | X | X | 0    | 180  | 0   | 67 | 35 |      | 1.00 | 1.00 | 0 | 8  | 5 | 0 | 8  | 5 |
| IPI00377288.3  | Q4LDD4   | Arap1   | Arf-GAP with Rho-GAP domain, ANK repeat and PH domain-containing protein 1 |   |   | X | 1    | 1452 | 0   | 0  | 3  |      | 1.00 | 0    | 0 | 3  | 0 | 0 | 3  |   |
| IPI00849044.2  | Q91W48   | Arcn1   | Putative uncharacterized protein                                           |   | X |   | 0    | 511  | 12  | 0  | 0  | 1.00 |      | 5    | 0 | 0  | 5 | 0 | 0  |   |
| IPI00758413.2  | Q3V4D5   | Ard1a   | N-acetyltransferase ARD1 homolog (S. cerevisiae), isoform CRA_b            | X |   | X | UF   | 0    | 225 | 17 | 0  | 11   | 0.01 | 1.00 | 3 | 0  | 2 | 2 | 0  | 2 |
| IPI00221613.5  | P84078   | Arf1    | ADP-ribosylation factor 1                                                  |   | X | X | 0    | 181  | 0   | 49 | 19 |      | 1.00 | 0.93 | 0 | 8  | 3 | 0 | 7  | 3 |
| IPI00876029.1  | P61750   | Arf4    | ADP-ribosylation factor 4                                                  |   |   | X | 0    | 181  | 0   | 38 | 0  |      | 1.00 | 0    | 5 | 0  | 0 | 4 | 0  |   |
| IPI00221615.5  | P84084   | Arf5    | ADP-ribosylation factor 5                                                  |   |   | X | 0    | 180  | 0   | 0  | 19 |      | 0.96 | 0    | 0 | 3  | 0 | 0 | 3  |   |
| IPI00387227.1  | Q9EPJ9   | Arfgap1 | Isoform 1 of ADP-ribosylation factor GTPase-activating protein 1           | X |   |   | 2DLC | 0    | 414 | 21 | 0  | 0    | 1.00 |      | 5 | 0  | 0 | 5 | 0  | 0 |
| IPI00109656.2  | Q99K28-2 | Arfgap2 | ADP-ribosylation factor GTPase-activating protein 2                        |   | X |   | 0    | 534  | 10  | 0  | 0  | 1.00 |      | 3    | 0 | 0  | 3 | 0 | 0  |   |
| IPI00322312.3  | Q99PT1   | Arhgdia | Rho GDP-dissociation inhibitor 1                                           | X | X | X | 0    | 204  | 33  | 41 | 23 | 1.00 | 1.00 | 1.00 | 6 | 7  | 3 | 5 | 7  | 3 |
| IPI00652900.1  | Q61210-5 | Arhgef1 | Rho guanine nucleotide exchange factor 1                                   |   | X |   | 0    | 979  | 7   | 0  | 0  | 1.00 |      | 4    | 0 | 0  | 4 | 0 | 0  |   |
| IPI00655136.3  | Q9ES28   | Arhgef7 | Rho guanine nucleotide exchange factor 7                                   | X |   |   | 0    | 862  | 4   | 0  | 0  | 1.00 |      | 2    | 0 | 0  | 2 | 0 | 0  |   |
| IPI00648459.1  | A2BH40   | Arid1a  | AT rich interactive domain 1A                                              |   | X |   | 1    | 2283 | 7   | 0  | 0  | 1.00 |      | 10   | 0 | 0  | 8 | 0 | 0  |   |
| IPI00848707.3  |          | Arid1b  | AT rich interactive domain 1B                                              |   | X |   | 4    | 2244 | 2   | 0  | 0  | 1.00 |      | 2    | 0 | 0  | 2 | 0 | 0  |   |
| IPI00278498.10 | P61211   | Arf1    | ADP-ribosylation factor-like protein 1                                     |   |   | X | 0    | 181  | 0   | 11 | 0  | 1.00 |      | 0    | 2 | 0  | 0 | 2 | 0  |   |
| IPI00124787.3  | Q9WUL7   | Arf3    | ADP-ribosylation factor-like protein 3                                     | X |   |   | 0    | 182  | 41  | 0  | 0  | 1.00 |      | 4    | 0 | 0  | 4 | 0 | 0  |   |
| IPI00137460.3  | Q9D0L7   | Armc10  | Armadillo repeat-containing protein 10                                     |   |   | X | 2    | 387  | 0   | 0  | 15 |      | 1.00 | 0    | 0 | 2  | 0 | 0 | 2  |   |
| IPI00661414.2  | Q9CVB6   | Arpc2   | Actin-related protein 2/3 complex subunit 2                                |   |   | X | 0    | 300  | 0   | 0  | 6  |      | 1.00 | 0    | 0 | 2  | 0 | 0 | 2  |   |
| IPI00124829.5  | Q9JM76   | Arpc3   | Actin-related protein 2/3 complex subunit 3                                | X |   |   | 0    | 178  | 13  | 0  | 0  | 1.00 |      | 2    | 0 | 0  | 2 | 0 | 0  |   |
| IPI00138691.6  | P59999   | Arpc4   | Actin-related protein 2/3 complex subunit 4                                | X |   |   | 0    | 168  | 11  | 0  | 0  | 1.00 |      | 2    | 0 | 0  | 2 | 0 | 0  |   |
| IPI00399943.3  | Q9CPW4   | Arpc5   | Actin-related protein 2/3 complex subunit 5                                | X |   |   | 0    | 151  | 13  | 0  | 0  | 0.95 |      | 2    | 0 | 0  | 2 | 0 | 0  |   |
| IPI00111117.5  | Q9D898   | Arpc5l  | Actin-related protein 2/3 complex subunit 5-like protein                   | X |   | X | 0    | 153  | 29  | 0  | 22 | 1.00 | 1.00 | 3    | 0 | 3  | 3 | 0 | 3  |   |
| IPI00647964.2  | Q91YI4-2 | Arrb2   | Beta-arrestin-2                                                            |   | X |   | 0    | 421  | 7   | 0  | 0  | 1.00 |      | 2    | 0 | 0  | 2 | 0 | 0  |   |
| IPI00127472.2  | P98203-3 | Arvcf   | Armadillo repeat protein deleted in velo-cardio-facial syndrome homolog    | X |   |   | 0    | 976  | 4   | 0  | 0  | 1.00 |      | 2    | 0 | 0  | 2 | 0 | 0  |   |
| IPI00134544.3  | Q9QWY8   | Asap1   | Arf-GAP with SH3 domain, ANK repeat and PH domain-containing protein 1     | X |   |   | 0    | 1147 | 4   | 0  | 0  | 0.96 |      | 2    | 0 | 0  | 2 | 0 | 0  |   |
| IPI00553465.4  | Q99MY8   | Ash1l   | Probable histone-lysine N-methyltransferase ASH1L                          |   |   | X | 0    | 2958 | 0   | 0  | 4  |      | 0.98 | 0    | 0 | 9  | 0 | 0 | 9  |   |
| IPI00131513.5  | Q91X20   | Ash2l   | Set1/Ash2 histone methyltransferase complex subunit ASH2                   | X |   |   | 0    | 623  | 8   | 0  | 0  | 1.00 |      | 3    | 0 | 0  | 3 | 0 | 0  |   |
| IPI00314788.5  | Q91YI0   | Asl     | Argininosuccinate lyase                                                    |   |   | X | 2    | 464  | 0   | 0  | 8  |      | 1.00 | 0    | 0 | 3  | 0 | 0 | 3  |   |
| IPI00116966.8  | Q61024   | Asns    | Asparagine synthetase [glutamine-hydrolyzing]                              |   |   | X | 1    | 561  | 0   | 0  | 9  |      | 1.00 | 0    | 0 | 4  | 0 | 0 | 4  |   |

|               |          |          |                                                      |   |   |      |     |      |    |    |      |      |      |      |    |    |    |    |    |    |
|---------------|----------|----------|------------------------------------------------------|---|---|------|-----|------|----|----|------|------|------|------|----|----|----|----|----|----|
| IPI00121364.2 | Q8VBT9   | Aspscr1  | Tether containing UBX domain for GLUT4               | X |   | 0    | 550 | 6    | 0  | 0  | 1.00 |      | 2    | 0    | 0  | 2  | 0  | 0  |    |    |
| IPI00134746.5 | P16460   | Ass1     | Argininosuccinate synthase                           | X |   | 0    | 412 | 24   | 0  | 0  | 1.00 |      | 6    | 0    | 0  | 5  | 0  | 0  |    |    |
| IPI00126913.5 | Q92511   | Atad3a   | ATPase family AAA domain-containing protein 3        |   | X | X    | 0   | 591  | 0  | 9  | 8    | 1.00 | 0.99 | 0    | 4  | 2  | 0  | 4  | 2  |    |
| IPI00117379.3 | O08997   | Atox1    | Copper transport protein ATOX1                       | X | X | X    | 0   | 68   | 21 | 59 | 46   | 0.96 | 1.00 | 1.00 | 2  | 4  | 2  | 2  | 4  | 2  |
| IPI00311682.5 | Q8VDN2   | Atp1a1   | Sodium/potassium-transporting ATPase subunit alpha-1 |   | X | X    | 7   | 1023 | 0  | 22 | 5    | 1.00 | 1.00 | 0    | 19 | 5  | 0  | 18 | 5  |    |
| IPI00124221.1 | P97370   | Atp1b3   | Sodium/potassium-transporting ATPase subunit beta-3  |   |   | X    | 0   | 278  | 0  | 0  | 13   |      | 1.00 | 0    | 0  | 2  | 0  | 0  | 2  |    |
| IPI00311654.4 | Q8R429   | Atp2a1   | Sarcoplasmic/endoplasmic reticulum calcium ATPase 1  |   | X |      | 10  | 994  | 0  | 6  | 0    | 0.96 |      | 0    | 4  | 0  | 0  | 4  | 0  |    |
| IPI00338964.3 | O55143   | Atp2a2   | Sarcoplasmic/endoplasmic reticulum calcium ATPase 2  |   | X | X    | 11  | 1044 | 0  | 11 | 9    | 1.00 | 1.00 | 0    | 7  | 6  | 0  | 7  | 6  |    |
| IPI00130280.1 | Q03265   | Atp5a1   | ATP synthase subunit alpha, mitochondrial            | X | X |      | 0   | 553  | 0  | 42 | 37   | 1.00 | 1.00 | 0    | 20 | 18 | 0  | 19 | 18 |    |
| IPI00468481.2 | P56480   | Atp5b    | ATP synthase subunit beta, mitochondrial             | X | X |      | 2   | 529  | 0  | 66 | 51   | 1.00 | 1.00 | 0    | 25 | 20 | 0  | 21 | 19 |    |
| IPI00313475.1 | Q91VR2   | Atp5c1   | ATP synthase subunit gamma, mitochondrial            |   | X | X    | 0   | 298  | 0  | 36 | 8    | 1.00 | 1.00 | 0    | 8  | 2  | 0  | 8  | 2  |    |
| IPI00453777.2 | Q9D3D9   | Atp5d    | ATP synthase subunit delta, mitochondrial            | X |   |      | 1   | 168  | 0  | 38 | 0    | 1.00 |      | 0    | 4  | 0  | 0  | 4  | 0  |    |
| IPI00341282.2 | Q9CQQ7   | Atp5f1   | ATP synthase subunit f, mitochondrial                |   | X | X    | 1   | 256  | 0  | 29 | 20   | 1.00 | 1.00 | 0    | 6  | 4  | 0  | 6  | 4  |    |
| IPI00230507.5 | Q9DCX2   | Atp5h    | ATP synthase subunit h, mitochondrial                | X | X | X    | 0   | 161  | 18 | 42 | 43   | 0.97 | 1.00 | 1.00 | 2  | 7  | 5  | 2  | 6  | 5  |
| IPI00271986.6 | P56135   | Atp5j2   | ATP synthase subunit j, mitochondrial                |   | X |      | 1   | 88   | 0  | 33 | 0    | 1.00 |      | 0    | 3  | 0  | 0  | 3  | 0  |    |
| IPI00111770.7 | Q06185   | Atp5k    | ATP synthase subunit k, mitochondrial                |   | X |      | 0   | 71   | 0  | 70 | 0    | 1.00 |      | 0    | 5  | 0  | 0  | 5  | 0  |    |
| IPI00133342.1 | Q9CQY3   | Atp5l    | Putative uncharacterized protein                     |   | X |      | 1   | 129  | 0  | 39 | 0    | 1.00 |      | 0    | 7  | 0  | 0  | 5  | 0  |    |
| IPI00407692.3 | P50516   | Atp6v1a  | V-type proton ATPase catalytic subunit A             |   | X |      | 0   | 617  | 0  | 6  | 0    | 1.00 |      | 0    | 3  | 0  | 0  | 3  | 0  |    |
| IPI00119113.3 | P62814   | Atp6v1b2 | V-type proton ATPase subunit B, brain isoform        |   |   | X    | 1   | 511  | 0  | 0  | 7    |      | 1.00 | 0    | 0  | 2  | 0  | 0  | 2  |    |
| IPI00118787.1 | P57746   | Atp6v1d  | V-type proton ATPase subunit D                       | X |   |      | 0   | 247  | 18 | 0  | 0    | 1.00 |      | 4    | 0  | 0  | 3  | 0  | 0  |    |
| IPI00116896.1 | P03930   | ATP8     | ATP synthase protein 8                               |   | X |      | 1   | 67   | 0  | 43 | 0    |      | 1.00 | 0    | 3  | 0  | 0  | 3  | 0  |    |
| IPI00223024.3 | Q8BMG1   | Atrip    | ATR-interacting protein                              |   |   | X    | 4   | 785  | 0  | 0  | 5    |      | 0.94 | 0    | 0  | 2  | 0  | 0  | 2  |    |
| IPI00123202.1 | P28658   | Atxn10   | Ataxin-10                                            |   | X | X    | 1   | 475  | 0  | 11 | 15   | 0.99 | 1.00 | 0    | 5  | 5  | 0  | 5  | 5  |    |
| IPI00117229.3 | Q62506   | Atxn2    | Ataxin 2                                             |   | X |      | 0   | 1286 | 8  | 0  | 0    | 1.00 |      | 6    | 0  | 0  | 6  | 0  | 0  |    |
| IPI00458001.1 | Q7TQH0-2 | Atxn2l   | Ataxin-2-like protein                                | X |   | X    | 0   | 1074 | 14 | 0  | 3    | 1.00 | 0.99 | 11   | 0  | 2  | 10 | 0  | 2  |    |
| IPI00230633.1 | P97477-2 | Aurka    | Serine/threonine-protein kinase 6                    | X |   |      | 0   | 417  | 13 | 0  | 0    | 1.00 |      | 3    | 0  | 0  | 3  | 0  | 0  |    |
| IPI00387315.1 | Q8C6C1   | Aurkb    | aurora kinase B                                      | X |   |      | 0   | 345  | 9  | 0  | 0    | 0.98 |      | 2    | 0  | 0  | 2  | 0  | 0  |    |
| IPI00226228.5 | Q62036   | Azi1     | 5-azacytidine-induced protein 1                      | X |   |      | 0   | 1060 | 3  | 0  | 0    | 1.00 |      | 3    | 0  | 0  | 2  | 0  | 0  |    |
| IPI00387388.3 | A6H663   | Bag3     | BCL2-associated athanogene 3                         | X |   |      | 0   | 577  | 19 | 0  | 0    | 1.00 |      | 8    | 0  | 0  | 7  | 0  | 0  |    |
| IPI00895277.1 | B1ASC0   | Bai2     | Brain-specific angiogenesis inhibitor 2              |   |   | X    | 9   | 1473 | 0  | 0  | 6    |      | 0.99 | 0    | 0  | 4  | 0  | 0  | 4  |    |
| IPI00119959.1 | O54962   | Banf1    | Barrier-to-autointegration factor                    | X | X | X    | 0   | 89   | 43 | 56 | 27   | 1.00 | 1.00 | 1.00 | 5  | 6  | 2  | 3  | 5  | 2  |
| IPI00129519.3 | Q91XV3   | Basp1    | Brain acid soluble protein 1                         | X |   |      | 0   | 226  | 46 | 0  | 0    | 1.00 |      | 6    | 0  | 0  | 6  | 0  | 0  |    |
| IPI00409462.2 | Q9Z1N5   | Bat1a    | Spliceosome RNA helicase Bat1                        | X | X | X    | 0   | 428  | 19 | 29 | 34   | 1.00 | 1.00 | 1.00 | 7  | 10 | 13 | 7  | 10 | 12 |
| IPI00380722.1 | Q7TSC1   | Bat2     | Large proline-rich protein BAT2                      | X |   |      | 0   | 2158 | 3  | 0  | 0    | 1.00 |      | 3    | 0  | 0  | 3  | 0  | 0  |    |
| IPI00330171.3 | Q3TLH4   | Bat2d    | BAT2 domain-containing protein 1                     | X |   | X    | 2   | 2950 | 13 | 0  | 8    | 1.00 |      | 1.00 | 11 | 0  | 2  | 11 | 0  | 2  |
| IPI00380415.2 | Q7TPM1   | Bat2l    | Protein BAT2-like                                    | X |   |      | 0   | 1486 | 4  | 0  | 0    | 1.00 |      | 3    | 0  | 0  | 3  | 0  | 0  |    |
| IPI00120684.2 | Q07813   | Bax      | Apoptosis regulator BAX                              |   | X |      | 1   | 192  | 0  | 12 | 0    |      | 1.00 | 0    | 2  | 0  | 0  | 2  | 0  |    |
| IPI00130157.2 | Q91YE5   | Baz2a    | bromodomain adjacent to zinc finger domain, 2A       |   |   | X    | 0   | 1887 | 0  | 0  | 2    |      | 0.94 | 0    | 0  | 2  | 0  | 0  | 2  |    |
| IPI00625898.3 | Q8VBW5   | Bbx      | Isoform 1 or 2 of HMG box transcription factor BBX   | X |   | 2DLC | 1   | 907  | 4  | 0  | 0    | 1.00 |      | 2    | 0  | 0  | 2  | 0  | 0  |    |
| IPI00115553.2 | Q3TQI7   | BC005624 | Uncharacterized protein C9orf78 homolog              | X |   |      | 0   | 289  | 39 | 0  | 0    | 1.00 |      | 10   | 0  | 0  | 7  | 0  | 0  |    |

|                |        |               |                                                                                  | Novel protein, possible orthologue of human peroxisomal proliferator-activated receptor A interacting complex 285 |   |      |      |      |     |    |    |      |      |      |      |    |    |    |    |    |   |
|----------------|--------|---------------|----------------------------------------------------------------------------------|-------------------------------------------------------------------------------------------------------------------|---|------|------|------|-----|----|----|------|------|------|------|----|----|----|----|----|---|
| IPI00653023.2  | A2AS03 | BC006779      | PRIC285                                                                          |                                                                                                                   | X |      | 3    | 2970 | 0   | 1  | 0  |      | 0.98 |      | 0    | 2  | 0  | 0  | 2  | 0  |   |
| IPI00347814.2  | Q5U445 | BC085271      | cDNA sequence BC085271                                                           | X                                                                                                                 | X |      | 0    | 289  | 15  | 34 | 0  | 1.00 | 1.00 |      | 3    | 7  | 0  | 3  | 7  | 0  |   |
| IPI00279010.6  | Q99K86 | Bcam          | Bcam protein                                                                     | X                                                                                                                 |   |      | 1    | 650  | 11  | 0  | 0  | 1.00 |      |      | 4    | 0  | 0  | 4  | 0  | 0  |   |
| IPI00316184.1  | Q9D287 | Bcas2         | Pre-mRNA-splicing factor SPF27                                                   | X                                                                                                                 |   |      | 0    | 225  | 11  | 0  | 0  | 1.00 |      |      | 2    | 0  | 0  | 2  | 0  | 0  |   |
| IPI00415385.1  | Q8K019 | Bclaf1        | Bcl-2-associated transcription factor 1                                          | X                                                                                                                 |   |      | 0    | 919  | 2   | 0  | 0  | 1.00 |      |      | 2    | 0  | 0  | 2  | 0  | 0  |   |
| IPI00134095.3  |        | Birc6         | baculoviral IAP repeat-containing 6                                              |                                                                                                                   | X |      | 15   | 4854 | 0   | 1  | 0  |      | 1.00 |      | 0    | 5  | 0  | 0  | 4  | 0  |   |
| IPI00153107.3  | Q8R016 | Blmh          | Bleomycin hydrolase                                                              |                                                                                                                   |   | X    | 0    | 455  | 0   | 0  | 11 |      | 1.00 |      | 0    | 0  | 3  | 0  | 0  | 3  |   |
| IPI00857740.1  | Q923D2 | Blvrh         | Flavin reductase                                                                 | X                                                                                                                 | X |      | 0    | 247  | 26  | 12 | 0  | 1.00 | 1.00 |      | 4    | 2  | 0  | 3  | 2  | 0  |   |
| IPI00453860.2  | Q6PGF5 | Bms1          | BMS1-like, ribosome assembly protein                                             | X                                                                                                                 |   |      | 1    | 1284 | 2   | 0  | 0  | 0.98 |      |      | 2    | 0  | 0  | 2  | 0  | 0  |   |
| IPI00111953.1  | Q9D8S9 | Bola1         | BolA-like protein 1                                                              | X                                                                                                                 |   |      | 0    | 137  | 28  | 0  | 0  | 0.91 |      |      | 2    | 0  | 0  | 2  | 0  | 0  |   |
| IPI00221694.1  | Q8BGS2 | Bola2         | Isoform 1 of Bola-like protein 2                                                 |                                                                                                                   | X | 1DE  | 0    | 86   | 0   | 33 | 0  |      | 1.00 |      | 0    | 2  | 0  | 0  | 2  | 0  |   |
| IPI00387354.5  | P97452 | Bop1          | Ribosome biogenesis protein BOP1                                                 |                                                                                                                   | X | X    | 0    | 732  | 0   | 5  | 6  |      | 1.00 | 0.99 | 0    | 2  | 4  | 0  | 2  | 4  |   |
| IPI00133099.1  | O88665 | Brd7          | Bromodomain-containing protein 7                                                 | X                                                                                                                 |   |      | 0    | 651  | 8   | 0  | 0  | 1.00 |      |      | 4    | 0  | 0  | 3  | 0  | 0  |   |
| IPI00130436.5  | Q9DCA5 | Brix1         | Brix domain-containing protein 2                                                 | X                                                                                                                 | X |      | 1    | 353  | 30  | 10 | 0  | 1.00 | 1.00 |      | 7    | 3  | 0  | 7  | 3  | 0  |   |
| IPI00408495.1  | P18572 | Bsg           | Basigin                                                                          |                                                                                                                   | X |      | 1    | 389  | 0   | 6  | 0  |      | 1.00 |      | 0    | 2  | 0  | 0  | 2  | 0  |   |
| IPI00515257.1  | Q64152 | Btf3          | Isoform 1 of Transcription factor BTF3                                           | X                                                                                                                 | X | X    | 2DLC | 0    | 204 | 66 | 37 | 46   | 1.00 | 1.00 | 1.00 | 10 | 3  | 4  | 8  | 3  | 4 |
| IPI00132539.3  | Q9CQH7 | Btf3l4        | Transcription factor BTF3 homolog 4                                              | X                                                                                                                 |   |      | 0    | 158  | 42  | 0  | 0  | 1.00 |      |      | 7    | 0  | 0  | 5  | 0  | 0  |   |
| IPI00420724.4  | O6ZWM5 | Bub3          | Putative uncharacterized protein                                                 | X                                                                                                                 |   |      | 0    | 326  | 16  | 0  | 0  | 1.00 |      |      | 4    | 0  | 0  | 3  | 0  | 0  |   |
| IPI00118762.6  | O54825 | Bysl          | Bystin                                                                           | X                                                                                                                 |   |      | 1    | 436  | 16  | 0  | 0  | 1.00 |      |      | 6    | 0  | 0  | 5  | 0  | 0  |   |
| IPI00132388.3  | Q9CQC6 | Bzw1          | Basic leucine zipper and W2 domain-containing protein 1                          |                                                                                                                   | X |      | 2    | 419  | 0   | 10 | 0  |      | 1.00 |      | 0    | 3  | 0  | 0  | 3  | 0  |   |
| IPI00330711.4  | Q3U155 | C130022K22Rik | Uncharacterized protein C3orf19 homolog                                          | X                                                                                                                 |   |      | 0    | 467  | 8   | 0  | 0  | 1.00 |      |      | 3    | 0  | 0  | 3  | 0  | 0  |   |
| IPI00132799.4  | Q8R5L1 | C1qbp         | complement component 1, q subcomponent binding protein                           | X                                                                                                                 | X | X    | 0    | 279  | 22  | 40 | 27 | 1.00 | 1.00 | 1.00 | 5    | 7  | 3  | 5  | 6  | 3  |   |
| IPI00226576.1  | Q8BWZ3 | C330023M02Rik | N-terminal acetyltransferase B complex subunit MDM20                             |                                                                                                                   | X |      | 3    | 972  | 0   | 15 | 0  |      | 1.00 |      | 0    | 9  | 0  | 0  | 8  | 0  |   |
| IPI00115650.4  | Q9CXW3 | Cacybp        | Calcyclin-binding protein                                                        | X                                                                                                                 | X | X    | 0    | 229  | 50  | 35 | 22 | 1.00 | 1.00 | 1.00 | 18   | 6  | 5  | 12 | 6  | 5  |   |
| IPI00380280.3  | B2RQC6 | Cad           | carbamoyl-phosphate synthetase 2, aspartate transcarbamylase, and dihydroorotase |                                                                                                                   | X | X    | 3    | 2225 | 0   | 34 | 12 |      | 1.00 | 1.00 | 0    | 55 | 17 | 0  | 54 | 17 |   |
| IPI00311344.3  |        | Cald1         | 89 kDa protein                                                                   | X                                                                                                                 |   |      | 0    | 769  | 13  | 0  | 0  | 1.00 |      |      | 6    | 0  | 0  | 6  | 0  | 0  |   |
| IPI00467841.6  | Q3UKW2 | Calm1         | Putative uncharacterized protein                                                 | X                                                                                                                 |   |      | 0    | 197  | 28  | 0  | 0  | 1.00 |      |      | 3    | 0  | 0  | 3  | 0  | 0  |   |
| IPI00123639.1  | P14211 | Calr          | Calreticulin                                                                     |                                                                                                                   | X | X    | 0    | 416  | 0   | 22 | 22 |      | 1.00 | 1.00 | 0    | 7  | 8  | 0  | 7  | 8  |   |
| IPI00135186.1  | O35887 | Calu          | Calumenin                                                                        | X                                                                                                                 |   |      | 0    | 315  | 51  | 0  | 0  | 1.00 |      |      | 14   | 0  | 0  | 12 | 0  | 0  |   |
| IPI00673777.2  | A2AHC3 | Camsap1       | Isoform 1 of Calmodulin-regulated spectrin-associated protein 1                  | X                                                                                                                 |   | 2DLC | 2    | 1581 | 3   | 0  | 0  | 1.00 |      |      | 3    | 0  | 0  | 3  | 0  | 0  |   |
| IPI00670928.3  |        | Camsap11      | calmodulin regulated spectrin-associated protein 1-like 1                        | X                                                                                                                 |   |      | 2    | 1478 | 2   | 0  | 0  | 0.99 |      |      | 2    | 0  | 0  | 2  | 0  | 0  |   |
| IPI00896727.1  | Q6ZQ38 | Cand1         | Cullin-associated NEDD8-dissociated protein 1                                    |                                                                                                                   | X | X    | 3    | 1230 | 0   | 15 | 13 |      | 1.00 | 1.00 | 0    | 12 | 10 | 0  | 12 | 10 |   |
| IPI00119618.1  | P35564 | Canx          | Calnexin                                                                         |                                                                                                                   | X | X    | 1    | 591  | 0   | 31 | 19 |      | 1.00 | 1.00 | 0    | 17 | 9  | 0  | 17 | 9  |   |
| IPI00869430.1  | Q8BPT7 | Cap1          | Adenylyl cyclase-associated protein                                              | X                                                                                                                 | X | X    | 0    | 474  | 8   | 15 | 16 | 1.00 | 1.00 | 1.00 | 2    | 4  | 5  | 2  | 4  | 5  |   |
| IPI00277930.6  | P24452 | Capg          | Macrophage-capping protein                                                       | X                                                                                                                 |   |      | 0    | 350  | 25  | 0  | 0  | 1.00 |      |      | 5    | 0  | 0  | 5  | 0  | 0  |   |
| IPI00757359.1  | Q60865 | Caprin1       | Caprin-1                                                                         | X                                                                                                                 | X | X    | 0    | 707  | 22  | 11 | 17 | 1.00 | 1.00 | 1.00 | 12   | 7  | 7  | 9  | 7  | 7  |   |
| IPI00330063.6  | P47753 | Capza1        | F-actin-capping protein subunit alpha-1                                          | X                                                                                                                 |   | X    | 0    | 286  | 29  | 0  | 9  | 1.00 |      | 0.99 | 5    | 0  | 2  | 5  | 0  | 2  |   |
| IPI00111265.3  | P47754 | Capza2        | F-actin-capping protein subunit alpha-2                                          | X                                                                                                                 | X | X    | 0    | 286  | 22  | 9  | 9  | 1.00 | 1.00 | 1.00 | 4    | 2  | 2  | 4  | 2  | 2  |   |
| IPI00474883.2  | A2AMV7 | Capzb         | Capping protein (Actin filament) muscle Z-line, beta                             |                                                                                                                   |   | X    | 0    | 301  | 0   | 0  | 11 |      | 1.00 |      | 0    | 0  | 2  | 0  | 0  | 2  |   |
| IPI00121534.11 | P00920 | Car2          | Carbonic anhydrase 2                                                             | X                                                                                                                 | X | X    | 1    | 260  | 16  | 15 | 20 | 1.00 | 1.00 | 1.00 | 2    | 3  | 3  | 2  | 3  | 3  |   |



|               |          |          |                                                       |   |   |     |      |     |    |    |      |      |      |      |    |    |    |    |    |    |
|---------------|----------|----------|-------------------------------------------------------|---|---|-----|------|-----|----|----|------|------|------|------|----|----|----|----|----|----|
| IPI00331422.4 | Q9ER72   | Cars     | CysteinyI-tRNA synthetase, cytoplasmic                | X |   | 1   | 831  | 3   | 0  | 0  | 1.00 |      | 2    | 0    | 0  | 2  | 0  | 0  |    |    |
| IPI00409176.1 | P51125   | Cast     | Calpastatin                                           | X |   | 0   | 788  | 17  | 0  | 0  | 1.00 |      | 8    | 0    | 0  | 7  | 0  | 0  |    |    |
| IPI00312058.5 | P24270   | Cat      | Catalase                                              | X |   | 1   | 527  | 9   | 0  | 0  | 1.00 |      | 4    | 0    | 0  | 3  | 0  | 0  |    |    |
| IPI00652341.1 | Q3U527   | Cbl      | Casitas B-lineage lymphoma                            | X |   | 0   | 913  | 2   | 0  | 0  | 0.98 |      | 2    | 0    | 0  | 2  | 0  | 0  |    |    |
| IPI00844721.1 | Q9JIY2   | Cbl1     | E3 ubiquitin-protein ligase Hakai                     | X |   | 0   | 491  | 6   | 0  | 0  | 0.99 |      | 2    | 0    | 0  | 2  | 0  | 0  |    |    |
| IPI00314191.6 | P48758   | Cbr1     | Carbonyl reductase [NADPH] 1                          | X |   | 0   | 277  | 22  | 0  | 0  | 1.00 |      | 3    | 0    | 0  | 3  | 0  | 0  |    |    |
| IPI00677454.2 | Q9DCC5   | Cbx3     | Chromobox homolog 3                                   | X | X | 0   | 183  | 24  | 39 | 0  | 1.00 | 1.00 | 8    | 4    | 0  | 5  | 4  | 0  |    |    |
| IPI00458723.2 | Q9D8X2   | Ccdc124  | Coiled-coil domain-containing protein 124             | X |   | 0   | 217  | 18  | 0  | 0  | 1.00 |      | 3    | 0    | 0  | 3  | 0  | 0  |    |    |
| IPI00122137.6 | Q8C9M2-2 | Ccdc15   | Coiled-coil domain-containing protein 15              | X |   | 0   | 823  | 5   | 0  | 0  | 1.00 |      | 2    | 0    | 0  | 2  | 0  | 0  |    |    |
| IPI00466468.2 | Q3UHY7   | Ccdc32   | coiled-coil domain containing 32                      | X |   | 0   | 179  | 21  | 0  | 0  | 1.00 |      | 2    | 0    | 0  | 2  | 0  | 0  |    |    |
| IPI00133032.5 | Q9CR29   | Ccdc43   | Coiled-coil domain-containing protein 43              | X |   | 0   | 222  | 6   | 0  | 0  | 1.00 |      | 2    | 0    | 0  | 2  | 0  | 0  |    |    |
| IPI00170090.5 | Q8C804   | Ccdc52   | Coiled-coil domain-containing protein 52              | X |   | 0   | 860  | 7   | 0  | 0  | 0.99 |      | 4    | 0    | 0  | 4  | 0  | 0  |    |    |
| IPI00381495.5 | Ccdc6    |          | coiled-coil domain containing 6                       | X |   | 0   | 469  | 18  | 0  | 0  | 1.00 |      | 6    | 0    | 0  | 6  | 0  | 0  |    |    |
| IPI00468895.2 | Q6NS45   | Ccdc66   | Coiled-coil domain-containing protein 66              | X |   | 0   | 935  | 5   | 0  | 0  | 1.00 |      | 3    | 0    | 0  | 3  | 0  | 0  |    |    |
| IPI00229261.5 | Q3UFS4   | Ccdc75   | Coiled-coil domain-containing protein 75              | X |   | 0   | 266  | 9   | 0  | 0  | 0.98 |      | 2    | 0    | 0  | 2  | 0  | 0  |    |    |
| IPI00378506.1 | Q8BYH3   | Ccdc76   | tRNA guanosine-2'-O-methyltransferase TRM13 homolog   |   | X | 0   | 481  | 0   | 0  | 13 | 0.99 |      | 0    | 0    | 3  | 0  | 0  | 3  |    |    |
| IPI00844630.1 | Q6VGS5-2 | Ccdc88c  | Protein Daple                                         |   | X | 1   | 2016 | 0   | 1  | 0  | 0.92 |      | 0    | 2    | 0  | 0  | 2  | 0  |    |    |
| IPI00123958.2 | Q923A2   | Ccdc99   | Protein Spindly                                       | X |   | 0   | 608  | 6   | 0  | 0  | 0.96 |      | 2    | 0    | 0  | 2  | 0  | 0  |    |    |
| IPI00111207.1 | P24860   | Ccnb1    | G2/mitotic-specific cyclin-B1                         |   | X | 2   | 430  | 0   | 0  | 11 | 1.00 |      | 0    | 0    | 3  | 0  | 0  | 3  |    |    |
| IPI00752728.2 | Q3UUW5   | Ccnh     | Putative uncharacterized protein                      | X |   | 1   | 327  | 7   | 0  | 0  | 1.00 |      | 3    | 0    | 0  | 2  | 0  | 0  |    |    |
| IPI00320217.9 | P80314   | Cct2     | T-complex protein 1 subunit beta                      | X | X | X   | 1    | 535 | 6  | 58 | 48   | 0.94 | 1.00 | 1.00 | 2  | 24 | 18 | 2  | 22 | 18 |
| IPI00116283.1 | P80318   | Cct3     | T-complex protein 1 subunit gamma                     | X | X | X   | 1    | 545 | 5  | 44 | 40   | 0.99 | 1.00 | 1.00 | 2  | 21 | 17 | 2  | 20 | 17 |
| IPI00116277.3 | P80315   | Cct4     | T-complex protein 1 subunit delta                     |   | X | X   | 1    | 539 | 0  | 51 | 37   | 1.00 | 1.00 | 0    | 22 | 17 | 0  | 21 | 16 |    |
| IPI00116279.3 | P80316   | Cct5     | T-complex protein 1 subunit epsilon                   | X | X | X   | 1    | 541 | 14 | 34 | 42   | 1.00 | 1.00 | 1.00 | 4  | 11 | 14 | 4  | 11 | 14 |
| IPI00116281.3 | P80317   | Cct6a    | T-complex protein 1 subunit zeta                      | X | X | X   | 2    | 531 | 15 | 38 | 39   | 1.00 | 1.00 | 1.00 | 5  | 16 | 16 | 5  | 16 | 16 |
| IPI00331174.5 | P80313   | Cct7     | T-complex protein 1 subunit eta                       |   | X | X   | 1    | 544 | 0  | 28 | 38   | 1.00 | 1.00 | 0    | 12 | 14 | 0  | 12 | 14 |    |
| IPI00469268.5 | P42932   | Cct8     | T-complex protein 1 subunit theta                     |   | X | X   | 1    | 548 | 0  | 51 | 45   | 1.00 | 1.00 | 0    | 25 | 21 | 0  | 25 | 20 |    |
| IPI00268688.3 | Q9JLQ0   | Cd2ap    | CD2-associated protein                                | X |   | 0   | 637  | 4   | 0  | 0  | 1.00 |      | 2    | 0    | 0  | 2  | 0  | 0  |    |    |
| IPI00109203.3 | Q9CWK3   | Cd2bp2   | CD2 antigen cytoplasmic tail-binding protein 2        | X |   | 0   | 342  | 6   | 0  | 0  | 1.00 |      | 2    | 0    | 0  | 2  | 0  | 0  |    |    |
| IPI00169700.4 | Q76KJ5   | Cd3eap   | DNA-directed RNA polymerase I subunit RPA34           | X | X | 0   | 399  | 15  | 0  | 15 | 1.00 | 1.00 | 4    | 0    | 3  | 4  | 0  | 3  |    |    |
| IPI00114491.1 | P11440   | Cdc2a    | Cell division control protein 2 homolog               | X | X | X   | 0    | 297 | 28 | 11 | 14   | 1.00 | 1.00 | 1.00 | 7  | 2  | 3  | 6  | 2  | 3  |
| IPI00117087.1 | Q61081   | Cdc37    | Hsp90 co-chaperone Cdc37                              | X |   | X   | 0    | 379 | 18 | 0  | 13   | 1.00 | 1.00 | 5    | 0  | 2  | 5  | 0  | 2  |    |
| IPI00113849.1 | P60766-2 | Cdc42    | Isoform 2 of Cell division control protein 42 homolog |   | X | 1DE | 0    | 191 | 0  | 12 | 0    | 1.00 |      | 0    | 2  | 0  | 0  | 2  | 0  |    |
| IPI00124906.1 | Q9JM96   | Cdc42ep4 | Cdc42 effector protein 4                              | X |   | 0   | 349  | 24  | 0  | 0  | 1.00 |      | 6    | 0    | 0  | 5  | 0  | 0  |    |    |
| IPI00284444.5 | Q6A068   | Cdc5l    | Cell division cycle 5-related protein                 | X |   | X   | 0    | 802 | 42 | 0  | 12   | 1.00 | 1.00 | 29   | 0  | 8  | 25 | 0  | 8  |    |
| IPI00170345.1 | Q8JZM7   | Cdc73    | Parafibromin                                          | X |   | X   | 0    | 531 | 19 | 0  | 7    | 1.00 | 1.00 | 9    | 0  | 3  | 8  | 0  | 3  |    |
| IPI00228728.5 | Q14B71   | Cdca2    | Cell division cycle-associated protein 2              | X |   | 0   | 982  | 3   | 0  | 0  | 0.99 |      | 2    | 0    | 0  | 2  | 0  | 0  |    |    |
| IPI00318626.1 | P09803   | Cdh1     | Cadherin-1                                            |   | X | 1   | 884  | 0   | 4  | 0  | 1.00 |      | 0    | 2    | 0  | 0  | 2  | 0  |    |    |
| IPI00468999.4 | Q99L43   | Cds2     | Phosphatidate cytidyltransferase 2                    |   | X | 8   | 444  | 0   | 8  | 0  | 1.00 |      | 0    | 2    | 0  | 0  | 2  | 0  |    |    |
| IPI00227808.3 | Q4VAA2   | Cdv3     | Protein CDV3                                          | X |   | X   | 2DL  | 281 | 13 | 0  | 19   | 1.00 | 1.00 | 3    | 0  | 3  | 3  | 0  | 3  |    |
| IPI00132346.2 | Q78Y72   | Ceacam14 | CEA-related cell adhesion molecule 14                 | X |   | 0   | 263  | 19  | 0  | 0  | 0.96 |      | 2    | 0    | 0  | 2  | 0  | 0  |    |    |
| IPI00356898.4 | Q569L8   | Cenpj    | Centromere protein J                                  | X |   | 0   | 1344 | 1   | 0  | 0  | 0.01 |      | 1    | 0    | 0  | 1  | 0  | 0  |    |    |
| IPI00225036.3 | Q3TJM4   | Cenpt    | Centromere protein T                                  | X |   | 0   | 515  | 9   | 0  | 0  | 1.00 |      | 2    | 0    | 0  | 2  | 0  | 0  |    |    |
| IPI00466518.2 | Q8BT07   | Cep55    | Centrosomal protein of 55 kDa                         | X |   | 0   | 462  | 9   | 0  | 0  | 0.98 |      | 2    | 0    | 0  | 2  | 0  | 0  |    |    |

|               |          |         |                                                                                |  |   |   |   |      |  |   |      |    |    |    |      |      |      |    |    |    |    |    |    |
|---------------|----------|---------|--------------------------------------------------------------------------------|--|---|---|---|------|--|---|------|----|----|----|------|------|------|----|----|----|----|----|----|
| IPI00128741.1 | Q9R1K9   | Cetn2   | Centrin-2                                                                      |  | X |   |   |      |  | 0 | 172  | 44 | 0  | 0  | 1.00 |      | 8    | 0  | 0  | 5  | 0  | 0  |    |
| IPI00114065.1 | P04186   | Cfb     | Complement factor B                                                            |  | X |   |   |      |  | 0 | 761  | 4  | 0  | 0  | 1.00 |      | 2    | 0  | 0  | 2  | 0  | 0  |    |
| IPI00890117.1 | P18760   | Cfl1    | Cofilin-1                                                                      |  | X | X | X |      |  | 0 | 166  | 60 | 58 | 48 | 1.00 | 1.00 | 1.00 | 14 | 12 | 7  | 12 | 12 | 7  |
| IPI00266188.6 | P45591   | Cfl2    | Cofilin-2                                                                      |  | X |   |   |      |  | 0 | 166  | 37 | 0  | 0  | 1.00 |      | 7    | 0  | 0  | 5  | 0  | 0  |    |
| IPI00133562.1 | Q9CRB9   | Chchd3  | Coiled-coil-helix-coiled-coil-helix domain-containing protein 3, mitochondrial |  |   | X |   |      |  | 0 | 227  | 0  | 8  | 0  | 1.00 |      | 0    | 2  | 0  | 0  | 2  | 0  |    |
| IPI00107999.1 | P40201   | Chd1    | Chromodomain-helicase-DNA-binding protein 1                                    |  |   | X |   |      |  | 0 | 1711 | 0  | 1  | 0  | 1.00 |      | 0    | 2  | 0  | 0  | 2  | 0  |    |
| IPI00857771.1 | Q6PDQ2   | Chd4    | Chromodomain-helicase-DNA-binding protein 4                                    |  | X | X | X |      |  | 2 | 1922 | 7  | 14 | 5  | 1.00 | 1.00 | 1.00 | 8  | 19 | 4  | 8  | 19 | 4  |
| IPI00345676.5 | A2AJK6   | Chd7    | Chromodomain-helicase-DNA-binding protein 7                                    |  |   | X |   |      |  | 4 | 2986 | 0  | 1  | 0  | 0.98 |      | 0    | 2  | 0  | 0  | 2  | 0  |    |
| IPI00119020.1 | Q9DB34   | Chmp2a  | Charged multivesicular body protein 2a                                         |  | X |   |   |      |  | 0 | 222  | 9  | 0  | 0  | 1.00 |      | 2    | 0  | 0  | 2  | 0  | 0  |    |
| IPI00134017.1 | Q9D1P4   | Chordc1 | Cysteine and histidine-rich domain-containing protein 1                        |  |   | X |   |      |  | 0 | 331  | 0  | 10 | 0  | 1.00 |      | 0    | 2  | 0  | 0  | 2  | 0  |    |
| IPI00187301.1 | Q8WTY4   | Ciapin1 | Anamorsin                                                                      |  | X | X |   |      |  | 0 | 309  | 0  | 17 | 14 | 1.00 | 1.00 | 0    | 3  | 3  | 0  | 3  | 3  |    |
| IPI00128346.1 | Q91WS0   | Cisd1   | CDGSH iron sulfur domain-containing protein 1                                  |  |   | X |   |      |  | 1 | 108  | 0  | 20 | 0  | 1.00 |      | 0    | 2  | 0  | 0  | 2  | 0  |    |
| IPI00470092.2 | Q3V1H1   | Ckap2   | Cytoskeleton-associated protein 2                                              |  |   |   | X |      |  | 0 | 664  | 0  | 0  | 5  | 1.00 | 1.00 | 0    | 0  | 2  | 0  | 0  | 2  |    |
| IPI00223047.2 | Q8BMK4   | Ckap4   | Cytoskeleton-associated protein 4                                              |  | X | X |   |      |  | 1 | 575  | 0  | 12 | 7  | 1.00 | 0.99 | 0    | 4  | 2  | 0  | 4  | 2  |    |
| IPI00337930.4 | A2AGT5   | Ckap5   | Cytoskeleton-associated protein 5                                              |  |   | X | X |      |  | 3 | 2032 | 0  | 5  | 3  | 1.00 | 0.98 | 0    | 7  | 2  | 0  | 7  | 2  |    |
| IPI00136703.1 | Q04447   | Ckb     | Creatine kinase B-type                                                         |  | X | X | X |      |  | 0 | 381  | 26 | 48 | 37 | 1.00 | 1.00 | 1.00 | 7  | 11 | 10 | 6  | 11 | 10 |
| IPI00415523.1 | Q9ET38   | Cldn19  | Claudin-19                                                                     |  |   |   | X |      |  | 3 | 224  | 0  | 0  | 25 |      | 0.99 | 0    | 0  | 3  | 0  | 0  | 2  |    |
| IPI00130344.3 | Q9Z1Q5   | Clic1   | Chloride intracellular channel protein 1                                       |  |   |   | X |      |  | 1 | 241  | 0  | 0  | 18 |      | 1.00 | 0    | 0  | 3  | 0  | 0  | 3  |    |
| IPI00135977.3 | Q9QYB1   | Clic4   | Chloride intracellular channel protein 4                                       |  |   | X |   |      |  | 1 | 253  | 0  | 9  | 0  | 1.00 |      | 0    | 2  | 0  | 0  | 2  | 0  |    |
| IPI00119808.1 | Q9JHS4   | Clpx    | ATP-dependent Clp protease ATP-binding subunit clpX-like, mitochondrial        |  | X |   |   |      |  | 0 | 634  | 4  | 0  | 0  | 1.00 |      | 2    | 0  | 0  | 2  | 0  | 0  |    |
| IPI00648173.1 | Q5SXR6   | Cltc    | Clathrin, heavy polypeptide                                                    |  |   | X | X |      |  | 1 | 1679 | 0  | 55 | 17 | 1.00 | 1.00 | 0    | 75 | 19 | 0  | 70 | 19 |    |
| IPI00330767.1 | P53996   | Cnbp    | Cellular nucleic acid-binding protein                                          |  |   |   | X |      |  | 0 | 178  | 0  | 0  | 20 |      | 1.00 | 0    | 0  | 3  | 0  | 0  | 3  |    |
| IPI00315879.1 | Q9D1A2   | Cndp2   | Cytosolic non-specific dipeptidase                                             |  | X | X |   |      |  | 0 | 475  | 11 | 0  | 15 | 1.00 | 1.00 | 4    | 0  | 4  | 3  | 0  | 4  |    |
| IPI00116649.1 | Q08093   | Cnn2    | Calponin-2                                                                     |  | X |   |   |      |  | 0 | 305  | 14 | 0  | 0  | 1.00 |      | 3    | 0  | 0  | 3  | 0  | 0  |    |
| IPI00119111.2 | Q9DAW9   | Cnn3    | Calponin-3                                                                     |  | X | X | X |      |  | 0 | 330  | 19 | 7  | 18 | 1.00 | 1.00 | 1.00 | 8  | 2  | 4  | 4  | 2  | 4  |
| IPI00880243.1 | Q6ZQ08-4 | Cnot1   | CCR4-NOT transcription complex subunit 1                                       |  |   | X |   |      |  | 9 | 2376 | 0  | 4  | 0  | 1.00 |      | 0    | 9  | 0  | 0  | 9  | 0  |    |
| IPI00221683.3 | Q8BH15   | Cnot10  | CCR4-NOT transcription complex subunit 10                                      |  | X | X |   |      |  | 2 | 744  | 1  | 3  | 0  | 0.00 | 0.97 | 1    | 2  | 0  | 1  | 2  | 0  |    |
| IPI00410930.3 | Q8BT14-3 | Cnot4   | CCR4-NOT transcription complex subunit 4                                       |  | X |   |   |      |  | 0 | 713  | 11 | 0  | 0  | 1.00 |      | 4    | 0  | 0  | 4  | 0  | 0  |    |
| IPI00319602.3 | P16330   | Cnp     | 2',3'-cyclic-nucleotide 3'-phosphodiesterase                                   |  |   |   | X |      |  | 0 | 420  | 0  | 0  | 5  |      | 0.99 | 0    | 0  | 2  | 0  | 0  | 2  |    |
| IPI00135512.1 | Q9QXT0   | Cnpy2   | Protein canopy homolog 2                                                       |  | X |   |   |      |  | 0 | 182  | 15 | 0  | 0  | 1.00 |      | 2    | 0  | 0  | 2  | 0  | 0  |    |
| IPI00875961.1 | Q8BQ47   | Cnpy4   | Protein canopy homolog 4                                                       |  | X |   |   |      |  | 0 | 245  | 21 | 0  | 0  | 1.00 |      | 6    | 0  | 0  | 6  | 0  | 0  |    |
| IPI00551146.5 | Q8CB62   | Cntrob  | Isoform 1 of Centrobilin                                                       |  | X |   |   | 2DLC |  | 0 | 887  | 5  | 0  | 0  | 1.00 |      | 3    | 0  | 0  | 3  | 0  | 0  |    |
| IPI00330247.4 | Q5NBX1   | Cobl    | Protein cordon-bleu                                                            |  | X |   |   |      |  | 0 | 1337 | 12 | 0  | 0  | 1.00 |      | 11   | 0  | 0  | 10 | 0  | 0  |    |
| IPI00762331.2 | Q3UMF0   | Cobl1   | Cordon-bleu protein-like 1                                                     |  | X |   |   |      |  | 0 | 1273 | 3  | 0  | 0  | 0.99 |      | 2    | 0  | 0  | 2  | 0  | 0  |    |
| IPI00129529.2 | Q9Z160   | Cog1    | Conserved oligomeric Golgi complex subunit 1                                   |  |   |   | X |      |  | 1 | 980  | 0  | 0  | 5  |      | 0.93 | 0    | 0  | 3  | 0  | 0  | 3  |    |
| IPI00626353.5 | Q9QZR9   | Col4a4  | Isoform 1 of Collagen alpha-4(IV) chain                                        |  |   |   | X | UF   |  | 1 | 1682 | 0  | 0  | 6  |      | 0.93 | 0    | 0  | 6  | 0  | 0  | 5  |    |
| IPI00229834.3 | Q8CIE6   | Copa    | Coatamer subunit alpha                                                         |  | X | X | X |      |  | 1 | 1224 | 9  | 9  | 5  | 1.00 | 1.00 | 1.00 | 9  | 7  | 5  | 8  | 7  | 5  |
| IPI00120503.1 | Q9JIF7   | Copb1   | Coatamer subunit beta                                                          |  |   | X |   |      |  | 4 | 953  | 0  | 11 | 0  | 1.00 |      | 0    | 9  | 0  | 0  | 9  | 0  |    |
| IPI00115097.1 | O55029   | Copb2   | Coatamer subunit beta'                                                         |  |   | X | X |      |  | 0 | 905  | 0  | 12 | 4  | 1.00 | 1.00 | 0    | 7  | 3  | 0  | 7  | 3  |    |
| IPI00223437.4 | Q8BP96   | Copg    | Putative uncharacterized protein                                               |  | X | X |   |      |  | 0 | 878  | 0  | 8  | 9  | 1.00 | 1.00 | 0    | 5  | 6  | 0  | 5  | 6  |    |
| IPI00316359.1 | Q9QXK3   | Copg2   | Coatamer subunit gamma-2                                                       |  |   | X |   |      |  | 0 | 871  | 0  | 4  | 0  | 0.99 |      | 0    | 2  | 0  | 0  | 2  | 0  |    |

|               |          |          |                                                           |  |  |   |   |      |    |      |    |    |    |  |      |      |      |    |    |   |    |    |   |
|---------------|----------|----------|-----------------------------------------------------------|--|--|---|---|------|----|------|----|----|----|--|------|------|------|----|----|---|----|----|---|
| IPI00131873.1 | Q88545   | Cops6    | COP9 signalosome complex subunit 6                        |  |  | X |   |      | 1  | 324  | 0  | 0  | 6  |  | 1.00 | 0    | 0    | 2  | 0  | 0 | 2  |    |   |
| IPI00124820.2 | Q9WUM4   | Coro1c   | Coronin-1C                                                |  |  | X | X |      | 1  | 474  | 0  | 10 | 16 |  | 1.00 | 1.00 | 0    | 4  | 6  | 0 | 4  | 6  |   |
| IPI00132575.3 | Q9CQI6   | Cotl1    | Coactosin-like protein                                    |  |  | X |   |      | 0  | 142  | 0  | 20 | 0  |  | 1.00 | 0    | 2    | 0  | 0  | 0 | 2  | 0  |   |
| IPI00131176.1 | P00405   | COX2     | Cytochrome c oxidase subunit 2                            |  |  | X |   |      | 2  | 227  | 0  | 23 | 0  |  | 1.00 | 0    | 6    | 0  | 0  | 0 | 4  | 0  |   |
| IPI00117978.1 | P19783   | Cox4i1   | Cytochrome c oxidase subunit 4 isoform 1, mitochondrial   |  |  | X |   |      | 1  | 169  | 0  | 36 | 0  |  | 1.00 | 0    | 6    | 0  | 0  | 0 | 5  | 0  |   |
| IPI00120719.4 | P12787   | Cox5a    | Cytochrome c oxidase subunit 5A, mitochondrial            |  |  | X | X |      | 0  | 146  | 0  | 42 | 17 |  | 1.00 | 1.00 | 0    | 7  | 3  | 0 | 6  | 3  |   |
| IPI00121443.1 | Q9DCW5   | Cox6a1   | Cytochrome c oxidase polypeptide VIa                      |  |  | X |   |      | 1  | 112  | 0  | 61 | 0  |  | 1.00 | 0    | 4    | 0  | 0  | 0 | 4  | 0  |   |
| IPI00225390.5 | P56391   | Cox6b1   | Cytochrome c oxidase subunit 6B1                          |  |  | X |   |      | 0  | 86   | 0  | 63 | 0  |  | 1.00 | 0    | 6    | 0  | 0  | 0 | 6  | 0  |   |
| IPI00114377.1 | P48771   | Cox7a2   | Cytochrome c oxidase polypeptide 7A2, mitochondrial       |  |  |   | X |      | 0  | 83   | 0  | 28 | 0  |  | 1.00 | 0    | 3    | 0  | 0  | 0 | 2  | 0  |   |
| IPI00605187.4 | Q61147   | Cp       | Ceruloplasmin                                             |  |  | X |   |      | 0  | 1086 | 3  | 0  | 0  |  | 1.00 |      | 4    | 0  | 0  | 2 | 0  | 0  |   |
| IPI00421085.1 | Q6NVF9   | Cpsf6    | Cleavage and polyadenylation specificity factor subunit 6 |  |  |   | X |      | 0  | 551  | 0  | 0  | 9  |  |      | 1.00 | 0    | 0  | 3  | 0 | 0  | 3  |   |
| IPI00130708.1 | O35427   | Crpc     | DNA-directed RNA polymerase III subunit RPC9              |  |  | X |   |      | 0  | 148  | 22 | 0  | 0  |  | 1.00 |      | 3    | 0  | 0  | 2 | 0  | 0  |   |
| IPI00119924.1 | Q01147   | Creb1    | Cyclic AMP-responsive element-binding protein 1           |  |  | X |   |      | 0  | 341  | 13 | 0  | 0  |  | 1.00 |      | 2    | 0  | 0  | 2 | 0  | 0  |   |
| IPI00111286.1 | Q9CYA0   | Crel2    | Cysteine-rich with EGF-like domain protein 2              |  |  | X |   |      | 0  | 350  | 15 | 0  | 0  |  | 1.00 |      | 2    | 0  | 0  | 2 | 0  | 0  |   |
| IPI00121319.1 | Q9DCT8   | Crip2    | Cysteine-rich protein 2                                   |  |  | X |   |      | 0  | 208  | 26 | 0  | 0  |  | 1.00 |      | 2    | 0  | 0  | 2 | 0  | 0  |   |
| IPI00307991.1 | Q64010   | Crk      | Isoform Crk-II of Proto-oncogene C-crk                    |  |  | X |   | 2DLC | 0  | 304  | 28 | 0  | 0  |  | 1.00 |      | 7    | 0  | 0  | 7 | 0  | 0  |   |
| IPI00113362.2 | P47941   | Crkl     | Crk-like protein                                          |  |  | X |   |      | 0  | 303  | 33 | 0  | 0  |  | 1.00 |      | 8    | 0  | 0  | 8 | 0  | 0  |   |
| IPI00338211.4 | Q9Z2L7   | Crif3    | Cytokine receptor-like factor 3                           |  |  |   | X |      | 0  | 442  | 0  | 0  | 13 |  |      | 1.00 | 0    | 0  | 2  | 0 | 0  | 2  |   |
| IPI00132376.3 | P63154   | Crnk1    | Crooked neck-like protein 1                               |  |  | X |   |      | 0  | 690  | 14 | 0  | 0  |  | 1.00 |      | 8    | 0  | 0  | 8 | 0  | 0  |   |
| IPI00113141.1 | Q9CZU6   | Cs       | Citrate synthase, mitochondrial                           |  |  |   | X | X    | 1  | 464  | 0  | 12 | 13 |  | 1.00 | 1.00 | 0    | 5  | 4  | 0 | 5  | 3  |   |
| IPI00330591.1 | Q9JKB3   | Csda     | Isoform 1 of DNA-binding protein A                        |  |  | X | X | X    | UF | 361  | 25 | 13 | 14 |  | 1.00 | 1.00 | 6    | 3  | 5  | 6 | 3  | 5  |   |
| IPI00338717.3 | Q80TP8   | Csde1    | MKIAA0885 protein (Fragment)                              |  |  | X |   | X    | 0  | 822  | 7  | 0  | 6  |  | 1.00 | 0.99 | 5    | 0  | 4  | 5 | 0  | 4  |   |
| IPI00112414.1 | Q9ERK4   | Cse1l    | Exportin-2                                                |  |  |   | X | X    | 5  | 971  | 0  | 26 | 25 |  | 1.00 | 1.00 | 0    | 15 | 18 | 0 | 15 | 18 |   |
| IPI00330729.4 | Q8BK63   | Csnk1a1  | Casein kinase I                                           |  |  | X |   |      | 0  | 337  | 7  | 0  | 0  |  | 0.97 |      | 2    | 0  | 0  | 2 | 0  | 0  |   |
| IPI00120162.1 | Q60737   | Csnk2a1  | Casein kinase II subunit alpha                            |  |  | X | X | X    | 0  | 391  | 19 | 4  | 7  |  | 1.00 | 1.00 | 1.00 | 5  | 2  | 2 | 5  | 2  | 2 |
| IPI00118795.1 | O54833   | Csnk2a2  | Casein kinase II subunit alpha'                           |  |  | X |   |      | 0  | 350  | 31 | 0  | 0  |  | 1.00 |      | 8    | 0  | 0  | 8 | 0  | 0  |   |
| IPI00357493.6 | B2RX88   | Cspp1    | centrosome and spindle pole associated protein 1          |  |  | X |   |      | 0  | 1197 | 11 | 0  | 0  |  | 1.00 |      | 8    | 0  | 0  | 8 | 0  | 0  |   |
| IPI00123891.3 | P97315   | Csrp1    | Cysteine and glycine-rich protein 1                       |  |  |   | X |      | 0  | 193  | 0  | 0  | 17 |  |      | 1.00 | 0    | 0  | 2  | 0 | 0  | 2  |   |
| IPI00125931.1 | Q62426   | Cstb     | Cystatin-B                                                |  |  |   | X |      | 0  | 98   | 0  | 0  | 33 |  |      | 1.00 | 0    | 0  | 2  | 0 | 0  | 2  |   |
| IPI00116747.1 | Q99LC2   | Cstf1    | Cleavage stimulation factor 50 kDa subunit                |  |  | X |   |      | 0  | 431  | 18 | 0  | 0  |  | 1.00 |      | 4    | 0  | 0  | 4 | 0  | 0  |   |
| IPI00467932.4 | Q8C7E9   | Cstf2t   | Cleavage stimulation factor 64 kDa subunit, tau variant   |  |  | X |   |      | 0  | 632  | 19 | 0  | 0  |  | 1.00 |      | 6    | 0  | 0  | 5 | 0  | 0  |   |
| IPI00116929.1 | Q99LI7   | Cstf3    | Cleavage stimulation factor 77 kDa subunit                |  |  |   | X | X    | 0  | 717  | 0  | 5  | 6  |  | 1.00 | 1.00 | 0    | 2  | 2  | 0 | 2  | 2  |   |
| IPI00856974.1 | P56546-2 | Ctbp2    | C-terminal-binding protein 2                              |  |  | X | X | X    | 1  | 988  | 3  | 10 | 4  |  | 1.00 | 1.00 | 1.00 | 2  | 6  | 3 | 2  | 6  | 3 |
| IPI00112963.1 | P26231   | Ctnna1   | Catenin alpha-1                                           |  |  |   | X | X    | 1  | 906  | 0  | 25 | 18 |  | 1.00 | 1.00 | 0    | 15 | 9  | 0 | 14 | 9  |   |
| IPI00119870.2 | Q61301   | Ctnna2   | Catenin alpha-2                                           |  |  |   | X |      | 1  | 953  | 0  | 0  | 4  |  |      | 0.94 | 0    | 0  | 3  | 0 | 0  | 3  |   |
| IPI00125899.1 | Q02248   | Ctnnb1   | Catenin beta-1                                            |  |  |   | X | X    | 1  | 781  | 0  | 21 | 12 |  | 1.00 | 1.00 | 0    | 11 | 5  | 0 | 11 | 5  |   |
| IPI00752108.1 | P30999   | Ctnnd1   | Catenin delta-1                                           |  |  | X | X | X    | 0  | 967  | 15 | 11 | 4  |  | 1.00 | 1.00 | 1.00 | 11 | 5  | 3 | 9  | 5  | 3 |
| IPI00111959.2 | P70698   | Ctps     | CTP synthase 1                                            |  |  | X | X | X    | 1  | 591  | 5  | 7  | 10 |  | 0.99 | 1.00 | 1.00 | 2  | 3  | 5 | 2  | 3  | 5 |
| IPI00624988.4 | Q3UGC2   | Cttn     | Cortactin                                                 |  |  | X |   |      | 0  | 546  | 5  | 0  | 0  |  | 1.00 |      | 2    | 0  | 0  | 2 | 0  | 0  |   |
| IPI00453812.3 | Q99LJ0   | Ctnbp2nl | CTTNBP2 N-terminal-like protein                           |  |  | X |   |      | 0  | 638  | 7  | 0  | 0  |  | 1.00 |      | 2    | 0  | 0  | 2 | 0  | 0  |   |
| IPI00124047.1 | Q9WTX6   | Cul1     | Cullin-1                                                  |  |  |   | X |      | 0  | 776  | 0  | 2  | 0  |  |      | 1.00 | 0    | 0  | 2  | 0 | 0  | 2  | 0 |
| IPI00467383.2 | Q9JLV5   | Cul3     | Cullin-3                                                  |  |  | X |   |      | 0  | 768  | 4  | 0  | 0  |  | 0.96 |      | 2    | 0  | 0  | 2 | 0  | 0  |   |
| IPI00224689.3 | A2A432   | Cul4b    | cullin 4B                                                 |  |  |   | X | X    | 2  | 970  | 0  | 7  | 7  |  |      | 1.00 | 1.00 | 0  | 5  | 5 | 0  | 5  | 5 |
| IPI00230113.5 | P56395   | Cyb5     | Cytochrome b5                                             |  |  | X |   |      | 0  | 134  | 0  | 19 | 0  |  | 0.99 |      | 0    | 2  | 0  | 0 | 2  | 0  |   |

|               |        |             |                                                                             |   |   |   |               |   |      |    |    |    |      |      |      |    |    |    |    |    |    |
|---------------|--------|-------------|-----------------------------------------------------------------------------|---|---|---|---------------|---|------|----|----|----|------|------|------|----|----|----|----|----|----|
| IPI00110885.2 | B0QZG1 | Cyb5r3      | Putative uncharacterized protein                                            |   | X | X |               | 1 | 313  | 0  | 6  | 12 |      | 1.00 | 1.00 | 0  | 2  | 2  | 0  | 2  | 2  |
| IPI00116850.3 | Q99LF4 | D10Wsu52e   | UPF0027 protein C22orf28 homolog                                            | X |   | X |               | 0 | 505  | 32 | 0  | 10 | 1.00 |      | 1.00 | 11 | 0  | 3  | 10 | 0  | 3  |
| IPI00222675.3 | Q8BK59 | D19Bwg1357e | D19Bwg1357e protein                                                         | X | X |   |               | 0 | 648  | 15 | 6  | 0  | 1.00 | 1.00 |      | 7  | 3  | 0  | 7  | 3  | 0  |
| IPI00109313.1 | Q9CWN7 | D1Bwg0212e  | Uncharacterized protein C2orf29 homolog                                     |   | X |   |               | 1 | 505  | 0  | 8  | 0  |      | 1.00 |      | 0  | 3  | 0  | 0  | 2  | 0  |
| IPI00468516.3 | Q6PGL7 | D6Wsu116e   | Isoform 1 of Protein FAM21                                                  | X |   |   | 2DLC          | 0 | 1334 | 13 | 0  | 0  | 1.00 |      |      | 10 | 0  | 0  | 10 | 0  | 0  |
| IPI00308852.4 | P98078 | Dab2        | Disabled homolog 2                                                          | X |   |   |               | 0 | 766  | 16 | 0  | 0  | 1.00 |      |      | 7  | 0  | 0  | 7  | 0  | 0  |
| IPI00109082.3 | P61804 | Dad1        | Dolichyl-diphosphooligosaccharide--protein glycosyltransferase subunit DAD1 |   | X |   |               | 1 | 113  | 0  | 27 | 0  |      | 1.00 |      | 0  | 3  | 0  | 0  | 3  | 0  |
| IPI00222457.2 | Q3U987 | Dars        | Isoform 1 of aspartyl-tRNA synthetase                                       | X | X | X | 2DLC, 1DE, UF | 0 | 501  | 9  | 20 | 10 | 1.00 | 1.00 | 1.00 | 3  | 8  | 5  | 3  | 8  | 5  |
| IPI00831695.1 | Q3UGB5 | Dazap1      | DAZ associated protein 1                                                    | X |   |   |               | 0 | 406  | 6  | 0  | 0  | 0.99 |      |      | 2  | 0  | 0  | 2  | 0  | 0  |
| IPI00222430.5 | Q4VWZ5 | Dbi         | Diazepam binding inhibitor                                                  | X |   | X |               | 0 | 135  | 19 | 0  | 13 | 0.99 |      | 0.99 | 3  | 0  | 2  | 3  | 0  | 2  |
| IPI00378015.1 | Q62418 | Dbnl        | Drebrin-like protein                                                        | X |   |   |               | 0 | 436  | 17 | 0  | 0  | 1.00 |      |      | 5  | 0  | 0  | 5  | 0  | 0  |
| IPI00890234.1 | Q3TMF5 | Dbt         | dihydrolipoamide branched chain transacylase E2                             |   |   | X |               | 2 | 482  | 0  | 0  | 9  |      | 1.00 |      | 0  | 0  | 2  | 0  | 0  | 2  |
| IPI00129701.6 | Q6PAC3 | Dcaf13      | WD repeat and SOF domain-containing protein 1                               | X |   |   |               | 0 | 445  | 7  | 0  | 0  | 1.00 |      |      | 3  | 0  | 0  | 2  | 0  | 0  |
| IPI00886236.1 | Q8BHC4 | Dckad       | Dephospho-CoA kinase domain-containing protein                              |   | X | X |               | 2 | 231  | 0  | 34 | 17 |      | 1.00 | 1.00 | 0  | 9  | 4  | 0  | 8  | 4  |
| IPI00331692.1 | Q8QZV3 | Dci         | dodecenoyl-Coenzyme A delta isomerase precursor                             |   |   | X |               | 1 | 289  | 0  | 0  | 8  |      | 1.00 |      | 0  | 0  | 2  | 0  | 0  | 2  |
| IPI00459280.2 | Q9DAR7 | Dcps        | Scavenger mRNA-decapping enzyme DcpS                                        | X |   |   |               | 0 | 338  | 20 | 0  | 0  | 1.00 |      |      | 4  | 0  | 0  | 4  | 0  | 0  |
| IPI00856500.2 | O08788 | Dctn1       | Dynactin subunit 1                                                          |   |   | X |               | 2 | 1239 | 0  | 0  | 7  |      | 1.00 |      | 0  | 0  | 4  | 0  | 0  | 4  |
| IPI00116112.3 | Q99KJ8 | Dctn2       | Dynactin subunit 2                                                          | X |   | X |               | 0 | 402  | 33 | 0  | 8  | 1.00 |      | 1.00 | 12 | 0  | 2  | 10 | 0  | 2  |
| IPI00109482.3 | Q9CWS0 | Ddah1       | N(G),N(G)-dimethylarginine dimethylaminohydrolase 1                         | X |   |   |               | 0 | 285  | 18 | 0  | 0  | 1.00 |      |      | 4  | 0  | 0  | 4  | 0  | 0  |
| IPI00316740.4 | Q3U1J4 | Ddb1        | DNA damage-binding protein 1                                                |   | X | X |               | 2 | 1140 | 0  | 15 | 4  |      | 1.00 | 1.00 | 0  | 13 | 5  | 0  | 13 | 5  |
| IPI00410819.3 | Q8C4P7 | Ddost       | Putative uncharacterized protein                                            |   | X | X |               | 1 | 441  | 0  | 14 | 8  |      | 1.00 | 1.00 | 0  | 4  | 3  | 0  | 4  | 3  |
| IPI00230034.5 | O35215 | Ddt         | D-dopachrome decarboxylase                                                  |   | X | X |               | 0 | 118  | 0  | 49 | 36 |      | 1.00 | 1.00 | 0  | 4  | 4  | 0  | 4  | 4  |
| IPI00127172.3 | Q91VR5 | Ddx1        | ATP-dependent RNA helicase DDX1                                             | X | X | X |               | 0 | 740  | 5  | 27 | 7  | 0.99 | 1.00 | 1.00 | 2  | 14 | 4  | 2  | 14 | 4  |
| IPI00896604.1 | Q80Y44 | Ddx10       | Probable ATP-dependent RNA helicase DDX10                                   | X |   |   |               | 0 | 875  | 8  | 0  | 0  | 1.00 |      |      | 5  | 0  | 0  | 5  | 0  | 0  |
| IPI00653307.1 | Q3U741 | Ddx17       | Isoform 1 of DEAD box polypeptide 17                                        | X | X | X | 2DLC, 1DE, UF | 0 | 652  | 7  | 17 | 13 | 1.00 | 0.99 | 0.93 | 4  | 10 | 7  | 4  | 10 | 7  |
| IPI00459381.2 | Q8K363 | Ddx18       | ATP-dependent RNA helicase DDX18                                            | X | X | X |               | 1 | 660  | 27 | 23 | 15 | 1.00 | 1.00 | 1.00 | 14 | 10 | 6  | 12 | 10 | 6  |
| IPI00227749.1 | Q8BZY3 | Ddx19b      | Putative uncharacterized protein                                            | X |   |   |               | 1 | 494  | 7  | 0  | 0  | 1.00 |      |      | 2  | 0  | 0  | 2  | 0  | 0  |
| IPI00652987.3 | Q3TVJ3 | Ddx21       | DEAD (Asp-Glu-Ala-Asp) box polypeptide 21                                   | X | X | X |               | 0 | 851  | 27 | 38 | 21 | 1.00 | 1.00 | 1.00 | 17 | 28 | 15 | 16 | 28 | 15 |
| IPI00123878.4 | Q8VDW0 | Ddx39       | Isoform 1 of ATP-dependent RNA helicase DDX39                               | X | X | X | 2DLC, 1DE, UF | 0 | 427  | 15 | 31 | 31 | 1.00 | 1.00 | 1.00 | 5  | 10 | 11 | 5  | 10 | 11 |
| IPI00230035.7 | Q62167 | Ddx3x       | ATP-dependent RNA helicase DDX3X                                            | X | X | X |               | 0 | 662  | 18 | 36 | 31 | 1.00 | 1.00 | 1.00 | 9  | 20 | 17 | 9  | 20 | 17 |
| IPI00329839.7 | Q810A7 | Ddx42       | Isoform 1 of ATP-dependent RNA helicase DDX42                               | X |   | X | 2DLC          | 0 | 929  | 8  | 0  | 9  | 1.00 |      | 0.92 | 5  | 0  | 4  | 5  | 0  | 4  |
| IPI00468896.7 | Q569Z5 | Ddx46       | Probable ATP-dependent RNA helicase DDX46                                   | X | X |   |               | 0 | 1032 | 14 | 2  | 0  | 1.00 | 0.99 |      | 11 | 2  | 0  | 11 | 2  | 0  |
| IPI00187240.1 | Q9CWX9 | Ddx47       | Probable ATP-dependent RNA helicase DDX47                                   |   | X |   |               | 1 | 455  | 0  | 6  | 0  |      | 1.00 |      | 0  | 2  | 0  | 0  | 2  | 0  |
| IPI00648763.1 | B1ARB9 | Ddx5        | DEAD (Asp-Glu-Ala-Asp) box polypeptide 5                                    | X | X | X |               | 0 | 183  | 35 | 40 | 51 | 1.00 | 1.00 | 1.00 | 3  | 5  | 6  | 3  | 5  | 6  |
| IPI00420363.2 | Q61656 | Ddx5        | Probable ATP-dependent RNA helicase DDX5                                    | X | X | X |               | 0 | 614  | 14 | 35 | 23 | 1.00 | 1.00 | 1.00 | 7  | 18 | 13 | 7  | 18 | 13 |
| IPI00117771.1 | Q99MJ9 | Ddx50       | ATP-dependent RNA helicase DDX50                                            | X |   |   |               | 0 | 734  | 5  | 0  | 0  | 1.00 |      |      | 2  | 0  | 0  | 2  | 0  | 0  |
| IPI00336965.1 | Q8K301 | Ddx52       | Probable ATP-dependent RNA helicase DDX52                                   | X |   |   |               | 1 | 598  | 11 | 0  | 0  | 1.00 |      |      | 3  | 0  | 0  | 3  | 0  | 0  |

|               |        |         |                                                                                                          |  |  |   |   |   |      |      |      |      |    |    |      |      |      |      |    |    |    |    |    |    |
|---------------|--------|---------|----------------------------------------------------------------------------------------------------------|--|--|---|---|---|------|------|------|------|----|----|------|------|------|------|----|----|----|----|----|----|
| IPI00109932.1 | P54823 | Ddx6    | Probable ATP-dependent RNA helicase DDX6                                                                 |  |  |   |   |   |      |      |      |      |    |    |      |      |      |      |    |    |    |    |    |    |
| IPI00227720.3 | Q7TNV0 | Dek     | Protein DEK                                                                                              |  |  | X | X |   |      | 0    | 483  | 0    | 12 | 13 |      | 1.00 | 1.00 | 0    | 4  | 4  | 0  | 4  | 4  |    |
| IPI00230263.4 | Q3UFM6 | Dgcr14  | DiGeorge syndrome critical region protein 14                                                             |  |  |   |   | X |      | 0    | 480  | 16   | 0  | 0  | 1.00 |      |      | 5    | 0  | 0  | 5  | 0  | 0  |    |
| IPI00230042.5 | P00375 | Dhfr    | Dihydrofolate reductase                                                                                  |  |  |   |   | X |      | 0    | 187  | 0    | 14 | 0  |      | 1.00 |      | 0    | 2  | 0  | 0  | 2  | 0  |    |
| IPI00756386.1 | A2ATU0 | Dhtkd1  | Probable 2-oxoglutarate dehydrogenase E1 component DHKTD1, mitochondrial                                 |  |  |   |   | X |      | 0    | 921  | 0    | 5  | 0  |      | 1.00 |      | 0    | 2  | 0  | 0  | 2  | 0  |    |
| IPI00128818.2 | Q35286 | Dhx15   | Putative pre-mRNA-splicing factor ATP-dependent RNA helicase DHX15                                       |  |  | X | X | X |      | 0    | 795  | 10   | 21 | 15 | 1.00 | 1.00 | 1.00 | 8    | 12 | 9  | 7  | 12 | 8  |    |
| IPI00410936.1 | Q6PGC1 | Dhx29   | ATP-dependent RNA helicase Dhx29                                                                         |  |  |   |   | X | X    | 3    | 1365 | 0    | 3  | 4  |      | 1.00 | 0.94 | 0    | 3  | 3  | 0  | 3  | 3  |    |
| IPI00351266.2 | Q8VHK9 | Dhx36   | Probable ATP-dependent RNA helicase DHX36                                                                |  |  |   |   | X |      | 2    | 1001 | 0    | 2  | 0  |      | 0.95 |      | 0    | 2  | 0  | 0  | 2  | 0  |    |
| IPI00339468.4 | O70133 | Dhx9    | Isoform 2 of ATP-dependent RNA helicase A                                                                |  |  |   |   | X | X    | 1DE  | 5    | 1384 | 0  | 25 | 17   |      | 1.00 | 1.00 | 0  | 28 | 17 | 0  | 26 | 16 |
| IPI00831596.1 | O08808 | Diap1   | Protein diaphanous homolog 1                                                                             |  |  |   |   | X |      | 0    | 1264 | 0    | 2  | 0  |      | 1.00 |      | 0    | 2  | 0  | 0  | 2  | 0  |    |
| IPI00227881.4 | Q8R418 | Dicer1  | Endoribonuclease Dicer                                                                                   |  |  |   |   | X |      | 1    | 1906 | 0    | 4  | 0  |      | 1.00 |      | 0    | 7  | 0  | 0  | 7  | 0  |    |
| IPI00453851.4 | Q8C9B9 | Dido1   | Isoform 1 of Death-inducer obliterator 1                                                                 |  |  | X |   |   | 2DLC | 0    | 2256 | 6    | 0  | 0  | 1.00 |      |      | 7    | 0  | 0  | 7  | 0  | 0  |    |
| IPI00132415.1 | Q9D0D4 | Dimt1   | Probable dimethyladenosine transferase                                                                   |  |  |   |   |   | X    | 1    | 313  | 0    | 0  | 13 |      |      | 0.99 | 0    | 0  | 3  | 0  | 0  | 3  |    |
| IPI00407764.6 | Q9CSH3 | Dis3    | Exosome complex exonuclease RRP44                                                                        |  |  | X |   |   |      | 0    | 958  | 3    | 0  | 0  | 1.00 |      |      | 2    | 0  | 0  | 2  | 0  | 0  |    |
| IPI00113635.7 | Q9ESX5 | Dkc1    | H/ACA ribonucleoprotein complex subunit 4                                                                |  |  |   |   | X |      | 2    | 509  | 0    | 0  | 20 |      |      | 1.00 | 0    | 0  | 6  | 0  | 0  | 6  |    |
| IPI00153660.4 | Q8BMF4 | Dlat    | Dihydrolipoyllysine-residue acetyltransferase component of pyruvate dehydrogenase complex, mitochondrial |  |  |   |   | X | X    | 2    | 642  | 0    | 13 | 5  |      | 1.00 | 1.00 | 0    | 5  | 2  | 0  | 5  | 2  |    |
| IPI00331564.2 | Q3TIE8 | Dld     | Dihydrolipoyl dehydrogenase                                                                              |  |  |   |   | X | X    | 2    | 510  | 0    | 7  | 6  |      | 1.00 | 1.00 | 0    | 2  | 2  | 0  | 2  | 2  |    |
| IPI00310862.6 | Q8K4R9 | Dlgap5  | Isoform 1 or 2 of Disks large-associated protein 5                                                       |  |  |   |   | X |      | 2DLC | 0    | 808  | 6  | 0  | 0    | 1.00 |      | 3    | 0  | 0  | 3  | 0  | 0  |    |
| IPI00317722.3 | Q9JI44 | Dmap1   | Isoform 1 of DNA methyltransferase 1-associated protein 1                                                |  |  | X |   |   | 2DLC | 0    | 468  | 11   | 0  | 0  | 0.99 |      |      | 2    | 0  | 0  | 2  | 0  | 0  |    |
| IPI00828253.1 | A2A9Z0 | Dmd     | dystrophin, muscular dystrophy                                                                           |  |  |   |   |   | X    | X    | 1    | 3678 | 0  | 1  | 3    |      | 0.96 | 0.99 | 0  | 5  | 6  | 0  | 5  | 6  |
| IPI00674554.2 | Q6PNC0 | Dmnl1   | Dmx-like 1                                                                                               |  |  | X |   |   |      | 3    | 3025 | 1    | 0  | 0  | 0.99 |      |      | 2    | 0  | 0  | 2  | 0  | 0  |    |
| IPI00273742.3 | Q8R584 | Dnahc1  | Putative uncharacterized protein                                                                         |  |  |   |   |   | X    | 10   | 4308 | 0    | 0  | 3  |      |      | 0.96 | 0    | 0  | 6  | 0  | 0  | 6  |    |
| IPI00849953.1 | O08825 | Dnahc10 | dynein, axonemal, heavy chain 10                                                                         |  |  |   |   |   | X    | 6    | 4591 | 0    | 0  | 2  |      |      | 0.99 | 0    | 0  | 6  | 0  | 0  | 6  |    |
| IPI00116310.7 | P0C6F1 | Dnahc2  | dynein, axonemal, heavy chain 2                                                                          |  |  |   |   |   | X    | 11   | 4462 | 0    | 0  | 1  |      |      | 0.90 | 0    | 0  | 2  | 0  | 0  | 2  |    |
| IPI00172328.3 | Q91XQ0 | Dnahc8  | Dynein heavy chain 8, axonemal                                                                           |  |  |   |   |   | X    | 9    | 4731 | 0    | 0  | 2  |      |      | 1.00 | 0    | 0  | 6  | 0  | 0  | 6  |    |
| IPI00132208.1 | P63037 | Dnaja1  | DnaJ homolog subfamily A member 1                                                                        |  |  | X | X |   |      | 0    | 397  | 21   | 15 | 0  | 1.00 | 1.00 |      | 5    | 4  | 0  | 5  | 4  | 0  |    |
| IPI00136251.1 | Q9QYJ0 | Dnaja2  | DnaJ homolog subfamily A member 2                                                                        |  |  | X | X | X |      | 1    | 412  | 31   | 11 | 17 | 1.00 | 1.00 | 1.00 | 8    | 3  | 4  | 8  | 3  | 4  |    |
| IPI00136253.3 | Q9QYJ3 | Dnaja1  | DnaJ homolog subfamily B member 1                                                                        |  |  | X |   |   |      | 0    | 340  | 12   | 0  | 0  | 1.00 |      |      | 3    | 0  | 0  | 3  | 0  | 0  |    |
| IPI00320241.1 | Q99KV1 | Dnaja11 | DnaJ homolog subfamily B member 11                                                                       |  |  | X |   |   |      | 0    | 358  | 13   | 0  | 0  | 1.00 |      |      | 3    | 0  | 0  | 3  | 0  | 0  |    |
| IPI00666885.2 | Q8CHD7 | Dnaja13 | MKIAA0678 protein                                                                                        |  |  |   |   | X |      | 4    | 966  | 0    | 4  | 0  |      | 1.00 |      | 0    | 3  | 0  | 0  | 3  | 0  |    |
| IPI00128371.1 | Q91WT4 | Dnaja17 | DnaJ homolog subfamily C member 17                                                                       |  |  | X |   |   |      | 0    | 303  | 16   | 0  | 0  | 1.00 |      |      | 3    | 0  | 0  | 3  | 0  | 0  |    |
| IPI00126317.1 | P54103 | Dnaja2  | DnaJ homolog subfamily C member 2                                                                        |  |  | X | X | X |      | 0    | 621  | 13   | 5  | 5  | 1.00 | 1.00 | 1.00 | 5    | 2  | 3  | 5  | 2  | 3  |    |
| IPI00755714.3 | Q3URP7 | Dnaja21 | DnaJ (Hsp40) homolog, subfamily C, member 21                                                             |  |  | X |   |   |      | 0    | 531  | 10   | 0  | 0  | 1.00 |      |      | 4    | 0  | 0  | 4  | 0  | 0  |    |
| IPI00331385.2 | Q9QYI3 | Dnaja7  | DnaJ homolog subfamily C member 7                                                                        |  |  |   |   | X |      | 0    | 494  | 0    | 3  | 0  |      | 1.00 |      | 0    | 2  | 0  | 0  | 2  | 0  |    |
| IPI00463344.5 | Q6NZB0 | Dnaja8  | DnaJ homolog subfamily C member 8                                                                        |  |  | X |   |   |      | 0    | 293  | 26   | 0  | 0  | 1.00 |      |      | 8    | 0  | 0  | 8  | 0  | 0  |    |
| IPI00556723.1 | Q8K1M6 | Dnm1    | Dynamin-1-like protein                                                                                   |  |  |   |   |   | X    | 1    | 742  | 0    | 0  | 12 |      |      | 1.00 | 0    | 0  | 5  | 0  | 0  | 5  |    |
| IPI00131445.2 | P39054 | Dnm2    | Dynamin-2                                                                                                |  |  | X |   |   |      | 0    | 870  | 2    | 0  | 0  | 0.98 |      |      | 2    | 0  | 0  | 2  | 0  | 0  |    |
| IPI00469323.1 | Q7TSJ0 | Dnmt1   | Cytosine-specific methyltransferase                                                                      |  |  | X | X | X |      | 0    | 1627 | 3    | 10 | 2  | 1.00 | 1.00 | 1.00 | 4    | 12 | 3  | 3  | 12 | 3  |    |
| IPI00131694.5 | O88508 | Dnmt3a  | DNA (cytosine-5)-methyltransferase 3A                                                                    |  |  | X | X |   |      | 1    | 908  | 0    | 5  | 7  |      | 1.00 | 1.00 | 0    | 6  | 3  | 0  | 6  | 3  |    |
| IPI00757806.1 | Q3KR45 | Dnmt3b  | DNA methyltransferase 3B                                                                                 |  |  | X |   |   |      | 0    | 860  | 0    | 7  | 0  |      | 1.00 |      | 0    | 4  | 0  | 0  | 4  | 0  |    |

|               |          |          |                                                            |  |   |   |      |    |      |    |    |    |      |      |      |    |    |    |    |    |    |
|---------------|----------|----------|------------------------------------------------------------|--|---|---|------|----|------|----|----|----|------|------|------|----|----|----|----|----|----|
| IPI00109459.1 | Q9CWR8   | Dnmt3l   | DNA (cytosine-5)-methyltransferase 3-like                  |  | X |   |      | 1  | 421  | 0  | 8  | 0  | 1.00 | 0    | 3    | 0  | 0  | 3  | 0  |    |    |
| IPI00331394.3 | Q3TVK3   | Dnpep    | aspartyl aminopeptidase                                    |  |   | X |      | 0  | 475  | 0  | 0  | 15 | 1.00 | 0    | 0    | 3  | 0  | 0  | 3  |    |    |
| IPI00222462.4 | Q8VDR9   | Dock6    | dedicator of cytokinesis 6                                 |  | X |   |      | 6  | 2111 | 1  | 0  | 0  | 0.96 | 2    | 0    | 0  | 2  | 0  | 0  |    |    |
| IPI00882020.1 | Q61103   | Dpf2     | Zinc finger protein ubi-d4 (Requiem)                       |  | X |   |      | 0  | 405  | 28 | 0  | 0  | 1.00 | 8    | 0    | 0  | 8  | 0  | 0  |    |    |
| IPI00116134.1 | Q99KK7   | Dpp3     | Dipeptidyl-peptidase 3                                     |  |   | X |      | 1  | 738  | 0  | 8  | 0  | 1.00 | 0    | 3    | 0  | 0  | 3  | 0  |    |    |
| IPI00173116.2 | Q9CQS7   | Dppa5a   | Developmental pluripotency-associated protein 5A           |  | X | X |      | 0  | 118  | 46 | 33 | 0  | 1.00 | 1.00 | 5    | 2  | 0  | 3  | 2  | 0  |    |
| IPI00117168.3 | Q99LT0   | Dpy30    | Protein dpy-30 homolog                                     |  | X | X | X    | 0  | 99   | 36 | 36 | 45 | 1.00 | 1.00 | 1.00 | 2  | 2  | 3  | 2  | 2  | 3  |
| IPI00263313.1 | P32233   | Drg1     | Developmentally-regulated GTP-binding protein 1            |  | X | X | X    | 1  | 367  | 18 | 7  | 15 | 1.00 | 1.00 | 1.00 | 5  | 2  | 3  | 5  | 2  | 3  |
| IPI00134820.1 | Q9QXB9   | Drg2     | Developmentally-regulated GTP-binding protein 2            |  | X |   | X    | 0  | 364  | 9  | 0  | 9  | 0.99 | 0.99 | 2    | 0  | 2  | 2  | 0  | 2  |    |
| IPI00553419.3 |          | Dsp      | desmoplakin                                                |  | X |   | X    | 0  | 2883 | 8  | 0  | 2  | 1.00 | 0.99 | 16   | 0  | 4  | 15 | 0  | 4  |    |
| IPI00230692.1 | Q91ZU6-4 | Dst      | Bullous pemphigoid antigen 1                               |  | X | X | X    | 3  | 7402 | 1  | 1  | 1  | 0.92 | 0.99 | 0.92 | 3  | 3  | 6  | 3  | 3  | 6  |
| IPI00127942.4 | Q9ROP5   | Dstn     | Destrin                                                    |  | X | X | X    | 0  | 165  | 44 | 56 | 30 | 1.00 | 1.00 | 1.00 | 8  | 10 | 4  | 7  | 9  | 4  |
| IPI00896629.1 | P97930   | Dtymk    | Thymidylate kinase                                         |  | X | X |      | 0  | 227  | 7  | 15 | 0  | 0.97 | 1.00 | 2    | 3  | 0  | 2  | 3  | 0  |    |
| IPI00129184.3 | Q91X11   | Dus3l    | Isoform 1 of tRNA-dihydrouridine synthase 3-like           |  | X |   | 2DLC | 1  | 637  | 10 | 0  | 0  | 0.99 |      | 3    | 0  | 0  | 3  | 0  | 0  |    |
| IPI00380332.4 | Q7TNL7   | Dusp9    | Dual specificity phosphatase 9                             |  |   | X |      | 0  | 452  | 0  | 0  | 11 |      | 0.93 | 0    | 0  | 2  | 0  | 0  | 2  |    |
| IPI00187434.1 | Q8VCG1   | Dut      | Isoform 1 of Deoxyuridine triphosphatase                   |  | X | X | 1DE  | 0  | 200  | 32 | 28 | 0  | 1.00 | 1.00 | 4    | 5  | 0  | 4  | 5  | 0  |    |
| IPI00828867.2 | A2AX52   | Dvwa     | Collagen alpha-4(VI) chain                                 |  |   | X |      | 3  | 2309 | 0  | 2  | 0  | 0.97 |      | 0    | 2  | 0  | 0  | 2  | 0  |    |
| IPI00119876.1 | Q9JHU4   | Dync1h1  | Cytoplasmic dynein 1 heavy chain 1                         |  | X | X |      | 3  | 4644 | 0  | 13 | 5  | 1.00 | 1.00 | 0    | 47 | 13 | 0  | 46 | 13 |    |
| IPI00776018.1 | A2BFF9   | Dync1i2  | Dynein cytoplasmic 1 intermediate chain 2                  |  | X |   |      | 0  | 638  | 9  | 0  | 0  | 1.00 |      | 4    | 0  | 0  | 4  | 0  | 0  |    |
| IPI00153421.1 | Q8R1Q8   | Dync1li1 | Cytoplasmic dynein 1 light intermediate chain 1            |  | X |   |      | 0  | 523  | 7  | 0  | 0  | 0.99 |      | 2    | 0  | 0  | 2  | 0  | 0  |    |
| IPI00132734.1 | Q9D0M5   | Dynll2   | Dynein light chain 2, cytoplasmic                          |  |   | X |      | 0  | 89   | 0  | 20 | 0  | 0.95 |      | 0    | 2  | 0  | 0  | 2  | 0  |    |
| IPI00111829.1 | Q9D903   | Ebna1bp2 | Probable rRNA-processing protein EBP2                      |  | X |   | X    | 0  | 306  | 23 | 0  | 8  | 1.00 | 1.00 | 4    | 0  | 2  | 4  | 0  | 2  |    |
| IPI00454049.4 | Q8BH95   | Echs1    | Enoyl-CoA hydratase, mitochondrial                         |  |   | X |      | 0  | 290  | 0  | 19 | 0  | 1.00 |      | 0    | 3  | 0  | 0  | 3  | 0  |    |
| IPI00117049.1 | O54693   | Eda      | Ectodysplasin-A                                            |  |   | X |      | 0  | 391  | 0  | 0  | 5  |      | 0.94 | 0    | 0  | 2  | 0  | 0  | 2  |    |
| IPI00330066.5 | Q3UJB9   | Edc4     | Enhancer of mRNA-decapping protein 4                       |  |   | X | X    | 2  | 1406 | 0  | 4  | 4  | 1.00 | 1.00 | 0    | 4  | 3  | 0  | 4  | 3  |    |
| IPI00471325.2 | Q9JMG1   | Edf1     | Endothelial differentiation-related factor 1               |  | X |   |      | 0  | 148  | 30 | 0  | 0  | 1.00 |      | 4    | 0  | 0  | 4  | 0  | 0  |    |
| IPI00900431.1 | Q921E6-2 | Eed      | Isoform 2 of Polycomb protein EED                          |  |   |   | X    | UF | 500  | 0  | 0  | 5  |      | 1.00 | 0    | 0  | 2  | 0  | 0  | 2  |    |
| IPI00307837.6 | P10126   | Eef1a1   | Elongation factor 1-alpha 1                                |  | X | X | X    | 1  | 462  | 58 | 55 | 51 | 1.00 | 1.00 | 35   | 23 | 25 | 26 | 20 | 22 |    |
| IPI00119667.1 | P62631   | Eef1a2   | Elongation factor 1-alpha 2                                |  | X |   |      | 1  | 463  | 33 | 0  | 0  | 0.96 |      | 17   | 0  | 0  | 14 | 0  | 0  |    |
| IPI00320208.3 | O70251   | Eef1b2   | Elongation factor 1-beta                                   |  | X | X | X    | 0  | 225  | 28 | 27 | 46 | 1.00 | 1.00 | 1.00 | 5  | 3  | 9  | 4  | 3  | 9  |
| IPI00620302.3 | P57776-2 | Eef1d    | Elongation factor 1-delta                                  |  | X | X | X    | 0  | 257  | 25 | 0  | 0  | 1.00 |      | 6    | 0  | 0  | 6  | 0  | 0  |    |
| IPI00133928.1 | Q9D1M4   | Eef1e1   | Eukaryotic translation elongation factor 1 epsilon-1       |  | X | X | X    | 0  | 174  | 21 | 12 | 32 | 0.90 | 1.00 | 3    | 2  | 4  | 2  | 2  | 4  |    |
| IPI00318841.4 | Q9D8N0   | Eef1g    | Elongation factor 1-gamma                                  |  | X | X | X    | 0  | 437  | 0  | 40 | 35 |      | 1.00 | 1.00 | 0  | 18 | 15 | 0  | 18 | 15 |
| IPI00466069.3 | P58252   | Eef2     | Elongation factor 2                                        |  | X | X | X    | 0  | 858  | 9  | 56 | 54 | 0.97 | 1.00 | 1.00 | 4  | 41 | 38 | 4  | 38 | 37 |
| IPI00226872.1 | Q8C845   | Efhf2    | Putative uncharacterized protein                           |  | X |   |      | 0  | 240  | 15 | 0  | 0  | 1.00 |      | 3    | 0  | 0  | 3  | 0  | 0  |    |
| IPI00649950.3 | A2AH85   | Eftud2   | Elongation factor Tu GTP binding domain containing 2       |  |   | X | X    | 1  | 972  | 0  | 13 | 18 |      | 1.00 | 1.00 | 0  | 10 | 12 | 0  | 10 | 12 |
| IPI00845795.1 | Q69ZW3   | Ehbp1    | EH domain-binding protein 1                                |  | X |   |      | 0  | 1231 | 1  | 0  | 0  | 1.00 |      | 2    | 0  | 0  | 2  | 0  | 0  |    |
| IPI00126083.3 | Q9VWK4   | Ehd1     | EH domain-containing protein 1                             |  |   |   | X    | 0  | 534  | 0  | 0  | 9  |      | 1.00 | 0    | 0  | 4  | 0  | 0  | 4  |    |
| IPI00318671.2 | Q1MWP8   | Ehd4     | EH-domain containing 4-KJR (Fragment)                      |  | X |   |      | 0  | 544  | 7  | 0  | 0  | 1.00 |      | 3    | 0  | 0  | 3  | 0  | 0  |    |
| IPI00153608.3 | Q60872   | Eif1a    | Eukaryotic translation initiation factor 1A                |  |   | X |      | 0  | 144  | 0  | 28 | 0  | 0.99 |      | 0    | 4  | 0  | 0  | 4  | 0  |    |
| IPI00308984.6 | Q8BMJ3   | Eif1ay   | Eukaryotic translation initiation factor 1A, X-chromosomal |  |   | X |      | 0  | 144  | 0  | 28 | 0  | 1.00 |      | 0    | 4  | 0  | 0  | 4  | 0  |    |

|               |          |        |                                                                   |   |   |   |   |          |     |      |    |    |      |      |      |      |    |    |    |    |    |    |
|---------------|----------|--------|-------------------------------------------------------------------|---|---|---|---|----------|-----|------|----|----|------|------|------|------|----|----|----|----|----|----|
| IPI00318464.2 | Q9CXU9   | Eif1b  | Eukaryotic translation initiation factor 1b                       | X |   | X |   | 0        | 113 | 59   | 0  | 27 | 1.00 |      | 1.00 | 4    | 0  | 2  | 4  | 0  | 2  |    |
| IPI00119806.6 | Q8BJW6   | Eif2a  | Isoform 1 of Eukaryotic translation initiation factor 2A          |   |   | X |   | 1DE      | 0   | 581  | 0  | 24 | 0    | 1.00 |      | 0    | 10 | 0  | 0  | 10 | 0  |    |
| IPI00474446.4 | Q6ZWX6   | Eif2s1 | Eukaryotic translation initiation factor 2 subunit 1              | X | X | X |   |          | 0   | 315  | 26 | 35 | 21   | 1.00 | 1.00 | 1.00 | 7  | 8  | 6  | 5  | 8  | 6  |
| IPI00116302.3 | Q99L45   | Eif2s2 | Eukaryotic translation initiation factor 2 subunit 2              | X |   | X |   |          | 0   | 331  | 47 | 0  | 21   | 1.00 |      | 1.00 | 19 | 0  | 7  | 17 | 0  | 7  |
| IPI00129276.1 | P23116   | Eif3a  | p162 protein                                                      | X | X | X |   |          | 0   | 1344 | 2  | 10 | 15   | 1.00 | 1.00 | 1.00 | 2  | 13 | 19 | 2  | 13 | 19 |
| IPI00229859.1 | Q8CIJ3   | Eif3b  | Eif3b protein                                                     |   |   | X | X |          | 1   | 970  | 0  | 21 | 7    |      | 1.00 | 1.00 | 0  | 13 | 6  | 0  | 13 | 6  |
| IPI00321647.2 | Q8R1B4   | Eif3c  | Eukaryotic translation initiation factor 3 subunit C              |   |   | X | X |          | 2   | 911  | 0  | 11 | 13   |      | 1.00 | 1.00 | 0  | 10 | 9  | 0  | 10 | 9  |
| IPI00762774.2 | O70194   | Eif3d  | Eukaryotic translation initiation factor 3 subunit D              |   |   | X |   |          | 0   | 548  | 0  | 13 | 0    |      | 1.00 |      | 0  | 5  | 0  | 0  | 5  | 0  |
| IPI00132250.1 | P60229   | Eif3e  | Eukaryotic translation initiation factor 3 subunit E              |   |   | X | X |          | 0   | 445  | 0  | 14 | 15   |      | 1.00 | 1.00 | 0  | 5  | 6  | 0  | 5  | 6  |
| IPI00120914.1 | Q9DCH4   | Eif3f  | Eukaryotic translation initiation factor 3 subunit F              |   |   | X | X |          | 0   | 361  | 0  | 20 | 19   |      | 1.00 | 1.00 | 0  | 5  | 5  | 0  | 5  | 5  |
| IPI00622371.3 | Q9Z1D1   | Eif3g  | Eukaryotic translation initiation factor 3 subunit G              | X | X | X |   |          | 0   | 320  | 36 | 7  | 15   | 1.00 | 1.00 | 1.00 | 9  | 2  | 3  | 9  | 2  | 3  |
| IPI00128202.1 | Q91WK2   | Eif3h  | Eukaryotic translation initiation factor 3 subunit H              |   |   | X | X |          | 0   | 352  | 0  | 14 | 15   |      | 1.00 | 1.00 | 0  | 4  | 4  | 0  | 4  | 4  |
| IPI00269613.6 | Q9QZD9   | Eif3i  | Eukaryotic translation initiation factor 3 subunit I              | X | X | X |   |          | 0   | 325  | 26 | 14 | 17   | 1.00 | 1.00 | 1.00 | 6  | 4  | 3  | 6  | 4  | 3  |
| IPI00120322.1 | Q9DBZ5   | Eif3k  | Isoform 1 of Eukaryotic translation initiation factor 3 subunit K |   |   | X | X | 1DE, UF  | 0   | 218  | 0  | 13 | 18   |      | 1.00 | 1.00 | 0  | 2  | 3  | 0  | 2  | 3  |
| IPI00463573.3 | Q8QZY1   | Eif3l  | Eukaryotic translation initiation factor 3 subunit L              | X | X | X |   |          | 1   | 564  | 6  | 23 | 7    | 1.00 | 1.00 | 1.00 | 2  | 10 | 4  | 2  | 10 | 4  |
| IPI00115580.4 | Q99JX4   | Eif3m  | Eukaryotic translation initiation factor 3 subunit M              |   |   | X | X |          | 1   | 374  | 0  | 17 | 15   |      | 1.00 | 1.00 | 0  | 3  | 4  | 0  | 3  | 4  |
| IPI00118676.3 | P60843   | Eif4a1 | Eukaryotic initiation factor 4A-I                                 | X | X | X |   |          | 0   | 406  | 4  | 57 | 55   | 0.96 | 1.00 | 1.00 | 1  | 23 | 18 | 1  | 20 | 18 |
| IPI00409918.1 | P10630-2 | Eif4a2 | Eukaryotic initiation factor 4A-II                                | X | X | X |   |          | 0   | 408  | 4  | 30 | 32   | 0.96 | 0.91 | 0.97 | 1  | 12 | 12 | 1  | 12 | 12 |
| IPI00221581.1 | Q8BGD9   | Eif4b  | Eukaryotic translation initiation factor 4B                       | X | X | X |   |          | 0   | 611  | 14 | 11 | 17   | 1.00 | 1.00 | 1.00 | 4  | 3  | 6  | 4  | 3  | 6  |
| IPI00421179.1 | Q6NZJ6   | Eif4g1 | Isoform 1 of Eukaryotic translation initiation factor 4 gamma 1   |   |   | X | X | 1DE      | 1   | 1600 | 0  | 9  | 11   |      | 1.00 | 1.00 | 0  | 10 | 12 | 0  | 10 | 12 |
| IPI00126006.6 | Q62448   | Eif4g2 | Isoform 1 of Eukaryotic translation initiation factor 4 gamma 2   |   |   |   | X | UF       | 1   | 906  | 0  | 0  | 7    |      |      | 1.00 | 0  | 0  | 4  | 0  | 0  | 4  |
| IPI00124742.3 | Q9WUK2   | Eif4h  | Eukaryotic translation initiation factor 4H                       | X | X | X |   |          | 0   | 248  | 25 | 17 | 23   | 1.00 | 1.00 | 1.00 | 4  | 2  | 3  | 4  | 2  | 3  |
| IPI00108125.4 | P63242   | Eif5a  | Eukaryotic translation initiation factor 5A-1                     | X | X | X |   |          | 0   | 154  | 23 | 68 | 60   | 1.00 | 1.00 | 1.00 | 3  | 11 | 7  | 3  | 10 | 7  |
| IPI00756424.3 | Q05D44   | Eif5b  | Isoform 1 of Eukaryotic translation initiation factor 5B          | X |   |   | X | 2DLC, UF | 2   | 1216 | 4  | 0  | 10   | 0.99 |      | 1.00 | 3  | 0  | 7  | 3  | 0  | 7  |
| IPI00115862.1 | O55135   | Eif6   | Eukaryotic translation initiation factor 6                        |   |   | X | X |          | 0   | 245  | 0  | 18 | 19   |      | 0.98 | 1.00 | 0  | 2  | 2  | 0  | 2  | 2  |
| IPI00400401.1 | Q80Y81   | Elac2  | Zinc phosphodiesterase ELAC protein 2                             | X |   | X |   |          | 0   | 831  | 4  | 0  | 9    | 1.00 |      | 1.00 | 2  | 0  | 5  | 2  | 0  | 5  |
| IPI00466032.3 | Q78QY3   | Elavl1 | ELAV (embryonic lethal, abnormal vision, Drosophila)-like 1       | X | X | X |   |          | 0   | 326  | 20 | 12 | 20   | 1.00 | 1.00 | 1.00 | 7  | 4  | 6  | 6  | 4  | 6  |
| IPI00123165.5 | Q3UKU1   | Eli2   | RNA polymerase II elongation factor ELL2                          | X |   |   |   |          | 0   | 639  | 3  | 0  | 0    | 1.00 |      |      | 2  | 0  | 0  | 2  | 0  | 0  |
| IPI00224682.2 | Q9CZX0-2 | Elp3   | Elongator complex protein 3                                       | X |   |   |   |          | 1   | 566  | 15 | 0  | 0    | 1.00 |      |      | 6  | 0  | 0  | 6  | 0  | 0  |
| IPI00114401.1 | O08579   | Emd    | Emerin                                                            | X |   |   |   |          | 1   | 259  | 17 | 0  | 0    | 1.00 |      |      | 3  | 0  | 0  | 3  | 0  | 0  |
| IPI00127554.1 | O35130   | Emg1   | Probable ribosome biogenesis protein NEP1                         |   |   |   | X |          | 1   | 244  | 0  | 16 | 0    |      | 1.00 |      | 0  | 3  | 0  | 0  | 3  | 0  |
| IPI00621842.6 | Q03173   | Enah   | Enabled homolog                                                   | X |   |   | X |          | 0   | 804  | 8  | 0  | 4    | 1.00 |      | 1.00 | 4  | 0  | 3  | 4  | 0  | 3  |

|               |        |               |                                                                  |   |   |   |      |   |      |    |    |    |      |      |      |    |    |    |    |    |    |
|---------------|--------|---------------|------------------------------------------------------------------|---|---|---|------|---|------|----|----|----|------|------|------|----|----|----|----|----|----|
| IPI00331704.7 | P17183 | Eno2          | Gamma-enolase                                                    | X |   |   |      | 1 | 434  | 16 | 0  | 0  | 1.00 |      | 3    | 0  | 0  | 3  | 0  | 0  |    |
| IPI00228548.6 | P21550 | Eno3          | Beta-enolase                                                     | X | X | X |      | 1 | 434  | 19 | 22 | 21 | 0.99 | 1.00 | 0.98 | 5  | 8  | 6  | 4  | 7  | 6  |
| IPI00458003.1 | Q6DYE8 | Enpp3         | Ectonucleotide pyrophosphatase/phosphodiesterase family member 3 |   |   |   | X    | 0 | 874  | 0  | 0  | 4  |      | 1.00 | 0    | 0  | 3  | 0  | 0  | 3  |    |
| IPI00310578.3 | Q9JIX0 | Eny2          | Enhancer of yellow 2 transcription factor homolog                | X | X |   |      | 0 | 101  | 25 | 34 | 0  | 0.98 | 0.99 |      | 2  | 3  | 0  | 2  | 3  | 0  |
| IPI00309481.1 | O70318 | Epb4.1l2      | Band 4.1-like protein 2                                          | X |   |   |      | 0 | 988  | 4  | 0  | 0  | 0.99 |      | 2    | 0  | 0  | 2  | 0  | 0  |    |
| IPI00849631.1 |        | Epb4.1l4b     | erythrocyte protein band 4.1-like 4b                             |   |   |   | X    | 0 | 838  | 0  | 0  | 4  |      | 0.97 | 0    | 0  | 2  | 0  | 0  | 2  |    |
| IPI00320459.2 | Q8R0W0 | Eppk1         | Epiplakin                                                        |   | X | X |      | 0 | 6548 | 0  | 13 | 5  |      | 1.00 | 0.98 | 0  | 8  | 5  | 0  | 8  | 5  |
| IPI00339916.9 | Q8CGC7 | Eprs          | Bifunctional aminoacyl-tRNA synthetase                           | X | X |   |      | 0 | 1512 | 3  | 19 | 0  | 1.00 | 1.00 |      | 3  | 22 | 0  | 3  | 22 | 0  |
| IPI00890139.1 | Q3UIS9 | Eps15l1       | Epidermal growth factor receptor pathway substrate 15            | X |   |   |      | 0 | 907  | 15 | 0  | 0  | 1.00 |      | 7    | 0  | 0  | 7  | 0  | 0  |    |
| IPI00460558.3 | Q6PH08 | Erc2          | ERC protein 2                                                    |   |   | X |      | 0 | 957  | 0  | 0  | 2  |      | 0.93 | 0    | 0  | 2  | 0  | 0  | 2  |    |
| IPI00221540.1 | Q8BFZ9 | Erlin2        | Erlin-2                                                          |   |   | X |      | 0 | 340  | 0  | 0  | 12 |      | 0.98 | 0    | 0  | 3  | 0  | 0  | 3  |    |
| IPI00118832.1 | P57759 | Erp29         | Endoplasmic reticulum protein ERp29                              | X |   |   |      | 0 | 262  | 31 | 0  | 0  | 1.00 |      | 5    | 0  | 0  | 5  | 0  | 0  |    |
| IPI00109142.4 | Q9R0P3 | Esd           | S-formylglutathione hydrolase                                    |   |   | X |      | 0 | 282  | 0  | 0  | 20 |      | 1.00 | 0    | 0  | 4  | 0  | 0  | 4  |    |
| IPI00128450.1 | Q3U7R1 | Esyt1         | Extended synaptotagmin-1                                         |   |   | X |      | 3 | 1092 | 0  | 0  | 2  |      | 0.99 | 0    | 0  | 2  | 0  | 0  | 2  |    |
| IPI00312468.5 | Q8BWW3 | Etf1          | Eukaryotic peptide chain release factor subunit 1                |   | X | X |      | 0 | 437  | 0  | 24 | 14 |      | 1.00 | 1.00 | 0  | 7  | 5  | 0  | 7  | 5  |
| IPI00116753.4 | Q99LC5 | Etfa          | Electron transfer flavoprotein subunit alpha, mitochondrial      |   | X | X |      | 1 | 333  | 0  | 15 | 28 |      | 1.00 | 1.00 | 0  | 4  | 6  | 0  | 4  | 6  |
| IPI00411164.4 |        | Etl4          | enhancer trap locus 4                                            | X |   |   |      | 0 | 1997 | 12 | 0  | 0  | 1.00 |      | 15   | 0  | 0  | 14 | 0  | 0  |    |
| IPI00467271.2 | Q8K1G2 | Evc2          | Limbin                                                           |   |   | X |      | 1 | 1220 | 0  | 0  | 2  |      | 0.90 | 0    | 0  | 3  | 0  | 0  | 3  |    |
| IPI00122831.5 | Q3U9D6 | Exoc6         | exocyst complex component 6                                      | X |   |   |      | 1 | 804  | 4  | 0  | 0  | 0.92 |      | 2    | 0  | 0  | 2  | 0  | 0  |    |
| IPI00468525.4 | Q61188 | Ezh2          | Histone-lysine N-methyltransferase EZH2                          | X |   |   |      | 0 | 746  | 7  | 0  | 0  | 1.00 |      | 4    | 0  | 0  | 3  | 0  | 0  |    |
| IPI00387253.3 | Q8C263 | F630043A04Rik | Spindle and kinetochore-associated protein 3                     | X |   |   |      | 0 | 411  | 14 | 0  | 0  | 1.00 |      | 4    | 0  | 0  | 4  | 0  | 0  |    |
| IPI00230124.5 | P11404 | Fabp3         | Fatty acid-binding protein, heart                                |   | X | X |      | 0 | 133  | 0  | 17 | 23 |      | 1.00 | 1.00 | 0  | 2  | 3  | 0  | 2  | 3  |
| IPI00108791.1 | P54731 | Faf1          | FAS-associated factor 1                                          |   | X |   |      | 0 | 649  | 0  | 4  | 0  |      | 1.00 | 0    | 2  | 0  | 0  | 2  | 0  |    |
| IPI00109611.1 | Q9D6U8 | Fam162a       | UPF0389 protein FAM162A                                          | X | X |   |      | 1 | 155  | 0  | 12 | 0  |      | 1.00 | 0    | 2  | 0  | 0  | 2  | 0  |    |
| IPI00808550.1 | Q5XG69 | Fam169a       | UPF0611 protein FAM169A                                          | X | X | X |      | 0 | 665  | 9  | 5  | 4  | 1.00 | 0.96 | 0.98 | 3  | 2  | 2  | 3  | 2  | 2  |
| IPI00331260.1 | Q91WE2 | Fam192a       | NEFA-interacting nuclear protein NIP30                           | X |   |   |      | 1 | 254  | 11 | 0  | 0  | 1.00 |      | 2    | 0  | 0  | 2  | 0  | 0  |    |
| IPI00122015.1 | Q921M7 | Fam49b        | Protein FAM49B                                                   |   |   | X |      | 1 | 324  | 0  | 0  | 8  |      | 1.00 | 0    | 0  | 2  | 0  | 0  | 2  |    |
| IPI00322922.4 | Q9WV03 | Fam50a        | Protein FAM50A                                                   | X |   |   |      | 0 | 339  | 17 | 0  | 0  | 1.00 |      | 4    | 0  | 0  | 4  | 0  | 0  |    |
| IPI00172255.1 | Q9WTJ8 | Fam50b        | Protein FAM50B                                                   | X |   |   |      | 0 | 334  | 13 | 0  | 0  | 0.92 |      | 3    | 0  | 0  | 3  | 0  | 0  |    |
| IPI00109033.3 | Q9CWE0 | Fam54b        | Isoform 1 of Protein FAM54B                                      | X |   |   | 2DLC | 0 | 289  | 10 | 0  | 0  | 1.00 |      | 3    | 0  | 0  | 3  | 0  | 0  |    |
| IPI00227516.4 | Q148V8 | Fam83h        | Protein FAM83H                                                   | X |   |   |      | 0 | 1209 | 5  | 0  | 0  | 1.00 |      | 3    | 0  | 0  | 3  | 0  | 0  |    |
| IPI00263874.3 | Q8C0C7 | Farsa         | Phenylalanyl-tRNA synthetase alpha chain                         |   |   | X |      | 0 | 508  | 0  | 0  | 9  |      | 1.00 | 0    | 0  | 2  | 0  | 0  | 2  |    |
| IPI00322828.1 | Q9WUA2 | Farsb         | Phenylalanyl-tRNA synthetase beta chain                          |   | X | X |      | 0 | 589  | 0  | 18 | 6  |      | 1.00 | 1.00 | 0  | 9  | 4  | 0  | 9  | 4  |
| IPI00113223.2 | P19096 | Fasn          | Fatty acid synthase                                              |   | X | X |      | 6 | 2504 | 0  | 42 | 16 |      | 1.00 | 1.00 | 0  | 74 | 24 | 0  | 72 | 24 |
| IPI00114860.4 | Q71FD7 | Fblim1        | Filamin-binding LIM protein 1                                    | X |   | X |      | 0 | 375  | 26 | 0  | 11 | 1.00 |      | 1.00 | 6  | 0  | 2  | 6  | 0  | 2  |
| IPI00420711.1 | Q6PB97 | Fbxl19        | F-box/LRR-repeat protein 19                                      |   | X |   |      | 0 | 674  | 0  | 0  | 3  |      | 0.99 | 0    | 0  | 2  | 0  | 0  | 2  |    |
| IPI00624157.2 |        | Fcgbp         | Fc fragment of IgG binding protein                               |   | X |   |      | 1 | 2583 | 0  | 1  | 0  |      | 0.92 | 0    | 2  | 0  | 0  | 2  | 0  |    |
| IPI00120457.1 | Q920E5 | Fdps          | Farnesyl pyrophosphate synthetase                                |   | X | X |      | 2 | 353  | 0  | 10 | 9  |      | 1.00 | 1.00 | 0  | 3  | 3  | 0  | 3  | 3  |
| IPI00410836.1 | Q8C5X6 | Fen1          | Putative uncharacterized protein                                 | X |   |   |      | 0 | 411  | 12 | 0  | 0  | 1.00 |      | 3    | 0  | 0  | 3  | 0  | 0  |    |
| IPI00276222.1 | Q8CIB5 | Fermt2        | Fermitin family homolog 2                                        |   |   | X |      | 0 | 680  | 0  | 0  | 4  |      | 0.99 | 0    | 0  | 2  | 0  | 0  | 2  |    |
| IPI00129928.2 | P97807 | Fh1           | Fumarate hydratase, mitochondrial                                |   |   | X |      | 0 | 507  | 0  | 0  | 13 |      | 1.00 | 0    | 0  | 5  | 0  | 0  | 5  |    |
| IPI00331030.3 | Q8BPY9 | Fignl1        | Fidgetin-like protein 1                                          | X |   |   |      | 0 | 683  | 5  | 0  | 0  | 0.97 |      | 2    | 0  | 0  | 2  | 0  | 0  |    |
| IPI00467002.4 | Q9WTJ4 | Fiz1          | Fit3-interacting zinc finger protein 1                           | X |   |   |      | 1 | 500  | 4  | 0  | 0  | 1.00 |      | 2    | 0  | 0  | 2  | 0  | 0  |    |
| IPI00126000.1 | Q62446 | Fkbp3         | FK506-binding protein 3                                          | X |   |   |      | 0 | 224  | 31 | 0  | 0  | 1.00 |      | 9    | 0  | 0  | 9  | 0  | 0  |    |
| IPI00230139.5 | P30416 | Fkbp4         | FK506-binding protein 4                                          | X | X | X |      | 0 | 458  | 47 | 45 | 21 | 1.00 | 1.00 | 1.00 | 23 | 17 | 8  | 20 | 17 | 8  |
| IPI00406870.3 | Q2VIS4 | Flg2          | Filaggrin-2                                                      | X |   |   |      | 1 | 2362 | 2  | 0  | 0  | 1.00 |      | 3    | 0  | 0  | 2  | 0  | 0  |    |



|                |          |         | 2DLC, 1DE,                                                             |   |   |   |           |   |      |    |    |    |      |      |      |    |    |    |    |    |    |
|----------------|----------|---------|------------------------------------------------------------------------|---|---|---|-----------|---|------|----|----|----|------|------|------|----|----|----|----|----|----|
|                |          |         |                                                                        |   |   |   |           |   |      |    |    |    |      |      |      |    |    |    |    |    |    |
| IPI00131138.10 | Q8BTM8   | Flna    | Isoform 1 of Filamin-A                                                 | X | X | X | UF        | 1 | 2647 | 4  | 37 | 18 | 1.00 | 1.00 | 1.00 | 6  | 66 | 34 | 6  | 66 | 34 |
| IPI00663627.1  | Q80X90   | Flnb    | Filamin-B                                                              | X | X | X |           | 1 | 2602 | 6  | 30 | 20 | 1.00 | 1.00 | 1.00 | 9  | 57 | 31 | 9  | 57 | 31 |
| IPI00664670.4  | Q8VHX6   | FlnC    | Filamin-C                                                              |   | X | X |           | 1 | 2737 | 0  | 2  | 6  |      | 1.00 | 1.00 | 0  | 6  | 12 | 0  | 6  | 12 |
| IPI00124497.3  | P35969   | Flt1    | Vascular endothelial growth factor receptor 1                          |   |   | X |           | 1 | 1333 | 0  | 0  | 1  |      | 0.92 | 0    | 0  | 2  | 0  | 0  | 2  | 0  |
| IPI00270737.5  | Q6AXB7   | Fmr1    | Fragile X mental retardation syndrome 1 homolog                        | X | X |   |           | 0 | 614  | 5  | 6  | 0  | 1.00 | 1.00 |      | 2  | 3  | 0  | 2  | 3  | 0  |
| IPI00652813.1  | Q3UHL6   | Fn1     | Putative uncharacterized protein                                       |   | X |   |           | 0 | 2361 | 0  | 6  | 0  |      | 1.00 |      | 0  | 8  | 0  | 0  | 8  | 0  |
| IPI00876259.1  | Q80TY0   | Fnbp1   | Formin binding protein 1                                               | X |   |   |           | 0 | 619  | 3  | 0  | 0  | 0.98 |      | 2    | 0  | 0  | 2  | 0  | 0  | 0  |
| IPI00762582.3  | Q9DBY0   | Foxp4   | Forkhead box protein P4                                                | X |   |   |           | 0 | 807  | 5  | 0  | 0  | 1.00 |      | 2    | 0  | 0  | 2  | 0  | 0  | 0  |
| IPI00114365.1  | P48760   | Fpgs    | Folypolyglutamate synthase                                             |   |   | X |           | 2 | 587  | 0  | 0  | 8  |      | 1.00 | 0    | 0  | 2  | 0  | 0  | 2  | 0  |
| IPI00311968.1  | P97376   | Frg1    | Protein FRG1                                                           | X |   |   |           | 0 | 258  | 21 | 0  | 0  | 1.00 |      | 3    | 0  | 0  | 3  | 0  | 0  | 0  |
| IPI00353563.4  | Q61553   | Fscn1   | Fascin                                                                 | X | X | X |           | 0 | 493  | 15 | 20 | 11 | 1.00 | 1.00 | 1.00 | 5  | 8  | 7  | 5  | 8  | 7  |
| IPI00750014.4  |          | Fsip2   | PREDICTED: similar to fibrous sheath-interacting protein 2             |   |   | X |           | 6 | 6483 | 0  | 0  | 1  |      | 0.93 | 0    | 0  | 4  | 0  | 0  | 4  | 0  |
| IPI00762203.2  | P29391   | Ftl1    | Ferritin light chain 1                                                 | X | X |   |           | 0 | 183  | 59 | 0  | 17 | 1.00 |      | 1.00 | 8  | 0  | 3  | 7  | 0  | 3  |
| IPI00625129.3  | P49945   | Ftl2    | ferritin light chain 2                                                 | X | X |   |           | 0 | 183  | 59 | 0  | 17 | 1.00 |      | 1.00 | 7  | 0  | 3  | 7  | 0  | 3  |
| IPI00119632.3  | Q9DBE9   | Ftsj3   | Putative rRNA methyltransferase 3                                      | X |   | X |           | 2 | 838  | 4  | 0  | 5  | 1.00 |      | 1.00 | 2  | 0  | 3  | 2  | 0  | 3  |
| IPI00123292.5  | Q3UUU2   | Fubp1   | Far upstream element-binding protein 1                                 | X | X | X |           | 1 | 700  | 22 | 16 | 7  | 1.00 | 1.00 | 1.00 | 11 | 10 | 4  | 10 | 10 | 4  |
| IPI00379513.6  | Q3TIX6   | Fubp3   | far upstream element (FUSE) binding protein 3                          | X | X | X |           | 0 | 575  | 14 | 14 | 23 | 1.00 | 1.00 | 1.00 | 4  | 7  | 7  | 4  | 7  | 7  |
| IPI00117063.1  | P56959   | Fus     | RNA-binding protein FUS                                                | X | X | X |           | 0 | 518  | 15 | 8  | 9  | 1.00 | 1.00 | 1.00 | 5  | 2  | 4  | 5  | 2  | 4  |
| IPI00122521.1  | Q61584   | Fxr1    | Fragile X mental retardation syndrome-related protein 1                | X | X |   |           | 0 | 677  | 21 | 30 | 0  | 1.00 | 1.00 |      | 10 | 15 | 0  | 9  | 15 | 0  |
| IPI00126389.2  | Q6P5B5   | Fxr2    | Putative uncharacterized protein                                       | X | X | X |           | 0 | 674  | 13 | 15 | 5  | 1.00 | 1.00 | 0.99 | 5  | 7  | 3  | 4  | 7  | 3  |
| IPI00130095.1  | P97855   | G3bp1   | Ras GTPase-activating protein-binding protein 1                        | X | X | X |           | 0 | 465  | 34 | 36 | 25 | 1.00 | 1.00 | 1.00 | 13 | 13 | 8  | 11 | 13 | 8  |
| IPI00124245.1  | P97379   | G3bp2   | Ras GTPase-activating protein-binding protein 2                        | X | X | X |           | 0 | 482  | 8  | 16 | 10 | 1.00 | 1.00 | 1.00 | 2  | 5  | 4  | 2  | 5  | 4  |
| IPI00111960.2  | P70699   | Gaa     | Lysosomal alpha-glucosidase                                            |   |   | X |           | 3 | 953  | 0  | 0  | 5  |      | 1.00 | 0    | 0  | 2  | 0  | 0  | 2  | 0  |
| IPI00406794.2  | Q9QY0    | Gab1    | GRB2-associated-binding protein 1                                      | X |   |   |           | 0 | 695  | 6  | 0  | 0  | 1.00 |      | 3    | 0  | 0  | 3  | 0  | 0  | 0  |
| IPI00265025.5  | Q9JIA6   | Galk1   | galactokinase 1                                                        |   |   | X |           | 1 | 392  | 0  | 10 | 0  |      | 1.00 |      | 0  | 3  | 0  | 0  | 3  | 0  |
| IPI00115679.1  | Q8BHN3-2 | Ganab   | Neutral alpha-glucosidase AB                                           |   |   | X | X         | 2 | 966  | 0  | 7  | 7  |      | 1.00 | 1.00 | 0  | 5  | 6  | 0  | 5  | 6  |
| IPI00110931.1  | Q9CY66   | Gar1    | H/ACA ribonucleoprotein complex subunit 1                              | X |   |   |           | 0 | 231  | 13 | 0  | 0  | 1.00 |      | 3    | 0  | 0  | 3  | 0  | 0  | 0  |
| IPI00112555.3  | Q9CZD3   | Gars    | Glycyl-tRNA synthetase                                                 | X | X | X |           | 2 | 729  | 7  | 26 | 10 | 1.00 | 1.00 | 1.00 | 3  | 14 | 6  | 3  | 14 | 6  |
| IPI00230612.3  | Q3TGI3   | Gart    | phosphoribosylglycinamide formyltransferase                            | X | X | X |           | 1 | 1010 | 2  | 35 | 30 | 1.00 | 1.00 | 1.00 | 2  | 22 | 21 | 2  | 22 | 21 |
| IPI00625995.1  | Q8CHY6   | Gatad2a | Transcriptional repressor p66 alpha                                    | X |   |   |           | 0 | 630  | 14 | 0  | 0  | 1.00 |      | 5    | 0  | 0  | 5  | 0  | 0  | 0  |
| IPI00128615.1  | Q8VHR5   | Gatad2b | Transcriptional repressor p66-beta                                     | X |   |   |           | 0 | 594  | 13 | 0  | 0  | 1.00 |      | 4    | 0  | 0  | 4  | 0  | 0  | 0  |
| IPI00457499.5  | Q8CHY6   | Gcn111  | GCN1 general control of amino-acid synthesis 1-like 1                  |   |   | X | X         | 9 | 2671 | 0  | 14 | 4  |      | 1.00 | 1.00 | 0  | 27 | 6  | 0  | 26 | 6  |
| IPI00122565.1  | Q61598   | Gdi2    | Rab GDP dissociation inhibitor beta                                    | X | X | X |           | 0 | 445  | 23 | 35 | 32 | 1.00 | 1.00 | 1.00 | 8  | 12 | 12 | 8  | 12 | 12 |
| IPI00169775.6  | Q6P6L6   | Gemin4  | Putative uncharacterized protein                                       |   |   | X |           | 3 | 1058 | 0  | 0  | 5  |      | 1.00 | 0    | 0  | 3  | 0  | 0  | 3  | 0  |
| IPI00230283.5  | Q8K0D5   | Gfm1    | Elongation factor G, mitochondrial                                     |   |   | X |           | 2 | 751  | 0  | 10 | 0  |      | 1.00 |      | 0  | 5  | 0  | 0  | 5  | 0  |
| IPI00338876.3  | Q8R2Q4   | Gfm2    | Ribosome-releasing factor 2, mitochondrial                             |   |   | X |           | 0 | 779  | 0  | 8  | 0  |      | 1.00 |      | 0  | 3  | 0  | 0  | 3  | 0  |
| IPI00278312.6  | Q9Z2Z9   | Gfpt2   | Glucosamine--fructose-6-phosphate aminotransferase [isomerizing] 2     |   |   | X | X         | 2 | 682  | 0  | 5  | 5  |      | 1.00 | 1.00 | 0  | 2  | 2  | 0  | 2  | 2  |
| IPI00473912.4  | Q6Y7W8   | Gigyf2  | Isoform 1 of PERQ amino acid-rich with GYF domain-containing protein 2 | X | X |   | 2DLC, 1DE | 0 | 1291 | 15 | 4  | 0  | 1.00 | 1.00 |      | 15 | 3  | 0  | 13 | 3  | 0  |
| IPI00470095.1  | Q68FF6   | Git1    | ARF GTPase-activating protein GIT1                                     | X |   |   |           | 0 | 770  | 6  | 0  | 0  | 1.00 |      | 2    | 0  | 0  | 2  | 0  | 0  | 0  |
| IPI00127267.4  | Q91W43   | Gldc    | Glycine dehydrogenase [decarboxylating], mitochondrial                 |   |   | X | X         | 1 | 1025 | 0  | 29 | 8  |      | 1.00 | 1.00 | 0  | 19 | 3  | 0  | 19 | 3  |
| IPI00122399.1  | Q61543   | Glg1    | Golgi apparatus protein 1                                              |   |   | X |           | 1 | 1175 | 0  | 14 | 0  |      | 1.00 |      | 0  | 13 | 0  | 0  | 13 | 0  |

|               |        |         |                                                                                              |   |   |   |      |   |     |    |    |    |      |      |      |    |    |    |    |    |    |
|---------------|--------|---------|----------------------------------------------------------------------------------------------|---|---|---|------|---|-----|----|----|----|------|------|------|----|----|----|----|----|----|
| IPI00416279.3 | Q9CYL5 | Glpr2   | Golgi-associated plant pathogenesis-related protein 1                                        | X |   |   |      | 0 | 154 | 14 | 0  | 0  | 1.00 |      | 2    | 0  | 0  | 2  | 0  | 0  |    |
| IPI00321734.7 | Q9CPU0 | Glo1    | Lactoylglutathione lyase                                                                     | X | X | X |      | 0 | 184 | 27 | 29 | 9  | 1.00 | 1.00 | 1.00 | 5  | 4  | 2  | 4  | 4  | 2  |
| IPI00110721.5 | Q9CPV4 | Glod4   | Glyoxalase domain-containing protein 4                                                       | X |   |   |      | 0 | 298 | 16 | 0  | 0  | 1.00 |      | 3    | 0  | 0  | 3  | 0  | 0  |    |
| IPI00315550.3 | Q9CQM9 | Glrx3   | Glutaredoxin-3                                                                               | X | X | X |      | 0 | 337 | 13 | 11 | 7  | 1.00 | 1.00 | 1.00 | 3  | 3  | 2  | 3  | 3  | 2  |
| IPI00169870.6 | Q8K297 | GlT5d1  | Glycosyltransferase 25 family member 1<br>glioma tumor suppressor candidate region<br>gene 2 |   |   | X |      | 0 | 617 | 0  | 4  | 0  |      | 0.99 | 0    | 2  | 0  | 0  | 2  | 0  |    |
| IPI00122471.5 | Q8BK35 | Gltsr2  |                                                                                              | X |   |   |      | 0 | 484 | 15 | 0  | 0  | 1.00 |      | 5    | 0  | 0  | 5  | 0  | 0  |    |
| IPI00114209.1 | P26443 | Glud1   | Glutamate dehydrogenase 1, mitochondrial                                                     | X | X | X |      | 0 | 558 | 6  | 5  | 19 | 1.00 | 1.00 | 1.00 | 2  | 3  | 8  | 2  | 3  | 8  |
| IPI00123164.2 |        | Gm10077 | similar to ribosomal protein L36a                                                            | X | X |   |      | 0 | 106 | 18 | 16 | 0  | 0.91 | 1.00 |      | 4  | 2  | 0  | 4  | 2  | 0  |
| IPI00469918.4 | Q5CZY9 | Gm10079 | Rps16 protein                                                                                | X | X | X |      | 0 | 172 | 49 | 51 | 40 | 1.00 | 1.00 | 1.00 | 13 | 11 | 7  | 12 | 11 | 7  |
| IPI00473762.1 |        | Gm10117 | similar to 60S ribosomal protein L9 isoform<br>1                                             | X |   |   | 2DLC | 0 | 192 | 53 | 0  | 0  | 1.00 |      | 9    | 0  | 0  | 9  | 0  | 0  |    |
| IPI00473521.1 |        | Gm10119 | similar to ribosomal protein S3a                                                             | X | X | X |      | 0 | 264 | 39 | 54 | 41 | 1.00 | 1.00 | 1.00 | 17 | 18 | 11 | 14 | 15 | 10 |
| IPI00461456.1 | P62751 | Gm10132 | 60S ribosomal protein L23a                                                                   | X | X |   |      | 0 | 156 | 54 | 18 | 0  | 0.94 | 0.99 |      | 13 | 2  | 0  | 13 | 2  | 0  |
| IPI00626233.3 |        | Gm10164 | similar to Rpl17 protein                                                                     | X | X |   |      | 0 | 227 | 26 | 26 | 0  | 1.00 | 1.00 |      | 8  | 6  | 0  | 6  | 5  | 0  |
| IPI00606310.1 |        | Gm10169 | Similar to macrophage migration inhibitory<br>factor                                         |   |   | X |      | 0 | 115 | 0  | 0  | 32 |      | 1.00 | 0    | 0  | 3  | 0  | 0  | 0  | 3  |
| IPI00124973.1 | P52293 | Gm10184 | Importin subunit alpha-2                                                                     |   | X | X |      | 3 | 529 | 0  | 39 | 44 |      | 1.00 | 1.00 | 0  | 13 | 15 | 0  | 13 | 15 |
| IPI00123007.1 | P62900 | Gm10191 | 60S ribosomal protein L31                                                                    | X | X | X |      | 0 | 125 | 38 | 32 | 30 | 1.00 | 1.00 | 1.00 | 5  | 4  | 4  | 5  | 4  | 4  |
| IPI00621613.1 |        | Gm10196 | similar to hCG1994130                                                                        | X |   |   |      | 0 | 130 | 26 | 0  | 0  | 1.00 |      | 3    | 0  | 0  | 2  | 0  | 0  |    |
| IPI00752289.2 |        | Gm10290 | similar to Glyceraldehyde-3-phosphate<br>dehydrogenase (GAPDH)                               | X |   |   |      | 0 | 333 | 41 | 0  | 0  | 1.00 |      | 10   | 0  | 0  | 8  | 0  | 0  |    |
| IPI00756025.1 |        | Gm10313 | similar to LOC654472 protein                                                                 |   |   | X |      | 0 | 333 | 0  | 0  | 25 |      | 0.99 | 0    | 0  | 7  | 0  | 0  | 7  |    |
| IPI00128760.1 | P68037 | Gm10705 | Ubiquitin-conjugating enzyme E2 L3                                                           | X | X |   |      | 0 | 154 | 29 | 46 | 0  | 1.00 | 1.00 |      | 3  | 4  | 0  | 3  | 4  | 0  |
| IPI00122421.5 | P61358 | Gm11518 | 60S ribosomal protein L27                                                                    | X | X | X |      | 0 | 136 | 43 | 36 | 34 | 1.00 | 1.00 | 1.00 | 6  | 4  | 4  | 5  | 4  | 4  |
| IPI00461292.4 |        | Gm11531 | similar to Ribosomal protein L17                                                             | X |   |   |      | 0 | 159 | 22 | 0  | 0  | 1.00 |      | 3    | 0  | 0  | 3  | 0  | 0  |    |
| IPI00850073.1 |        | Gm12013 | similar to ribosomal protein L39                                                             |   |   | X |      | 0 | 63  | 0  | 0  | 16 |      | 1.00 | 0    | 0  | 2  | 0  | 0  | 2  |    |
| IPI00749932.1 |        | Gm12141 | similar to Heat shock protein 1                                                              | X |   | X |      | 1 | 497 | 3  | 0  | 7  | 0.00 | 0.95 | 1    | 0  | 3  | 1  | 0  | 3  |    |
| IPI00277753.1 |        | Gm12260 | similar to histone H3                                                                        |   |   | X |      | 0 | 136 | 0  | 0  | 43 |      | 1.00 | 0    | 0  | 6  | 0  | 0  | 5  |    |
| IPI00620288.1 |        | Gm12938 | similar to ribosomal protein L28                                                             | X | X | X |      | 0 | 137 | 26 | 20 | 33 | 1.00 | 1.00 | 1.00 | 5  | 4  | 5  | 5  | 4  | 5  |
| IPI00120871.1 | Q9DCG9 | Gm13072 | TRM112-like protein                                                                          | X |   | X |      | 0 | 125 | 26 | 0  | 20 | 1.00 |      | 1.00 | 2  | 0  | 2  | 0  | 0  | 2  |
| IPI00113655.1 | P62754 | Gm13654 | 40S ribosomal protein S6                                                                     | X | X | X |      | 0 | 249 | 26 | 30 | 30 | 1.00 | 1.00 | 1.00 | 8  | 6  | 6  | 7  | 6  | 6  |
| IPI00473415.1 |        | Gm14059 | similar to 40S ribosomal protein S12                                                         | X | X | X |      | 0 | 132 | 27 | 40 | 34 | 0.99 | 1.00 | 1.00 | 3  | 5  | 5  | 3  | 5  | 5  |
| IPI00420261.5 | P63158 | Gm15387 | High mobility group protein B1                                                               |   |   | X |      | 0 | 215 | 0  | 0  | 13 |      | 1.00 | 0    | 0  | 3  | 0  | 0  | 3  |    |
| IPI00880213.1 |        | Gm15427 | ribosomal protein L18A family member                                                         | X | X | X |      | 0 | 191 | 18 | 25 | 31 | 1.00 | 1.00 | 1.00 | 5  | 6  | 8  | 4  | 6  | 7  |
| IPI00849927.1 | Q5XJF6 | Gm15451 | ribosomal protein L10A                                                                       | X | X | X |      | 0 | 217 | 36 | 56 | 38 | 1.00 | 1.00 | 1.00 | 12 | 12 | 7  | 10 | 11 | 7  |
| IPI00308706.4 | P47962 | Gm15500 | 60S ribosomal protein L5                                                                     | X | X | X |      | 0 | 297 | 41 | 48 | 23 | 1.00 | 1.00 | 1.00 | 22 | 12 | 6  | 17 | 10 | 6  |
| IPI00224505.7 | P47963 | Gm15710 | 60S ribosomal protein L13                                                                    | X | X |   |      | 0 | 211 | 38 | 23 | 0  | 1.00 | 1.00 |      | 10 | 5  | 0  | 9  | 5  | 0  |
| IPI00132460.1 | P61255 | Gm15772 | 60S ribosomal protein L26                                                                    | X | X | X |      | 0 | 145 | 51 | 39 | 43 | 1.00 | 1.00 | 1.00 | 12 | 9  | 7  | 12 | 9  | 7  |
| IPI00755309.1 | Q91VJ6 | Gm16468 | ribosomal protein L3                                                                         | X | X | X |      | 0 | 403 | 45 | 13 | 35 | 1.00 | 1.00 | 1.00 | 25 | 3  | 14 | 19 | 3  | 14 |
| IPI00848775.1 |        | Gm16470 | similar to Glyceraldehyde-3-phosphate<br>dehydrogenase                                       | X |   |   |      | 0 | 407 | 29 | 0  | 0  | 1.00 |      | 11   | 0  | 0  | 8  | 0  | 0  |    |
| IPI00263879.4 | Q6ZVV7 | Gm2000  | 60S ribosomal protein L35                                                                    | X | X | X |      | 0 | 123 | 35 | 15 | 15 | 1.00 | 0.99 | 1.00 | 5  | 2  | 3  | 5  | 2  | 3  |
| IPI00851014.1 |        | Gm2223  | similar to translation initiation factor eIF-2<br>gamma subunit                              | X | X | X |      | 1 | 480 | 10 | 26 | 18 | 0.99 | 1.00 | 1.00 | 2  | 8  | 8  | 2  | 8  | 8  |
| IPI00850093.1 |        | Gm3150  | similar to G protein gamma-5 subunit                                                         |   |   | X |      | 0 | 68  | 0  | 24 | 0  |      | 1.00 |      | 0  | 2  | 0  | 0  | 2  | 0  |
| IPI00849598.1 |        | Gm3405  | similar to QM protein                                                                        | X | X | X |      | 0 | 214 | 33 | 19 | 23 | 1.00 | 1.00 | 1.00 | 8  | 6  | 5  | 6  | 5  | 5  |
| IPI00469351.3 |        | Gm4130  | similar to heterogeneous nuclear<br>ribonucleoprotein K                                      | X | X |   |      | 0 | 196 | 28 | 33 | 0  | 1.00 | 0.96 |      | 3  | 4  | 0  | 3  | 4  | 0  |
| IPI00874692.1 |        | Gm4294  | similar to ribosomal protein L15                                                             | X |   |   |      | 0 | 204 | 33 | 0  | 0  | 1.00 |      | 7    | 0  | 0  | 7  | 0  | 0  |    |
| IPI00850166.1 |        | Gm4340  | PREDICTED: similar to RNA and export<br>factor binding protein 1-II                          | X |   |   |      | 0 | 265 | 7  | 0  | 0  | 0.99 |      | 2    | 0  | 0  | 2  | 0  | 0  |    |
| IPI00849768.1 |        | Gm4363  | similar to HSPC016                                                                           |   |   | X |      | 0 | 64  | 0  | 31 | 0  |      | 0.94 |      | 0  | 3  | 0  | 0  | 3  | 0  |
| IPI00272545.5 |        | Gm4613  | similar to ribosomal protein L37a                                                            |   | X | X |      | 0 | 101 | 0  | 9  | 17 |      | 1.00 | 1.00 | 0  | 2  | 3  | 0  | 2  | 3  |

|               |        |        |                                                        |   |   |   |   |     |    |    |    |      |      |      |      |    |    |    |    |    |
|---------------|--------|--------|--------------------------------------------------------|---|---|---|---|-----|----|----|----|------|------|------|------|----|----|----|----|----|
| IPI00466153.4 | Q9D1R9 | Gm4705 | 60S ribosomal protein L34                              | X | X | X | 0 | 117 | 15 | 21 | 15 | 1.00 | 1.00 | 1.00 | 3    | 4  | 2  | 3  | 4  | 2  |
| IPI00762179.2 |        | Gm4720 | similar to ORF1                                        | X |   |   | 0 | 371 | 11 | 0  | 0  | 0.99 |      |      | 3    | 0  | 0  | 3  | 0  | 0  |
| IPI00343021.3 |        | Gm4838 | hypothetical protein                                   | X |   |   | 0 | 145 | 26 | 0  | 0  | 1.00 |      |      | 5    | 0  | 0  | 5  | 0  | 0  |
| IPI00890115.1 |        | Gm4968 | PREDICTED: hypothetical protein                        | X | X |   | 1 | 303 | 20 | 17 | 0  | 0.99 | 0.99 |      | 7    | 3  | 0  | 7  | 3  | 0  |
| IPI00606944.2 |        | Gm4970 | hypothetical protein                                   |   |   | X | 0 | 266 | 0  | 0  | 42 |      |      | 1.00 | 0    | 0  | 11 | 0  | 0  | 11 |
| IPI00108337.5 |        | Gm4986 | similar to Ac2-210                                     | X | X |   | 0 | 153 | 7  | 17 | 0  | 0.00 | 1.00 |      | 1    | 2  | 0  | 1  | 2  | 0  |
| IPI00128267.4 | A2AD25 | Gm4987 | MCG49690                                               | X | X |   | 0 | 135 | 27 | 17 | 0  | 0.97 | 1.00 |      | 3    | 3  | 0  | 3  | 2  | 0  |
|               |        |        | similar to endothelial monocyte-activating polypeptide |   | X |   | 0 | 224 | 0  | 10 | 0  |      |      | 1.00 | 0    | 2  | 0  | 0  | 2  | 0  |
| IPI00676841.1 | Q2YD80 | Gm5081 | hypothetical protein LOC328099                         |   | X | X | 1 | 318 | 0  | 18 | 24 |      |      | 1.00 | 1.00 | 0  | 5  | 5  | 0  | 5  |
| IPI00671398.1 |        | Gm5121 | similar to ribosomal protein S8                        | X |   |   | 0 | 208 | 35 | 0  | 0  | 0.98 |      |      | 7    | 0  | 0  | 7  | 0  | 0  |
| IPI00849245.1 |        | Gm5218 | similar to ribosomal protein                           |   | X |   | 1 | 542 | 0  | 4  | 0  |      |      | 1.00 | 0    | 2  | 0  | 0  | 2  | 0  |
| IPI00395100.1 | Q7M754 | Gm5409 | Try10-like trypsinogen                                 | X |   |   | 0 | 246 | 20 | 0  | 0  | 1.00 |      |      | 5    | 0  | 0  | 4  | 0  | 0  |
| IPI00457852.3 |        | Gm5428 | similar to ribosomal protein L6                        | X |   |   | 0 | 309 | 35 | 0  | 0  | 1.00 |      |      | 13   | 0  | 0  | 13 | 0  | 0  |
| IPI00461504.1 |        | Gm5445 | similar to hCG1782414                                  | X | X |   | 0 | 160 | 14 | 14 | 0  | 1.00 | 1.00 |      | 2    | 2  | 0  | 2  | 2  | 0  |
| IPI00890082.1 |        | Gm5534 | hypothetical protein                                   |   |   | X | 0 | 160 | 0  | 0  | 9  |      |      | 0.97 | 0    | 0  | 2  | 0  | 0  | 2  |
| IPI00621272.3 | Q9D0T1 | Gm5616 | NHP2-like protein 1                                    |   | X | X | 0 | 128 | 0  | 39 | 27 |      |      | 1.00 | 1.00 | 0  | 3  | 3  | 0  | 3  |
| IPI00470152.2 | Q642L7 | Gm6111 | ribosomal protein S27a                                 | X | X |   | 0 | 156 | 54 | 37 | 0  | 1.00 | 1.00 |      | 11   | 8  | 0  | 10 | 8  | 0  |
| IPI00875351.2 | B2RY53 | Gm6133 | EG620155 protein                                       | X |   | X | 0 | 190 | 12 | 0  | 23 | 0.01 |      | 1.00 | 2    | 0  | 4  | 2  | 0  | 4  |
| IPI00626312.1 |        | Gm6136 | similar to ribosomal protein L6                        | X | X | X | 0 | 296 | 42 | 36 | 38 | 1.00 | 1.00 | 1.00 | 16   | 12 | 13 | 15 | 12 | 13 |
| IPI00889220.1 |        | Gm6251 | ribosomal protein-like                                 | X |   |   | 0 | 133 | 29 | 0  | 0  | 1.00 |      |      | 4    | 0  | 0  | 4  | 0  | 0  |
| IPI00622837.1 |        | Gm6265 | hypothetical protein                                   |   | X |   | 0 | 76  | 0  | 46 | 0  |      |      | 1.00 | 0    | 4  | 0  | 0  | 4  | 0  |
| IPI00123176.1 |        | Gm6316 | 37 kDa protein                                         | X |   |   | 0 | 339 | 29 | 0  | 0  | 1.00 |      |      | 9    | 0  | 0  | 8  | 0  | 0  |
|               |        |        | Probable ribosome biogenesis protein RLP24             |   |   |   | 0 | 163 | 17 | 0  | 0  | 1.00 |      |      | 3    | 0  | 0  | 2  | 0  | 0  |
| IPI00116252.1 | Q99L28 | Gm6457 |                                                        | X |   |   | 0 | 163 | 17 | 0  | 0  | 1.00 |      |      | 3    | 0  | 0  | 2  | 0  | 0  |
| IPI00133801.3 | Q9D1J3 | Gm6563 | SAP domain-containing ribonucleoprotein                |   |   | X | 0 | 210 | 0  | 0  | 28 |      |      | 1.00 | 0    | 0  | 5  | 0  | 0  | 5  |
| IPI00850777.1 |        | Gm6570 | similar to ribosomal protein L30                       |   | X |   | 0 | 115 | 0  | 24 | 0  |      |      | 1.00 | 0    | 2  | 0  | 0  | 2  | 0  |
| IPI00663555.1 |        | Gm6630 | similar to ribosomal protein                           | X |   |   | 0 | 151 | 17 | 0  | 0  | 1.00 |      |      | 4    | 0  | 0  | 3  | 0  | 0  |
| IPI00674601.1 |        | Gm6654 | similar to ribosomal protein S26                       | X | X |   | 0 | 115 | 31 | 21 | 0  | 1.00 | 1.00 |      | 3    | 2  | 0  | 3  | 2  | 0  |
|               |        |        | Peptidyl-prolyl cis-trans isomerase NIMA-interacting 4 | X |   |   | 0 | 131 | 40 | 0  | 0  | 1.00 |      |      | 6    | 0  | 0  | 3  | 0  | 0  |
| IPI00757219.1 |        | Gm6910 | 25 kDa protein                                         | X |   |   | 0 | 228 | 31 | 0  | 0  | 1.00 |      |      | 5    | 0  | 0  | 5  | 0  | 0  |
|               |        |        | similar to human protein homologous to DROER protein   |   | X |   | 0 | 104 | 0  | 16 | 0  |      |      | 1.00 | 0    | 2  | 0  | 0  | 2  | 0  |
| IPI00620075.2 |        | Gm6941 |                                                        |   | X |   | 0 | 104 | 0  | 16 | 0  |      |      | 1.00 | 0    | 2  | 0  | 0  | 2  | 0  |
| IPI00625893.3 |        | Gm6981 | 36 kDa protein                                         | X | X |   | 0 | 335 | 16 | 23 | 0  | 0.09 | 1.00 |      | 5    | 4  | 0  | 4  | 4  | 0  |
| IPI00621229.1 |        | Gm6998 | similar to ribosomal protein S8                        | X | X |   | 0 | 208 | 45 | 46 | 0  | 1.00 | 1.00 |      | 10   | 9  | 0  | 10 | 9  | 0  |
|               |        |        | similar to Glyceraldehyde-3-phosphate dehydrogenase    |   | X |   | 0 | 182 | 0  | 25 | 0  |      |      | 0.92 | 0    | 2  | 0  | 0  | 2  | 0  |
| IPI00666411.2 |        | Gm7189 |                                                        |   | X |   | 0 | 182 | 0  | 25 | 0  |      |      | 0.92 | 0    | 2  | 0  | 0  | 2  | 0  |
| IPI00756253.2 |        | Gm7206 | similar to 60S ribosomal protein L9                    | X | X | X | 0 | 187 | 21 | 44 | 0  | 1.00 | 1.00 | 1.00 | 4    | 3  | 5  | 4  | 3  | 5  |
| IPI00889899.1 |        | Gm7251 | hypothetical protein                                   |   | X |   | 0 | 351 | 0  | 18 | 0  |      |      | 1.00 | 0    | 6  | 0  | 0  | 6  | 0  |
|               |        |        | similar to Glyceraldehyde-3-phosphate dehydrogenase    |   |   |   | 0 | 336 | 37 | 54 | 0  | 1.00 | 1.00 |      | 11   | 21 | 0  | 8  | 12 | 0  |
| IPI00751677.3 |        | Gm7293 |                                                        | X | X |   | 0 | 336 | 37 | 54 | 0  | 1.00 | 1.00 |      | 11   | 21 | 0  | 8  | 12 | 0  |
| IPI00626628.1 | Q9CQ16 | Gm7536 | ribosomal protein L27a                                 | X | X | X | 0 | 148 | 26 | 22 | 28 | 1.00 | 1.00 | 1.00 | 4    | 3  | 5  | 4  | 3  | 5  |
| IPI00230150.1 | P62309 | Gm8186 | Small nuclear ribonucleoprotein G                      | X | X |   | 0 | 76  | 25 | 37 | 0  | 0.92 | 1.00 |      | 2    | 5  | 0  | 2  | 5  | 0  |
| IPI00330363.8 | P12970 | Gm8226 | 60S ribosomal protein L7a                              |   | X |   | 0 | 266 | 0  | 36 | 0  |      |      | 1.00 | 0    | 11 | 0  | 0  | 11 | 0  |
| IPI00880400.1 | P25444 | Gm8553 | 40S ribosomal protein S2                               | X | X |   | 1 | 293 | 43 | 43 | 0  | 0.99 | 1.00 |      | 13   | 11 | 0  | 13 | 11 | 0  |
|               |        |        | similar to Acidic ribosomal phosphoprotein P0          | X | X |   | 1 | 317 | 11 | 50 | 0  | 0.02 | 1.00 |      | 3    | 10 | 0  | 3  | 10 | 0  |
| IPI00626366.3 |        | Gm8730 |                                                        | X | X |   | 1 | 317 | 11 | 50 | 0  | 0.02 | 1.00 |      | 3    | 10 | 0  | 3  | 10 | 0  |
| IPI00752723.1 |        | Gm8842 | hypothetical protein isoform 2                         | X |   |   | 1 | 293 | 43 | 0  | 0  | 0.99 |      |      | 12   | 0  | 0  | 12 | 0  | 0  |
|               |        |        | similar to non-muscle myosin alkali light chain        |   |   |   | 0 | 210 | 15 | 0  | 0  | 1.00 |      |      | 3    | 0  | 0  | 3  | 0  | 0  |
| IPI00848866.1 |        | Gm8894 |                                                        | X |   |   | 0 | 210 | 15 | 0  | 0  | 1.00 |      |      | 3    | 0  | 0  | 3  | 0  | 0  |
| IPI00918622.1 |        | Gm8994 | predicted gene, EG668137                               | X | X | X | 0 | 411 | 7  | 25 | 13 | 0.96 | 1.00 | 1.00 | 2    | 9  | 6  | 2  | 9  | 6  |
|               |        |        | similar to Glyceraldehyde-3-phosphate dehydrogenase    | X | X | X | 1 | 335 | 17 | 26 | 21 | 1.00 | 0.99 | 1.00 | 5    | 8  | 4  | 4  | 5  | 4  |
| IPI00753102.2 |        | Gm9034 |                                                        | X | X | X | 1 | 335 | 17 | 26 | 21 | 1.00 | 0.99 | 1.00 | 5    | 8  | 4  | 4  | 5  | 4  |
|               |        |        | similar to Acidic ribosomal phosphoprotein P0          | X |   | X | 1 | 313 | 7  | 0  | 27 | 0.01 |      | 0.90 | 2    | 0  | 7  | 2  | 0  | 7  |
| IPI00626504.2 |        | Gm9093 |                                                        | X |   | X | 1 | 313 | 7  | 0  | 27 | 0.01 |      | 0.90 | 2    | 0  | 7  | 2  | 0  | 7  |



|               |          |            |                                                          |  |   |   |      |    |      |    |    |    |      |      |      |    |    |    |    |    |    |
|---------------|----------|------------|----------------------------------------------------------|--|---|---|------|----|------|----|----|----|------|------|------|----|----|----|----|----|----|
| IPI00378480.1 | Q9ZQZ8   | H2afy      | Core histone macro-H2A.1                                 |  | X | X |      | 1  | 372  | 0  | 15 | 8  | 1.00 | 1.00 | 0    | 4  | 2  | 0  | 3  | 2  |    |
| IPI00223092.5 | Q8BMS1   | Hadha      | Trifunctional enzyme subunit alpha, mitochondrial        |  | X | X |      | 1  | 763  | 0  | 29 | 10 | 1.00 | 1.00 | 0    | 15 | 4  | 0  | 15 | 4  |    |
| IPI00115607.3 | Q99JY0   | Hadhb      | Trifunctional enzyme subunit beta, mitochondrial         |  | X |   |      | 0  | 475  | 0  | 4  | 0  | 1.00 |      | 0    | 2  | 0  | 0  | 2  | 0  |    |
| IPI00226930.2 | A2ATU9   | Hat1       | Histone aminotransferase 1                               |  | X | X |      | 2  | 423  | 0  | 16 | 9  | 1.00 | 1.00 | 0    | 4  | 3  | 0  | 4  | 3  |    |
| IPI00556802.1 | Q69ZS7   | Hbs1l      | Isoform 1 of HBS1-like protein                           |  | X |   | 2DLC | 1  | 682  | 13 | 0  | 0  | 0.93 |      | 4    | 0  | 0  | 4  | 0  | 0  |    |
| IPI00828490.2 | B1AUX2   | Hcfc1      | Host cell factor C1                                      |  | X |   |      | 0  | 2090 | 5  | 0  | 0  | 1.00 |      | 6    | 0  | 0  | 6  | 0  | 0  |    |
| IPI00114232.1 | O09106   | Hdac1      | Histone deacetylase 1                                    |  | X |   | X    | 0  | 482  | 17 | 0  | 4  | 1.00 | 1.00 | 7    | 0  | 2  | 6  | 0  | 2  |    |
| IPI00896654.1 | B2RRP3   | Hdac2      | histone deacetylase 2                                    |  | X |   |      | 0  | 488  | 15 | 0  | 0  | 1.00 |      | 8    | 0  | 0  | 6  | 0  | 0  |    |
| IPI00137694.5 | Q3SXD3   | Hddc2      | HD domain-containing protein 2                           |  | X |   |      | 0  | 199  | 14 | 0  | 0  | 0.99 |      | 2    | 0  | 0  | 2  | 0  | 0  |    |
| IPI00313817.1 | P51859   | Hdgf       | Hepatoma-derived growth factor                           |  | X |   |      | 0  | 237  | 41 | 0  | 0  | 1.00 |      | 7    | 0  | 0  | 7  | 0  | 0  |    |
| IPI00123379.1 | Q8VDJ3   | Hdlbp      | Vigilin                                                  |  | X | X |      | 0  | 1268 | 11 | 8  | 0  | 1.00 | 1.00 | 9    | 7  | 0  | 9  | 7  | 0  |    |
| IPI00411022.1 |          | Heatr1     | BAP28 protein                                            |  | X | X |      | 10 | 2143 | 0  | 18 | 9  | 1.00 | 1.00 | 0    | 27 | 12 | 0  | 27 | 12 |    |
| IPI00399686.1 | Q8BQM4   | Heatr3     | HEAT repeat-containing protein 3                         |  |   | X |      | 2  | 679  | 0  | 0  | 9  |      | 1.00 | 0    | 0  | 4  | 0  | 0  | 4  |    |
| IPI00121431.4 | Q60848   | Hells      | Lymphocyte-specific helicase                             |  | X | X |      | 1  | 821  | 0  | 3  | 6  | 1.00 | 1.00 | 0    | 3  | 4  | 0  | 3  | 4  |    |
| IPI00314989.2 | Q4U2R1   | Herc2      | Probable E3 ubiquitin-protein ligase                     |  |   | X |      | 10 | 4836 | 0  | 0  | 2  |      | 0.91 | 0    | 0  | 7  | 0  | 0  | 6  |    |
| IPI00649267.4 | Q3UMA3   | Hgs        | Putative uncharacterized protein                         |  | X |   |      | 0  | 776  | 7  | 0  | 0  | 1.00 |      | 4    | 0  | 0  | 4  | 0  | 0  |    |
| IPI00108189.4 | P70349   | Hint1      | Histidine triad nucleotide-binding protein 1             |  | X | X | X    | 0  | 126  | 39 | 17 | 27 | 1.00 | 1.00 | 1.00 | 5  | 2  | 2  | 3  | 2  | 2  |
| IPI00311726.3 | Q9JKY5   | Hip1r      | Huntingtin-interacting protein 1-related protein         |  |   | X |      | 0  | 1068 | 0  | 0  | 3  |      | 1.00 | 0    | 0  | 2  | 0  | 0  | 2  |    |
| IPI00886422.1 | P84228   | Hist1h     | Histone H3.2                                             |  | X |   |      | 0  | 135  | 0  | 50 | 0  | 0.96 |      | 0    | 6  | 0  | 0  | 6  | 0  |    |
| IPI00228616.5 | P43275   | Hist1h1a   | Histone H1.1                                             |  | X | X | X    | 0  | 213  | 19 | 19 | 26 | 1.00 | 1.00 | 1.00 | 5  | 5  | 6  | 5  | 5  | 6  |
| IPI00230133.5 | P43276   | Hist1h1b   | Histone H1.5                                             |  | X | X | X    | 0  | 223  | 15 | 32 | 18 | 1.00 | 1.00 | 1.00 | 3  | 9  | 4  | 3  | 9  | 4  |
| IPI00223713.5 | P15864   | Hist1h1c   | Histone H1.2                                             |  | X | X | X    | 0  | 212  | 24 | 16 | 24 | 1.00 | 1.00 | 1.00 | 8  | 4  | 5  | 8  | 4  | 5  |
| IPI00331597.6 | P43277   | Hist1h1d   | Histone H1.3                                             |  | X | X | X    | 0  | 221  | 15 | 29 | 23 | 1.00 | 1.00 | 1.00 | 6  | 9  | 5  | 6  | 9  | 5  |
| IPI00223714.5 | P43274   | Hist1h1e   | Histone H1.4                                             |  | X | X | X    | 0  | 219  | 16 | 28 | 19 | 1.00 | 1.00 | 1.00 | 5  | 8  | 4  | 5  | 8  | 4  |
| IPI00229542.1 | Q8CGP4   | Hist1h2aa  | Histone H2A                                              |  | X |   | X    | 1  | 129  | 36 | 0  | 50 | 1.00 | 0.97 | 8    | 0  | 4  | 8  | 0  | 4  |    |
| IPI00229543.3 | Q8CGP5   | Hist1h2af  | Histone H2A type 1-F                                     |  | X |   |      | 1  | 130  | 36 | 0  | 0  | 1.00 |      | 8    | 0  | 0  | 8  | 0  | 0  |    |
| IPI00111957.3 | P70696   | Hist1h2ba  | Histone H2B type 1-A                                     |  | X | X |      | 0  | 127  | 55 | 61 | 0  | 1.00 | 1.00 | 11   | 11 | 0  | 10 | 11 | 0  |    |
| IPI00761713.2 | Q8CGP2-2 | Hist1h2bp  | Histone H2B type 1-P                                     |  | X | X | X    | 0  | 138  | 51 | 19 | 38 | 1.00 | 1.00 | 1.00 | 13 | 2  | 9  | 10 | 2  | 6  |
| IPI00459318.1 | Q8C622   | Hist1h2bp  | Putative uncharacterized protein                         |  | X | X |      | 0  | 145  | 12 | 19 | 0  | 0.01 | 1.00 | 3    | 4  | 0  | 3  | 4  | 0  |    |
| IPI00553538.3 | P68433   | Hist1h3a   | Histone H3.1                                             |  |   | X | X    | 0  | 136  | 0  | 50 | 50 | 1.00 | 1.00 | 0    | 10 | 10 | 0  | 6  | 6  |    |
| IPI00330000.4 | Q6GSS7   | Hist2h2aa2 | Histone H2A type 2-A                                     |  | X | X |      | 1  | 130  | 55 | 55 | 0  | 1.00 | 0.97 | 7    | 6  | 0  | 7  | 5  | 0  |    |
| IPI00623951.3 | Q64522   | Hist2h2ab  | Histone H2A type 2-B                                     |  | X | X | X    | 1  | 130  | 53 | 52 | 53 | 1.00 | 1.00 | 1.00 | 6  | 6  | 6  | 6  | 5  | 6  |
| IPI00282848.1 | Q8CGN9   | Hist2h3c1  | histone cluster 2, H3c1                                  |  | X | X |      | 0  | 181  | 0  | 38 | 38 | 1.00 | 1.00 | 0    | 7  | 7  | 0  | 6  | 6  |    |
| IPI00379693.1 | P84228   | Hist2h3c1  | Histone H3.2                                             |  | X |   |      | 0  | 136  | 0  | 50 | 0  | 0.98 |      | 0    | 6  | 0  | 0  | 6  | 0  |    |
| IPI00283611.1 | P17710   | Hk1        | Hexokinase-1                                             |  | X |   |      | 1  | 974  | 0  | 6  | 0  | 1.00 |      | 0    | 5  | 0  | 0  | 5  | 0  |    |
| IPI00114342.1 | O08528   | Hk2        | Hexokinase-2                                             |  |   | X | X    | 0  | 917  | 0  | 19 | 3  | 1.00 | 1.00 | 0    | 14 | 2  | 0  | 14 | 2  |    |
| IPI00408022.4 | Q3TIV0   | Hmbs       | Hydroxymethylbilane synthase                             |  |   | X |      | 1  | 361  | 0  | 0  | 10 |      | 1.00 | 0    | 0  | 2  | 0  | 0  | 2  |    |
| IPI00467235.4 | Q8C716   | Hmcn1      | hemicentin 1                                             |  |   | X |      | 4  | 5635 | 0  | 0  | 3  |      | 0.95 | 0    | 0  | 10 | 0  | 0  | 10 |    |
| IPI00314240.5 | P17095   | Hmga1-rs1  | Isoform HMG-I of High mobility group protein HMG-I/HMG-Y |  |   | X | UF   | 0  | 107  | 0  | 0  | 22 |      | 0.95 | 0    | 0  | 3  | 0  | 0  | 3  |    |
| IPI00462291.5 | P30681   | Hmgb2      | High mobility group protein B2                           |  | X | X |      | 0  | 210  | 0  | 31 | 16 | 1.00 | 1.00 | 0    | 7  | 3  | 0  | 6  | 3  |    |
| IPI00752490.1 | Q8VDR2   | Hmmr       | Hmmr protein                                             |  | X |   |      | 0  | 836  | 14 | 0  | 0  | 1.00 |      | 6    | 0  | 0  | 6  | 0  | 0  |    |
| IPI00314755.5 | P97825   | Hn1        | Hematological and neurological expressed 1 protein       |  | X |   |      | 0  | 154  | 65 | 0  | 0  | 1.00 |      | 7    | 0  | 0  | 6  | 0  | 0  |    |
| IPI00109813.1 | Q9CX86   | Hnrnpa0    | heterogeneous nuclear ribonucleoprotein A0               |  | X | X | X    | 0  | 305  | 14 | 28 | 14 | 1.00 | 1.00 | 1.00 | 3  | 5  | 3  | 3  | 5  | 3  |
| IPI00553777.2 | Q3UK83   | Hnrnpa1    | Putative uncharacterized protein                         |  | X | X | X    | 0  | 373  | 39 | 44 | 27 | 1.00 | 1.00 | 1.00 | 19 | 19 | 10 | 17 | 16 | 10 |
| IPI00889986.1 | P49312   | Hnrnpa1    | Heterogeneous nuclear ribonucleoprotein A1               |  | X |   |      | 0  | 193  | 44 | 0  | 0  | 1.00 |      | 9    | 0  | 0  | 7  | 0  | 0  |    |
| IPI00269661.1 | Q8BG05   | Hnrnpa3    | Heterogeneous nuclear ribonucleoprotein A3               |  | X | X |      | 0  | 379  | 38 | 26 | 0  | 1.00 | 1.00 | 20   | 13 | 0  | 18 | 11 | 0  |    |
| IPI00277066.4 | Q20BD0   | Hnrnpab    | Heterogeneous nuclear ribonucleoprotein A/B              |  | X | X | X    | 0  | 332  | 31 | 28 | 17 | 1.00 | 1.00 | 1.00 | 17 | 9  | 4  | 16 | 9  | 4  |

|               |          |          |                                                                       |  |   |   |   |               |      |     |    |    |      |      |      |      |    |    |    |    |    |    |
|---------------|----------|----------|-----------------------------------------------------------------------|--|---|---|---|---------------|------|-----|----|----|------|------|------|------|----|----|----|----|----|----|
| IPI00130343.2 | Q3U6P5   | Hnrnpc   | Putative uncharacterized protein                                      |  | X | X |   | 0             | 334  | 0   | 24 | 15 | 1.00 | 1.00 | 0    | 9    | 5  | 0  | 8  | 5  |    |    |
| IPI00330958.2 | Q60668   | Hnrnpd   | Heterogeneous nuclear ribonucleoprotein D0                            |  | X | X | X | 0             | 355  | 23  | 11 | 8  | 1.00 | 1.00 | 1.00 | 13   | 4  | 3  | 11 | 4  | 3  |    |
| IPI00226073.2 | Q9Z2X1   | Hnrmpf   | Heterogeneous nuclear ribonucleoprotein F                             |  | X | X | X | 0             | 415  | 19  | 33 | 19 | 1.00 | 1.00 | 1.00 | 8    | 10 | 6  | 6  | 9  | 6  |    |
| IPI00224729.1 | Q8C2Q7   | Hnrmp1   | Putative uncharacterized protein                                      |  | X | X | X | 0             | 472  | 22  | 23 | 15 | 1.00 | 1.00 | 1.00 | 8    | 6  | 5  | 7  | 6  | 5  |    |
| IPI00108143.1 | P70333   | Hnrmp2   | Heterogeneous nuclear ribonucleoprotein H2                            |  | X |   |   | 0             | 449  | 16  | 0  | 0  | 1.00 |      |      | 7    | 0  | 0  | 5  | 0  | 0  |    |
| IPI00224575.1 | P61979-2 | Hnrmpk   | Heterogeneous nuclear ribonucleoprotein K                             |  | X | X | X | 0             | 464  | 22  | 44 | 36 | 1.00 | 1.00 | 1.00 | 7    | 14 | 10 | 7  | 14 | 10 |    |
| IPI00620362.4 | Q8R081   | Hnrnpl   | Heterogeneous nuclear ribonucleoprotein L                             |  | X | X | X | 0             | 586  | 13  | 46 | 18 | 1.00 | 1.00 | 1.00 | 6    | 18 | 6  | 5  | 17 | 6  |    |
| IPI00132443.3 | Q9D0E1   | Hnrnrm   | Heterogeneous nuclear ribonucleoprotein M                             |  | X | X | X | 0             | 729  | 15  | 19 | 10 | 1.00 | 1.00 | 1.00 | 10   | 13 | 5  | 9  | 13 | 5  |    |
| IPI00128441.3 | Q8VHM5   | Hnrnpr   | Putative uncharacterized protein                                      |  | X | X |   | 0             | 632  | 12  | 12 | 0  | 1.00 | 1.00 |      | 5    | 6  | 0  | 5  | 6  | 0  |    |
| IPI00458583.3 | Q8VEK3   | Hnrnpu   | Putative uncharacterized protein                                      |  |   | X | X | 0             | 800  | 0   | 30 | 22 | 1.00 | 1.00 |      | 0    | 22 | 14 | 0  | 22 | 14 |    |
| IPI00123501.3 | Q8VDM6   | Hnrnpul1 | Isoform 1 of Heterogeneous nuclear ribonucleoprotein U-like protein 1 |  | X |   |   | 2DLC          | 0    | 859 | 14 | 0  | 0    | 1.00 |      |      | 7  | 0  | 0  | 7  | 0  | 0  |
| IPI00755892.1 | Q9Z130   | Hnrpdl   | heterogeneous nuclear ribonucleoprotein D-like                        |  | X | X | X | 0             | 420  | 24  | 4  | 6  | 1.00 | 0.99 | 1.00 | 11   | 2  | 2  | 9  | 2  | 2  |    |
| IPI00395047.1 | Q99JP6-2 | Homer3   | Homer protein homolog 3                                               |  | X |   |   | 0             | 359  | 12  | 0  | 0  | 1.00 |      |      | 2    | 0  | 0  | 2  | 0  | 0  |    |
| IPI00284806.8 | P00493   | Hprt1    | Hypoxanthine-guanine phosphoribosyltransferase                        |  | X | X | X | 0             | 218  | 18  | 30 | 18 | 1.00 | 1.00 | 1.00 | 3    | 5  | 3  | 3  | 5  | 3  |    |
| IPI00128484.1 | Q91X72   | Hpx      | Hemopexin                                                             |  | X |   |   | 0             | 460  | 5   | 0  | 0  | 1.00 |      |      | 3    | 0  | 0  | 3  | 0  | 0  |    |
| IPI00130235.2 | Q3TC93   | Hs1bp3   | HCLS1-binding protein 3                                               |  | X |   |   | 0             | 396  | 10  | 0  | 0  | 0.97 |      |      | 2    | 0  | 0  | 2  | 0  | 0  |    |
| IPI00170051.2 | Q8K3A0   | Hscb     | Co-chaperone protein HscB, mitochondrial                              |  | X |   |   | 0             | 234  | 14  | 0  | 0  | 0.98 |      |      | 2    | 0  | 0  | 2  | 0  | 0  |    |
| IPI00830581.1 | Q99N15   | Hsd17b10 | hydroxyacyl-Coenzyme A dehydrogenase type II                          |  |   | X |   | 2             | 261  | 0   | 32 | 0  | 1.00 |      |      | 0    | 4  | 0  | 0  | 4  | 0  |    |
| IPI00119219.2 | O70503   | Hsd17b12 | Isoform 1 of Estradiol 17-beta-dehydrogenase 12                       |  |   | X | X | 1DE           | 2    | 312 | 0  | 13 | 9    | 1.00 | 0.98 | 0    | 3  | 2  | 0  | 3  | 2  |    |
| IPI00331628.5 | P51660   | Hsd17b4  | Peroxisomal multifunctional enzyme type 2                             |  |   |   | X | 0             | 735  | 0   | 0  | 5  |      | 1.00 | 0    | 0    | 2  | 0  | 0  | 0  | 2  |    |
| IPI00330804.4 | P07901   | Hsp90aa1 | Heat shock protein HSP 90-alpha                                       |  | X | X | X | 2             | 733  | 29  | 58 | 51 | 1.00 | 1.00 | 1.00 | 19   | 49 | 32 | 17 | 42 | 30 |    |
| IPI00229080.7 | Q71LX8   | Hsp90ab1 | MCG18238                                                              |  | X | X | X | 3             | 724  | 25  | 54 | 53 | 1.00 | 1.00 | 1.00 | 17   | 43 | 30 | 16 | 40 | 30 |    |
| IPI00129526.1 | P08113   | Hsp90b1  | Endoplasmic                                                           |  | X | X | X | 1             | 802  | 11  | 33 | 16 | 1.00 | 1.00 | 1.00 | 6    | 23 | 11 | 6  | 23 | 11 |    |
| IPI00652428.1 | Q99M31-2 | Hspa14   | Heat shock 70 kDa protein 14                                          |  |   |   | X | 0             | 515  | 0   | 0  | 6  |      | 1.00 | 0    | 0    | 2  | 0  | 0  | 2  |    |    |
| IPI00346073.1 | P17879   | Hspa1b   | Heat shock 70 kDa protein 1B                                          |  | X |   | X | 0             | 642  | 8   | 0  | 15 | 1.00 | 0.97 | 3    | 0    | 6  | 3  | 0  | 6  |    |    |
| IPI00133208.3 | P16627   | Hspa1l   | Heat shock 70 kDa protein 1L                                          |  | X |   |   | 0             | 641  | 4   | 0  | 0  | 0.00 |      |      | 2    | 0  | 0  | 2  | 0  | 0  |    |
| IPI00331556.5 | Q61316   | Hspa4    | Heat shock 70 kDa protein 4                                           |  | X | X | X | 0             | 841  | 28  | 47 | 26 | 1.00 | 1.00 | 1.00 | 18   | 27 | 17 | 15 | 27 | 17 |    |
| IPI00317710.1 | P48722   | Hspa4l   | Heat shock 70 kDa protein 4L                                          |  | X |   |   | 1             | 838  | 5   | 0  | 0  | 0.90 |      |      | 4    | 0  | 0  | 3  | 0  | 0  |    |
| IPI00319992.1 | P20029   | Hspa5    | 78 kDa glucose-regulated protein                                      |  | X | X | X | 0             | 655  | 42  | 45 | 25 | 1.00 | 1.00 | 1.00 | 25   | 24 | 12 | 22 | 24 | 12 |    |
| IPI00323357.3 | P63017   | Hspa8    | Heat shock cognate 71 kDa protein                                     |  | X | X | X | 0             | 646  | 53  | 67 | 55 | 1.00 | 1.00 | 1.00 | 26   | 40 | 29 | 23 | 36 | 28 |    |
| IPI00880839.1 | Q7TSZ0   | Hspa9    | heat shock protein 9                                                  |  | X | X | X | 0             | 679  | 6   | 49 | 33 | 1.00 | 1.00 | 1.00 | 3    | 31 | 17 | 3  | 27 | 17 |    |
| IPI00128522.1 | P14602   | Hspb1    | Isoform A of Heat shock protein beta-1                                |  | X | X | X | 2DLC, 1DE, UF | 0    | 209 | 82 | 65 | 71   | 1.00 | 1.00 | 1.00 | 15 | 10 | 11 | 15 | 10 | 11 |
| IPI00308885.6 | P63038   | Hspd1    | Isoform 1 of 60 kDa heat shock protein, mitochondrial                 |  | X | X | X | 2DLC, 1DE, UF | 1    | 573 | 14 | 57 | 48   | 1.00 | 1.00 | 1.00 | 7  | 36 | 22 | 4  | 29 | 22 |
| IPI00263863.8 | Q64433   | Hspe1    | 10 kDa heat shock protein, mitochondrial                              |  | X | X | X | 0             | 102  | 57  | 71 | 33 | 1.00 | 1.00 | 1.00 | 6    | 9  | 3  | 6  | 9  | 3  |    |
| IPI00515360.8 | Q05793   | Hspg2    | perlecan                                                              |  |   | X |   | 1             | 4383 | 0   | 2  | 0  | 1.00 |      |      | 0    | 6  | 0  | 0  | 6  | 0  |    |
| IPI00123802.5 | Q61699   | Hsph1    | Isoform HSP105-alpha of Heat shock protein 105 kDa                    |  | X | X | X | 2DLC          | 0    | 858 | 21 | 11 | 8    | 1.00 | 1.00 | 1.00 | 10 | 8  | 5  | 10 | 8  | 5  |
| IPI00271166.4 | P42858   | Htt      | huntingtin                                                            |  | X |   |   | 11            | 3120 | 1   | 0  | 0  | 0.98 |      |      | 2    | 0  | 0  | 2  | 0  | 0  |    |
| IPI00463909.3 | A2AFQ0   | Huwe1    | HECT, UBA and WWE domain containing 1                                 |  |   | X | X | 11            | 4378 | 0   | 6  | 2  | 1.00 | 1.00 | 0    | 18   | 3  | 0  | 18 | 3  |    |    |
| IPI00319167.7 | Q80W93   | Hydin    | hydrocephalus inducing                                                |  |   | X |   | 5             | 5154 | 0   | 0  | 1  | 0.94 |      |      | 0    | 0  | 5  | 0  | 0  | 5  |    |

|               |          |         |                                                                          |   |   |   |      |   |      |    |    |    |      |      |      |    |    |    |    |    |    |
|---------------|----------|---------|--------------------------------------------------------------------------|---|---|---|------|---|------|----|----|----|------|------|------|----|----|----|----|----|----|
| IPI00123342.4 | Q9JKR6   | Hyou1   | Hypoxia up-regulated protein 1                                           | X | X | X |      | 0 | 999  | 27 | 7  | 6  | 1.00 | 1.00 | 1.00 | 21 | 5  | 3  | 19 | 5  | 3  |
| IPI00225201.5 | Q8BU30   | lars    | Isoleucyl-tRNA synthetase, cytoplasmic                                   |   | X | X |      | 3 | 1262 | 0  | 7  | 6  | 1.00 | 1.00 | 0    | 6  | 4  | 0  | 6  | 4  | 4  |
| IPI00453499.3 | Q8BIJ6   | lars2   | Isoleucyl-tRNA synthetase, mitochondrial                                 |   | X | X |      | 2 | 1012 | 0  | 11 | 5  | 1.00 | 0.99 | 0    | 5  | 4  | 0  | 5  | 4  | 4  |
| IPI00828796.1 | Q8CGB9   | lde     | insulin-degrading enzyme                                                 |   |   | X |      | 1 | 1019 | 0  | 0  | 4  | 1.00 | 0    | 0    | 4  | 0  | 0  | 4  | 0  | 4  |
| IPI00135231.2 | Q8C338   | ldh1    | Putative uncharacterized protein                                         |   |   | X |      | 0 | 422  | 0  | 0  | 5  | 1.00 | 0    | 0    | 2  | 0  | 0  | 0  | 0  | 2  |
| IPI00875110.1 | P93032   | ldh2    | Isocitrate dehydrogenase [NAD] regulatory subunit 2, mitochondrial (     |   |   |   | X    | 0 | 469  | 0  | 0  | 13 | 1.00 | 0    | 0    | 4  | 0  | 0  | 0  | 0  | 4  |
| IPI00459725.2 | Q9D6R2   | ldh3a   | Isoform 1 of Isocitrate dehydrogenase [NAD] subunit alpha, mitochondrial |   | X |   | 1DE  | 2 | 366  | 0  | 11 | 0  | 1.00 | 0    | 0    | 4  | 0  | 0  | 4  | 0  | 0  |
| IPI00109169.1 | P70404   | ldh3g   | Isocitrate dehydrogenase [NAD] subunit gamma, mitochondrial              |   | X |   |      | 0 | 393  | 0  | 3  | 0  | 1.00 | 0    | 0    | 2  | 0  | 0  | 2  | 0  | 0  |
| IPI00131056.1 | O88477   | lgf2bp1 | Insulin-like growth factor 2 mRNA-binding protein 1                      | X | X | X |      | 1 | 577  | 22 | 37 | 32 | 1.00 | 1.00 | 1.00 | 10 | 19 | 16 | 10 | 18 | 16 |
| IPI00761863.1 | Q5SF07   | lgf2bp2 | Isoform 1 or 3 of Insulin-like growth factor 2 mRNA-binding protein 2    | X |   |   | 2DLC | 1 | 592  | 14 | 0  | 0  | 1.00 | 0    | 0    | 5  | 0  | 0  | 5  | 0  | 0  |
| IPI00331315.9 | Q9CPN8   | lgf2bp3 | Insulin-like growth factor 2 mRNA-binding protein 3                      | X | X |   |      | 0 | 579  | 6  | 4  | 0  | 0.99 | 1.00 | 0    | 2  | 2  | 0  | 2  | 2  | 0  |
| IPI00308971.1 | Q07113   | lgf2r   | Cation-independent mannose-6-phosphate receptor                          |   | X |   |      | 2 | 2483 | 0  | 4  | 0  | 1.00 | 0    | 0    | 7  | 0  | 0  | 7  | 0  | 0  |
| IPI00463186.7 |          | lgsf9b  | immunoglobulin superfamily, member 9B                                    |   |   |   | X    | 3 | 1328 | 0  | 0  | 6  | 0.92 | 0    | 0    | 5  | 0  | 0  | 0  | 0  | 5  |
| IPI00127947.3 | Q95H93   | lk      | lK cytokine                                                              | X |   | X |      | 0 | 557  | 21 | 0  | 3  | 1.00 | 1.00 | 9    | 0  | 2  | 8  | 0  | 2  | 2  |
| IPI00831040.1 | Q7TSS3   | lkbkg   | Inhibitor of kappaB kinase gamma                                         | X |   |   |      | 0 | 430  | 16 | 0  | 0  | 1.00 | 0    | 0    | 5  | 0  | 0  | 5  | 0  | 0  |
| IPI00875742.1 | Q3UXI9   | llf2    | Putative uncharacterized protein                                         |   | X | X |      | 2 | 390  | 0  | 23 | 20 | 1.00 | 1.00 | 0    | 6  | 5  | 0  | 5  | 5  | 5  |
| IPI00130591.2 | Q9Z1X4-3 | llf3    | Isoform 1 or 3 of Interleukin enhancer-binding factor 3                  | X | X | X | 2DLC | 0 | 911  | 16 | 6  | 4  | 1.00 | 1.00 | 0.99 | 8  | 5  | 4  | 8  | 5  | 4  |
| IPI00381412.1 | Q8CAQ8-2 | lmmt    | Mitochondrial inner membrane protein                                     |   | X |   |      | 1 | 746  | 0  | 48 | 0  | 1.00 | 0    | 0    | 26 | 0  | 0  | 26 | 0  | 0  |
| IPI00122383.1 | Q921Y2   | lmp3    | U3 small nucleolar ribonucleoprotein protein IMP3                        | X |   |   |      | 0 | 184  | 35 | 0  | 0  | 1.00 | 0    | 0    | 6  | 0  | 0  | 5  | 0  | 0  |
| IPI00395166.2 | Q8VHZ7   | lmp4    | U3 small nucleolar ribonucleoprotein protein IMP4                        | X |   |   |      | 0 | 291  | 33 | 0  | 0  | 1.00 | 0    | 0    | 6  | 0  | 0  | 6  | 0  | 0  |
| IPI00319956.1 | O55091   | lmpact  | Protein IMPACT                                                           | X |   |   |      | 0 | 318  | 15 | 0  | 0  | 1.00 | 0    | 0    | 2  | 0  | 0  | 2  | 0  | 0  |
| IPI00323971.2 | P24547   | lmpdh2  | Inosine-5'-monophosphate dehydrogenase 2                                 | X | X | X |      | 2 | 514  | 7  | 33 | 30 | 0.99 | 1.00 | 1.00 | 3  | 12 | 13 | 3  | 12 | 13 |
| IPI00135965.2 | P46660   | lna     | Alpha-internexin                                                         | X |   |   |      | 0 | 504  | 6  | 0  | 0  | 1.00 | 0    | 0    | 2  | 0  | 0  | 2  | 0  | 0  |
| IPI00265986.1 | Q9WU62   | lncenp  | Inner centromere protein                                                 | X |   | X |      | 1 | 880  | 4  | 0  | 3  | 0.99 | 1.00 | 2    | 0  | 2  | 2  | 0  | 2  | 2  |
| IPI00877221.2 | Q6P4S8   | Ints1   | Isoform 1 of Integrator complex subunit 1                                |   |   | X | UF   | 5 | 2222 | 0  | 0  | 1  | 0.97 | 0    | 0    | 2  | 0  | 0  | 0  | 0  | 2  |
| IPI00355368.4 | Q8K2V6-2 | lpo11   | Importin-11                                                              |   |   | X |      | 3 | 984  | 0  | 0  | 4  | 1.00 | 0    | 0    | 3  | 0  | 0  | 0  | 0  | 2  |
| IPI00128880.3 | Q8VI75   | lpo4    | Importin-4                                                               |   |   | X |      | 3 | 1082 | 0  | 0  | 8  | 1.00 | 0    | 0    | 7  | 0  | 0  | 0  | 0  | 7  |
| IPI00626994.3 | Q8BKCS   | lpo5    | Isoform 1 of Importin-5                                                  |   | X | X | 1DE  | 0 | 1097 | 0  | 23 | 15 | 1.00 | 1.00 | 0    | 17 | 13 | 0  | 17 | 12 | 12 |
| IPI00331444.7 | Q9EPL8   | lpo7    | Importin-7                                                               |   | X | X |      | 2 | 1038 | 0  | 12 | 11 | 1.00 | 1.00 | 0    | 7  | 8  | 0  | 7  | 8  | 8  |
| IPI00130158.3 | Q91YE6   | lpo9    | Importin-9                                                               |   | X | X |      | 6 | 1041 | 0  | 6  | 5  | 1.00 | 1.00 | 0    | 2  | 3  | 0  | 2  | 3  | 3  |
| IPI00467447.3 | Q9JKF1   | lqqap1  | Ras GTPase-activating-like protein IQGAP1                                | X | X | X |      | 1 | 1657 | 3  | 4  | 6  | 1.00 | 1.00 | 1.00 | 3  | 5  | 9  | 3  | 5  | 9  |
| IPI00854942.1 |          | lrf2bp2 | similar to interferon regulatory factor 2 binding protein 2              | X |   |   |      | 1 | 763  | 8  | 0  | 0  | 1.00 | 0    | 0    | 3  | 0  | 0  | 3  | 0  | 0  |
| IPI00222565.2 | Q3U1G5   | lsg20l2 | unnamed protein product                                                  | X |   |   |      | 0 | 369  | 14 | 0  | 0  | 1.00 | 0    | 0    | 3  | 0  | 0  | 3  | 0  | 0  |
| IPI00469994.2 | Q69ZQ2   | lsy1    | Pre-mRNA-splicing factor ISY1 homolog                                    | X |   |   |      | 0 | 285  | 11 | 0  | 0  | 0.99 | 0    | 0    | 2  | 0  | 0  | 2  | 0  | 0  |
| IPI00119886.1 | Q9JHU9   | lsyna1  | Inositol-3-phosphate synthase 1                                          |   |   | X | X    | 1 | 557  | 0  | 9  | 9  | 1.00 | 1.00 | 0    | 3  | 3  | 0  | 3  | 3  | 3  |
| IPI00420835.3 | Q61739   | ltga6   | Integrin alpha-6                                                         | X |   |   |      | 2 | 1091 | 4  | 0  | 0  | 1.00 | 0    | 0    | 3  | 0  | 0  | 3  | 0  | 0  |
| IPI00132474.3 | P09055   | ltgb1   | Integrin beta-1                                                          |   | X | X |      | 1 | 798  | 0  | 7  | 5  | 1.00 | 0.99 | 0    | 4  | 2  | 0  | 4  | 4  | 2  |
| IPI00227834.8 | Q61703   | ltih2   | Inter-alpha-trypsin inhibitor heavy chain H2                             | X |   |   |      | 1 | 946  | 3  | 0  | 0  | 1.00 | 0    | 0    | 2  | 0  | 0  | 2  | 0  | 0  |

|               |        |        |                                                                             |   |   |   |   |    |  |   |      |    |    |    |      |      |      |    |    |    |    |    |
|---------------|--------|--------|-----------------------------------------------------------------------------|---|---|---|---|----|--|---|------|----|----|----|------|------|------|----|----|----|----|----|
| IPI00831223.1 | Q9Z0R4 | Itns1  | Intersectin-1                                                               | X |   |   |   |    |  | 1 | 1719 | 2  | 0  | 0  | 0.99 |      | 2    | 0  | 0  | 2  | 0  | 0  |
| IPI00124575.1 | Q62315 | Jarid2 | Protein Jumonji                                                             | X |   | X |   |    |  | 1 | 1234 | 4  | 0  | 3  | 1.00 | 0.92 | 2    | 0  | 2  | 2  | 0  | 2  |
| IPI00453693.2 | Q91XC0 | Jub    | Protein ajuba                                                               | X |   |   |   |    |  | 0 | 547  | 13 | 0  | 0  | 1.00 |      | 4    | 0  | 0  | 4  | 0  | 0  |
| IPI00229475.1 | Q02257 | Jup    | Junction plakoglobin                                                        | X | X | X |   |    |  | 0 | 745  | 23 | 9  | 10 | 1.00 | 1.00 | 1.00 | 11 | 5  | 5  | 10 | 5  |
| IPI00469103.1 | Q8R2P8 | Kars   | Lysyl-tRNA synthetase                                                       |   | X | X |   |    |  | 0 | 624  | 0  | 18 | 8  | 1.00 | 1.00 | 0    | 9  | 4  | 0  | 9  | 4  |
| IPI00460716.2 | Q6PCM1 | Kdm3a  | Lysine-specific demethylase 3A                                              |   |   | X |   |    |  | 1 | 1323 | 0  | 0  | 7  |      | 1.00 | 0    | 0  | 4  | 0  | 0  | 4  |
|               |        |        | Isoform 1 of Lysine-specific demethylase                                    |   |   |   |   |    |  |   |      |    |    |    |      |      |      |    |    |    |    |    |
| IPI00648673.4 | Q8BW72 | Kdm4a  | 4A                                                                          |   |   | X |   | UF |  | 0 | 1064 | 0  | 0  | 4  |      | 0.90 | 0    | 0  | 2  | 0  | 0  | 2  |
| IPI00330824.9 | Q80Y84 | Kdm5b  | Lysine-specific demethylase 5B                                              |   |   | X |   |    |  | 1 | 1544 | 0  | 2  | 0  |      | 0.99 | 0    | 2  | 0  | 0  | 2  | 0  |
|               |        |        | KH domain-containing, RNA-binding, signal transduction-associated protein 1 | X |   |   |   |    |  | 0 | 443  | 8  | 0  | 0  | 1.00 |      | 3    | 0  | 0  | 3  | 0  | 0  |
|               |        |        | KH domain-containing, RNA-binding, signal transduction-associated protein 3 | X |   |   |   |    |  | 0 | 346  | 7  | 0  | 0  | 1.00 |      | 2    | 0  | 0  | 2  | 0  | 0  |
|               |        |        | KH type splicing regulatory protein KSRP                                    | X | X | X |   |    |  | 0 | 671  | 15 | 12 | 12 | 1.00 | 1.00 | 1.00 | 8  | 8  | 7  | 7  | 7  |
|               |        |        | Far upstream element-binding protein 2                                      | X | X |   |   |    |  | 0 | 748  | 18 | 12 | 0  | 1.00 | 1.00 |      | 9  | 8  | 0  | 8  | 7  |
| IPI00462934.2 | Q3U0V1 | Khsrp  | Far upstream element-binding protein 2                                      | X | X |   |   |    |  | 0 | 748  | 18 | 12 | 0  | 1.00 | 1.00 |      | 9  | 8  | 0  | 8  | 7  |
| IPI00130218.2 | Q6P9P6 | Kif11  | Kinesin-like protein KIF11                                                  |   |   | X |   |    |  | 0 | 1052 | 0  | 0  | 5  |      | 1.00 | 0    | 0  | 4  | 0  | 0  | 4  |
| IPI00626501.3 | Q3UH16 | Kif1a  | Putative uncharacterized protein                                            |   |   | X |   |    |  | 1 | 1698 | 0  | 0  | 4  |      | 0.99 | 0    | 0  | 4  | 0  | 0  | 4  |
| IPI00407864.2 | Q80V30 | Kif23  | Kinesin family member 23                                                    |   |   | X |   |    |  | 0 | 953  | 0  | 0  | 3  |      | 0.91 | 0    | 0  | 2  | 0  | 0  | 2  |
| IPI00881982.1 | P28740 | Kif2a  | Kinesin-like protein KIF2A                                                  |   | X |   |   |    |  | 0 | 660  | 13 | 0  | 0  | 1.00 |      | 6    | 0  | 0  | 6  | 0  | 0  |
| IPI00123365.1 | Q922S8 | Kif2c  | Kinesin-like protein KIF2C                                                  |   | X |   |   |    |  | 0 | 721  | 6  | 0  | 0  | 1.00 |      | 3    | 0  | 0  | 3  | 0  | 0  |
| IPI00881456.1 | Q80YP3 | Kif4   | kinesin family member 4                                                     |   | X |   |   |    |  | 0 | 1231 | 3  | 0  | 0  | 1.00 |      | 2    | 0  | 0  | 2  | 0  | 0  |
| IPI00555125.1 | Q5BL10 | Kif5b  | Kinesin family member 5B                                                    |   | X |   | X |    |  | 0 | 963  | 4  | 0  | 5  | 1.00 | 1.00 | 3    | 0  | 3  | 3  | 0  | 3  |
| IPI00620804.2 | Q7M6Z6 | Klc1   | Kinesin light chain 1T (Fragment)                                           |   | X |   |   |    |  | 0 | 636  | 15 | 0  | 0  | 1.00 |      | 7    | 0  | 0  | 6  | 0  | 0  |
| IPI00120089.1 | Q9DBS5 | Klc4   | Kinesin light chain 4                                                       |   | X |   |   |    |  | 0 | 619  | 9  | 0  | 0  | 1.00 |      | 3    | 0  | 0  | 3  | 0  | 0  |
| IPI00311329.1 | Q60960 | Kpna1  | Importin subunit alpha-1                                                    |   |   |   | X |    |  | 3 | 538  | 0  | 0  | 11 |      | 1.00 | 0    | 0  | 3  | 0  | 0  | 3  |
| IPI00230429.4 | O35344 | Kpna3  | Importin subunit alpha-3                                                    |   |   |   | X |    |  | 1 | 521  | 0  | 0  | 18 |      | 1.00 | 0    | 0  | 4  | 0  | 0  | 4  |
| IPI00129792.1 | O35343 | Kpna4  | Importin subunit alpha-4                                                    |   |   |   | X |    |  | 1 | 521  | 0  | 8  | 0  | 1.00 |      | 0    | 2  | 0  | 0  | 2  | 0  |
| IPI00323881.1 | P70168 | Kpnb1  | Importin subunit beta-1                                                     |   |   |   | X | X  |  | 0 | 876  | 0  | 45 | 30 | 1.00 | 1.00 | 0    | 28 | 19 | 0  | 24 | 19 |
| IPI00625729.2 | P04104 | Krt1   | Keratin, type II cytoskeletal 1                                             |   | X | X |   |    |  | 0 | 637  | 7  | 6  | 0  | 1.00 | 1.00 | 6    | 5  | 0  | 6  | 5  | 0  |
| IPI00798492.2 | P02535 | Krt10  | Keratin, type I cytoskeletal 10                                             |   | X | X | X |    |  | 0 | 570  | 11 | 10 | 7  | 1.00 | 1.00 | 0.94 | 7  | 8  | 3  | 6  | 7  |
| IPI00227140.1 | Q61781 | Krt14  | Keratin, type I cytoskeletal 14                                             |   | X |   |   |    |  | 1 | 484  | 30 | 0  | 0  | 1.00 |      | 17   | 0  | 0  | 13 | 0  | 0  |
| IPI00828528.1 | Q61782 | Krt14  | Type I epidermal keratin (Fragment)                                         |   | X |   |   |    |  | 0 | 93   | 54 | 0  | 0  | 1.00 |      | 4    | 0  | 0  | 4  | 0  | 0  |
| IPI00225378.3 | B1AQ77 | Krt15  | Keratin 15                                                                  |   | X |   |   |    |  | 1 | 456  | 14 | 0  | 0  | 0.98 |      | 10   | 0  | 0  | 8  | 0  | 0  |
| IPI00131209.3 | Q9EQD6 | Krt16  | Keratin intermediate filament 16a                                           |   | X |   |   |    |  | 1 | 474  | 18 | 0  | 0  | 1.00 |      | 10   | 0  | 0  | 8  | 0  | 0  |
| IPI00230365.5 | Q9QWL7 | Krt17  | Keratin, type I cytoskeletal 17                                             |   | X | X |   |    |  | 0 | 433  | 52 | 12 | 0  | 1.00 | 1.00 | 25   | 5  | 0  | 20 | 5  | 0  |
| IPI00311493.5 | P05784 | Krt18  | Keratin, type I cytoskeletal 18                                             |   | X |   | X |    |  | 0 | 423  | 22 | 0  | 40 | 1.00 | 1.00 | 6    | 0  | 14 | 6  | 0  | 14 |
| IPI00112947.1 | P19001 | Krt19  | Keratin, type I cytoskeletal 19                                             |   | X | X | X |    |  | 0 | 403  | 16 | 12 | 23 | 1.00 | 1.00 | 1.00 | 7  | 3  | 8  | 6  | 3  |
|               |        |        | Keratin, type II cytoskeletal 2 epidermal                                   | X | X |   |   |    |  | 0 | 707  | 6  | 10 | 0  | 1.00 | 1.00 |      | 5  | 7  | 0  | 5  | 7  |
| IPI00462134.3 | Q6IFX3 | Krt40  | Keratin, type I cytoskeletal 40                                             |   |   | X |   |    |  | 0 | 439  | 0  | 5  | 0  | 0.95 |      | 0    | 2  | 0  | 0  | 2  | 0  |
| IPI00468696.3 | Q6IFX2 | Krt42  | Keratin, type I cytoskeletal 42                                             |   | X | X |   |    |  | 0 | 452  | 24 | 6  | 0  | 1.00 | 1.00 | 13   | 3  | 0  | 12 | 3  | 0  |
| IPI00139301.3 | Q922U2 | Krt5   | Keratin, type II cytoskeletal 5                                             |   | X | X |   |    |  | 1 | 580  | 21 | 16 | 0  | 1.00 | 1.00 | 16   | 11 | 0  | 11 | 11 | 0  |
| IPI00131368.3 | P50446 | Krt6a  | Keratin, type II cytoskeletal 6A                                            |   | X |   |   |    |  | 1 | 553  | 23 | 0  | 0  | 1.00 |      | 12   | 0  | 0  | 11 | 0  | 0  |
| IPI00406377.3 | Q9DCV7 | Krt7   | Keratin, type II cytoskeletal 7                                             |   | X |   |   |    |  | 0 | 457  | 2  | 0  | 0  | 0.99 |      | 1    | 0  | 0  | 1  | 0  | 0  |
| IPI00347110.2 | Q6NXH9 | Krt73  | Keratin, type II cytoskeletal 73                                            |   | X | X |   |    |  | 0 | 539  | 6  | 10 | 0  | 0.99 | 1.00 | 3    | 5  | 0  | 3  | 5  | 0  |
| IPI00221797.1 | Q8BGZ7 | Krt75  | Keratin, type II cytoskeletal 75                                            |   | X |   |   |    |  | 0 | 551  | 16 | 0  | 0  | 0.99 |      | 10   | 0  | 0  | 8  | 0  | 0  |
| IPI00346834.1 | Q3UV17 | Krt76  | Keratin, type II cytoskeletal 2 oral                                        |   | X | X |   |    |  | 0 | 594  | 6  | 10 | 0  | 0.93 | 1.00 | 3    | 4  | 0  | 3  | 4  | 0  |
| IPI00462140.1 | Q6IFZ6 | Krt77  | Keratin, type II cytoskeletal 1b                                            |   | X |   |   |    |  | 2 | 572  | 8  | 0  | 0  | 1.00 |      | 6    | 0  | 0  | 6  | 0  | 0  |
| IPI00124499.2 | Q8VED5 | Krt79  | Keratin, type II cytoskeletal 79                                            |   | X | X |   |    |  | 0 | 531  | 6  | 5  | 0  | 1.00 | 1.00 | 5    | 4  | 0  | 5  | 4  | 0  |
| IPI00322209.5 | P11679 | Krt8   | Keratin, type II cytoskeletal 8                                             |   | X | X | X |    |  | 1 | 490  | 11 | 13 | 41 | 1.00 | 1.00 | 1.00 | 5  | 7  | 18 | 5  | 7  |
| IPI00474575.5 | Q9ERE2 | Krt81  | keratin complex 2, basic, gene 19                                           |   |   | X |   |    |  | 0 | 481  | 0  | 9  | 0  | 0.97 |      | 0    | 4  | 0  | 0  | 4  | 0  |
| IPI00331459.1 | Q9Z2T6 | Krt85  | Keratin, type II cuticular Hb5                                              |   | X |   |   |    |  | 0 | 507  | 2  | 0  | 0  | 0.99 |      | 1    | 0  | 0  | 1  | 0  | 0  |
| IPI00122559.3 | Q61595 | Ktn1   | Kinectin                                                                    |   |   | X |   |    |  | 1 | 1327 | 0  | 10 | 0  |      | 1.00 | 0    | 11 | 0  | 0  | 11 | 0  |



|               |          |              |                                                                 |  |   |   |      |   |      |    |    |    |  |      |      |      |    |    |    |    |    |    |
|---------------|----------|--------------|-----------------------------------------------------------------|--|---|---|------|---|------|----|----|----|--|------|------|------|----|----|----|----|----|----|
| IPI00378700.2 | Q587J6   | L1td1        | LINE-1 type transposase domain-containing protein 1             |  | X | X |      | 0 | 782  | 0  | 24 | 11 |  | 1.00 | 1.00 | 0    | 15 | 9  | 0  | 15 | 9  |    |
| IPI00676957.3 | A2ABW7   | Lama5        | laminin, alpha 5 precursor                                      |  | X |   |      | 3 | 3718 | 0  | 1  | 0  |  | 0.99 |      | 0    | 2  | 0  | 0  | 2  | 0  |    |
| IPI00338785.3 | P02469   | Lamb1-1      | laminin B1 subunit 1                                            |  | X |   |      | 0 | 1834 | 0  | 2  | 0  |  | 1.00 |      | 0    | 2  | 0  | 0  | 2  | 0  |    |
| IPI00400016.1 | P02468   | Lamc1        | Laminin subunit gamma-1                                         |  | X |   |      | 0 | 1607 | 0  | 3  | 0  |  | 1.00 |      | 0    | 3  | 0  | 0  | 3  | 0  |    |
| IPI00331436.4 | Q9CPY7   | Lap3         | Cytosol aminopeptidase                                          |  | X | X | X    | 1 | 519  | 21 | 23 | 21 |  | 1.00 | 1.00 | 1.00 | 6  | 8  | 8  | 6  | 8  | 8  |
| IPI00344088.6 | Q6ZQ58   | Larp1        | la related protein                                              |  | X | X |      | 0 | 1339 | 9  | 3  | 0  |  | 1.00 | 1.00 |      | 10 | 3  | 0  | 9  | 3  | 0  |
| IPI00278107.4 | Q8BVS5   | Larp2        | Putative uncharacterized protein                                |  | X |   |      | 0 | 335  | 10 | 0  | 0  |  | 1.00 |      |      | 2  | 0  | 0  | 2  | 0  | 0  |
| IPI00828620.1 | Q8BWW4   | Larp4        | La-related protein 4                                            |  | X | X |      | 0 | 719  | 9  | 3  | 0  |  | 1.00 | 0.99 |      | 4  | 2  | 0  | 4  | 2  | 0  |
| IPI00620564.3 | Q6A0A2   | Larp5        | Isoform 1 or 2 of La-related protein 4B                         |  | X |   | 2DLC | 0 | 741  | 8  | 0  | 0  |  | 1.00 |      |      | 4  | 0  | 0  | 4  | 0  | 0  |
| IPI00340860.5 | Q05CL8   | Larp7        | La-related protein 7                                            |  | X |   |      | 0 | 570  | 13 | 0  | 0  |  | 1.00 |      |      | 8  | 0  | 0  | 6  | 0  | 0  |
| IPI00453819.2 | Q8BMJ2   | Lars         | Leucyl-tRNA synthetase, cytoplasmic                             |  | X | X | X    | 0 | 1178 | 6  | 8  | 5  |  | 1.00 | 1.00 | 1.00 | 5  | 6  | 4  | 5  | 6  | 4  |
| IPI00462502.3 | A2BE28   | Las1l        | LAS1-like                                                       |  |   |   | X    | 0 | 776  | 0  | 0  | 5  |  |      | 1.00 |      | 0  | 0  | 3  | 0  | 0  | 3  |
| IPI00125091.1 | Q61792   | Lasp1        | LIM and SH3 domain protein 1                                    |  | X |   | X    | 0 | 263  | 16 | 0  | 16 |  | 1.00 | 1.00 |      | 5  | 0  | 4  | 3  | 0  | 4  |
| IPI00331173.8 | Q3U9G9   | Lbr          | Lamin-B receptor                                                |  |   | X |      | 9 | 626  | 0  | 7  | 0  |  | 1.00 |      |      | 0  | 4  | 0  | 0  | 4  | 0  |
| IPI00751369.1 | P06151   | Ldha         | Lactate dehydrogenase A                                         |  | X | X | X    | 1 | 361  | 13 | 72 | 33 |  | 1.00 | 1.00 | 1.00 | 3  | 23 | 10 | 3  | 19 | 10 |
| IPI00229510.5 | P16125   | Ldhb         | L-lactate dehydrogenase B chain                                 |  |   | X | X    | 1 | 334  | 0  | 34 | 36 |  | 1.00 | 1.00 |      | 0  | 9  | 0  | 0  | 9  | 9  |
| IPI00624364.3 | Q3V0V0   | Ldlrad2      | Putative uncharacterized protein                                |  |   | X |      | 1 | 142  | 0  | 0  | 26 |  |      | 1.00 |      | 0  | 0  | 2  | 0  | 0  | 2  |
| IPI00229517.5 | P16045   | Lgals1       | Galectin-1                                                      |  |   | X |      | 0 | 135  | 0  | 0  | 36 |  |      | 1.00 |      | 0  | 0  | 4  | 0  | 0  | 4  |
| IPI00348910.2 | Q61211-2 | Lgtn         | Ligatin                                                         |  |   | X |      | 0 | 587  | 0  | 0  | 9  |  |      | 1.00 |      | 0  | 0  | 2  | 0  | 0  | 2  |
| IPI00263557.4 | P50481-2 | Lhx3         | LIM/homeobox protein Lhx3                                       |  |   | X |      | 0 | 402  | 0  | 0  | 8  |  |      | 0.94 |      | 0  | 0  | 3  | 0  | 0  | 3  |
| IPI00117104.1 | Q99M04   | Lias         | Lipoyl synthase, mitochondrial                                  |  | X |   |      | 0 | 373  | 10 | 0  | 0  |  | 1.00 |      |      | 2  | 0  | 0  | 2  | 0  | 0  |
| IPI00473314.3 | Q3U4X8   | Lig1         | DNA ligase I                                                    |  |   |   | X    | 0 | 932  | 0  | 5  | 0  |  |      | 1.00 |      | 0  | 3  | 0  | 0  | 3  | 0  |
| IPI00170180.5 | Q8K3Y3   | Lin28        | Lin-28 homolog A                                                |  | X |   |      | 1 | 209  | 31 | 0  | 0  |  | 1.00 |      |      | 7  | 0  | 0  | 5  | 0  | 0  |
| IPI00112043.2 | Q9D945   | Llph         | Protein LLP homolog                                             |  | X |   |      | 0 | 130  | 29 | 0  | 0  |  | 1.00 |      |      | 6  | 0  | 0  | 4  | 0  | 0  |
| IPI00620256.3 | P48678   | Lmna         | Lamin-A/C                                                       |  | X |   |      | 0 | 665  | 19 | 0  | 0  |  | 1.00 |      |      | 11 | 0  | 0  | 9  | 0  | 0  |
| IPI00230394.5 | P14733   | Lmnb1        | Lamin-B1                                                        |  | X | X | X    | 0 | 588  | 23 | 42 | 15 |  | 1.00 | 1.00 | 1.00 | 10 | 22 | 8  | 9  | 22 | 8  |
| IPI00126191.5 | P21619   | Lmnb2        | Isoform B2 of Lamin-B2                                          |  | X | X | 1DE  | 0 | 596  | 7  | 12 | 0  |  | 1.00 | 1.00 |      | 3  | 9  | 0  | 3  | 9  | 0  |
| IPI00331707.1 | Q8JZK9   | LOC100040592 | Hydroxymethylglutaryl-CoA synthase, cytoplasmic                 |  |   | X |      | 1 | 520  | 0  | 7  | 0  |  | 1.00 |      |      | 0  | 2  | 0  | 0  | 2  | 0  |
| IPI00831151.2 |          | LOC100043977 | similar to lgh protein                                          |  | X |   |      | 0 | 201  | 16 | 0  | 0  |  | 0.92 |      |      | 2  | 0  | 0  | 2  | 0  | 0  |
| IPI00330862.5 | P26040   | LOC100044177 | Ezrin                                                           |  | X | X | X    | 0 | 586  | 17 | 28 | 12 |  | 1.00 | 1.00 | 1.00 | 9  | 15 | 7  | 8  | 15 | 7  |
| IPI00462072.3 | P17182   | LOC100044223 | Alpha-enolase                                                   |  | X | X | X    | 1 | 434  | 61 | 69 | 55 |  | 1.00 | 1.00 | 1.00 | 29 | 31 | 18 | 22 | 24 | 17 |
| IPI00321923.5 | Q8K1R3   | LOC100044383 | Polyribonucleotide nucleotidyltransferase 1, mitochondrial      |  |   | X |      | 1 | 783  | 0  | 4  | 0  |  | 1.00 |      |      | 0  | 3  | 0  | 0  | 3  | 0  |
| IPI00850753.1 |          | LOC100044395 | similar to RNA binding protein gene with multiple splicing      |  | X |   |      | 0 | 226  | 19 | 0  | 0  |  | 1.00 |      |      | 3  | 0  | 0  | 3  | 0  | 0  |
| IPI00124149.1 | P61971   | LOC100044514 | Nuclear transport factor 2                                      |  |   | X |      | 0 | 127  | 0  | 51 | 0  |  | 1.00 |      |      | 0  | 4  | 0  | 0  | 4  | 0  |
| IPI00119581.2 | P35550   | LOC100044829 | rRNA 2'-O-methyltransferase fibrillarin                         |  | X | X | X    | 0 | 327  | 38 | 26 | 35 |  | 1.00 | 1.00 | 1.00 | 14 | 6  | 10 | 8  | 6  | 10 |
| IPI00317752.2 | Q9D7F7   | LOC100044854 | Charged multivesicular body protein 4c                          |  | X |   |      | 0 | 232  | 27 | 0  | 0  |  | 1.00 |      |      | 3  | 0  | 0  | 3  | 0  | 0  |
| IPI00850433.1 |          | LOC100044980 | similar to Thoc7 protein                                        |  | X |   |      | 0 | 335  | 12 | 0  | 0  |  | 1.00 |      |      | 2  | 0  | 0  | 2  | 0  | 0  |
| IPI00848728.1 |          | LOC100045132 | similar to polyglutamine-containing protein                     |  | X |   |      | 0 | 833  | 13 | 0  | 0  |  | 1.00 |      |      | 5  | 0  | 0  | 5  | 0  | 0  |
| IPI00474487.1 |          | LOC100045157 | hypothetical protein                                            |  | X |   | X    | 0 | 105  | 21 | 0  | 29 |  | 0.99 | 1.00 |      | 6  | 0  | 3  | 4  | 0  | 3  |
| IPI00849786.1 |          | LOC100045189 | similar to transcription factor EF1                             |  | X | X | X    | 0 | 325  | 47 | 18 | 31 |  | 1.00 | 1.00 | 1.00 | 12 | 3  | 6  | 11 | 3  | 6  |
| IPI00853914.1 |          | LOC100045191 | similar to heterogeneous nuclear ribonucleoprotein A2/B1        |  | X | X | X    | 0 | 814  | 19 | 16 | 8  |  | 1.00 | 1.00 | 1.00 | 17 | 13 | 7  | 17 | 12 | 7  |
| IPI00848537.1 |          | LOC100045253 | similar to Scoc protein                                         |  | X |   |      | 0 | 197  | 23 | 0  | 0  |  | 1.00 |      |      | 2  | 0  | 0  | 2  | 0  | 0  |
| IPI00785343.2 | P84244   | LOC100045490 | Histone H3.3                                                    |  |   | X |      | 0 | 136  | 0  | 40 | 0  |  | 1.00 |      |      | 0  | 4  | 0  | 0  | 4  | 0  |
| IPI00848492.1 |          | LOC100045699 | Similar to Electron transferring flavoprotein, beta polypeptide |  |   | X | X    | 0 | 258  | 0  | 7  | 16 |  | 0.96 | 0.94 |      | 0  | 2  | 3  | 0  | 2  | 3  |
| IPI00849741.1 |          | LOC100045848 | similar to BUD31 homolog (S. cerevisiae)                        |  | X |   |      | 0 | 144  | 26 | 0  | 0  |  | 1.00 |      |      | 4  | 0  | 0  | 4  | 0  | 0  |
| IPI00265239.1 |          | LOC100045925 | similar to cytochrome c                                         |  | X |   |      | 0 | 105  | 28 | 0  | 0  |  | 0.99 |      |      | 4  | 0  | 0  | 3  | 0  | 0  |
| IPI00118447.1 | P42669   | LOC100045958 | Transcriptional activator protein Pur-alpha                     |  | X |   |      | 0 | 321  | 18 | 0  | 0  |  | 1.00 |      |      | 3  | 0  | 0  | 3  | 0  | 0  |
| IPI00134621.3 | P62827   | LOC100045999 | GTP-binding nuclear protein Ran                                 |  | X | X | X    | 0 | 216  | 25 | 40 | 45 |  | 1.00 | 1.00 | 1.00 | 4  | 9  | 11 | 4  | 9  | 11 |

|               |          |              |                                                                                                |  |   |   |   |  |  |   |      |    |    |    |      |      |      |    |    |    |    |    |    |
|---------------|----------|--------------|------------------------------------------------------------------------------------------------|--|---|---|---|--|--|---|------|----|----|----|------|------|------|----|----|----|----|----|----|
| IPI00116154.2 | Q9D881   | LOC100046079 | cytochrome c oxidase, subunit Vb                                                               |  | X |   |   |  |  | 0 | 129  | 0  | 16 | 0  | 1.00 | 0    | 3    | 0  | 0  | 2  | 0  |    |    |
| IPI00154004.1 | Q7TQI3   | LOC100046081 | Ubiquitin thioesterase OTUB1                                                                   |  |   | X |   |  |  | 0 | 271  | 0  | 0  | 11 | 1.00 | 0    | 0    | 3  | 0  | 0  | 3  |    |    |
| IPI00850217.1 |          | LOC100046119 | similar to ubiquitin-conjugating enzyme E2<br>UbcH-ben                                         |  | X | X |   |  |  | 2 | 232  | 0  | 30 | 19 | 1.00 | 1.00 | 0    | 4  | 5  | 0  | 4  | 5  |    |
| IPI00850430.1 |          | LOC100046151 | similar to Solute carrier family 25<br>(mitochondrial carrier, phosphate carrier),<br>member 3 |  | X | X |   |  |  | 4 | 357  | 0  | 27 | 25 | 1.00 | 1.00 | 0    | 8  | 7  | 0  | 8  | 7  |    |
| IPI00848890.1 |          | LOC100046167 | similar to Chain B, Crystal Structure Of<br>Sumo-3-Modified Thymine-Dna<br>Glycosylase         |  | X | X |   |  |  | 0 | 199  | 0  | 11 | 11 | 1.00 | 1.00 | 0    | 2  | 2  | 0  | 2  | 2  |    |
| IPI00854971.1 |          | LOC100046302 | similar to Protein disulfide isomerase<br>associated 6                                         |  | X | X | X |  |  | 0 | 391  | 24 | 18 | 25 | 1.00 | 1.00 | 1.00 | 7  | 5  | 6  | 7  | 5  | 6  |
| IPI00131459.1 | P15532   | LOC100046344 | Nucleoside diphosphate kinase A                                                                |  | X | X | X |  |  | 0 | 152  | 34 | 61 | 64 | 1.00 | 1.00 | 1.00 | 7  | 10 | 10 | 3  | 9  | 9  |
| IPI00330303.7 | Q9CWX9   | LOC100046995 | Bifunctional purine biosynthesis protein<br>PURH                                               |  | X | X | X |  |  | 0 | 592  | 6  | 41 | 35 | 1.00 | 1.00 | 1.00 | 3  | 15 | 14 | 3  | 15 | 14 |
| IPI00129466.1 | P83917   | LOC100047028 | Chromobox protein homolog 1                                                                    |  | X | X |   |  |  | 0 | 185  | 24 | 40 | 0  | 1.00 | 1.00 |      | 8  | 5  | 0  | 5  | 5  | 0  |
| IPI00750945.2 |          | LOC100047199 | Outer dense fiber protein 2                                                                    |  | X |   |   |  |  | 0 | 869  | 9  | 0  | 0  | 1.00 |      |      | 5  | 0  | 0  | 5  | 0  | 0  |
| IPI00115831.1 | O55128   | LOC100047209 | Histone deacetylase complex subunit<br>SAP18                                                   |  | X |   |   |  |  | 0 | 153  | 27 | 0  | 0  | 0.99 |      |      | 3  | 0  | 0  | 3  | 0  | 0  |
| IPI00849478.1 |          | LOC100047252 | Phosphoserine aminotransferase 1                                                               |  |   | X | X |  |  | 0 | 370  | 0  | 36 | 21 | 1.00 | 1.00 | 0    | 11 | 6  | 0  | 11 | 6  |    |
| IPI00849074.1 |          | LOC100047305 | similar to 40S ribosomal protein S28                                                           |  |   | X |   |  |  | 0 | 69   | 0  | 57 | 0  | 1.00 |      |      | 0  | 5  | 0  | 0  | 4  | 0  |
| IPI00755226.2 |          | LOC100047311 | similar to protein translocation complex<br>beta subunit                                       |  |   | X |   |  |  | 1 | 102  | 0  | 21 | 0  | 1.00 |      |      | 0  | 2  | 0  | 0  | 2  | 0  |
| IPI00462008.5 |          | LOC100047352 | similar to Glyceraldehyde-3-phosphate<br>dehydrogenase                                         |  | X |   |   |  |  | 0 | 332  | 43 | 0  | 0  | 1.00 |      |      | 11 | 0  | 0  | 9  | 0  | 0  |
| IPI00118986.1 | Q9DB20   | LOC100047429 | ATP synthase subunit O, mitochondrial                                                          |  |   | X | X |  |  | 0 | 213  | 0  | 41 | 29 | 1.00 | 1.00 | 0    | 7  | 5  | 0  | 6  | 4  |    |
| IPI00850111.1 |          | LOC100047539 | similar to SEC15 homolog                                                                       |  | X |   |   |  |  | 1 | 663  | 6  | 0  | 0  | 0.92 |      |      | 2  | 0  | 0  | 2  | 0  | 0  |
| IPI00125861.2 | Q811D0-3 | LOC100047603 | Disks large homolog 1                                                                          |  | X |   |   |  |  | 1 | 927  | 4  | 0  | 0  | 1.00 |      |      | 2  | 0  | 0  | 2  | 0  | 0  |
| IPI00187443.1 | P59325   | LOC100047658 | Eukaryotic translation initiation factor 5                                                     |  | X |   | X |  |  | 0 | 429  | 8  | 0  | 8  | 1.00 | 1.00 | 3    | 0  | 2  | 3  | 0  | 2  |    |
| IPI00849728.1 |          | LOC100047762 | similar to Aspartate aminotransferase,<br>cytoplasmic                                          |  | X | X | X |  |  | 0 | 396  | 19 | 20 | 29 | 1.00 | 1.00 | 1.00 | 4  | 6  | 7  | 4  | 6  | 7  |
| IPI00133229.1 | Q9D0W5   | LOC100047806 | Peptidyl-prolyl cis-trans isomerase-like 1                                                     |  | X |   |   |  |  | 0 | 166  | 14 | 0  | 0  | 1.00 |      |      | 2  | 0  | 0  | 2  | 0  | 0  |
| IPI00110172.1 | P16951   | LOC100047997 | Cyclic AMP-dependent transcription factor<br>ATF-2                                             |  | X |   |   |  |  | 0 | 487  | 13 | 0  | 0  | 1.00 |      |      | 3  | 0  | 0  | 3  | 0  | 0  |
| IPI00114862.1 | Q99J36   | LOC100048066 | THUMP domain-containing protein 1                                                              |  | X |   |   |  |  | 0 | 350  | 13 | 0  | 0  | 1.00 |      |      | 3  | 0  | 0  | 3  | 0  | 0  |
| IPI00127989.1 | Q9R0Q7   | LOC100048119 | Prostaglandin E synthase 3                                                                     |  |   | X | X |  |  | 0 | 160  | 0  | 42 | 37 | 1.00 | 1.00 | 0    | 6  | 5  | 0  | 6  | 5  |    |
| IPI00125901.5 | P62301   | LOC100048340 | 40S ribosomal protein S13                                                                      |  | X | X | X |  |  | 0 | 151  | 31 | 36 | 31 | 1.00 | 1.00 | 1.00 | 6  | 6  | 5  | 6  | 6  | 5  |
| IPI00129685.2 |          | LOC100048430 | Translationally-controlled tumor protein                                                       |  | X | X | X |  |  | 0 | 179  | 31 | 21 | 28 | 1.00 | 1.00 | 1.00 | 3  | 3  | 4  | 3  | 3  | 4  |
| IPI00874964.3 |          | LOC100048438 | 36 kDa protein                                                                                 |  | X |   |   |  |  | 0 | 337  | 49 | 0  | 0  | 1.00 |      |      | 14 | 0  | 0  | 11 | 0  | 0  |
| IPI00849113.1 |          | LOC100048445 | similar to fau                                                                                 |  | X |   | X |  |  | 0 | 133  | 29 | 0  | 8  | 1.00 | 1.00 | 4    | 0  | 2  | 4  | 0  | 2  |    |
| IPI00112004.1 | Q9D937   | LOC100048454 | MCG17849                                                                                       |  | X |   |   |  |  | 0 | 123  | 37 | 0  | 0  | 1.00 |      |      | 5  | 0  | 0  | 4  | 0  | 0  |
| IPI00420807.3 | Q6PDM2   | LOC100048559 | Splicing factor, arginine/serine-rich 1                                                        |  | X | X | X |  |  | 0 | 248  | 20 | 10 | 15 | 1.00 | 1.00 | 1.00 | 4  | 2  | 3  | 4  | 2  | 3  |
| IPI00850817.1 |          | LOC100048613 | hypothetical protein                                                                           |  |   | X |   |  |  | 0 | 70   | 0  | 26 | 0  | 1.00 |      |      | 0  | 2  | 0  | 0  | 2  | 0  |
| IPI00273232.6 | Q7TNE3   | LOC100048812 | Sperm-associated antigen 7                                                                     |  | X |   |   |  |  | 0 | 227  | 17 | 0  | 0  | 0.97 |      |      | 2  | 0  | 0  | 2  | 0  | 0  |
| IPI00653423.2 |          | LOC100048832 | Branched-chain-amino-acid<br>aminotransferase                                                  |  |   |   | X |  |  | 2 | 519  | 0  | 0  | 9  |      | 1.00 | 0    | 0  | 3  | 0  | 0  | 3  |    |
| IPI00673707.2 |          | LOC633677    | PREDICTED: similar to Bifunctional<br>aminoacyl-tRNA synthetase                                |  | X | X | X |  |  | 0 | 1470 | 3  | 6  | 17 | 1.00 | 1.00 | 1.00 | 3  | 5  | 16 | 3  | 5  | 16 |
| IPI00673290.1 |          | LOC634088    | similar to Glyceraldehyde-3-phosphate<br>dehydrogenase                                         |  | X |   |   |  |  | 0 | 165  | 18 | 0  | 0  | 0.97 |      |      | 2  | 0  | 0  | 2  | 0  | 0  |
| IPI00468437.2 | Q9CR47   | LOC636306    | Ribosome biogenesis protein NSA2<br>homolog                                                    |  | X |   | X |  |  | 0 | 260  | 22 | 0  | 15 | 1.00 | 1.00 | 4    | 0  | 3  | 4  | 0  | 3  |    |
| IPI00662657.3 |          | LOC640502    | similar to UDP-N-acetylglucosamine<br>pyrophosphorylase 1                                      |  | X |   |   |  |  | 0 | 587  | 12 | 0  | 0  | 0.99 |      |      | 3  | 0  | 0  | 3  | 0  | 0  |

|               |          |           |                                                                         |   |   |      |     |      |    |    |      |      |      |      |    |    |   |    |    |   |
|---------------|----------|-----------|-------------------------------------------------------------------------|---|---|------|-----|------|----|----|------|------|------|------|----|----|---|----|----|---|
| IPI00661702.2 |          | LOC641175 | similar to Cdv3 protein                                                 | X |   | 0    | 423 | 9    | 0  | 0  | 1.00 |      | 2    | 0    | 0  | 2  | 0 | 0  |    |   |
| IPI00828573.1 | Q61784   | LOC668715 | L1Md-A13 repetitive sequence                                            | X |   | 0    | 357 | 18   | 0  | 0  | 1.00 |      | 6    | 0    | 0  | 5  | 0 | 0  |    |   |
| IPI00623776.3 |          | LOC674678 | similar to histone H4                                                   | X | X | X    | 0   | 158  | 37 | 40 | 33   | 1.00 | 1.00 | 1.00 | 12 | 18 | 7 | 10 | 15 | 6 |
| IPI00753915.2 |          | LOC674706 | similar to Zinc finger protein 341                                      | X |   | X    | 0   | 1076 | 4  | 0  | 3    | 1.00 |      | 1.00 | 2  | 0  | 2 | 2  | 0  | 2 |
| IPI00138302.1 |          | LOC674727 | similar to ribosomal protein L38                                        | X | X |      | 0   | 70   | 50 | 53 | 0    | 1.00 | 1.00 |      | 6  | 7  | 0 | 6  | 7  | 0 |
| IPI00890128.1 |          | LOC676144 | 16 kDa protein                                                          | X | X |      | 0   | 142  | 14 | 27 | 0    | 0.00 | 1.00 |      | 2  | 2  | 0 | 2  | 2  | 0 |
| IPI00113394.5 |          | LOC676847 | similar to Rps15a protein                                               | X | X | X    | 0   | 188  | 23 | 22 | 26   | 1.00 | 1.00 | 1.00 | 5  | 3  | 4 | 3  | 3  | 4 |
| IPI00227451.1 | Q8BZA9   | LOC677429 | Probable fructose-2,6-bisphosphatase<br>TIGAR                           | X |   |      | 1   | 269  | 13 | 0  | 0    | 1.00 |      |      | 2  | 0  | 0 | 2  | 0  | 0 |
| IPI00319518.4 | Q3V2D0   | Lonp1     | Lon protease homolog                                                    |   | X | X    | 2   | 953  | 0  | 23 | 9    |      | 1.00 | 1.00 | 0  | 11 | 4 | 0  | 10 | 4 |
| IPI00221494.7 | Q8BFW7   | Lpp       | Isoform 1 or 5 of Lipoma-preferred partner<br>homolog                   | X |   | 2DLC | 0   | 613  | 7  | 0  | 0    | 0.97 |      |      | 2  | 0  | 0 | 2  | 0  | 0 |
| IPI00279273.2 | Q8K099   | Lrit1     | leucine-rich repeat, immunoglobulin-like<br>and transmembrane domains 1 |   |   | X    | 1   | 624  | 0  | 0  | 5    |      |      | 0.94 | 0  | 0  | 2 | 0  | 0  | 2 |
| IPI00119787.4 | A2API5   | Lrp1b     | Low density lipoprotein-related protein 1B                              |   |   | X    | 3   | 4630 | 0  | 0  | 2    |      |      | 0.98 | 0  | 0  | 8 | 0  | 0  | 8 |
| IPI00349520.5 | A2ARV4   | Lrp2      | Low-density lipoprotein receptor-related<br>protein 2                   |   |   | X    | 2   | 4660 | 0  | 1  | 0    |      | 1.00 |      | 0  | 3  | 0 | 0  | 3  | 0 |
| IPI00469307.2 | P55302   | Lrpap1    | Alpha-2-macroglobulin receptor-associated<br>protein                    | X |   |      | 0   | 360  | 19 | 0  | 0    | 1.00 |      |      | 6  | 0  | 0 | 5  | 0  | 0 |
| IPI00420706.4 | Q6PB66   | Lrpprc    | Leucine-rich PPR motif-containing protein,<br>mitochondrial             |   | X | X    | 1   | 1392 | 0  | 28 | 3    |      | 1.00 | 1.00 | 0  | 28 | 4 | 0  | 27 | 4 |
| IPI00474873.3 | Q6EDY6   | Lrrc16a   | Leucine-rich repeat-containing protein 16A                              | X |   |      | 0   | 1374 | 4  | 0  | 0    | 1.00 |      |      | 3  | 0  | 0 | 3  | 0  | 0 |
| IPI00138089.4 | Q505F5   | Lrrc47    | Leucine-rich repeat-containing protein 47                               | X | X | X    | 0   | 581  | 6  | 8  | 16   | 1.00 | 1.00 | 1.00 | 2  | 2  | 5 | 2  | 2  | 5 |
| IPI00123281.1 | Q922Q8   | Lrrc59    | Leucine-rich repeat-containing protein 59                               |   | X | X    | 1   | 307  | 0  | 17 | 25   |      | 1.00 | 1.00 | 0  | 4  | 5 | 0  | 4  | 5 |
| IPI00654388.2 | Q3UZ39   | Lrrfp1    | Isoform 1 of Leucine-rich repeat flightless-<br>interacting protein 1   | X |   | 2DLC | 0   | 729  | 9  | 0  | 0    | 1.00 |      |      | 3  | 0  | 0 | 3  | 0  | 0 |
| IPI00659860.2 | Q91WK0   | Lrrfp2    | Leucine-rich repeat flightless-interacting<br>protein 2                 | X |   |      | 0   | 722  | 5  | 0  | 0    | 1.00 |      |      | 2  | 0  | 0 | 2  | 0  | 0 |
| IPI00225459.1 | Q8BUI3   | Lrwd1     | Leucine-rich repeat and WD repeat-<br>containing protein 1              |   |   | X    | 0   | 648  | 0  | 0  | 10   |      |      | 0.98 | 0  | 0  | 3 | 0  | 0  | 3 |
| IPI00330362.5 | Q3UM18   | Lsg1      | Isoform 1 of Large subunit GTPase 1<br>homolog                          |   | X | 1DE  | 0   | 644  | 0  | 3  | 0    |      | 0.96 |      | 0  | 2  | 0 | 0  | 2  | 0 |
| IPI00121579.1 | Q8VC85   | Lsm1      | U6 snRNA-associated Sm-like protein<br>LSm1                             | X |   |      | 0   | 133  | 26 | 0  | 0    | 1.00 |      |      | 2  | 0  | 0 | 2  | 0  | 0 |
| IPI00172202.1 | Q8K2F8   | Lsm14a    | Protein LSM14 homolog A                                                 | X |   |      | 0   | 462  | 9  | 0  | 0    | 1.00 |      |      | 3  | 0  | 0 | 3  | 0  | 0 |
| IPI00229470.2 | Q8CGC4   | Lsm14b    | Protein LSM14 homolog B                                                 | X |   |      | 0   | 385  | 8  | 0  | 0    | 0.99 |      |      | 2  | 0  | 0 | 2  | 0  | 0 |
| IPI00136054.1 | O35901   | Lsm2      | snRNP core protein SMX5                                                 |   | X |      | 0   | 131  | 0  | 23 | 0    |      | 1.00 |      | 0  | 2  | 0 | 0  | 2  | 0 |
| IPI00129873.1 | P62313   | Lsm6      | U6 snRNA-associated Sm-like protein<br>LSm6                             |   | X |      | 0   | 80   | 0  | 33 | 0    |      | 1.00 |      | 0  | 3  | 0 | 0  | 3  | 0 |
| IPI00410804.1 | Q9CYI4   | Luc7I     | Isoform 1 of Putative RNA-binding protein<br>Luc7-like 1                | X |   | 2DLC | 0   | 371  | 20 | 0  | 0    | 1.00 |      |      | 5  | 0  | 0 | 5  | 0  | 0 |
| IPI00380309.3 | Q7TNC4   | Luc7I2    | Putative RNA-binding protein Luc7-like 2                                | X |   |      | 0   | 392  | 16 | 0  | 0    | 1.00 |      |      | 6  | 0  | 0 | 5  | 0  | 0 |
| IPI00122418.1 | Q5SUF2-2 | Luc7I3    | Cisplatin resistance-associated<br>overexpressed protein                | X |   | X    | 0   | 491  | 12 | 0  | 5    | 1.00 |      | 1.00 | 4  | 0  | 2 | 4  | 0  | 2 |
| IPI00322204.4 | Q8R4U7   | Luzp1     | Leucine zipper protein 1                                                | X |   |      | 0   | 1068 | 12 | 0  | 0    | 1.00 |      |      | 9  | 0  | 0 | 8  | 0  | 0 |
| IPI00113232.3 | Q08288   | Lyar      | Cell growth-regulating nucleolar protein                                | X | X | X    | 0   | 388  | 24 | 8  | 6    | 1.00 | 1.00 | 1.00 | 6  | 3  | 2 | 6  | 3  | 2 |
| IPI00130018.1 | P97823   | Lypla1    | Acyl-protein thioesterase 1                                             |   |   | X    | 1   | 230  | 0  | 0  | 22   |      |      | 1.00 | 0  | 0  | 3 | 0  | 0  | 3 |
| IPI00173156.1 | Q8K3C3   | Lzic      | Protein LZIC                                                            | X |   |      | 0   | 190  | 14 | 0  | 0    | 1.00 |      |      | 3  | 0  | 0 | 3  | 0  | 0 |
| IPI00848566.1 | Q9QXZ0   | Macf1     | microtubule-actin crosslinking factor 1                                 |   | X | X    | 1   | 5430 | 0  | 5  | 1    |      | 1.00 | 1.00 | 0  | 18 | 4 | 0  | 18 | 4 |
| IPI00132692.1 | Q9CQL1   | Mago1b    | Protein mago nashi homolog 1-related                                    |   | X |      | 0   | 146  | 0  | 25 | 0    |      | 1.00 |      | 0  | 3  | 0 | 0  | 3  | 0 |

|                |          |             |                                                                 |   |   |   |   |   |    |      |    |    |    |      |      |      |    |    |    |    |    |    |
|----------------|----------|-------------|-----------------------------------------------------------------|---|---|---|---|---|----|------|----|----|----|------|------|------|----|----|----|----|----|----|
| IPI00606905.1  | Q571K4   | Map3k7ip3   | Mitogen-activated protein kinase kinase 7-interacting protein 3 | X |   |   |   |   | 0  | 716  | 10 | 0  | 0  | 1.00 |      | 4    | 0  | 0  | 4  | 0  | 0  |    |
| IPI00130014.3  | P97820   | Map4k4      | mitogen-activated protein kinase kinase kinase 4                |   |   |   | X |   | 1  | 1234 | 0  | 0  | 2  | 0.94 | 0    | 0    | 2  | 0  | 0  | 2  |    |    |
| IPI00119663.3  | P63085   | Mapk1       | Mitogen-activated protein kinase 1                              |   |   |   | X |   | 0  | 358  | 0  | 0  | 13 | 1.00 | 0    | 0    | 3  | 0  | 0  | 3  |    |    |
| IPI00117896.3  | Q61166   | Mapre1      | Microtubule-associated protein RP/EB family member 1            | X |   |   | X |   | 0  | 268  | 15 | 0  | 14 | 1.00 | 1.00 | 4    | 0  | 2  | 3  | 0  | 2  |    |
| IPI00229534.5  | P26645   | Marcks      | Myristoylated alanine-rich C-kinase substrate                   | X | X | X |   |   | 0  | 309  | 24 | 12 | 9  | 1.00 | 1.00 | 1.00 | 3  | 2  | 2  | 3  | 2  | 2  |
| IPI00281011.7  | P28667   | Marcks1     | MARCKS-related protein                                          | X |   |   | X |   | 0  | 200  | 37 | 0  | 14 | 1.00 | 1.00 | 3    | 0  | 2  | 3  | 0  | 2  |    |
| IPI00461469.3  | Q68FL6   | Mars        | Methionyl-tRNA synthetase, cytoplasmic                          |   |   |   | X | X | 3  | 902  | 0  | 7  | 14 | 1.00 | 1.00 | 0    | 4  | 8  | 0  | 4  | 8  |    |
| IPI00454016.5  | Q3THS6   | Mat2a       | S-adenosylmethionine synthetase                                 | X | X | X |   |   | 0  | 395  | 21 | 26 | 30 | 1.00 | 1.00 | 1.00 | 7  | 7  | 9  | 6  | 7  | 9  |
| IPI00468802.5  | Q99LB6   | Mat2b       | Methionine adenosyltransferase 2 subunit beta                   | X |   |   | X |   | 1  | 334  | 18 | 0  | 0  | 1.00 |      | 3    | 0  | 0  | 3  | 0  | 0  |    |
| IPI00453826.2  | Q8K310   | Matr3       | Matrin-3                                                        | X | X | X |   |   | 0  | 846  | 14 | 12 | 20 | 1.00 | 1.00 | 1.00 | 7  | 6  | 10 | 7  | 6  | 10 |
| IPI00131067.1  | Q9Z2D8   | Mbd3        | Methyl-CpG-binding domain protein 3                             | X | X | X |   |   | 0  | 285  | 10 | 22 | 17 | 1.00 | 1.00 | 1.00 | 2  | 3  | 2  | 2  | 3  | 2  |
| IPI00124157.3  | Q9WTZ2   | Mbtps1      | Membrane-bound transcription factor site-1 protease             |   |   |   | X |   | 2  | 1052 | 0  | 0  | 3  |      | 1.00 | 0    | 0  | 3  | 0  | 0  | 3  |    |
| IPI00170316.1  | Q8K5B2   | Mcf2        | Multiple coagulation factor deficiency protein 2 homolog        | X |   |   |   |   | 0  | 145  | 12 | 0  | 0  | 1.00 |      | 2    | 0  | 0  | 2  | 0  | 0  |    |
| IPI00115902.2  | O55142   | mCG_1036414 | 60S ribosomal protein L35a                                      | X |   |   | X |   | 0  | 110  | 32 | 0  | 18 | 0.98 | 1.00 | 4    | 0  | 3  | 4  | 0  | 3  |    |
| IPI00222546.5  | P67984   | mCG_130059  | 60S ribosomal protein L22                                       | X | X | X |   |   | 0  | 128  | 23 | 51 | 39 | 0.98 | 1.00 | 1.00 | 2  | 4  | 3  | 2  | 4  | 3  |
| IPI00323820.4  | Q3UJN1   | Mcm2        | Putative uncharacterized protein                                | X | X | X |   |   | 1  | 913  | 15 | 15 | 8  | 1.00 | 1.00 | 1.00 | 13 | 12 | 7  | 11 | 12 | 7  |
| IPI00108338.1  | P25206   | Mcm3        | DNA replication licensing factor MCM3                           | X | X | X |   |   | 0  | 812  | 15 | 22 | 13 | 1.00 | 1.00 | 1.00 | 8  | 14 | 8  | 8  | 14 | 8  |
| IPI00117016.1  | P49717   | Mcm4        | DNA replication licensing factor MCM4                           | X | X | X |   |   | 0  | 862  | 15 | 16 | 9  | 1.00 | 1.00 | 1.00 | 8  | 10 | 6  | 7  | 10 | 6  |
| IPI00309398.6  | Q52KC3   | Mcm5        | minichromosome maintenance deficient 5, cell division cycle 46  | X | X | X |   |   | 1  | 734  | 23 | 23 | 21 | 1.00 | 1.00 | 1.00 | 14 | 15 | 13 | 13 | 14 | 13 |
| IPI00123881.1  | P97311   | Mcm6        | DNA replication licensing factor MCM6                           | X | X | X |   |   | 0  | 821  | 5  | 23 | 10 | 1.00 | 1.00 | 1.00 | 3  | 14 | 6  | 3  | 14 | 6  |
| IPI00126396.2  | Q3V122   | Mcm7        | Putative uncharacterized protein                                | X | X | X |   |   | 0  | 720  | 10 | 35 | 17 | 1.00 | 1.00 | 1.00 | 4  | 18 | 9  | 4  | 17 | 9  |
| IPI00753701.3  | Q5PSV9   | Mdc1        | mediator of DNA damage checkpoint 1                             |   |   |   | X |   | 0  | 1708 | 0  | 0  | 4  |      | 1.00 | 0    | 0  | 4  | 0  | 0  | 4  |    |
| IPI00336324.11 | P14152   | Mdh1        | Malate dehydrogenase, cytoplasmic                               |   |   |   | X | X | 1  | 334  | 0  | 28 | 22 |      | 1.00 | 1.00 | 0  | 8  | 5  | 0  | 8  | 5  |
| IPI00323592.2  | P08249   | Mdh2        | Malate dehydrogenase, mitochondrial                             |   |   |   | X | X | 1  | 338  | 0  | 42 | 44 |      | 1.00 | 1.00 | 0  | 11 | 11 | 0  | 11 | 11 |
| IPI00458039.3  | A2ANY6   | Mdn1        | Midasin homolog                                                 |   |   |   | X |   | 12 | 5589 | 0  | 9  | 0  |      | 1.00 | 0    | 37 | 0  | 0  | 37 | 0  |    |
| IPI00115977.1  | Q99KE1   | Me2         | NAD-dependent malic enzyme, mitochondrial                       |   |   |   | X |   | 3  | 589  | 0  | 6  | 0  |      | 0.98 | 0    | 2  | 0  | 0  | 2  | 0  |    |
| IPI00110388.2  | Q2VPQ9-2 | Meaf6       | Chromatin modification-related protein MEAF6                    | X |   |   |   |   | 0  | 192  | 19 | 0  | 0  | 1.00 |      | 4    | 0  | 0  | 4  | 0  | 0  |    |
| IPI00224399.1  | Q8C1S0   | Med19       | Mediator of RNA polymerase II transcription subunit 19          | X |   |   |   |   | 0  | 244  | 20 | 0  | 0  | 1.00 |      | 4    | 0  | 0  | 2  | 0  | 0  |    |
| IPI00405351.1  | Q8C611   | Mesdc2      | unnamed protein product                                         | X |   |   |   |   | 0  | 237  | 28 | 0  | 0  | 1.00 |      | 4    | 0  | 0  | 4  | 0  | 0  |    |
| IPI00272622.1  | Q8BP48   | Metap1      | Methionine aminopeptidase 1                                     |   |   |   | X |   | 0  | 386  | 0  | 0  | 5  |      | 0.99 | 0    | 0  | 2  | 0  | 0  | 2  |    |
| IPI00272238.5  | Q3UI33   | Metap2      | Methionine aminopeptidase                                       | X |   |   |   |   | 0  | 488  | 11 | 0  | 0  | 1.00 |      | 3    | 0  | 0  | 3  | 0  | 0  |    |
| IPI00228590.2  | Q9CQU1   | Mfap1b      | Microfibrillar-associated protein 1                             | X |   |   |   |   | 0  | 439  | 9  | 0  | 0  | 1.00 |      | 2    | 0  | 0  | 2  | 0  | 0  |    |
| IPI00124959.1  | Q61769   | Mki67       | Ki-67 protein                                                   | X |   |   | X |   | 0  | 2938 | 2  | 0  | 2  | 0.90 | 0.99 | 3    | 0  | 5  | 3  | 0  | 4  |    |
| IPI00225912.8  | Q91VE6   | Mki67ip     | MKI67 FHA domain-interacting nucleolar phosphoprotein           | X |   |   | X |   | 0  | 317  | 30 | 0  | 10 | 1.00 | 1.00 | 9    | 0  | 4  | 8  | 0  | 4  |    |
| IPI00885322.1  | Q9QZQ1   | Mlit4       | Afadin                                                          | X |   |   |   |   | 2  | 1827 | 6  | 0  | 0  | 1.00 |      | 7    | 0  | 0  | 7  | 0  | 0  |    |
| IPI00314370.3  | P51949   | Mnat1       | CDK-activating kinase assembly factor MAT1                      | X |   |   |   |   | 0  | 309  | 17 | 0  | 0  | 1.00 |      | 4    | 0  | 0  | 4  | 0  | 0  |    |
| IPI00132323.6  | Q8K396   | Mnd1        | Meiotic nuclear division protein 1 homolog                      | X |   |   |   |   | 0  | 205  | 11 | 0  | 0  | 0.99 |      | 2    | 0  | 0  | 2  | 0  | 0  |    |
| IPI00830528.1  | Q3UD86   | Mov10       | Putative uncharacterized protein                                | X | X | X |   |   | 2  | 1004 | 13 | 8  | 9  | 1.00 | 1.00 | 1.00 | 7  | 6  | 6  | 7  | 6  | 6  |

|               |        |           |                                                            |  |   |      |   |      |    |    |    |      |      |    |    |    |    |    |    |
|---------------|--------|-----------|------------------------------------------------------------|--|---|------|---|------|----|----|----|------|------|----|----|----|----|----|----|
| IPI00402911.1 | Q810V0 | Mphosph10 | U3 small nucleolar ribonucleoprotein protein MPP10         |  | X |      | 0 | 681  | 0  | 0  | 6  |      | 1.00 | 0  | 0  | 3  | 0  | 0  | 3  |
| IPI00761693.5 | Q8BVD5 | Mpp7      | Isoform 1 of MAGUK p55 subfamily member 7                  |  | X | 2DLC | 0 | 576  | 10 | 0  | 0  | 1.00 |      | 3  | 0  | 0  | 3  | 0  | 0  |
| IPI00406030.2 | Q5SWZ5 | Mpprip    | Myosin phosphatase Rho interacting protein                 |  | X |      | 0 | 2269 | 1  | 0  | 0  | 0.99 |      | 1  | 0  | 0  | 1  | 0  | 0  |
| IPI00132703.1 | Q9CQL7 | Mrfap1    | MORF4 family-associated protein 1                          |  | X |      | 0 | 125  | 36 | 0  | 0  | 1.00 |      | 6  | 0  | 0  | 3  | 0  | 0  |
| IPI00885509.1 | Q9CQT1 | Mri1      | Methylthioribose-1-phosphate isomerase                     |  | X |      | 1 | 369  | 0  | 0  | 12 |      | 1.00 | 0  | 0  | 3  | 0  | 0  | 3  |
| IPI00118237.2 | Q99N96 | Mrpl1     | 39S ribosomal protein L1, mitochondrial                    |  | X |      | 0 | 336  | 15 | 0  | 0  | 1.00 |      | 3  | 0  | 0  | 3  | 0  | 0  |
| IPI00132412.3 | Q3TBW2 | Mrpl10    | 39S ribosomal protein L10, mitochondrial                   |  | X |      | 0 | 262  | 0  | 0  | 20 |      | 1.00 | 0  | 0  | 3  | 0  | 0  | 3  |
| IPI00118963.1 | Q9DB15 | Mrpl12    | 39S ribosomal protein L12, mitochondrial                   |  | X |      | 0 | 201  | 0  | 0  | 18 |      | 1.00 | 0  | 0  | 3  | 0  | 0  | 3  |
| IPI00134011.1 | Q9D1P0 | Mrpl13    | 39S ribosomal protein L13, mitochondrial                   |  | X |      | 0 | 178  | 0  | 0  | 15 |      | 1.00 | 0  | 0  | 3  | 0  | 0  | 3  |
| IPI00118226.1 | Q99N91 | Mrpl34    | 39S ribosomal protein L34, mitochondrial                   |  | X |      | 0 | 92   | 0  | 24 | 0  | 0.99 |      | 0  | 2  | 0  | 0  | 2  | 0  |
| IPI00323669.3 | Q9Z2Q5 | Mrpl40    | 39S ribosomal protein L40, mitochondrial                   |  | X |      | 0 | 206  | 20 | 0  | 0  | 1.00 |      | 2  | 0  | 0  | 2  | 0  | 0  |
| IPI00153603.1 | Q8R2L5 | Mrps18c   | 28S ribosomal protein S18c, mitochondrial                  |  | X | X    | 0 | 143  | 0  | 0  | 10 |      | 0.97 | 0  | 0  | 2  | 0  | 0  | 2  |
| IPI00754363.1 | Q99LZ4 | Mrps23    | Mrps23 protein (Fragment)                                  |  | X |      | 0 | 210  | 15 | 0  | 0  | 1.00 |      | 2  | 0  | 0  | 2  | 0  | 0  |
| IPI00108194.1 | Q80ZS3 | Mrps26    | 28S ribosomal protein S26, mitochondrial                   |  | X |      | 0 | 200  | 0  | 10 | 0  | 1.00 |      | 0  | 2  | 0  | 0  | 2  | 0  |
| IPI00110672.3 | Q9CY16 | Mrps28    | 28S ribosomal protein S28, mitochondrial                   |  | X |      | 0 | 186  | 22 | 0  | 0  | 1.00 |      | 2  | 0  | 0  | 2  | 0  | 0  |
| IPI00124828.1 | Q61733 | Mrps31    | 28S ribosomal protein S31, mitochondrial                   |  | X |      | 0 | 384  | 16 | 0  | 0  | 1.00 |      | 4  | 0  | 0  | 4  | 0  | 0  |
| IPI00222538.2 | Q8BJZ4 | Mrps35    | 28S ribosomal protein S35, mitochondrial                   |  | X |      | 0 | 320  | 9  | 0  | 0  | 1.00 |      | 2  | 0  | 0  | 2  | 0  | 0  |
| IPI00118196.1 | Q99N87 | Mrps5     | 28S ribosomal protein S5, mitochondrial                    |  | X |      | 1 | 432  | 7  | 0  | 0  | 1.00 |      | 2  | 0  | 0  | 2  | 0  | 0  |
| IPI00118158.1 | P43247 | Msh2      | DNA mismatch repair protein Msh2                           |  | X | X    | 4 | 935  | 0  | 25 | 11 | 1.00 | 1.00 | 0  | 17 | 6  | 0  | 17 | 6  |
| IPI00310173.2 | Q6GTK8 | Msh6      | mutS homolog 6                                             |  | X | X    | 4 | 1358 | 0  | 25 | 11 | 1.00 | 1.00 | 0  | 25 | 12 | 0  | 25 | 12 |
| IPI00120924.1 | Q920Q6 | Msi2      | RNA-binding protein Musashi homolog 2                      |  | X |      | 2 | 346  | 9  | 0  | 0  | 1.00 |      | 2  | 0  | 0  | 2  | 0  | 0  |
| IPI00110588.4 | P26041 | Msn       | Moesin                                                     |  | X | X    | 0 | 577  | 15 | 14 | 11 | 1.00 | 1.00 | 7  | 8  | 6  | 6  | 8  | 6  |
| IPI00853911.1 | Q8K4B0 | Mta1      | Metastasis-associated protein MTA1                         |  | X |      | 0 | 715  | 15 | 0  | 0  | 1.00 |      | 7  | 0  | 0  | 7  | 0  | 0  |
| IPI00128230.1 | Q9R190 | Mta2      | Metastasis-associated protein MTA2                         |  | X |      | 0 | 668  | 6  | 0  | 0  | 0.99 |      | 3  | 0  | 0  | 3  | 0  | 0  |
| IPI00125745.1 | Q924K8 | Mta3      | Metastasis-associated protein MTA3                         |  | X |      | 0 | 591  | 11 | 0  | 0  | 1.00 |      | 5  | 0  | 0  | 5  | 0  | 0  |
| IPI00132096.3 | Q9CQ65 | Mtap      | S-methyl-5'-thioadenosine phosphorylase                    |  | X | X    | 0 | 283  | 12 | 0  | 13 | 1.00 | 1.00 | 3  | 0  | 2  | 2  | 0  | 2  |
| IPI00118075.1 | P20357 | Mtap2     | Microtubule-associated protein 2                           |  | X |      | 0 | 1828 | 3  | 0  | 0  | 1.00 |      | 3  | 0  | 0  | 3  | 0  | 0  |
| IPI00848818.1 | Q05BJ2 | Mtap4     | microtubule-associated protein 4                           |  | X |      | 0 | 1125 | 19 | 0  | 0  | 1.00 |      | 16 | 0  | 0  | 12 | 0  | 0  |
| IPI00282957.4 | A2AJI0 | Mtap7d1   | MAP7 domain-containing protein 1                           |  | X |      | 0 | 846  | 4  | 0  | 0  | 1.00 |      | 2  | 0  | 0  | 2  | 0  | 0  |
| IPI00750596.1 | Q9D050 | Mtch2     | Putative uncharacterized protein                           |  | X | X    | 2 | 312  | 0  | 14 | 9  | 1.00 | 1.00 | 0  | 3  | 2  | 0  | 3  | 2  |
| IPI00330599.1 | Q80WJ7 | Mtdh      | Protein LYRIC                                              |  | X |      | 1 | 579  | 0  | 0  | 8  |      | 1.00 | 0  | 0  | 2  | 0  | 0  | 2  |
| IPI00122862.4 | Q922D8 | Mthfd1    | C-1-tetrahydrofolate synthase, cytoplasmic                 |  | X | X    | 2 | 935  | 0  | 26 | 18 | 1.00 | 1.00 | 0  | 21 | 13 | 0  | 21 | 13 |
| IPI00228113.5 | Q3V3R1 | Mthfd1l   | Monofunctional C1-tetrahydrofolate synthase, mitochondrial |  | X | X    | 4 | 1024 | 0  | 22 | 5  | 1.00 | 1.00 | 0  | 18 | 5  | 0  | 18 | 5  |
| IPI00228583.5 | P62774 | Mtpn      | Myotrophin                                                 |  | X |      | 0 | 118  | 20 | 0  | 0  | 1.00 |      | 2  | 0  | 0  | 2  | 0  | 0  |
| IPI00132938.2 | Q35682 | Myadm     | Myeloid-associated differentiation marker                  |  | X |      | 6 | 320  | 0  | 0  | 8  |      | 1.00 | 0  | 0  | 2  | 0  | 0  | 2  |
| IPI00331361.2 | Q7TPV4 | Mybbp1a   | Myb-binding protein 1A                                     |  | X | X    | 4 | 1344 | 0  | 44 | 35 | 1.00 | 1.00 | 0  | 44 | 37 | 0  | 42 | 36 |

|               |          |        |                                                                                                 |   |   |   |          |    |      |    |    |    |      |      |      |    |    |    |    |    |    |
|---------------|----------|--------|-------------------------------------------------------------------------------------------------|---|---|---|----------|----|------|----|----|----|------|------|------|----|----|----|----|----|----|
| IPI00608114.2 | Q7TPH6   | Mycbp2 | pam, highwire, rpm 1                                                                            |   |   | X |          | 7  | 4746 | 0  | 0  | 3  |      | 1.00 | 0    | 0  | 8  | 0  | 0  | 8  |    |
| IPI00226891.1 | Q8C854   | Myef2  | Myelin expression factor 2                                                                      | X | X |   |          | 1  | 591  | 4  | 4  | 0  | 0.99 | 1.00 | 2    | 2  | 0  | 2  | 2  | 0  |    |
| IPI00122392.1 | Q9JK81   | Myg1   | UPF0160 protein MYG1, mitochondrial                                                             | X |   |   |          | 0  | 380  | 19 | 0  | 0  | 1.00 |      | 5    | 0  | 0  | 5  | 0  | 0  |    |
| IPI00757312.1 | Q3UH59   | Myh10  | Putative uncharacterized protein                                                                |   | X | X |          | 2  | 2013 | 0  | 28 | 8  |      | 1.00 | 1.00 | 0  | 48 | 14 | 0  | 47 | 14 |
| IPI00129404.1 | Q02566   | Myh6   | Myosin-6                                                                                        | X |   |   |          | 0  | 1938 | 3  | 0  | 0  | 1.00 |      | 4    | 0  | 0  | 4  | 0  | 0  |    |
| IPI00123181.4 | Q8VDD5   | Myh9   | Myosin-9                                                                                        | X | X | X |          | 1  | 1960 | 11 | 39 | 17 | 1.00 | 1.00 | 1.00 | 16 | 71 | 25 | 15 | 70 | 25 |
| IPI00118120.1 | Q99104   | Myo5a  | Myosin-Va                                                                                       |   |   | X |          | 3  | 1853 | 0  | 0  | 2  |      | 0.91 | 0    | 0  | 4  | 0  | 0  | 4  |    |
| IPI00229766.1 | Q9QY06-2 | Myo9b  | Myosin-IXb                                                                                      | X |   |   |          | 4  | 2143 | 2  | 0  | 0  | 1.00 |      | 2    | 0  | 0  | 2  | 0  | 0  |    |
| IPI00111831.1 | P70670   | Naca   | Nascent polypeptide-associated complex subunit alpha, muscle-specific form                      | X | X | X | 2DLC     | 0  | 2187 | 4  | 3  | 1  | 1.00 | 1.00 | 1.00 | 6  | 4  | 2  | 6  | 4  | 2  |
| IPI00114925.1 | Q99J77   | Nans   | Putative uncharacterized protein                                                                | X |   |   |          | 1  | 359  | 37 | 0  | 0  | 1.00 |      | 7    | 0  | 0  | 6  | 0  | 0  |    |
| IPI00123199.1 | P28656   | Nap111 | Nucleosome assembly protein 1-like 1                                                            |   | X | X |          | 0  | 391  | 0  | 30 | 22 |      | 1.00 | 1.00 | 0  | 6  | 6  | 0  | 6  | 6  |
| IPI00881096.1 | Q9CWX7   | Napg   | Gamma-soluble NSF attachment protein                                                            | X |   | X |          | 0  | 353  | 7  | 0  | 6  | 1.00 | 0.99 | 2    | 0  | 2  | 2  | 0  | 2  |    |
| IPI00387212.1 | Q80UM3   | Narg1  | NMDA receptor-regulated protein 1                                                               | X | X | X |          | 0  | 865  | 3  | 19 | 5  | 1.00 | 1.00 | 1.00 | 2  | 12 | 4  | 2  | 12 | 4  |
| IPI00223415.4 | Q8BP47   | Nars   | Asparaginyl-tRNA synthetase, cytoplasmic nuclear autoantigenic sperm protein isoform 2          |   | X | X |          | 0  | 559  | 0  | 8  | 6  |      | 1.00 | 1.00 | 0  | 4  | 2  | 0  | 4  | 2  |
| IPI00830976.1 | B1AU75   | Nasp   | Nuclear autoantigenic sperm protein isoform 2                                                   | X | X | X | 2DLC, UF | 0  | 773  | 39 | 43 | 22 | 1.00 | 1.00 | 1.00 | 16 | 20 | 14 | 15 | 20 | 13 |
| IPI00276866.1 | Q8K224   | Nat10  | N-acetyltransferase 10                                                                          |   | X | X |          | 2  | 1024 | 0  | 8  | 5  |      | 1.00 | 0.97 | 0  | 5  | 3  | 0  | 5  | 3  |
| IPI00400163.3 | Q6PGB6-4 | Nat13  | N-acetyltransferase NAT13                                                                       |   | X |   |          | 0  | 175  | 0  | 12 | 0  |      | 1.00 |      | 0  | 2  | 0  | 0  | 2  | 0  |
| IPI00172226.3 | Q8K2Z4-2 | Ncapd2 | Condensin complex subunit 1                                                                     | X | X |   |          | 5  | 1404 | 0  | 9  | 7  |      | 1.00 | 1.00 | 0  | 8  | 7  | 0  | 8  | 7  |
| IPI00122202.5 | B2RQA7   | Ncapg  | non-SMC condensin I complex, subunit G                                                          |   | X |   |          | 3  | 1004 | 0  | 5  | 0  |      | 1.00 |      | 0  | 4  | 0  | 0  | 4  | 0  |
| IPI00317794.5 | P09405   | Ncl    | Nucleolin                                                                                       | X | X | X |          | 0  | 707  | 12 | 33 | 25 | 1.00 | 1.00 | 1.00 | 6  | 25 | 18 | 6  | 24 | 18 |
| IPI00113730.3 | Q05BA5   | Ncoa3  | nuclear receptor coactivator 3                                                                  | X |   |   |          | 0  | 1403 | 5  | 0  | 0  | 0.99 |      | 3    | 0  | 0  | 3  | 0  | 0  |    |
| IPI00274795.4 | Q5RIM6   | Ncor1  | Nuclear receptor co-repressor 1                                                                 | X |   |   |          | 0  | 2454 | 3  | 0  | 0  | 0.99 |      | 4    | 0  | 0  | 3  | 0  | 0  |    |
| IPI00553262.1 | P03921   | ND5    | NADH-ubiquinone oxidoreductase chain 5 isoform 1 of Nuclear distribution protein nudE homolog 1 |   | X |   |          | 14 | 607  | 0  | 5  | 0  |      | 1.00 |      | 0  | 2  | 0  | 0  | 2  | 0  |
| IPI00112460.1 | Q9CZA6   | Nde1   | nudE homolog 1                                                                                  | X |   |   | 2DLC     | 0  | 344  | 19 | 0  | 0  | 1.00 |      | 5    | 0  | 0  | 5  | 0  | 0  |    |
| IPI00131850.3 | Q9CPR8   | Ndn12  | Melanoma-associated antigen G1                                                                  | X |   |   |          | 1  | 279  | 11 | 0  | 0  | 1.00 |      | 2    | 0  | 0  | 2  | 0  | 0  |    |
| IPI00315302.5 | Q9CQ75   | Ndufa2 | NADH dehydrogenase [ubiquinone] 1 alpha subcomplex subunit 2                                    |   | X |   |          | 0  | 99   | 0  | 40 | 0  |      | 1.00 |      | 0  | 5  | 0  | 0  | 5  | 0  |
| IPI00132216.1 | Q9CQ91   | Ndufa3 | NADH dehydrogenase [ubiquinone] 1 alpha subcomplex subunit 3                                    |   | X |   |          | 1  | 84   | 0  | 21 | 0  | 0.99 |      | 0    | 2  | 0  | 0  | 2  | 0  |    |
| IPI00125929.2 | Q62425   | Ndufa4 | NADH dehydrogenase [ubiquinone] 1 alpha subcomplex subunit 4                                    |   | X |   |          | 0  | 82   | 0  | 48 | 0  |      | 1.00 |      | 0  | 5  | 0  | 0  | 5  | 0  |
| IPI00308882.4 | Q91VD9   | Ndufs1 | NADH-ubiquinone oxidoreductase 75 kDa subunit, mitochondrial                                    |   | X |   |          | 1  | 727  | 0  | 29 | 0  |      | 1.00 |      | 0  | 14 | 0  | 0  | 13 | 0  |
| IPI00128345.2 | P52503   | Ndufs6 | NADH dehydrogenase [ubiquinone] iron-sulfur protein 6, mitochondrial                            |   | X |   |          | 0  | 116  | 0  | 41 | 0  |      | 1.00 |      | 0  | 3  | 0  | 0  | 3  | 0  |
| IPI00462445.2 | P46935   | Nedd4  | E3 ubiquitin-protein ligase NEDD4                                                               | X | X | X |          | 1  | 887  | 5  | 2  | 18 | 1.00 | 1.00 | 1.00 | 3  | 2  | 10 | 3  | 2  | 10 |
| IPI00127021.1 | P29595   | Nedd8  | NEDD8                                                                                           |   | X |   |          | 0  | 81   | 0  | 42 | 0  | 0.97 |      | 0    | 3  | 0  | 0  | 3  | 0  |    |
| IPI00132005.1 | Q9CQ45   | Nenf   | Neudesin                                                                                        | X |   |   |          | 0  | 171  | 19 | 0  | 0  | 1.00 |      | 2    | 0  | 0  | 2  | 0  | 0  |    |
| IPI00453692.4 | Q6P5H2   | Nes    | Isoform 1 of Nestin                                                                             | X |   |   | 2DLC     | 0  | 1864 | 3  | 0  | 0  | 0.99 |      | 2    | 0  | 0  | 2  | 0  | 0  |    |
| IPI00123537.3 | B1AY10   | Nfx1   | Isoform 1 of Transcriptional repressor NF-X1                                                    | X |   |   | 2DLC     | 0  | 1114 | 3  | 0  | 0  | 1.00 |      | 2    | 0  | 0  | 2  | 0  | 0  |    |
| IPI00119201.1 | Q9DB96   | Ngdn   | Neuroguidin                                                                                     | X |   |   |          | 0  | 315  | 9  | 0  | 0  | 1.00 |      | 3    | 0  | 0  | 3  | 0  | 0  |    |
| IPI00310568.2 | Q99KS2   | Ngrn   | neugrin                                                                                         | X |   |   |          | 0  | 293  | 20 | 0  | 0  | 1.00 |      | 3    | 0  | 0  | 3  | 0  | 0  |    |
| IPI00133555.4 | Q9CXX8   | Nip7   | 60S ribosome subunit biogenesis protein NIP7 homolog                                            |   |   | X |          | 0  | 180  | 0  | 0  | 32 |      | 0.99 | 0    | 0  | 4  | 0  | 0  | 4  |    |
| IPI00421052.1 | Q6KCD5   | Nipbl  | Nipped-B-like protein                                                                           | X |   |   |          | 4  | 2798 | 2  | 0  | 0  | 1.00 |      | 3    | 0  | 0  | 3  | 0  | 0  |    |
| IPI00119945.1 | Q9JHW2   | Nit2   | Nitrilase homolog 2                                                                             | X |   |   |          | 0  | 276  | 10 | 0  | 0  | 1.00 |      | 2    | 0  | 0  | 2  | 0  | 0  |    |

|               |          |        |                                                                         |   |   |   |          |  |    |      |    |    |    |      |      |      |    |    |    |    |    |    |
|---------------|----------|--------|-------------------------------------------------------------------------|---|---|---|----------|--|----|------|----|----|----|------|------|------|----|----|----|----|----|----|
| IPI00228608.1 | Q8CCN1   | Nlrp10 | NACHT, LRR and PYD domains-containing protein 10                        |   |   | X |          |  | 0  | 673  | 0  | 0  | 6  |      | 0.94 | 0    | 0  | 2  | 0  | 0  | 2  |    |
| IPI00881976.1 | Q99L48   | Nmd3   | Isoform 1 of 60S ribosomal export protein NMD3                          | X |   |   | 2DLC     |  | 0  | 503  | 7  | 0  | 0  | 0.99 |      | 2    | 0  | 0  | 2  | 0  | 0  |    |
| IPI00127417.1 | Q01768   | Nme2   | Nucleoside diphosphate kinase B                                         | X | X | X |          |  | 0  | 152  | 34 | 69 | 68 | 1.00 | 1.00 | 1.00 | 6  | 10 | 10 | 3  | 9  | 8  |
| IPI00224128.7 | O70310   | Nmt1   | Glycylpeptide N-tetradecanoyltransferase 1                              | X | X |   |          |  | 0  | 496  | 25 | 14 | 0  | 1.00 | 1.00 |      | 10 | 4  | 0  | 9  | 4  | 0  |
| IPI00117252.1 | O70311   | Nmt2   | Glycylpeptide N-tetradecanoyltransferase 2                              | X |   |   |          |  | 0  | 529  | 10 | 0  | 0  | 1.00 |      | 5    | 0  | 0  | 4  | 0  | 0  |    |
| IPI00125382.2 | Q9VW70   | Noc2l  | Nucleolar complex protein 2 homolog                                     |   | X | X |          |  | 4  | 747  | 0  | 5  | 8  | 1.00 | 1.00 | 0    | 2  | 4  | 0  | 2  | 4  |    |
| IPI00330054.1 | Q8BHY2   | Noc4l  | Nucleolar complex protein 4 homolog                                     |   | X |   |          |  | 3  | 516  | 0  | 11 | 0  | 1.00 |      | 0    | 2  | 0  | 0  | 2  | 0  |    |
| IPI00153791.2 | Q8BJW5   | Nol11  | Nucleolar protein 11                                                    |   |   | X |          |  | 3  | 723  | 0  | 0  | 12 |      | 1.00 | 0    | 0  | 5  | 0  | 0  | 5  |    |
| IPI00307884.1 | Q8BG17   | Nol12  | Nucleolar protein 12                                                    |   | X |   |          |  | 0  | 217  | 31 | 0  | 0  | 1.00 |      | 4    | 0  | 0  | 3  | 0  | 0  |    |
| IPI00353796.4 | Q8R5K4   | Nol6   | Nucleolar protein 6                                                     |   |   | X | X        |  | 1  | 1152 | 0  | 5  | 5  | 1.00 | 1.00 | 0    | 3  | 3  | 0  | 3  | 3  |    |
| IPI00318561.1 | Q9D7Z3   | Nol7   | Nucleolar protein 7                                                     |   |   |   | X        |  | 0  | 254  | 0  | 0  | 10 |      | 1.00 | 0    | 0  | 2  | 0  | 0  | 2  |    |
| IPI00720058.4 |          | Nolc1  | Nucleolar and coiled-body phosphoprotein 1                              |   |   | X | X        |  | 0  | 702  | 0  | 5  | 7  | 1.00 | 1.00 | 0    | 3  | 6  | 0  | 3  | 6  |    |
| IPI00222429.6 | Q6GQT9   | Nomo1  | nodal modulator 1                                                       |   | X |   |          |  | 3  | 1214 | 0  | 6  | 0  | 1.00 |      | 0    | 3  | 0  | 0  | 3  | 0  |    |
| IPI00320016.7 | Q99K48   | Nono   | Isoform 1 of Non-POU domain-containing octamer-binding protein          | X | X | X | 2DLC, UF |  | 0  | 473  | 43 | 11 | 19 | 1.00 | 1.00 | 1.00 | 25 | 4  | 5  | 15 | 4  | 5  |
| IPI00458704.2 | Q9CPT5   | Nop16  | Nucleolar protein 16                                                    | X |   |   |          |  | 0  | 178  | 44 | 0  | 0  | 1.00 |      | 9    | 0  | 0  | 7  | 0  | 0  |    |
| IPI00311453.5 |          | Nop2   | nucleolar protein 1                                                     | X | X | X |          |  | 0  | 794  | 11 | 7  | 12 | 1.00 | 0.99 | 1.00 | 4  | 3  | 7  | 4  | 3  | 7  |
| IPI00318048.5 | Q9D6Z1   | Nop56  | Nucleolar protein 56                                                    | X | X | X |          |  | 1  | 580  | 7  | 28 | 24 | 1.00 | 1.00 | 1.00 | 3  | 12 | 11 | 3  | 12 | 11 |
| IPI00463468.3 | Q6DFW4   | Nop58  | Nucleolar protein 58                                                    | X | X | X |          |  | 1  | 536  | 9  | 18 | 23 | 1.00 | 1.00 | 1.00 | 3  | 7  | 9  | 3  | 7  | 9  |
| IPI00130000.1 | Q11011   | Npepps | Puromycin-sensitive aminopeptidase                                      |   | X | X |          |  | 2  | 920  | 0  | 12 | 11 |      | 1.00 | 1.00 | 0  | 7  | 7  | 0  | 7  | 7  |
| IPI00127415.1 | Q61937   | Npm1   | Nucleophosmin                                                           |   |   | X | X        |  | 0  | 292  | 0  | 38 | 34 |      | 1.00 | 1.00 | 0  | 16 | 9  | 0  | 12 | 8  |
| IPI00553335.1 | Q8VCQ3   | Nrbf2  | Nuclear receptor-binding factor 2                                       |   | X |   |          |  | 0  | 287  | 15 | 0  | 0  | 1.00 |      | 3    | 0  | 0  | 3  | 0  | 0  |    |
| IPI00648408.1 | A2A9Q2   | Nrd1   | Nardilysin, N-arginine dibasic convertase, NRD convertase 1             |   |   | X |          |  | 1  | 1229 | 0  | 0  | 5  |      | 0.99 | 0    | 0  | 3  | 0  | 0  | 3  |    |
| IPI00131111.2 | Q96L73   | Nsd1   | nuclear receptor-binding SET-domain protein 1                           | X |   |   |          |  | 0  | 2691 | 5  | 0  | 0  | 1.00 |      | 9    | 0  | 0  | 9  | 0  | 0  |    |
| IPI00656325.2 | P46460   | Nsf    | Vesicle-fusing ATPase                                                   |   |   | X | X        |  | 1  | 744  | 0  | 16 | 3  |      | 1.00 | 1.00 | 0  | 8  | 2  | 0  | 8  | 2  |
| IPI00387232.1 | Q9CZ44-3 | Nsfl1c | NSFL1 cofactor p47                                                      | X | X | X |          |  | 0  | 372  | 48 | 7  | 10 | 1.00 | 1.00 | 1.00 | 16 | 2  | 3  | 13 | 2  | 3  |
| IPI00133614.5 | Q91VT1   | Nsmce2 | E3 SUMO-protein ligase NSE2                                             | X |   |   |          |  | 0  | 247  | 13 | 0  | 0  | 0.99 |      | 2    | 0  | 0  | 2  | 0  | 0  |    |
| IPI00228804.5 | Q1HFZ0   | Nsun2  | tRNA (cytosine-5-)-methyltransferase NSUN2                              | X | X | X |          |  | 0  | 782  | 33 | 7  | 11 | 1.00 | 1.00 | 1.00 | 14 | 4  | 6  | 14 | 4  | 6  |
| IPI00132314.1 | Q02819   | Nucb1  | Nucleobindin-1                                                          | X |   |   |          |  | 0  | 459  | 27 | 0  | 0  | 1.00 |      | 8    | 0  | 0  | 8  | 0  | 0  |    |
| IPI00309704.1 | P81117   | Nucb2  | Nucleobindin-2                                                          | X |   |   |          |  | 0  | 420  | 7  | 0  | 0  | 1.00 |      | 2    | 0  | 0  | 2  | 0  | 0  |    |
| IPI00132942.1 | Q35685   | Nudc   | Nuclear migration protein nudC                                          | X | X | X |          |  | 0  | 332  | 33 | 28 | 22 | 1.00 | 1.00 | 1.00 | 12 | 9  | 6  | 10 | 9  | 6  |
| IPI00461281.2 | Q9CQ48   | Nudcd2 | NudC domain-containing protein 2                                        | X |   |   |          |  | 0  | 157  | 22 | 0  | 0  | 1.00 |      | 2    | 0  | 0  | 2  | 0  | 0  |    |
| IPI00132473.3 | Q9CQF3   | Nudt21 | Cleavage and polyadenylation specificity factor subunit 5               |   |   | X | X        |  | 0  | 227  | 0  | 36 | 21 |      | 1.00 | 1.00 | 0  | 6  | 2  | 0  | 6  | 2  |
| IPI00123572.1 | Q9JKX6   | Nudt5  | ADP-sugar pyrophosphatase                                               | X |   |   |          |  | 0  | 218  | 21 | 0  | 0  | 1.00 |      | 6    | 0  | 0  | 5  | 0  | 0  |    |
| IPI00405390.1 | Q8BVU5   | Nudt9  | ADP-ribose pyrophosphatase, mitochondrial                               | X |   |   |          |  | 0  | 350  | 7  | 0  | 0  | 1.00 |      | 2    | 0  | 0  | 2  | 0  | 0  |    |
| IPI00330146.6 | Q5F2E7   | Nufip2 | Isoform 1 of Nuclear fragile X mental retardation-interacting protein 2 | X |   |   | 2DLC     |  | 0  | 692  | 22 | 0  | 0  | 1.00 |      | 7    | 0  | 0  | 7  | 0  | 0  |    |
| IPI00263048.1 | Q80Y35   | Numa1  | Nuclear mitotic apparatus protein 1                                     | X | X | X |          |  | 0  | 2094 | 2  | 9  | 7  | 1.00 | 1.00 | 1.00 | 3  | 14 | 10 | 3  | 14 | 10 |
| IPI00320303.1 | Q8R0G9   | Nup133 | Nuclear pore complex protein Nup133                                     |   |   | X |          |  | 0  | 1155 | 0  | 0  | 9  |      | 1.00 | 0    | 0  | 5  | 0  | 0  | 5  |    |
| IPI00330624.1 | Q80WR0   | Nup153 | Nucleoporin 153                                                         | X |   | X |          |  | 0  | 1462 | 16 | 0  | 3  | 1.00 |      | 1.00 | 11 | 0  | 3  | 11 | 0  | 3  |
| IPI00453821.2 | Q99P88   | Nup155 | Nuclear pore complex protein Nup155                                     |   | X | X |          |  | 0  | 1391 | 0  | 5  | 4  |      | 1.00 | 1.00 | 0  | 5  | 3  | 0  | 5  | 3  |
| IPI00129535.1 | Q9Z0W3   | Nup160 | Nuclear pore complex protein Nup160                                     |   |   | X |          |  | 1  | 1402 | 0  | 0  | 6  |      | 0.95 | 0    | 0  | 4  | 0  | 0  | 4  |    |
| IPI00420602.3 | Q6ZQH8   | Nup188 | Nucleoporin NUP188 homolog                                              |   |   | X |          |  | 10 | 1759 | 0  | 4  | 0  |      | 1.00 | 0    | 4  | 0  | 0  | 4  | 0  |    |
| IPI00677736.2 | Q9D6C1   | Nup205 | Nucleoporin 205                                                         |   | X |   |          |  | 2  | 611  | 0  | 6  | 0  |      | 1.00 | 0    | 3  | 0  | 0  | 3  | 0  |    |
| IPI00229722.3 | Q80U93   | Nup214 | Nuclear pore complex protein Nup214                                     | X |   |   |          |  | 3  | 2085 | 4  | 0  | 0  | 1.00 |      | 4    | 0  | 0  | 4  | 0  | 0  |    |
| IPI00177202.1 | P59235   | Nup43  | Nucleoporin Nup43                                                       | X |   | X |          |  | 0  | 380  | 17 | 0  | 5  | 1.00 |      | 1.00 | 4  | 0  | 2  | 4  | 0  | 2  |
| IPI00120572.3 | Q9JIH2   | Nup50  | Nucleoporin 50 kDa                                                      | X |   |   |          |  | 0  | 466  | 32 | 0  | 0  | 1.00 |      | 9    | 0  | 0  | 9  | 0  | 0  |    |
| IPI00225192.1 | Q8BTS4   | Nup54  | Nucleoporin p54                                                         | X |   |   |          |  | 0  | 510  | 14 | 0  | 0  | 1.00 |      | 4    | 0  | 0  | 4  | 0  | 0  |    |

|               |          |          |                                                                                                                   |  |   |   |   |           |  |   |      |    |    |    |      |      |      |    |    |    |    |    |
|---------------|----------|----------|-------------------------------------------------------------------------------------------------------------------|--|---|---|---|-----------|--|---|------|----|----|----|------|------|------|----|----|----|----|----|
| IPI00139994.1 | Q63850   | Nup62    | Nuclear pore glycoprotein p62                                                                                     |  | X |   |   |           |  | 1 | 526  | 9  | 0  | 0  | 1.00 |      | 3    | 0  | 0  | 3  | 0  | 0  |
| IPI00461532.4 | Q8R480   | Nup85    | Nucleoporin NUP85                                                                                                 |  |   | X |   |           |  | 1 | 656  | 0  | 5  | 0  | 1.00 | 1.00 | 0    | 2  | 0  | 0  | 2  | 0  |
| IPI00229021.1 | Q8CEC0   | Nup88    | Nuclear pore complex protein Nup88                                                                                |  |   |   | X |           |  | 0 | 753  | 0  | 0  | 5  |      | 1.00 | 0    | 0  | 2  | 0  | 0  | 2  |
| IPI00222307.1 | Q8BJ71   | Nup93    | Isoform 1 of Nuclear pore complex protein Nup93                                                                   |  |   | X | X | UF        |  | 1 | 819  | 0  | 5  | 5  | 1.00 | 0.99 | 0    | 2  | 2  | 0  | 2  | 2  |
| IPI00464141.2 | Q6PFD9   | Nup98    | Nucleoporin 98                                                                                                    |  | X |   |   |           |  | 0 | 1187 | 15 | 0  | 0  | 1.00 |      | 13   | 0  | 0  | 10 | 0  | 0  |
| IPI00224693.2 | Q9ERH4   | Nusap1   | Isoform 1 of Nucleolar and spindle-associated protein 1                                                           |  | X |   |   | 2DLC      |  | 0 | 427  | 9  | 0  | 0  | 1.00 |      | 2    | 0  | 0  | 2  | 0  | 0  |
| IPI00321884.1 | Q9DBY8   | Nvl      | Nuclear valosin-containing protein-like                                                                           |  |   |   | X |           |  | 0 | 855  | 0  | 0  | 7  |      | 1.00 | 0    | 0  | 3  | 0  | 0  | 3  |
| IPI00115588.3 | Q99JX7   | Nxf1     | Nuclear RNA export factor 1                                                                                       |  | X | X |   |           |  | 0 | 618  | 7  | 6  | 0  | 0.94 | 1.00 | 3    | 2  | 0  | 3  | 2  | 0  |
| IPI00133608.3 | Q9CRD0   | Ociad1   | OCIA domain-containing protein 1                                                                                  |  |   |   | X |           |  | 1 | 247  | 0  | 0  | 11 |      | 1.00 | 0    | 0  | 2  | 0  | 0  | 2  |
| IPI00845652.1 | Q60597-3 | Ogdh     | Isoform 1 or 3 of 2-oxoglutarate dehydrogenase E1 component, mitochondrial                                        |  |   | X | X | 1DE       |  | 1 | 1038 | 0  | 15 | 7  | 1.00 | 1.00 | 0    | 12 | 4  | 0  | 12 | 4  |
| IPI00342603.7 |          | Ogdhl    | oxoglutarate dehydrogenase-like                                                                                   |  |   | X |   |           |  | 1 | 1029 | 0  | 8  | 0  | 1.00 |      | 0    | 7  | 0  | 0  | 7  | 0  |
| IPI00111981.1 | Q9CZ30   | Ola1     | Isoform 1 of Obg-like ATPase 1                                                                                    |  | X | X | X | 2DLC      |  | 1 | 396  | 27 | 8  | 8  | 1.00 | 1.00 | 1.00 | 9  | 3  | 3  | 8  | 3  |
| IPI00380674.1 | Q7TS44   | Olfir192 | Olfactory receptor Olfir192                                                                                       |  |   |   | X |           |  | 7 | 307  | 0  | 0  | 3  |      | 0.90 | 0    | 0  | 2  | 0  | 0  | 2  |
| IPI00881883.2 |          | Olfir286 | olfactory receptor 286                                                                                            |  |   |   | X |           |  | 5 | 323  | 0  | 0  | 21 |      | 0.98 | 0    | 0  | 3  | 0  | 0  | 3  |
| IPI00403336.4 | P58281-2 | Opa1     | Dynamin-like 120 kDa protein, mitochondrial                                                                       |  |   |   | X |           |  | 1 | 997  | 0  | 4  | 0  | 1.00 |      | 0    | 3  | 0  | 0  | 3  | 0  |
| IPI00165817.3 | Q3U473   | ORF19    | Putative uncharacterized protein                                                                                  |  | X |   |   |           |  | 0 | 506  | 6  | 0  | 0  | 1.00 |      | 2    | 0  | 0  | 2  | 0  | 0  |
| IPI00845721.1 | Q8R1N3   | 657      | Novel KRAB box domain containing protein                                                                          |  |   | X |   |           |  | 0 | 573  | 6  | 0  | 0  | 0.98 |      | 2    | 0  | 0  | 2  | 0  | 0  |
| IPI00169908.4 | A2AP24   | Otd6b    | OTU domain containing 6B                                                                                          |  | X |   |   |           |  | 0 | 325  | 10 | 0  | 0  | 1.00 |      | 2    | 0  | 0  | 2  | 0  | 0  |
| IPI00223738.2 | Q6P9R2   | Oxsr1    | Serine/threonine-protein kinase OSR1                                                                              |  | X |   | X |           |  | 2 | 527  | 5  | 0  | 5  | 1.00 | 1.00 | 2    | 0  | 3  | 2  | 0  | 3  |
| IPI00122815.3 | Q922C8   | P4hb     | Putative uncharacterized protein                                                                                  |  |   | X | X |           |  | 0 | 509  | 0  | 28 | 22 | 1.00 | 1.00 | 0    | 10 | 9  | 0  | 10 | 9  |
| IPI00119305.3 | P50580   | Pa2g4    | Proliferation-associated protein 2G4                                                                              |  | X | X | X |           |  | 1 | 394  | 40 | 43 | 25 | 1.00 | 1.00 | 1.00 | 9  | 12 | 9  | 9  | 12 |
| IPI00124287.1 | P29341   | Pabpc1   | Polyadenylate-binding protein 1                                                                                   |  | X | X | X |           |  | 0 | 636  | 32 | 35 | 28 | 1.00 | 1.00 | 1.00 | 20 | 25 | 15 | 16 | 21 |
| IPI00120954.2 | Q62029   | Pabpc2   | poly A binding protein, cytoplasmic 2                                                                             |  | X |   |   |           |  | 0 | 628  | 6  | 0  | 0  | 1.00 |      | 5    | 0  | 0  | 5  | 0  | 0  |
| IPI00420950.3 | Q6PHQ9   | Pabpc4   | MCG5546                                                                                                           |  | X |   | X |           |  | 0 | 660  | 13 | 0  | 12 | 0.00 | 1.00 | 8    | 0  | 6  | 5  | 0  | 6  |
| IPI00136169.1 | Q8CCS6   | Pabpn1   | Polyadenylate-binding protein 2                                                                                   |  | X |   |   |           |  | 0 | 302  | 15 | 0  | 0  | 1.00 |      | 6    | 0  | 0  | 4  | 0  | 0  |
| IPI00125880.1 | Q9WVE8   | Pacsin2  | Protein kinase C and casein kinase substrate in neurons protein 2                                                 |  | X |   |   |           |  | 0 | 486  | 6  | 0  | 0  | 1.00 |      | 2    | 0  | 0  | 2  | 0  | 0  |
| IPI00319933.4 | Q99JB8   | Pacsin3  | Protein kinase C and casein kinase II substrate protein 3                                                         |  | X |   |   |           |  | 0 | 424  | 6  | 0  | 0  | 1.00 |      | 2    | 0  | 0  | 2  | 0  | 0  |
| IPI00309207.5 | P63005   | Pafah1b1 | Platelet-activating factor acetylhydrolase IB subunit alpha                                                       |  |   |   | X |           |  | 0 | 410  | 0  | 0  | 4  |      | 0.99 | 0    | 0  | 2  | 0  | 0  | 2  |
| IPI00624863.1 | Q9CQ38   | Paics    | Phosphoribosylaminoimidazole carboxylase, phosphoribosylaminoribosylaminoimidazole, succinocarboxamide synthetase |  |   | X | X |           |  | 1 | 425  | 0  | 43 | 29 | 1.00 | 1.00 | 0    | 13 | 7  | 0  | 13 | 7  |
| IPI00132993.1 | O88643   | Pak1     | Serine/threonine-protein kinase PAK 1                                                                             |  | X |   |   |           |  | 0 | 545  | 8  | 0  | 0  | 0.96 |      | 2    | 0  | 0  | 2  | 0  | 0  |
| IPI00120790.2 | Q9DCE5   | Pak1ip1  | p21-activated protein kinase-interacting protein 1                                                                |  |   | X |   |           |  | 0 | 382  | 0  | 5  | 0  | 0.96 |      | 0    | 2  | 0  | 0  | 2  | 0  |
| IPI00229884.1 | Q8CIN4   | Pak2     | Serine/threonine-protein kinase PAK 2                                                                             |  | X |   |   |           |  | 0 | 524  | 11 | 0  | 0  | 1.00 |      | 3    | 0  | 0  | 3  | 0  | 0  |
| IPI00858000.1 | Q9ET54   | Palld    | Palladin                                                                                                          |  |   |   | X |           |  | 0 | 1408 | 0  | 0  | 3  |      | 1.00 | 0    | 0  | 2  | 0  | 0  | 2  |
| IPI00117264.1 | Q99LX0   | Park7    | Protein DJ-1                                                                                                      |  | X | X | X |           |  | 1 | 189  | 77 | 23 | 41 | 1.00 | 1.00 | 1.00 | 11 | 3  | 4  | 10 | 3  |
| IPI00139168.2 | Q3TF18   | Parp1    | Putative uncharacterized protein                                                                                  |  | X | X | X |           |  | 0 | 1014 | 8  | 26 | 14 | 1.00 | 1.00 | 1.00 | 6  | 19 | 12 | 6  | 19 |
| IPI00112473.2 | P11103   | Parp1    | Isoform Long of Poly [ADP-ribose] polymerase 1                                                                    |  | X | X |   | 2DLC, 1DE |  | 0 | 1013 | 8  | 17 | 0  | 1.00 | 1.00 | 5    | 12 | 0  | 5  | 12 | 0  |
| IPI00551075.4 | Q2EMV9   | Parp14   | Isoform 1 of Poly [ADP-ribose] polymerase 14                                                                      |  |   |   | X | UF        |  | 1 | 1817 | 0  | 0  | 1  |      | 0.99 | 0    | 0  | 2  | 0  | 0  | 2  |
| IPI00354432.4 | Q925B0   | Pawr     | Isoform 1 of PRKC apoptosis WT1 regulator protein                                                                 |  | X |   |   | 2DLC      |  | 0 | 333  | 21 | 0  | 0  | 1.00 |      | 5    | 0  | 0  | 5  | 0  | 0  |
| IPI00461676.5 | Q8BSQ9   | Pbrm1    | polybromo 1                                                                                                       |  | X |   |   |           |  | 0 | 1704 | 4  | 0  | 0  | 0.99 |      | 3    | 0  | 0  | 3  | 0  | 0  |
| IPI00128904.1 | P60335   | Pcbp1    | Poly(rC)-binding protein 1                                                                                        |  | X | X | X |           |  | 1 | 356  | 22 | 37 | 36 | 1.00 | 1.00 | 1.00 | 5  | 9  | 9  | 4  | 9  |
| IPI00127707.1 | Q61990   | Pcbp2    | Poly(rC)-binding protein 2                                                                                        |  | X | X | X |           |  | 1 | 362  | 11 | 24 | 23 | 1.00 | 1.00 | 1.00 | 3  | 8  | 7  | 2  | 8  |



|               |          |         |                                                                                               |  |  |   |   |      |   |      |    |    |    |      |      |      |    |    |    |    |    |    |
|---------------|----------|---------|-----------------------------------------------------------------------------------------------|--|--|---|---|------|---|------|----|----|----|------|------|------|----|----|----|----|----|----|
| IPI00356667.4 | Q5HZI5   | Pcdh17  | Protocadherin 17                                                                              |  |  |   | X |      | 1 | 1157 | 0  | 0  | 5  | 0.96 | 0    | 0    | 2  | 0  | 0  | 2  |    |    |
| IPI00223060.1 | Q8BH04   | Pck2    | mitochondrial phosphoenolpyruvate carboxykinase 2                                             |  |  | X |   |      | 0 | 667  | 0  | 8  | 0  | 1.00 | 0    | 3    | 0  | 0  | 3  | 0  |    |    |
| IPI00752192.1 | Q9QYX7-4 | Pclo    | Protein piccolo                                                                               |  |  |   | X |      | 3 | 5177 | 0  | 0  | 2  | 0.90 | 0    | 0    | 6  | 0  | 0  | 6  |    |    |
| IPI00113870.1 | P17918   | Pcna    | Proliferating cell nuclear antigen                                                            |  |  | X | X |      | 0 | 261  | 0  | 62 | 33 | 1.00 | 1.00 | 0    | 11 | 7  | 0  | 11 | 7  |    |
| IPI00457623.3 | P48725   | Pcnt    | pericentrin                                                                                   |  |  |   | X |      | 2 | 2916 | 0  | 0  | 2  | 0.98 | 0    | 0    | 6  | 0  | 0  | 6  |    |    |
| IPI00115490.1 | P49586   | Pcylt1a | Choline-phosphate cytidylyltransferase A                                                      |  |  | X |   |      | 0 | 367  | 10 | 0  | 0  | 0.99 |      | 2    | 0  | 0  | 2  | 0  | 0  |    |
| IPI00551454.3 | Q6NS46   | Pdcd11  | Protein RRP5 homolog                                                                          |  |  | X | X | X    | 5 | 1862 | 5  | 9  | 7  | 1.00 | 1.00 | 1.00 | 6  | 10 | 10 | 6  | 10 | 9  |
| IPI00885252.1 | P56812   | Pdcd5   | Programmed cell death protein 5                                                               |  |  | X |   |      | 0 | 205  | 23 | 0  | 0  | 1.00 |      | 5    | 0  | 0  | 4  | 0  | 0  |    |
| IPI00337893.2 | P35486   | Pdha1   | Pyruvate dehydrogenase E1 component subunit alpha, somatic form, mitochondrial                |  |  | X | X | X    | 0 | 390  | 8  | 7  | 12 | 1.00 | 1.00 | 0.98 | 2  | 3  | 3  | 2  | 3  | 3  |
| IPI00132042.1 | Q9D051   | Pdhb    | Pyruvate dehydrogenase E1 component subunit beta, mitochondrial                               |  |  |   | X |      | 1 | 359  | 0  | 6  | 0  | 1.00 |      | 0    | 2  | 0  | 0  | 2  | 0  |    |
| IPI00230108.6 | P27773   | Pdia3   | Protein disulfide-isomerase A3                                                                |  |  | X | X | X    | 1 | 505  | 40 | 15 | 20 | 1.00 | 1.00 | 1.00 | 19 | 5  | 9  | 18 | 5  | 9  |
| IPI00271951.5 | Q3TT79   | Pdia4   | protein disulfide isomerase A4                                                                |  |  |   | X | X    | 0 | 641  | 0  | 6  | 5  | 1.00 | 1.00 | 0    | 4  | 3  | 0  | 4  | 3  |    |
| IPI00122362.1 | Q921X9   | Pdia5   | Protein disulfide-isomerase A5                                                                |  |  | X |   |      | 0 | 517  | 7  | 0  | 0  | 0.96 |      | 2    | 0  | 0  | 2  | 0  | 0  |    |
| IPI00222496.3 | Q3TML0   | Pdia6   | Putative uncharacterized protein                                                              |  |  | X | X | X    | 0 | 445  | 22 | 7  | 22 | 1.00 | 1.00 | 1.00 | 7  | 2  | 6  | 7  | 2  | 6  |
| IPI00309768.7 | O70400   | Pdlim1  | PDZ and LIM domain protein 1                                                                  |  |  | X |   | X    | 0 | 327  | 20 | 0  | 17 | 1.00 | 1.00 | 4    | 0  | 4  | 4  | 0  | 3  |    |
| IPI00845638.1 | Q4VA53-3 | Pds5b   | Sister chromatid cohesion protein PDS5 homolog B                                              |  |  |   | X |      | 1 | 1448 | 0  | 4  | 0  | 1.00 |      | 0    | 3  | 0  | 0  | 3  | 0  |    |
| IPI00112676.1 | Q9CZG9   | Pdzd11  | PDZ domain-containing protein 11                                                              |  |  | X |   |      | 0 | 140  | 47 | 0  | 0  | 1.00 |      | 3    | 0  | 0  | 3  | 0  | 0  |    |
| IPI00121013.1 | Q62048   | Pea15a  | Isoform 1 of Astrocytic phosphoprotein PEA-15                                                 |  |  | X |   | 2DLC | 0 | 130  | 37 | 0  | 0  | 1.00 |      | 4    | 0  | 0  | 4  | 0  | 0  |    |
| IPI00137730.7 | P70296   | Pebp1   | Phosphatidylethanolamine-binding protein 1                                                    |  |  | X | X | X    | 0 | 187  | 41 | 40 | 32 | 1.00 | 1.00 | 1.00 | 6  | 4  | 4  | 5  | 4  | 4  |
| IPI00321597.6 | Q9DBD5   | Pelp1   | Proline-, glutamic acid- and leucine-rich protein 1                                           |  |  |   | X | X    | 1 | 1123 | 0  | 9  | 9  | 1.00 | 1.00 | 0    | 6  | 6  | 0  | 6  | 6  |    |
| IPI00620167.2 | Q5SQ20   | Pes1    | Pescadillo homolog 1, containing BRCT domain                                                  |  |  |   | X | X    | 1 | 588  | 0  | 5  | 9  | 0.97 | 1.00 | 0    | 3  | 4  | 0  | 3  | 4  |    |
| IPI00461329.3 | Q9D0K1   | Pex13   | Peroxisomal membrane protein PEX13                                                            |  |  |   | X |      | 3 | 405  | 0  | 0  | 8  | 0.96 |      | 0    | 0  | 2  | 0  | 0  | 2  |    |
| IPI00265406.3 | Q5SUR0   | Pfas    | Phosphoribosylformylglycinamide synthase                                                      |  |  | X | X | X    | 2 | 1337 | 4  | 10 | 13 | 1.00 | 1.00 | 1.00 | 3  | 6  | 9  | 3  | 6  | 9  |
| IPI00132485.2 | Q9CWM4   | Pfdn1   | Prefoldin subunit 1                                                                           |  |  | X |   |      | 0 | 122  | 42 | 0  | 0  | 1.00 |      | 5    | 0  | 0  | 5  | 0  | 0  |    |
| IPI00119545.2 | O70591   | Pfdn2   | Prefoldin subunit 2                                                                           |  |  | X | X | X    | 0 | 154  | 36 | 20 | 17 | 1.00 | 1.00 | 1.00 | 5  | 2  | 2  | 4  | 2  | 2  |
| IPI00378557.3 | Q3UWL8   | Pfdn4   | Prefoldin 4                                                                                   |  |  | X |   |      | 0 | 134  | 34 | 0  | 0  | 1.00 |      | 4    | 0  | 0  | 4  | 0  | 0  |    |
| IPI00554862.2 | P12382   | Pfkl    | 6-phosphofructokinase, liver type                                                             |  |  |   | X | X    | 3 | 780  | 0  | 23 | 12 | 1.00 | 1.00 | 0    | 12 | 6  | 0  | 11 | 6  |    |
| IPI00124444.1 | Q9WUA3   | Pfkp    | 6-phosphofructokinase type C                                                                  |  |  |   | X |      | 2 | 784  | 0  | 6  | 0  | 1.00 |      | 0    | 4  | 0  | 0  | 3  | 0  |    |
| IPI00224740.6 | P62962   | Pfn1    | Profilin-1                                                                                    |  |  | X | X | X    | 0 | 140  | 37 | 66 | 61 | 1.00 | 1.00 | 1.00 | 5  | 10 | 8  | 4  | 8  | 7  |
| IPI00457898.3 | Q9DBJ1   | Pgam1   | Phosphoglycerate mutase 1                                                                     |  |  | X | X | X    | 0 | 254  | 25 | 69 | 62 | 0.99 | 1.00 | 1.00 | 3  | 16 | 10 | 3  | 14 | 10 |
| IPI00466919.7 | Q9DCD0   | Pgd     | 6-phosphogluconate dehydrogenase, decarboxylating                                             |  |  |   | X | X    | 3 | 483  | 0  | 9  | 11 | 1.00 | 1.00 | 0    | 3  | 4  | 0  | 3  | 4  |    |
| IPI00555069.3 | P09411   | Pgk1    | Phosphoglycerate kinase 1                                                                     |  |  | X | X | X    | 1 | 417  | 13 | 66 | 50 | 1.00 | 1.00 | 1.00 | 3  | 22 | 16 | 3  | 21 | 15 |
| IPI00132080.1 | Q9CQ60   | Pgls    | 6-phosphogluconolactonase                                                                     |  |  |   | X |      | 0 | 257  | 0  | 0  | 19 | 1.00 |      | 1.00 | 0  | 0  | 2  | 0  | 0  | 2  |
| IPI00830261.1 | B1AVP0   | Phactr2 | Phosphatase and actin regulator 2                                                             |  |  |   |   | X    | 0 | 632  | 0  | 0  | 6  | 0.95 |      | 0    | 0  | 3  | 0  | 0  | 3  |    |
| IPI00133440.1 | P67778   | Phb     | Prohibitin                                                                                    |  |  |   | X | X    | 0 | 272  | 0  | 69 | 45 | 1.00 | 1.00 | 0    | 14 | 9  | 0  | 14 | 9  |    |
| IPI00321718.4 | O35129   | Phb2    | Prohibitin-2                                                                                  |  |  | X | X | X    | 0 | 299  | 24 | 50 | 24 | 1.00 | 1.00 | 1.00 | 5  | 13 | 8  | 4  | 12 | 8  |
| IPI00225961.5 | Q61753   | Phgdh   | D-3-phosphoglycerate dehydrogenase                                                            |  |  |   | X | X    | 0 | 533  | 0  | 18 | 15 | 1.00 | 1.00 | 0    | 7  | 5  | 0  | 7  | 5  |    |
| IPI00264501.8 | Q7M6Y3   | Picalm  | Phosphatidylinositol-binding clathrin assembly protein                                        |  |  |   | X | X    | 1 | 660  | 0  | 7  | 13 | 1.00 | 1.00 | 0    | 2  | 4  | 0  | 2  | 4  |    |
| IPI00115695.1 | O70167   | Pik3c2g | Isoform 1 of Phosphatidylinositol-4-phosphate 3-kinase C2 domain-containing gamma polypeptide |  |  |   | X | 1DE  | 1 | 1506 | 0  | 2  | 0  | 0.92 |      | 0    | 2  | 0  | 0  | 2  | 0  |    |
| IPI00336318.1 | Q80X14   | Pip4k2b | Phosphatidylinositol-5-phosphate 4-kinase type-2 beta                                         |  |  | X |   |      | 0 | 416  | 7  | 0  | 0  | 1.00 |      | 2    | 0  | 0  | 2  | 0  | 0  |    |
| IPI00170126.4 | Q8K411   | Pitrm1  | Presequence protease, mitochondrial                                                           |  |  |   | X | X    | 0 | 1036 | 0  | 8  | 5  | 1.00 | 1.00 | 0    | 4  | 3  | 0  | 4  | 3  |    |

|               |          |          |                                                                                   |   |   |   |      |   |      |    |    |    |      |      |      |    |    |    |    |    |    |
|---------------|----------|----------|-----------------------------------------------------------------------------------|---|---|---|------|---|------|----|----|----|------|------|------|----|----|----|----|----|----|
| IPI00407130.4 | P52480   | Pkm2     | Isoform M2 of Pyruvate kinase isozymes M1/M2                                      | X | X | X | UF   | 0 | 531  | 43 | 69 | 49 | 1.00 | 1.00 | 1.00 | 21 | 41 | 24 | 20 | 35 | 23 |
| IPI00626385.4 | Q9QXS1   | Plec1    | Plectin                                                                           |   | X | X |      | 1 | 4691 | 0  | 3  | 2  | 1.00 | 1.00 | 1.00 | 0  | 9  | 9  | 0  | 9  | 9  |
| IPI00624550.4 | Q3UIL6-2 | Plekha7  | Isoform 2 of Plectstrin homology domain-containing family A member 7              | X |   |   | 2DLC | 0 | 1266 | 11 | 0  | 0  | 1.00 |      |      | 8  | 0  | 0  | 8  | 0  | 0  |
| IPI00319270.2 | Q9DBG5   | Plin3    | Mannose-6-phosphate receptor-binding protein 1                                    |   | X | X |      | 0 | 437  | 0  | 10 | 21 | 1.00 | 1.00 | 1.00 | 0  | 3  | 5  | 0  | 3  | 5  |
| IPI00344681.2 | Q3V0K9   | Pls1     | Plastin-1                                                                         | X |   |   |      | 2 | 630  | 6  | 0  | 0  | 1.00 |      |      | 2  | 0  | 0  | 2  | 0  | 0  |
| IPI00133709.5 | Q9D1G2   | Pmvk     | Phosphomevalonate kinase                                                          |   |   | X |      | 0 | 192  | 0  | 0  | 11 |      | 0.95 | 1.00 | 0  | 0  | 2  | 0  | 0  | 2  |
| IPI00785231.1 | Q3TUQ5   | Pnn      | pinin                                                                             |   | X |   |      | 0 | 726  | 0  | 3  | 0  | 0.98 | 1.00 | 1.00 | 0  | 2  | 0  | 0  | 2  | 0  |
| IPI00131909.1 | Q9CPS7   | Pno1     | RNA-binding protein PNO1                                                          | X | X |   |      | 1 | 248  | 26 | 0  | 23 | 1.00 | 1.00 | 1.00 | 5  | 0  | 5  | 5  | 0  | 5  |
| IPI00315452.5 | P23492   | Pnp1     | Purine nucleoside phosphorylase                                                   |   | X | X |      | 1 | 289  | 0  | 18 | 24 | 1.00 | 1.00 | 1.00 | 0  | 4  | 5  | 0  | 4  | 5  |
| IPI00135996.4 | Q8K4L4   | Pof1b    | Protein POF1B                                                                     | X |   |   |      | 0 | 593  | 3  | 0  | 0  | 0.99 | 1.00 | 1.00 | 2  | 0  | 0  | 2  | 0  | 0  |
| IPI00321912.2 | Q8K202   | Polr1e   | DNA-directed RNA polymerase I subunit RPA49                                       | X |   |   |      | 1 | 482  | 5  | 0  | 0  | 0.97 | 1.00 | 1.00 | 2  | 0  | 0  | 2  | 0  | 0  |
| IPI00136207.6 | P08775   | Polr2a   | DNA-directed RNA polymerase II subunit RPB1                                       |   | X |   |      | 1 | 1970 | 0  | 5  | 0  | 1.00 | 1.00 | 1.00 | 0  | 8  | 0  | 0  | 8  | 0  |
| IPI00268215.1 | Q9D7M8   | Polr2d   | DNA-directed RNA polymerase II subunit RPB4                                       | X |   |   |      | 0 | 142  | 49 | 0  | 0  | 1.00 | 1.00 | 1.00 | 8  | 0  | 0  | 6  | 0  | 0  |
| IPI00124284.3 | Q923G2   | Polr2h   | DNA-directed RNA polymerases I, II, and III subunit RPABC3                        |   | X |   |      | 0 | 150  | 0  | 27 | 0  | 1.00 | 1.00 | 1.00 | 0  | 2  | 0  | 0  | 2  | 0  |
| IPI00169797.1 | Q8K205   | Pop1     | Processing of 1, ribonuclease P/MRP family                                        | X |   |   |      | 2 | 1045 | 4  | 0  | 0  | 0.99 | 1.00 | 1.00 | 2  | 0  | 0  | 2  | 0  | 0  |
| IPI00117218.3 | P20263   | Pou5f1   | POU domain, class 5, transcription factor 1                                       |   |   | X |      | 0 | 352  | 0  | 0  | 13 | 1.00 | 1.00 | 1.00 | 0  | 0  | 4  | 0  | 0  | 4  |
| IPI00110684.1 | Q9D819   | Ppa1     | Inorganic pyrophosphatase                                                         | X | X | X |      | 0 | 289  | 39 | 28 | 18 | 1.00 | 1.00 | 1.00 | 10 | 5  | 5  | 9  | 5  | 5  |
| IPI00127050.1 | Q91VM9   | Ppa2     | Isoform 1 of Inorganic pyrophosphatase 2, mitochondrial                           | X |   |   | 2DLC | 0 | 330  | 13 | 0  | 0  | 1.00 | 1.00 | 1.00 | 3  | 0  | 0  | 3  | 0  | 0  |
| IPI00130510.1 | Q91YU8   | Ppan     | Suppressor of SWI4 1 homolog                                                      | X |   | X |      | 0 | 470  | 16 | 0  | 7  | 1.00 | 1.00 | 1.00 | 5  | 0  | 4  | 5  | 0  | 2  |
| IPI00896602.1 | B2RXQ2   | Ppfia1   | Ppfia1 protein                                                                    | X |   |   |      | 2 | 1266 | 4  | 0  | 0  | 1.00 | 1.00 | 1.00 | 3  | 0  | 0  | 3  | 0  | 0  |
| IPI00554989.3 | Q9CZK9   | Ppia     | Peptidyl-prolyl cis-trans isomerase                                               | X | X | X |      | 0 | 167  | 40 | 52 | 47 | 1.00 | 1.00 | 1.00 | 13 | 12 | 7  | 9  | 9  | 6  |
| IPI00135686.2 | P24369   | Ppib     | Peptidyl-prolyl cis-trans isomerase B                                             | X | X | X |      | 0 | 216  | 45 | 19 | 11 | 1.00 | 1.00 | 1.00 | 11 | 3  | 2  | 11 | 3  | 2  |
| IPI00130240.1 | P30412   | Ppic     | Peptidyl-prolyl cis-trans isomerase C                                             | X |   |   |      | 0 | 212  | 17 | 0  | 0  | 1.00 | 1.00 | 1.00 | 4  | 0  | 0  | 4  | 0  | 0  |
| IPI00132966.3 | Q9CR16   | Ppid     | 40 kDa peptidyl-prolyl cis-trans isomerase                                        | X | X | X |      | 0 | 370  | 42 | 27 | 12 | 1.00 | 1.00 | 1.00 | 15 | 9  | 4  | 12 | 9  | 4  |
| IPI00111343.1 | Q9QZH3   | Ppie     | Peptidyl-prolyl cis-trans isomerase E                                             | X |   |   |      | 0 | 301  | 27 | 0  | 0  | 1.00 | 1.00 | 1.00 | 4  | 0  | 0  | 4  | 0  | 0  |
| IPI00457532.2 | Q9D6L8   | Ppil3    | Isoform 1 of Peptidyl-prolyl cis-trans isomerase-like 3                           | X |   |   | 2DLC | 0 | 161  | 12 | 0  | 0  | 1.00 | 1.00 | 1.00 | 2  | 0  | 0  | 2  | 0  | 0  |
| IPI00130185.1 | P62137   | Ppp1ca   | Serine/threonine-protein phosphatase PP1-alpha catalytic subunit                  | X | X | X |      | 0 | 330  | 14 | 16 | 26 | 1.00 | 1.00 | 1.00 | 3  | 4  | 6  | 3  | 4  | 6  |
| IPI00330483.1 | Q80W00   | Ppp1r10  | Serine/threonine-protein phosphatase 1 regulatory subunit 10                      | X |   |   |      | 0 | 888  | 6  | 0  | 0  | 1.00 | 1.00 | 1.00 | 4  | 0  | 0  | 4  | 0  | 0  |
| IPI00623545.2 | Q62084   | Ppp1r14b | Protein phosphatase 1 regulatory subunit 14B                                      | X |   |   |      | 0 | 147  | 26 | 0  | 0  | 1.00 | 1.00 | 1.00 | 3  | 0  | 0  | 3  | 0  | 0  |
| IPI00112721.1 | Q9ERT9   | Ppp1r1a  | Protein phosphatase 1 regulatory subunit 1A                                       | X |   |   |      | 0 | 171  | 28 | 0  | 0  | 1.00 | 1.00 | 1.00 | 4  | 0  | 0  | 3  | 0  | 0  |
| IPI00129319.3 | Q3UM45   | Ppp1r7   | Protein phosphatase 1 regulatory subunit 7                                        | X |   | X |      | 0 | 361  | 43 | 0  | 10 | 1.00 | 1.00 | 1.00 | 12 | 0  | 3  | 10 | 0  | 3  |
| IPI00153750.1 | Q8R3G1   | Ppp1r8   | Nuclear inhibitor of protein phosphatase 1                                        | X |   |   |      | 0 | 351  | 34 | 0  | 0  | 1.00 | 1.00 | 1.00 | 9  | 0  | 0  | 9  | 0  | 0  |
| IPI00120374.1 | P63330   | Ppp2ca   | Serine/threonine-protein phosphatase 2A catalytic subunit                         | X |   |   |      | 0 | 309  | 10 | 0  | 0  | 0.93 | 1.00 | 1.00 | 2  | 0  | 0  | 2  | 0  | 0  |
| IPI00310091.8 | Q76MZ3   | Ppp2r1a  | Serine/threonine-protein phosphatase 2A 65 kDa regulatory subunit A alpha isoform |   | X | X |      | 0 | 589  | 0  | 20 | 15 | 1.00 | 1.00 | 1.00 | 0  | 8  | 6  | 0  | 8  | 6  |
| IPI00222306.5 | Q8BIX1   | Ppp2r1b  | Putative uncharacterized protein                                                  |   | X | X |      | 0 | 694  | 0  | 6  | 10 | 1.00 | 1.00 | 1.00 | 0  | 3  | 4  | 0  | 3  | 4  |

|               |          |         |                                                                                   |   |   |      |      |      |     |    |      |      |      |      |      |    |    |    |    |    |   |
|---------------|----------|---------|-----------------------------------------------------------------------------------|---|---|------|------|------|-----|----|------|------|------|------|------|----|----|----|----|----|---|
| IPI00880817.1 | Q925E7   | Ppp2r2d | Serine/threonine-protein phosphatase 2A 55 kDa regulatory subunit B delta isoform | X |   | 0    | 457  | 5    | 0   | 0  | 1.00 |      | 2    | 0    | 0    | 2  | 0  | 0  |    |    |   |
| IPI00118723.3 | P58389   | Ppp2r4  | Serine/threonine-protein phosphatase 2A regulatory subunit B'                     |   | X | 1    | 323  | 0    | 0   | 22 |      | 1.00 | 0    | 0    | 4    | 0  | 0  | 4  |    |    |   |
| IPI00756703.1 | P63328-2 | Ppp3ca  | Serine/threonine-protein phosphatase 2B catalytic subunit alpha                   |   | X | 1    | 511  | 0    | 0   | 4  |      | 0.99 | 0    | 0    | 2    | 0  | 0  | 2  |    |    |   |
| IPI00109415.1 | P97470   | Ppp4c   | Serine/threonine-protein phosphatase 4 catalytic subunit                          |   | X | 2    | 307  | 0    | 0   | 8  |      | 0.95 | 0    | 0    | 2    | 0  | 0  | 2  |    |    |   |
| IPI00457950.2 | Q91VJ5   | Pqbp1   | Polyglutamine-binding protein 1                                                   | X |   | 0    | 263  | 26   | 0   | 0  | 1.00 |      | 5    | 0    | 0    | 5  | 0  | 0  |    |    |   |
| IPI00121788.1 | P35700   | Prdx1   | Peroxiredoxin-1                                                                   | X | X | X    | 1    | 199  | 34  | 73 | 87   | 1.00 | 1.00 | 1.00 | 11   | 14 | 18 | 10 | 13 | 18 |   |
| IPI00117910.3 | Q61171   | Prdx2   | Peroxiredoxin-2                                                                   | X | X | X    | 1    | 198  | 21  | 56 | 37   | 1.00 | 1.00 | 1.00 | 5    | 8  | 7  | 5  | 8  | 7  |   |
| IPI00116192.1 | P20108   | Prdx3   | Thioredoxin-dependent peroxide reductase, mitochondrial                           |   | X | 2    | 257  | 0    | 10  | 0  |      | 1.00 |      | 0    | 2    | 0  | 0  | 2  | 0  |    |   |
| IPI00555059.2 | O08709   | Prdx6   | Peroxiredoxin-6                                                                   | X | X | 0    | 224  | 0    | 46  | 18 |      | 1.00 | 1.00 | 0    | 8    | 4  | 0  | 8  | 4  |    |   |
| IPI00132089.2 | Q8C6A3   | Prep    | Prolyl endopeptidase                                                              |   | X | X    | 1    | 731  | 0   | 4  | 8    | 1.00 | 1.00 | 0    | 2    | 5  | 0  | 2  | 5  |    |   |
| IPI00114069.1 | P33610   | Prim2   | DNA primase large subunit                                                         | X |   | 0    | 505  | 12   | 0   | 0  | 1.00 |      | 4    | 0    | 0    | 4  | 0  | 0  |    |    |   |
| IPI00223185.5 | Q9R078   | Prkab1  | 5'-AMP-activated protein kinase subunit beta-1                                    | X |   | 0    | 270  | 27   | 0   | 0  | 1.00 |      | 5    | 0    | 0    | 5  | 0  | 0  |    |    |   |
| IPI00230005.3 | P05132   | Prkaca  | cAMP-dependent protein kinase catalytic subunit alpha                             |   | X | 1    | 351  | 0    | 0   | 11 |      | 0.97 | 0    | 0    | 2    | 0  | 0  | 2  |    |    |   |
| IPI00120495.1 | Q9JIF0   | Prmt1   | Protein arginine N-methyltransferase 1                                            | X | X | 1    | 371  | 0    | 16  | 13 |      | 1.00 | 1.00 | 0    | 5    | 4  | 0  | 5  | 4  |    |   |
| IPI00229845.3 | Q8CIG8   | Prmt5   | Protein arginine N-methyltransferase 5                                            |   | X | X    | 1    | 637  | 0   | 12 | 14   | 1.00 | 1.00 | 0    | 4    | 6  | 0  | 4  | 6  |    |   |
| IPI00654420.1 | Q3UYN1   | Prosc   | Putative uncharacterized protein                                                  | X | X | 0    | 326  | 9    | 0   | 14 | 1.00 |      | 0.99 | 2    | 0    | 3  | 2  | 0  | 3  |    |   |
| IPI00222760.1 | Q99KP6-2 | Prpf19  | Pre-mRNA-processing factor 19                                                     |   | X | 0    | 523  | 0    | 0   | 20 |      | 1.00 | 0    | 0    | 6    | 0  | 0  | 6  |    |    |   |
| IPI00331170.1 | Q922U1   | Prpf3   | U4/U6 small nuclear ribonucleoprotein Prp3                                        | X | X | 0    | 683  | 22   | 0   | 4  | 1.00 |      | 0.99 | 10   | 0    | 2  | 10 | 0  | 2  |    |   |
| IPI00331424.8 | Q8CCF0   | Prpf31  | U4/U6 small nuclear ribonucleoprotein Prp31                                       |   | X | 1    | 499  | 0    | 0   | 6  |      | 1.00 | 0    | 0    | 2    | 0  | 0  | 2  |    |    |   |
| IPI00226155.3 | Q4FK66   | Prpf38a | Isoform 1 of Pre-mRNA-splicing factor 38A                                         | X |   | 2DLC | 0    | 312  | 7   | 0  | 0    | 1.00 |      | 2    | 0    | 0  | 2  | 0  | 0  |    |   |
| IPI00458908.2 | Q9DAW6   | Prpf4   | U4/U6 small nuclear ribonucleoprotein Prp4                                        | X |   | 0    | 521  | 7    | 0   | 0  | 1.00 |      | 3    | 0    | 0    | 3  | 0  | 0  |    |    |   |
| IPI00130409.1 | Q91YR7   | Prpf6   | Pre-mRNA-processing factor 6                                                      | X |   | 0    | 941  | 7    | 0   | 0  | 1.00 |      | 4    | 0    | 0    | 4  | 0  | 0  |    |    |   |
| IPI00850200.1 | A5D6Q4   | Prpf8   | pre-mRNA processing factor 8                                                      |   | X | X    | 4    | 2335 | 0   | 15 | 4    | 1.00 | 1.00 | 0    | 29   | 7  | 0  | 29 | 7  |    |   |
| IPI00153950.1 | Q8R574   | Prpsap2 | Phosphoribosyl pyrophosphate synthetase-associated protein 2                      |   | X | 0    | 369  | 0    | 8   | 0  |      | 1.00 |      | 0    | 2    | 0  | 0  | 2  | 0  |    |   |
| IPI00831675.1 | B2RW88   | Prr19   | Proline rich 19                                                                   |   | X | 0    | 366  | 0    | 0   | 10 |      | 0.94 | 0    | 0    | 2    | 0  | 0  | 2  |    |    |   |
| IPI00130391.1 | Q9Z1R9   | Prss1   | protease, serine, 1                                                               | X | X | 0    | 246  | 18   | 10  | 0  | 1.00 | 1.00 | 4    | 2    | 0    | 4  | 2  | 0  |    |    |   |
| IPI00403650.2 | P07146   | Prss2   | Anionic trypsin-2                                                                 | X |   | 0    | 246  | 12   | 0   | 0  | 0.98 |      | 3    | 0    | 0    | 2  | 0  | 0  |    |    |   |
| IPI00321190.1 | Q61207   | Psap    | Sulfated glycoprotein 1                                                           |   | X | 0    | 557  | 0    | 4   | 0  |      | 1.00 |      | 0    | 2    | 0  | 0  | 2  | 0  |    |   |
| IPI00115257.1 | Q99JF8   | Psp1    | Isoform 1 of PC4 and SFRS1-interacting protein                                    | X | X | X    | 2DLC | 0    | 528 | 18 | 8    | 5    | 1.00 | 1.00 | 1.00 | 10 | 3  | 2  | 8  | 3  | 2 |
| IPI00283862.6 | Q9R1P4   | Psm1    | Proteasome subunit alpha type-1                                                   | X | X | X    | 0    | 263  | 10  | 29 | 11   | 1.00 | 1.00 | 1.00 | 2    | 5  | 3  | 2  | 5  | 3  |   |
| IPI00420745.7 | Q3UJW6   | Psm2    | Proteasome subunit alpha type                                                     | X | X | 1    | 247  | 37   | 34  | 0  | 1.00 | 1.00 | 6    | 5    | 0    | 6  | 5  | 0  |    |    |   |
| IPI00331644.5 | O70435   | Psm3    | Proteasome subunit alpha type-3                                                   |   | X | X    | 0    | 255  | 0   | 20 | 9    | 1.00 | 1.00 | 0    | 5    | 2  | 0  | 5  | 2  |    |   |
| IPI00277001.4 | Q9R1P0   | Psm4    | Proteasome subunit alpha type-4                                                   |   | X | X    | 0    | 261  | 0   | 21 | 21   | 1.00 | 1.00 | 0    | 4    | 3  | 0  | 4  | 3  |    |   |
| IPI00131407.1 | Q9Z2U1   | Psm5    | Proteasome subunit alpha type-5                                                   | X |   | 0    | 241  | 0    | 38  | 0  |      | 1.00 | 0    | 7    | 0    | 0  | 7  | 0  |    |    |   |
| IPI00131845.1 | Q9QUM9   | Psm6    | Proteasome subunit alpha type-6                                                   | X | X | X    | 0    | 246  | 13  | 25 | 10   | 1.00 | 1.00 | 1.00 | 2    | 5  | 2  | 2  | 5  | 2  |   |
| IPI00131406.1 | Q9Z2U0   | Psm7    | Proteasome subunit alpha type-7                                                   | X | X | X    | 0    | 248  | 40  | 29 | 10   | 1.00 | 1.00 | 1.00 | 8    | 5  | 2  | 8  | 5  | 2  |   |
| IPI00113845.1 | O09061   | Psm1    | Proteasome subunit beta type-1                                                    | X | X | 1    | 240  | 0    | 19  | 14 |      | 1.00 | 1.00 | 0    | 4    | 2  | 0  | 4  | 2  |    |   |
| IPI00128945.1 | Q9R1P3   | Psm2    | Proteasome subunit beta type-2                                                    |   | X | 1    | 201  | 0    | 28  | 0  |      | 1.00 |      | 0    | 4    | 0  | 0  | 4  | 0  |    |   |
| IPI00314467.3 | Q9R1P1   | Psm3    | Proteasome subunit beta type-3                                                    |   | X | X    | 0    | 205  | 0   | 24 | 21   | 1.00 | 1.00 | 0    | 4    | 3  | 0  | 4  | 3  |    |   |
| IPI00129512.3 | P99026   | Psm4    | Proteasome subunit beta type-4                                                    |   | X | 1    | 264  | 0    | 0   | 10 |      | 0.93 | 0    | 0    | 3    | 0  | 0  | 3  |    |    |   |
| IPI00317902.3 | O55234   | Psm5    | Proteasome subunit beta type-5                                                    |   | X | X    | 1    | 264  | 0   | 31 | 23   | 1.00 | 1.00 | 0    | 7    | 4  | 0  | 7  | 4  |    |   |
| IPI00119239.2 | Q60692   | Psm6    | Proteasome subunit beta type-6                                                    |   | X | X    | 0    | 238  | 0   | 25 | 29   | 1.00 | 1.00 | 0    | 3    | 4  | 0  | 3  | 4  |    |   |
| IPI00136483.1 | P70195   | Psm7    | Proteasome subunit beta type-7                                                    | X | X | 1    | 277  | 14   | 28  | 0  | 1.00 | 1.00 | 3    | 3    | 0    | 2  | 3  | 0  |    |    |   |

|               |          |         |                                                                  |   |   |   |         |      |      |    |    |      |      |      |      |    |    |    |    |    |    |
|---------------|----------|---------|------------------------------------------------------------------|---|---|---|---------|------|------|----|----|------|------|------|------|----|----|----|----|----|----|
| IPI00133428.3 | P62192   | Psmc1   | 26S protease regulatory subunit 4                                | X | X | X | 0       | 440  | 29   | 18 | 9  | 1.00 | 1.00 | 1.00 | 13   | 5  | 3  | 8  | 5  | 3  |    |
| IPI00270326.1 | Q8BVQ9   | Psmc2   | Putative uncharacterized protein                                 | X |   | X | 0       | 475  | 24   | 0  | 11 | 1.00 |      | 1.00 | 9    | 0  | 4  | 8  | 0  | 4  |    |
| IPI00758064.1 | A2AGN7   | Psmc3   | Proteasome (Prosome, macropain) 26S subunit ATPase 3             | X | X | X | 0       | 400  | 39   | 7  | 9  | 1.00 | 1.00 | 1.00 | 16   | 2  | 3  | 11 | 2  | 3  |    |
| IPI00126349.1 | O35047   | Psmc3ip | Homologous-pairing protein 2 homolog                             | X |   |   | 0       | 217  | 29   | 0  | 0  | 1.00 |      |      | 3    | 0  | 0  | 3  | 0  | 0  |    |
| IPI00828513.1 | Q6ZWN9   | Psmc4   | proteasome 26S ATPase subunit 4                                  |   | X | X | 0       | 418  | 0    | 25 | 20 |      | 1.00 | 1.00 | 0    | 7  | 6  | 0  | 7  | 6  |    |
| IPI00135640.1 | P62196   | Psmc5   | 26S protease regulatory subunit 8                                | X | X | X | 0       | 406  | 16   | 8  | 19 | 1.00 | 1.00 | 1.00 | 4    | 3  | 6  | 4  | 3  | 6  |    |
| IPI00125971.1 | P62334   | Psmc6   | 26S protease regulatory subunit S10B                             | X | X | X | 0       | 389  | 12   | 7  | 18 | 1.00 | 1.00 | 1.00 | 3    | 2  | 6  | 3  | 2  | 6  |    |
| IPI00875405.1 | Q3TXS7   | Psmc1   | 26S proteasome non-ATPase regulatory subunit 1                   |   | X | X | 4       | 1002 | 0    | 15 | 6  |      | 1.00 | 1.00 | 0    | 9  | 4  | 0  | 9  | 4  |    |
| IPI00222515.5 | Q8BG32   | Psmc11  | 26S proteasome non-ATPase regulatory subunit 11                  | X | X | X | 0       | 422  | 17   | 25 | 23 | 1.00 | 1.00 | 1.00 | 5    | 8  | 8  | 5  | 8  | 8  |    |
| IPI00318982.3 | Q9D8W5   | Psmc12  | 26S proteasome non-ATPase regulatory subunit 12                  |   | X | X | 0       | 456  | 0    | 14 | 7  |      | 1.00 | 1.00 | 0    | 4  | 3  | 0  | 4  | 3  |    |
| IPI00126048.2 | Q9VWJ2   | Psmc13  | Isoform 1 of 26S proteasome non-ATPase regulatory subunit 13     |   | X | X | 1DE, UF | 1    | 376  | 0  | 26 | 10   |      | 1.00 | 1.00 | 0  | 8  | 3  | 0  | 8  | 3  |
| IPI00113262.1 | O35593   | Psmc14  | 26S proteasome non-ATPase regulatory subunit 14                  |   | X | X |         | 0    | 310  | 0  | 17 | 15   |      | 1.00 | 1.00 | 0  | 3  | 2  | 0  | 3  | 2  |
| IPI00123494.3 | Q8VDM4   | Psmc2   | 26S proteasome non-ATPase regulatory subunit 2                   |   | X | X |         | 4    | 908  | 0  | 20 | 12   |      | 1.00 | 1.00 | 0  | 11 | 10 | 0  | 11 | 10 |
| IPI00314439.3 | P14685   | Psmc3   | 26S proteasome non-ATPase regulatory subunit 3                   | X |   | X | 1       | 530  | 30   | 0  | 11 | 1.00 |      | 1.00 | 12   | 0  | 5  | 12 | 0  | 5  |    |
| IPI00128564.1 | O35226   | Psmc4   | Isoform Rpn10B of 26S proteasome non-ATPase regulatory subunit 4 | X |   |   | 2DLC    | 0    | 376  | 20 | 0  | 0    | 1.00 |      | 6    | 0  | 0  | 6  | 0  | 0  |    |
| IPI00457661.5 | Q8BJY1   | Psmc5   | 26S proteasome non-ATPase regulatory subunit 5                   |   |   | X |         | 1    | 504  | 0  | 0  | 9    |      | 1.00 | 0    | 0  | 3  | 0  | 0  | 3  |    |
| IPI00319965.3 | Q99J14   | Psmc6   | 26S proteasome non-ATPase regulatory subunit 6                   |   | X | X |         | 1    | 389  | 0  | 10 | 12   |      | 1.00 | 0.99 | 0  | 3  | 3  | 0  | 3  | 3  |
| IPI00114667.1 | P26516   | Psmc7   | 26S proteasome non-ATPase regulatory subunit 7                   |   | X | X |         | 2    | 321  | 0  | 31 | 18   |      | 1.00 | 1.00 | 0  | 6  | 3  | 0  | 6  | 3  |
| IPI00856490.1 | Q9CX56   | Psmc8   | proteasome 26S non-ATPase subunit 8                              |   | X |   |         | 1    | 353  | 0  | 7  | 0    |      | 0.99 |      | 0  | 2  | 0  | 0  | 2  | 0  |
| IPI00124223.3 | P97371   | Psmc1   | Proteasome activator complex subunit 1                           | X |   |   |         | 0    | 249  | 28 | 0  | 0    | 1.00 |      | 5    | 0  | 0  | 5  | 0  | 0  |    |
| IPI00649986.2 | P97372   | Psmc2   | Proteasome activator subunit 2                                   |   |   | X |         | 0    | 252  | 0  | 11 | 0    |      | 0.99 | 0    | 2  | 0  | 0  | 2  | 0  |    |
| IPI00649191.2 | P61290   | Psmc3   | Proteasome (Prosome, macropain) 28 subunit, 3                    | X |   | X |         | 0    | 265  | 10 | 0  | 15   | 1.00 |      | 1.00 | 2  | 0  | 3  | 2  | 0  | 3  |
| IPI00396680.3 | Q5SSW2   | Psmc4   | Isoform 1 of Proteasome activator complex subunit 4              |   | X |   | 1DE     | 5    | 1843 | 0  | 8  | 0    |      | 1.00 |      | 0  | 13 | 0  | 0  | 13 | 0  |
| IPI00321266.5 | Q8R326   | Psmc1   | Isoform 1 of Paraspeckle component 1                             | X |   | X | 2DLC    | 0    | 523  | 37 | 0  | 9    | 1.00 |      | 1.00 | 13 | 0  | 3  | 11 | 0  | 3  |
| IPI00117146.1 | Q99LS3   | Psmc1   | Phosphoserine phosphatase                                        |   | X |   |         | 0    | 225  | 0  | 9  | 0    |      | 0.96 |      | 0  | 2  | 0  | 0  | 2  | 0  |
| IPI00475378.4 | Q92217   | Psmc1   | polypyrimidine tract binding protein 1                           | X | X | X |         | 3    | 555  | 12 | 24 | 30   | 1.00 | 1.00 | 1.00 | 3  | 8  | 7  | 3  | 8  | 7  |
| IPI00338458.2 | Q3UK51   | Psmc1   | Putative uncharacterized protein                                 |   | X | X |         | 1    | 687  | 0  | 4  | 5    |      | 1.00 | 0.99 | 0  | 2  | 3  | 0  | 2  | 3  |
| IPI00225419.1 | P29351-2 | Psmc6   | Tyrosine-protein phosphatase non-receptor type 6                 | X |   |   |         | 1    | 597  | 7  | 0  | 0    | 1.00 |      | 2    | 0  | 0  | 2  | 0  | 0  |    |
| IPI00153702.2 | Q8R2Y8   | Psmc2   | Bcl-2 inhibitor of transcription                                 |   | X |   |         | 0    | 182  | 0  | 35 | 0    |      | 1.00 |      | 0  | 4  | 0  | 0  | 4  | 0  |
| IPI00127174.4 | Q3UEB3-2 | Psmc60  | Poly(U)-binding-splicing factor PUF60                            | X | X | X |         | 2    | 547  | 7  | 14 | 12   | 1.00 | 1.00 | 1.00 | 3  | 4  | 3  | 2  | 4  | 3  |
| IPI00330262.5 | Q80U78   | Psmc1   | Pumilio homolog 1                                                | X |   |   |         | 1    | 1189 | 5  | 0  | 0    | 1.00 |      | 5    | 0  | 0  | 4  | 0  | 0  |    |
| IPI00876148.1 | Q69Z61   | Psmc2a  | Isoform 1 of PWWP domain-containing protein 2A                   | X |   |   | 2DLC    | 0    | 730  | 7  | 0  | 0    | 1.00 |      | 3    | 0  | 0  | 2  | 0  | 0  |    |
| IPI00165881.3 | Q8V136   | Psmc1   | Paxillin                                                         | X |   |   |         | 0    | 591  | 5  | 0  | 0    | 1.00 |      | 3    | 0  | 0  | 2  | 0  | 0  |    |
| IPI00223055.2 | Q3TIN2   | Psmc1   | Putative uncharacterized protein                                 | X | X | X |         | 0    | 775  | 4  | 7  | 8    | 1.00 | 1.00 | 1.00 | 3  | 3  | 5  | 3  | 3  | 5  |
| IPI00114560.5 | P62821   | Psmc1   | Ras-related protein Rab-1A                                       |   | X |   |         | 0    | 205  | 0  | 39 | 0    |      | 1.00 |      | 0  | 6  | 0  | 0  | 6  | 0  |
| IPI00130118.1 | P61027   | Psmc10  | Ras-related protein Rab-10                                       | X | X |   |         | 0    | 200  | 3  | 12 | 0    | 0.00 | 0.97 | 1    | 2  | 0  | 1  | 2  | 0  |    |
| IPI00135869.3 | P46638   | Psmc11b | Ras-related protein Rab-11B                                      |   | X |   |         | 1    | 218  | 0  | 16 | 0    |      | 1.00 |      | 0  | 3  | 0  | 0  | 3  | 0  |

|               |          |           |                                                          |   |     |   |      |    |    |    |      |      |      |   |    |    |   |    |
|---------------|----------|-----------|----------------------------------------------------------|---|-----|---|------|----|----|----|------|------|------|---|----|----|---|----|
| IPI00169485.3 | Q9D620   | Rab11fip1 | RAB11 family interacting protein 1                       | X |     | 0 | 1166 | 8  | 0  | 0  | 1.00 |      | 4    | 0 | 0  | 4  | 0 | 0  |
| IPI00126042.3 | Q91V41   | Rab14     | Ras-related protein Rab-14                               |   | X   | 1 | 215  | 0  | 17 | 0  | 1.00 | 1.00 | 0    | 3 | 0  | 0  | 3 | 0  |
| IPI00116770.1 | P35293   | Rab18     | Ras-related protein Rab-18                               |   | X   | 0 | 206  | 0  | 12 | 0  | 1.00 |      | 0    | 2 | 0  | 0  | 2 | 0  |
| IPI00133706.1 | Q9D1G1   | Rab1b     | Ras-related protein Rab-1B                               |   | X X | 0 | 201  | 0  | 27 | 11 | 1.00 | 1.00 | 0    | 4 | 2  | 0  | 4 | 2  |
| IPI00137227.1 | P53994   | Rab2a     | Ras-related protein Rab-2A                               |   | X   | 0 | 212  | 0  | 42 | 0  | 1.00 |      | 0    | 7 | 0  | 0  | 7 | 0  |
| IPI00130489.1 | Q6PHN9   | Rab35     | Ras-related protein Rab-35                               |   | X   | 0 | 201  | 0  | 16 | 0  | 1.00 |      | 0    | 2 | 0  | 0  | 2 | 0  |
| IPI00116697.1 | P35279   | Rab6      | Ras-related protein Rab-6A                               |   | X   | 0 | 208  | 0  | 17 | 0  | 1.00 |      | 0    | 4 | 0  | 0  | 3 | 0  |
| IPI00408892.2 | P51150   | Rab7      | Ras-related protein Rab-7a                               |   | X X | 0 | 207  | 0  | 45 | 18 | 1.00 | 1.00 | 0    | 7 | 3  | 0  | 7 | 3  |
| IPI00903426.1 | Q91WG2   | Rabep2    | Rab GTPase-binding effector protein 2                    | X |     | 0 | 554  | 8  | 0  | 0  | 1.00 |      | 3    | 0 | 0  | 3  | 0 | 0  |
| IPI00108774.1 | P54728   | Rad23b    | UV excision repair protein RAD23 homolog B               | X |     | 0 | 416  | 21 | 0  | 7  | 1.00 | 1.00 | 6    | 0 | 2  | 5  | 0 | 2  |
| IPI00420855.1 | Q6PFE3   | Rad54b    | DNA repair and recombination protein RAD54B              |   | X   | 1 | 886  | 0  | 0  | 5  |      | 0.94 | 0    | 0 | 4  | 0  | 0 | 3  |
| IPI00225719.3 | Q8C570   | Rae1      | mRNA export factor                                       | X |     | 0 | 368  | 10 | 0  | 0  | 1.00 |      | 2    | 0 | 0  | 2  | 0 | 0  |
| IPI00453820.2 | Q9EP71   | Rai14     | Ankyrin                                                  | X |     | 0 | 979  | 3  | 0  | 0  | 0.99 |      | 2    | 0 | 0  | 2  | 0 | 0  |
| IPI00130147.2 | Q64012   | Raly      | RNA-binding protein Raly                                 | X | X X | 0 | 312  | 21 | 11 | 26 | 1.00 | 1.00 | 1.00 | 7 | 2  | 4  | 5 | 2  |
| IPI00321978.3 | P34022   | Ranbp1    | Ran-specific GTPase-activating protein (Fragment)        | X | X X | 0 | 203  | 31 | 27 | 21 | 1.00 | 1.00 | 1.00 | 4 | 4  | 3  | 4 | 4  |
| IPI00337844.4 | Q9ERU9   | Ranbp2    | E3 SUMO-protein ligase RanBP2                            | X | X   | 1 | 3053 | 2  | 3  | 0  | 0.95 | 1.00 |      | 3 | 4  | 0  | 3 | 4  |
| IPI00467338.4 | P46061   | Rangap1   | Ran GTPase-activating protein 1                          |   | X   | 1 | 589  | 0  | 0  | 11 |      | 1.00 | 0    | 0 | 4  | 0  | 0 | 4  |
| IPI00138406.1 | P62835   | Rap1a     | Ras-related protein Rap-1A                               |   | X   | 0 | 184  | 0  | 21 | 0  |      | 1.00 | 0    | 3 | 0  | 0  | 3 | 0  |
| IPI00315488.1 | Q9D0I9   | Rars      | Arginyl-tRNA synthetase, cytoplasmic                     |   | X X | 1 | 660  | 0  | 24 | 12 |      | 1.00 | 1.00 | 0 | 12 | 5  | 0 | 12 |
| IPI00816935.4 | Q60790   | Rasa3     | RAS p21 protein activator 3                              |   | X   | 2 | 834  | 0  | 0  | 5  |      | 0.97 | 0    | 0 | 2  | 0  | 0 | 2  |
| IPI00126133.1 | Q61820   | Ras12-9   | GTP-binding nuclear protein Ran, testis-specific isoform | X |     | 0 | 216  | 12 | 0  | 0  | 0.98 |      | 2    | 0 | 0  | 2  | 0 | 0  |
| IPI00719915.1 | Q9CW46   | Raver1    | Isoform 1 of Ribonucleoprotein PTB-binding 1             | X | X   | 0 | 748  | 27 | 0  | 15 | 1.00 | 1.00 | 10   | 0 | 5  | 10 | 0 | 5  |
| IPI00122696.5 | Q60972   | Rbbp4     | Histone-binding protein RBBP4                            | X | X X | 0 | 425  | 7  | 11 | 22 | 1.00 | 1.00 | 1.00 | 3 | 3  | 7  | 3 | 7  |
| IPI00226384.2 | Q3U3G1   | Rbbp5     | retinoblastoma binding protein 5                         |   | X   | 1 | 538  | 0  | 0  | 4  |      | 1.00 | 0    | 0 | 2  | 0  | 0 | 2  |
| IPI00551482.3 | P97868   | Rbbp6     | Retinoblastoma-binding protein 6                         |   | X   | 0 | 1790 | 0  | 0  | 4  |      | 0.99 | 0    | 0 | 3  | 0  | 0 | 3  |
| IPI00122698.1 | Q60973   | Rbbp7     | Histone-binding protein RBBP7                            | X | X X | 0 | 425  | 7  | 24 | 22 | 1.00 | 1.00 | 1.00 | 3 | 6  | 7  | 3 | 6  |
| IPI00116031.3 | Q99KG3   | Rbm10     | RNA-binding protein 10                                   | X | X   | 1 | 930  | 11 | 2  | 0  | 1.00 | 0.97 |      | 7 | 2  | 0  | 7 | 2  |
| IPI00404707.1 | Q8C2Q3   | Rbm14     | RNA-binding protein 14                                   |   | X   | 0 | 669  | 0  | 6  | 0  |      | 0.99 |      | 0 | 4  | 0  | 0 | 4  |
| IPI00889281.1 | B0LM42   | Rbm14     | Transcriptional coactivator CoAZ                         | X |     | 1 | 336  | 11 | 0  | 0  | 0.96 |      | 2    | 0 | 0  | 2  | 0 | 0  |
| IPI00340815.3 | Q0VBL3   | Rbm15     | RNA binding motif protein 15                             | X | X   | 0 | 962  | 8  | 3  | 0  | 1.00 | 0.99 |      | 4 | 2  | 0  | 4 | 2  |
| IPI00170394.1 | Q8JZX4   | Rbm17     | Splicing factor 45                                       | X |     | 0 | 405  | 10 | 0  | 0  | 1.00 |      | 3    | 0 | 0  | 3  | 0 | 0  |
| IPI00421119.5 | B2RY56   | Rbm25     | Isoform 1 of RNA-binding protein 25                      | X | X X | 0 | 841  | 4  | 8  | 2  | 1.00 | 1.00 | 1.00 | 2 | 6  | 2  | 2 | 6  |
| IPI00828892.1 | Q5SFM8   | Rbm27     | Isoform 1 or 2 of RNA-binding protein 27                 | X |     | 0 | 1060 | 7  | 0  | 0  | 1.00 |      | 6    | 0 | 0  | 5  | 0 | 0  |
| IPI00378187.2 | Q8BG13   | Rbm3      | Rbm3 protein                                             | X |     | 0 | 154  | 32 | 0  | 0  | 1.00 |      | 3    | 0 | 0  | 2  | 0 | 0  |
| IPI00136573.1 | Q9D3U4   | Rbm31y    | MCG53108                                                 | X |     | 0 | 565  | 5  | 0  | 0  | 0.95 |      | 4    | 0 | 0  | 4  | 0 | 0  |
| IPI00225915.2 | B2RUP0   | Rbm34     | RNA binding motif protein 34                             | X |     | 0 | 442  | 14 | 0  | 0  | 1.00 |      | 3    | 0 | 0  | 3  | 0 | 0  |
| IPI00223371.2 | Q5RJ0    | Rbm39     | RNA binding motif protein 39                             | X | X   | 2 | 530  | 22 | 0  | 8  | 1.00 | 1.00 | 7    | 0 | 3  | 7  | 0 | 3  |
| IPI00130160.3 | Q91YE7   | Rbm5      | RNA-binding protein 5                                    | X |     | 0 | 815  | 5  | 0  | 0  | 1.00 |      | 3    | 0 | 0  | 3  | 0 | 0  |
| IPI00279153.3 | Q8R388   | Rbm6      | Rbm6 protein                                             | X |     | 0 | 1122 | 5  | 0  | 0  | 1.00 |      | 3    | 0 | 0  | 3  | 0 | 0  |
| IPI00410937.1 | Q9CWZ3-1 | Rbm8a     | RNA binding motif protein 8a                             | X |     | 0 | 174  | 31 | 0  | 0  | 1.00 |      | 3    | 0 | 0  | 3  | 0 | 0  |
| IPI00223425.2 | Q8BPF71  | Rbm9      | RNA-binding protein 9                                    | X |     | 0 | 449  | 14 | 0  | 0  | 1.00 |      | 4    | 0 | 0  | 3  | 0 | 0  |
| IPI00118523.1 | Q9DAE2   | Rbmx12    | Putative uncharacterized protein                         | X | X   | 0 | 385  | 25 | 15 | 0  | 1.00 | 1.00 | 10   | 5 | 0  | 10 | 5 | 0  |
| IPI00663587.1 | Q91VM5   | Rbmxrt    | RNA binding motif protein, X chromosome retrogene        | X | X X | 0 | 388  | 24 | 5  | 5  | 1.00 | 0.97 | 1.00 | 9 | 2  | 4  | 9 | 2  |
| IPI00130885.1 | Q35479   | Rbmxrt    | Heterogeneous nuclear ribonucleoprotein G                | X | X   | 0 | 388  | 27 | 11 | 0  | 1.00 | 1.00 | 11   | 6 | 0  | 10 | 5 | 0  |
| IPI00464101.2 | Q4VGL6   | Rc3h1     | Roquin                                                   | X |     | 0 | 1130 | 2  | 0  | 0  | 0.99 |      | 2    | 0 | 0  | 2  | 0 | 0  |
| IPI00123762.2 | Q6PFB2   | Rcc1      | Regulator of chromosome condensation 1                   |   | X X | 0 | 434  | 0  | 12 | 15 |      | 1.00 | 1.00 | 0 | 4  | 3  | 0 | 4  |
| IPI00222509.1 | Q8BK67   | Rcc2      | Protein RCC2                                             | X | X X | 0 | 520  | 8  | 32 | 10 | 0.99 | 1.00 | 1.00 | 2 | 12 | 4  | 2 | 12 |
| IPI00137831.1 | Q05186   | Rcn1      | Reticulocalbin-1                                         | X |     | 0 | 325  | 46 | 0  | 0  | 1.00 |      | 8    | 0 | 0  | 8  | 0 | 0  |

|               |         |         |                                                                          |   |   |           |      |      |    |    |      |      |      |      |    |    |    |    |
|---------------|---------|---------|--------------------------------------------------------------------------|---|---|-----------|------|------|----|----|------|------|------|------|----|----|----|----|
| IPI00474959.2 | Q3TE95  | Rcn2    | Putative uncharacterized protein                                         | X |   | 0         | 355  | 8    | 0  | 0  | 1.00 |      | 2    | 0    | 0  | 2  | 0  | 0  |
| IPI00221798.1 | Q8BH97  | Rcn3    | Reticulocalbin-3                                                         | X |   | 0         | 328  | 19   | 0  | 0  | 1.00 |      | 6    | 0    | 0  | 5  | 0  | 0  |
| IPI00226581.1 | Q8C796  | Rcor2   | REST corepressor 2                                                       | X |   | 0         | 523  | 10   | 0  | 0  | 1.00 |      | 4    | 0    | 0  | 4  | 0  | 0  |
| IPI00395067.1 | P19426  | Rdbp    | Negative elongation factor E                                             | X |   | 0         | 375  | 34   | 0  | 0  | 1.00 |      | 12   | 0    | 0  | 8  | 0  | 0  |
| IPI00653921.2 | Q3TS85  | Rdx     | Isoform a of radixin                                                     | X | X | 2DLC, 1DE | 0    | 583  | 14 | 17 | 0    | 1.00 | 1.00 | 7    | 9  | 0  | 6  | 9  |
| IPI00311103.1 | Q9JJW6  | Refbp2  | Isoform 1 of RNA and export factor-binding protein 2                     | X | X | 2DLC      | 0    | 218  | 33 | 12 | 0    | 1.00 | 1.00 | 7    | 2  | 0  | 7  | 2  |
| IPI00120529.2 | Q5U4B1  | Rfc1    | Rfc1 protein                                                             | X |   | 0         | 1132 | 8    | 0  | 0  | 1.00 |      | 5    | 0    | 0  | 5  | 0  | 0  |
| IPI00665571.2 | Q8R323  | Rfc3    | Replication factor C subunit 3                                           |   |   | X         | 0    | 356  | 0  | 0  | 10   |      | 1.00 | 0    | 0  | 3  | 0  | 3  |
| IPI00224572.4 | Q5CZW9  | Rg9mtd2 | RNA (guanine-9-) methyltransferase domain containing 2                   | X |   | 0         | 330  | 5    | 0  | 0  | 1.00 |      | 2    | 0    | 0  | 2  | 0  | 0  |
| IPI00315100.1 | Q9QUI0  | Rhoa    | Transforming protein RhoA                                                |   | X |           | 0    | 193  | 0  | 23 | 0    |      | 1.00 | 0    | 3  | 0  | 0  | 3  |
| IPI00626173.3 | Q6PR54  | Rif1    | Telomere-associated protein RIF1                                         |   | X | X         | 6    | 2419 | 0  | 5  | 7    |      | 1.00 | 1.00 | 0  | 7  | 10 | 7  |
| IPI00471148.2 | Q9CQS5  | Riok2   | Serine/threonine-protein kinase RIO2                                     | X |   | 0         | 547  | 5    | 0  | 0  | 1.00 |      | 2    | 0    | 0  | 2  | 0  | 0  |
| IPI00123915.1 | Q9WTV7  | Rlim    | LIM domain interacting RING finger protein                               | X |   | 0         | 600  | 12   | 0  | 0  | 1.00 |      | 3    | 0    | 0  | 3  | 0  | 0  |
| IPI00330736.5 | Q80XJ2  | Rnf168  | ring finger protein 168                                                  | X |   | 0         | 567  | 5    | 0  | 0  | 1.00 |      | 2    | 0    | 0  | 2  | 0  | 0  |
| IPI00133880.2 | Q9CQJ4  | Rnf2    | E3 ubiquitin-protein ligase RING2                                        | X |   | 0         | 336  | 17   | 0  | 0  | 1.00 |      | 4    | 0    | 0  | 4  | 0  | 0  |
| IPI00313296.3 | Q91VI7  | Rnh1    | Ribonuclease inhibitor                                                   |   | X |           | 0    | 456  | 0  | 0  | 13   |      | 1.00 | 0    | 0  | 3  | 0  | 3  |
| IPI00453849.3 | Q9D0L8  | Rnmt    | mRNA cap guanine-N7 methyltransferase                                    | X |   | 0         | 465  | 7    | 0  | 0  | 1.00 |      | 2    | 0    | 0  | 2  | 0  | 0  |
| IPI00130664.5 | O89026  | Robo1   | Roundabout homolog 1                                                     |   | X |           | 2    | 1612 | 0  | 2  | 0    |      | 0.92 | 0    | 2  | 0  | 0  | 2  |
| IPI00109401.1 | Q9D706  | Rpap3   | RNA polymerase II-associated protein 3                                   | X |   | 0         | 660  | 14   | 0  | 0  | 1.00 |      | 8    | 0    | 0  | 7  | 0  | 0  |
| IPI00124511.1 | Q8VEE0  | Rpe     | Ribulose-phosphate 3-epimerase                                           |   | X |           | 0    | 228  | 0  | 0  | 23   |      | 1.00 | 0    | 0  | 2  | 0  | 2  |
| IPI00380313.3 | Q7TND5  | Rpf1    | Ribosome production factor 1                                             | X |   | 0         | 349  | 26   | 0  | 0  | 1.00 |      | 7    | 0    | 0  | 6  | 0  | 0  |
| IPI00121159.3 | Q9J80   | rpf2    | Brix domain-containing protein 1                                         | X |   | 0         | 306  | 38   | 0  | 0  | 1.00 |      | 16   | 0    | 0  | 10 | 0  | 0  |
| IPI00626239.3 | Q9CXW4  | Rpl11   | Ribosomal protein L11                                                    | X | X | X         | 1    | 181  | 29 | 52 | 35   | 1.00 | 1.00 | 1.00 | 4  | 9  | 6  | 4  |
| IPI00223217.6 | P19253  | Rpl13a  | 60S ribosomal protein L13a                                               | X | X | X         | 0    | 203  | 29 | 13 | 34   | 1.00 | 1.00 | 1.00 | 6  | 3  | 8  | 6  |
| IPI00473728.1 | Q9CWK0  | Rpl14   | Putative uncharacterized protein                                         | X | X | X         | 1    | 227  | 19 | 23 | 22   | 1.00 | 1.00 | 1.00 | 5  | 6  | 5  | 6  |
| IPI00890140.1 | Q569Z0  | Rpl14   | Ribosomal protein L14                                                    | X |   | 1         | 216  | 23   | 0  | 0  | 0.99 |      | 5    | 0    | 0  | 5  | 0  | 0  |
| IPI00555113.2 | P35980  | Rpl18   | 60S ribosomal protein L18                                                | X | X | X         | 0    | 188  | 41 | 41 | 30   | 1.00 | 1.00 | 1.00 | 9  | 7  | 5  | 9  |
| IPI00850221.1 | Rpl19   |         | Mus musculus ribosomal protein L19                                       | X | X | X         | 0    | 196  | 34 | 17 | 22   | 1.00 | 1.00 | 1.00 | 9  | 3  | 4  | 7  |
| IPI00139780.1 | P62830  | Rpl23   | 60S ribosomal protein L23                                                | X | X | X         | 0    | 140  | 51 | 59 | 39   | 1.00 | 1.00 | 1.00 | 11 | 8  | 5  | 8  |
| IPI00876172.1 | P62751  | Rpl23a  | 60S ribosomal protein L23a                                               | X |   | 0         | 153  | 39   | 0  | 0  | 1.00 |      | 8    | 0    | 0  | 8  | 0  | 0  |
| IPI00323806.4 | Q3UJW40 | Rpl24   | Putative uncharacterized protein                                         | X | X | X         | 0    | 160  | 24 | 19 | 30   | 1.00 | 1.00 | 1.00 | 6  | 4  | 5  | 5  |
| IPI00230623.8 | P62911  | Rpl32   | 60S ribosomal protein L32                                                | X | X | X         | 0    | 135  | 40 | 17 | 21   | 1.00 | 1.00 | 1.00 | 6  | 3  | 4  | 5  |
| IPI00222550.8 | Q3U8M3  | Rpl37a  | Putative uncharacterized protein                                         |   | X |           | 0    | 97   | 0  | 0  | 27   |      | 1.00 | 0    | 0  | 2  | 0  | 2  |
| IPI00111412.3 | Q9D8E6  | Rpl4    | 60S ribosomal protein L4                                                 | X | X | X         | 0    | 419  | 37 | 35 | 40   | 1.00 | 1.00 | 1.00 | 24 | 16 | 17 | 20 |
| IPI00311236.1 | P14148  | Rpl7    | 60S ribosomal protein L7                                                 | X | X | X         | 0    | 270  | 53 | 47 | 39   | 1.00 | 1.00 | 1.00 | 20 | 19 | 12 | 19 |
| IPI00111695.1 | Q9D8M4  | Rpl711  | 60S ribosomal protein L7-like 1                                          | X |   | 0         | 246  | 19   | 0  | 0  | 1.00 |      | 5    | 0    | 0  | 5  | 0  | 0  |
| IPI00137787.3 | P62918  | Rpl8    | 60S ribosomal protein L8                                                 | X | X | X         | 0    | 257  | 33 | 31 | 34   | 1.00 | 1.00 | 1.00 | 8  | 8  | 7  | 8  |
| IPI00113377.1 | P47955  | Rplp1   | 60S acidic ribosomal protein P1                                          |   | X | X         | 1    | 114  | 0  | 52 | 52   |      | 1.00 | 1.00 | 0  | 2  | 2  | 0  |
| IPI00139795.2 | P99027  | Rplp2   | 60S acidic ribosomal protein P2                                          | X | X | X         | 0    | 115  | 90 | 70 | 74   | 1.00 | 1.00 | 1.00 | 13 | 4  | 5  | 11 |
| IPI00309035.2 | Q91YQ5  | Rpn1    | Dolichyl-diphosphooligosaccharide--protein glycosyltransferase subunit 1 |   | X | X         | 1    | 608  | 0  | 39 | 14   |      | 1.00 | 1.00 | 0  | 16 | 7  | 0  |
| IPI00889811.1 | Q9DBG6  | Rpn2    | Dolichyl-diphosphooligosaccharide--protein glycosyltransferase subunit 2 |   | X | X         | 5    | 675  | 0  | 27 | 19   |      | 1.00 | 1.00 | 0  | 10 | 6  | 0  |
| IPI00128066.1 | Q91WE3  | Rpp25   | Ribonuclease P protein subunit p25                                       | X |   | 0         | 199  | 35   | 0  | 0  | 1.00 |      | 3    | 0    | 0  | 3  | 0  | 0  |
| IPI00134346.1 | O88796  | Rpp30   | Ribonuclease P protein subunit p30                                       | X |   | 1         | 268  | 26   | 0  | 0  | 1.00 |      | 4    | 0    | 0  | 4  | 0  | 0  |
| IPI00330367.5 | Q80UU2  | Rpp38   | Ribonuclease P protein subunit p38                                       | X |   | 0         | 280  | 21   | 0  | 0  | 1.00 |      | 3    | 0    | 0  | 3  | 0  | 0  |
| IPI00123724.1 | Q8VDS4  | Rprd1a  | Regulation of nuclear pre-mRNA domain-containing protein 1A              | X |   | 0         | 312  | 17   | 0  | 0  | 1.00 |      | 4    | 0    | 0  | 4  | 0  | 0  |
| IPI00338515.4 | Q9CSU0  | Rprd1b  | Isoform 1 of Regulation of nuclear pre-mRNA domain-containing protein 1B | X |   | 2DLC      | 0    | 326  | 33 | 0  | 0    | 1.00 |      | 7    | 0  | 0  | 7  | 0  |
| IPI00112448.1 | P63325  | Rps10   | 40S ribosomal protein S10                                                | X | X | X         | 0    | 165  | 62 | 37 | 28   | 1.00 | 1.00 | 1.00 | 13 | 6  | 4  | 12 |
| IPI00117569.3 | Q9DB79  | Rps11   | Putative uncharacterized protein                                         | X | X | X         | 0    | 166  | 22 | 32 | 51   | 1.00 | 1.00 | 1.00 | 6  | 7  | 10 | 6  |
| IPI00322562.5 | P62264  | Rps14   | 40S ribosomal protein S14                                                | X | X | X         | 0    | 151  | 38 | 24 | 23   | 1.00 | 1.00 | 1.00 | 7  | 4  | 3  | 6  |

|               |        |         |                                                            |   |   |      |   |      |    |    |    |      |      |      |    |    |    |    |    |    |
|---------------|--------|---------|------------------------------------------------------------|---|---|------|---|------|----|----|----|------|------|------|----|----|----|----|----|----|
| IPI00319231.4 | P62843 | Rps15   | 40S ribosomal protein S15                                  | X | X | X    | 0 | 145  | 70 | 43 | 56 | 1.00 | 1.00 | 1.00 | 17 | 6  | 4  | 8  | 3  | 4  |
| IPI00465880.4 | P63276 | Rps17   | 40S ribosomal protein S17                                  | X | X |      | 0 | 135  | 44 | 57 | 0  | 1.00 | 1.00 |      | 7  | 10 | 0  | 6  | 8  | 0  |
| IPI00317590.5 | P62270 | Rps18   | 40S ribosomal protein S18                                  | X |   | X    | 0 | 152  | 52 | 0  | 53 | 1.00 |      | 1.00 | 10 | 0  | 10 | 9  | 0  | 10 |
| IPI00875584.1 | Q9CZX8 | Rps19   | Rps19 protein                                              | X | X | X    | 0 | 157  | 56 | 20 | 45 | 1.00 | 0.98 | 1.00 | 12 | 3  | 7  | 12 | 3  | 7  |
| IPI00323819.3 | P60867 | Rps20   | 40S ribosomal protein S20                                  | X | X | X    | 0 | 119  | 19 | 42 | 25 | 1.00 | 1.00 | 1.00 | 2  | 4  | 3  | 2  | 4  | 3  |
| IPI00132950.1 | Q9CQR2 | Rps21   | 40S ribosomal protein S21                                  | X | X |      | 0 | 83   | 45 | 41 | 0  | 1.00 | 1.00 |      | 5  | 5  | 0  | 4  | 4  | 0  |
| IPI00131357.7 | Q9CZ15 | Rps23   | Putative uncharacterized protein                           | X | X | X    | 0 | 145  | 30 | 48 | 52 | 1.00 | 1.00 | 1.00 | 5  | 6  | 6  | 5  | 6  | 6  |
| IPI00465568.5 | Q9CQK2 | Rps24   | 40S ribosomal protein S24                                  | X | X | X    | 0 | 134  | 38 | 28 | 19 | 1.00 | 1.00 | 1.00 | 8  | 4  | 2  | 6  | 3  | 2  |
| IPI00137735.1 | P62852 | Rps25   | 40S ribosomal protein S25                                  | X | X | X    | 0 | 125  | 31 | 30 | 22 | 1.00 | 1.00 | 1.00 | 5  | 5  | 3  | 5  | 5  | 3  |
| IPI00124709.3 | Q6ZWY3 | Rps271  | 40S ribosomal protein S27-like protein                     | X | X |      | 0 | 84   | 29 | 38 | 0  | 1.00 | 1.00 |      | 3  | 3  | 0  | 2  | 3  | 0  |
| IPI00134599.1 | P62908 | Rps3    | 40S ribosomal protein S3                                   | X | X | X    | 0 | 243  | 64 | 64 | 61 | 1.00 | 1.00 | 1.00 | 19 | 15 | 14 | 17 | 14 | 14 |
| IPI00331092.7 | P62702 | Rps4x   | 40S ribosomal protein S4                                   | X | X | X    | 0 | 263  | 48 | 59 | 65 | 1.00 | 1.00 | 1.00 | 16 | 19 | 21 | 15 | 18 | 20 |
| IPI00471047.2 | Q3V1Z5 | Rps4y2  | RIKEN cDNA 1110033J19                                      | X |   |      | 0 | 262  | 48 | 0  | 0  | 1.00 |      |      | 15 | 0  | 0  | 14 | 0  | 0  |
| IPI00857345.1 | P97461 | Rps5    | 40S ribosomal protein S5                                   | X | X | X    | 0 | 182  | 32 | 41 | 29 | 1.00 | 1.00 | 1.00 | 4  | 7  | 5  | 3  | 7  | 5  |
| IPI00125521.3 | P97461 | Rps5    | 40S ribosomal protein S5                                   | X |   |      | 0 | 204  | 33 | 0  | 0  | 1.00 |      |      | 5  | 0  | 0  | 4  | 0  | 0  |
| IPI00648998.3 | Q505N6 | Rps6ka1 | ribosomal protein S6 kinase polypeptide 1                  | X |   | X    | 2 | 735  | 9  | 0  | 5  | 1.00 |      | 1.00 | 4  | 0  | 3  | 4  | 0  | 3  |
| IPI00136984.1 | P62082 | Rps7    | 40S ribosomal protein S7                                   | X | X | X    | 0 | 194  | 59 | 41 | 55 | 1.00 | 1.00 | 1.00 | 12 | 8  | 8  | 11 | 8  | 8  |
| IPI00420726.3 | Q6ZWN5 | Rps9    | 40S ribosomal protein S9                                   | X | X | X    | 0 | 194  | 49 | 44 | 38 | 1.00 | 1.00 | 1.00 | 17 | 12 | 10 | 16 | 12 | 10 |
| IPI00120035.2 | Q149F1 | Rpusd2  | RNA pseudouridylylase synthase domain-containing protein 2 | X |   |      | 0 | 553  | 12 | 0  | 0  | 1.00 |      |      | 6  | 0  | 0  | 4  | 0  | 0  |
| IPI00123602.2 | Q9JKY0 | Rqcd1   | Cell differentiation protein RCD1 homolog                  |   | X | X    | 2 | 299  | 0  | 7  | 10 |      | 1.00 | 1.00 | 0  | 2  | 2  | 0  | 2  | 2  |
| IPI00121149.1 | Q99PL5 | Rrbp1   | Isoform 3 of Ribosome-binding protein 1                    | X |   | 2DLC | 1 | 1605 | 2  | 0  | 0  | 0.99 |      |      | 2  | 0  | 0  | 2  | 0  | 0  |
| IPI00331302.4 | Q6NZB3 | Rrm1    | Ribonucleoside-diphosphate reductase                       |   | X | X    | 1 | 792  | 0  | 9  | 7  |      | 1.00 | 1.00 | 0  | 4  | 3  | 0  | 4  | 3  |
| IPI00110856.2 | P56183 | Rrp1    | Ribosomal RNA processing protein 1 homolog A               |   |   | X    | 0 | 494  | 0  | 0  | 7  |      | 1.00 | 0    | 0  | 2  | 0  | 0  | 2  | 2  |
| IPI00420344.1 | Q6P5B0 | Rrp12   | RRP12-like protein                                         |   | X | X    | 3 | 1295 | 0  | 5  | 8  |      | 1.00 | 1.00 | 0  | 4  | 7  | 0  | 4  | 7  |
| IPI00133594.3 | Q9D1C9 | Rrp7a   | Ribosomal RNA-processing protein 7 homolog A               | X |   |      | 0 | 280  | 29 | 0  | 0  | 1.00 |      |      | 6  | 0  | 0  | 6  | 0  | 0  |
| IPI00653834.2 | Q9DB85 | Rrp8    | Ribosomal RNA-processing protein 8                         |   |   | X    | 0 | 503  | 0  | 0  | 7  |      | 1.00 | 0    | 0  | 2  | 0  | 0  | 2  | 2  |
| IPI00128256.1 | Q91WM3 | Rrp9    | U3 small nucleolar RNA-interacting protein 2               | X |   | X    | 0 | 475  | 13 | 0  | 11 | 1.00 |      | 1.00 | 4  | 0  | 3  | 4  | 0  | 3  |
| IPI00318725.4 | Q9CYH6 | Rrs1    | Ribosome biogenesis regulatory protein homolog             | X |   |      | 0 | 365  | 33 | 0  | 0  | 1.00 |      |      | 12 | 0  | 0  | 11 | 0  | 0  |
| IPI00226149.6 | Q3UL54 | Rsl1d1  | Putative uncharacterized protein                           | X | X | X    | 0 | 465  | 47 | 15 | 34 | 1.00 | 1.00 | 1.00 | 25 | 5  | 12 | 21 | 5  | 12 |
| IPI00469392.2 | Q99P72 | Rtn4    | Isoform 1 of Reticulon-4                                   |   | X | X    | 2 | 1162 | 0  | 6  | 9  |      | 1.00 | 1.00 | 0  | 3  | 6  | 0  | 3  | 6  |
| IPI00856593.1 | Q3UJN2 | Ruvbl1  | Putative uncharacterized protein                           | X | X | X    | 0 | 456  | 23 | 16 | 23 | 1.00 | 1.00 | 1.00 | 8  | 6  | 7  | 8  | 6  | 7  |
| IPI00123557.3 | Q9WTM5 | Ruvbl2  | RuvB-like 2                                                |   | X |      | 0 | 463  | 0  | 32 | 0  |      | 1.00 |      | 0  | 11 | 0  | 0  | 11 | 0  |
| IPI00121427.1 | P14069 | S100a6  | Protein S100-A6                                            |   |   | X    | 1 | 89   | 0  | 0  | 39 |      | 1.00 | 0    | 0  | 3  | 0  | 0  | 3  | 3  |
| IPI00129105.2 | Q9R1T2 | Sae1    | SUMO-activating enzyme subunit 1                           |   | X | X    | 1 | 350  | 0  | 35 | 8  |      | 1.00 | 1.00 | 0  | 9  | 2  | 0  | 8  | 2  |
| IPI00605227.3 | Q80YR5 | Safb2   | Scaffold attachment factor B2                              | X |   |      | 0 | 1050 | 13 | 0  | 0  | 1.00 |      |      | 7  | 0  | 0  | 7  | 0  | 0  |
| IPI00342267.1 | Q6P5E3 | Sall1   | sal-like 1                                                 |   |   | X    | 0 | 1323 | 0  | 0  | 4  |      | 1.00 | 0    | 0  | 2  | 0  | 0  | 2  | 2  |
| IPI00475164.2 | Q8BX22 | Sall4   | Isoform 1 of Sal-like protein 4                            | X |   | X    | 0 | 1067 | 3  | 0  | 7  | 1.00 |      | 1.00 | 2  | 0  | 5  | 2  | 0  | 5  |
| IPI00875198.1 | Q60710 | Samhd1  | SAM domain- and HD domain-containing protein 1             | X |   |      | 0 | 658  | 13 | 0  | 0  | 1.00 |      |      | 4  | 0  | 0  | 4  | 0  | 0  |
| IPI00225307.1 | Q8C483 | Sars    | Seryl-aminoacyl-tRNA synthetase                            |   |   | X    | 0 | 536  | 0  | 0  | 8  |      | 1.00 | 0    | 0  | 2  | 0  | 0  | 2  | 2  |
| IPI00323674.6 | Q9Z315 | Sart1   | U4/U6.U5 tri-snRNP-associated protein 1                    | X |   |      | 0 | 806  | 24 | 0  | 0  | 1.00 |      |      | 14 | 0  | 0  | 12 | 0  | 0  |
| IPI00136151.4 | P70122 | Sbds    | Ribosome maturation protein SBDS                           | X |   | X    | 0 | 250  | 24 | 0  | 7  | 1.00 |      | 0.99 | 3  | 0  | 2  | 3  | 0  | 2  |
| IPI00407413.2 | B2RPU8 | Scand3  | SCAN domain containing 3                                   |   |   | X    | 2 | 756  | 0  | 3  | 0  |      | 1.00 |      | 0  | 2  | 0  | 0  | 2  | 0  |
| IPI00224219.1 | Q8BRF7 | Scd1    | Sec1 family domain-containing protein 1                    |   |   | X    | 1 | 639  | 0  | 0  | 5  |      |      | 0.99 | 0  | 0  | 2  | 0  | 0  | 2  |
| IPI00121931.1 | Q8VCA8 | Scrn2   | Secernin-2                                                 | X |   |      | 0 | 425  | 10 | 0  | 0  | 0.99 |      |      | 2  | 0  | 0  | 2  | 0  | 0  |

|                |          |          |                                                                          |   |  |      |         |      |   |      |    |    |    |      |      |      |    |    |    |    |    |    |
|----------------|----------|----------|--------------------------------------------------------------------------|---|--|------|---------|------|---|------|----|----|----|------|------|------|----|----|----|----|----|----|
| IPI00462855.3  | Q9EQC5   | Scyl1    | N-terminal kinase-like protein                                           | X |  |      |         |      | 1 | 806  | 7  | 0  | 0  | 1.00 |      | 3    | 0  | 0  | 3  | 0  | 0  |    |
| IPI00659713.1  | Q3TKY6   | Sdccag10 | Peptidyl-prolyl cis-trans isomerase<br>SDCCAG10                          | X |  |      |         |      | 0 | 469  | 25 | 0  | 0  | 1.00 |      | 9    | 0  | 0  | 8  | 0  | 0  |    |
| IPI00123852.6  | Q9DCT5   | Sdf2     | Stromal cell-derived factor 2                                            | X |  |      |         |      | 0 | 211  | 29 | 0  | 0  | 1.00 |      | 5    | 0  | 0  | 4  | 0  | 0  |    |
| IPI00227657.6  | Q9ESP1   | Sdf2l1   | Stromal cell-derived factor 2-like protein 1                             | X |  |      |         |      | 0 | 221  | 30 | 0  | 0  | 1.00 |      | 3    | 0  | 0  | 3  | 0  | 0  |    |
| IPI00117754.1  | Q61112   | Sdf4     | Isoform 1 of 45 kDa calcium-binding protein                              | X |  | 2DLC |         |      | 0 | 361  | 11 | 0  | 0  | 1.00 |      | 2    | 0  | 0  | 2  | 0  | 0  |    |
| IPI00230351.1  | Q8K2B3   | Sdha     | Succinate dehydrogenase [ubiquinone] flavoprotein subunit, mitochondrial | X |  |      |         |      | 1 | 664  | 0  | 33 | 0  | 1.00 |      | 0    | 15 | 0  | 0  | 15 | 0  |    |
| IPI00895251.1  | Q6PET3   | Sec11a   | Sec11a protein (Fragment)                                                | X |  |      |         |      | 2 | 275  | 0  | 6  | 0  | 1.00 |      | 0    | 2  | 0  | 0  | 2  | 0  |    |
| IPI00755905.1  | A2AIX1   | Sec16a   | SEC16 homolog A                                                          | X |  |      |         |      | 1 | 2377 | 4  | 0  | 0  | 1.00 |      | 6    | 0  | 0  | 6  | 0  | 0  |    |
| IPI00123349.2  | Q01405   | Sec23a   | Protein transport protein Sec23A                                         | X |  |      |         |      | 3 | 765  | 0  | 3  | 0  | 0.99 |      | 0    | 2  | 0  | 0  | 2  | 0  |    |
| IPI00377592.7  | Q3UPL0   | Sec31a   | SEC31-like 1                                                             | X |  |      |         |      | 0 | 1324 | 0  | 0  | 3  | 1.00 |      | 0    | 0  | 2  | 0  | 0  | 2  |    |
| IPI00226882.7  | P61620   | Sec61a1  | Protein transport protein Sec61 subunit alpha isoform 1                  | X |  |      |         |      | 8 | 476  | 0  | 18 | 0  | 1.00 |      | 0    | 5  | 0  | 0  | 4  | 0  |    |
| IPI00315517.12 | Q3UP79   | Seh1l    | unnamed protein product                                                  | X |  |      |         |      | 0 | 364  | 10 | 0  | 0  | 0.99 |      | 2    | 0  | 0  | 2  | 0  | 0  |    |
| IPI00377727.8  | Q80TS8   | Sel1l3   | SEL1-like repeat-containing protein KIAA0746                             | X |  |      |         |      | 3 | 1137 | 0  | 0  | 5  | 0.92 |      | 0    | 0  | 3  | 0  | 0  | 3  |    |
| IPI00109326.1  | Q9EP97   | Serp3    | Sentrin-specific protease 3                                              | X |  |      |         |      | 0 | 568  | 22 | 0  | 0  | 1.00 |      | 13   | 0  | 0  | 8  | 0  | 0  |    |
| IPI00309089.6  | P42209   | Sept1    | Septin 1                                                                 | X |  |      |         |      | 0 | 366  | 7  | 0  | 0  | 1.00 |      | 2    | 0  | 0  | 2  | 0  | 0  |    |
| IPI00454142.5  | Q8C1B7   | Sept11   | Septin-11                                                                | X |  | X    |         |      | 0 | 431  | 0  | 10 | 0  | 1.00 |      | 0    | 2  | 0  | 0  | 2  | 0  |    |
| IPI00114945.1  | P42208   | Sept2    | Septin-2                                                                 | X |  | X    | X       |      | 0 | 361  | 26 | 19 | 12 | 1.00 | 1.00 | 1.00 | 5  | 5  | 3  | 5  | 5  | 3  |
| IPI00224626.3  | Q55131   | Sept7    | Cell division cycle 10 homolog                                           | X |  | X    |         |      | 0 | 437  | 15 | 14 | 0  | 1.00 | 1.00 | 4    | 4  | 0  | 4  | 4  | 0  |    |
| IPI00457611.2  | Q80UG5   | Sept9    | Septin-9                                                                 | X |  |      |         |      | 0 | 583  | 22 | 0  | 0  | 1.00 |      | 15   | 0  | 0  | 12 | 0  | 0  |    |
| IPI00471476.1  | Q9CY58-2 | Serp1    | Isoform 2 of Plasminogen activator inhibitor 1 RNA-binding protein       | X |  | X    | X       | 2DLC | 0 | 392  | 29 | 40 | 40 | 1.00 | 1.00 | 1.00 | 9  | 13 | 14 | 9  | 13 | 14 |
| IPI00136642.1  | P32261   | Serpinc1 | Antithrombin-III                                                         | X |  |      |         |      | 1 | 465  | 11 | 0  | 0  | 1.00 |      | 5    | 0  | 0  | 4  | 0  | 0  |    |
| IPI00880252.1  | Q5U4D0   | Serpinh1 | serine (or cysteine) proteinase inhibitor, clade H, member 1 precursor   | X |  | X    |         |      | 1 | 417  | 27 | 0  | 17 | 1.00 | 1.00 | 7    | 0  | 5  | 7  | 0  | 4  |    |
| IPI00886248.1  | Q8CFT2   | Setd1b   | Histone-lysine N-methyltransferase SETD1B                                | X |  |      |         |      | 1 | 1985 | 0  | 0  | 2  | 1.00 | 1.00 | 0    | 0  | 2  | 0  | 0  | 2  |    |
| IPI00116284.4  | Q64213   | Sf1      | Splicing factor 1                                                        | X |  | X    | X       |      | 0 | 653  | 13 | 7  | 10 | 1.00 | 1.00 | 1.00 | 7  | 3  | 4  | 4  | 3  | 4  |
| IPI00408796.3  | Q8K4Z5   | Sf3a1    | Splicing factor 3 subunit 1                                              | X |  | X    | X       |      | 0 | 791  | 0  | 15 | 5  | 1.00 | 1.00 | 0    | 8  | 2  | 0  | 8  | 2  |    |
| IPI00380281.4  | Q62203   | Sf3a2    | splicing factor 3a, subunit 2                                            | X |  |      |         |      | 0 | 485  | 22 | 0  | 0  | 1.00 |      | 11   | 0  | 0  | 5  | 0  | 0  |    |
| IPI00137848.1  | Q9D554   | Sf3a3    | Splicing factor 3A subunit 3                                             | X |  |      |         |      | 0 | 501  | 8  | 0  | 0  | 1.00 |      | 3    | 0  | 0  | 3  | 0  | 0  |    |
| IPI00623284.4  | Q99NB9   | Sf3b1    | Splicing factor 3B subunit 1                                             | X |  | X    | X       |      | 5 | 1304 | 0  | 17 | 11 | 1.00 | 1.00 | 0    | 13 | 10 | 0  | 13 | 10 |    |
| IPI00349401.3  | Q3UA14   | Sf3b2    | Putative uncharacterized protein                                         | X |  | X    |         |      | 0 | 878  | 0  | 5  | 4  | 1.00 | 1.00 | 0    | 4  | 2  | 0  | 4  | 2  |    |
| IPI00122011.2  | Q921M3   | Sf3b3    | Isoform 1 of Splicing factor 3B subunit 3                                | X |  | X    | 1DE, UF |      | 3 | 1217 | 0  | 13 | 9  | 1.00 | 1.00 | 0    | 10 | 8  | 0  | 10 | 8  |    |
| IPI00311948.3  | Q923D4   | Sf3b5    | Splicing factor 3B subunit 5                                             | X |  |      |         |      | 0 | 86   | 0  | 45 | 0  | 1.00 |      | 0    | 3  | 0  | 0  | 3  | 0  |    |
| IPI00454015.2  | Q8CH02   | Sf4      | Splicing factor 4                                                        | X |  |      |         |      | 0 | 643  | 14 | 0  | 0  | 1.00 |      | 6    | 0  | 0  | 6  | 0  | 0  |    |
| IPI00118286.1  | Q70456   | Sfn      | 14-3-3 protein sigma                                                     | X |  | X    | X       |      | 0 | 248  | 4  | 31 | 29 | 0.00 | 1.00 | 1.00 | 2  | 7  | 6  | 1  | 6  | 6  |
| IPI00129430.1  | Q8VIJ6   | Sfpq     | Splicing factor, proline- and glutamine-rich                             | X |  | X    | X       |      | 0 | 699  | 22 | 21 | 19 | 1.00 | 1.00 | 1.00 | 12 | 11 | 9  | 12 | 11 | 9  |
| IPI00848672.1  | Sfrs11   | Sfrs11   | splicing factor, arginine/serine-rich 11                                 | X |  | X    |         |      | 1 | 511  | 10 | 0  | 6  | 1.00 | 1.00 | 3    | 0  | 2  | 3  | 0  | 2  |    |
| IPI00314984.4  | Q3UYX6   | Sfrs13a  | Putative uncharacterized protein                                         | X |  | X    |         |      | 0 | 278  | 14 | 10 | 0  | 1.00 | 1.00 | 3    | 2  | 0  | 3  | 2  | 0  |    |
| IPI00405760.2  | Q8CH09   | Sfrs14   | Putative splicing factor, arginine/serine-rich 14                        | X |  | X    |         |      | 0 | 1067 | 0  | 0  | 3  | 0.92 |      | 0    | 0  | 2  | 0  | 0  | 2  |    |
| IPI00474430.1  | Q8C671   | Sfrs2    | Putative uncharacterized protein                                         | X |  | X    | X       |      | 0 | 254  | 0  | 7  | 6  | 0.99 | 1.00 | 0    | 2  | 2  | 0  | 2  | 2  |    |
| IPI00129323.1  | P84104   | Sfrs3    | Splicing factor, arginine/serine-rich 3                                  | X |  | X    |         |      | 0 | 164  | 14 | 21 | 0  | 1.00 | 1.00 | 2    | 3  | 0  | 2  | 3  | 0  |    |
| IPI00607076.1  | Q542V3   | Sfrs4    | splicing factor, arginine/serine-rich 4                                  | X |  | X    |         |      | 0 | 491  | 5  | 0  | 4  | 0.99 | 0.98 | 2    | 0  | 2  | 2  | 0  | 2  |    |
| IPI00314709.1  | Q35326   | Sfrs5    | Splicing factor, arginine/serine-rich 5                                  | X |  |      |         |      | 0 | 270  | 10 | 0  | 0  | 1.00 |      | 2    | 0  | 0  | 2  | 0  | 0  |    |
| IPI00222763.1  | Q8BL97   | Sfrs7    | Splicing factor, arginine/serine-rich 7                                  | X |  | X    | X       |      | 1 | 267  | 5  | 16 | 10 | 1.00 | 1.00 | 1    | 4  | 3  | 1  | 4  | 3  |    |
| IPI00132340.1  | Q9D0B0   | Sfrs9    | Splicing factor, arginine/serine-rich 9                                  | X |  |      |         |      | 0 | 222  | 25 | 0  | 0  | 1.00 |      | 6    | 0  | 0  | 6  | 0  | 0  |    |
| IPI00115454.3  | Q99JR1   | Sfxn1    | Sideroflexin-1                                                           | X |  | X    |         |      | 3 | 322  | 0  | 0  | 14 | 1.00 |      | 0    | 0  | 2  | 0  | 0  | 2  |    |



|               |        |          |                                                                                               |   |  |   |      |    |      |    |    |    |      |      |      |      |    |    |    |   |
|---------------|--------|----------|-----------------------------------------------------------------------------------------------|---|--|---|------|----|------|----|----|----|------|------|------|------|----|----|----|---|
| IPI00127358.1 | Q91VW3 | Sh3bgrl3 | SH3 domain-binding glutamic acid-rich-like protein 3                                          | X |  |   |      | 0  | 93   | 20 | 0  | 0  | 1.00 |      | 2    | 0    | 0  | 2  | 0  | 0 |
| IPI00312752.3 | Q62419 | Sh3gl1   | Endophilin-A2                                                                                 | X |  |   |      | 0  | 368  | 19 | 0  | 0  | 1.00 |      | 3    | 0    | 0  | 3  | 0  | 0 |
| IPI00849830.1 | Q6PD21 | Shb      | src homology 2 domain-containing transforming protein B                                       | X |  |   |      | 1  | 605  | 5  | 0  | 0  | 1.00 |      | 2    | 0    | 0  | 2  | 0  | 0 |
| IPI00125298.2 | P98083 | Shc1     | SHC-transforming protein 1                                                                    |   |  |   | X    | 0  | 579  | 0  | 0  | 6  |      | 1.00 | 0    | 0    | 3  | 0  | 0  | 3 |
| IPI00608017.1 | Q8R0X9 | Shmt1    | serine hydroxymethyltransferase 1                                                             |   |  | X | X    | 1  | 478  | 0  | 6  | 11 |      | 1.00 | 1.00 | 0    | 3  | 5  | 0  | 3 |
| IPI00454008.1 | Q99K87 | Shmt2    | Serine hydroxymethyltransferase                                                               | X |  | X | X    | 1  | 504  | 17 | 24 | 8  |      | 1.00 | 1.00 | 1.00 | 5  | 8  | 3  | 5 |
| IPI00117932.2 | Q60520 | Sin3a    | Paired amphipathic helix protein Sin3a                                                        | X |  |   |      | 0  | 1282 | 3  | 0  | 0  |      | 1.00 |      | 2    | 0  | 0  | 2  |   |
| IPI00453688.1 | Q8C0T5 | Sipa111  | Signal-induced proliferation-associated 1-like protein 1                                      |   |  |   | X    | 0  | 1782 | 0  | 0  | 5  |      | 1.00 | 0    | 0    | 5  | 0  | 0  | 5 |
| IPI00134988.1 | Q923E4 | Sirt1    | NAD-dependent deacetylase sirtuin-1                                                           |   |  |   | X    | 0  | 737  | 0  | 0  | 9  |      | 1.00 | 0    | 0    | 3  | 0  | 0  | 3 |
| IPI00113134.1 | Q9CZU3 | Skiv2l2  | Superkiller viralicidic activity 2-like 2                                                     |   |  | X |      | 1  | 1040 | 0  | 8  | 0  |      | 1.00 |      | 0    | 5  | 0  | 0  |   |
| IPI00331163.9 | Q9WTX5 | Skp1a    | S-phase kinase-associated protein 1                                                           |   |  | X |      | 0  | 163  | 0  | 22 | 0  |      | 1.00 |      | 0    | 2  | 0  | 0  |   |
| IPI00137194.1 | P53986 | Slc16a1  | Monocarboxylate transporter 1                                                                 |   |  | X |      | 10 | 493  | 0  | 7  | 0  |      | 1.00 |      | 0    | 2  | 0  | 0  |   |
| IPI00230754.5 | Q9CR62 | Slc25a11 | Mitochondrial 2-oxoglutarate/malate carrier protein                                           |   |  | X |      | 3  | 314  | 0  | 6  | 0  |      | 1.00 |      | 0    | 2  | 0  | 0  |   |
| IPI00135651.1 | Q9QXX4 | Slc25a13 | Calcium-binding mitochondrial carrier protein Aralar2                                         |   |  | X | X    | 4  | 676  | 0  | 38 | 6  |      | 1.00 | 1.00 | 0    | 17 | 2  | 0  |   |
| IPI00115564.5 | P48962 | Slc25a4  | ADP/ATP translocase 1                                                                         | X |  | X | X    | 3  | 298  | 9  | 41 | 29 |      | 1.00 | 1.00 | 0.99 | 2  | 12 | 7  |   |
| IPI00127841.3 | P51881 | Slc25a5  | ADP/ATP translocase 2                                                                         | X |  | X | X    | 2  | 298  | 9  | 52 | 32 |      | 1.00 | 1.00 | 1.00 | 2  | 15 | 8  |   |
| IPI00120769.3 | Q9JIM1 | Slc29a1  | Equilibrative nucleoside transporter 1                                                        |   |  |   | X    | 10 | 460  | 0  | 0  | 7  |      | 1.00 |      | 0    | 0  | 3  | 0  |   |
| IPI00884508.1 | Q6GTI3 | Slc2a1   | solute carrier family 2 (facilitated glucose transporter), member 1                           |   |  | X | X    | 10 | 492  | 0  | 11 | 12 |      | 1.00 | 1.00 | 0    | 4  | 4  | 0  |   |
| IPI00134191.3 | P32037 | Slc2a3   | Solute carrier family 2, facilitated glucose transporter member 3                             |   |  | X |      | 10 | 493  | 0  | 9  | 0  |      | 1.00 |      | 0    | 5  | 0  | 0  |   |
| IPI00123279.1 | Q922Q5 | Slc35b3  | Adenosine 3'-phospho 5'-phosphosulfate transporter 2                                          |   |  |   | X    | 9  | 369  | 0  | 0  | 20 |      |      | 0.96 | 0    | 0  | 3  | 0  |   |
| IPI00114641.2 | Q60849 | Slc3a2   | CD98 heavy chain                                                                              |   |  | X | X    | 0  | 532  | 0  | 29 | 11 |      | 1.00 | 1.00 | 0    | 11 | 5  | 0  |   |
| IPI00880321.1 |        | Slc4a1ap | 83 kDa protein                                                                                | X |  |   |      | 0  | 744  | 7  | 0  | 0  | 0.99 |      |      | 4    | 0  | 0  | 4  |   |
| IPI00109311.3 | P70441 | Slc9a3r1 | Isoform 1 of Na(+)/H(+) exchange regulatory cofactor NHE-RF1                                  | X |  |   | 2DLC | 0  | 355  | 15 | 0  | 0  |      | 1.00 |      | 3    | 0  | 0  | 3  |   |
| IPI00331076.4 | O54988 | Slk      | STE20-like serine/threonine-protein kinase                                                    | X |  |   |      | 1  | 1233 | 3  | 0  | 0  | 0.90 |      |      | 2    | 0  | 0  | 2  |   |
| IPI00229571.1 | Q8CH25 | Slm      | SAFB-like transcription modulator                                                             | X |  |   |      | 0  | 1031 | 5  | 0  | 0  |      | 1.00 |      | 3    | 0  | 0  | 3  |   |
| IPI00221882.1 | Q8BHJ9 | Slu7     | Pre-mRNA-splicing factor SLU7                                                                 | X |  |   |      | 0  | 585  | 9  | 0  | 0  |      | 1.00 |      | 3    | 0  | 0  | 3  |   |
| IPI00460668.2 | Q3TUD7 | Smarca4  | Putative uncharacterized protein                                                              |   |  | X |      | 0  | 1617 | 0  | 10 | 0  |      | 1.00 |      | 0    | 10 | 0  | 0  |   |
| IPI00396739.1 | Q91ZW3 | Smarca5  | SWI/SNF-related matrix-associated actin-dependent regulator of chromatin subfamily A member 5 |   |  | X | X    | 0  | 1051 | 0  | 7  | 5  |      | 1.00 | 1.00 | 0    | 9  | 4  | 0  |   |
| IPI00125662.2 | P97496 | Smarcc1  | SWI/SNF complex subunit SMARCC1                                                               | X |  | X | X    | 2  | 1104 | 20 | 9  | 8  |      | 1.00 | 1.00 | 1.00 | 19 | 7  | 6  |   |
| IPI00121270.5 | Q61466 | Smarcd1  | SWI/SNF-related matrix-associated actin-dependent regulator of chromatin subfamily D member 1 | X |  |   |      | 0  | 515  | 20 | 0  | 0  |      | 1.00 |      | 6    | 0  | 0  | 6  |   |
| IPI00119892.1 | O54941 | Smarce1  | SWI/SNF-related matrix-associated actin-dependent regulator chromatin subfamily E member 1    | X |  |   |      | 0  | 411  | 30 | 0  | 0  |      | 1.00 |      | 10   | 0  | 0  | 10 |   |
| IPI00606586.2 | Q3ULS2 | Smc2     | Putative uncharacterized protein                                                              | X |  | X | X    | 1  | 1233 | 3  | 4  | 2  |      | 1.00 | 1.00 | 1.00 | 3  | 3  | 3  |   |
| IPI00132122.3 | Q9CW03 | Smc3     | Structural maintenance of chromosomes protein 3                                               | X |  |   |      | 1  | 1217 | 4  | 0  | 0  | 0.99 |      |      | 3    | 0  | 0  | 3  |   |
| IPI00229397.1 | Q8CG47 | Smc4     | Structural maintenance of chromosomes protein 4                                               | X |  | X |      | 0  | 1286 | 4  | 11 | 0  |      | 1.00 | 1.00 |      | 4  | 12 | 0  |   |
| IPI00129918.1 | P97801 | Smn1     | Survival motor neuron protein                                                                 |   |  |   | X    | 0  | 288  | 0  | 0  | 17 |      |      | 0.99 | 0    | 0  | 2  | 0  |   |
| IPI00221714.1 | Q8BGT7 | Smndc1   | Survival of motor neuron-related-splicing factor 30                                           | X |  |   |      | 0  | 238  | 24 | 0  | 0  |      | 1.00 |      | 3    | 0  | 0  | 3  |   |
| IPI00648499.1 | Q921U8 | Smtn     | Smoothelin                                                                                    | X |  |   |      | 0  | 946  | 2  | 0  | 0  |      | 1.00 |      | 1    | 0  | 0  | 1  |   |



|               |          |         |                                                          |   |   |   |         |   |      |    |    |    |      |      |      |    |    |    |    |    |    |
|---------------|----------|---------|----------------------------------------------------------|---|---|---|---------|---|------|----|----|----|------|------|------|----|----|----|----|----|----|
| IPI00605037.1 | Q52KI8   | Srrm1   | Serine/arginine repetitive matrix protein 1              |   | X | X |         | 0 | 946  | 0  | 3  | 2  |      | 1.00 | 1.00 | 0  | 2  | 2  | 0  | 2  | 2  |
| IPI00785240.1 | Q8BTI8   | Srrm2   | Serine/arginine repetitive matrix protein 2              |   |   |   | X       | 0 | 2703 | 0  | 0  | 2  |      |      | 1.00 | 0  | 0  | 4  | 0  | 0  | 4  |
| IPI00134300.1 | P32067   | Ssb     | Lupus La protein homolog                                 | X | X | X |         | 0 | 415  | 48 | 33 | 8  | 1.00 | 1.00 | 1.00 | 27 | 12 | 3  | 25 | 12 | 3  |
| IPI00110852.4 | Q52PE3   | Ssr1    | Translocon-associated protein alpha                      |   | X |   |         | 1 | 298  | 0  | 6  | 0  |      | 1.00 |      | 0  | 2  | 0  | 0  | 2  | 0  |
| IPI00407571.2 | Q08943-2 | Ssrp1   | FACT complex subunit SSRP1                               |   | X | X |         | 0 | 713  | 0  | 8  | 12 |      | 1.00 | 1.00 | 0  | 4  | 5  | 0  | 4  | 5  |
| IPI00116308.1 | Q99L47   | St13    | Hsc70-interacting protein                                | X | X | X |         | 0 | 371  | 13 | 17 | 6  | 1.00 | 1.00 | 1.00 | 4  | 5  | 2  | 4  | 5  | 2  |
| IPI00468418.2 | O88811   | Stam2   | Signal transducing adapter molecule 2                    | X |   |   |         | 1 | 523  | 9  | 0  | 0  | 0.99 |      |      | 2  | 0  | 0  | 2  | 0  | 0  |
| IPI00749596.1 | A2A5S3   | Stau1   | stau1 (RNA binding protein) homolog 1 isoform 1          | X |   |   | 2DLC    | 0 | 495  | 8  | 0  | 0  | 1.00 |      |      | 3  | 0  | 0  | 3  | 0  | 0  |
| IPI00121514.3 | Q60864   | Stip1   | Stress-induced-phosphoprotein 1                          | X | X | X |         | 0 | 543  | 45 | 21 | 25 | 1.00 | 1.00 | 1.00 | 37 | 10 | 12 | 26 | 10 | 12 |
| IPI00551236.3 | P54227   | Stmn1   | Stathmin                                                 | X | X | X |         | 0 | 149  | 33 | 15 | 29 | 1.00 | 0.96 | 1.00 | 7  | 3  | 4  | 7  | 3  | 4  |
| IPI00115117.1 | Q99JB2   | Stoml2  | Stomatin-like protein 2                                  |   | X | X |         | 0 | 353  | 0  | 18 | 20 |      | 1.00 | 1.00 | 0  | 4  | 4  | 0  | 4  | 4  |
| IPI00130670.1 | Q9Z1Z2   | Strap   | 39 kDa protein                                           | X |   |   |         | 0 | 351  | 32 | 0  | 0  | 1.00 |      |      | 8  | 0  | 0  | 7  | 0  | 0  |
| IPI00554884.1 | Q5BKR9   | Strn    | Striatin, calmodulin binding protein                     | X |   |   |         | 0 | 780  | 4  | 0  | 0  | 1.00 |      |      | 3  | 0  | 0  | 3  | 0  | 0  |
| IPI00471361.3 | Q9WUD1   | Stub1   | STIP1 homology and U box-containing protein 1            | X |   |   |         | 0 | 304  | 14 | 0  | 0  | 1.00 |      |      | 3  | 0  | 0  | 3  | 0  | 0  |
| IPI00406442.2 | Q9WUM5   | Suclg1  | succinate-CoA ligase, GDP-forming, alpha subunit         |   |   | X |         | 0 | 333  | 0  | 0  | 17 |      | 1.00 |      | 0  | 0  | 4  | 0  | 0  | 4  |
| IPI00408957.3 | Q9CX34   | Sugt1   | Suppressor of G2 allele of SKP1 homolog                  | X | X | X |         | 0 | 336  | 35 | 10 | 23 | 1.00 | 1.00 | 1.00 | 10 | 2  | 5  | 10 | 2  | 5  |
| IPI00120344.2 | Q920B9   | Supt16h | FACT complex subunit SPT16                               |   | X | X |         | 1 | 1047 | 0  | 16 | 9  |      | 1.00 | 1.00 | 0  | 12 | 7  | 0  | 12 | 7  |
| IPI00656221.1 | O55201   | Supt5h  | Transcription elongation factor SPT5                     |   |   | X |         | 0 | 1082 | 0  | 0  | 1  |      | 1.00 | 0    | 0  | 2  | 0  | 0  | 2  | 0  |
| IPI00454050.1 | Q62383   | Supt6h  | Transcription elongation factor SPT6                     |   | X | X |         | 0 | 1726 | 0  | 6  | 2  |      | 1.00 | 1.00 | 0  | 8  | 3  | 0  | 8  | 3  |
| IPI00406117.1 | Q7TMK9   | Syncrip | Isoform 1 of Heterogeneous nuclear ribonucleoprotein Q   | X | X | X | 2DLC    | 0 | 623  | 36 | 28 | 16 | 1.00 | 1.00 | 1.00 | 15 | 14 | 9  | 15 | 14 | 9  |
| IPI00403993.5 | Syne1    | Syne1   | Synaptic nuclear envelope 1                              | X |   | X |         | 2 | 8799 | 1  | 0  | 1  | 0.99 |      | 1.00 | 7  | 0  | 8  | 7  | 0  | 8  |
| IPI00845851.1 | Syne2    | Syne2   | Synaptic nuclear envelope 2                              |   |   | X |         | 3 | 6874 | 0  | 0  | 1  |      | 0.97 | 0    | 0  | 4  | 0  | 0  | 4  | 0  |
| IPI00465585.1 | Q9JJG0   | Tacc2   | Transforming, acidic coiled-coil containing protein 2    | X |   |   |         | 0 | 2879 | 2  | 0  | 0  | 1.00 |      |      | 2  | 0  | 0  | 2  | 0  | 0  |
| IPI00757998.1 | Q99LH8   | Tacc3   | Tacc3 protein                                            | X |   |   |         | 0 | 637  | 6  | 0  | 0  | 0.99 |      |      | 2  | 0  | 0  | 2  | 0  | 0  |
| IPI00876056.1 | Taf15    | Taf15   | 62 kDa protein                                           | X |   |   |         | 1 | 589  | 5  | 0  | 0  | 1.00 |      |      | 2  | 0  | 0  | 2  | 0  | 0  |
| IPI00226515.5 | P37804   | Tagln   | Transgelin                                               | X |   | X |         | 0 | 201  | 11 | 0  | 15 | 1.00 |      | 1.00 | 2  | 0  | 3  | 2  | 0  | 3  |
| IPI00125778.3 | Q9VWA4   | Tagln2  | transgelin                                               | X | X | X |         | 0 | 212  | 38 | 24 | 32 | 1.00 | 1.00 | 1.00 | 7  | 3  | 6  | 6  | 3  | 5  |
| IPI00124692.1 | Q93092   | Taldo1  | Transaldolase                                            | X | X | X |         | 2 | 337  | 0  | 27 | 20 |      | 1.00 | 1.00 | 0  | 11 | 7  | 0  | 11 | 7  |
| IPI00121758.1 | Q921F2   | Tardbp  | TAR DNA-binding protein 43                               | X | X | X |         | 1 | 414  | 19 | 25 | 12 | 1.00 | 1.00 | 1.00 | 5  | 7  | 2  | 5  | 7  | 2  |
| IPI00468688.4 | Q9D0R2   | Tars    | Threonyl-tRNA synthetase, cytoplasmic                    | X | X | X |         | 1 | 722  | 3  | 12 | 12 | 1.00 | 1.00 | 1.00 | 2  | 7  | 7  | 2  | 7  | 7  |
| IPI00222972.5 | P48428   | Tbca    | Tubulin-specific chaperone A                             | X |   |   |         | 0 | 108  | 24 | 0  | 0  | 1.00 |      |      | 3  | 0  | 0  | 3  | 0  | 0  |
| IPI00315948.3 | Q9D1E6   | Tbcb    | Tubulin-folding cofactor B                               |   |   | X |         | 1 | 244  | 0  | 0  | 9  |      | 1.00 | 0    | 0  | 2  | 0  | 0  | 2  | 0  |
| IPI00124057.1 | Q8VE90   | Tbl3    | Transducin (beta)-like 3                                 |   |   | X |         | 0 | 802  | 0  | 0  | 5  |      | 1.00 | 0    | 0  | 3  | 0  | 0  | 3  | 0  |
| IPI00121887.5 | P10711   | Tcea1   | Isoform 2 of Transcription elongation factor A protein 1 | X |   |   | 2DLC    | 0 | 301  | 18 | 0  | 0  | 1.00 |      |      | 5  | 0  | 0  | 3  | 0  | 0  |
| IPI00471277.1 | Q8CGF7   | Tcerg1  | Transcription elongation regulator 1                     | X |   |   |         | 0 | 1100 | 3  | 0  | 0  | 0.98 |      |      | 3  | 0  | 0  | 3  | 0  | 0  |
| IPI00830311.1 | P15806   | Tcf3    | transcription factor E2a                                 | X |   |   |         | 0 | 653  | 11 | 0  | 0  | 0.99 |      |      | 3  | 0  | 0  | 3  | 0  | 0  |
| IPI00817019.1 | A1A549   | Tcf711  | transcription factor 3                                   | X |   |   |         | 0 | 599  | 9  | 0  | 0  | 1.00 |      |      | 3  | 0  | 0  | 3  | 0  | 0  |
| IPI00408190.1 | Q7TPZ2   | Tcof1   | Tcof1 protein (Fragment)                                 |   |   | X |         | 1 | 1320 | 0  | 0  | 7  |      | 1.00 | 0    | 0  | 5  | 0  | 0  | 5  | 0  |
| IPI00459493.5 | P11983   | Tcp1    | Isoform 1 of T-complex protein 1 subunit alpha B         |   | X | X | 1DE, UF | 2 | 556  | 0  | 51 | 38 |      | 1.00 | 1.00 | 0  | 23 | 18 | 0  | 22 | 18 |
| IPI00118678.1 | P11984   | Tcp1    | T-complex protein 1 subunit alpha A                      |   |   | X |         | 2 | 556  | 0  | 0  | 35 |      | 0.94 | 0    | 0  | 16 | 0  | 0  | 16 | 0  |
| IPI00331660.5 | Q8K3F7   | Tdh     | L-threonine 3-dehydrogenase, mitochondrial               |   | X | X |         | 0 | 373  | 0  | 30 | 27 |      | 1.00 | 1.00 | 0  | 6  | 6  | 0  | 6  | 6  |
| IPI00875068.1 | Q52L67   | Tecr    | Gpsn2 protein                                            | X |   |   |         | 3 | 362  | 0  | 6  | 0  |      | 1.00 |      | 0  | 2  | 0  | 0  | 2  | 0  |
| IPI00457624.2 | Q8BG87   | Tet3    | hypothetical protein LOC194388                           |   |   | X |         | 1 | 1713 | 0  | 0  | 3  |      | 0.97 | 0    | 0  | 4  | 0  | 0  | 4  | 0  |
| IPI00458057.3 | Q3URQ0   | Tex10   | Tex10 protein                                            |   | X | X |         | 4 | 928  | 0  | 7  | 9  |      | 1.00 | 1.00 | 0  | 4  | 5  | 0  | 4  | 5  |
| IPI00124700.1 | Q62351   | Tfrc    | Transferrin receptor protein 1                           | X |   | X |         | 1 | 763  | 0  | 26 | 0  |      | 1.00 | 0    | 18 | 0  | 0  | 17 | 0  | 0  |
| IPI00114407.2 | O08583   | Thoc4   | THO complex subunit 4                                    | X | X | X |         | 0 | 255  | 49 | 11 | 24 | 1.00 | 1.00 | 1.00 | 15 | 2  | 4  | 12 | 2  | 4  |

|                |          |          |                                                                |  |   |   |      |           |      |     |    |    |      |      |      |    |    |    |    |    |    |
|----------------|----------|----------|----------------------------------------------------------------|--|---|---|------|-----------|------|-----|----|----|------|------|------|----|----|----|----|----|----|
| IPI00322150.8  | Q8C1A5   | Thop1    | Thimet oligopeptidase                                          |  | X | X |      | 0         | 687  | 0   | 7  | 9  | 1.00 | 1.00 | 0    | 4  | 5  | 0  | 4  | 5  |    |
| IPI00556768.1  | Q569Z6   | Thrap3   | Thyroid hormone receptor-associated protein 3                  |  | X | X |      | 0         | 951  | 0   | 5  | 4  | 1.00 | 1.00 | 0    | 3  | 3  | 0  | 3  | 3  |    |
| IPI00467123.2  | Q9R1X4   | Timeless | Protein timeless homolog                                       |  |   | X |      | 3         | 1197 | 0   | 0  | 4  |      | 0.99 | 0    | 0  | 3  | 0  | 0  | 3  |    |
| IPI00134484.1  | P62075   | Timm13   | Mitochondrial import inner membrane translocase subunit Tim13  |  | X |   |      | 0         | 95   | 0   | 26 | 0  | 1.00 |      | 0    | 3  | 0  | 0  | 2  | 0  |    |
| IPI00132169.1  | P62077   | Timm8b   | Mitochondrial import inner membrane translocase subunit Tim8 B |  | X |   |      | 0         | 83   | 0   | 31 | 0  | 1.00 |      | 0    | 3  | 0  | 0  | 3  | 0  |    |
| IPI00125513.1  | Q9WV98   | Timm9    | Mitochondrial import inner membrane translocase subunit Tim9   |  |   | X |      | 0         | 89   | 0   | 44 | 0  | 1.00 |      | 0    | 3  | 0  | 0  | 3  | 0  |    |
| IPI00221741.1  | Q8BH58   | Tipr1    | TIP41-like protein                                             |  | X |   |      | 1         | 271  | 18  | 0  | 0  | 1.00 |      | 2    | 0  | 0  | 2  | 0  | 0  |    |
| IPI00874522.1  | P39447   | Tjp1     | Tight junction protein ZO-1                                    |  | X |   |      | 0         | 1745 | 12  | 0  | 0  | 1.00 |      | 13   | 0  | 0  | 13 | 0  | 0  |    |
| IPI00323349.2  | Q9Z0U1   | Tjp2     | Tight junction protein ZO-2                                    |  | X | X | X    | 0         | 1167 | 12  | 3  | 6  | 1.00 | 1.00 | 1.00 | 8  | 3  | 5  | 8  | 3  | 5  |
| IPI00137409.3  | P40142   | Tkt      | Transketolase                                                  |  | X | X | X    | 1         | 623  | 32  | 49 | 24 | 1.00 | 1.00 | 1.00 | 12 | 22 | 11 | 12 | 22 | 11 |
| IPI00465786.3  | P26039   | Tln1     | Talin-1                                                        |  |   | X | X    | 3         | 2541 | 0   | 15 | 7  | 1.00 | 1.00 | 0    | 27 | 10 | 0  | 27 | 10 |    |
| IPI00875190.2  | Q8BH24   | Tm9sf4   | Transmembrane 9 superfamily member 4                           |  | X |   |      | 10        | 710  | 0   | 4  | 0  | 1.00 |      | 0    | 2  | 0  | 0  | 2  | 0  |    |
| IPI00466570.4  | Q9D1D4   | Tmed10   | Isoform 1 of Transmembrane emp24 domain-containing protein 10  |  | X |   | 1DE  | 1         | 219  | 0   | 15 | 0  | 1.00 |      | 0    | 3  | 0  | 0  | 2  | 0  |    |
| IPI00131606.2  | P52875   | Tmem165  | Transmembrane protein 165                                      |  |   | X |      | 6         | 323  | 0   | 9  | 0  | 0.99 |      | 0    | 2  | 0  | 0  | 2  | 0  |    |
| IPI00119478.1  | Q9JHJ0   | Tmod3    | Tropomodulin-3                                                 |  | X |   |      | 0         | 352  | 14  | 0  | 0  | 1.00 |      | 4    | 0  | 0  | 3  | 0  | 0  |    |
| IPI00828976.1  | Q3UCI5   | Tmpo     | Thymopoietin                                                   |  | X | X | X    | 1         | 452  | 18  | 8  | 13 | 1.00 | 1.00 | 1.00 | 4  | 3  | 4  | 4  | 3  | 4  |
| IPI00754323.1  | Q9WUU8-3 | Tnip1    | Isoform 3 of TNFAIP3-interacting protein 1                     |  | X |   | 2DLC | 0         | 646  | 5   | 0  | 0  | 1.00 |      | 2    | 0  | 0  | 2  | 0  | 0  |    |
| IPI00221523.4  | Q8BFY9   | Tnp1     | Transportin-1                                                  |  |   | X | X    | 3         | 898  | 0   | 6  | 10 | 1.00 | 1.00 | 0    | 5  | 7  | 0  | 5  | 7  |    |
| IPI00337947.10 | B1ATC3   | Tnrc6c   | trinucleotide repeat containing 6C                             |  | X |   |      | 1         | 1900 | 2   | 0  | 0  | 0.94 |      | 2    | 0  | 0  | 2  | 0  | 0  |    |
| IPI00353237.8  | Q5SSZ5   | Tns3     | Isoform 1 of Tensin-3                                          |  | X |   | 2DLC | 1         | 1440 | 5   | 0  | 0  | 1.00 |      | 4    | 0  | 0  | 4  | 0  | 0  |    |
| IPI00652758.1  | Q3UDC3   | Tom1     | target of myb1 homolog                                         |  | X |   |      | 0         | 516  | 8   | 0  | 0  | 1.00 |      | 2    | 0  | 0  | 2  | 0  | 0  |    |
| IPI00315135.3  | Q9CPQ3   | Tomm22   | Mitochondrial import receptor subunit TOM22 homolog            |  |   | X |      | 1         | 142  | 0   | 37 | 0  | 1.00 |      | 0    | 3  | 0  | 0  | 3  | 0  |    |
| IPI00165694.1  | Q9CYG7   | Tomm34   | Mitochondrial import receptor subunit TOM34                    |  | X |   | X    | 0         | 309  | 11  | 0  | 16 | 1.00 | 1.00 | 2    | 0  | 4  | 2  | 0  | 4  |    |
| IPI00474157.4  | Q9QYA2   | Tomm40   | Mitochondrial import receptor subunit TOM40 homolog            |  |   |   | X    | 1         | 361  | 0   | 0  | 5  |      | 1.00 | 0    | 0  | 2  | 0  | 0  | 2  |    |
| IPI00133289.1  | Q9D173   | Tomm7    | Mitochondrial import receptor subunit TOM7 homolog             |  |   | X |      | 1         | 55   | 0   | 44 | 0  | 1.00 |      | 0    | 2  | 0  | 0  | 2  | 0  |    |
| IPI00751137.1  | Q3TSX8   | Tomm70a  | Putative uncharacterized protein                               |  | X |   |      | 1         | 611  | 0   | 17 | 0  | 1.00 |      | 0    | 8  | 0  | 0  | 8  | 0  |    |
| IPI00109764.2  | Q04750   | Top1     | DNA topoisomerase 1                                            |  | X | X | X    | 0         | 767  | 5   | 12 | 5  | 1.00 | 1.00 | 1.00 | 2  | 7  | 4  | 2  | 7  | 4  |
| IPI00122223.1  | Q01320   | Top2a    | DNA topoisomerase 2-alpha                                      |  | X | X | X    | 1         | 1528 | 2   | 26 | 11 | 1.00 | 1.00 | 1.00 | 3  | 36 | 14 | 3  | 35 | 14 |
| IPI00625441.3  | Q62393   | Tpd52    | tumor protein D52                                              |  | X |   | X    | 0         | 247  | 35  | 0  | 17 | 1.00 | 1.00 | 1.00 | 7  | 0  | 4  | 6  | 0  | 4  |
| IPI00309878.4  | B2RUC1   | Tpd52l1  | Tpd52l1 protein                                                |  | X |   |      | 0         | 209  | 11  | 0  | 0  | 1.00 |      | 2    | 0  | 0  | 2  | 0  | 0  |    |
| IPI00755183.1  | A2AUD5   | Tpd52l2  | Tumor protein D52-like 2                                       |  | X |   |      | 0         | 229  | 34  | 0  | 0  | 1.00 |      | 8    | 0  | 0  | 6  | 0  | 0  |    |
| IPI00467833.5  | P17751   | Tpi1     | Triosephosphate isomerase                                      |  | X | X | X    | 0         | 249  | 42  | 61 | 43 | 1.00 | 1.00 | 1.00 | 8  | 11 | 7  | 8  | 11 | 7  |
| IPI00403987.2  | Q8BP43   | Tpm1     | Isoform 1 of Tropomyosin alpha-1 chain                         |  | X |   | X    | 2DLC      | 0    | 284 | 31 | 0  | 13   | 1.00 | 1.00 | 9  | 0  | 4  | 9  | 0  | 4  |
| IPI00874728.1  | P58774-2 | Tpm2     | Isoform 2 of Tropomyosin beta chain                            |  | X |   |      | 2DLC      | 0    | 284 | 28 | 0  | 0    | 1.00 |      | 8  | 0  | 0  | 8  | 0  | 0  |
| IPI00278611.7  | P21107   | Tpm3     | Isoform 2 of Tropomyosin alpha-3 chain                         |  | X | X |      | 2DLC, 1DE | 0    | 284 | 40 | 4  | 0    | 1.00 | 1.00 | 14 | 2  | 0  | 12 | 2  | 0  |
| IPI00459570.1  | Q8C7C3   | Tpm3     | Putative uncharacterized protein                               |  | X | X |      | 0         | 248  | 53  | 25 | 0  | 1.00 | 1.00 | 16   | 6  | 0  | 14 | 6  | 0  |    |
| IPI00169707.2  | P21107   | Tpm3     | Tropomyosin 3, gamma                                           |  | X | X |      | 0         | 285  | 36  | 4  | 0  | 1.00 | 1.00 | 16   | 2  | 0  | 12 | 2  | 0  |    |
| IPI00421223.3  | Q6IRU2   | Tpm4     | Tropomyosin alpha-4 chain                                      |  | X |   | X    | 0         | 248  | 30  | 0  | 18 | 1.00 | 1.00 | 11   | 0  | 4  | 9  | 0  | 3  |    |
| IPI00469194.2  | Q64514   | Tpp2     | Tripeptidyl-peptidase 2                                        |  |   |   | X    | 1         | 1262 | 0   | 0  | 3  |      | 1.00 | 0    | 0  | 3  | 0  | 0  | 3  |    |
| IPI00880644.1  | Q7M739   | Tpr      | Translocated promoter region                                   |  | X | X | X    | 0         | 2357 | 2   | 14 | 4  | 1.00 | 1.00 | 1.00 | 2  | 32 | 7  | 2  | 32 | 7  |
| IPI00316430.4  | Q3TQN1   | Tpst2    | tyrosylprotein sulfotransferase 2                              |  | X |   |      | 0         | 390  | 9   | 0  | 0  | 0.97 |      | 2    | 0  | 0  | 2  | 0  | 0  |    |
| IPI00420481.5  | A2APB8   | Tpx2     | TPX2, microtubule-associated protein homolog                   |  | X |   |      | 0         | 745  | 8   | 0  | 0  | 1.00 |      | 3    | 0  | 0  | 3  | 0  | 0  |    |
| IPI00377298.2  | Q6PFR5   | Tra2a    | transformer-2 alpha                                            |  | X | X |      | 0         | 282  | 16  | 7  | 0  | 1.00 | 0.97 | 3    | 2  | 0  | 3  | 2  | 0  |    |

|               |          |         |                                                                                                    |   |   |   |               |    |       |    |    |    |      |      |      |    |    |    |    |    |    |
|---------------|----------|---------|----------------------------------------------------------------------------------------------------|---|---|---|---------------|----|-------|----|----|----|------|------|------|----|----|----|----|----|----|
| IPI00139259.1 | P62996   | Tra2b   | Isoform 1 of Transformer-2 protein homolog beta                                                    | X | X |   | 2DLC, 1DE     | 0  | 288   | 22 | 14 | 0  | 1.00 | 1.00 | 4    | 3  | 0  | 4  | 3  | 0  |    |
| IPI00850286.1 |          | Trank1  | similar to hCG2042887                                                                              |   |   | X |               | 4  | 3015  | 0  | 0  | 1  |      | 0.91 | 0    | 0  | 3  | 0  | 0  | 3  |    |
| IPI00132762.1 | Q9CQN1   | Trap1   | Heat shock protein 75 kDa, mitochondrial Isoform Long of Transcription intermediary factor 1-alpha |   | X | X |               | 1  | 706   | 0  | 42 | 17 |      | 1.00 | 1.00 | 0  | 22 | 9  | 0  | 21 | 9  |
| IPI00131130.1 | Q64127   | Trim24  | Isoform 1 of Transcription intermediary factor 1-beta                                              | X |   |   | 2DLC          | 0  | 1051  | 8  | 0  | 0  | 1.00 |      | 6    | 0  | 0  | 6  | 0  | 0  |    |
| IPI00312128.3 | Q62318   | Trim28  | Isoform 1 of Transcription intermediary factor 1-beta                                              | X | X | X | 2DLC, 1DE, UF | 0  | 834   | 35 | 19 | 38 | 1.00 | 1.00 | 1.00 | 25 | 16 | 18 | 18 | 15 | 18 |
| IPI00409904.1 | Q99PP7   | Trim33  | E3 ubiquitin-protein ligase TRIM33                                                                 | X |   |   |               | 0  | 1142  | 4  | 0  | 0  | 1.00 |      | 4    | 0  | 0  | 4  | 0  | 0  |    |
| IPI00622738.2 | Q99KW3-2 | Triobp  | TRIO and F-actin-binding protein                                                                   | X |   |   |               | 0  | 2018  | 3  | 0  | 0  | 1.00 |      | 4    | 0  | 0  | 4  | 0  | 0  |    |
| IPI00229927.2 | Q8CJ53   | Trip10  | Cdc42-interacting protein 4                                                                        | X |   |   |               | 0  | 603   | 23 | 0  | 0  | 1.00 |      | 9    | 0  | 0  | 9  | 0  | 0  |    |
| IPI00380829.3 | B2RY51   | Trip11  | Thyroid hormone receptor interactor 11                                                             | X |   |   |               | 0  | 1976  | 3  | 0  | 0  | 0.99 |      | 3    | 0  | 0  | 3  | 0  | 0  |    |
| IPI00623570.3 |          | Trip12  | thyroid hormone receptor interactor 12                                                             |   | X | X |               | 3  | 2025  | 0  | 2  | 3  |      | 1.00 | 1.00 | 0  | 3  | 5  | 0  | 3  | 5  |
| IPI00874743.1 | Q8CE96   | Trm6    | 59 kDa protein                                                                                     | X |   |   |               | 0  | 526   | 17 | 0  | 0  | 1.00 |      | 5    | 0  | 0  | 4  | 0  | 0  |    |
| IPI00719897.1 | Q792Z1   | Try10   | trypsin 10                                                                                         | X |   | X |               | 0  | 246   | 19 | 0  | 15 | 1.00 |      | 1.00 | 5  | 0  | 2  | 4  | 0  | 2  |
| IPI00620969.2 | Q61037   | Tsc2    | Tuberin                                                                                            |   |   | X |               | 11 | 1814  | 0  | 0  | 4  |      | 0.97 | 0    | 0  | 4  | 0  | 0  | 4  |    |
| IPI00320543.5 | Q8BMZ5   | Tsen34  | Isoform 1 of tRNA-splicing endonuclease subunit Sen34                                              | X |   |   | 2DLC          | 0  | 316   | 9  | 0  | 0  | 1.00 |      | 2    | 0  | 0  | 2  | 0  | 0  |    |
| IPI00113052.1 | Q9CZR8   | Tsfm    | Elongation factor Ts, mitochondrial                                                                |   |   | X |               | 0  | 324   | 0  | 0  | 15 |      | 0.99 | 0    | 0  | 2  | 0  | 0  | 2  |    |
| IPI00118729.1 | Q99NF3   | Tsga14  | Isoform 1 of Centrosomal protein of 41 kDa                                                         | X |   |   | 2DLC          | 0  | 373   | 8  | 0  | 0  | 1.00 |      | 2    | 0  | 0  | 2  | 0  | 0  |    |
| IPI00664419.1 | Q5DTH5   | Tshz1   | Teashirt homolog 1                                                                                 |   |   | X |               | 0  | 1084  | 0  | 0  | 6  |      | 0.99 | 0    | 0  | 4  | 0  | 0  | 4  |    |
| IPI00124684.1 | Q62348   | Tsn     | Translin                                                                                           |   | X |   |               | 1  | 228   | 0  | 19 | 0  |      | 1.00 | 0    | 4  | 0  | 0  | 4  | 0  |    |
| IPI00130475.1 | Q91Z38   | Ttc1    | Tetratricopeptide repeat protein 1                                                                 | X |   |   |               | 0  | 292   | 24 | 0  | 0  | 1.00 |      | 4    | 0  | 0  | 4  | 0  | 0  |    |
| IPI00466645.3 | Q62187   | Ttf1    | Transcription termination factor 1                                                                 | X |   |   |               | 0  | 859   | 7  | 0  | 0  | 1.00 |      | 4    | 0  | 0  | 4  | 0  | 0  |    |
| IPI00845554.1 | A4Q9F4   | Tll11   | Tubulin polyglutamylase TLL11                                                                      | X |   |   |               | 2  | 727   | 6  | 0  | 0  | 1.00 |      | 3    | 0  | 0  | 3  | 0  | 0  |    |
| IPI00756257.1 | A2ASS6   | Ttn     | Isoform 1 of Titin                                                                                 |   | X | X | 1DE, UF       | 5  | 35213 | 0  | 0  | 1  |      | 1.00 | 1.00 | 0  | 7  | 27 | 0  | 7  | 27 |
| IPI00110753.1 | P68369   | Tuba1a  | Tubulin alpha-1A chain                                                                             | X | X | X |               | 0  | 451   | 27 | 67 | 44 | 1.00 | 1.00 | 1.00 | 8  | 28 | 15 | 8  | 23 | 15 |
| IPI00117348.4 | P05213   | Tuba1b  | Tubulin alpha-1B chain                                                                             | X | X |   |               | 0  | 451   | 27 | 53 | 0  | 1.00 | 1.00 | 8    | 17 | 0  | 8  | 15 | 0  |    |
| IPI00403810.2 | P68373   | Tuba1c  | Tubulin alpha-1C chain                                                                             | X | X |   |               | 0  | 449   | 28 | 68 | 0  | 1.00 | 1.00 | 8    | 26 | 0  | 8  | 23 | 0  |    |
| IPI00117350.1 | P68368   | Tuba4a  | Tubulin alpha-4A chain                                                                             | X | X | X |               | 0  | 448   | 18 | 52 | 42 | 0.00 | 1.00 | 1.00 | 5  | 22 | 14 | 5  | 19 | 14 |
| IPI00109061.1 | Q9CWF2   | Tubb2b  | Tubulin beta-2B chain                                                                              | X | X | X |               | 0  | 445   | 10 | 62 | 48 | 1.00 | 1.00 | 1.00 | 3  | 30 | 17 | 3  | 21 | 15 |
| IPI00169463.1 | P68372   | Tubb2c  | Tubulin beta-2C chain                                                                              | X | X | X |               | 0  | 445   | 10 | 69 | 46 | 1.00 | 1.00 | 1.00 | 3  | 30 | 18 | 3  | 21 | 15 |
| IPI00112251.1 | Q9ERD7   | Tubb3   | Tubulin beta-3 chain                                                                               | X | X | X |               | 0  | 450   | 4  | 35 | 34 | 0.73 | 1.00 | 1.00 | 2  | 19 | 12 | 2  | 12 | 11 |
| IPI00109073.5 | Q9D6F9   | Tubb4   | Tubulin beta-4 chain                                                                               | X | X |   |               | 0  | 444   | 6  | 57 | 0  | 0.01 | 0.99 | 1    | 25 | 0  | 1  | 17 | 0  |    |
| IPI00117352.1 | P99024   | Tubb5   | Tubulin beta-5 chain                                                                               | X | X | X |               | 0  | 444   | 10 | 73 | 59 | 1.00 | 1.00 | 1.00 | 3  | 34 | 21 | 3  | 23 | 18 |
| IPI00122928.1 | Q922F4   | Tubb6   | Tubulin beta-6 chain                                                                               | X | X | X |               | 0  | 447   | 4  | 28 | 32 | 0.73 | 1.00 | 1.00 | 2  | 15 | 10 | 2  | 10 | 10 |
| IPI00342749.3 | Q6PAM1   | Txlna   | Isoform 1 of Alpha-taxilin                                                                         | X |   |   | 2DLC          | 0  | 554   | 19 | 0  | 0  | 1.00 |      | 5    | 0  | 0  | 5  | 0  | 0  |    |
| IPI00226993.5 | P10639   | Txn1    | Thioredoxin                                                                                        | X | X | X |               | 0  | 105   | 23 | 35 | 30 | 1.00 | 1.00 | 1.00 | 2  | 3  | 3  | 2  | 3  | 3  |
| IPI00133110.1 | Q9CQU0   | Txndc12 | Thioredoxin domain-containing protein 12                                                           | X |   |   |               | 0  | 170   | 54 | 0  | 0  | 1.00 |      | 8    | 0  | 0  | 6  | 0  | 0  |    |
| IPI00471077.3 | Q9CQM5   | Txndc17 | Thioredoxin domain-containing protein 17                                                           | X |   |   |               | 0  | 123   | 36 | 0  | 0  | 1.00 |      | 3    | 0  | 0  | 3  | 0  | 0  |    |
| IPI00163011.2 | Q91W90   | Txndc5  | Thioredoxin domain-containing protein 5                                                            | X |   |   |               | 1  | 417   | 21 | 0  | 0  | 1.00 |      | 6    | 0  | 0  | 6  | 0  | 0  |    |
| IPI00654054.1 | Q3UNH3   | Txn1    | Putative uncharacterized protein (Fragment)                                                        | X |   | X |               | 0  | 301   | 19 | 0  | 9  | 1.00 | 0.98 | 5    | 0  | 2  | 4  | 0  | 2  |    |
| IPI00133298.2 | Q3TBP4   | Txn14a  | Putative uncharacterized protein                                                                   | X |   |   |               | 0  | 220   | 31 | 0  | 0  | 1.00 |      | 4    | 0  | 0  | 3  | 0  | 0  |    |
| IPI00776252.1 | Q9JMH6   | Txnrd1  | Thioredoxin reductase 1, cytoplasmic                                                               |   | X | X |               | 1  | 613   | 0  | 8  | 8  |      | 1.00 | 1.00 | 0  | 3  | 3  | 0  | 3  | 3  |
| IPI00130734.1 | P07607   | Tyms    | Thymidylate synthase                                                                               | X |   |   |               | 1  | 307   | 7  | 0  | 0  | 0.97 |      | 2    | 0  | 0  | 2  | 0  | 0  |    |
| IPI00113746.3 | P26369   | U2af2   | Splicing factor U2AF 65 kDa subunit                                                                | X | X | X |               | 0  | 475   | 24 | 12 | 16 | 1.00 | 1.00 | 1.00 | 6  | 4  | 5  | 6  | 4  | 5  |
| IPI00462482.3 | Q3TW96   | Uap11   | Isoform 1 of UDP-N-acetylhexosamine pyrophosphorylase-like protein 1                               | X |   |   | 2DLC          | 1  | 507   | 5  | 0  | 0  | 0.98 |      | 2    | 0  | 0  | 2  | 0  | 0  |    |
| IPI00123313.1 | Q02053   | Uba1    | Ubiquitin-like modifier-activating enzyme 1                                                        |   | X | X |               | 5  | 1058  | 0  | 35 | 17 |      | 1.00 | 1.00 | 0  | 24 | 13 | 0  | 24 | 13 |
| IPI00130173.1 | Q9Z1F9   | Uba2    | SUMO-activating enzyme subunit 2                                                                   | X | X | X |               | 2  | 638   | 14 | 24 | 19 | 1.00 | 1.00 | 1.00 | 7  | 10 | 6  | 6  | 9  | 6  |
| IPI00457533.2 | Q91VX2   | Ubp2    | Ubiquitin-associated protein 2                                                                     | X |   |   |               | 0  | 1132  | 16 | 0  | 0  | 1.00 |      | 11   | 0  | 0  | 9  | 0  | 0  |    |

|               |          |         |                                                           |   |   |   |      |    |      |    |    |    |      |      |      |      |   |    |    |   |    |
|---------------|----------|---------|-----------------------------------------------------------|---|---|---|------|----|------|----|----|----|------|------|------|------|---|----|----|---|----|
| IPI00761172.1 | Q80X50-2 | Ubp2l   | Isoform 2 of Ubiquitin-associated protein 2-like          | X | X | X | 2DLC | 0  | 1014 | 25 | 3  | 5  | 1.00 | 1.00 | 1.00 | 14   | 2 | 3  | 13 | 2 | 3  |
| IPI00133581.1 | Q9D1C1   | Ube2c   | Ubiquitin-conjugating enzyme E2 C                         |   |   | X |      | 0  | 179  | 0  | 0  | 13 |      |      | 1.00 | 0    | 0 | 2  | 0  | 0 | 2  |
| IPI00322440.5 | P610B7   | Ube2k   | Ubiquitin-conjugating enzyme E2 K                         |   | X |   |      | 1  | 200  | 0  | 43 | 0  |      |      | 1.00 | 0    | 6 | 0  | 0  | 6 | 0  |
| IPI00453803.5 | Q6ZPJ3   | Ube2o   | Ubiquitin-conjugating enzyme E2 O                         |   | X |   |      | 1  | 1288 | 0  | 5  | 0  |      |      | 1.00 | 0    | 3 | 0  | 0  | 3 | 0  |
| IPI00113257.3 | Q9CZY3   | Ube2v1  | Isoform 1 of Ubiquitin-conjugating enzyme E2 variant 1    | X | X |   | 2DLC | 0  | 147  | 39 | 18 | 0  | 1.00 | 1.00 |      | 5    | 3 | 0  | 4  | 3 | 0  |
| IPI00311591.3 | Q3UE37   | Ube2z   | Ubiquitin-conjugating enzyme E2 Z                         |   |   | X |      | 0  | 356  | 0  | 0  | 8  |      |      | 0.94 | 0    | 0 | 3  | 0  | 0 | 2  |
| IPI00131915.2 | Q78JW9   | Ubfd1   | Ubiquitin domain-containing protein UBFD1                 | X |   |   |      | 1  | 368  | 20 | 0  | 0  | 1.00 |      |      | 5    | 0 | 0  | 4  | 0 | 0  |
| IPI00387416.1 | Q9QZM0   | Ubqln2  | Ubiquilin-2                                               | X |   |   |      | 1  | 638  | 7  | 0  | 0  | 0.91 |      |      | 3    | 0 | 0  | 3  | 0 | 0  |
| IPI00648087.1 | Q6WKZ8-2 | Ubr2    | E3 ubiquitin-protein ligase UBR2                          |   |   | X |      | 8  | 1755 | 0  | 0  | 5  |      |      | 0.99 | 0    | 0 | 4  | 0  | 0 | 4  |
| IPI00648709.2 | A2AN08-5 | Ubr4    | E3 ubiquitin-protein ligase UBR4                          |   | X | X |      | 15 | 5208 | 0  | 5  | 0  |      |      | 1.00 | 0.94 | 0 | 18 | 2  | 0 | 18 |
| IPI00882371.1 | Q80TP3   | Ubr5    | 309 kDa protein                                           |   |   | X |      | 4  | 2799 | 0  | 0  | 2  |      |      | 1.00 | 0    | 0 | 3  | 0  | 0 | 3  |
| IPI00225151.1 | Q8BU04   | Ubr7    | Putative E3 ubiquitin-protein ligase UBR7                 | X |   |   |      | 0  | 425  | 6  | 0  | 0  | 1.00 |      |      | 3    | 0 | 0  | 3  | 0 | 0  |
| IPI00123589.1 | Q922Y1   | Ubxn1   | UBX domain-containing protein 1                           | X |   | X |      | 0  | 297  | 39 | 0  | 10 | 1.00 |      | 1.00 | 7    | 0 | 2  | 7  | 0 | 2  |
| IPI00653686.1 | Q3TCH2   | Uchl1   | Putative uncharacterized protein (Fragment)               |   |   | X | X    | 0  | 225  | 0  | 33 | 17 |      |      | 1.00 | 1.00 | 0 | 3  | 2  | 0 | 3  |
| IPI00311369.1 | Q9JKB1   | Uchl3   | Ubiquitin carboxyl-terminal hydrolase isozyme L3          | X | X | X |      | 0  | 230  | 22 | 15 | 20 | 1.00 | 1.00 | 1.00 | 3    | 2 | 4  | 3  | 2 | 4  |
| IPI00129471.3 | A2AN37   | Uck1    | uridine-cytidine kinase 1                                 |   |   | X |      | 1  | 283  | 0  | 0  | 12 |      |      | 0.96 | 0    | 0 | 2  | 0  | 0 | 2  |
| IPI00121203.1 | Q99PM9   | Uck2    | Uridine-cytidine kinase 2                                 |   |   | X |      | 2  | 261  | 0  | 0  | 23 |      |      | 1.00 | 0    | 0 | 3  | 0  | 0 | 3  |
| IPI00880407.1 | P61961   | Ufm1    | Ubiquitin-fold modifier 1                                 |   |   | X |      | 0  | 91   | 0  | 0  | 47 |      |      | 1.00 | 0    | 0 | 2  | 0  | 0 | 2  |
| IPI00762897.2 | Q6P5E4   | Ugg1    | UDP-glucose:glycoprotein glucosyltransferase 1            |   |   | X |      | 4  | 1551 | 0  | 5  | 0  |      |      | 1.00 | 0    | 5 | 0  | 0  | 5 | 0  |
| IPI00417180.3 | Q5FW80   | Ugt1a10 | UDP glycosyltransferase 1 family, polypeptide A10         |   |   |   | X    | 2  | 530  | 0  | 0  | 13 |      |      | 0.97 | 0    | 0 | 4  | 0  | 0 | 4  |
| IPI00130200.6 | Q8VDF2   | Uhrf1   | E3 ubiquitin-protein ligase UHRF1                         |   | X |   |      | 0  | 782  | 0  | 5  | 0  |      |      | 1.00 | 0    | 2 | 0  | 0  | 2 | 0  |
| IPI00121552.2 | P13439   | Umps    | Uridine 5'-monophosphate synthase                         | X | X |   |      | 0  | 481  | 0  | 11 | 20 |      |      | 1.00 | 1.00 | 0 | 3  | 5  | 0 | 3  |
| IPI00420949.3 | Q9EPU0   | Upf1    | Regulator of nonsense transcripts 1                       | X | X | X |      | 0  | 1124 | 4  | 3  | 6  | 1.00 | 1.00 | 1.00 | 3    | 3 | 6  | 3  | 3 | 6  |
| IPI00323353.3 | P52624   | Upp1    | Uridine phosphorylase 1                                   | X | X | X |      | 2  | 311  | 14 | 51 | 36 | 1.00 | 1.00 | 1.00 | 2    | 9 | 6  | 2  | 9 | 6  |
| IPI00653598.2 | Q3TV75   | Uqrc1   | ubiquinol-cytochrome c reductase core protein 1 precursor |   | X |   |      | 0  | 480  | 0  | 11 | 0  |      |      | 1.00 | 0    | 3 | 0  | 0  | 3 | 0  |
| IPI00119138.1 | Q9DB77   | Uqrc2   | Cytochrome b-c1 complex subunit 2, mitochondrial          |   | X | X |      | 0  | 453  | 0  | 16 | 8  |      |      | 1.00 | 1.00 | 0 | 6  | 2  | 0 | 5  |
| IPI00133240.1 | Q9CR68   | Uqrcfs1 | Cytochrome b-c1 complex subunit Rieske, mitochondrial     |   | X | X |      | 0  | 274  | 0  | 31 | 19 |      |      | 1.00 | 1.00 | 0 | 6  | 3  | 0 | 6  |
| IPI00668766.3 | Q571H0   | Urb1    | Nucleolar pre-ribosomal-associated protein 1              |   | X |   |      | 11 | 2378 | 0  | 4  | 0  |      |      | 1.00 | 0    | 6 | 0  | 0  | 6 | 0  |
| IPI00128071.7 | Q9Z1Z0   | Uso1    | General vesicular transport factor p115                   |   | X |   |      | 3  | 959  | 0  | 3  | 0  |      |      | 1.00 | 0    | 2 | 0  | 0  | 2 | 0  |
| IPI00420601.5 | P52479   | Usp10   | Ubiquitin carboxyl-terminal hydrolase 10                  | X | X | X |      | 0  | 792  | 13 | 9  | 6  | 1.00 | 1.00 | 1.00 | 7    | 5 | 3  | 7  | 5 | 3  |
| IPI00154012.1 | Q8R5H1   | Usp15   | Ubiquitin carboxyl-terminal hydrolase 15                  |   |   | X |      | 0  | 981  | 0  | 0  | 7  |      |      | 1.00 | 0    | 0 | 3  | 0  | 0 | 3  |
| IPI00420483.4 | Q3UJD6   | Usp19   | Ubiquitin carboxyl-terminal hydrolase 19                  |   |   | X |      | 2  | 1360 | 0  | 0  | 2  |      |      | 1.00 | 0    | 0 | 2  | 0  | 0 | 2  |
| IPI00668474.3 | Q6ZQ93-1 | Usp34   | Ubiquitin carboxyl-terminal hydrolase 34                  |   |   | X |      | 4  | 3393 | 0  | 1  | 0  |      |      | 1.00 | 0    | 2 | 0  | 0  | 2 | 0  |
| IPI00457815.3 | Q3TIX9   | Usp39   | U4/U6.U5 tri-snRNP-associated protein 2                   |   |   | X |      | 0  | 564  | 0  | 0  | 10 |      |      | 1.00 | 0    | 0 | 4  | 0  | 0 | 4  |
| IPI00884486.2 | Q8BTL9   | Usp4    | ubiquitin specific protease 4                             | X |   | X |      | 0  | 962  | 3  | 0  | 3  | 1.00 |      | 1.00 | 2    | 0 | 3  | 2  | 0 | 3  |
| IPI00463367.2 | Q6A4J8-2 | Usp7    | Ubiquitin carboxyl-terminal hydrolase 7                   |   | X | X |      | 0  | 1143 | 0  | 6  | 6  |      |      | 1.00 | 1.00 | 0 | 5  | 3  | 0 | 5  |
| IPI00798468.1 | A2AD18   | Usp9x   | Ubiquitin carboxyl-terminal hydrolase                     |   | X | X |      | 8  | 2558 | 0  | 15 | 3  |      |      | 1.00 | 1.00 | 0 | 30 | 7  | 0 | 29 |
| IPI00454162.3 | Q6J1H4   | Utf1    | Undifferentiated embryonic cell transcription factor 1    |   | X | X |      | 1  | 339  | 0  | 40 | 15 |      |      | 1.00 | 1.00 | 0 | 7  | 4  | 0 | 7  |

|               |        |         |                                                                     |   |   |   |      |    |      |    |    |    |      |      |      |    |    |    |    |    |    |
|---------------|--------|---------|---------------------------------------------------------------------|---|---|---|------|----|------|----|----|----|------|------|------|----|----|----|----|----|----|
| IPI00462762.2 | Q640M1 | Utp14a  | Isoform 1 of U3 small nucleolar RNA-associated protein 14 homolog A | X |   |   | 2DLC | 0  | 767  | 21 | 0  | 0  | 1.00 |      | 16   | 0  | 0  | 14 | 0  | 0  |    |
| IPI00226889.1 | Q8C7V3 | Utp15   | U3 small nucleolar RNA-associated protein 15 homolog                | X |   |   |      | 1  | 528  | 5  | 0  | 0  | 1.00 |      | 2    | 0  | 0  | 2  | 0  | 0  |    |
| IPI00353579.1 | Q5SSI6 | Utp18   | U3 small nucleolar RNA-associated protein 18 homolog                | X |   | X |      | 1  | 552  | 4  | 0  | 14 | 1.00 | 1.00 | 2    | 0  | 4  | 2  | 0  | 4  |    |
| IPI00850851.1 | Q5XG71 | Utp20   | down-regulated in metastasis                                        |   | X | X |      | 9  | 2789 | 0  | 7  | 3  | 1.00 | 1.00 | 0    | 14 | 7  | 0  | 14 | 7  |    |
| IPI00119776.1 | Q9J1I3 | Utp3    | Something about silencing protein 10                                |   |   | X |      | 0  | 469  | 0  | 0  | 6  |      | 0.97 | 0    | 0  | 3  | 0  | 0  | 3  |    |
| IPI00461832.2 | Q8VCY6 | Utp6    | U3 small nucleolar RNA-associated protein 6 homolog                 | X |   |   |      | 1  | 597  | 11 | 0  | 0  | 1.00 |      | 5    | 0  | 0  | 5  | 0  | 0  |    |
| IPI00125267.4 | Q9WV55 | Vapa    | Vesicle-associated membrane protein-associated protein A            |   |   | X |      | 0  | 249  | 0  | 0  | 16 |      | 1.00 | 0    | 0  | 4  | 0  | 0  | 4  |    |
| IPI00130353.5 | Q9Z1Q9 | Vars    | Valyl-tRNA synthetase                                               |   | X | X |      | 3  | 1263 | 0  | 18 | 11 | 1.00 | 1.00 | 0    | 12 | 6  | 0  | 12 | 6  |    |
| IPI00624876.3 | P70460 | Vasp    | Vasodilator-stimulated phosphoprotein                               |   |   | X |      | 0  | 375  | 0  | 0  | 6  |      | 0.95 | 0    | 0  | 2  | 0  | 0  | 2  |    |
| IPI00121851.2 | P61759 | Vbp1    | Prefoldin subunit 3                                                 | X |   |   |      | 0  | 196  | 16 | 0  | 0  | 1.00 |      | 3    | 0  | 0  | 2  | 0  | 0  |    |
| IPI00405227.3 | Q64727 | Vcl     | Vinculin                                                            |   |   | X |      | 0  | 1066 | 0  | 0  | 5  |      | 1.00 | 0    | 0  | 4  | 0  | 0  | 4  |    |
| IPI00622235.5 | Q01853 | Vcp     | Transitional endoplasmic reticulum ATPase                           | X | X | X |      | 1  | 806  | 28 | 37 | 37 | 0.11 | 1.00 | 1.00 | 21 | 18 | 20 | 17 | 18 | 20 |
| IPI00122549.1 | Q60932 | Vdac1   | Voltage-dependent anion-selective channel protein 1                 |   | X | X |      | 0  | 296  | 0  | 52 | 34 |      | 1.00 | 1.00 | 0  | 10 | 7  | 0  | 10 | 7  |
| IPI00122547.1 | Q60930 | Vdac2   | Voltage-dependent anion-selective channel protein 2                 |   | X | X |      | 0  | 295  | 0  | 32 | 39 |      | 1.00 | 1.00 | 0  | 7  | 8  | 0  | 7  | 8  |
| IPI00122548.3 | Q5EBQ0 | Vdac3   | Voltage-dependent anion channel 3                                   |   | X | X |      | 1  | 284  | 0  | 23 | 15 |      | 1.00 | 1.00 | 0  | 4  | 3  | 0  | 4  | 3  |
| IPI00227299.6 | P20152 | Vim     | Vimentin                                                            | X | X | X |      | 0  | 466  | 52 | 8  | 13 | 1.00 | 1.00 | 1.00 | 20 | 4  | 5  | 18 | 4  | 5  |
| IPI00551411.5 | Q8BX70 | Vps13c  | Vacuolar protein sorting-associated protein 13C                     |   | X |   |      | 10 | 3748 | 0  | 1  | 0  |      | 1.00 |      | 0  | 2  | 0  | 0  | 2  | 0  |
| IPI00111181.1 | Q9EQH3 | Vps35   | Vacuolar protein sorting-associated protein 35                      |   | X | X |      | 3  | 796  | 0  | 13 | 3  |      | 1.00 | 1.00 | 0  | 9  | 2  | 0  | 9  | 2  |
| IPI00153207.3 | Q8R0J7 | Vps37b  | Vacuolar protein sorting-associated protein 37B                     | X |   |   |      | 0  | 285  | 13 | 0  | 0  | 1.00 |      | 2    | 0  | 0  | 2  | 0  | 0  |    |
| IPI00133700.2 | P46467 | Vps4b   | Vacuolar protein sorting-associated protein 4B                      | X |   |   |      | 0  | 444  | 9  | 0  | 0  | 0.97 |      | 3    | 0  | 0  | 3  | 0  | 0  |    |
| IPI00132936.1 | Q80X41 | Vrk1    | Serine/threonine-protein kinase VRK1                                | X |   |   |      | 0  | 440  | 27 | 0  | 0  | 1.00 |      | 8    | 0  | 0  | 7  | 0  | 0  |    |
| IPI00221817.5 | Q99KC8 | Vwa5a   | von Willebrand factor A domain-containing protein 5A                |   |   | X |      | 0  | 793  | 0  | 0  | 3  |      | 1.00 | 0    | 0  | 2  | 0  | 0  | 2  |    |
| IPI00113738.2 | P32921 | Wars    | Tryptophanyl-tRNA synthetase, cytoplasmic                           | X |   | X |      | 2  | 481  | 6  | 0  | 9  | 1.00 | 1.00 | 2    | 0  | 3  | 2  | 0  | 3  |    |
| IPI00314748.7 | O88342 | Wdr1    | WD repeat-containing protein 1                                      |   | X |   |      | 1  | 606  | 0  | 0  | 10 |      | 1.00 | 0    | 0  | 5  | 0  | 0  | 5  |    |
| IPI00121562.1 | Q9JJA4 | Wdr12   | Ribosome biogenesis protein WDR12                                   |   | X |   |      | 0  | 423  | 0  | 0  | 19 |      | 1.00 | 0    | 0  | 4  | 0  | 0  | 4  |    |
| IPI00623264.2 |        | Wdr17   | WD repeat domain 17                                                 |   | X |   |      | 0  | 1297 | 0  | 0  | 3  |      | 0.98 | 0    | 0  | 2  | 0  | 0  | 2  |    |
| IPI00136252.3 | Q4VBE8 | Wdr18   | WD repeat-containing protein 18                                     |   | X |   |      | 1  | 431  | 0  | 0  | 10 |      | 1.00 | 0    | 0  | 2  | 0  | 0  | 2  |    |
| IPI00226275.2 | Q8C6G8 | Wdr26   | WD repeat-containing protein 26                                     | X |   |   |      | 1  | 641  | 6  | 0  | 0  | 1.00 |      | 2    | 0  | 0  | 2  | 0  | 0  |    |
| IPI00876121.1 | Q3TAA9 | Wdr36   | WD repeat domain 36                                                 |   |   | X |      | 2  | 899  | 0  | 0  | 4  |      | 0.95 | 0    | 0  | 3  | 0  | 0  | 3  |    |
| IPI00849919.1 | Q6ZQL4 | Wdr43   | WD repeat domain 43                                                 |   | X | X |      | 0  | 719  | 0  | 8  | 8  | 1.00 | 1.00 | 0    | 5  | 5  | 0  | 5  | 5  |    |
| IPI00129141.1 | Q9Z0H1 | Wdr46   | WD repeat-containing protein 46                                     | X | X |   |      | 0  | 622  | 19 | 5  | 0  | 1.00 | 1.00 | 7    | 2  | 0  | 6  | 2  | 0  |    |
| IPI00139957.1 | P61965 | Wdr5    | WD repeat-containing protein 5                                      | X |   |   |      | 0  | 334  | 9  | 0  | 0  | 0.99 |      | 2    | 0  | 0  | 2  | 0  | 0  |    |
| IPI00117632.2 | Q3TEZ2 | Wdr6    | Putative uncharacterized protein                                    |   |   | X |      | 0  | 1125 | 0  | 0  | 7  |      | 1.00 | 0    | 0  | 4  | 0  | 0  | 4  |    |
| IPI00112320.4 | Q9ERF3 | Wdr61   | WD repeat-containing protein 61                                     |   | X |   |      | 1  | 305  | 0  | 0  | 12 |      | 1.00 | 0    | 0  | 2  | 0  | 0  | 2  |    |
| IPI00122120.1 | Q8VCG3 | Wdr74   | WD repeat-containing protein 74                                     | X |   |   |      | 0  | 384  | 11 | 0  | 0  | 1.00 |      | 3    | 0  | 0  | 3  | 0  | 0  |    |
| IPI00114819.3 | Q99J09 | Wdr77   | Methylosome protein 50                                              |   |   | X |      | 0  | 342  | 0  | 0  | 9  |      | 1.00 | 0    | 0  | 2  | 0  | 0  | 2  |    |
| IPI00132977.1 | Q9D0R9 | Wdr89   | WD repeat-containing protein 89                                     | X |   |   |      | 0  | 386  | 8  | 0  | 0  | 0.98 |      | 2    | 0  | 0  | 2  | 0  | 0  |    |
| IPI00229685.2 | Q8CHP5 | Wibg    | Partner of Y14 and mago                                             | X |   |   |      | 0  | 203  | 52 | 0  | 0  | 1.00 |      | 7    | 0  | 0  | 7  | 0  | 0  |    |
| IPI00120744.1 | Q9DCD2 | Xab2    | Pre-mRNA-splicing factor SYF1                                       | X |   |   |      | 0  | 855  | 9  | 0  | 0  | 1.00 |      | 7    | 0  | 0  | 6  | 0  | 0  |    |
| IPI00170021.1 | Q8K2X7 | Xpa     | Xpa protein                                                         | X |   |   |      | 0  | 279  | 13 | 0  | 0  | 1.00 |      | 2    | 0  | 0  | 2  | 0  | 0  |    |
| IPI00420231.4 | Q3UE92 | Xpnpep1 | X-prolyl aminopeptidase (Aminopeptidase P) 1, soluble               |   | X | X |      | 2  | 666  | 0  | 7  | 8  |      | 1.00 | 1.00 | 0  | 3  | 4  | 0  | 3  | 4  |

|               |          |               |                                                                |   |   |      |  |   |      |    |    |    |      |      |      |    |    |    |    |    |    |
|---------------|----------|---------------|----------------------------------------------------------------|---|---|------|--|---|------|----|----|----|------|------|------|----|----|----|----|----|----|
| IPI00395038.3 | Q6P5F9   | Xpo1          | Exportin-1                                                     |   | X | X    |  | 2 | 1071 | 0  | 21 | 10 | 1.00 | 1.00 | 0    | 17 | 8  | 0  | 17 | 8  |    |
| IPI00321154.4 | P27641   | Xrcc5         | ATP-dependent DNA helicase 2 subunit 2                         |   | X |      |  | 1 | 732  | 0  | 6  | 0  | 1.00 |      | 0    | 2  | 0  | 0  | 2  | 0  |    |
| IPI00132424.4 | P23475   | Xrcc6         | ATP-dependent DNA helicase 2 subunit 1                         | X | X |      |  | 0 | 608  | 20 | 5  | 0  | 1.00 | 1.00 | 11   | 2  | 0  | 10 | 2  | 0  |    |
| IPI00120046.1 | Q9DBR1   | Xrn2          | 5'-3' exoribonuclease 2                                        | X |   |      |  | 1 | 951  | 5  | 0  | 0  | 1.00 |      | 4    | 0  | 0  | 4  | 0  | 0  |    |
| IPI00108989.4 | Q91WL1   | Yap1          | Yes-associated protein 1                                       | X |   |      |  | 0 | 488  | 13 | 0  | 0  | 1.00 |      | 5    | 0  | 0  | 4  | 0  | 0  |    |
| IPI00314153.4 | A2A7S7   | Yars          | Tyrosyl-tRNA synthetase                                        | X |   | X    |  | 0 | 564  | 12 | 0  | 11 | 0.99 | 1.00 | 3    | 0  | 5  | 3  | 0  | 5  |    |
| IPI00896734.1 | B2RUF0   | Ybx2          | Y box protein 2                                                | X |   |      |  | 1 | 359  | 9  | 0  | 0  | 1.00 |      | 3    | 0  | 0  | 3  | 0  | 0  |    |
| IPI00621973.3 | Q9R0I7   | Ylpm1         | YLP motif containing 1                                         | X |   |      |  | 0 | 1941 | 2  | 0  | 0  | 1.00 |      | 2    | 0  | 0  | 2  | 0  | 0  |    |
| IPI00752810.1 | A2AWN8   | Ythdf1        | YTH domain family 1                                            | X |   |      |  | 0 | 586  | 11 | 0  | 0  | 1.00 |      | 3    | 0  | 0  | 3  | 0  | 0  |    |
| IPI00314865.9 | Q3UNH5   | Ythdf2        | Putative uncharacterized protein                               | X |   |      |  | 0 | 584  | 5  | 0  | 0  | 1.00 |      | 2    | 0  | 0  | 2  | 0  | 0  |    |
| IPI00227149.4 | Q8BYK6-3 | Ythdf3        | YTH domain family protein 3                                    | X |   |      |  | 0 | 596  | 9  | 0  | 0  | 1.00 |      | 3    | 0  | 0  | 3  | 0  | 0  |    |
| IPI00230682.6 | Q9CQV8   | Ywhab         | 14-3-3 protein beta/alpha                                      | X | X | X    |  | 1 | 246  | 4  | 48 | 42 | 0.00 | 1.00 | 1.00 | 2  | 13 | 9  | 1  | 12 | 9  |
| IPI00118384.1 | P62259   | Ywhae         | 14-3-3 protein epsilon                                         | X | X | X    |  | 1 | 255  | 4  | 55 | 45 | 0.00 | 1.00 | 1.00 | 2  | 16 | 11 | 1  | 14 | 10 |
| IPI00230707.6 | P61982   | Ywhag         | 14-3-3 protein gamma                                           | X | X | X    |  | 0 | 247  | 10 | 57 | 49 | 1.00 | 1.00 | 1.00 | 3  | 13 | 11 | 2  | 12 | 11 |
| IPI00227392.5 | P68510   | Ywhah         | 14-3-3 protein eta                                             | X | X | X    |  | 0 | 246  | 4  | 38 | 28 | 0.00 | 1.00 | 1.00 | 2  | 11 | 7  | 1  | 10 | 7  |
| IPI00853924.1 | P68254   | Ywhaq         | 14-3-3 protein theta                                           | X | X | X    |  | 0 | 303  | 9  | 43 | 42 | 0.99 | 1.00 | 1.00 | 3  | 13 | 12 | 2  | 12 | 12 |
| IPI00116498.1 | P63101   | Ywhaz         | 14-3-3 protein zeta/delta                                      | X | X | X    |  | 1 | 245  | 4  | 53 | 52 | 0.00 | 1.00 | 1.00 | 2  | 13 | 11 | 1  | 12 | 11 |
| IPI00421162.4 | Q6NZF1   | Zc3h11a       | Zinc finger CCCH domain-containing protein 11A                 | X |   |      |  | 0 | 792  | 14 | 0  | 0  | 1.00 |      | 6    | 0  | 0  | 6  | 0  | 0  |    |
| IPI00515528.2 |          | Zc3h13        | RIKEN cDNA 3110050K21                                          | X |   |      |  | 0 | 1729 | 2  | 0  | 0  | 1.00 |      | 2    | 0  | 0  | 2  | 0  | 0  |    |
| IPI00461416.4 | Q8BJ05   | Zc3h14        | Isoform 1 of Zinc finger CCCH domain-containing protein 14     | X |   | 2DLC |  | 0 | 735  | 9  | 0  | 0  | 1.00 |      | 4    | 0  | 0  | 3  | 0  | 0  |    |
| IPI00223503.1 | Q8BPK2   | Zcchc3        | zinc finger, CCHC domain containing 3                          | X |   |      |  | 0 | 400  | 15 | 0  | 0  | 1.00 |      | 4    | 0  | 0  | 3  | 0  | 0  |    |
| IPI00458460.1 | Q88466   | Zfp106        | Zinc finger protein 106                                        | X |   |      |  | 1 | 1888 | 2  | 0  | 0  | 1.00 |      | 2    | 0  | 0  | 2  | 0  | 0  |    |
| IPI00387481.3 | Q62394   | Zfp185        | zinc finger protein 185                                        | X |   |      |  | 0 | 486  | 14 | 0  | 0  | 1.00 |      | 5    | 0  | 0  | 5  | 0  | 0  |    |
| IPI00125510.1 | Q9JMD0   | Zfp207        | Zinc finger protein 207                                        | X |   | X    |  | 0 | 495  | 0  | 0  | 11 |      | 1.00 | 0    | 0  | 3  | 0  | 0  | 3  |    |
| IPI00469594.3 | Q6IQX8   | Zfp219        | zinc finger protein 219                                        | X |   | X    |  | 0 | 726  | 29 | 0  | 4  | 1.00 | 0.98 | 12   | 0  | 2  | 12 | 0  | 2  |    |
| IPI00124803.1 | Q62384   | Zfp259        | Zinc finger protein ZPR1                                       | X |   |      |  | 0 | 459  | 11 | 0  | 0  | 1.00 |      | 4    | 0  | 0  | 4  | 0  | 0  |    |
| IPI00116926.4 | Q99L15   | Zfp281        | Zinc finger protein 281                                        | X |   |      |  | 0 | 893  | 13 | 0  | 0  | 1.00 |      | 6    | 0  | 0  | 6  | 0  | 0  |    |
| IPI00282808.7 | B0V2M3   | Zfp318        | zinc finger protein 318                                        | X |   |      |  | 0 | 2237 | 1  | 0  | 0  | 0.99 |      | 2    | 0  | 0  | 2  | 0  | 0  |    |
| IPI00411014.1 | Q6NXX2   | Zfp532        | Zinc finger protein 532                                        | X |   |      |  | 0 | 1036 | 11 | 0  | 0  | 1.00 |      | 6    | 0  | 0  | 6  | 0  | 0  |    |
| IPI00112984.4 | Q6P9P9   | Zfp655        | Zinc finger protein 655                                        | X |   |      |  | 0 | 541  | 8  | 0  | 0  | 1.00 |      | 3    | 0  | 0  | 3  | 0  | 0  |    |
| IPI00320645.1 | Q8R1N0   | Zfp830        | Zinc finger protein 830                                        | X |   |      |  | 0 | 363  | 18 | 0  | 0  | 1.00 |      | 4    | 0  | 0  | 4  | 0  | 0  |    |
| IPI00377729.3 | Q80U44   | Zfyve16       | Zinc finger FYVE domain-containing protein 16                  |   |   | X    |  | 2 | 1528 | 0  | 0  | 4  |      | 0.94 | 0    | 0  | 4  | 0  | 0  | 4  |    |
| IPI00119998.6 | Q9DAZ9   | Zfyve19       | Zinc finger FYVE domain-containing protein 19                  | X |   |      |  | 0 | 389  | 15 | 0  | 0  | 1.00 |      | 3    | 0  | 0  | 3  | 0  | 0  |    |
| IPI00755765.1 | Q1WG82   | Zglp1         | GATA-like protein 1                                            |   |   | X    |  | 0 | 266  | 0  | 0  | 14 |      | 0.94 | 0    | 0  | 3  | 0  | 0  | 3  |    |
| IPI00132099.1 | Q9CPW7   | Zmat2         | Zinc finger matrin-type protein 2                              | X |   |      |  | 0 | 199  | 19 | 0  | 0  | 0.99 |      | 2    | 0  | 0  | 2  | 0  | 0  |    |
| IPI00354840.5 | Q8CIE2   | Zmiz2         | Zinc finger MIZ domain-containing protein 2                    |   |   | X    |  | 2 | 920  | 0  | 0  | 7  |      | 1.00 | 0    | 0  | 2  | 0  | 0  | 2  |    |
| IPI00896685.1 | B2RW16   | Znhit6        | MCG7779                                                        | X |   |      |  | 0 | 460  | 12 | 0  | 0  | 1.00 |      | 3    | 0  | 0  | 3  | 0  | 0  |    |
| IPI00756815.2 |          | Zscan10       | zinc finger and SCAN domains 10                                | X |   |      |  | 0 | 782  | 10 | 0  | 0  | 1.00 |      | 4    | 0  | 0  | 4  | 0  | 0  |    |
| IPI00228360.3 | Q62523   | Zyx           | Zyxin                                                          | X |   |      |  | 0 | 564  | 7  | 0  | 0  | 0.99 |      | 2    | 0  | 0  | 2  | 0  | 0  |    |
| IPI00117687.1 | P59708   | 0610009D07Rik | Pre-mRNA branch site protein p14                               | X | X |      |  | 0 | 125  | 30 | 20 | 0  | 1.00 | 1.00 | 3    | 2  | 0  | 3  | 2  | 0  |    |
| IPI00265101.6 | Q9DCT6   | 0610010K14Rik | Uncharacterized potential DNA-binding protein C17orf49 homolog | X |   |      |  | 0 | 171  | 18 | 0  | 0  | 1.00 |      | 2    | 0  | 0  | 2  | 0  | 0  |    |
| IPI00624581.3 | Q3UHU5   | 1110012J17Rik | Uncharacterized protein KIAA0802                               | X |   |      |  | 0 | 1945 | 2  | 0  | 0  | 1.00 |      | 2    | 0  | 0  | 2  | 0  | 0  |    |
| IPI00153381.1 | Q8R111   | 1110020P15Rik | Cytochrome b-c1 complex subunit 9                              |   |   | X    |  | 1 | 64   | 0  | 38 | 0  |      | 1.00 | 0    | 2  | 0  | 0  | 2  | 0  |    |
| IPI00119018.1 | Q9DAT2   | 1600027N09Rik | Isoform 1 of MRG-binding protein                               | X |   | 2DLC |  | 0 | 218  | 16 | 0  | 0  | 1.00 |      | 2    | 0  | 0  | 2  | 0  | 0  |    |
| IPI00758326.1 | A2ANS5   | 1700037H04Rik | Novel protein                                                  | X |   |      |  | 0 | 177  | 19 | 0  | 0  | 1.00 |      | 2    | 0  | 0  | 2  | 0  | 0  |    |
| IPI00317684.8 | Q8CCJ3   | 1810074P20Rik | UPF0555 protein KIAA0776                                       |   |   | X    |  | 3 | 793  | 0  | 0  | 5  |      | 0.97 | 0    | 0  | 4  | 0  | 0  | 4  |    |
| IPI00110487.1 | Q9D7M1   | 2310003C23Rik | Protein C20orf11 homolog                                       | X |   |      |  | 0 | 228  | 24 | 0  | 0  | 1.00 |      | 3    | 0  | 0  | 3  | 0  | 0  |    |
| IPI00173157.4 | Q9CR41   | 2310003F16Rik | Isoform 1 of Huntingtin-interacting protein K                  | X |   | 2DLC |  | 0 | 129  | 49 | 0  | 0  | 1.00 |      | 16   | 0  | 0  | 8  | 0  | 0  |    |
| IPI00110208.1 | Q9D7E4   | 2310011J03Rik | UPF0449 protein C19orf25 homolog                               | X |   |      |  | 0 | 109  | 18 | 0  | 0  | 1.00 |      | 2    | 0  | 0  | 2  | 0  | 0  |    |



|               |        |               |                                                      |   |      |   |      |    |    |    |      |      |   |   |   |   |   |   |
|---------------|--------|---------------|------------------------------------------------------|---|------|---|------|----|----|----|------|------|---|---|---|---|---|---|
| IPI00225761.5 | Q80VC9 | 2310057J16Rik | Calmodulin-regulated spectrin-associated protein 3   | X |      | 1 | 1252 | 0  | 0  | 5  |      | 0.99 | 0 | 0 | 2 | 0 | 0 | 2 |
| IPI00553266.3 | Q9CS00 | 2510012J08Rik | Uncharacterized protein C19orf29 homolog             | X |      | 0 | 772  | 9  | 0  | 0  | 1.00 |      | 6 | 0 | 0 | 6 | 0 | 0 |
| IPI00225952.1 | Q8C5P7 | 2610019F03Rik | Isoform 1 of Uncharacterized protein C8orf42 homolog | X | 2DLC | 0 | 182  | 32 | 0  | 0  | 1.00 |      | 4 | 0 | 0 | 4 | 0 | 0 |
| IPI00330623.3 | Q8BMC4 | 2610027L16Rik | Pumilio domain-containing protein C14orf21 homolog   |   | X    | 2 | 636  | 0  | 0  | 13 |      | 0.96 | 0 | 0 | 4 | 0 | 0 | 4 |
| IPI00132352.2 | Q9D0B6 | 2610029G23Rik | Isoform 1 of UPF0368 protein Cxorf26 homolog         | X | 2DLC | 0 | 198  | 18 | 0  | 0  | 1.00 |      | 3 | 0 | 0 | 3 | 0 | 0 |
| IPI00221678.1 | Q8BGR1 | 2610034M16Rik | MCG20355                                             | X |      | 0 | 1238 | 2  | 0  | 0  | 0.94 |      | 2 | 0 | 0 | 2 | 0 | 0 |
| IPI00269223.1 | Q91V83 | 2610036D13Rik | Uncharacterized protein KIAA0406 homolog             | X |      | 2 | 1085 | 4  | 0  | 0  | 0.92 |      | 2 | 0 | 0 | 2 | 0 | 0 |
| IPI00830853.1 | Q6NV83 | 2610101N10Rik | U2-associated protein SR140                          |   | X    | 0 | 1029 | 0  | 2  | 0  |      | 0.99 | 0 | 2 | 0 | 0 | 2 | 0 |
| IPI00408270.2 | B1AV75 | 2610301B20Rik | Novel protein                                        | X |      | 0 | 210  | 11 | 0  | 0  | 1.00 |      | 2 | 0 | 0 | 2 | 0 | 0 |
| IPI00132456.1 | Q9CQE8 | 2700060E02Rik | UPF0568 protein C14orf166 homolog                    | X | X    | 0 | 244  | 32 | 0  | 9  | 1.00 | 0.99 | 6 | 0 | 2 | 5 | 0 | 2 |
| IPI00845697.1 | Q9CZF4 | 2810004N23Rik | hypothetical protein LOC66523                        | X |      | 0 | 281  | 19 | 0  | 0  | 1.00 |      | 4 | 0 | 0 | 4 | 0 | 0 |
| IPI00354163.6 | Q5DTW7 | 2810474O19Rik | Uncharacterized protein C12orf35 homolog             | X |      | 0 | 1521 | 3  | 0  | 0  | 0.98 |      | 2 | 0 | 0 | 2 | 0 | 0 |
| IPI00752148.1 | A2AN41 | 2900010J23Rik | RIKEN cDNA 2900010J23                                | X |      | 0 | 121  | 62 | 0  | 0  | 1.00 |      | 8 | 0 | 0 | 6 | 0 | 0 |
| IPI00758006.1 | Q9D6E6 | 2900073G15Rik | Putative uncharacterized protein                     | X |      | 0 | 172  | 23 | 0  | 0  | 1.00 |      | 3 | 0 | 0 | 3 | 0 | 0 |
| IPI00109809.4 | Q9D1F5 | 3010026O09Rik | UPF0544 protein C5orf45 homolog                      | X |      | 0 | 335  | 14 | 0  | 0  | 1.00 |      | 3 | 0 | 0 | 3 | 0 | 0 |
| IPI00110456.2 | Q9CXL3 | 3110082I17Rik | Isoform 1 of Uncharacterized protein C7orf50 homolog | X | 2DLC | 0 | 195  | 35 | 0  | 0  | 1.00 |      | 5 | 0 | 0 | 5 | 0 | 0 |
| IPI00316088.3 | A2TJV2 | 4432412L15Rik | Paralemmin-3                                         |   | X    | 0 | 734  | 0  | 3  | 0  |      | 1.00 | 0 | 2 | 0 | 0 | 2 | 0 |
| IPI00222228.5 |        | 4732456N10Rik | Putative uncharacterized protein                     | X |      | 0 | 538  | 12 | 0  | 0  | 1.00 |      | 9 | 0 | 0 | 8 | 0 | 0 |
| IPI00137643.4 | Q9D513 | 4930528F23Rik | Uncharacterized protein C16orf73 homolog             |   | X    | 0 | 470  | 0  | 0  | 6  |      | 0.97 | 0 | 0 | 2 | 0 | 0 | 2 |
| IPI00221782.3 | Q8BGY7 | 4933403F05Rik | Uncharacterized protein C18orf19 homolog             |   | X    | 2 | 273  | 0  | 13 | 0  |      | 0.99 | 0 | 2 | 0 | 0 | 2 | 0 |
| IPI00381415.6 | A2AG58 | A830080D01Rik | Uncharacterized protein CXorf23 homolog              | X |      | 0 | 752  | 12 | 0  | 0  | 1.00 |      | 7 | 0 | 0 | 6 | 0 | 0 |
| IPI00808177.1 |        | AA623943      | Hypothetical protein                                 |   | X    | 1 | 149  | 0  | 22 | 0  |      | 0.92 | 0 | 2 | 0 | 0 | 2 | 0 |

**Table s3.** Peptides identified in the current study. Listed are the IPI and UniProt accession numbers, gene symbol, protein name, and the peptide sequences identified in each of the three proteomic strategies. All details regarding peptides identified, including spectra, are provided in the PRIDE database.

| IPI           | UNIPROT | GENE          | Protein                                                                     | Peptides - 2DLC                                                                                                                                                                  | Peptides - 1DE                 | Peptides - UF                                                                                      |
|---------------|---------|---------------|-----------------------------------------------------------------------------|----------------------------------------------------------------------------------------------------------------------------------------------------------------------------------|--------------------------------|----------------------------------------------------------------------------------------------------|
| IPI00117687.1 | P59708  | 0610009D07Rik | Pre-mRNA branch site protein p14                                            | GTAYVVYEDIFDAK,ITAEEMYDIFGK,Y<br>LVVLYYNANR                                                                                                                                      | GTAYVVYEDIFDAK,YLVVLYYNA<br>NR |                                                                                                    |
| IPI00265101.6 | Q9DCT6  | 0610010K14Rik | Isoform 1 of Uncharacterized potential DNA-binding protein C17orf49 homolog | LGELTMQLHPVSDSSPAGAK,WTETEI<br>EMLR                                                                                                                                              |                                |                                                                                                    |
| IPI00624581.3 | Q3UHU5  | 1110012J17Rik | Isoform 1 of Uncharacterized protein KIAA0802                               | TAGTQTIQTISVGLQTEALR,QDLSAPP<br>GYLTENVAR                                                                                                                                        |                                |                                                                                                    |
| IPI00153381.1 | Q8R111  | 1110020P15Rik | Cytochrome b-c1 complex subunit 9                                           |                                                                                                                                                                                  | AFDQGADAIYEHINEGK,LYSLLFR      |                                                                                                    |
| IPI00119018.1 | Q9DAT2  | 1600027N09Rik | Isoform 1 of MRG-binding protein                                            | NFVLPDEIIQEVR,NSSDLGCKEGQTA<br>ERTGSLTR                                                                                                                                          |                                |                                                                                                    |
| IPI00758326.1 | A2ANS5  | 1700037H04Rik | Novel protein                                                               | LLSVTPTSEGYSIK,LHDSVVMVTQES<br>DNSFLVK                                                                                                                                           |                                |                                                                                                    |
| IPI00317684.8 | Q8CCJ3  | 1810074P20Rik | Isoform 1 of UPF0555 protein KIAA0776                                       |                                                                                                                                                                                  |                                | QLVSQNK,KSSVTEE,GLFSAITRPT<br>PVNSLVSK,ELQELSLSIK                                                  |
| IPI00110487.1 | Q9D7M1  | 2310003C23Rik | Protein C20orf11 homolog                                                    | LIMNYLVTEGFK,GQIQEAIALINSLHPE<br>LLDTNR,ETEAALEFAQTQLAEQGEES<br>R                                                                                                                |                                |                                                                                                    |
| IPI00173157.4 | Q9CR41  | 2310003F16Rik | Isoform 1 of Huntingtin-interacting protein K                               | EIQSSNLETAMSVIGDR,VTDYAEEKEI<br>QSSNLETAMSVIGDR,SLREHMGNNV<br>EALIALTN,EHMGNNVEALIALTN,EDLE<br>LIMTEMEISR,VTDYAEEKEIQSSNLET<br>AMSVIGDRR,KEDLELIMTEMEISR,VTI<br>KKEDLELIMTEMEISR |                                |                                                                                                    |
| IPI00110208.1 | Q9D7E4  | 2310011J03Rik | UPF0449 protein C19orf25 homolog                                            | VVLPTRPAPPTVEQILEDVDR,PAPPTVE<br>QILEDVDR                                                                                                                                        |                                |                                                                                                    |
| IPI00225761.5 | Q80VC9  | 2310057J16Rik | Isoform 1 of Calmodulin-regulated spectrin-associated protein 3             |                                                                                                                                                                                  |                                | VNLVLLAEMYMCFEVLKPDFVQA<br>K,APCFPNVTTLQDLASGAALAATIH<br>CYCPQLLR                                  |
| IPI00553266.3 | Q9CS00  | 2510012J08Rik | Uncharacterized protein C19orf29 homolog                                    | TYNQLQVIFQGIEGK,LKQEQGVESEP<br>LFPILK,QQGVESEPLFPILK,FNIFYPD<br>LIR,DMTTITEDEIAK,EGVNASVSSDVQ<br>SVFK                                                                            |                                |                                                                                                    |
| IPI00225952.1 | Q8C5P7  | 2610019F03Rik | Uncharacterized protein C8orf42 homolog                                     | LTAEDVVADHTEDDR,EATSLFNKDDE<br>EHLLETSR,SGFWDALVLK,VLLDEPPE<br>EEDVLR                                                                                                            |                                |                                                                                                    |
| IPI00330623.3 | Q8BMC4  | 2610027L16Rik | Pumilio domain-containing protein C14orf21 homolog                          |                                                                                                                                                                                  |                                | SLSALTGPQLLTLAQSPAGSHVFDA<br>ILSSPSVTHK,TLLQVLGGTLESER,<br>AEQAPEALPHLSPEALGYFRR,VLD<br>AIWGAALGAR |
| IPI00132352.2 | Q9D0B6  | 2610029G23Rik | Isoform 1 of UPF0368 protein Cxorf26 homolog                                | IQFFAIEIAR,LISSVDPQFLK,FEGIVED<br>YNYGTLLR                                                                                                                                       |                                |                                                                                                    |
| IPI00221678.1 | Q8BGR1  | 2610034M16Rik | MCG20355                                                                    | KQNTFINICHPNSIGK,LEGAEVDIDNSL<br>GK                                                                                                                                              |                                |                                                                                                    |

|               |        |               |                                                       |                                                                                                                                   |                                           |
|---------------|--------|---------------|-------------------------------------------------------|-----------------------------------------------------------------------------------------------------------------------------------|-------------------------------------------|
| IPI00269223.1 | Q91V83 | 2610036D13Rik | Uncharacterized protein KIAA0406 homolog              | KQAAMILNELVVGAAGLDVEDIHNK,ALIQVLELEVTDVKMVEER                                                                                     |                                           |
| IPI00830853.1 | Q6NV83 | 2610101N10Rik | Isoform 1 of U2-associated protein SR140              |                                                                                                                                   | MIEFVVR,LQNIFLGLVNIIEEK                   |
| IPI00408270.2 | B1AV75 | 2610301B20Rik | Novel protein                                         | IVSYNDYMWWDK,DLDELLDEVETK                                                                                                         |                                           |
| IPI00132456.1 | Q9CQE8 | 2700060E02Rik | UPF0568 protein C14orf166 homolog                     | QEAIWLLGLAVR,HILGFDTGDAVLN<br>EAAQILR,AGVMALANLLQIQR,INEAIV<br>AVQAIADPK,NAEPLINLDVNNPDFK                                         | AGVMALANLLQIQR,KNTDNAAK                   |
| IPI00845697.1 | Q9CZF4 | 2810004N23Rik | hypothetical protein LOC66523                         | TLYDLGETEGETEYK,LREELQSAPAA<br>PSEVPVTTAVSLSPPK,DVDIQEFNLEK<br>,EELQSAPAAPSEVPVTTAVSLSPPK                                         |                                           |
| IPI00354163.6 | Q5DTW7 | 2810474O19Rik | Isoform 1 of Uncharacterized protein C12orf35 homolog | KYTYPNTNQVIDTNATK,QPYSESVR<br>PSGDGVQALVQNNQEK                                                                                    |                                           |
| IPI00752148.1 | A2AN41 | 2900010J23Rik | RIKEN cDNA 2900010J23, isoform CRA_a                  | HDMLDKEISQLIAEGYR,HISLLHEYNDI<br>KDVSQMLLGK,ELYPDFDLNLND,HISL<br>LHEYNDIK,SPQRPFPMIDENNDVSEE<br>ALSSDIK,PFPMIDENNDVSEEALSSDI<br>K |                                           |
| IPI00758006.1 | Q9D6E6 | 2900073G15Rik | Putative uncharacterized protein                      | FTDEEVDELYR,GNFNIEFTR,DGFID<br>KEDLHDMMLASM GK                                                                                    |                                           |
| IPI00109809.4 | Q9D1F5 | 3010026O09Rik | UPF0544 protein C5orf45 homolog                       | SVEEAVNGSEENAGPLQAEAGSQQ<br>APSKPLESR,LNLLQGQVSELSLR,SVE<br>EAVNGSEENAGPLQAEAGSQQAPS<br>K                                         |                                           |
| IPI00110456.2 | Q9CXL3 | 3110082I17Rik | Isoform 1 of Uncharacterized protein C7orf50 homolog  | PSAATLALAYLQGWAQK,ETASTLVQE<br>ASPELSPEER,VQTLPAKPSAATLALAY<br>YLQGWAQK,TSEAGPDKETASTLVQE<br>ASPELSPEER,VPDEHFPTLLDYLEGL<br>R     |                                           |
| IPI00316088.3 | A2TJV2 | 4432412L15Rik | Paralemmin-3                                          |                                                                                                                                   | GVVEVVWEGLGGR,VEEVVLEAI<br>GAR            |
| IPI00222228.5 |        | 4732456N10Rik | Putative uncharacterized protein                      | VELEAKVEALMDEINFLR,LALDIEIATY<br>R,DVDAAYMKNKVELEAK,VEALMDEIN<br>FLR,SLNLDSIIAEVK,AEAESWYQTK,S<br>RAEAESWYQTK,DVDAAYMKNK          |                                           |
| IPI00137643.4 | Q9D513 | 4930528F23Rik | Uncharacterized protein C16orf73 homolog              |                                                                                                                                   | ETVIFASDVR,TIITVNPDTPEANILLN<br>YIR       |
| IPI00221782.3 | Q8BGY7 | 4933403F05Rik | Uncharacterized protein C18orf19 homolog              |                                                                                                                                   | KQWLHLSAVQCLAK,GVNVIPFLE<br>VIGLPDSIVDILK |
| IPI00381415.6 | A2AG58 | A830080D01Rik | Isoform 1 of Uncharacterized protein CXorf23 homolog  | IDMSLDDFQNK,MSLGKPPQMSLADSL<br>R,WKPEHSFLPFQEK,LQNEDENI FHM<br>ASPTER,ADSFVTPDITLNER,SQYMPT<br>YTESAATYMEHER                      |                                           |
| IPI00808177.1 |        | AA623943      | hypothetical protein isoform 1                        |                                                                                                                                   | GFTCCDNECCPER,ILSIICTILPV<br>LFICALVK     |

|               |        |        |                                                          |                                                                                                                                                                                                |                                                                                                                                                                                                                                                                                                                                                                                                                                                                                                 |
|---------------|--------|--------|----------------------------------------------------------|------------------------------------------------------------------------------------------------------------------------------------------------------------------------------------------------|-------------------------------------------------------------------------------------------------------------------------------------------------------------------------------------------------------------------------------------------------------------------------------------------------------------------------------------------------------------------------------------------------------------------------------------------------------------------------------------------------|
| IPI00321308.4 | Q8BGQ7 | Aars   | Alanyl-tRNA synthetase, cytoplasmic                      |                                                                                                                                                                                                | MFVDEVVTGQECGVVLDK,NSSH<br>AGAFVIVTEEAIAK,VVSIQVVPVSE PVYTQDCPLAAAK,FINFFR,VVSIQV<br>LLDDPCGPAGSLTSVEFCGGTHL PVSELLDDPCGPAGSLTSVEFCGG<br>R,MALELLTQEFGIPVER,TIPGDT THLR,ITCLCQVPQNAANR,TIPGDT<br>AWLLYDYGFPVDLTGLIAEEK,N AWLLYDYGFPVDLTGLIAEEK,IQS<br>VGCLQEALQLATSFAQLR,IVAVT LGDCK,DIINEEEVQFLK,HNDLDDV<br>GAEAQK,GAMSTQQIK,TITVALAD GK,EIADLGEALATAVIPQWQK,NVG<br>GGRPDNTGR,GGYVLHIGTIYGNL CLQEALQLATSFAQLR,QIWQNLGL<br>K,DIINEEEVQFLK,EIADLGEALAT DEAR,IVAVTGAEAQK<br>AVIPQWQK,RIVAVTGAEAQK |
| IPI00648915.1 | A2A4P4 | Aarsd1 | Alanyl-tRNA synthetase domain containing 1               | GAGLFLLAGPAEAVETLGPR,SVIELDS<br>PSVTAEQVAIEQSVNQK,GAQADHFT<br>ESPLSPGSQVQVR,FDHMQQHSGQHL<br>ITAVADLLFGLK,VVTIEGVDSNMCCGT<br>HVSNLSDLQVIK,RAEAQALLQDYVST<br>QSAEE,EVLSGFHVLEDTLLFPEGGG<br>QPDDR |                                                                                                                                                                                                                                                                                                                                                                                                                                                                                                 |
| IPI00265219.4 | Q5SSE9 | Abca13 | Isoform 1 of ATP-binding cassette sub-family A member 13 |                                                                                                                                                                                                | TQNFSIDAADLWEEILGCLVPISNITT<br>QMDFLK,EGNFDVGGFFSHMLDQEH<br>LTDLPVVQR,YVNMNGSLQNSGLIS<br>FSEDSPCYTQDMNWK,TLLDAVELV<br>SDEPAIVPEALMCLTR,TSEIIEGFLF<br>LIK,SIYNLANYFALNLTNHLQNSSEV<br>FPHEILK                                                                                                                                                                                                                                                                                                     |
| IPI00111686.5 | Q3TZN9 | Abcc4  | Putative uncharacterized protein                         |                                                                                                                                                                                                | ILIIDEATANVDPR,FAQCTVLTIAH<br>R                                                                                                                                                                                                                                                                                                                                                                                                                                                                 |
| IPI00135646.1 | P55096 | Abcd3  | ATP-binding cassette sub-family D member 3               |                                                                                                                                                                                                | GIEGAQASPLVPGAGEIINTDNIK,<br>YLFNFIAAMPLISLVNNFLK                                                                                                                                                                                                                                                                                                                                                                                                                                               |
| IPI00322869.3 | P61222 | Abce1  | ATP-binding cassette sub-family E member 1               | LKPDEGGEVPLNVSYKPK,PLQIENI<br>IDQEVQTLGGELQR                                                                                                                                                   | IAIVNHDK,TQAIVCQQLDLTHLK,L<br>CIEVTPQSK,VAETANEEVKK,D<br>AYTHPQFVTDVMKPLQIENIIDQE<br>VQTLGGELQR,YDDPPDWQEIL<br>TYFR,AIIPQYVDQIPK,NVEDLS<br>GGELQR,PADVYLIDEPSAYLDSE<br>QR,FACAVVICIQK,LKPDEGGEVPL<br>VLNVSYKPK,EGINIFLDGYVPT<br>NLR,GTVGSILDR,VIVFDGVPSK,<br>RDPNNYRPR,VALALCLGK,PGEV<br>LGLVGTNGIGK,FLSQLEITFR,ILE<br>DDLK                                                                                                                                                                     |
| IPI00396671.1 | Q6P542 | Abcf1  | ATP-binding cassette sub-family F member 1               | KTFEELAVEDK,QQPPEPEWIGDGE<br>GTSPADK,AANAENDFSVSAEVSS<br>R,STLLLLLTGK,ILAGLGFPEMQNRP<br>TQK,NLDFGIDMSR,TFFEELAVEDK,<br>SFNLPYQDAR                                                              | SKPAAADSEGEEEEEDTAK,VVF<br>AELACR,STLLLLLTGK,GAVIVVS<br>HDAR                                                                                                                                                                                                                                                                                                                                                                                                                                    |

|               |          |        |                                                                      |                                                                                  |                                                                                                                                                                                                                                                                                                                                                    |
|---------------|----------|--------|----------------------------------------------------------------------|----------------------------------------------------------------------------------|----------------------------------------------------------------------------------------------------------------------------------------------------------------------------------------------------------------------------------------------------------------------------------------------------------------------------------------------------|
| IPI00116825.1 | Q99LE6   | Abcf2  | ATP-binding cassette sub-family F member 2                           |                                                                                  | EMPPSEK,LIQVVAQEIIWVCEK,L AHEDAEECEK,EVPIPEHIDIYHLTR, LLTGELLPTDGMIR,IPPPVIMVQNV LVDEEPQLTK,IPPPVIMVQNVSFK SFK ,YYTGNVDQYVK                                                                                                                                                                                                                        |
| IPI00471226.2 | Q9QYL7   | Abt1   | Activator of basal transcription 1                                   | IFGAPLPAESK,DYTEGWVEFR,NLLSA YGEVGR,FTWSHLSEHLAFER,YDLWN LK                      |                                                                                                                                                                                                                                                                                                                                                    |
| IPI00121833.3 | Q921H8   | Acaa1a | 3-ketoacyl-CoA thiolase A, peroxisomal                               |                                                                                  | VNPLGGAIALGHPLGCTGAR,IAQFL SGIPETVPLSTVNR,NTTPDELLSAV LTAVLQDVR                                                                                                                                                                                                                                                                                    |
| IPI00848443.1 | Q5SWU9-2 | Acaca  | Isoform 2 of Acetyl-CoA carboxylase 1                                |                                                                                  | VEVGTEVTDYR,LPELLLK,DIIVIG NDITYR,DPTLTDELLNILTELTQLS K,LGGIPVGVVAVETR,FGAYIVDG LR,TIQVENSHLILTGAGALNK,AIG IGAYLVR                                                                                                                                                                                                                                 |
| IPI00330747.2 | Q80XL6   | Acad11 | Acyl-CoA dehydrogenase family member 11                              |                                                                                  | TLRLADGPDEVHLSAIAKMELQD QAR,RGQEVLTR                                                                                                                                                                                                                                                                                                               |
| IPI00759881.1 | Q3ULL9   | Acad9  | very-long-chain acyl-CoA dehydrogenase VLCAD homolog precursor       |                                                                                  | VPVENVLGEVGGGFK,FSMGSVAV AGMLKK,ILLIFEGTNEILR,GVFPF PEVSQHELSEINQFVGPLEK VPVENVLGEVGGGFK,GVFPFPEVS QHELSEINQFVGPLEK                                                                                                                                                                                                                                |
| IPI00134961.1 | P45952   | Acadm  | Medium-chain specific acyl-CoA dehydrogenase, mitochondrial          |                                                                                  | ELNMGQR,AFAGDIANQLATDAV QIFGGYGFNTEYPVEK,TRPTVAA TRPTVAAGAVGLAQR,AFAGDIANQ GAVGLAQR,ANWYFLLAR,AFTGF LATDAVQIFGGYGFNTEYPVEK IVEADTPGIHIGK                                                                                                                                                                                                           |
| IPI00808206.1 | Q05D19   | Acin1  | Acin1 protein (Fragment)                                             | SGVSITIDDPVR,TGTLVEEAFWIDK,SL IPDIKPLAGQEAVVDLHADDSSR                            |                                                                                                                                                                                                                                                                                                                                                    |
| IPI00121136.6 | Q9JIX8   | Acin1  | Isoform 1 of Apoptotic chromatin condensation inducer in the nucleus | SGVSITIDDPVR,TGTLVEEAFWIDK,LL DDLFR                                              | PLHPPPPPPVQPPPHPR,ISNIVHIS NLVRPFTLGQLK,KPSISITTESLK                                                                                                                                                                                                                                                                                               |
| IPI00126248.3 | Q3V117   | Acly   | Putative uncharacterized protein                                     |                                                                                  | SFDELGEIIQSVYEDLVAK,LLVGV DEK,LGLVGVNLSLDGVK,MIVVL GEIGGTEEYK,LYRPGSVAYVSR, LGLVGVNLSLDGVK,GVTIIGPATVG GIK,IGNTGGMLDNILASK,DLVSSLT SGLLTIGDR,GVTIIGPATVGGIKPGC AK,VTPDTDWAHLLQDHPWLLSQ FK,TTGIPIHVFGTETHMTAIVGMAL SLVVKPDQLIK,LNTEDIKR,TIAIIA GHR,GQELIYAGMPITEVFK,SWLKP EGIPEALTR,DLVSSLTSGLLTIGD R,WGDIEFPPPFGR R,EHEVTIFVR,ILIIIGSIANFTNVA ATFK |
| IPI00116074.1 | Q99KI0   | Aco2   | Aconitate hydratase, mitochondrial                                   | DINQEYVNFATAGAK,NDANPETHAF VTSPEIVTALAIAGTLK,QGLLPLTFADP SDYNK,NAVTVQEFQVVPDTPAR | RLNRPLTLSEK,LTGSLSGWTSPK ,FKLEAPDADELPR,VAVPSTIHCD HLIEAQVGGEK,DINQEYVNFAT AGAK,DLEDLQILIK,LQLEPFDK DINQEYVNFATAGAK,SQFTITPGS WDGKDLEDLQILIK,SQFTITPGSE EQIR,LNRPLTLSEK QIR,NAVTVQEFQVVPDTPAR,IVYGH LDDPANQEIER,LNRPLTLSEK,LT I QGLK                                                                                                               |
| IPI00132958.1 | Q9CQR4   | Acot13 | Acyl-coenzyme A thioesterase 13                                      |                                                                                  | VTLVSAAPEK,TLAFASVDLTNK                                                                                                                                                                                                                                                                                                                            |

|               |        |        |                                                          |                                                                                                                                                               |                                                                                                                                                                                                                                                                                                     |
|---------------|--------|--------|----------------------------------------------------------|---------------------------------------------------------------------------------------------------------------------------------------------------------------|-----------------------------------------------------------------------------------------------------------------------------------------------------------------------------------------------------------------------------------------------------------------------------------------------------|
| IPI00556850.1 | Q561M1 | Acp1   | acid phosphatase 1, soluble isoform 1                    |                                                                                                                                                               | IELLGSYDPQK,SPIAEAVFR,SPIAE AVFRK                                                                                                                                                                                                                                                                   |
| IPI00411079.2 | Q5D071 | Acs14  | acyl-CoA synthetase long-chain family member 4 isoform 1 |                                                                                                                                                               | LSPEPWTPETGLVTDFAK,PTSDK PGSPYR,AKPTSDKPGSPYR                                                                                                                                                                                                                                                       |
| IPI00221528.1 | Q8BFZ3 | Actb12 | Beta-actin-like protein 2                                | TTGIVMDSGDGVTHTVPIYEGYALPHA ILR,SYELPDGQVITIGNER,VAPDEHPILLTEAPLNPK                                                                                           | HQGVMMVGMGQK,DLTDYLMK,TT GIVMDSGDGVTHTVPIYEGYALP HAILR,YSVWIGGSILASLSTFQQM WISK,RGILTLLK,SYELPDGQVITIGNER,VAPDEHPILLTEAPLNPK,DC YVGDEAQS                                                                                                                                                            |
| IPI00114593.1 | P68033 | Actc1  | Actin, alpha cardiac muscle 1                            | YPIEHGIITNWDMEK,SYELPDGQVITIGNER,IWHHTFYNELR,VAPEEHPTLLTEAPLNPK                                                                                               | DLTDYLMK,QEYDEAGPSIVHR,AVFPSIVGRPR,SYELPDGQVITIGNER,EITALAPSTMK,IWHHTFYNELR,AVFPSIVGR,DSYVVGDEAQS,K,AGFAGDDAPR                                                                                                                                                                                      |
| IPI00874482.1 | P63260 | Actg1  | Actin, cytoplasmic 2                                     | DLYANTVLSGGTTMYPGIADR,KDLYANTVLSGGTTMYPGIADR,TTGIVMDSGDGVTHTVPIYEGYALPHA ILR,SYELPDGQVITIGNER,IWHHTFYNELR,VAPEEHPVLLTEAPLNPK                                  |                                                                                                                                                                                                                                                                                                     |
| IPI00323660.1 | Q9Z2N8 | Act16a | Actin-like protein 6A                                    | VDFPTAIGVVLER,ELFQEMNIELIPPYMIASK,STGLILDGATHHTAIPVHDGYVLQQGIVK                                                                                               | VDFPTAIGVVLER,LIANNTTVER                                                                                                                                                                                                                                                                            |
| IPI00380436.1 | Q7TPR4 | Actn1  | Alpha-actinin-1                                          | FAIQDISVEETSAK,TINEVENQILTR                                                                                                                                   | LASDLLEWIR,LAILGIHNEVSK,LL ETIDQLYLEYAK,GYEEWLLNEIR,LVSIGAEIIVDGNV, RDQALTEE HAR,VGWEQLLTTIAR,LMLLLEVISGER,EGLLLWCQR,ASIHEAWTDGK,KHEAFESDLAAHQDR,ALDFIASK,FAIQDISVEETSAK,TINEVENQILTR                                                                                                               |
| IPI00118899.1 | P57780 | Actn4  | Alpha-actinin-4                                          | LVSIGAEIIVDGNNAK,KDDPVTNLNNAFEVAEK,DYETATLSDIK,AGTQIENIDEDFR,MLDAEDIVNTARPDEK,QLETIDQLHLEYAK,FAIQDISVEETSAK,TINEVENQILTR,LSGSNPYTTVTPQIINSK,MAPYQGPDAAPGALDYK | LASDLLEWIR,DGLAFNALIHR,LSGSNPYTTVTPQIINSK,NVNVQNFHISWK,ACLISLGYDVENDR,GYEWLLNEIR,LVSIGAEIIVDGNNAK,KDDPVTNLNNAFEVAEK,LMLLLEVISGER,EAILAIHK,VGWEQLLTTIAR,EGLLLWCQR,RDHALLEEQSK,SIVDYKPSLDLLEQQHQLIQEALIFDNK,ASIHEAWTDGK,KHEAFESDLAAHQDR,ALDFIASK,TINEVENQILTR,FAIQDISVEETSAK,VEQIAAIAQELNELDYDSHNVNTR |
| IPI00775849.2 |        | Actn4  | Alpha-actinin                                            | MLDAEDIVGTLRPDEK,LVSIGAEIIVDGNNAK,KDDPVTNLNNAFEVAEK,DYETATLSDIK,AGTQIENIDEDFR,FAIQDISVEETSAK                                                                  |                                                                                                                                                                                                                                                                                                     |

|               |          |        |                                                               |                                                   |                                                                                                                                                                                               |
|---------------|----------|--------|---------------------------------------------------------------|---------------------------------------------------|-----------------------------------------------------------------------------------------------------------------------------------------------------------------------------------------------|
| IPI00113895.1 | P61164   | Actr1a | Alpha-centractin                                              |                                                   | TLFSNIVLGGSTLFK,LLSEVKK                                                                                                                                                                       |
| IPI00177038.1 | P61161   | Actr2  | Actin-related protein 2                                       |                                                   | RLDIAGR,DLMVGDEASELR,GYAFN<br>HSADFETVR                                                                                                                                                       |
| IPI00115627.4 | Q99JY9   | Actr3  | Actin-related protein 3                                       |                                                   | TLTGTVIDSGDGVTHVIPVAEGYVIG<br>SCIK,LPACVVDCGTGYTK                                                                                                                                             |
| IPI00261467.6 | P03958   | Ada    | Adenosine deaminase                                           |                                                   | EGVVYVEVR,NIIGMDKPLSLPGFLA<br>K                                                                                                                                                               |
| IPI00395222.1 | Q99MU3   | Adar   | Isoform 1 of Double-stranded RNA-specific adenosine deaminase | ALQEEAASSADDQSGGANTDSLDES<br>MAPNK,ELRIPK         |                                                                                                                                                                                               |
| IPI00555004.3 | P28474   | Adh5   | Alcohol dehydrogenase class-3                                 |                                                   | SALEAAHK,VDEFVTGNLSFDQIN<br>QAFDLMHSGDSIR,VEPGSTCAV<br>FGLGGVGLAVIMGCK,AAVAWEA<br>GKPLSIEEIEVAPPK,FCLNPK,SIQ<br>EVLVEMTDGGVDYSFECIGNVK<br>IIGIDINK,AGDTVIPLYIPQCGECK,V<br>CLLGCGISTGYGAAVNTAK |
| IPI00126940.1 | P55264   | Adk    | Isoform Long of Adenosine kinase                              |                                                   | AGHYAASVIIR,VEAPQALSENVLF<br>GMGNPLLDISAVVDKDFLDK,YSL<br>KPNDQILAEDK,VFTLNLSAPFISQ<br>FFK                                                                                                     |
| IPI00265471.2 | Q3TMB8   | Adsl   | Putative uncharacterized protein                              |                                                   | ADAYFSPHSQLEHLLDPSSFTGR<br>,VLSQQAQAAVVK,ICLAEAFLTADTI<br>LNTLQNISEGLVVYPK<br>ADLPTLGFTHFQPAQLTTVGK,VLS<br>QQAQAAVVK                                                                          |
| IPI00135969.2 | P46664   | Adss   | Adenylosuccinate synthetase isozyme 2                         |                                                   | RCGWLDLVSLK,VGIGAFPTEQDNE<br>IGELLQTR,FIEDELQIPVK,VVDLLAQ<br>DADIVCR,ELPVNAQNYVR,VEVQYK<br>,LDGETIPHFANQEVLNK                                                                                 |
| IPI00467786.2 | Q8C095   | Aen    | unnamed protein product                                       | DTTYVPNLLSQPSSLIR,YIRPEMIVDY<br>R,CVAIDCEMVGTPQGR |                                                                                                                                                                                               |
| IPI00229454.1 | P63002-2 | Aes    | Isoform 2 of Amino-terminal enhancer of split                 | QVTAPELNSIIR,IKDEFQLLQAQYHSLK                     |                                                                                                                                                                                               |
| IPI00170357.5 | Q8JZQ2   | Afg3l2 | AFG3-like protein 2                                           |                                                   | HFEQAIER,VHLRPLK,VALLLLEK,<br>HLSDAINEK,KEPQPSGPQPSGG<br>AGGGGGK                                                                                                                              |
| IPI00223818.2 | A2AL50   | Agps   | Alkylglycerone phosphate synthase                             |                                                   | TSINPSEAPPSIVNEDFLQELK,IL<br>WVDENNLTAHVEAGITGQDLER,<br>GISDPLTVFEHTEAAAR,IRPTPEY<br>QK,YPLSGLVLPRTL,RASAAGAS<br>PAATPAAPESGTIPK                                                              |
| IPI00122594.4 | Q8CJF7   | Ahctf1 | Protein ELYS                                                  |                                                   | NGVSLFNPK,SPLCLLSSSLPSSQ<br>FK                                                                                                                                                                |

|               |          |          |                                                                             |                                                                                                                                                   |                                                                                                                                                                                                                         |                                                                                                                                                                                                             |
|---------------|----------|----------|-----------------------------------------------------------------------------|---------------------------------------------------------------------------------------------------------------------------------------------------|-------------------------------------------------------------------------------------------------------------------------------------------------------------------------------------------------------------------------|-------------------------------------------------------------------------------------------------------------------------------------------------------------------------------------------------------------|
| IPI00230440.6 | P50247   | Ahcy     | Adenosylhomocysteinase                                                      |                                                                                                                                                   | VADIGLAAWGR,YPQLLSGIR,GE<br>TDEEYLWCIEQTLHFK,GCAQALR<br>,KLDEAVAEHLGK,DGPLNMILD<br>DGGDLTNIHTK,GISEETTTGVH<br>NLYK,VIITEIDPINALQAAMEGYEV<br>TTMDEACK,VAVVAGYGDVVK,V<br>PAINVNDVSVTK,IILAEGR,ALDIAE<br>NEMPLMR,VNIKPQVDR | LDEAVAEHLGK,VAVVAGYGDVVK<br>,YPQLLSGIR,YPVGVHFLPK,VPAIN<br>VNDVSVTK,KLDEAVAEHLGK,DGPL<br>NMILDDGGDLTNIHTK,VNIKPQVD<br>R,GISEETTTGVHNLTK,VIITEIDPIN<br>ALQAAMEGYEVTTMDEACK,AGIPV<br>FAWK,WSSCNIFSTQDHAAAAIAK |
| IPI00553798.2 |          | Ahnak    | AHNAK nucleoprotein isoform 1                                               | GGVDVILPNVEGK,LDIDTPDIDIHGPE<br>GK,GPQITGPSLEGDLGLK,VDIDTPQV<br>DVHGPDLK,KLEGDLK,ISMPEIDLNLK<br>GPKLK,DIDITSPEFMK,AEQPEVDVNL<br>PK,VDIETPNLEGLTGP | VDIDVPDVPDVHGPDWHLK,AEQ<br>EVDVNLPK,ADIDVSGPK,VDIDVP<br>DVNIEGPK                                                                                                                                                        | GAFDGSVPK,VEANVQAGAGEGK,F<br>SMPGFK,VDIDVPDVNIEGPEGK,AE<br>GPEVDVNLPK,ELLLPNWQGGSGH<br>GLTIAQR,VDIDVPDVNIEGPK                                                                                               |
| IPI00153740.1 | Q8BK64   | Ahsa1    | Activator of 90 kDa heat shock protein<br>ATPase homolog 1                  | VFTTQELVQAFTHAPAALADR,ETFL<br>TSPEELR,GHVEIPNLSDENSVDEVEI<br>SVSLAK,FHMVDGNVTGEFTDLVPEK                                                           | VENEEGKCEVTEVVK,VFTTQELV<br>QAFTHAPAALADR,EAVGIYISTL<br>K,GHVEIPNLSDENSVDEVEISVS<br>LAK,SWPEGHFATITLTFIDK                                                                                                               |                                                                                                                                                                                                             |
| IPI00828748.1 | A2ALW0   | AI314180 | Novel protein containing 10 HEAT<br>domains                                 |                                                                                                                                                   | LIPALLESLSVLEPQVNLNLSLR,V<br>NDVVPWVLDVILNK                                                                                                                                                                             |                                                                                                                                                                                                             |
| IPI00400395.1 | Q8BGQ1   | AI413782 | Isoform 1 of Uncharacterized protein<br>C14orf133 homolog                   | DYSNDWSLSDTVQR,AFTFDEDEDEL<br>SQLK,AWNDVDALFTTK,TRPGSFQSL<br>SDALSPTAK                                                                            |                                                                                                                                                                                                                         |                                                                                                                                                                                                             |
| IPI00129577.1 | Q9Z0X1   | Aifm1    | Apoptosis-inducing factor 1,<br>mitochondrial                               |                                                                                                                                                   | KVVHLDVR,KVETDHIVTAVGLEP<br>NVELAK,AIASATEGGSVPQIR,GV<br>IFYLR,SITVIGGGFLGSELACALG<br>R,KSQASGIEVIQLFPEK,VNAELQ<br>AR                                                                                                   |                                                                                                                                                                                                             |
| IPI00132194.3 | Q3UZG4   | Aimp1    | small inducible cytokine subfamily E,<br>member 1                           | QELILAEIHNGVEQVR,ITFDAPGEPD<br>KELNPK,VEILAPPNGSVPGDR,AQTM<br>ANSGIK,EIEELKQELILAEIHNGVEQVR<br>,GAEADQIIEYLK,TVVSGLVNHVPLEQ<br>MQNR               |                                                                                                                                                                                                                         | IWEIQPDLHTNAECVATYK,TVVS<br>GLVNHVPLEQMQNR,GAEADQIIEY<br>LK,EIEELK                                                                                                                                          |
| IPI00153103.3 | Q8R010   | Aimp2    | Aminoacyl tRNA synthetase complex-<br>interacting multifunctional protein 2 | TTSPATDAGHVQETSEPSLQALSR,F<br>LFSLFGQK                                                                                                            | MIHTPADLDVNTILQADEPTTLA<br>TNTLDLNSVLGK,SCENLAPFSTA<br>LQLLK,VLSTVHTHSSVK                                                                                                                                               | SPWLVGNELTVADVVLWSVLQQTG<br>GSSGAAPTNVQR,MIHTPADLDVT<br>NILQADEPTTLATNTLDLNSVLGK,S<br>CENLAPFSTALQLLK,VLSTVHTHSS<br>VK                                                                                      |
| IPI00125794.6 | A2ALI5   | Ajap1    | Adherens junction-associated protein 1                                      |                                                                                                                                                   |                                                                                                                                                                                                                         | GVTESLDPWKR,MWIIQQLGLSSM<br>SIR,TTVATTTTTTAASTATAMLTQT<br>K                                                                                                                                                 |
| IPI00750256.2 | Q9R0Y5-2 | Ak1      | Isoform 2 of Adenylate kinase isoenzyme<br>1                                | RLETYYNATEPVISFYDK,LETYYNATE<br>PVISFYDK                                                                                                          |                                                                                                                                                                                                                         | VNAEGTVDTVFSEVCTYLDLTK,GE<br>LVPLDTVLDMLR                                                                                                                                                                   |
| IPI00648318.1 | Q9WTP6   | Ak2      | Isoform 1 of Adenylate kinase 2,<br>mitochondrial                           |                                                                                                                                                   | GIHCAIDASQTPDIVFASILAAFSK,<br>AVLLGPPGAGK,LVSDVMVELIE<br>K                                                                                                                                                              |                                                                                                                                                                                                             |



|               |        |        |                                         |                                                                                                                                                                                                                                                                                                                                                                                                                                                                                                                                                                                                                                                                                                                                                                                                                                                                                                                                                                                                                                                                                                                                                                                                                                                                                                                                                                                                                                                                                                                                                                                                                                                                                                                        |
|---------------|--------|--------|-----------------------------------------|------------------------------------------------------------------------------------------------------------------------------------------------------------------------------------------------------------------------------------------------------------------------------------------------------------------------------------------------------------------------------------------------------------------------------------------------------------------------------------------------------------------------------------------------------------------------------------------------------------------------------------------------------------------------------------------------------------------------------------------------------------------------------------------------------------------------------------------------------------------------------------------------------------------------------------------------------------------------------------------------------------------------------------------------------------------------------------------------------------------------------------------------------------------------------------------------------------------------------------------------------------------------------------------------------------------------------------------------------------------------------------------------------------------------------------------------------------------------------------------------------------------------------------------------------------------------------------------------------------------------------------------------------------------------------------------------------------------------|
| IPI00123709.1 | Q9WTQ5 | Akap12 | Isoform 1 of A-kinase anchor protein 12 | <p>TLVHTVSVVAIDGTR,QAQSSSTEIPLQA<br/> ESGQGTEEEAAK,ASEMITTLAVESAS TLVHTVSVVAIDGTR,ASEMITTLA<br/> VK,VDEEEGEKTEPAPAEQEPAEGT VESASVK,AEVGQEGEAGQFDGE<br/> DQAR,SATLSSTESTASGMQDEVR,DE K,EDSQVPATQTLQR,EQEAKEKVD<br/> GEGAEASVGAGDHQEPGVETVGESAE EEEGEKTEPAPAEQEPAEGTD<br/> SK,EQEAKEKVDDEEEGEKTEPAPAEQ QAR,DVLEPTQALAAGAVPILAK,I<br/> EPAEGTDQAR,HPEGIVSEVEMLSSQE VQSVIQTAVDQFAR,VKEDSQVP<br/> R,AEDSGAEQLASEIEPSR,EMAASST ATQTLQR,ALEKVEEVEEDSEVLA<br/> VVEDITK,ALGSLEGSPSLPDQDK,DVL TEK,VELPLEDQVGDLEALSEK,A<br/> EPTQALAAGAVPILAK,IVQSVIQTAVD QENVLPQLK,AEPEILELESK,KD<br/> QFAR,VELPLEDQVGDLEALSEK,GGG EGEGAEASVGAGDHQEPGVETV RLVTPRK,AQENVELPQLK,DITAEA<br/> GGDEEPGEYQHIQTESPEADEQK,LA GESASK,KASSSDDEGGPR,TEA TPALAQTLPGGK,QTQAVLQAVADK<br/> ETQEVQEAEPVEELMK,RGGGGGDE HQEVVAEVHSTVEK,EHAADGP ,ADCIEVQVQSSDTPVTQTTEAVKK,<br/> EPGEYQHIQTESPEADEQK,QSQVTE QHQSLAK,GQGGAEVEGDVVVE HPEGIVSEVEMLSSQER,DVLEPTQ<br/> EEAAAQTEGPSTPSSFPAQEEHR,K GSGESLPPEK,AEADASGNLTK,A ALAAGAVPILAK,IVQSVIQTAVDQFA<br/> DEGEGAEASVGAGDHQEPGVETVGE EDSGAEQLASEIEPSREESWVSI R,EHAADGPQHQSLAK,AEADASGN<br/> SASK,EKEPTKPLESPTSPVSNETTSS K,LPLQCK,AQTEEDDLQEPK,VEE LTK,VELPLEDQVGDLEALSEK<br/> FK,SPEQPAESDTPSELELSGHGPAAE VEEDSEVLATEK,DITAEATPALA<br/> ASGAAGDPADADPATK,GQGGAEVEG QTLPGGK,TEQASEEHEQETAAP<br/> DVVVEGSGESLPPEK,AEDSGAEQLA EHEGTHPK,ATTCQVIK,DEKEHA<br/> SEIEPSREESWVSIK,VEEVEEDSEVLA ADGPQHQSLAK,SDTVQLLTVK,S<br/> TEK,AEPEILELESKSNKIVQSVIQTAVD DEDNKPDPAGPDAAGK,GAVYVSE<br/> QFAR,DITAEATPALAQTLPGGK,FFTH ELSK,EVCVSGGDHTQLTDLSP<br/> GWAGWR,GAVYVSEELSK,EPTKPLE EK,GPSEAPQEAEEGATSDGE<br/> SPTSPVSNETTSSF,DAHDDIVTSEV K,DAHDDIVTSEVDFTEAVTAAE<br/> DFTSEAVTAAETTEALR,QAQSSSTEIPL TTEALR<br/> QAESGQGTEEEAAKDGEENR</p> |
|---------------|--------|--------|-----------------------------------------|------------------------------------------------------------------------------------------------------------------------------------------------------------------------------------------------------------------------------------------------------------------------------------------------------------------------------------------------------------------------------------------------------------------------------------------------------------------------------------------------------------------------------------------------------------------------------------------------------------------------------------------------------------------------------------------------------------------------------------------------------------------------------------------------------------------------------------------------------------------------------------------------------------------------------------------------------------------------------------------------------------------------------------------------------------------------------------------------------------------------------------------------------------------------------------------------------------------------------------------------------------------------------------------------------------------------------------------------------------------------------------------------------------------------------------------------------------------------------------------------------------------------------------------------------------------------------------------------------------------------------------------------------------------------------------------------------------------------|

|               |  |       |         |                                                                                                                                                                                                 |
|---------------|--|-------|---------|-------------------------------------------------------------------------------------------------------------------------------------------------------------------------------------------------|
| IPI00649060.1 |  | Akap2 | Protein | <p>GPSQPPTAAQPSGPVNMEETRPEGG<br/> YFSK,DEDHGILDQFSR,AVLTVVKDED<br/> HGILDQFSR,STASLLATQESDVMVGP<br/> FK,TIEEQLDEEHLESHR,TLSMIEEIR,<br/> LWAEDGEFTSAR,DGEFTLTLTK,SVN<br/> VSLTQEELDSGLDELSVR</p> |
|---------------|--|-------|---------|-------------------------------------------------------------------------------------------------------------------------------------------------------------------------------------------------|

|               |        |       |                           |                                                |
|---------------|--------|-------|---------------------------|------------------------------------------------|
| IPI00321739.1 | Q9DBR0 | Akap8 | A-kinase anchor protein 8 | <p>TVEFLQEYIINR,EETPEEVAEVLAEVI<br/> TAAVK</p> |
|---------------|--------|-------|---------------------------|------------------------------------------------|

|               |        |        |                               |                                                                                                |
|---------------|--------|--------|-------------------------------|------------------------------------------------------------------------------------------------|
| IPI00466128.3 | Q9JII6 | Akr1a4 | Alcohol dehydrogenase [NADP+] | <p>GLEVTAYSPLGSSDR,ILQNIQVDFDTF<br/> SPEEMK,HPDEPVLLLEPVVLAELK</p> <p>HHPEDVEPALR,HALSAGYR</p> |
|---------------|--------|--------|-------------------------------|------------------------------------------------------------------------------------------------|

|               |        |        |                  |                                                                                                                                                                                                                                                                                                                                                                                                                                                                  |
|---------------|--------|--------|------------------|------------------------------------------------------------------------------------------------------------------------------------------------------------------------------------------------------------------------------------------------------------------------------------------------------------------------------------------------------------------------------------------------------------------------------------------------------------------|
| IPI00223757.4 | P45376 | Akr1b3 | Aldose reductase | <p>TTAQLVIR,VDFEVSSEDMATLLSYNR WPTGFK,MPTLGLGTWK,YKPAV TTAQVLIR,TLSDLQLDYLDLYLIHWP<br/> ,TIGVSNFNPLQIER,PGPDYFPLDASG NQIECHPYLTQEK,VAIDLGYR,LIE TGFK,MPTLGLGTWK,YKPAVNQIE<br/> NVIPSDTDFVDTWTAMEQLVDEGLVK, YCHSK,HIDCAQVYQNEK,SPPGQ YQNEK,ILNKPGLK,SPPGQVTEAVK<br/> GIVVTAYSPLGSPDRPWAKPEDPSLL VTEAVK,EVGVALQEK,RQDLFIVS ,EVGVALQEK,TIGVSNFNPLQIER,P<br/> EDPR K,TIGVSNFNPLQIER,GIVVTAYSP GPDYFPLDASGNVIPSDDTDFVDTW<br/> LGSPDRPWAKPEDPSLLEDPR TAMEQLVDEGLVK</p> |
|---------------|--------|--------|------------------|------------------------------------------------------------------------------------------------------------------------------------------------------------------------------------------------------------------------------------------------------------------------------------------------------------------------------------------------------------------------------------------------------------------------------------------------------------------|

|               |        |          |                                                            |                                                                                                                                       |                                                                                                                                                                                                                                                                                                                                                                                                                                               |                                                                                                                                                                                                                                                                                                   |
|---------------|--------|----------|------------------------------------------------------------|---------------------------------------------------------------------------------------------------------------------------------------|-----------------------------------------------------------------------------------------------------------------------------------------------------------------------------------------------------------------------------------------------------------------------------------------------------------------------------------------------------------------------------------------------------------------------------------------------|---------------------------------------------------------------------------------------------------------------------------------------------------------------------------------------------------------------------------------------------------------------------------------------------------|
| IPI00830240.1 | Q91WR5 | Akr1c21  | Aldo-keto reductase family 1 member C21                    | NFNRYR                                                                                                                                |                                                                                                                                                                                                                                                                                                                                                                                                                                               |                                                                                                                                                                                                                                                                                                   |
| IPI00129350.1 | Q9Z110 | Aldh18a1 | Isoform Long of Delta-1-pyrroline-5-carboxylate synthetase |                                                                                                                                       | GPVGLEGLLTTK,GQDHVVSDFS<br>EHGSLK,TDLLIVLSDVEGLFDSPP<br>GSDDAK,ILHLLTQEALSIHGVK,A<br>EIIHNLADLLTDQR,AEIINHLADLL<br>TDQREEILLANK,YGSSHTDVIVTE<br>NEK,EAIQLVNTR,FGLGAEVIGIST<br>SR,IIDLIIIPR,TPLFDQIIDMLR,FAS<br>YLTFSPSEVK,LIDIFYPGDQQSVT<br>FGTK,VSGHVITDIVEGK                                                                                                                                                                                |                                                                                                                                                                                                                                                                                                   |
| IPI00111218.1 | P47738 | Aldh2    | Aldehyde dehydrogenase, mitochondrial                      |                                                                                                                                       | YGLAAAVFTK,VAFTGSTEVGHLI<br>QVAAGSSNLK,TIEEVVGR,VAEQ<br>TPLTALYVANLIK,LLCGGAAAD<br>R,LGPALATGNVVMK,GYFIQPT<br>VFGDVK,TFVQENVYDEFVER                                                                                                                                                                                                                                                                                                           | VAFTGSTEVGHLIQVAAGSSNLK,E<br>EIFGPVMQILK,RVTLELGGK,LLCG<br>GGAAADR,EAGFPVGVNIVPGFPG<br>TAGAAIASHEGVDK,GYFIQPTVFGD<br>VK                                                                                                                                                                           |
| IPI00856379.1 | A6ZI44 | Aldoa    | Fructose-bisphosphate aldolase                             |                                                                                                                                       | KDGADFAK,RLQSIGTENTEENR,<br>AAQEEYIK,GILAADESTGSIK,YT<br>PSGQSGAAASESLFISNHAY,ALQ<br>KDGADFAK,DGADFAK,AAQEEYIK,GIL<br>AADESTGSIK,ALQASALK,YTPSGQS<br>GAAASESLFISNHAY,FSNEEIAMATVT<br>ALR,VLAAVYK,GGVVGK,AAQEEYIKR<br>,IGEHTPSALAIMENANVLAR,GVVPLA<br>GTNGETTQGLDGLSER,TVPPAVTGV<br>TFLSGGQSEEEASINLNAINK,ELSDIA<br>HR,QLLLTADDR,RLQSIGTENTEENRR<br>NSLACQGK,ALSDHHVYLEGTLK<br>PNMVTPGHACTQK,RLQSIGTEN<br>TEENRR,ADDGRPPQVIK,LQSIG<br>TENTEENR | AAQEEYIK,GILAADESTGSIK,ALQ<br>ASALK,FSNEEIAMATVTALR,VLA<br>AVYK,AAQEEYIKR,LQSIGTENTE<br>ENRR,IGEHTPSALAIMENANVLA<br>R,YASICQNGIVPIPEILPDGD<br>HDLK,GVVPLAGTNGETTQGLD<br>GLSER,TVPPAVTGVTFLSGGQS<br>SGGQSEEEASINLNAINK,ELSDIAH<br>R,QLLLTADDR,ALANSLACQGK,AD<br>DGRPPQVIK,PPQVIK,LQSIGTEN<br>TEENR |
| IPI00263333.1 | Q8K371 | Amotl2   | Isoform 1 of Angiomotin-like protein 2                     | GPPPQYPHAVMAQETAAVTDPR,DGS<br>TQTDGPADNTSACLASEPDGLLG CNS<br>SQR                                                                      |                                                                                                                                                                                                                                                                                                                                                                                                                                               |                                                                                                                                                                                                                                                                                                   |
| IPI00229274.1 | Q8CFA2 | Amt      | Aminomethyltransferase, mitochondrial                      |                                                                                                                                       | KQQMTVVSK,AHSPILNTEGTVIGTV<br>TSGCPSPSLK                                                                                                                                                                                                                                                                                                                                                                                                      |                                                                                                                                                                                                                                                                                                   |
| IPI00153118.1 | Q8R034 | Anapc13  | Anaphase-promoting complex subunit 13                      | WTDLALQGLHENVPPAGN,ILDLIDDA<br>WR                                                                                                     |                                                                                                                                                                                                                                                                                                                                                                                                                                               |                                                                                                                                                                                                                                                                                                   |
| IPI00465535.1 | Q99NH0 | Ankrd17  | Isoform 1 of Ankyrin repeat domain-containing protein 17   |                                                                                                                                       | LTSSVSCALDEAAAALTR,ESALT LA<br>CYK                                                                                                                                                                                                                                                                                                                                                                                                            |                                                                                                                                                                                                                                                                                                   |
| IPI00172197.2 | Q8K298 | Anln     | Actin-binding protein anillin                              | TDASNYYYLIMLK,DLLYSIDAYR,ASSP<br>VTAATFITENR,SSLHSSVMASPGGLG<br>AVR,KDPSSNAAHGPLLSASVSSVK,<br>QAKPPAPAAISESVAAPAALLSADR,IT<br>LFLEEEK | VPFLSPLEGHICLK,GLNSGSEASAT<br>SSVK,DLLYSIDAYR,PTLSQGAQPK,<br>LANLAATICSWEDDVSHSSAK                                                                                                                                                                                                                                                                                                                                                            |                                                                                                                                                                                                                                                                                                   |

|               |          |        |                                                                            |                                                                                                 |                                                                                                                                                                                                                                                                     |                                                                                                                                                              |
|---------------|----------|--------|----------------------------------------------------------------------------|-------------------------------------------------------------------------------------------------|---------------------------------------------------------------------------------------------------------------------------------------------------------------------------------------------------------------------------------------------------------------------|--------------------------------------------------------------------------------------------------------------------------------------------------------------|
| IPI00756965.1 | A2AHL1   | Ano3   | Isoform 1 of Anoctamin-3                                                   |                                                                                                 | MEVINPITGKPEPHQPSSDKVTR,R<br>SILTYTWDLIEWEEEEETLRPQFEA<br>K                                                                                                                                                                                                         |                                                                                                                                                              |
| IPI00314736.3 | O35381   | Anp32a | Acidic leucine-rich nuclear phosphoprotein 32 family member A              | ELVLDNCK,HLNLSGNK,KLELSE<br>NR,IYLELR,ISGDLEVLAEK,IEGLT<br>DEFEELEFLSTINVGLTSISNLPK             | HLNLSGNK,KLELSENR,ISGDLEVL<br>AEK                                                                                                                                                                                                                                   |                                                                                                                                                              |
| IPI00113536.3 | Q9EST5-2 | Anp32b | Isoform 2 of Acidic leucine-rich nuclear phosphoprotein 32 family member B | SLDLFGCEVTNR,DISTLEPLKR,E<br>LVLDNCK,RLDCLK,LAEELPSLTH<br>LNLSGNLTK,KLELSENR,IHLELR,<br>IFGGLDR | SLDLFGCEVTNR,RLDCLK,LAEELP<br>SLTHLNLSGNLTK,KLELSENR,IHLE<br>LR,IEGLTDEFVNLEFLSLISVGLFSV<br>SDLPK,LLPQLSYLDGYDR,IFGGLD<br>R                                                                                                                                         |                                                                                                                                                              |
| IPI00130016.1 | P97822   | Anp32e | Isoform 1 of Acidic leucine-rich nuclear phosphoprotein 32 family member E |                                                                                                 | DLSTVEALQNLK,SLDLFNCEITNLE<br>DYR                                                                                                                                                                                                                                   |                                                                                                                                                              |
| IPI00652811.1 | Q3US43   | Anxa1  | Putative uncharacterized protein                                           |                                                                                                 | GGPGSAVSPYPSFNVSSDVAALHK,<br>FLENQEYEVQAVK                                                                                                                                                                                                                          |                                                                                                                                                              |
| IPI00468203.3 | P07356   | Anxa2  | Annexin A2                                                                 | SALSGHLETVILGLLK,GVDEVTIVNILT<br>NR,RAEDGSVIDYELIDQDAR                                          | GDLENAFLNLVQCIQNKPLYFADR,<br>SALSGHLETVILGLLK,GLGTDEDSL<br>EIICSR                                                                                                                                                                                                   |                                                                                                                                                              |
| IPI00554894.2 | P14824   | Anxa6  | Annexin A6                                                                 |                                                                                                 | LMLAVVK,TTGKPIEASIR,TLIEILA<br>TR,SEISGLAR,GIGTDEATIIDIVT<br>HR,ILISLATGNR,MLVVLLQGTR,D<br>LIEDLKYELTGK,IMVSRSELDMLD<br>IREIFR,DAFVAIVQSVK,SELDMLD<br>IREIFR,SLEDALSSDTSGHFR                                                                                        |                                                                                                                                                              |
| IPI00648683.3 | Q8CC13   | Ap1b1  | Putative uncharacterized protein                                           |                                                                                                 | KPTETQELVQQVLSLATQDSDNP<br>DLR,NINLIVQK,LGAPISGLSDF<br>DLTSGVGTLSGSYVAPK,LAPPLV<br>TLLSAEPELQYVALR,DLDDYATLL<br>K,EYATEVDVDFVR,YNDPIYVK,L<br>ASQANIAQVLAELK,LSHANSVV<br>LSAVK,VNYVVQEAIIVIK,AAMIWI<br>VGEYAER,RPEILK,NSFGLAPAAP<br>LQVHVPLSPNQTVIEISLPLNTVGS<br>VLK | LGAPISGLSDFDLTSGVGTLSGS<br>YVAPK,LAPPLVTLLSAEPELQYVAL<br>R,KVIASMTVGK,LASQANIAQVLAEL<br>K,KLVYLYLMNYAK,RPEILK,NSFGL<br>APAAPLQVHVPLSPNQTVIEISLPLN<br>TVGSVLK |
| IPI00224151.5 | Q3UKX8   | Ap1g1  | Putative uncharacterized protein                                           |                                                                                                 | TFQLQLLSPSSSVVPAFNTGTITQ<br>VIK,VVSIYSSIDVELQQR,VLTTA<br>GSYVR                                                                                                                                                                                                      | AMELSFALVNGNINR,TFQLQLLSPS<br>SSVPAFNTGTITQVIK,NVGNAILYE<br>TVLTIMDIK                                                                                        |
| IPI00108780.7 | P17426   | Ap2a1  | Isoform A of AP-2 complex subunit alpha-1                                  |                                                                                                 | LLQCYPPPEDAAVK,ACNQLGQFLQ<br>HR,TSVQFQNFPLTVVHPGDLQTQL<br>AVQTK                                                                                                                                                                                                     |                                                                                                                                                              |

|               |          |       |                                                                                         |                                                                                |                                                                                                                                                                                                                                                                                                                                                                                |
|---------------|----------|-------|-----------------------------------------------------------------------------------------|--------------------------------------------------------------------------------|--------------------------------------------------------------------------------------------------------------------------------------------------------------------------------------------------------------------------------------------------------------------------------------------------------------------------------------------------------------------------------|
| IPI00753468.2 | Q8C2J5   | Ap2a2 | adaptor protein complex AP-2, alpha 2 subunit                                           | IVINR                                                                          | ALLLSTYIK, GLAVFISDIR, VGGYIL<br>GEFGNLIAGDPR, VIQIVINR, LPITL<br>NK, ACNQLGQFLQHR, IIGFGSALL<br>EEVDPNPANFVGAGIIHTK                                                                                                                                                                                                                                                           |
| IPI00378063.1 | Q9DBG3-2 | Ap2b1 | Isoform 2 of AP-2 complex subunit beta                                                  |                                                                                | VNYVVQEAIIVIR, NINLIVQK, LTN<br>GIWILAELR, LAPPLVTLLSGEPEV<br>QYVALR, KPSETQELVQQVLSLAT<br>QDSDNPDLR, LASQANIAQVLAEL<br>K, YNDPIYVK, EYATEVDVDFVR, L<br>SHANSVVLSAVK, AAMIWIVGEY<br>AER, RPEILK, APEVSQYIYQVYDSI<br>LK<br>ECHLNADTVSSK, LAPPLVTLLSGEP<br>EVQYVALR, NSFGVIPSTPLAIHTPL<br>MPNQSIDVSLPLNTLGPVMK, LASQ<br>ANIAQVLAELK, KLVYLYLMNYAK, R<br>PEILK, APEVSQYIYQVYDSILK |
| IPI00116356.5 | P84091   | Ap2m1 | AP-2 complex subunit mu                                                                 |                                                                                | VNVIHAR, WARPPISMNFVFPFAPS<br>GLK                                                                                                                                                                                                                                                                                                                                              |
| IPI00118022.1 | P62743   | Ap2s1 | AP-2 complex subunit sigma                                                              |                                                                                | LIEEVHAVVTVR, FILIQNR                                                                                                                                                                                                                                                                                                                                                          |
| IPI00224152.5 | P28352   | Apex1 | DNA-(apurinic or apyrimidinic site) lyase                                               | EAAGEGPVLYEDPPDQK, QGFGELLQ<br>AVPLADSF, LPAELQELPGLTHQYWS<br>APSDK            | KPLVLCGDLNVAHEEIDL, LPAEL<br>QELPGLTHQYWSAPSDK, VSYGI<br>GEEHDQEGR<br>NAGFTPQER, QGFGELLQAVPLADS<br>FR, LPAELQELPGLTHQYWSAPSDK<br>, KGLDWVK                                                                                                                                                                                                                                    |
| IPI00399961.2 | Q3UYQ4   | Api5  | Putative uncharacterized protein                                                        |                                                                                | NYGILADATEQVGQHK, GTLGGLF<br>SQILQGEDIVR, VADILTQLLQTTDD<br>SAEFNLVNNALLSIFK<br>GTLGGLFSQILQGEDIVR, VADILTQL<br>LQTDDSAEFNLVNNALLSIFK, ITNNI<br>NVLIK, DLFHIPPSYK, ELPQFATGEN<br>LPR                                                                                                                                                                                           |
| IPI00330933.6 | Q9WVQ5   | Apip  | APAF1-interacting protein                                                               | YDDMLVVPIIENTPEEK, AAVMATLLFP<br>GQEFK                                         |                                                                                                                                                                                                                                                                                                                                                                                |
| IPI00625950.2 | Q6PK77   | Aprt  | adenine phosphoribosyltransferase                                                       |                                                                                | SFPDFPIPGVLF, LPGPTVSASY<br>SLEYGK, LGPIFFSLLQYD, GFLF<br>GPSLAQELGVGCVLIR, IDYIAGLD<br>SR, LLASHLK, AEVVECVSLVELTS<br>LK, VVIVDDLLATGGTMFAACDLL<br>HQLR<br>SFPDFPIPGVLF, LPGPTVSASYSL<br>EYGK, GFLFGPSLAQELGVGCVLIR,<br>LLASHLK, AELEIQK                                                                                                                                      |
| IPI00377288.3 | Q4LDD4   | Arap1 | Isoform 1 of Arf-GAP with Rho-GAP domain, ANK repeat and PH domain-containing protein 1 |                                                                                | KCGQTSK, EELLPSVSPR, SLIPDLP<br>LHPMDELPGGPTPITPVK                                                                                                                                                                                                                                                                                                                             |
| IPI00849044.2 | Q91W48   | Arcn1 | Putative uncharacterized protein                                                        | NSNILEDLETLR, IEGLLAAPFK, LYMVLI<br>TTK, LFTAESLIGLK, TSEATKVHAPPIN<br>MESVHMK |                                                                                                                                                                                                                                                                                                                                                                                |
| IPI00465765.2 | Q9QY36   | Ard1a | N-terminal acetyltransferase complex ARD1 subunit homolog A                             | MEEDPDDVPHGHITSLAVK, DLTQMAD<br>ELR, AALHLYSNTLNFQISEVEPK                      |                                                                                                                                                                                                                                                                                                                                                                                |
| IPI00758413.2 | Q3V4D5   | Ard1a | N-acetyltransferase ARD1 homolog (S. cerevisiae), isoform CRA_b                         | MEEDPDDVPHGHITSLAVK, AALHLYS<br>NTLNFQISEVEPK                                  | YVSLHVR, GQAHGSGGLGEQSGEQ<br>R                                                                                                                                                                                                                                                                                                                                                 |
| IPI00221613.5 | P84078   | Arf1  | ADP-ribosylation factor 1                                                               |                                                                                | ILMVGLDAAGK, DAVLLVFANK, NI<br>SFTVWDVGGQDK, MLADEL, L<br>GLHSLR, HYFQNTQGLIFVDSND<br>R, LGEIVTTIPTIGFNVETVEYK<br>IRPLWR, LGLHSLR, LGEIVTTIPTIGF<br>NVETVEYK                                                                                                                                                                                                                   |

|                |          |         |                                                                     |                                                                                                                                                                                                   |                                                                                                                                                                                   |
|----------------|----------|---------|---------------------------------------------------------------------|---------------------------------------------------------------------------------------------------------------------------------------------------------------------------------------------------|-----------------------------------------------------------------------------------------------------------------------------------------------------------------------------------|
| IPI00876029.1  |          | Arf4    | 20 kDa protein                                                      |                                                                                                                                                                                                   | ILMVGLDAAGK,MLLEDELQDAVL<br>LLFANK,HYFQNTQGLIFVVSND<br>R,LGEIVTTIPTIGFNVETVEYK                                                                                                    |
| IPI00221615.5  | P84084   | Arf5    | ADP-ribosylation factor 5                                           |                                                                                                                                                                                                   | LGLQHLR,IRPLWR,LGEIVTTIPTIGF<br>NVETVEYK                                                                                                                                          |
| IPI00387227.1  | Q9EPJ9   | Arfgap1 | Isoform 1 of ADP-ribosylation factor<br>GTPase-activating protein 1 | AFEDWLNDLGSYQGAQENR,AAPST<br>ADEGWDNQNW,IFDDVSSGVSQLASK<br>,EFLETQDDYEPSWSLQDK,EWSLESS<br>PAQNWTPPQPK                                                                                             |                                                                                                                                                                                   |
| IPI00109656.2  | Q99K28-2 | Arfgap2 | Isoform 2 of ADP-ribosylation factor<br>GTPase-activating protein 2 | STELDSNWSWLQLR,SSISHSVLSEM<br>QMIEQETPLSAK,SQLDLFDDVGTAFAS<br>GPPK                                                                                                                                |                                                                                                                                                                                   |
| IPI00322312.3  | Q99PT1   | Arhgdia | Rho GDP-dissociation inhibitor 1                                    | SIQEIQELDKDDESLR,VAVSADPNVP<br>NVIVTR,AEYEFLLPMEEAPK,SIQEIQ<br>ELDKDDESLRK,FTDDDKTDHLSWEW<br>NLTIK                                                                                                | SIQEIQELDKDDESLR,VAVSADP<br>NVPNVIVTR,SIQEIQELDKDDESL<br>RK,LTLVCSTAPGPLELDTGDLE<br>VAVSADPNVPNVIVTR,LTLVCSTAP<br>GPLELDTGDLESFK,YIQHTYR<br>ESFKK,YIQHTYR,FTDDDKTDHLS<br>WEWNLTIK |
| IPI00652900.1  | Q61210-5 | Arhgef1 | Isoform 5 of Rho guanine nucleotide<br>exchange factor 1            | SGLELEPEEPPGWR,FIQEVVQSQA<br>AVSR,TVGTPGQDNPVSLHPLSTDS<br>VDSR,LLSHLEETQHTISTDEEK                                                                                                                 |                                                                                                                                                                                   |
| IPI00655136.3  | Q9ES28   | Arhgef7 | Isoform B of Rho guanine nucleotide<br>exchange factor 7            | SYYNVVLQNILETEHEYSK,FNFQQTN<br>EDELFSFK                                                                                                                                                           |                                                                                                                                                                                   |
| IPI00648459.1  | A2BH40   | Arid1a  | AT rich interactive domain 1A                                       | KAPGSDPFMSSGQGPNGMGDPYS<br>R,SNSVGIQDAFPDGSDFQK,ELAT<br>NLNVGTSSSAASSLK,AAAGQESEGP<br>AVGPPQPLGK,FPPPQELSQDSFGSQ<br>ASSAPSMTSSK,NPQMPQYTSPQPGS<br>ALSPR,GEDPPPDIFAAADSK,NSMTP<br>NPGYQPSMNTSDMMGR |                                                                                                                                                                                   |
| IPI00848707.3  |          | Arid1b  | AT rich interactive domain 1B                                       | SSTVSVHDPFSDVSDSAYPK,ELATNL<br>NVGTSSSAASSLK                                                                                                                                                      |                                                                                                                                                                                   |
| IPI00278498.10 | P61211   | Ar1     | ADP-ribosylation factor-like protein 1                              |                                                                                                                                                                                                   | ILILGLDGAGK,AILVVFANK                                                                                                                                                             |
| IPI00124787.3  | Q9WUL7   | Ar3     | ADP-ribosylation factor-like protein 3                              | FEETGQELTELEEEK,QLASEDISHIT<br>PTQGFNIK,SYFENTDILYVIDSADR,Q<br>DLLTAAPASEIAEGLNLHTIR                                                                                                              |                                                                                                                                                                                   |
| IPI00137460.3  |          | Armc10  | Isoform 2 of Armadillo repeat-containing<br>protein 10              |                                                                                                                                                                                                   | LLTNMTVTNDYQHLLSGSVAGLFLH<br>LLLGNGSTK,IYVPQVCEDVFADPLN<br>SAVQLAGLR                                                                                                              |
| IPI00661414.2  | Q9CVB6   | Arpc2   | Actin-related protein 2/3 complex subunit<br>2                      |                                                                                                                                                                                                   | ASHTAPQVLFVSHR,AVIHYR                                                                                                                                                             |
| IPI00124829.5  | Q9JM76   | Arpc3   | Actin-related protein 2/3 complex subunit<br>3                      | LIGNMALLPLR,DTDIVDEAIYYFK                                                                                                                                                                         |                                                                                                                                                                                   |
| IPI00138691.6  | P59999   | Arpc4   | Actin-related protein 2/3 complex subunit<br>4                      | AENFFILR,ELLLQPVTISR                                                                                                                                                                              |                                                                                                                                                                                   |

|               |          |         |                                                                                      |                                                                                                        |                                                                                                                                         |
|---------------|----------|---------|--------------------------------------------------------------------------------------|--------------------------------------------------------------------------------------------------------|-----------------------------------------------------------------------------------------------------------------------------------------|
| IPI00399943.3 | Q9CPW4   | Arpc5   | Actin-related protein 2/3 complex subunit 5                                          | QGNMTAALQAALKNPPINTK,QGNMTAALQAALK                                                                     |                                                                                                                                         |
| IPI00111117.5 | Q9D898   | Arpc5l  | Actin-related protein 2/3 complex subunit 5-like protein                             | ALAVGGLGSIIR,GF EKPTENSSAVLLQWHEK,SSEIEQAVQSLDR                                                        | NGIDLLMK,SSEIEQAVQSLDRNGIDLLMK,ALAVGGLGSIIR                                                                                             |
| IPI00647964.2 | Q91Y14-2 | Arrb2   | Isoform 2 of Beta-arrestin-2                                                         | EDLDVLGLSFR,KVQFAPETPGPQPSAETTR                                                                        |                                                                                                                                         |
| IPI00127472.2 | P98203-3 | Arvcf   | Isoform 3 of Armadillo repeat protein deleted in velo-cardio-facial syndrome homolog | SLPEHFQAEPYGLEDDTR,GTPSSGGFDDSTLPLVDK                                                                  |                                                                                                                                         |
| IPI00134544.3 | Q9QWY8   | Asap1   | Isoform 1 of Arf-GAP with SH3 domain, ANK repeat and PH domain-containing protein 1  | NVGNNSFNDIMEANLPSPSPKPTPSSDMTVRK,QPAKLNLLTCQVKPNAEDK                                                   |                                                                                                                                         |
| IPI00553465.4 | Q99MY8   | Ash1l   | Probable histone-lysine N-methyltransferase ASH1L                                    |                                                                                                        | NLDHVNK,LGIGIVPGLVVK,EMPQLEGGPK,HNQLYKK,KPSLTSDSGIHAITPSVWNFTSLFSNKPFLK,KYPQLR,EICDGIISYR,SPFSAVGESNLPSSPTVSVNPVTR,LSSSMCVTSDLLSDIYKPKR |
| IPI00131513.5 | Q91X20   | Ash2l   | Set1/Ash2 histone methyltransferase complex subunit ASH2                             | FGLLDQDLNIGPAYDNQK,YILAEPDPHAPDPEK,DIFEGVYFPAISLYK                                                     |                                                                                                                                         |
| IPI00314788.5 | Q91Y10   | Asl     | Argininosuccinate lyase                                                              |                                                                                                        | INVLPGLSGAIGNPLGVDR,VLIGTMVDR,CAGLLMTLK                                                                                                 |
| IPI00116966.8 | Q61024   | Asns    | Asparagine synthetase [glutamine-hydrolyzing]                                        |                                                                                                        | FPFNTPK,TTAAHGLELR,IGCLLSGLDSSSLVAASLLK,LAVVDPLFGMQPIR                                                                                  |
| IPI00121364.2 | Q8VBT9   | Aspscr1 | Isoform 1 of Tether containing UBX domain for GLUT4                                  | AALQNTTLQSLGLTGGSATIR,QLWE LLSHFAQTR                                                                   |                                                                                                                                         |
| IPI00134746.5 | P16460   | Ass1    | Argininosuccinate synthase                                                           | GSVVLAYSGGLDTSCILVWLK,TTSLELFMYLNEVAGK,SPWSMDENLMHISYEAGILENPK,GIYETPAGTILYHAHLDIEAFTMDR,APNSPDVLEIEFK |                                                                                                                                         |
| IPI00126913.5 | Q92511   | Atad3a  | Isoform 1 of ATPase family AAA domain-containing protein 3                           |                                                                                                        | LKEYEAAVEQLK,LVSRPQDALEGVILSPSLEAR,ISVLEALR,GLLLFVDEADAFLR                                                                              |
| IPI00117379.3 | O08997   | Atox1   | Copper transport protein ATOX1                                                       | LGGVEFNIDLPNK,LGGVEFNIDLPNKKVSYLGPK                                                                    | EIAQLAVAWQAMAYSSSEDGVLTEAMMDAR,LVSRPQDALEGVILSPSLEAR                                                                                    |
|               |          |         |                                                                                      |                                                                                                        | VCIDSEHSSDTLLATLNK,LGGVEFNIDLPNK,LGGVEFNIDLPNKK,AVSYLGPK                                                                                |

|               |        |        |                                                                        |                                                                                                                                                                                                                                                                                                                                             |                                                                                                                                                                                                                                                                                                                   |
|---------------|--------|--------|------------------------------------------------------------------------|---------------------------------------------------------------------------------------------------------------------------------------------------------------------------------------------------------------------------------------------------------------------------------------------------------------------------------------------|-------------------------------------------------------------------------------------------------------------------------------------------------------------------------------------------------------------------------------------------------------------------------------------------------------------------|
| IPI00311682.5 | Q8VDN2 | Atp1a1 | Sodium/potassium-transporting ATPase subunit alpha-1                   | DKYEPAAVSEHGDKK,VIMVTGD<br>HPITAK,IISANGCK,GIVVYTGDR,<br>MSINAEDVVVGDLVEVK,IVEIPFN<br>STNK,AVFQANQENLPILK,LIVVEG<br>CQR, LNIPVNQVNPR, YHTEIVFAR<br>, YEPAAVSEHGDKK, ACVVHGSDL<br>K, KADIGVAMGIVGSDVSK, GVGII<br>SEGNETVEDIAAR, VDNSSLTGES<br>EPQTR, SPDFTNENPLETR, AVAG<br>DASESALLK, EQPLDEELKDAFQN<br>AYLELGGLGER                         | RPGGWVEK, HLLVMK, YQLSIHK, AV<br>FQANQENLPILK, LNIPVNQVNPR                                                                                                                                                                                                                                                        |
| IPI00124221.1 | P97370 | Atp1b3 | Sodium/potassium-transporting ATPase subunit beta-3                    |                                                                                                                                                                                                                                                                                                                                             | IIDLIPDGYPQISCLPK, NLTSCP DGA<br>PFIQHGP DYR                                                                                                                                                                                                                                                                      |
| IPI00311654.4 | Q8R429 | Atp2a1 | Sarcoplasmic/endoplasmic reticulum calcium ATPase 1                    | EVTGSIQLCR, VDQSILTGESVSVI<br>K, HTDPVPDPR, KNAIVRSLPSVET<br>LGCTSVICSDK                                                                                                                                                                                                                                                                    |                                                                                                                                                                                                                                                                                                                   |
| IPI00338964.3 | O55143 | Atp2a2 | Isoform SERCA2B of Sarcoplasmic/endoplasmic reticulum calcium ATPase 2 | VDQSILTGESVSVIK, HTDPVPDP<br>R, IGIFGQDEDVTSK, KNAIVRSLP<br>SVETLGCTSVICSDK, VGEATETA<br>LTCLVEK, TVEEVLGHFGVNESTG<br>LSLEQVK, AMGVVVATGVNTEIGK                                                                                                                                                                                             | VDQSILTGESVSVIK, NMLFSGTNIA<br>AGK, YLAIGCYVGAATVGA AWWFI<br>AADGGPR, DIVPGDIVEIAVGD K, VG<br>EATETALTCLVEK, ANACNSVIK                                                                                                                                                                                            |
| IPI00130280.1 | Q03265 | Atp5a1 | ATP synthase subunit alpha, mitochondrial                              | GMSLNLEPDNVGVVVF GNDK, FE<br>NAFLSHVISQHQ SLLGNIR, LKEIV<br>TNFLAGFEP, EAYPGDV FYLHSR,<br>HALIYDDL SK, EVA AFAQFGSDLD<br>AATQQLSR, TGAIVDVPVGEELL<br>GR, GIRPAINVGLSVSR, LELAQYR<br>, NVQAEEMVEFSSGLK, EIVTNFLA<br>GFEP, VVDALGNAIDGK, AVDSL V<br>PIGR, STVAQLVK, PAINVGLSVSR,<br>VLSIGDGIAR, LYCIYVAIGQK, ILGA<br>DTSVDLEETGR, TSIAIDIINQK | RVGLKAPGIIPR, TGTAE MSSILEER,<br>FENAF LSHVISQHQ SLLGNIR, EVAA<br>FAQFGSDLDAATQQLSR, QMSLLL<br>R, TGAIVDVPVGEELLGR, GIRPAINV<br>GLSVSR, VGSAAQTR, LELAQYR, EIV<br>TNFLAGFEP, VVDALGNAIDGK, AVD<br>SLVPIGR, PAINVGLSVSR, VLSIGDGI<br>AR, STVAQLVK, ILGADTSVDLEETG<br>R, ITKFENAF LSHVISQHQ SLLGNIR,<br>TSIAIDIINQK |

|               |        |          |                                                       |                                    |                                                                                                                                                                                                                                                                                                                                                                                                                                                                                                                                                                                                                                                                                                                                                                                                                                 |
|---------------|--------|----------|-------------------------------------------------------|------------------------------------|---------------------------------------------------------------------------------------------------------------------------------------------------------------------------------------------------------------------------------------------------------------------------------------------------------------------------------------------------------------------------------------------------------------------------------------------------------------------------------------------------------------------------------------------------------------------------------------------------------------------------------------------------------------------------------------------------------------------------------------------------------------------------------------------------------------------------------|
| IPI00468481.2 | P56480 | Atp5b    | ATP synthase subunit beta, mitochondrial              |                                    | EGNDLYHEMIESGVINLK,AHGGY<br>SVFAGVGER,DQEGQDVLLFIDNI<br>FR,GSITSVQAIYVPADDLTDPAPA<br>TTFAHLDATTVLSR,IVAVIGAVVD<br>IMDPNIVGNEHYDVAR,EGNDLYHE<br>VQFDEGLPPIILNALEVQGR,QFAP<br>MIESGVINLK,DQEGQDVLLFIDNIFR<br>IHAEAPEFIEMSVEQEILVTGIK,VV<br>,TIAMDGTEGLVR,MLSLVGR,ILQDY<br>DLLAPYAK,ILQDYK,IGLFGGAGV<br>K,VVDLLAPYAK,IGLFGGAGVGK,FT<br>GK,SLQDIIAILGMDELSEEDKLTV<br>QAGSEVSALLGR,FLSQPFQVAEVF<br>SR,FTQAGSEVSALLGR,KGSITSV<br>TGHMGK,IPVGPETLGR,IPSAVGYQ<br>QAIYVPADDLTDPAPATTF AHLDA<br>PTLATDMGMTMQR,IMNVIGEPIDER<br>TTVLSR,FLSQPFQVAEVFTGHM<br>,AIAELGIYPAVDPLDSTSR,GFQQIL<br>GK,IPVGPETLGR,AIAELGIYPAVD<br>AGEYDHLPEQAFYMGPIEEAVAK,<br>PLDSTSR,GFQQILAGEYDHLPEQ<br>TVLIMELINNVAK,LVLEVAQHLGES<br>AFYMGPIEEAVAK,TVLIMELINN<br>TVR,VALTGLTVAEYFR,VLDSGAPIK<br>VAK,LVLEVAQHLGESTVR,VALV<br>YGMNEPPGAR,VALTGLTVAEY<br>FR,VLDSGAPIK |
| IPI00313475.1 | Q91VR2 | Atp5c1   | ATP synthase subunit gamma, mitochondrial             |                                    | HLIIGVSSDR,KPPTFGDASVIALE<br>LLNSGYEFDEGSIIFNQFK,LTLTF<br>NR,THSDQFLVSFK,EVMIVGVGE<br>VYGTGSLALYEK,GLCGAIHSSVAK<br>K,VYGTGSLALYEK,ELIEIISGAA<br>LD,GLCGAIHSSVAK                                                                                                                                                                                                                                                                                                                                                                                                                                                                                                                                                                                                                                                                 |
| IPI00453777.2 | Q9D3D9 | Atp5d    | ATP synthase subunit delta, mitochondrial             |                                    | QVDVPTLTGAFGILASHVPTLQVL<br>RPGLVVVHTEDGTTTK,AQSELS<br>GADEAAR,PGLVVVHTEDGTTT<br>K,IEANEALVK                                                                                                                                                                                                                                                                                                                                                                                                                                                                                                                                                                                                                                                                                                                                    |
| IPI00341282.2 | Q9CQQ7 | Atp5f1   | ATP synthase subunit b, mitochondrial                 |                                    | AQQALVQK,NNIALALEVTYR,TGV<br>TGPPYVLGTGLSLYFLSK,IAQLEEV<br>K,LGLIPEEFFQFLYPK,LDYHISVQ<br>NMMR<br>AQQALVQK,TGVTGPYVLGTGLSLY<br>FLSK,IAQLEEVK,LGLIPEEFFQFLYP<br>K                                                                                                                                                                                                                                                                                                                                                                                                                                                                                                                                                                                                                                                                 |
| IPI00230507.5 | Q9DCX2 | Atp5h    | ATP synthase subunit d, mitochondrial                 | TIDWVSFVEVMPQNQK,KYPYWPHQP<br>IENL | LASLSEKPPAIDWAYYR,ANVAKP<br>GLVDDFEKK,ANVAKPGLVDDFE<br>K,IPVPEDK,SCAEFVSGSQLR,TID<br>WVSFVEVMPQNQK<br>LASLSEKPPAIDWAYYR,YPYWPHQ<br>PIENL,IPVPEDK,NIIPFDQMTIDDLN<br>EIFPETK,SCAEFVSGSQLR                                                                                                                                                                                                                                                                                                                                                                                                                                                                                                                                                                                                                                         |
| IPI00271986.6 | P56135 | Atp5j2   | ATP synthase subunit f, mitochondrial                 |                                    | DFTPSGIAGAFR,KLMEVK,LGELP<br>SWIMMR                                                                                                                                                                                                                                                                                                                                                                                                                                                                                                                                                                                                                                                                                                                                                                                             |
| IPI00111770.7 | Q06185 | Atp5k    | ATP synthase subunit e, mitochondrial                 |                                    | LDELKR,YSALIIGMAYGAK,YSYL<br>KPR,ELAEAQDDSILK,MVPPVQV<br>SPLIK                                                                                                                                                                                                                                                                                                                                                                                                                                                                                                                                                                                                                                                                                                                                                                  |
| IPI00133342.1 | Q9CQY3 | Atp5l    | Putative uncharacterized protein                      |                                    | LATFWHYAK,APSMVAAAVTYSK,<br>KIIQSAK,VELVPPTPAEIPAIQSV<br>K,APSMVAAAVTYSKPR                                                                                                                                                                                                                                                                                                                                                                                                                                                                                                                                                                                                                                                                                                                                                      |
| IPI00407692.3 | P50516 | Atp6v1a  | Isoform 1 of V-type proton ATPase catalytic subunit A |                                    | VGHSELVGEIIR,LPANHPLLTGQ<br>R,ASLAETDKITLEVAK                                                                                                                                                                                                                                                                                                                                                                                                                                                                                                                                                                                                                                                                                                                                                                                   |
| IPI00119113.3 | P62814 | Atp6v1b2 | V-type proton ATPase subunit B, brain isoform         |                                    | IPIFSAAGLPHNEIAAQICR,QIYPPIN<br>VLP SLSR                                                                                                                                                                                                                                                                                                                                                                                                                                                                                                                                                                                                                                                                                                                                                                                        |



|               |          |         |                                                |                                                                                                                                                                                                                                    |                                                                                                    |
|---------------|----------|---------|------------------------------------------------|------------------------------------------------------------------------------------------------------------------------------------------------------------------------------------------------------------------------------------|----------------------------------------------------------------------------------------------------|
| IPI00118787.1 | P57746   | Atp6v1d | V-type proton ATPase subunit D                 | AAGEVMEPANLLAE EK,TLAYIITELDE<br>R,FTAGDFSTTVIQNVNK                                                                                                                                                                                |                                                                                                    |
| IPI00116896.1 | P03930   | ATP8    | ATP synthase protein 8                         |                                                                                                                                                                                                                                    | VSSQTFPLAPSPK,IYLP HSLPQQ,<br>TPWELK                                                               |
| IPI00223024.3 | Q8BMG1   | Atrip   | ATR-interacting protein                        |                                                                                                                                                                                                                                    | MLLQLMASSSAASGHFQASV LGLC<br>LK,TNKPAAPSVSHVSPRK                                                   |
| IPI00123202.1 | P28658   | Atxn10  | Ataxin-10                                      |                                                                                                                                                                                                                                    | ITLLDIVIAK,LSGIMVPAPIQDLEAL<br>R,CLRNACIECSVNQNSIR,NACIE<br>CSVNQNSIR,LVGEEQLTK                    |
| IPI00117229.3 |          | Atxn2   | ataxin 2                                       | ANQLAEEIESSAQYK,LQPSSTSESM D<br>QLLSK,TSPAGGTWSSVSGVPR,TNS<br>PSISPSMLSNAEHKR,GSMSSGLEFVS<br>HNPPSEAAAPPVAR,GLPQPTISFDGIY<br>ANVR                                                                                                  |                                                                                                    |
| IPI00459758.1 | Q62506   | Atxn2   | Unknown protein (Fragment)                     |                                                                                                                                                                                                                                    | PPLVLCITK,AVGLAAATGTVA AAAAA<br>SVKR                                                               |
| IPI00458001.1 | Q7TQH0-2 | Atxn2l  | Isoform 2 of Ataxin-2-like protein             | EVDGLLTSDPMGSPVSSK,LQPSSSPE<br>TGLDPFPSR,GAESILAASAPPQHQR<br>PGAVAIGSVR,TTYDSSLSSYTVPLEK,<br>REDIVDTMVFKPSDVLLVHFR,EDIVDT<br>MVFKPSDVLLVHFR,EFNPTKPLLSVN<br>K,GPPQSPVFEQVYNNR,EKEVDGLL<br>TSDPMGSPVSSK,TLSSPSNRPSGEA<br>SVPPTSAVGR | LQPSSSPETGLDPFPSR,GPHHLDN<br>SSPGPGSEAR                                                            |
| IPI00230633.1 | P97477-2 | Aurka   | Isoform 2 of Serine/threonine-protein kinase 6 | VLVTEQIPSNLGSASSGQAQR,VYLIL<br>EYAPLGTVYR,DIKPENLLLGSNGELK                                                                                                                                                                         |                                                                                                    |
| IPI00387315.1 | Q8C6C1   | Aurkb   | aurora kinase B                                | DIKPENLLLGLQGELK,FPSSVPSGAQ<br>DLISK                                                                                                                                                                                               |                                                                                                    |
| IPI00226228.5 | Q62036   | Azi1    | 5-azacytidine-induced protein 1                | PAEPTDFLMLFEGSTSGR,LQSIMTFL<br>DEMEK                                                                                                                                                                                               |                                                                                                    |
| IPI00387388.3 | A6H663   | Bag3    | BCL2-associated athanogene 3                   | VQGLEQAVDSFEGK,PGYIPIV LHEG<br>SENR,AIDVPGQVQVYELQPSNLEAEQ<br>PLQEIMGAVVADK,AIDVPGQVQVYEL<br>QPSNLEAEQPLQEIMGAVVADKDK,EL<br>LALDSVDPEGR,YLMIEEYLTK,PGPAG<br>PDLPPGHIPIQVIR                                                         |                                                                                                    |
| IPI00895277.1 | B1ASC0   | Bai2    | Brain-specific angiogenesis inhibitor 2        |                                                                                                                                                                                                                                    | SVLFQALFAVFNSAQQGFVITAVHCF<br>LR,RTLSLQPGGGGTAGEEAPR,AG<br>ASLWSSCVLPLLALTWMSAVLAM<br>TDRR,EVQDVVK |
| IPI00119959.1 | O54962   | Banf1   | Barrier-to-autointegration factor              | DFVAEPMGEKPVGSLAGIGDVL SK,HR<br>DFVAEPMGEKPVGSLAGIGDVL SK,AY<br>VVLGQFLVLK                                                                                                                                                         | DFVAEPMGEKPVGSLAGIGDVL SK,<br>K,DCFGCLR,KDEDLFR,PVGS LA<br>GIGDVL SK,AYVVLGQFLVLK                  |

|               |        |          |                                                                                                                           |                                                                                                                                                                                                                                      |                                                                                                                                                             |
|---------------|--------|----------|---------------------------------------------------------------------------------------------------------------------------|--------------------------------------------------------------------------------------------------------------------------------------------------------------------------------------------------------------------------------------|-------------------------------------------------------------------------------------------------------------------------------------------------------------|
| IPI00129519.3 | Q91XV3 | Basp1    | Brain acid soluble protein 1                                                                                              | ESEPQAAADATEVK,AEPEKSEGAEE<br>QPEPAPAPEQEAAPGPAAGGEAPK,<br>AGEASAESTGAADGAAPEEGEAK,SE<br>GAAEEQPEPAPAPEQEAAPGPAAG<br>GEAPK,APAPAAPAAAEQAEAPAAA<br>SSEQSVAVKE,APAPAAPAAAEQAEA<br>PAAAASSEQSVAVK                                       |                                                                                                                                                             |
| IPI00409462.2 | Q9Z1N5 | Bat1a    | Spliceosome RNA helicase Bat1                                                                                             | LTLHGLQQYYVK,ILVATNLFGR,LFDLL<br>DVLEFNQVIVFK,DFLLKPELLR,GLAI<br>TFVSDENDAK,KFMQDPMEIFVDEETK<br>,FMQDPMEIFVDEETK                                                                                                                     | LTLHGLQQYYVK,ILVATNLFGR,K<br>DEEVLK,DFLLKPELLR,GLAITFVS<br>DENDAK,ILNDVQDR,FEVNISELP<br>DEIDISSYIEQTR,VAVFFGGLSIK,<br>CIAQAQLLVEQNFPAIAIHR,GSYV<br>SIHSSGFR |
| IPI00380722.1 | Q7TSC1 | Bat2     | Large proline-rich protein BAT2                                                                                           | LKAEPAPPVTPAAPALPPVVPK,YSS<br>LNLFDYK,SSDASTAQPPESQPLPAS<br>QTPASNQPK                                                                                                                                                                |                                                                                                                                                             |
| IPI00330171.3 |        | Bat2d    | RIKEN cDNA 1810043M20                                                                                                     | LPDLSLVENK,MMWGSDPYHAEPQQA<br>ATPK,ESVTDYTPSSSLPNTVATNNA<br>K,LPSAQTSTNGTDFVAAGK,AFGSGIDI<br>KPGTPPIGGR,AENKGNPNVNIIVPKD<br>GTGWASK,QLGQDESTAITSEQNDILK,<br>VAAPAVLNDISK,YATLSLFNTYK,DQM<br>EGSPNSSESEFEIAR,PSQDEKLEPV<br>GSVQVEPVVK | HGLQSLGK,APEVSPAQPK                                                                                                                                         |
| IPI00380415.2 | Q7TPM1 | Bat2l    | Isoform 1 of Protein BAT2-like                                                                                            | LQDVLASNAGLTQSIPILR,SPDEALPG<br>GLGSHSPYALER,SSPYGTLKPEEISG<br>PGLAESK                                                                                                                                                               |                                                                                                                                                             |
| IPI00120684.2 | Q07813 | Bax      | Apoptosis regulator BAX                                                                                                   |                                                                                                                                                                                                                                      | VVALFYFASK,TGAFLLQGFIQDR                                                                                                                                    |
| IPI00130157.2 |        | Baz2a    | bromodomain adjacent to zinc finger domain, 2A                                                                            |                                                                                                                                                                                                                                      | AFSDCLTIVEFLHSFGK,PKPGSLQP<br>QLHQSTIR                                                                                                                      |
| IPI00625898.3 | Q8VBW5 | Bbx      | Isoform 1 of HMG box transcription factor BBX                                                                             | QFFLDAIHPTAIFSEDK,QSSESDIES<br>VMYTIEAVAK                                                                                                                                                                                            |                                                                                                                                                             |
| IPI00115553.2 | Q3TQI7 | BC005624 | Uncharacterized protein C9orf78 homolog                                                                                   | FYHEELNAPIR,VSEEDLHLGTSFSAE<br>TNR,KDSETSFVPTNMAVNYVQHNR,K<br>TEEMLSNQMLSGIPEVDLIGIDAK,VQE<br>ETTLVDDPFQMATGGMVDK,KRPNG<br>VSAAALLVGEK,DSETSFVPTNMAVNY<br>VQHNR                                                                      |                                                                                                                                                             |
| IPI00653023.2 | A2AS03 | BC006779 | Novel protein, possible orthologue of human peroxisomal proliferator-activated receptor A interacting complex 285 PRIC285 |                                                                                                                                                                                                                                      | RHELAFVCR,TYTLAMAALVVQ<br>QPHTK                                                                                                                             |

|               |        |          |                                                         |                                                                                                                            |                                                                                                                                            |
|---------------|--------|----------|---------------------------------------------------------|----------------------------------------------------------------------------------------------------------------------------|--------------------------------------------------------------------------------------------------------------------------------------------|
| IPI00347814.2 | Q5U445 | BC085271 | cDNA sequence BC085271                                  | VEVTEFEDIK,EQQEAIEHIDEVQNEID<br>R,IDFYFDENPYFENK                                                                           | EQQEAIEHIDEVQNEIDR,VEVTEF<br>EDIK,RQSAILPQPK,IPNFWVTTF<br>VNHPQVSALLGEEDEEALHYLTR,<br>GEKEQQEAIEHIDEVQNEIDR,LN<br>EQASEEILK,IDFYFDENPYFENK |
| IPI00279010.6 | Q99K86 | Bcam     | Bcam protein                                            | VEDYDADEEVQLVK,TQSFQLIVQGAP<br>ELKPNEIMPK,EASGLYSLTSTLYLR,LA<br>SVEPQGSEFLGTVHSLGR                                         |                                                                                                                                            |
| IPI00316184.1 | Q9D287 | Bcas2    | Pre-mRNA-splicing factor SPF27                          | EAAAALVEEETR,TIVQLENEIQIK                                                                                                  |                                                                                                                                            |
| IPI00415385.1 | Q8K019 | Bclaf1   | Isoform 1 of Bcl-2-associated<br>transcription factor 1 | SQEEPKDTFEHDPSESIDEFNK,DTFE<br>HDPSESIDEFNK                                                                                |                                                                                                                                            |
| IPI00134095.3 |        | Birc6    | baculoviral IAP repeat-containing 6                     |                                                                                                                            | TAEIVHAATANLR,LVNILVQLPLS<br>SNR,LLDYVATVEDEAAAAK,LLA<br>GQPLPAEMTLAQLLTLLYDR                                                              |
| IPI00153107.3 | Q8R016 | Blmh     | Bleomycin hydrolase                                     |                                                                                                                            | ATVQGAQHVFQHVVPQEGKPVTN<br>QK,TLYNNQPIDFLK,IGPITPLQFYK                                                                                     |
| IPI00857740.1 |        | Blvrb    | 27 kDa protein                                          | TGLTTLAQAVQAGYEVTVLVR,YVAVM<br>PPHIGDQPLTGAYTVTLTLDGR,LPSEGP<br>QPAHVVVGDVR                                                | ILQESGLK,TGLTTLAQAVQAGYE<br>VTVLVR                                                                                                         |
| IPI00453860.2 | Q6PGF5 | Bms1     | BMS1-like, ribosome assembly protein                    | IAATGVVLDLDDK,LLMSDIVFMR                                                                                                   |                                                                                                                                            |
| IPI00111953.1 | Q9D8S9 | Bola1    | BolA-like protein 1                                     | NESGGHAVPAGSETHFR,LVHEALSE<br>ELAGPVHALAIQAK                                                                               |                                                                                                                                            |
| IPI00221694.1 | Q8BGS2 | Bola2    | Isoform 1 of BolA-like protein 2                        |                                                                                                                            | TLTPEQWTR,LVNECLAEELPHIH<br>AFEQK                                                                                                          |
| IPI00387354.5 | P97452 | Bop1     | Ribosome biogenesis protein BOP1                        |                                                                                                                            | LTDEQVALVHR,GDYLAVVLSSQE IYKPLR,TVHVGGVVR,LLVGSTDQL<br>HTQVLLHQVSR LEAFTPPEEPALQPAR,AVAFHPR                                                |
| IPI00133099.1 | O88665 | Brd7     | Bromodomain-containing protein 7                        | NNDYQSIEELKDNFK,EMYLAEQVTNN<br>LK,VGGSEVTELTGSSGHSSLFEDR                                                                   |                                                                                                                                            |
| IPI00130436.5 | Q9DCA5 | Brix1    | Brix domain-containing protein 2                        | NFQIIEEDAALVEIGPR,SQPFVDHVFT<br>FTILDNR,RGGLEVQAK,TILPHDPTAD<br>VFVIPAEK,PLLSFDPAFDDLPHYALL<br>K,EFLIQIFSTPR,FLVQNIHTLAELK | FVLNLIK,SQPFVDHVFTTILDNR,<br>EFLIQIFSTPR                                                                                                   |
| IPI00408495.1 | P18572 | Bsg      | Isoform 1 of Basigin                                    |                                                                                                                            | YVVVSTPEK,VLQEDTLPDLHTK                                                                                                                    |

|               |        |               |                                                                      |                                                                                                                                                                                                                                                                       |                                                                                                                                                                                            |                                                                                                               |
|---------------|--------|---------------|----------------------------------------------------------------------|-----------------------------------------------------------------------------------------------------------------------------------------------------------------------------------------------------------------------------------------------------------------------|--------------------------------------------------------------------------------------------------------------------------------------------------------------------------------------------|---------------------------------------------------------------------------------------------------------------|
| IPI00515257.1 | Q64152 | Btf3          | Isoform 1 of Transcription factor BTF3                               | VQASLAANTFTITGHAETK,APLATGED<br>DDDEVPDLVENFDEASKNEAN,KLGV<br>NNISGIEEVNMFTNQGTVIHFNNPK,G<br>GWPGAEATPSLPLGGSR,APLATGED<br>DDDEVPDLVENFDEASK,LGVNNISGI<br>EEVNMFTNQGTVIHFNNPK,ETIMNQE<br>KLAKLQAQVR,QLTEMLPSILNQLGAD<br>SLTSLR                                        | VQASLAANTFTITGHAETK,APLAT<br>GEDDDDEVPDLVENFDEASKNE<br>AN,LGVNNISGIEEVNMFTNQGT<br>VIHFNNPK                                                                                                 | VQASLAANTFTITGHAETK,APLATG<br>EDDDDEVPDLVENFDEASK,LGVNN<br>ISGIEEVNMFTNQGTVIHFNNPK,QL<br>TEMLPSILNQLGADSLTSLR |
| IPI00132539.3 | Q9CQH7 | Btf3l4        | Transcription factor BTF3 homolog 4                                  | APKPEDIDEEDDDVPDLVENFDEASK<br>NEAN,KLAVNNIAGIEEVNMIK,LAVNNI<br>AGIEEVNMIK,VQASLSANTFAITGHAE<br>AK,APKPEDIDEEDDDVPDLVENFDEA<br>SK                                                                                                                                      |                                                                                                                                                                                            |                                                                                                               |
| IPI00420724.4 | Q6ZWM5 | Bub3          | Putative uncharacterized protein                                     | VAVEYLDPSPEVQK,FSPNTSQFLLVS<br>SWDTSVR,MHDLNTDQENLVGTHDAP<br>IR                                                                                                                                                                                                       |                                                                                                                                                                                            |                                                                                                               |
| IPI00118762.6 | O54825 | Bysl          | Bystin                                                               | HAPLAEQILAGNAVR,MAGVDHQAEVI<br>VDPEDER,EAIIVGSIITK,FYNLVLLPR,I<br>AEMEYSGANSIFLR                                                                                                                                                                                      |                                                                                                                                                                                            |                                                                                                               |
| IPI00132388.3 | Q9CQC6 | Bzw1          | Basic leucine zipper and W2 domain-<br>containing protein 1          |                                                                                                                                                                                                                                                                       | DIILYVK,FDPTQFQDCIIQGLTETG<br>TDLEAVAK,IVVLFYK                                                                                                                                             |                                                                                                               |
| IPI00330711.4 | Q3U155 | C130022K22Rik | Uncharacterized protein C3orf19<br>homolog                           | DFSFGFWSK,DPEFAPPSNYFVGQK,K<br>PLDVTASSLVDLK                                                                                                                                                                                                                          |                                                                                                                                                                                            |                                                                                                               |
| IPI00132799.4 | Q8R5L1 | C1qbp         | complement component 1, q<br>subcomponent binding protein            | MMSGDWELEVNGTEAK,AFVEFLTDEIK<br>EEK,AEEQEPELTSTPNFVVEVTK,AFV<br>EFLTDEIK,EVSFQATGDSEWR                                                                                                                                                                                | SLPKMSGDWELEVNGTEAKLLR,<br>DTNYTLNTDSDLWALYDHLMDFL<br>ADR,AFVEFLTDEIKEEK,GVDNTF<br>DR,GVDNTFADELVELSTALEHQEYI<br>ADELVELSTALEHQEYITFLEDLK,<br>TFLEDLK,AEEQEPELTSTPNFVVEV<br>TK<br>EFLTDEIK | DTNYTLNTDSDLWALYDHLMDFLA<br>DR,GVDNTFADELVELSTALEHQEYI<br>TFLEDLK,AEEQEPELTSTPNFVVEV<br>TK                    |
| IPI00226576.1 | Q8BWZ3 | C330023M02Rik | Isoform 1 of N-terminal acetyltransferase<br>B complex subunit MDM20 |                                                                                                                                                                                                                                                                       | LALPADIR,IENSLASLLELLK,LLLQ<br>QLEVAVETGKR,GLQQHLCVVQL<br>TR,VQSSYLHSLLETGELLR,EAG<br>EETAVWQALTLEEGLTHSPSNA<br>QFK,IYCVLGAFEPVVDLYSSLDA<br>K,ETSIIMPPIFTSFQDYVTGLQTVI<br>SNAVDHIK         |                                                                                                               |
| IPI00115650.4 | Q9CXW3 | Cacybp        | Calcyclin-binding protein                                            | EKPSYDTEADPSEGLMNVLKK,NYSMI<br>VNNLLKPISVESSSK,IYITLTGVHQVP<br>TENVQVHFTER,EKEKPSYDTEADPSE<br>GLMNVLK,WDYLTQVEK,PAAVVAPLT<br>TGTYVK,NLNGKNYSMIVNLLKPISVE<br>SSSK,NYSMIVNLLKPISVESSSK,KP<br>ELDNEKPAAVVAPLTTGYTVK,EKPSY<br>DTEADPSEGLMNVLKK,NYSMIVNLLK,<br>IYEDGDDDMKR | IYITLTGVHQVPTENVQVHFTER,T<br>WDYLTQVEK,PAAVVAPLTTGYTVK,<br>DTVIILCR,SKIETELK,LRDTLTSEK<br>PELDNEKPAAVVAPLTTGYTVK,NY<br>,KPELDNEKPAAVVAPLTTGYTVK<br>,SFDLLVK                                | SMIVNLLKPISVESSSK,PISVESS<br>K                                                                                |

|               |        |       |                                                                                  |                                                                                                                                                                                                                                                                                                                                                                                                                                                                                                                                                                                                                                                                                                                                                                                                                                                              |                                                                                                                                                                                                                                                                |
|---------------|--------|-------|----------------------------------------------------------------------------------|--------------------------------------------------------------------------------------------------------------------------------------------------------------------------------------------------------------------------------------------------------------------------------------------------------------------------------------------------------------------------------------------------------------------------------------------------------------------------------------------------------------------------------------------------------------------------------------------------------------------------------------------------------------------------------------------------------------------------------------------------------------------------------------------------------------------------------------------------------------|----------------------------------------------------------------------------------------------------------------------------------------------------------------------------------------------------------------------------------------------------------------|
| IPI00380280.3 | B2RQC6 | Cad   | carbamoyl-phosphate synthetase 2, aspartate transcarbamylase, and dihydroorotase | VYFLPITLHYVTQVIR,VLSEPNPR,HPQPGAVELAAK,ASDPGLPAEEK,VLGTSPEAIDSAENR,LYLNETFSELR,QIALAVLSTELAVR,VFNAGGAPR,VNEISVEVDSDPR,RLSSFVTK,LAADFSVPLIIDIK,ICALDCGLK,AIVHAVGQELQVTGPFNLQLIAK,APHVLVLGSGVYR,LGYPVLVRF,FLSSAAAVSK,ALKEENIQTLINPNIATVQTSQGLADK,NILLTIGSYK,AAFALGGLGSGFASTK,MALLATVLGR,LSLDDLLQR,GIPGLQGVDTR,PVFGICLGHQLLALAIGAK,LALGIPLPELR,LPGLIDVHVHLR,GHNQPCLLVGTGR,EIEYEVVR,EAAAGNIGGQTVR,AQGLPVTCEVAPHHLFLNR,KEEILLIK,LLESLGYSLYASLGTADFYTEHGVK,EELSALVAPAFHTSQVLIDK,AQILVLTYPPLIGNYGIPSDDEEDEFGLSK,LGGAVLSFSEATSSVQK,LCPPELPIPGSGLPPPR,GEVRPELGSR,GTEPSALPFVDPNARPLAPEVSIK,PLAPEVSIK,SFEEAFQK,VTAVDWHFEEAVDGECPQR,LLDTIGISQPQWR,ATGYPLAYVAAK,LFVEALGQIGPAPPLK,ELSDLESAR,IDCWFLHR,IVTHAQLLEQHR,NERPDGVLLTFGGQTALNCGVELTK,TLGVDLVALATR,EHPVVISK,VLILGSGGLSIGQAGEFDYSGSQAIAK,AGPSDMELLFDFLETVR,GEVAYIDGQVLVPPGYGQDVR,RPVINAGDGVGEHPTQALLDIFTIR,RVIPGLPDGR | LLDTIGISQPQWR,LFVEALGQIGPAPPLK,LGYPVLVRF,GQALPQDLLHQA K,VYFLPITLHYVTQVIR,AAFALGGLGSGFASTK,AQGLPVTCEVAPHHLLNR,HPQPGAVELAAK,NSVTGGTAVTHAQLLEQHR,EELSALVAPAFHTSQVLIDK,LALGIPLPELR,CGPKPPGFPGLETMLPLLLTAVSEGR,LCPPELPIPGSGLPPPR,GEVRPELGSR,AIVHAVGQELQVTGPFNLQLIAK |
| IPI00311344.3 |        | Cald1 | 89 kDa protein                                                                   | LEQYTNAIEGTK,QUEEESLGQVTDQVEAHVQNSVPDEESK,QQEAALLELEELK, YEVEETEVIK,PASSNTQVEGDEEAA LLER,efdptitdgsLsgpsr                                                                                                                                                                                                                                                                                                                                                                                                                                                                                                                                                                                                                                                                                                                                                    |                                                                                                                                                                                                                                                                |
| IPI00467841.6 | Q3UKW2 | Calm1 | Putative uncharacterized protein                                                 | EAFSLFDKDGDTITTK,EADIDGDGQVNYEEFVQMMTAK,VFDKDGNGYISA AELR                                                                                                                                                                                                                                                                                                                                                                                                                                                                                                                                                                                                                                                                                                                                                                                                    |                                                                                                                                                                                                                                                                |
| IPI00123639.1 | P14211 | Calr  | Calreticulin                                                                     | FYALSAK,GQTLVVQFTVK,HEQNI DCGGGYVK,GLQTSQDAR,IKDPD AAKPEDWDER,SGTIFDNFLITND EAYAEFFGNETWGVTK,KVHVIFN YK                                                                                                                                                                                                                                                                                                                                                                                                                                                                                                                                                                                                                                                                                                                                                      | VHVIFNYK,FYALSAK,EQFLDGDWATNR,HEQNIDCGGGYVK,GLQTSQDAR,SGTIFDNFLITNDEAYAEFFGNETWGVTK,GEWKPR,QIDNPDYK                                                                                                                                                            |

|               |        |           |                                                                 |                                                                                                                                                                                                                                                                                           |                                                                                                                                                                                                   |                                                                                             |
|---------------|--------|-----------|-----------------------------------------------------------------|-------------------------------------------------------------------------------------------------------------------------------------------------------------------------------------------------------------------------------------------------------------------------------------------|---------------------------------------------------------------------------------------------------------------------------------------------------------------------------------------------------|---------------------------------------------------------------------------------------------|
| IPI00399958.3 | Q6XLQ8 | Calu      | calumenin isoform 2                                             | EEFTAFLHPEEYDYMK,YDLFVGSQAT<br>DFGEALVR,DWILPSDYDHAEAEAR,S<br>FDQLTPEESK,IDADKDGFTVEGELK,L<br>GMIVDKIDADKDGFTVEGELK,EEIVDK<br>YDLFVGSQATDFGEALVR,DIVVQETM<br>EDIDK,NADGFIDLEEYIGDMYSHDGN<br>ADEPEWVK,YIYDNVENQWQEFDMNQ<br>DGLISWDEYR,VHND AQNFYDHDFAF<br>LGAEAAK                          |                                                                                                                                                                                                   |                                                                                             |
| IPI00135186.1 | O35887 | Calu      | Calumenin                                                       | EEFTAFLHPEEYDYMK,YDLFVGSQAT<br>DFGEALVR,DWILPSDYDHAEAEAR,S<br>FDQLTPEESK,DGFVTVDDELK,VDELK,<br>EEIVDKYDLFVGSQATDFGEALVR,IDD<br>DKDGFVTVDDELK,GHDLNEDGLVSWE<br>EYK,DIVVQETMEDIDK,NADGFIDLEEY<br>IGDMYSHDGN ADEPEWVK,VHND AQN<br>FDYDHDFAFLGAEAAK                                           |                                                                                                                                                                                                   |                                                                                             |
| IPI00673777.2 | A2AHC3 | Camsap1   | Isoform 1 of Calmodulin-regulated spectrin-associated protein 1 | VESLEALPILSR,ASLIEVDLSDLK,SSP<br>CLSTTSQLSSMSMASGSVK                                                                                                                                                                                                                                      |                                                                                                                                                                                                   |                                                                                             |
| IPI00670928.3 |        | Camsap111 | calmodulin regulated spectrin-associated protein 1-like 1       | QQLEAEMEHKK,GPPVSSLSLASLNTG<br>DSESVHSGK                                                                                                                                                                                                                                                  |                                                                                                                                                                                                   |                                                                                             |
| IPI00896727.1 | Q6ZQ38 | Cand1     | Cullin-associated NEDD8-dissociated protein 1                   | EVYPHVSTIINICLK,IDLRPVLGEG<br>VPILASFLR,LTLDIPETLLPR,TLED<br>PDLNVRRL,DLSDVLPFLYNETK,I<br>SGSILNELIGLVR,TVSPALIAR,AV<br>AALLTIPEAEK,LLALLSLGEVGHHI<br>DLSGQLELK,EGPAVVGQFIQDVK<br>,LGTLSALDILIK,SAASYALGSISV<br>GNLPEYLPFVLQEITSQPK                                                       | IDLRPVLGEGVPILASFLR,LTLDIP<br>ETLLPR,ISGSILNELIGLVR,SPLMSEF<br>QSQISSNPELAAIFESIQA,FTISDHP<br>QPIDPLLK,LSTLCPSAVLQR,ITSEA<br>LLVTQQLVK,EGPAVVGQFIQDVK,L<br>GTLSDILIK,QQGLLVNFHPSILTC<br>LLPQLTSPR |                                                                                             |
| IPI00119618.1 | P35564 | Canx      | Calnexin                                                        | LNKPFLFDTKPLIVQYEVNFQNGI<br>ECGGAYVK,IPNPdffedLEPFK,V<br>VDDWANDGWGLK,GSLSGWILS<br>K,RPDADLK,APVPTGEVYFADSF<br>DR,KPEDWDERPK,PEDWDERPK<br>,RDEEEEEKLEEK,AEDEILNR,<br>TAELSLDQFHDK,IADPDAVKPDD<br>WDEDAPSK,KIPNPdffedLEPFK<br>,SDASTPPSPK,TDAPQPDVKDEE<br>GKEEEK,DEEEEEKLEEK,KTDA<br>PQPDK | IPNPdffedLEPFK,VVDDWANDGW<br>GLK,TAELSLDQFHDK,IADPDAVKP<br>DDWDEDAPSK,LNKPFLFDTK,GSL<br>SGWILSK,SDASTPPSPK,APVPTGE<br>VYFADSFDR,KPEDWDERPK                                                        |                                                                                             |
| IPI00869430.1 | Q8BPT7 | Cap1      | Adenylyl cyclase-associated protein                             | LSDLLAPISEQIQEVITFR,LGLVFDDVV<br>GIVEIINSR                                                                                                                                                                                                                                                | HAEMVHTGLK,GAVPYVQAFDLSL<br>LANPVAEYLK,LSDLLAPISEQIQE<br>VITFR,SALFAQINQGESITHALK                                                                                                                 | HVDWVR,HAEMVHTGLK,GAVPYV<br>QAFDLSLANPVAEYLK,LSDLLAPIS<br>EQIQEVITFR,SALFAQINQGESITHA<br>LK |

|                |        |                                  |                                                                                                         |                                                                                                                                                                                                                  |                                                                                                      |                                                                                                                                                        |
|----------------|--------|----------------------------------|---------------------------------------------------------------------------------------------------------|------------------------------------------------------------------------------------------------------------------------------------------------------------------------------------------------------------------|------------------------------------------------------------------------------------------------------|--------------------------------------------------------------------------------------------------------------------------------------------------------|
| IPI00277930.6  | Capg   | Putative uncharacterized protein | AQVEIITDGEEPAEMIQVLGPK,YSPNT<br>QVEILPQGR,QAALQVADGFISR,EVQG<br>NESDLFMSYFPR,EGNPEEDITADQTN<br>AQAAALYK |                                                                                                                                                                                                                  |                                                                                                      |                                                                                                                                                        |
| IPI00757359.1  | Q60865 | Caprin1                          | Caprin-1                                                                                                | QFMAETQFSSGEK,SSGPPPPSGSSG<br>SEAAAGAAAPASQHPATGTGAVQTEA<br>MK,SFMALSQDIQK,TVLELQYVLDK,Q<br>GLSGVPILSEEELSLLEDFYK,LNEQYE<br>HASIHLWDLLEGK,YQEVTTNNLEFAK,P<br>SFSNTPNSGYSQSQFTAPR,GGYDGY<br>RPSFSNTPNSGYSQSQFTAPR | LNQDQLDAVSK,LGDDDVDR,SFM<br>ALSQDIQK,TVLELQYVLDK,GKLD<br>DYQER,LNEQYEHASIHLWDLLE<br>GK,YQEVTTNNLEFAK | SSGPPPPSGSSGSEAAAGAAAPAS<br>QHPATGTGAVQTEAMK,LNQDQLD<br>AVSK,TVLELQYVLDK,QGLSGVPIL<br>SEEELSLLEDFYK,YQEVTTNNLEFAK<br>,LNEQYEHASIHLWDLLEGK,PVCGT<br>TYK |
| IPI00330063.6  | P47753 | Capza1                           | F-actin-capping protein subunit alpha-1                                                                 | DVQDSVTVSNEVQTTK,EGAAHFAAQ<br>YNMDQFTPVK,IEGYDDQVLITEHGDL<br>GNSR,LLLNNNDNLLR,IQVHYEDGNV<br>QLVSHK                                                                                                               | FTITPPSAQVVGVLK,LLLNNNDNLLR                                                                          |                                                                                                                                                        |
| IPI00111265.3  | P47754 | Capza2                           | F-actin-capping protein subunit alpha-2                                                                 | IEGYEDQVLITEHGDLGNGK,FTVTPST<br>TQVVGILK,LLLNNNDNLLR,IQVHYEDG<br>NVQLVSHK                                                                                                                                        | FTVTPSTTQVVGILK,LLLNNNDNLL<br>R                                                                      | FTVTPSTTQVVGILK,LLLNNNDNLLR                                                                                                                            |
| IPI00474883.2  | A2AMV7 | Capzb                            | Capping protein (Actin filament) muscle<br>Z-line, beta                                                 |                                                                                                                                                                                                                  | RLPPQQIEK,NLSDLIDLVPSCEDLL<br>SSVDQPLK                                                               |                                                                                                                                                        |
| IPI00121534.11 | P00920 | Car2                             | Carbonic anhydrase 2                                                                                    | AVQQPDGLAVLGIFLK,QSPVDIDTATA<br>QHDPALQPLLLISYDK                                                                                                                                                                 | AVQQPDGLAVLGIFLK,YAAELHL<br>VHWNTK,IGPASQGLQK                                                        | AVQQPDGLAVLGIFLK,IGPASQGLQ<br>K,QSPVDIDTATAQHDPALQPLLLISY<br>DK                                                                                        |
| IPI00331422.4  | Q9ER72 | Cars                             | Isoform 1 of CysteinyI-tRNA synthetase,<br>cytoplasmic                                                  | FMNEFFLNVK,VLEVLQLSDALR                                                                                                                                                                                          |                                                                                                      |                                                                                                                                                        |
| IPI00409176.1  | P51125 | Cast                             | Isoform 1 of Calpastatin                                                                                | GVPEDAVETLAGSLGTR,LSAAISEV<br>VSQTPAPSTHAAAPLPGTEQK,FQDVP<br>SAGGESVAGGGTVATALDK,KVEEEVI<br>NDQALQALSDSLGTR,SGMDAALDDLI<br>DTLGGHEDTNR,SLSESELIGELSADF<br>DR,VEEEVINDQALQALSDSLGTR                               |                                                                                                      |                                                                                                                                                        |
| IPI00312058.5  | P24270 | Cat                              | Catalase                                                                                                | GPLLVDVFTDEMAHFDR,EAETFPF<br>NPFDLTK,FSTVAGESGSADTVR                                                                                                                                                             |                                                                                                      |                                                                                                                                                        |
| IPI00652341.1  | Q3U527 | Cbl                              | Casitas B-lineage lymphoma                                                                              | GTEPIVVDPFDPR,CEIKGTEPIVVDPF<br>DPR                                                                                                                                                                              |                                                                                                      |                                                                                                                                                        |
| IPI00844721.1  | Q9JIY2 | Cbl1                             | Isoform 1 of E3 ubiquitin-protein ligase<br>Hakai                                                       | RGPPPPPR,ASLENVHPPPIAPPPTDIPD<br>R                                                                                                                                                                               |                                                                                                      |                                                                                                                                                        |
| IPI00314191.6  | P48758 | Cbr1                             | Carbonyl reductase [NADPH] 1                                                                            | SETITEEELVGLMKN,EYGGDLVLVNN<br>AGIAFK,SPEEGAETPVYLALLPPDAEG<br>PHGQFVQDK                                                                                                                                         |                                                                                                      |                                                                                                                                                        |
| IPI00677454.2  | Q9DCC5 | Cbx3                             | Chromobox homolog 3                                                                                     | WKDSDEADLVLAK,VEEAPEEFVVEK<br>,IIGATDSSGELMFLMK,DSDEADLVLA<br>K,KVEEAPEEFVVEK                                                                                                                                    | CPQIVIAFYEER,GFTDADNTWEP<br>EENLDCPELIEAFLNSQK,IIGATD<br>SSGELMFLMK,KVEEAPEEFVVEK<br>EK              |                                                                                                                                                        |
| IPI00458723.2  | Q9D8X2 | Ccdc124                          | Coiled-coil domain-containing protein<br>124                                                            | EQLERK,AAFTAEEVQLPR,TVEDAIA<br>VLSVAEEADRHPR                                                                                                                                                                     |                                                                                                      |                                                                                                                                                        |

|               |          |         |                                                       |                                                                                                                           |                                                                                                                                                                                                                                                                                                                                                                                                              |
|---------------|----------|---------|-------------------------------------------------------|---------------------------------------------------------------------------------------------------------------------------|--------------------------------------------------------------------------------------------------------------------------------------------------------------------------------------------------------------------------------------------------------------------------------------------------------------------------------------------------------------------------------------------------------------|
| IPI00122137.6 | Q8C9M2-2 | Ccdc15  | Isoform 2 of Coiled-coil domain-containing protein 15 | AQNYLHNYQEQLQLQNQEVNSK,YQ<br>NQHFLPVDQEFLPR                                                                               |                                                                                                                                                                                                                                                                                                                                                                                                              |
| IPI00466468.2 | Q3UHY7   | Ccdc32  | coiled-coil domain containing 32                      | PWAPLHDSEVYLASLEK,LASEFFVDG<br>LDSDESTLEHFK                                                                               |                                                                                                                                                                                                                                                                                                                                                                                                              |
| IPI00133032.5 | Q9CR29   | Ccdc43  | Isoform 1 of Coiled-coil domain-containing protein 43 | KEDEVQAIATLIEK,EDEVQAIATLIEK                                                                                              |                                                                                                                                                                                                                                                                                                                                                                                                              |
| IPI00170090.5 | Q8C804   | Ccdc52  | Coiled-coil domain-containing protein 52              | EENSELINQLWTDIQQK,QEWDNTVN<br>DLTVHR,IAELTLQNSAIK,SNSEFSPLQ<br>DVLRL                                                      |                                                                                                                                                                                                                                                                                                                                                                                                              |
| IPI00381495.5 |          | Ccdc6   | coiled-coil domain containing 6                       | IDLENTLEQEQEALVNR,AELEQHLEQ<br>EQEFQVNK,EKETLAVNYEKEEEFLTN<br>ELSR,AEQEEEFISNTLFFK,EKIDLENTL<br>EQEQEALVNR,DISMEIDSPENMMR |                                                                                                                                                                                                                                                                                                                                                                                                              |
| IPI00468895.2 | Q6NS45   | Ccdc66  | Isoform 1 of Coiled-coil domain-containing protein 66 | TNEIYYLDPDAPLSR,SMTALLDPAQIE<br>ER,QKQLEHQKAIMAQVEENR                                                                     |                                                                                                                                                                                                                                                                                                                                                                                                              |
| IPI00229261.5 | Q3UFS4   | Ccdc75  | Coiled-coil domain-containing protein 75              | LQILTGYLR,SGDGIVEPIPLNVK                                                                                                  |                                                                                                                                                                                                                                                                                                                                                                                                              |
| IPI00378506.1 | Q8BYH3   | Ccdc76  | tRNA guanosine-2'-O-methyltransferase TRM13 homolog   |                                                                                                                           | DVPETWTPVAGIVIALCCHHR,GFS<br>PALQYYTDPLVSLLENVLLTAVPAHP<br>SSQEK,KIGHLCK                                                                                                                                                                                                                                                                                                                                     |
| IPI00844630.1 | Q6VGS5-2 | Ccdc88c | Isoform 2 of Protein Daple                            |                                                                                                                           | RLIDER,EKLHDVDFYK                                                                                                                                                                                                                                                                                                                                                                                            |
| IPI00123958.2 | Q923A2   | Ccdc99  | Protein Spindly                                       | LPPHREEESCLNSLK,VLSSMSSELLA<br>LELTAAEGVK                                                                                 |                                                                                                                                                                                                                                                                                                                                                                                                              |
| IPI00111207.1 | P24860   | Ccnb1   | G2/mitotic-specific cyclin-B1                         |                                                                                                                           | VLNFSLGRPLPLHFLR,VPVTVTAAS<br>KPGLRPR,ISTLAQLNCTLVQNLSK                                                                                                                                                                                                                                                                                                                                                      |
| IPI00752728.2 | Q3UUW5   | Ccnh    | Putative uncharacterized protein                      | FYLNNSVMEYHPR,YPMLENPEILR                                                                                                 |                                                                                                                                                                                                                                                                                                                                                                                                              |
| IPI00320217.9 | P80314   | Cct2    | T-complex protein 1 subunit beta                      | QVLLSAAEAAEVILR,DAALMVTNDGA<br>TILK                                                                                       | FWQDLMNIAGTTLSSK,GATQQIL<br>DEAER,LALVTGGEIASTFDHPEL<br>VK,LAVEAVLR,HGINCFINR,MLPT<br>IIADNAGYDSADLVAQLR,SLHDAL<br>CVLAQTVK,ILIAN TGMDTDK,GSG<br>NLEAIHVIK,GSGNLEAIHVIK,QLI<br>YNYPEQLFGAAGVMAIEHADFAG<br>VER,VQDDEVDGDTTSTVTLAAE<br>LLR,VAEIEHAEK,LIHFSGVALGEA<br>CTIVLR,LSSFIGAIAIGDLVK,AAHS<br>EGHITAGLDMK,EALLSSAVDHGS<br>DEAR,DAALMVTNDGATILK,LGG<br>SLADSYLDEGFLLDK,LIEEVMIGE<br>DK,NIGVDNPAAK,IGVNQPK |



|               |        |       |                                     |                                                                                              |                                                                                                                                                                                                                                                                                                                                                                                                |                                                                                                                                                                                                                                                                                  |
|---------------|--------|-------|-------------------------------------|----------------------------------------------------------------------------------------------|------------------------------------------------------------------------------------------------------------------------------------------------------------------------------------------------------------------------------------------------------------------------------------------------------------------------------------------------------------------------------------------------|----------------------------------------------------------------------------------------------------------------------------------------------------------------------------------------------------------------------------------------------------------------------------------|
| IPI00116283.1 | P80318 | Cct3  | T-complex protein 1 subunit gamma   | EDDVGTGAGLLEIK,TAVETAVLLLR                                                                   | TLIQNCGASTIR,IPGGIIEDSCVLR<br>,VQSGNINAANK,SMIEISR,EMMLSII<br>NSSITTK,ELGIWEPLAVK,IDDIVS<br>GHK,EIQVQHPPAAK,KGESQTDIEI<br>TR,IVLLDSSLEYK,NVLLDPQLVP<br>GGGASEMAVAHALTEK,IVSRPEE<br>LREDDVGTGAGLLEIK,ISTPVDVN<br>NR,TAVETAVLLLR,AVAQALEVIP<br>R,EILSEVER,ACTILLR,ILQMEEEE<br>IHQLCEDIIQLKPDVVITEK,KVQS<br>GNINAANK,TIADIIR                                                                      | TLIQNCGASTIR,IPGGIIEDSCVLR,M<br>ALDDMISTLK,VQSGNINAANK,WSSL<br>ACNIALDAVK,ELGIWEPLAVK,IDDI<br>VSGHK,EIQVQHPPAAK,KGESQTDIE<br>ITR,NVLLDPQLVPGGASEMAVAH<br>ALTEK,IVLLDSSLEYK,ISTPVDVNN<br>R,EDDVGTGAGLLEIK,AVAQALEVIP<br>R,ILQMEEEEYIHQLCEDIIQLKPDVVI<br>TEK,ACTILLR,IVSRPEELR     |
| IPI00116277.3 | P80315 | Cct4  | T-complex protein 1 subunit delta   |                                                                                              | GGISNILEEMVVQPLLVSVALTL<br>ATETVR,GDVTITNDGATILK,PVQ<br>LSDR,ETLLNSATTSLNSK,SGAPT<br>AGPGSR,AFADAMEVIPSTLAENA<br>GLNPSTVTELR,DVEREDIEFICK,<br>IGLIQFCLSAPK,ITGCTSPGK,AQ<br>DIEAGDGTTSVVIAGSLDSCCTK,<br>VIDPATATSVDLR,SIHDALCVIR,K<br>TGCNVLLIQK,DALSDLALHFLNK,<br>AYILNLVK,KGGISNILEEMVVQPL<br>LVSVALTLATETVR,LVIEEAER,<br>GIHPTIISESFQK,MPENVASRSGA<br>PTAGPGSR,ALIAGGGAPEIELAL<br>R,VANSGITR | GDVTITNDGATILK,QMQVLHPPAA,<br>PVQLSDR,SGAPTAGPGSR,TGCNV<br>LLIQK,ETLLNSATTSLNSK,AFADAM<br>EVIPSTLAENAGLNPSTVTELR,VID<br>PATATSVDLR,SIHDALCVIR,LGGTI<br>DDCELVEGLVLTQK,IDDVVNTR,AYI<br>LNLVK,LVIEEAER,GIHPTIISESFQK,<br>VANSGITR,ALIAGGGAPEIELALR                                 |
| IPI00116279.3 | P80316 | Cct5  | T-complex protein 1 subunit epsilon | GSNDMQYQHVIETLIGK,DGDVTITND<br>GATILSMMDVDHQIAK,VLVDINNPEPL<br>IQTAK,WVGGPEIELIAIATGGR       | IADGYEQAAR,ETGANLAICQWGF<br>DDEANHLLQLNGLPAVR,AVTIFIR<br>,AFADALEVIPMALSENSGMNPIQ<br>TMTEVR,LGFAGVVQEISFGTTK,<br>VLVDINNPEPLIQTAK,LMVELSK,<br>WVGGPEIELIAIATGGR,IAIQHLD<br>K,SQDDEIGDGTGVVVLGALLE<br>EAEQLLDR,IAILTCPFEPPKPK                                                                                                                                                                   | ETGANLAICQWGFDEANHLLLQN<br>GLPAVR,AFADALEVIPMALSENSG<br>MNPIQTMTEVR,LGFAGVVQEISFG<br>TTK,FSELTSEK,WVGGPEIELIAIAT<br>GGR,IAIQHLDK,QQISLATQMVR,SQ<br>DDEIGDGTGVVVLGALLEEAEQL<br>LDR,IAILTCPFEPPKPK,IADGYEQA<br>AR,VVYGGGAAEISCALAVSQEADK,<br>SHIMAAK,LMGLEALK,VLVDINNPE<br>PLIQTAK |
| IPI00116281.3 | P80317 | Cct6a | T-complex protein 1 subunit zeta    | AQAALAVNISAAR,KKDEPIDLFMVEIM<br>EMK,GIDPFSLDALAK,VHAELADVLTE<br>AVVDSILAIR,AQLGVQAFADALLIIPK | GLVLDHGAR,GIDPFSLDALAK,VA<br>TAQDDITGDGTSSNVLIIGELLK,A<br>QLGVQAFADALLIIPK,IITEGFEEA<br>K,FTFIEK,ALQFLEQVK,HTLTQIK,<br>AQAALAVNISAAR,SVTLLVK,GFV<br>VINQK,NAIDDGCVVPGAGAVEVA<br>LAEALIK,VLAQNSGFDLQETLVK,<br>VHAELADVLTEAVVDSILAIR,GLQ<br>DVLRL,MLVSGAGDIK                                                                                                                                     | GLVLDHGAR,TEVNSGFFYK,GIDPF<br>SLDALAK,AQLGVQAFADALLIIPK,II<br>TEGFEEAK,ALQFLEQVK,HTLTQIK,<br>AQAALAVNISAAR,SVTLLVK,KQLLH<br>SCTVIATNILLVDEIMR,NAIDDGCVV<br>PGAGAVEVALAEALIK,VHAELADVL<br>TEAVVDSILAIR,VLAQNSGFDLQET<br>LVK,QADLYISEGLHPR,GLQDVLRL,<br>MLVSGAGDIK                 |

|               |          |          |                                                       |                                                                                                                                                                                                                                                                                                                                                                           |                                                                                                                                                                                                                                                                                                                      |
|---------------|----------|----------|-------------------------------------------------------|---------------------------------------------------------------------------------------------------------------------------------------------------------------------------------------------------------------------------------------------------------------------------------------------------------------------------------------------------------------------------|----------------------------------------------------------------------------------------------------------------------------------------------------------------------------------------------------------------------------------------------------------------------------------------------------------------------|
| IPI00331174.5 | P80313   | Cct7     | T-complex protein 1 subunit eta                       | MVVDVAVMMLDELLQLK,TATQLA<br>VNK,IALLNVELELK,INALTAASEA<br>ACLIVSVDETIK,TCTIILR,ATISND<br>GATILK,SQDAEVDGDTTSVTLA<br>AEFLK,INALTAASEAACLIVSVDE<br>TIKNPR,LPIGDVATQYFADR,VQG<br>GALEESQLVAGVAFK,ALEIIPR,SL<br>HDAIMIVR                                                                                                                                                      | MVVDVAVMMLDELLQLK,TATQLAVN<br>K,LLDVVHPPAAK,YNFFTGCQPK,QLC<br>DNAGFDATNILNK,EGTDSSSQGIPQL<br>VSNISACQVIAEAVR,VHTVEDYQAI<br>VDAEWNILYDK,INALTAASEAACLIV<br>SVDETIK,ATISNDGATILK,LPIGDVA<br>TQYFADR,VQGGALEESQLVAGVAF<br>K,QVKPYVEEGLHPQIIR,ALEIIPR,S<br>LHDAIMIVR                                                     |
| IPI00469268.5 | P42932   | Cct8     | T-complex protein 1 subunit theta                     | KFAEAFEAIIPR,VDQIIMAK,AHEIL<br>PELVCCSAK,ELEVQHPPAAK,GST<br>DNLMDDIER,DVDEVSSLLR,FAE<br>AFEAIIPR,ALAENSGVK,HFSGLEE<br>AVYR,APGFAQMLK,VADIALHYA<br>NK,IGLSVSEVISGYEIAACK,NVGL<br>DIEAEVPAVK,ILGSGIYSSSVLHG<br>MVFK,IAVYSCPFDMITETK,YN<br>MLVR,GEENLMDAQVK,LFVTNDA<br>ATILR,ETEGDVTSVK,LATNAAVT<br>VLR,LYSVHQEGNK,AIAGTGANVI<br>VTGGK,ANEVISK,AVDDGVNTFK,<br>LVPGGGATEIELAK | ILGSGIYSSSVLHGMVFK,AHEILPEL<br>VCCSAK,IAVYSCPFDMITETK,QIT<br>SYGETCPGLEQYAIK,ELEVQHPPAA<br>K,DVDEVSSLLR,FAEAFEAIIPR,LFV<br>TNDAAATILR,YNIMLVR,HFSGLEEAV<br>YR,APGFAQMLK,VADIALHYANK,LA<br>TNAAVTVLR,NVGLDIEAEVPAVK,T<br>VGATALPK,IGLSVSEVISGYEIAACK<br>,LYSVHQEGNK,AIAGTGANVITGG<br>K,LVPGGGATEIELAK,EDGAISTIVL<br>R |
| IPI00268688.3 | Q9JLQ0   | Cd2ap    | CD2-associated protein                                | LGLFPSNFVK,VNTAAFLTPELAK                                                                                                                                                                                                                                                                                                                                                  |                                                                                                                                                                                                                                                                                                                      |
| IPI00109203.3 | Q9CWK3   | Cd2bp2   | CD2 antigen cytoplasmic tail-binding protein 2        | VTFQGVGDEDEGEDEISVPK,KVTFQGV<br>GDEDEGEDEISVPK                                                                                                                                                                                                                                                                                                                            |                                                                                                                                                                                                                                                                                                                      |
| IPI00169700.4 | Q76KJ5   | Cd3eap   | DNA-directed RNA polymerase I subunit RPA34           | TMEPVAELPVPSATSSK,FSAFGGSP<br>VTGPGSASALR,RVGETEALPDDFEP<br>QGALAPSK,VGETEALPDDFEPQAL<br>APSK                                                                                                                                                                                                                                                                             | VPLQLIPTSLPPQIPAGLRPR,TMEP<br>VAELPVPSATSSK,FSAFGGSPPV<br>TGPGSASALR                                                                                                                                                                                                                                                 |
| IPI00114491.1 | P11440   | Cdc2a    | Cell division control protein 2 homolog               | HPYFDDLDNQIK,KPLFHGDSEIDQLFR<br>,DLKPQNLLIDDK,IRLESEEEGVPSTAI<br>R,NLDENGLDLLSK,HPNIVSLQDVL<br>MQ<br>DSR                                                                                                                                                                                                                                                                  | YSTPVDIWSIGTIFAELATK,VYTH<br>EVVTLWYR<br>YSTPVDIWSIGTIFAELATK,IGEGTY<br>GVVYK,WKPGSLASHVK                                                                                                                                                                                                                            |
| IPI00117087.1 | Q61081   | Cdc37    | Hsp90 co-chaperone Cdc37                              | ELEVAESDGQVELER,KLKELEVAESD<br>GQVELER,NMPWNVDTLTK,LGPGGL<br>DPVEVYESLPEELQK,EGEEAGPGDPL<br>LEAVPK                                                                                                                                                                                                                                                                        | YLSDNVHLVCEETANYLVIWCIDLE<br>VEEK,LGPGGLDPVEVYESLPEELQ<br>K                                                                                                                                                                                                                                                          |
| IPI00113849.1 | P60766-2 | Cdc42    | Isoform 2 of Cell division control protein 42 homolog | TPFLLVGTQIDLR,YVECSALTQK                                                                                                                                                                                                                                                                                                                                                  |                                                                                                                                                                                                                                                                                                                      |
| IPI00124906.1 | Q9JM96   | Cdc42ep4 | Cdc42 effector protein 4                              | DQWGSEEEEEAGGYR,DSSSLSSYTS<br>GVLEER,ADLTAEMISAPLGDFR,DKEG<br>PSSIVQAPPVLEVPPLGR,AGDAFGD<br>TSFLTSTK                                                                                                                                                                                                                                                                      |                                                                                                                                                                                                                                                                                                                      |

|               |        |          |                                                       |                                                                                                                                                                                                                                                                                                                                                                                                                                                                                                                                                                      |                                                                                                                      |
|---------------|--------|----------|-------------------------------------------------------|----------------------------------------------------------------------------------------------------------------------------------------------------------------------------------------------------------------------------------------------------------------------------------------------------------------------------------------------------------------------------------------------------------------------------------------------------------------------------------------------------------------------------------------------------------------------|----------------------------------------------------------------------------------------------------------------------|
| IPI00284444.5 | Q6A068 | Cdc5l    | Cell division cycle 5-related protein                 | GVDYNAEIPFEK,LGLLGLPAPK,TEWS<br>REEEKLLHLAK,DKLNINPEDGMADY<br>SDPSYVK,PARPDPIDMDELEMLSE<br>AR,ESDLPSAILQTSQVSEFTK,PSEVN<br>ETILRPLNVEPPLTDLQK,NDFEIVLPE<br>NAEK,LVLPAPQISDAELQEVVK,QLND<br>LWDQIEQAHLER,AQDALVQEMEVV<br>K,ILQEAQNLMALTNVDTPLK,QTAEES<br>GITNSASSTLLSEYNVTNNSIALR,SKL<br>VLPAPQISDAELQEVVK,KKESDLPSAI<br>LQTSQVSEFTK,KPALGFYDTSEENYQ<br>ALDADFR,KPALGFYDTSEENYQALDA<br>DFRK,WYEWLDPSIK,DLPRPSEVNETI<br>LRPLNVEPPLTDLQK,GGLNTPHESD<br>FSGVTPQR,NVGFATNNSHITYLEHS<br>PYEK,RGVDYNAEIPFEK,EIDDTYIEDA<br>ADVDAR,NDFEIVLPENAEKELEER,LNI<br>NPEDGMADYSDPSYVK | VGQASEVAR,IASLLHR,RLAALQK,E<br>SDLPSAILQTSQVSEFTK,GGLNTPH<br>HESDFSGVTPQR,LVLPAPQISDAEL<br>QEVVK,LGLLGLPAPK,AAGIEIQK |
| IPI00170345.1 | Q8JZM7 | Cdc73    | Parafibromin                                          | SFVDAEVDVTR,TDLDDDITALK,KTQT<br>PAAQPVPR,NIFAILQSVK,GDEVIFGEF<br>SWPK,DQMMPGGTAISVTPYR,HLDR<br>PVFLR,TPIIIIPAATSLITMLNAK                                                                                                                                                                                                                                                                                                                                                                                                                                             | RAATENIPVVR,IEDEECVR,TPIIIIPA<br>ATSLITMLNAK                                                                         |
| IPI00228728.5 | Q14B71 | Cdca2    | Isoform 1 of Cell division cycle-associated protein 2 | ECVLNNSSENDVFR,KEDLLEYQQSGFP<br>VNSSSK                                                                                                                                                                                                                                                                                                                                                                                                                                                                                                                               |                                                                                                                      |
| IPI00318626.1 | P09803 | Cdh1     | Cadherin-1                                            |                                                                                                                                                                                                                                                                                                                                                                                                                                                                                                                                                                      | GLDARPEVTR,VFYSITGQGADKP<br>PVGVFIIER                                                                                |
| IPI00468999.4 | Q99L43 | Cds2     | Phosphatidate cytidyltransferase 2                    |                                                                                                                                                                                                                                                                                                                                                                                                                                                                                                                                                                      | AETAPLPTSVDDTPEVLNR,LQEY<br>NIPGVIQSAIGWK                                                                            |
| IPI00227808.3 | Q4VAA2 | Cdv3     | Isoform 1 of Protein CDV3                             | TPQGPPEIYSDTQFPSLQSTAK,LQLD<br>NQYAVLENQK,KTPQGPPEIYSDTQFP<br>SLQSTAK                                                                                                                                                                                                                                                                                                                                                                                                                                                                                                | TPQGPPEIYSDTQFPSLQSTAK,AA<br>NAASGAGGSSAAAGSR,PGDGGSL<br>GSGAR                                                       |
| IPI00132346.2 | Q78Y72 | Ceacam14 | CEA-related cell adhesion molecule 14                 | NDTGLYTLRTISVDLKEWAIIEVQVNS<br>K,SVPIAVEGENVLLFVHNLPK                                                                                                                                                                                                                                                                                                                                                                                                                                                                                                                |                                                                                                                      |
| IPI00356898.4 | Q569L8 | Cenpj    | Centromere protein J                                  | DSVLTSK                                                                                                                                                                                                                                                                                                                                                                                                                                                                                                                                                              |                                                                                                                      |
| IPI00225036.3 | Q3TJM4 | Cenpt    | Centromere protein T                                  | QLVNAGALLQDLEDNSLASALPGDSH<br>R,LRLSVFQQEVDQGLPLSQEPR                                                                                                                                                                                                                                                                                                                                                                                                                                                                                                                |                                                                                                                      |
| IPI00466518.2 | Q8BT07 | Cep55    | Isoform 1 of Centrosomal protein of 55 kDa            | QLHGFTITEQPFPLQR,SPSAALNDSL<br>VECPKCSVQYPATEHR                                                                                                                                                                                                                                                                                                                                                                                                                                                                                                                      |                                                                                                                      |
| IPI00128741.1 | Q9R1K9 | Cetn2    | Centrin-2                                             | DGDGEVNEQEFLR,LFDDDETGKISFK,<br>MNFSDFLTVMTQK,ELGENLTDEELQE<br>MIDEADR,EAFDLFDADGTGTIDIK                                                                                                                                                                                                                                                                                                                                                                                                                                                                             |                                                                                                                      |
| IPI00114065.1 | P04186 | Cfb      | Complement factor B                                   | DMEDLENVYQMIDETK,DFHINLFQVL<br>PWLK                                                                                                                                                                                                                                                                                                                                                                                                                                                                                                                                  |                                                                                                                      |

|               |        |         |                                                                                    |                                                                                                                                                                                        |                                                                                                                                                                                                                                                                                                                                               |                                                                                                                  |
|---------------|--------|---------|------------------------------------------------------------------------------------|----------------------------------------------------------------------------------------------------------------------------------------------------------------------------------------|-----------------------------------------------------------------------------------------------------------------------------------------------------------------------------------------------------------------------------------------------------------------------------------------------------------------------------------------------|------------------------------------------------------------------------------------------------------------------|
| IPI00890117.1 | P18760 | Cfl1    | Cofilin-1                                                                          | LGGSAVISLEGK,LGGSAVISLEGKPL,<br>KLTGIK,VFNDMK,MIYASSK,EILVGDV<br>GQTVDDPYTTFFVK,KSSTPEEVKK,YAL<br>YDATYETK,KEDLVFIFWAPENAPLK,NI<br>ILEEGKEILVGDVGGQTVDDPYTTFFVK,K<br>SSTPEEVK,NIILEEGK | AVLFCLSEDKK,LGGSAVISLEGK<br>PL,KAVLFCLSEDKK,HELQANCY<br>EEVKDR,HELQANCYEEVK,AVLF<br>CLSEDK,EILVGDVGGQTVDDPYTT<br>FVK,EDLVFIFWAPENAPLK,YALY<br>DATYETK,NIILEEGKEILVGDVGGQ<br>TVDDPYTTFFVK,KEDLVFIFWAPE<br>NAPLK,NIILEEGK                                                                                                                       | LGGSAVISLEGK,LGGSAVISLEGKP<br>L,VFNDMK,HELQANCYEEVK,EILV<br>GDVGGQTVDDPYTTFFVK,YALYDATY<br>ETK,KEDLVFIFWAPENAPLK |
| IPI00266188.6 | P45591 | Cfl2    | Cofilin-2                                                                          | VFNDMK,QILVGDIGDTVEDPYTSFVK,<br>MIYASSK,KEDLVFIFWAPESAPLK,YAL<br>YDATYETK                                                                                                              |                                                                                                                                                                                                                                                                                                                                               |                                                                                                                  |
| IPI00133562.1 | Q9CRB9 | Chchd3  | Coiled-coil-helix-coiled-coil-helix domain-<br>containing protein 3, mitochondrial |                                                                                                                                                                                        | VAEELALEQAK,LSENVIDR                                                                                                                                                                                                                                                                                                                          |                                                                                                                  |
| IPI00107999.1 | P40201 | Chd1    | Chromodomain-helicase-DNA-binding<br>protein 1                                     |                                                                                                                                                                                        | LVIAHEDELIPLHK,VLIFSQMVR                                                                                                                                                                                                                                                                                                                      |                                                                                                                  |
| IPI00857771.1 |        | Chd4    | MKIAA4075 protein                                                                  | VGGNIEVLGFNAR,FGTEELFKDEATD<br>GGGDNK,AAYLNMSEDPSPSMALNT<br>R,WSMPELAEVEENKMSQPGSPSPK<br>,YAILNEPFK,SAVDLTPIVVEDK,GGGN<br>QVSLLNVMMDLK,ENEFSFEDNAIR                                    | FAEVECLAESHQHLSK,VGGNIEV<br>LGFNAR,NFEALNAR,GPFLVSAP<br>LSTIINWER,NDKDKPLPPLLAR,H<br>HYEQQQEDLAR,KLERPPETPTV<br>DPTVK,LLEQALVIEEQLR,GGGN<br>QVSLLNVMMDLK,FNAPGAQQFC<br>FLLSTR,TVQTAVFLYSLYK,FHNL<br>EGFLEEFADIAK,LLLTGTPLQNNL<br>EELFHLLNFLTPER,APEPPPQQV<br>AQQQ,YAILNEPFK,RHDYWLLAGI<br>INHGYAR,GTTEVEKVEEK,VAQY<br>VVR,IEENSLKEEESTEKEKEVK | LLLTGTPLQNNLEELFHLLNFLTPER<br>,GSSGASVAAAAAAVAVVESMVTA<br>TEVAPPPPPVEVPIR,GPFLVSAPLS<br>TIINWER,HHYEQQQEDLAR     |
| IPI00345676.5 | A2AJK6 | Chd7    | Isoform 1 of Chromodomain-helicase-<br>DNA-binding protein 7                       |                                                                                                                                                                                        | VLIFSQMVR,SLLIGVFK                                                                                                                                                                                                                                                                                                                            |                                                                                                                  |
| IPI00119020.1 | Q9DB34 | Chmp2a  | Charged multivesicular body protein 2a                                             | KAEATASALADADADLEER,AEATASA<br>LADADADLEER                                                                                                                                             |                                                                                                                                                                                                                                                                                                                                               |                                                                                                                  |
| IPI00134017.1 | Q9D1P4 | Chordc1 | Cysteine and histidine-rich domain-<br>containing protein 1                        |                                                                                                                                                                                        | HNSEKPPPEPVKPEVK,LSSGSEE<br>DKKEEDSDEIK                                                                                                                                                                                                                                                                                                       |                                                                                                                  |
| IPI00187301.1 | Q8WTY4 | Ciapi1  | Anamorsin                                                                          |                                                                                                                                                                                        | KPNFEVGSSSGLK,ILRPGGCLFL<br>K,ESSFDVILSGVVPGSTLSHSAE<br>VLAEMAR                                                                                                                                                                                                                                                                               | RPDPASLK,LQELTGSEGVFMENV<br>TQLLQSSHK,ILRPGGCLFLK                                                                |
| IPI00128346.1 | Q91WS0 | Cisd1   | CDGSH iron sulfur domain-containing<br>protein 1                                   |                                                                                                                                                                                        | AMVNLQIQK,VVHAFDMEDLGDK                                                                                                                                                                                                                                                                                                                       |                                                                                                                  |
| IPI00470092.2 | Q3V1H1 | Ckap2   | Cytoskeleton-associated protein 2                                                  |                                                                                                                                                                                        |                                                                                                                                                                                                                                                                                                                                               | IEPITSPIENIISIYEK,RPPHSVVTQA<br>EPK                                                                              |
| IPI00223047.2 | Q8BMK4 | Ckap4   | Cytoskeleton-associated protein 4                                                  |                                                                                                                                                                                        | VGAHGSEEGAVFK,KPPAAPQQP<br>QPPAPHPQHPQNAHR,IETNE<br>NNLESAK,VQSLQATFGTFESLLR                                                                                                                                                                                                                                                                  | VGAHGSEEGAVFK,KPPAAPQQP<br>PPAPHPQHPQNAHR                                                                        |

|               |        |        |                                                                         |                                                                                                       |                                                                                                                                                                                                   |                                                                                                                                                        |
|---------------|--------|--------|-------------------------------------------------------------------------|-------------------------------------------------------------------------------------------------------|---------------------------------------------------------------------------------------------------------------------------------------------------------------------------------------------------|--------------------------------------------------------------------------------------------------------------------------------------------------------|
| IPI00337930.4 | A2AGT5 | Ckap5  | Isoform 1 of Cytoskeleton-associated protein 5                          |                                                                                                       | TTGEVSGVVSK,EALEAVEVLVK,GLEAALVYVENAHVAGK,NAALNTIVTVYNVHGDQVFK,EGLDEVAGIINEAK,IIVACIETLR,LFAIEIYR                                                                                                 | ILVQQTLNILQQLAVAMGANIR,QDDRPPLTSLLSKPAIPPVASSTDMLHSK                                                                                                   |
| IPI00136703.1 | Q04447 | Ckb    | Creatine kinase B-type                                                  | FPAEDEFDLSSHNNHMAK,GTGGVDTAAVGGVFDVSNADR,VISMQKGGNMKEVFTR,LGFSEVELVQMVDGVK,DLFDPIIEER,LEQQQAIDDLMPAQK | HGGYQPSDEHK,GTGGVDTAAVGGVFDVSNADR,FCTGLTQIETLFK,LAVEALSSLDGDLGSR,NYEFMWNPHLGYILTCPSNLGTGLR,LGFSEVELVQMVDGVK,VLTPELYAELR,DLFDPIIEER,SMTEAEQQQLIDDHFLFDKPVSPLLLASGMAR,TFLVWINEEDHLR,LEQQQAIDDLMPAQK | TDLNPDNLQGGDDLDPNYVLSSR,GTGGVDTAAVGGVFDVSNADR,LGYILTCPSNLGTGLR,FCTGLTQIETLFK,PVSPLLLASGMAR,GIWHNDNK,GFCLPPHCSR,LAVEALSSLDGDLGSR,VLTPELYAELR,DLFDPIIEER |
| IPI00415523.1 | Q9ET38 | Cldn19 | Isoform 1 of Claudin-19                                                 |                                                                                                       |                                                                                                                                                                                                   | QSSYAGDAIITAVGLYEGLWMSCASQSTGQVQCK,ALMVAVLLGFVAMVLSVVGMK                                                                                               |
| IPI00130344.3 | Q9Z1Q5 | Clic1  | Chloride intracellular channel protein 1                                |                                                                                                       |                                                                                                                                                                                                   | FLDGNELTLADCNLLPK,LAALNPESNTSGLDIFAK,LHIVQVVK                                                                                                          |
| IPI00135977.3 | Q9QYB1 | Clic4  | Chloride intracellular channel protein 4                                |                                                                                                       | NSRPEANEALER,GVVFSVTTVDLK                                                                                                                                                                         |                                                                                                                                                        |
| IPI00119808.1 | Q9JHS4 | Clpx   | ATP-dependent Clp protease ATP-binding subunit clpX-like, mitochondrial | TLVQILTEPR,AQQGIVFLDEVDK                                                                              |                                                                                                                                                                                                   |                                                                                                                                                        |

|               |        |       |                                                    |                                                                                                                                                                                                                                                                                                                                                                                                                                                                                                                                                                                                                                                                                                                                                                                                                                                                                                                                                                                                                                                                                                                                                                                                                                                                                                                                                                                                                                                                                                                                                                                                                                                                                                                                                                                                                                                                                                                                                                                                                                   |                                                                                 |
|---------------|--------|-------|----------------------------------------------------|-----------------------------------------------------------------------------------------------------------------------------------------------------------------------------------------------------------------------------------------------------------------------------------------------------------------------------------------------------------------------------------------------------------------------------------------------------------------------------------------------------------------------------------------------------------------------------------------------------------------------------------------------------------------------------------------------------------------------------------------------------------------------------------------------------------------------------------------------------------------------------------------------------------------------------------------------------------------------------------------------------------------------------------------------------------------------------------------------------------------------------------------------------------------------------------------------------------------------------------------------------------------------------------------------------------------------------------------------------------------------------------------------------------------------------------------------------------------------------------------------------------------------------------------------------------------------------------------------------------------------------------------------------------------------------------------------------------------------------------------------------------------------------------------------------------------------------------------------------------------------------------------------------------------------------------------------------------------------------------------------------------------------------------|---------------------------------------------------------------------------------|
| IPI00648173.1 | Q5SXR6 | Cltc  | Clathrin, heavy polypeptide                        | <p>NLQNLILTAIK,HDVVFLITK,LEKH<br/>         ELIEFR,GQCDELEINVCNENSLFK<br/>         ,FQEHLQLQNLGINPANIGFSTLT<br/>         MESDK,NNLAGAEELFAR,YIQAA<br/>         CK,GYFEELITMLEAALGLER,LDN<br/>         YDAPDIANIAISNELFEEAFAIFR,G<br/>         QFSTDELVAEVEK,LPVVIGLLD<br/>         VDCSESVIK,SVNESLNNLFITEED<br/>         YQALR,TLQIFNIEMK,VANVELYY<br/>         K,ISGETIFVTAPHEATAGIIGVNR,<br/>         AHMGMFTELAILYSK,KVSQPIEG<br/>         HAASFAQFK,LECSEELGDLVK,A<br/>         YEFAER,ECFGACLFICYDLLRPD<br/>         VVLETAWR,EDKLECSEELGDLV<br/>         K,LAELEEFINGPNNNAHIQVVGDR,<br/>         FNALFAQGNYSEAAK,DTLAEEL<br/>         TQDPEEVSVTVK,FQSVPAQPGQTS<br/>         LQWFLQEEK,AHIAQLCEK,RKDP<br/>         PLLQYFGILLDQGQLNK,LDASESLR<br/>         ELWGSVLLSNPYR,LLLPWLEAR,<br/>         IHEGCEEPATHNALAK,AFMTADLP<br/>         ,IVLNSVFSEHR,YESLELCRPVL<br/>         NELIELLEK,HSSLAGCQIINYR,NNR<br/>         QQGR,IAAYLFK,YHEQLSTQSLIE<br/>         PSEGPLQTR,AHIAQLCEK,VIQCFA<br/>         LFESFK,GQVLSVCVEEENIIPYIT<br/>         ETGQVQK,TSIDAYDNFDNISLAQR,<br/>         NVLQNPDLALR,KFDVNTSAVQVL<br/>         ELGDLVK,LASTLVHLGEYQAAVDG<br/>         IEHIGNLDR,EKVGQAQVVIDMN<br/>         AR,LLYNNVSNFGR,LLLPWLEAR,N<br/>         DPSNPIR,RPISADSAIMNPASK,K<br/>         NLAGAEELFAR,LHIEVGTPTGNQ<br/>         DPFLWGSVLLSNPYR,RPLIDQV<br/>         PFPK,LDNYDAPDIANIAISNELFEEA<br/>         VQTALSETQDPEEVSVTVK,ESYV<br/>         FAIFR,PVLQQGR<br/>         ETELIFALAK,VSQPIEGHAASFAQ<br/>         FK,AFMTADLPNELIELLEK,EVCF<br/>         ACVDGK,NLILVVR,VIQFAETGQ<br/>         VQK,TSIDAYDNFDNISLAQR,LTD<br/>         QLPLIIVCDR,LASTLVHLGEYQAA<br/>         VDGAR,LLYNNVSNFGR,VGEQA<br/>         QVVIDMNDPSNPIR,HELIEFR,LH<br/>         IIEVGTPTGNQPFPK,DFVHDLV<br/>         LYLVR,VDKLDASESLR,IYIDSNN<br/>         NPER,GQFSTDELVAEVEKR,KGQ<br/>         VLSVCVEEENIIPYITNVLQNPDLA<br/>         LR,ALEHFTDLYDIK,FQSVPAQPG<br/>         QTSPLLQYFGILLDQGQLNK,IHE<br/>         GCFEPATHNALAK,KVGYTPDWIF</p> |                                                                                 |
| IPI00330767.1 | P53996 | Cnbp  | Isoform 1 of Cellular nucleic acid-binding protein |                                                                                                                                                                                                                                                                                                                                                                                                                                                                                                                                                                                                                                                                                                                                                                                                                                                                                                                                                                                                                                                                                                                                                                                                                                                                                                                                                                                                                                                                                                                                                                                                                                                                                                                                                                                                                                                                                                                                                                                                                                   | GFQFVSSSLPDCYR,CGETGHVAIN<br>CSK,TSEVNCYR                                       |
| IPI00315879.1 | Q9D1A2 | Cndp2 | Cytosolic non-specific dipeptidase                 | YPSLSLHGIEGAFSGSGAK,MLAAYLY<br>EVSQK,LVPDPIPEVSEQVSSYLSK                                                                                                                                                                                                                                                                                                                                                                                                                                                                                                                                                                                                                                                                                                                                                                                                                                                                                                                                                                                                                                                                                                                                                                                                                                                                                                                                                                                                                                                                                                                                                                                                                                                                                                                                                                                                                                                                                                                                                                          | MMEVAADVQR,LVPDPIPEVSE<br>QVSSYLSK,DVDYVCISDNWLGKN<br>KPCITYGLR,LPDGSEIPLPILLGK |
| IPI00116649.1 | Q08093 | Cnn2  | Calponin-2                                         | GPSYGLSAEVK,SWIEGLTGLSIGPDF<br>QK,SMQNWHLLENLSNFIK                                                                                                                                                                                                                                                                                                                                                                                                                                                                                                                                                                                                                                                                                                                                                                                                                                                                                                                                                                                                                                                                                                                                                                                                                                                                                                                                                                                                                                                                                                                                                                                                                                                                                                                                                                                                                                                                                                                                                                                |                                                                                 |
| IPI00119111.2 | Q9DAW9 | Cnn3  | Calponin-3                                         | GPSYGLSAEVK,CASQAGMTAYGTRR,<br>MQTDPKPFQTTISLQMGTKN,LTLQPV<br>DGIILCELINK,GFHTTIDIGVK<br>DNSTISLQMGTKN                                                                                                                                                                                                                                                                                                                                                                                                                                                                                                                                                                                                                                                                                                                                                                                                                                                                                                                                                                                                                                                                                                                                                                                                                                                                                                                                                                                                                                                                                                                                                                                                                                                                                                                                                                                                                                                                                                                            | GPSYGLSAEVK,LTLQPVNDSTISLQ<br>MGTKN,VNESLNPWPLENIGNFIK,<br>GFHTTIDIGVK          |

|               |          |        |                                                               |                                                                                                                                                                                                                             |                                                                                                                                                   |
|---------------|----------|--------|---------------------------------------------------------------|-----------------------------------------------------------------------------------------------------------------------------------------------------------------------------------------------------------------------------|---------------------------------------------------------------------------------------------------------------------------------------------------|
| IPI00880243.1 | Q6ZQ08-4 | Cnot1  | Isoform 4 of CCR4-NOT transcription complex subunit 1         |                                                                                                                                                                                                                             | SLLLEAYVK,YLFLNAIANQLR,ILD<br>VAQDLK,AVQELVHPVVDR,SLLE<br>VVVLSR,DAIAALGLLQK,LIALLVK,<br>NKPIHTDLDVK,YNVEAVELLIR                                  |
| IPI00221683.3 | Q8BH15   | Cnot10 | Isoform 1 of CCR4-NOT transcription complex subunit 10        | QDINK                                                                                                                                                                                                                       | FIPAPPSSPLR,KFSGRPMCTLLT<br>NK                                                                                                                    |
| IPI00410930.3 | Q8BT14-3 | Cnot4  | Isoform 3 of CCR4-NOT transcription complex subunit 4         | KPYPEDPAVYKPLSQEELQR,SPFEGA<br>VTESQSLFSDNFR,QPEDDLGDFPFDV<br>TR,ELSVQDQPSLSPTSLQNASSHTTT<br>AK                                                                                                                             |                                                                                                                                                   |
| IPI00319602.3 | P16330   | Cnp    | Isoform CNPII of 2',3'-cyclic-nucleotide 3'-phosphodiesterase |                                                                                                                                                                                                                             | PSASEGLPPGSR,RPPGVLHCTTK                                                                                                                          |
| IPI00135512.1 | Q9QXT0   | Cnpy2  | Protein canopy homolog 2                                      | INPDGSQSVVEVPYAR,ALVDELEWEI<br>AR                                                                                                                                                                                           |                                                                                                                                                   |
| IPI00875961.1 | Q8BQ47   | Cnpy4  | Protein canopy homolog 4                                      | LLSMELQEALSRTGR,LLSMELQEALS<br>R,EVLELQQLVLDTGKR,SREVLELQGV<br>LDTGKR,EVLELQQLVLDTGK,ISDGQEE<br>ADDEEEEEEEITK                                                                                                               |                                                                                                                                                   |
| IPI00551146.5 | Q8CB62   | Cntrob | Isoform 1 of Centrobilin                                      | VLELQQQLAVAVAADHK,LQALQEEG<br>QAQLER,DGLNLDVSELLR                                                                                                                                                                           |                                                                                                                                                   |
| IPI00330247.4 | Q5NBX1   | Cobl   | Isoform 1 of Protein cordon-bleu                              | VSSLASEELQSFR,DGKDESSNSAPPP<br>WSHHGQALGGSYGLK,LPHDATLGSQ<br>QSLVYMK,IDELGNLVSPHMNGSR,TIS<br>PPSAVVEDTTPPIGK,APAPPPPPQPP<br>PSPVVPNR,DVSLHSALMEAIHSSGGR<br>,VPASNPTDITFLKPQR,SLTLGPSSL<br>GNISGVSMK,RAPAPPPPPQPPSPV<br>VPNR |                                                                                                                                                   |
| IPI00762331.2 | Q3UMF0   | Cobl1  | Isoform 1 of Cordon-bleu protein-like 1                       | ADETVQTS DGSISAQHSSASLQDSVN<br>ASR,MDRSVPDPLPRAPR                                                                                                                                                                           |                                                                                                                                                   |
| IPI00129529.2 | Q9Z160   | Cog1   | Conserved oligomeric Golgi complex subunit 1                  |                                                                                                                                                                                                                             | EGAFPMTQNR,TCMAQVIAAYEQLT<br>EENQIKK,LPTQPSWYVQSFLFSLC<br>QEVNR                                                                                   |
| IPI00626353.5 | Q9QZR9   | Col4a4 | Isoform 1 of Collagen alpha-4(IV) chain                       |                                                                                                                                                                                                                             | PGLPGLPGAPGPEGPPGSDVIYCR<br>PGCPGPMGEK,GKPGMSGIPGPPG<br>FR,GPPGPTLLVQPPDL SIYK,GDTG<br>EAGCPGAPGPPGPTGDPGPK,GPV<br>GPPGCR                         |
| IPI00229834.3 | Q8CIE6   | Copa   | Coatomer subunit alpha                                        | TLDLPIYVTR,DADSITLFDVQK,GITG<br>VDLFGTTDAVVK,LVGQSIAYLQK,DM<br>SGHYQNALYLGDVSER,CPLSGACYS<br>PEFK,ASNLENSTYDLYTIPK,VLTDPT<br>EFK                                                                                            | YAVTTGDHGIIR,LVGQSIAYLQK,<br>LSFLYLITGNLEK,SILLSVPLLVD<br>LLQPPAPIMPLDTNWPLLTVSK,LVG<br>QSIAYLQK,GLSFHPK,HAIVICNR,G<br>HYNNVSCAVFHPR<br>IEIALEAAK |

|               |        |        |                                                         |                                                                                                                                                                                   |
|---------------|--------|--------|---------------------------------------------------------|-----------------------------------------------------------------------------------------------------------------------------------------------------------------------------------|
| IPI00120503.1 | Q9JIF7 | Copb1  | Coatomer subunit beta                                   | AAAQCYIDLIK,NFEHLIPDAPELI<br>HDFLVNEK,TLQLALDLVSSR,NAV<br>LAIYTIYR,KEEDRPPLR,NVEELVI<br>VLK,KPITDDDVDR,VLQDLVMDIL<br>R,VLSTPDLEVR                                                 |
| IPI00115097.1 | O55029 | Copb2  | Coatomer subunit beta'                                  | VLAAQETHEGVTEDGIEDAFEVL<br>GEIQEIVK,EAFVVEEWVK,HSEV<br>QQANLK,AAESLADPTEYENLFPGLPEAAFLAR,HSEVQQANLK,AAESL<br>LK,LDACLELLIR,LNYYVGGIEVTLADPTEYENLFPGLK<br>AHLDR,FELALQLGELK        |
| IPI00223437.4 | Q8BP96 | Copg   | Putative uncharacterized protein                        | VVVVQAISALCQK,ELAPAVSVLQ<br>LFCSSPK,DSPLDFDIESCLR,TLE<br>EAVGNIVK,AIVDCIISIIIEENSEKAGAVSALAK,SAVLQEAR,ALCQITD<br>STMLQAVR,ELAPAVSVLQLFCSS<br>PK,VPSVSSSALVSSLHLLK,TLEEA<br>VGNIVK |
| IPI00316359.1 | Q9QXK3 | Copg2  | Isoform 1 of Coatomer subunit gamma-2                   | ELAPAVSVLQLFCSSPK,FGAQNE<br>SLLPSILVLLQR                                                                                                                                          |
| IPI00131873.1 | O88545 | Cops6  | COP9 signalosome complex subunit 6                      | PMQVIGALIGK,IGVDHVAR                                                                                                                                                              |
| IPI00124820.2 | Q9WUM4 | Coro1c | Coronin-1C                                              | KPTDTASVQNEAK,HVFGQAVK,A<br>IFLADGNVFTTGFSR,VGIVAWHP<br>TARKPTDTASVQNEAK,LEQQLAK,HVF<br>GQAVK,VGIVAWHPTAR,KSDLFQD<br>DLYPDTAGPEAALEAEWFEGK,H<br>GYIPGK                            |
| IPI00132575.3 | Q9CQI6 | Cot1   | Coactosin-like protein                                  | DDGSAVIWVTFR,FALITWIGEDV<br>SGLQR                                                                                                                                                 |
| IPI00131176.1 | P00405 | COX2   | Cytochrome c oxidase subunit 2                          | ILYMMDEINNPVLTVK,LLEVDNR,<br>MLISSEDLVLSWAVPSLGLK,VVL<br>PMELPIR                                                                                                                  |
| IPI00117978.1 | P19783 | Cox4i1 | Cytochrome c oxidase subunit 4 isoform 1, mitochondrial | SEDYAFPTYADR,DYPLPDVAHVT<br>MLSASQK,ANPIQGFSK,ADWSS<br>LSR,IQFNESFAEMNR                                                                                                           |
| IPI00120719.4 | P12787 | Cox5a  | Cytochrome c oxidase subunit 5A, mitochondrial          | LNDFASAVR,EIYPYVIQELRPTLN<br>ELGISTPEELGLDKV,RLNDFASA<br>VR,GMNTLVGYDLVPEPK,EIYPY<br>VIQELRPTLNELGISTPEELGLDK,I<br>IDAALRLNDFASAVR,GMNTLVGYDLVPEPK<br>,KGMNTLVGYDLVPEPK           |
| IPI00121443.1 | Q9DCW5 | Cox6a1 | Cytochrome c oxidase polypeptide VIa                    | SRHEEHERPPFVAYPHLR,HEEH<br>ERPPFVAYPHLR,ALTYFVALPGV<br>GVSMNLVFLK,TKPFPWGDGNHT<br>LFHNPVHNPVLPPTGYEDE                                                                             |
| IPI00225390.5 | P56391 | Cox6b1 | Cytochrome c oxidase subunit 6B1                        | NCWQNYLDFHR,IAEGTFPGK,G<br>GDVSVCEWYR,IAEGTFPGKI,SL<br>CPVSWVSAWDDR,FPNQNTK                                                                                                       |
| IPI00114377.1 | P48771 | Cox7a2 | Cytochrome c oxidase polypeptide 7A2, mitochondrial     | GGASDALLYR,LFQEDNGMPVHL<br>K                                                                                                                                                      |
| IPI00605187.4 |        | Cp     | ceruloplasmin isoform a                                 | DIFTGLIGPMK,MFTTAPDQVDKEDD<br>FQESNK                                                                                                                                              |



|               |        |        |                                                              |                                                                                                                                              |                                                                                                                                           |
|---------------|--------|--------|--------------------------------------------------------------|----------------------------------------------------------------------------------------------------------------------------------------------|-------------------------------------------------------------------------------------------------------------------------------------------|
| IPI00421085.1 | Q6NVF9 | Cpsf6  | Cleavage and polyadenylation specificity factor subunit 6    |                                                                                                                                              | VLISLQDCLHGIESK,AVSDASAGD<br>YGSAIETLVTAISLIK,LMDLLPK                                                                                     |
| IPI00130708.1 | O35427 | Crcp   | DNA-directed RNA polymerase III subunit RPC9                 | NQSPAIVQEFLTAMK,HSAGQQNLNAI<br>TYETLK                                                                                                        |                                                                                                                                           |
| IPI00119924.1 | Q01147 | Creb1  | Isoform 1 of Cyclic AMP-responsive element-binding protein 1 | ILNDLSSDAPGVPR,TAPTSTIAPGVVM<br>ASSPALPTQPAEEAAR                                                                                             |                                                                                                                                           |
| IPI00111286.1 | Q9CYA0 | Creld2 | Cysteine-rich with EGF-like domain protein 2                 | LLEIMEGLCDSSDFECNQLLEQQEEQ<br>LEAWWQTLK,GPLCIDCTDGFSLQR                                                                                      |                                                                                                                                           |
| IPI00121319.1 | Q9DCT8 | Crip2  | Cysteine-rich protein 2                                      | GVNIGGAGSYIYEKQTEAPQVTGPIE<br>VPVVR,GVNTGAVGSYIYDKDPEGTVQ<br>P                                                                               |                                                                                                                                           |
| IPI00307991.1 | Q64010 | Crk    | Isoform Crk-II of Proto-oncogene C-crk                       | ALFDFNGNDEEDLPFK,IGDQEFDSL<br>ALLEFYK,HGVFLVRDSSTSPGDYVLS<br>VSENSR,IHYLDTTTLIEPVAR,TALALE<br>VGELVK,ALFDFNGNDEEDLPFK,DS<br>STSPGDYVLSVSENSR |                                                                                                                                           |
| IPI00113362.2 | P47941 | Crkl   | Crk-like protein                                             | KGELLVIIKPEEQWWSAR,VGMIPVP<br>YVEK,YSPSPVGSVSAPNLPTAEENLE<br>YVR,IGDQEFHLPALLEFYK,VIIK,TA<br>LALVGDIVK,GELLVIIKPEEQWWSA<br>R,IHYLDTTTLIEPAPR |                                                                                                                                           |
| IPI00338211.4 | Q9Z2L7 | Crif3  | Isoform 1 of Cytokine receptor-like factor 3                 |                                                                                                                                              | ASHIQLDSLPEVPLLVDVPCLSAQL<br>DDSILNIVK,LVTLLQEVDTIEQETIKP<br>LDDCQK                                                                       |
| IPI00132376.3 | P63154 | Crnk1  | Crooked neck-like protein 1                                  | RTVISNWIK,EAAEQDPDKDIDSESSS<br>F,APAEVQITAEQLLR,LMLLESWR,LD<br>MPEVLWK,FAELETILGDIER,AIYELAIS<br>QPR,ANPHNYDAWFDYLR                          |                                                                                                                                           |
| IPI00113141.1 | Q9CZU6 | Cs     | Citrate synthase, mitochondrial                              |                                                                                                                                              | TVVGQITVDMMYGGMR,LPCVAA<br>AALPSHVVTMLDNFPTNLHPMSQL<br>K,ALGVLAQLIWSR,MALLTAATR,<br>ALGFPLERPK<br>SAAITALNSENFR,NSSCLVLAAR<br>,DVLSNLIPIK |
| IPI00330591.1 | Q9JKB3 | Csda   | Isoform 1 of DNA-binding protein A                           | GAEAANVTGPDGVPVEGSR,PAPAIG<br>EAEDKENQQAANGPNQPSAR,EDVVF<br>HQTAIK,DGVPEGTQLQHR,SVGDE<br>TVEFDVVEGK,NDTKEDVFVHQTAIK                          | GAEAANVTGPDGVPVEGSR,SRP<br>LNAVSQDGK,SVGDETVFEFDV<br>EGEK<br>EDVVFVHQTAIK,PAPAIGEAEDK,RP<br>QYRPPYR,SRPLNAVSQDGK,VFP<br>PNR               |
| IPI00338717.3 | Q80TP8 | Csde1  | MKIAA0885 protein (Fragment)                                 | VGDDVEFEVSSDRR,DQFGFINYEVG<br>DSK,VGDDVEFEVSSDR,ATNIEVLSNT<br>FQFTNEAR,GEVYFPGIVGMANK                                                        | QRPGQIATCVR,GDLETLQPGDDV<br>EFTIK,NITLDDASAPR,IKPEIHPEER                                                                                  |

|               |        |         |                                                         |                                                                                                                                                                                 |                                                                                                                                                                                                                                                                                                            |                                                                                                                                                                                                                                                                                                          |
|---------------|--------|---------|---------------------------------------------------------|---------------------------------------------------------------------------------------------------------------------------------------------------------------------------------|------------------------------------------------------------------------------------------------------------------------------------------------------------------------------------------------------------------------------------------------------------------------------------------------------------|----------------------------------------------------------------------------------------------------------------------------------------------------------------------------------------------------------------------------------------------------------------------------------------------------------|
| IPI00112414.1 | Q9ERK4 | Cse1l   | Exportin-2                                              |                                                                                                                                                                                 | LVLDAFALPLTNLFK,ATIELCSTH<br>ANDASALR,FVTAIWNLVTTGR,V<br>CASVTFK,NDIPSSYMLFPHLLQ<br>PVLWER,SFSLQEAIPYIPTLITQ<br>LTQK,FFEGPVTGIFSGYVNSMLQ<br>EYAK,HGITQANELVNLTEFFVNI<br>LPDLK,ILFSSLILISK,GSNNTLFT<br>AAEIAPFVEILLTNLFK,LLQTDDEE<br>EAGLLELLK,IHLAQLSHK,IIPEIQ<br>K,FLESVEGNQNYPLLLLTLEK,D<br>AAIYLVTSLASK | LVLDAFALPLTNLFK,SNNVNEFPVL<br>K,IPGLLGVFQK,LSTACPGR,MELSD<br>ANLQTLTEYLK,LLQAFLER,VCAS<br>VTFK,SFSLQEAIPYIPTLITQ,LTQK,<br>FFEGPVTGIFSGYVNSMLQEQYAK,Q<br>LSDAISIIGR,YGALALQEIFDGIQPK,<br>GSNNTLFTAEEIAPFVEILLTNLFK,I<br>HLAQLSHK,IIPEIQK,FQSGDFHVIN<br>GVLK,GSSTIATAAADK,FLESVEGN<br>QNYPLLLLTLEK,TAHSLFK |
| IPI00330729.4 | Q8BK63 | Csnk1a1 | Isoform 1 of Casein kinase I isoform alpha              | YASINAHLGIEQSR,LFLIDFGLAK                                                                                                                                                       |                                                                                                                                                                                                                                                                                                            |                                                                                                                                                                                                                                                                                                          |
| IPI00120162.1 | Q60737 | Csnk2a1 | Casein kinase II subunit alpha                          | QLYQTLTDYDIR,FVHSENQHLVSPEA<br>LDFLDK,VLGTEDLYDYIDK,GGPNIITL<br>ADIVK,YSEVFRAINITNNEK                                                                                           | DVKPHNVMIDHEHR,DVKPHNVM<br>IDHEHRK                                                                                                                                                                                                                                                                         | VLGTEDLYDYIDK,GGPNIITLADIVK                                                                                                                                                                                                                                                                              |
| IPI00118795.1 | O54833 | Csnk2a2 | Casein kinase II subunit alpha'                         | VLGTDELYGYLK,YSEVFRAINITNNER,<br>EPFFHGQDNYDQLVR,LIDWGLAEFYH<br>PAQEYNVR,QLYQILTDFDIR,YHIDLDP<br>HFNDILGQHSR,HLVSPEALDLLDKLLR<br>,HLVSPEALDLLDK                                 |                                                                                                                                                                                                                                                                                                            |                                                                                                                                                                                                                                                                                                          |
| IPI00357493.6 | B2RX88 | Cspp1   | centrosome and spindle pole associated protein 1        | GYVDGDDVPEEPNTQISAAENK,RGY<br>VDGDDVPEEPNTQISAAENK,KPTNTD<br>DEGSLVDPDDIMR,GNTFGEPLSELQI<br>K,EEVGISGAEHPSLSGSAGVPER,NP<br>MDIFDMAR,AVVSDQNLATSNAENLE<br>DSANK,GLDATTQNIHDFNELR |                                                                                                                                                                                                                                                                                                            |                                                                                                                                                                                                                                                                                                          |
| IPI00123891.3 | P97315 | Csrp1   | Cysteine and glycine-rich protein 1                     |                                                                                                                                                                                 |                                                                                                                                                                                                                                                                                                            | GFGFGQGAGALVHSE,HEEAPGHR<br>PTTNPASK                                                                                                                                                                                                                                                                     |
| IPI00125931.1 | Q62426 | Cstb    | Cystatin-B                                              |                                                                                                                                                                                 |                                                                                                                                                                                                                                                                                                            | QIVAGTNLFK,VFQPLPHENKPLTLS<br>SYQTNK                                                                                                                                                                                                                                                                     |
| IPI00116747.1 | Q99LC2 | Cstf1   | Cleavage stimulation factor 50 kDa subunit              | SISFHPSGDFILVGTQHPTLR,DGQLIA<br>TGSADASIK,LGMENDDTAVQYAIGR,S<br>AMPIEVMMNETAQQNMENHPVIR                                                                                         |                                                                                                                                                                                                                                                                                                            |                                                                                                                                                                                                                                                                                                          |
| IPI00467932.4 | Q8C7E9 | Cstf2t  | Cleavage stimulation factor 64 kDa subunit, tau variant | NMLLQNPQLAYALLQAQVVMRIMDPEI<br>ALK,AALIMQVLQLTADQIAMLPPEQR,<br>GPMTGGIQGPGPINMGAGGPQGP,RP<br>IFSEVGSVVSFR,SLGPAAPIIDSPYGD<br>PIDPEDAPESITR                                      |                                                                                                                                                                                                                                                                                                            |                                                                                                                                                                                                                                                                                                          |
| IPI00116929.1 | Q99LI7 | Cstf3   | Cleavage stimulation factor 77 kDa subunit              |                                                                                                                                                                                 | LAAIIPDPVVAPSIVPVLK,FLAFES<br>NIGDLASILK                                                                                                                                                                                                                                                                   | LAAIIPDPVVAPSIVPVLK,HLAPPGL<br>HPVPGGVFPVPPAAVLMK                                                                                                                                                                                                                                                        |

|               |          |          |                                           |                                                                                                                                                                                        |                                                                                                                                                                                                                                                                                   |                                                                                                                                                                            |
|---------------|----------|----------|-------------------------------------------|----------------------------------------------------------------------------------------------------------------------------------------------------------------------------------------|-----------------------------------------------------------------------------------------------------------------------------------------------------------------------------------------------------------------------------------------------------------------------------------|----------------------------------------------------------------------------------------------------------------------------------------------------------------------------|
| IPI00856974.1 | P56546-2 | Ctbp2    | Isoform 2 of C-terminal-binding protein 2 | GAALDVHESEPFSAQGGLK,GETLGLIGFGR                                                                                                                                                        | GAALDVHESEPFSAQGGLK,PLVALLDGR,AAGELGIAVCNIPSAAV EETADSTVCHILNLYR,TGQAVAVR,VQSVEQIR,DLATVAFCDQST QEIHEK                                                                                                                                                                            | GAALDVHESEPFSAQGGLK,PLVALLDGR,TGQAVAVR                                                                                                                                     |
| IPI00112963.1 | P26231   | Ctnna1   | Catenin alpha-1                           |                                                                                                                                                                                        | AVMDHVSDSFLETNPVLLVLEAAK,VLTDAVDDITSIDDFLAVSENHILEDV,NK,AEVQNLGGELVVGVDAMSLIQAAK,AHVLAASVEQATEN FLEK,EELVVAVEDVR,LLILADMA DVYK,LAQENMDLFKEQWEKQVR,ESQFLKEELVVAVEDVR,ALLSAVTR,TIADHCPDSACK,MSASQLEALCPQVINAALAAKPQSK,LLEPLVTQVTTLVNTNSK,VKAEVQNLG GELVVGVDAMS LIQAAK,IAEQ VASFQEEK | SKLDAEVSK,NVPILYASQACLQHP DVAAYK,IVAECNAVR,ALLSAVTR,V LTAVDVDDITSIDDFLAVSENHILEDV NK,MSASQLEALCPQVINAALALAA KPQSK,AEVQNLGGELVVGVDAMS LIQAAK,LLEPLVTQVTTLVNTNSK,NLMNAVVTQVK |
| IPI00119870.2 | Q61301   | Ctnna2   | Isoform 1 of Catenin alpha-2              |                                                                                                                                                                                        |                                                                                                                                                                                                                                                                                   | IVAECNAVR,ALLSAVTR,LLEPLVTQ VTTLVNTNSK                                                                                                                                     |
| IPI00125899.1 | Q02248   | Ctnnb1   | Catenin beta-1                            |                                                                                                                                                                                        | EGLLAIFK,LVQLLVR,GLNTIPLFV QLLYSPIENIQR,VAAGVLCELAQ DKEAAEIEAEGATAPTELLHSR, LHYGLPVVVK,VAAGVLCELAQD K,LSELVTSLLFR,LILASGGPQAL VNIMR,NLALCPANHAPLR,MLGS PVDSVLFYAITTLHNLLHQEGAK, LLNDEDQVVVVK                                                                                      | AAVMVHQLSKKEASR,LHYGLPVV V K,VAAGVLCELAQDK,NKMMVCQV G GIEALVRTVLR,FLAITDCLQILAYG NQESKLILASGGPQALVNIMR                                                                     |
| IPI00752108.1 |          | Ctnnd1   | 108 kDa protein                           | QPELPEVIAMLGFR,VSPQDANSLMAN GTLTR,TVQPVPMGPDGLPVDASAVS NNYIQTLLGR,HYEDGYPGGSDNYGSL SR,LNGPQDHNHLLYSTIPR,DMDLDEV ITGTLWNLSSHDSIK,AAALVLQTIWGY K,GIPILVGLLDHPK,ARDMDLDEVITGT LWNLSSHDSIK | ALSAIAELLTSEHER,DMDLDEVIT GTLWNLSSHDSIK,AAALVLQTIW GYK,NLPGGQQNSSFSEDTV VSILNTINEVIAENLEAAK,TPAILE ASAGAIQNLCAGR                                                                                                                                                                  | HAIPNLVK,TPAILEASAGAIQNLCAG R,NLSYQVHR                                                                                                                                     |
| IPI00111959.2 | P70698   | Ctps     | CTP synthase 1                            | YILVTGGVISGIGK,VPLLLLEEQQVVDY FLR                                                                                                                                                      | YILVTGGVISGIGK,VPLLLLEEQQV VDYFLR,ALEHSALAINHK                                                                                                                                                                                                                                    | GLGLSPDLVVCRA,LCSAHGVLVPPG FGVRA,ALEHSALAINHK,SCGLHVTSI K,GVIASSVGTILK                                                                                                     |
| IPI00624988.4 | Q3UGC2   | Ctnn     | Cortactin, isoform CRA_e                  | YGLFPANYVELR,NASTFEEVVQVPSA YQK                                                                                                                                                        |                                                                                                                                                                                                                                                                                   |                                                                                                                                                                            |
| IPI00453812.3 | Q99LJ0   | Ctnbp2nl | CTTNBP2 N-terminal-like protein           | FTNQGGPIKPVSPNSSPFGTDYR,LSKP ELLTLFSILEGELEAR                                                                                                                                          |                                                                                                                                                                                                                                                                                   |                                                                                                                                                                            |
| IPI00124047.1 | Q9WTX6   | Cul1     | Cullin-1                                  |                                                                                                                                                                                        | QVTNAVLR,LLIQAIVR                                                                                                                                                                                                                                                                 |                                                                                                                                                                            |
| IPI00467383.2 | Q9JLV5   | Cul3     | Cullin-3                                  | MQHNVLVAEVTQQLKAR,GLTEQEVE TILDK                                                                                                                                                       |                                                                                                                                                                                                                                                                                   |                                                                                                                                                                            |

|               |        |             |                                                                                    |                                                                                                                                                                                                                       |                                                                                                                              |                                                                                   |
|---------------|--------|-------------|------------------------------------------------------------------------------------|-----------------------------------------------------------------------------------------------------------------------------------------------------------------------------------------------------------------------|------------------------------------------------------------------------------------------------------------------------------|-----------------------------------------------------------------------------------|
| IPI00224689.3 | A2A432 | Cul4b       | cullin 4B                                                                          |                                                                                                                                                                                                                       | GGVQVLLQQWIEYIK,ETVEEQAS<br>TTER,TIDGILLIER,RPNKPAELIA<br>K,LKEAVEAIQNSTSIK                                                  | HECGAFTSK,RPNKPAELIAK,AQI<br>HQFR,YNLEELYQAVENLCSHK,QG<br>PPRPPYPPLLPPVFPPTPPPQVR |
| IPI00230113.5 | P56395 | Cyb5        | Cytochrome b5                                                                      |                                                                                                                                                                                                                       | TYIIGELHPDDR,FLEEHPGGEEVL<br>R                                                                                               |                                                                                   |
| IPI00110885.2 | B0QZG1 | Cyb5r3      | Putative uncharacterized protein                                                   |                                                                                                                                                                                                                       | DILLRPELEELR,IGDTIEFR                                                                                                        | FALPSPQHILGLPIGQHIYLSTR,STP<br>AITLENPDIK                                         |
| IPI00116850.3 | Q99LF4 | D10Wsu52e   | UPF0027 protein C2orf28 homolog                                                    | EQLAQAMFDHIPVGVGSK,GLGHQVA<br>TDALVAMEK,VFNTTPDDLHLHVIYDV<br>SHNIAK,NYNDELQFLDK,GLPQLGTLG<br>AGNHYAEIQVVDEIFNEYAAK,NLDFQ<br>DVLDK,DLEEALEMGVDWSLR,GGGV<br>GGFLPAMK,QIGNVAALPGIVHR,GMA<br>AAGNYAWVNR                   |                                                                                                                              | GLPQLGTLGAGNHYAEIQVVDEIFN<br>EYAAK,LRPIAVIK,QIGNVAALPGIVH<br>R                    |
| IPI00222675.3 | Q8BKS9 | D19Bwg1357e | D19Bwg1357e protein                                                                | NMLTEELYGNTFQLYK,QIIIEISSLPS<br>IVNDK,TYVEK,QAFQELQGDLVELSK,<br>VFLDFFTYAPPK,HSEASAIVEYAYNDK<br>,DPAHTVPELIELLQK                                                                                                      | EAVVYLAHTHDGAR,VFLDFFTYA<br>PPKPR,SELIEAIR                                                                                   |                                                                                   |
| IPI00109313.1 | Q9CWN7 | D1Bwg0212e  | Uncharacterized protein C2orf29 homolog                                            |                                                                                                                                                                                                                       | LGSVLVMLLQQPDLLPSAAQR,LP<br>DLVENNPLVAIEMLLK                                                                                 |                                                                                   |
| IPI00468516.3 | Q6PGL7 | D6Wsu116e   | Isoform 1 of Protein FAM21                                                         | STGVFQDEELLFSHK,THDIFEDDIFAT<br>EAIKPFPK,DNDPDVDLDFAGTK,VSPEV<br>GSADVASIAQK,SLAFDLDSEGSSTED<br>LFQSVKPR,VASIFDDPLNAFGSQ,LAA<br>QESSEAEVDTVDR,SMFDDDTDDIFSS<br>GLQAK,SSVPSGGSLFGDDEDDDLFS<br>SAK,SRPQTGNEADLFDSGDIFPK |                                                                                                                              |                                                                                   |
| IPI00308852.4 | P98078 | Dab2        | Isoform p96 of Disabled homolog 2                                                  | VGIPQEHVDHDDFDANQLLNK,DLFQV<br>IYNVK,DIPSDAFTGLDPLGDK,LIGIDD<br>VPDAR,DILLVDLNSEIDTNQNSLR,KG<br>ETPPSGTSSAFSSYFNK,TGKPEAQQ<br>GPWPYPSSQTQQAVR                                                                         |                                                                                                                              |                                                                                   |
| IPI00109082.3 | P61804 | Dad1        | Dolichyl-diphosphooligosaccharide--<br>protein glycosyltransferase subunit<br>DAD1 |                                                                                                                                                                                                                       | ADFQGISPER,IQINPQNK,FLEEY<br>LSSTPQR                                                                                         |                                                                                   |
| IPI00222457.2 | Q3U987 | Dars        | aspartyl-tRNA synthetase isoform 1                                                 | YDTDFYVLDK,LPLQLDDAIRPEVEGEE<br>DGR,YGISSMIQSQEKPDR                                                                                                                                                                   | ESIIDVEGVVR,LPLQLDDAIRPEV<br>EGEEDGR,IGSCTQQDVELHVQK,<br>ATVNQDTR,IYVISLAEPR,VTMLF<br>LGLHNVR,ALHHGIDLEK,FGAPP<br>HAGGGIGLER | VFCIGPVFR,MPSTNASR,IGSCTQQ<br>DVELHVQK,LQSGICHLFR,ALHHGI<br>DLEK                  |
| IPI00831695.1 | Q3UGB5 | Dazap1      | DAZ associated protein 1 isoform c                                                 | FGVVTEVVMYDAEK,GFGVVKFK                                                                                                                                                                                               |                                                                                                                              |                                                                                   |
| IPI00222430.5 | Q4VWZ5 | Dbi         | diazepam binding inhibitor isoform 1                                               | TYVEK,TQPTDEEMLIYSHFK,VDELK                                                                                                                                                                                           |                                                                                                                              | QATVGDVNTDR,QATVGDVNTDRP<br>GLLDLK                                                |

|               |        |        |                                                     |                                                                                                                                                                                  |                                                                                                                                                         |
|---------------|--------|--------|-----------------------------------------------------|----------------------------------------------------------------------------------------------------------------------------------------------------------------------------------|---------------------------------------------------------------------------------------------------------------------------------------------------------|
| IPI00378015.1 | Q62418 | Dbnl   | Isoform 1 of Drebrin-like protein                   | FVLINWTGEGVNDVRK,FVLINWTGEGVNDVR,SPTDWALFTYEGNSNDIR,ES TSFQDVGPQAPVGSVYQK,VAGTGEGGLEELVEELNSGK                                                                                   |                                                                                                                                                         |
| IPI00890234.1 | Q3TMF5 | Dbt    | dihydrolipoamide branched chain transacylase E2     |                                                                                                                                                                                  | PVILPPEVAIGALGAIK,AASLGLLQF PILNASVDENCQNITYK                                                                                                           |
| IPI00129701.6 | Q6PAC3 | Dcaf13 | WD repeat and SOF domain-containing protein 1       | NYDPTLHPFEVPR,MDGGPGYEEEEEP LYTVLGK                                                                                                                                              |                                                                                                                                                         |
| IPI00886236.1 | Q8BHC4 | Dcakd  | Dephospho-CoA kinase domain-containing protein      |                                                                                                                                                                                  | YVILDIPLLFETK,HVVQPGYPAHR,VLGDLIFNQPDR,MFLVGLTGGAISGK,HTVVVYCDR,IVEAFGTEVLL ENGDIDR,IVEAFGTEVLLLENGDIDRK,VLGDLIFNQPDRR                                  |
| IPI00331692.1 | Q8QZV3 | Dci    | dodecenoyl-Coenzyme A delta isomerase precursor     |                                                                                                                                                                                  | ALQLGTLFSPAELK,EAVDGARR                                                                                                                                 |
| IPI00459280.2 | Q9DAR7 | Dcps   | Scavenger mRNA-decapping enzyme DcpS                | TDDPLLQLLQK,IVFENPDPSDGFVLIPDLK,VNEDSGDTHGEDAVVILEK,TPFQVEHVAQLLTGSPELK                                                                                                          |                                                                                                                                                         |
| IPI00856500.2 |        | Dctn1  | Putative uncharacterized protein                    |                                                                                                                                                                                  | EQVAQLK,RMPGTDAPGIPAALAFG SQVSDTLDCRK,LQEELSQAESTID ELK,GPPPSGIATLVSGIAGGGGAPG QAPGALPGPGLVK                                                            |
| IPI00116112.3 | Q99KJ8 | Dctn2  | Dynactin subunit 2                                  | ASVEDADTQNKVHQLYETIQR,RTGYE SVDYEMLGEGLVK,VSALDLAVLDQVEAR,DNTALLTQVQTTMR,LLHEVQELTTEVEK,LLGPDAAINLADPDGALAK,L LHEVQELTTEVEKIK,WSPVASTLPELVQR,ENLATVEGNFASIDAR,TGYESGD YEMLGEGLVK | LLGPDAAINLADPDGALAK,WSPVASTLPELVQR                                                                                                                      |
| IPI00109482.3 | Q9CWS0 | Ddah1  | N(G),N(G)-dimethylarginine dimethylaminohydrolase 1 | LQLNIVEMKDENATLDGGDVLFTGR,D YAVSTVPVADSLHLK,GAEILADTFKDY AVSTVPVADSLHLK,DENATLDGGDVL FTGR                                                                                        |                                                                                                                                                         |
| IPI00316740.4 | Q3U1J4 | Ddb1   | DNA damage-binding protein 1                        |                                                                                                                                                                                  | ETDDTLVLSFVGQTR,LVFSNVNLK,LEELHVIDVK,SVLLAYKPMENFEEIAR,LVSQEPK,EATADDLIK VVEELTR,LFMLLEK,DLLFILTAK, LVFSNVNLK,LPSFELLHK,VVEELTR,VTLTGTQPTVLR,YLAIAPPIIK |
| IPI00410819.3 | Q8C4P7 | Ddost  | Putative uncharacterized protein                    |                                                                                                                                                                                  | LPDVYGVFQFK,TAVIDHHNYDVS DLGQHTLIVADTENLLK,NTLLIAG LQAR,TLVLLDNLNVR                                                                                     |
| IPI00230034.5 | O35215 | Ddt    | D-dopachrome decarboxylase                          | IPAGLENR,LCAATATILDKPEDR,FLTEELSLDQDR,STEPCAHLLVS SIGVVGTAEQNR                                                                                                                   | IPAGLENR,LCAATATILDKPEDR,TH SASFFK,FFPLEAWQIGK                                                                                                          |

|               |        |        |                                           |                                                                                                                                                                                                                                                                                                       |                                                                                                                                                                                                                                                                                                                                                                                                                                    |                                                                                                                                                                                                                                  |
|---------------|--------|--------|-------------------------------------------|-------------------------------------------------------------------------------------------------------------------------------------------------------------------------------------------------------------------------------------------------------------------------------------------------------|------------------------------------------------------------------------------------------------------------------------------------------------------------------------------------------------------------------------------------------------------------------------------------------------------------------------------------------------------------------------------------------------------------------------------------|----------------------------------------------------------------------------------------------------------------------------------------------------------------------------------------------------------------------------------|
| IPI00127172.3 | Q91VR5 | Ddx1   | ATP-dependent RNA helicase DDX1           | GHVDVLAPTQELAALEK,DNTRPGAN<br>SPEMWSEAIK                                                                                                                                                                                                                                                              | GIDIHGVPYVINVTLPDEK,LQVIV<br>CSATLHSFDVK,APDNYIVK,FLVL<br>DEADGLLSQGYSDFINR,MGLAIS<br>LVATEK,ELAEQTLNNVK,ELLIIGG<br>VAAR,EAQTSFLHLGYLPNQLFR,<br>GEDSVPDVTVHHVVVPVNP,K,DLG<br>LAFEIPAHIK,GHVDVLAPTQELA<br>ALEK,FLICTDVAAR,ALIVEPSR,T<br>GAFSIPVIQIVYETLK                                                                                                                                                                            | FLPNAPK,TGASVLNK,TGAFSIPVIO<br>IVYETLK,DQLSVLDNGVDIVGTGP                                                                                                                                                                         |
| IPI00896604.1 | Q80Y44 | Ddx10  | Probable ATP-dependent RNA helicase DDX10 | MEVYNEFVR,APSLPNDEADESPAYV<br>SEK,DDDDDEDGPDADFLTVK,ELAYQT<br>FEVLR,AAVLFATDIAAR                                                                                                                                                                                                                      |                                                                                                                                                                                                                                                                                                                                                                                                                                    |                                                                                                                                                                                                                                  |
| IPI00653307.1 | Q3U741 | Ddx17  | DEAD box polypeptide 17 isoform 1         | GLDVEDVK,MLDMGFEPQIR,APILIAT<br>DVASR,ELAQQVQQVADDYGK                                                                                                                                                                                                                                                 | TIIFVETK,TLAYLLPAIVHINHQPYL<br>ER,STCIYGGAPK,GLDVEDVK,GV<br>EICIATPGR,EANQAINPK,GDGP<br>CLVLAPTR,APILIATDVASR,ELAQ<br>QVQQVADDYGK,VLEEANQAINP<br>K                                                                                                                                                                                                                                                                                 | IVDQIRPDR,STCIYGGAPK,LMQLV<br>DHRGGGGGGGGKGGGR,EANQAINPK<br>,GDGPICLVLAPTR,ELAQQVQQVAD<br>DYGK,APILIATDVASR                                                                                                                      |
| IPI00459381.2 | Q8K363 | Ddx18  | ATP-dependent RNA helicase DDX18          | LQETSDTLSQPQNGDVPK,LLNGINII<br>VATPGR,YHYELLNYIDLPLVAIHGK,AD<br>DSEVPSLPLGLTGAFEDTSFASLSNLV<br>NENTLK,KADDSEVPSLPLGLTGAFED<br>TSFASLSNLVNENTLK,ILDVGFEEELK,<br>FLLLFTFLK,ILDVGFEEELKQIIK,LTTLA<br>NGEAAPTPPPDSEVK,VPLNQDFSW<br>SK,LLDHMQNTPGFMYK,SVPVDSAEA<br>QSGGMPEETLENGK                          | LLNGINIIVATPGR,GHALLLRPEE<br>LGFLR,YHYELLNYIDLPLVAIHGK,<br>VSDIQSQLEK,RFLLFTFLK,RGG<br>GGGFGYQK,KADDSEVPSLPLGL<br>TGAFEDTSFASLSNLVNENTLK,IL<br>LNQDFSWK                                                                                                                                                                                                                                                                            | QIFNVNNLNLPQVALSFGFK,KADD<br>SEVPSLPLGLTGAFEDTSFASLSNL<br>VNENTLK,NYFLHK,VPLNQDFSW<br>SK,KVEDLAR,ELMTHHVHTYGLIMG<br>GSNR                                                                                                         |
| IPI00227749.1 | Q8BZY3 | Ddx19b | Putative uncharacterized protein          | VFVLDEADVMIATQGHQDQSIR,LDTD<br>DLDEIEK                                                                                                                                                                                                                                                                |                                                                                                                                                                                                                                                                                                                                                                                                                                    |                                                                                                                                                                                                                                  |
| IPI00652987.3 | Q3TVJ3 | Ddx21  | DEAD (Asp-Glu-Ala-Asp) box polypeptide 21 | NGLSQPSEEEADIPKPK,SGIDILVGT<br>GR,APQVLVLAPTR,GAVEALAAALAH<br>SGATSVQDR,IGVPSATEIIK,LGSDGA<br>EESMETLPKPKSEK,WQLTVATEQPELE<br>GPPDGYR,EIITEEPSEEEADMPKPK,N<br>GLSQPSEEEVDIPKPK,GVNFLFPIQAK<br>,LLDSVPPTAISHFK,NGNFGVLVATNV<br>AAR,TFSFAIPLIEK,SLINSQAGFVTMIL<br>R,LGSDGAEESMETLPK,EGAFSNFPIS<br>EETVK | STYEQVDLIGK,LGVCFDVR,KGP<br>SEDDVDPPK,TIIFCETK,DVESYIH<br>R,LKDGLSQPSEPK,GVNFLFPIQA<br>K,LLDSVPPTAISHFK,DSEDNPQT<br>LLFSATCPHWVFNVAK,TEAVTEI<br>QEK,EGAFSNFPISEETVK,LQGG<br>LQER,STYEQVDLIGK,SGIDILV<br>GTPGR,APQVLVLAPTR,EQLGES<br>IDAK,AAVIGDVIR,EEYQLAQVEQ<br>K,IGVPSATEIIK,KDAQELSQNTCI<br>K,TGVCICFYQNK,AAITVEHLAIK,<br>NGNFGVLVATNVAAR,GLDIPEVD<br>LVVQSCPPK,TFSFAIPLIEK,LSVA<br>CFYGGTPYGGQIER,SLINSQAGF<br>VTMILR,ELANQVSK | SGIDILVGTGPR,STYEQVDLIGK,AP<br>QVLVLAPTR,GAVEALAAALAHISGA<br>TSVDQR,AAVIGDVIR,KGPSEDDVD<br>PPK,IGVPSATEIIK,GVNFLFPIQAK,<br>GLDIPEVDLVVQSCPPK,TFSFAIPLI<br>EK,QDAQSLHGDIPQK,TEAVTEIQE<br>K,ELANQVSK,EGAFSNFPISEETVK,<br>LQGGQLQER |

|               |        |       |                                                        |                                                                                                                                                                          |                                                                                                                                                                                                                                                                      |                                                                                                                                                                                                                                                                                                                                              |
|---------------|--------|-------|--------------------------------------------------------|--------------------------------------------------------------------------------------------------------------------------------------------------------------------------|----------------------------------------------------------------------------------------------------------------------------------------------------------------------------------------------------------------------------------------------------------------------|----------------------------------------------------------------------------------------------------------------------------------------------------------------------------------------------------------------------------------------------------------------------------------------------------------------------------------------------|
| IPI00123878.4 | Q8VDW0 | Ddx39 | Isoform 1 of ATP-dependent RNA helicase DDX39          | LTLHGLQQYYVK,ILVATNLFGR,GLAVTFVSDENDAK,LFDLLDVLEFNQVVIFVK,DFLLLKPELLR                                                                                                    | CMALAQLLVEQNFPAAIHR,LTLHGLQYYVK,ILVATNLFGR,GLAVTFVSDENDAK,DFLLLKPELLR,FEVNV AELPEEIDISTYIEQSR,ILNDVQD R,VSVFFGGLSIK,GSYVSIHSSGF R,NCPHVVVGTTPGR                                                                                                                      | CMALAQLLVEQNFPAAIHR,LTLHG LQYYVK,ILVATNLFGR,DFLLLKPEL LR,ELAFQISK,ILNDVQDR,GSYVSIH SSGFR,KNCPHVVVGTTPGR,EIRPV CR,NCPHVVVGTTPGR,AIVDCGFEH PSEVQHECIPQAILGMDVLCQAK                                                                                                                                                                             |
| IPI00230035.7 | Q62167 | Ddx3x | ATP-dependent RNA helicase DDX3X                       | DLLDLLVEAK,LEQELFSGGNTGINFEK,QYPISLVLAPTR,HVINFDLPSDIEEYVHR,VGNLGLATSFNER,MLDMGFEPQIR,DFLDEYIFLAVGR,SFLDLLNATGK,ELAVQIYEER                                               | VVVVEIDKR,DREEALHQFR,DSLTLVFVETK,HAIIIK,YLVLDEADR,FLAVGR,TAAFLLPILSQIYADGPG EALR,IGLDFCK,VRPCVVYGGAEI GQQIR,LEQELFSGGNTGINFEK,V IR,DFLDEYIFLAVGR,GRG EAK,LEQELFSGGNTGINFEK,QSSG DYDGIGGR,VGNLGLATSFNER, GCHLLVATPGR,SFLDLLNATGK,S YTRPTPVQK,SPILVATAVAAR,EL AVQIYEER | WWWVEIDKR,DREEALHQFR,DS EIQMLAR,QYPISLVLAPTR,DREEAL ,HVINFDLPSDIEEYVHR,DFLDEYI HQFR,HAIIIK,HVINFDLPSDIEEYV HR,FSGGFGAR,TAAFLLPILSQIYAD GPGEALR,VRPCVVYGGAEIGQQIR, IGLDFCK,VGSTSENITQK,DLLDLLV GSTSENITQK,DLLDLLVEAK,GRG EAK,LEQELFSGGNTGINFEK,QSSG ASSSSFSSSR,VGNLGLATSFNER, GCHLLVATPGR,SFLDLLNATGK,S GCHLLVATPGR,SFLDLLNATGK,S PILVATAVAAR |
| IPI00329839.7 | Q810A7 | Ddx42 | Isoform 1 of ATP-dependent RNA helicase DDX42          | KIIDPLPIDHSEIDYPPFEK,GIRDDIEE EDDQEAYFR,GFGGFSAISAGK,VSYLVFDEADR,DIPVLVATDVAAR                                                                                           |                                                                                                                                                                                                                                                                      | VVQGDIGEANEDVTQIVEILHSGPS K,PGSSFAHGFDEQLMHQIRK,IIDP LPPIDHSEIDYPPFEK,RLVEFTSSG SVLLFVTK                                                                                                                                                                                                                                                     |
| IPI00468896.7 | Q569Z5 | Ddx46 | Isoform 1 of Probable ATP-dependent RNA helicase DDX46 | GYAYTFITEDQAR,DMAAPGTSSVPAP TAGNAEK,DAGNFDQNKLEEMR,TIA FLLPMFR,ALELSGTAVPPDLEK,YEEE LEINDFPQTAR,ISEYSEAITIR,SLEEG EGPIAVIMTPTR,VTYVVLDEADR,RYE EELEINDFPQTAR,NFYVEVPELAK | LLVATSVAAR,VTYVVLDEADR                                                                                                                                                                                                                                               |                                                                                                                                                                                                                                                                                                                                              |
| IPI00187240.1 | Q9CWX9 | Ddx47 | Probable ATP-dependent RNA helicase DDX47              |                                                                                                                                                                          |                                                                                                                                                                                                                                                                      | LFALVLTPTTR,TGAFALPILNALLETPQR                                                                                                                                                                                                                                                                                                               |
| IPI00648763.1 | B1ARB9 | Ddx5  | DEAD (Asp-Glu-Ala-Asp) box polypeptide 5               | NFYQEHPDLAR,PVLNIFYEANFPANVMDVIAR,QNFTEPTAIQAQGWVALSGLDMVGVAQTGSGK                                                                                                       | RTAQEVDTYR,TLSYLLPAIVHINHQPFLER,NFYQEHPDLAR,GDGPICLVLAPTR,PVLNIFYEANFPANVMDVIAR                                                                                                                                                                                      | TLSYLLPAIVHINHQPFLER,NFYQEHPDLAR,WNLDELPAK,TAQEVDTYR,GDGPICLVLAPTR,QNFTEPTAIQAQGWVALSGLDMVGVAQTGSGK                                                                                                                                                                                                                                          |
| IPI00420363.2 | Q61656 | Ddx5  | Probable ATP-dependent RNA helicase DDX5               | NFYQEHPDLAR,GLDVEDVK,MLDMGFEPQIR,FVINYDYPNSSEDIYHR,APILIATDVASR,PVLNIFYEANFPANVMDVIAR,TIVFVETK                                                                           | RTAQEVDTYR,STCIYGGAPK,GLDVEDVK,YLVLDEADR,DYIHINIGALELSANHNILQIVDVCHDVEKDEK,GVEICITPGR,EANQAINPK,LLQLVEDR,KIVDQIRPDR,LIDFLECGK,GDGPICLVLAPTR,APILIATDVASR,PVLNIFYEANFPANVMDVIAR,TIVFVETK,ELAQQVQQVAAEYCR,R,NFYQEHPDLAR,TTYLVLEADR,FVINYDYPNSSEDIYHR                   | STCIYGGAPK,WNLDELPAK,EANQAINPK,LLQLVEDR,LIDFLECGK,GDGPICLVLAPTR,APILIATDVASR,IVDQIRPDR,ELAQQVQQVAAEYCR,QVSDLISVLR,NFYQEHPDLAR,TAQEVDTYR,FVINYDYPNSSEDIYHR                                                                                                                                                                                    |

|               |        |        |                                                                          |                                                                                                                                                                                                                                                                                                       |
|---------------|--------|--------|--------------------------------------------------------------------------|-------------------------------------------------------------------------------------------------------------------------------------------------------------------------------------------------------------------------------------------------------------------------------------------------------|
| IPI00117771.1 | Q99MJ9 | Ddx50  | ATP-dependent RNA helicase DDX50                                         | LQAEWHDSWILSVPAK,LPEIEEYYD<br>GNTSSNPR                                                                                                                                                                                                                                                                |
| IPI00336965.1 | Q8K301 | Ddx52  | Probable ATP-dependent RNA helicase DDX52                                | IHVQGTDLDPDIATFQQLDQEYK,NSA<br>VETVEQELLFVGSETGK,GIDFKGVNL<br>VINYDFPTSSVEYIHR                                                                                                                                                                                                                        |
| IPI00109932.1 | P54823 | Ddx6   | Probable ATP-dependent RNA helicase DDX6                                 | GVTQYYAYVTER,FGHLGLAINLIT LQINQSIIFCNSSQR,PSPIQEEESIPIA<br>YDDR,LDDTVHVVIATPGR,ELALQ LSGR,SGAYLIPLLER,SIEEQLGTEIK<br>VSQICIQVSK PIPSNIDK                                                                                                                                                              |
| IPI00227720.3 | Q7TNV0 | Dek    | Protein DEK                                                              | LLYNRPGTVSSLK,SICEVLDLER                                                                                                                                                                                                                                                                              |
| IPI00230263.4 | Q3UFM6 | Dgcr14 | DiGeorge syndrome critical region protein 14 isoform 1                   | VLDEEEYIEGLQTVIQR,EYLEAEENGD<br>LER,QKDNLELPSAEHQAISSQAGVE<br>TWK,DNLELPSAEHQAISSQAGVET<br>WK,TPLTQDPASITDNLLQLPAR                                                                                                                                                                                    |
| IPI00230042.5 | P00375 | Dhfr   | Dihydrofolate reductase                                                  | LIEQPELASK,LLPEYPGVLSEVQE<br>EK                                                                                                                                                                                                                                                                       |
| IPI00756386.1 | A2ATU0 | Dhtkd1 | Probable 2-oxoglutarate dehydrogenase E1 component DHKTD1, mitochondrial | AAQINPLFPGQALLDTVPEIQALV<br>R,LNLLTGLLQLPELMFR                                                                                                                                                                                                                                                        |
| IPI00128818.2 | O35286 | Dhx15  | Putative pre-mRNA-splicing factor ATP-dependent RNA helicase DHX15       | FQIYFDNCPLLIPGR,IRVESLLVT<br>ASK,IMDRFNLPR,VIVMSATLDA<br>VESLLVTAISK,TEMQDNTYPEILR,EVD GK,TCTDIKPEWLVK,FTDILVR,EA<br>DLGPEVGDIAK,TLATDILMGVLK,LQLPV MNDPLLER,FAHIDGDHLLLNKY<br>WEYK,SNLGSVVLQK,THPVEIFYTPE HAFK,ALVTGYFMQVAHLER,YGV<br>PER IILDEAHER,DNQVQLHPSTVLD<br>HKPEWVLYNEFVLTTK,SNLGSVV<br>LQK |
| IPI00410936.1 | Q6PGC1 | Dhx29  | ATP-dependent RNA helicase Dhx29                                         | ILQIITELIK,VVVVAGETGSGK,FLE KCNIVCTQPR,KIVLATNIAETGITIPD<br>EEEEITINVTSK VVFVIDTGR,VVVVAGETGSGK                                                                                                                                                                                                       |
| IPI00351266.2 | Q8VHK9 | Dhx36  | Probable ATP-dependent RNA helicase DHX36                                | DCAVLSAILDLIK,ISAVISVAER                                                                                                                                                                                                                                                                              |



|               |        |        |                                                                                                          |                                                                                                                                                                                                                                                            |                                                                                                                                                                                                                                                                                                                                                                                                                                                                                                                                                                                                                                                                                                                                                                                                                                                                                                                               |
|---------------|--------|--------|----------------------------------------------------------------------------------------------------------|------------------------------------------------------------------------------------------------------------------------------------------------------------------------------------------------------------------------------------------------------------|-------------------------------------------------------------------------------------------------------------------------------------------------------------------------------------------------------------------------------------------------------------------------------------------------------------------------------------------------------------------------------------------------------------------------------------------------------------------------------------------------------------------------------------------------------------------------------------------------------------------------------------------------------------------------------------------------------------------------------------------------------------------------------------------------------------------------------------------------------------------------------------------------------------------------------|
| IPI00339468.4 | Dhx9   |        | Isoform 2 of ATP-dependent RNA helicase A                                                                |                                                                                                                                                                                                                                                            | <p>           HLENNSHFGSHR,AAMEALVVEV<br/>           SK,DVVLAYPEVR,VQSDGQIVFID<br/>           DWIR,AAECNIVVTQPR,LAHFEPS<br/>           QR,GISHVIVDEIHER,GMTLVTPL MMIMGCIFYVGDVAVCTISAATCFPE<br/>           QLLLFASK,ETPFELIEALLK,LQIS PFISEGKR,HLENNSHFGSHR,ISAV<br/>           HEAAACITALR,DFVNYLVR,TPLH AVAER,ELDALDANDELTPGR,AAE<br/>           EIALSIK,YTQVGPDHNH,YSPFF CNIVVTQPR,LAHFEPSQR,TTQVPQ<br/>           VFGKE,ISAVAVAER,ELDALDAND YILDDFIQNDR,GMTLVTPQLLLFA<br/>           ELTPLGR,FSDHVALLSVFQAWD SK,YQILPLHSQIPR,LGYIHR,AAQS<br/>           DAR,DINTDFLLVLR,AIEPPPLDA CALSLVR,LGGIGQFLAK,TPLHEIAL<br/>           VIEAEHTLR,TTQVPQYILDDFIQN SIK,IVLMSATIDTTMFCEYFFNCPIIE<br/>           DR,RISAVAVAER,YQILPLHSQIP VYGR,QPNIISQLDPVNEHMLNTIR,K<br/>           R,YIETLNVPGAVLVFLPGWNLIYT LEAGIR<br/>           MQK,AAQSCALSLVR,LGGIGQF<br/>           LAK,VILSTNIAETSITINDVVYVIDS<br/>           CK         </p> |
| IPI00831596.1 | Diap1  |        | Diap1 protein                                                                                            |                                                                                                                                                                                                                                                            | <p>           VSLNNNPVSWVQTFGAEGLASLL<br/>           DILK,VSLNNNPVSWVQTFGAEGL<br/>           ASLLDILKR         </p>                                                                                                                                                                                                                                                                                                                                                                                                                                                                                                                                                                                                                                                                                                                                                                                                           |
| IPI00227881.4 | Q8R418 | Dicer1 | Endoribonuclease Dicer                                                                                   |                                                                                                                                                                                                                                                            | <p>           LEMLGDSFLK,LEFLGDAILYLIT<br/>           K,RLPAESPAK,TFIAVLLTK,FSAN<br/>           VPR,LHQYIFSHILR,LNLLTPR         </p>                                                                                                                                                                                                                                                                                                                                                                                                                                                                                                                                                                                                                                                                                                                                                                                          |
| IPI00453851.4 | Q8C9B9 | Dido1  | Isoform 1 of Death-inducer obliterator 1                                                                 | <p>           VSATERPADFTTDASSASLVEQQK,EE<br/>           DSAETGSVQIGSAEQDR,AFHTLLAEP<br/>           GRPHDVQSVSETAER,LDMIKPALTA<br/>           VVPK,ALEEEEEEDDRPYDPEEYNP<br/>           R,DLYLIPLSAK,TELSQEQQAPDPSQ<br/>           GAPNTNHNLSR         </p> |                                                                                                                                                                                                                                                                                                                                                                                                                                                                                                                                                                                                                                                                                                                                                                                                                                                                                                                               |
| IPI00132415.1 | Q9D0D4 | Dimt1  | Probable dimethyladenosine transferase                                                                   |                                                                                                                                                                                                                                                            | <p>           KVVACELDPR,PTDVVLEVPGTGN<br/>           MTVKLLEK,LSINTQLLAR         </p>                                                                                                                                                                                                                                                                                                                                                                                                                                                                                                                                                                                                                                                                                                                                                                                                                                        |
| IPI00407764.6 | Q9CSH3 | Dis3   | Exosome complex exonuclease RRP44                                                                        | <p>           IDSAAMNDDITSLR,LAYDDEIPSLR         </p>                                                                                                                                                                                                      |                                                                                                                                                                                                                                                                                                                                                                                                                                                                                                                                                                                                                                                                                                                                                                                                                                                                                                                               |
| IPI00113635.7 | Q9ESX5 | Dkc1   | H/ACA ribonucleoprotein complex subunit 4                                                                |                                                                                                                                                                                                                                                            | <p>           HGKPTDNTPATWK,VAQLDTSQWP<br/>           LLLK,MIEYDPER,GEAICMAIALMTT<br/>           AVISTCDHGIVAK,NTLVTEAVQAPQ<br/>           LAAEAVNVIK,ALETLTGALFQRPPLI<br/>           AAVK         </p>                                                                                                                                                                                                                                                                                                                                                                                                                                                                                                                                                                                                                                                                                                                       |
| IPI00153660.4 | Q8BMF4 | Dlat   | Dihydrolipoyllysine-residue acetyltransferase component of pyruvate dehydrogenase complex, mitochondrial |                                                                                                                                                                                                                                                            | <p>           DVPLGAPLCIIVEK,VAPAPAGVFT<br/>           DIPISNIR,VPLPSLSPTMQAGTIAR VAPAPAGVFTDIPISNIR,GLETIASD<br/>           ,DVPVGSIIICITVEKPQDIEAFK,GL VVSLASK<br/>           ETIASDVVSLASK         </p>                                                                                                                                                                                                                                                                                                                                                                                                                                                                                                                                                                                                                                                                                                                    |
| IPI00331564.2 | Q3TIE8 | Dld    | Dihydrolipoyl dehydrogenase                                                                              |                                                                                                                                                                                                                                                            | <p>           LGADVTAVEFLGHVGGIGIDMEIS IPNIYAIGDVVAGPMLAHK,ALTGGIA<br/>           K,IDVSVEAASGGK HLFK         </p>                                                                                                                                                                                                                                                                                                                                                                                                                                                                                                                                                                                                                                                                                                                                                                                                            |
| IPI00310862.6 | Q8K4R9 | Dlgap5 | Isoform 1 of Disks large-associated protein 5                                                            | <p>           ETSEMGPLGVFR,ANEILVQQGLESLT<br/>           DR,CHVEDTPCPGEQDSSDIEHDVKN         </p>                                                                                                                                                           |                                                                                                                                                                                                                                                                                                                                                                                                                                                                                                                                                                                                                                                                                                                                                                                                                                                                                                                               |

|               |        |         |                                                           |                                                                                                                                                                                    |                                                                                                                                                                                |
|---------------|--------|---------|-----------------------------------------------------------|------------------------------------------------------------------------------------------------------------------------------------------------------------------------------------|--------------------------------------------------------------------------------------------------------------------------------------------------------------------------------|
| IPI00317722.3 | Q9JI44 | Dmap1   | Isoform 1 of DNA methyltransferase 1-associated protein 1 | AGVLGAPAAAAGVPTPASAAPTVESES<br>GLGLDPTK,TPEQVAEEEEYLLQELR                                                                                                                          |                                                                                                                                                                                |
| IPI00828253.1 | A2A9Z0 | Dmd     | dystrophin, muscular dystrophy                            |                                                                                                                                                                                    | EQIMVK,CLDEIEKK,QIESNFAQF<br>R,TLQKWMAEVDVFLK,VNAIARE<br>K<br>EQIMVK,SSAQISQAVTTTQPSLTQT<br>TVMETVTMVTR,GLSPLPSPPEMM<br>PTSPQSPR,EEDFNK,KETLVEDK,R<br>QAEGLSENGAAMAVEPTQIQLSKR |
| IPI00674554.2 |        | Dmx1    | Dmx-like 1                                                | CCPVTGSMPKPYLAWQCHNK,NNDPL<br>DAAIFYLAMK                                                                                                                                           |                                                                                                                                                                                |
| IPI00273742.3 |        | Dnahc1  |                                                           |                                                                                                                                                                                    | CGMVYLEPSILGLMPFVECWLKR,A<br>LFRPVAMMVPDYAMIAEISLYSFGF<br>NEANVLAK,ELYTEMAVIWLLPEAN<br>R,KYPLMK,DSWISTLK,LEEFEQIQS<br>QTFSQVQMFLK                                              |
| IPI00849953.1 |        | Dnahc10 | dynein, axonemal, heavy chain 10                          |                                                                                                                                                                                    | VLVVDLPILKIIPTEGHRLLK,LQAHCA<br>LLFEVGDLQYASPATVSR,TLSLIGE<br>VIEIWMVLVQR,SAACEALLEEATNT<br>AIAEEK,ELEALGAK,KVLEVIK                                                            |
| IPI00116310.7 |        | Dnahc2  | dynein, axonemal, heavy chain 2                           |                                                                                                                                                                                    | CGMVYTDYVDLQWKPYPQSWLEK,<br>AHNLEDFFFK                                                                                                                                         |
| IPI00172328.3 | Q91XQ0 | Dnahc8  | Isoform 1 of Dynein heavy chain 8, axonemal               |                                                                                                                                                                                    | KLAKPPHLMR,GTESGEIITLMEDSL<br>MVLGSLLSNR,PIIVVGSLELHTEPM<br>K,THLEDLSLGRPLIEDIR,AATEA<br>LQDFQK,LNLPEIPK                                                                       |
| IPI00132208.1 | P63037 | Dnaja1  | DnaJ homolog subfamily A member 1                         | VHIDK,ITFHGEGDQEPGLEPGDIIIVLD<br>QK,NVVHQLSVTLEDLYNGATR,ETTY<br>YDVLGVKPNATQEELKK,QISQAYEVL<br>ADSK                                                                                | ITFHGEGDQEPGLEPGDIIIVLDQK<br>,TIVITSHPGQIVK,ILEVHIDK,HYN<br>GEAYEDDEHHPR                                                                                                       |
| IPI00136251.1 | Q9QYJ0 | Dnaja2  | DnaJ homolog subfamily A member 2                         | QLAPGMVQQMQSVCSDCNAGEGEVIN<br>EK,LYDILGVPPGASENELK,LYDILGVP<br>PGASENELKK,LSELEDLLPSRPEVNP<br>VIGETEEVELQEFDSTR,VINEK,VSLED<br>LYNGK,ITFTGEADQAPGVEPGDIVLLL<br>QEK,FDVQFPENNWINPDK | IGLVEALCGFQFTFKHLDAR,ITFT<br>GEADQAPGVEPGDIVLLLQEK,IG<br>LVEALCGFQFTFK<br>VIEPGCVR,LSELEDLLPSRPEVNPV<br>IGETEEVELQEFDSTR,IGLVEALCG<br>FQFTFK,FDVQFPENNWINPDK                   |
| IPI00136253.3 | Q9QYJ3 | Dnajb1  | DnaJ homolog subfamily B member 1                         | NPFDTFFGQR,EIAEAYDVLS DPR,EGD<br>QTSNNIPADIVFVLK                                                                                                                                   |                                                                                                                                                                                |
| IPI00320241.1 | Q99KV1 | Dnajb11 | DnaJ homolog subfamily B member 11                        | GSLIITFDVDFPK,FQDLGAAYEVLSDS<br>EK,LALQLHPDRNPDDPQAQEK                                                                                                                             |                                                                                                                                                                                |
| IPI00666885.2 | Q8CHD7 | Dnajc13 | MKIAA0678 protein                                         |                                                                                                                                                                                    | LAVASATETLK,ELIVGEIFVR,IVD<br>GDPENIILK                                                                                                                                        |
| IPI00128371.1 | Q91WT4 | Dnajc17 | DnaJ homolog subfamily C member 17                        | ELLQMDLYALLGIEEK,AAELFHQLSQA<br>LEVLTDAAAR,YGEVNLNLVLSR                                                                                                                            |                                                                                                                                                                                |

|               |        |         |                                                    |                                                                                                                                                     |                                                                                                                                                                                  |                                                                                              |
|---------------|--------|---------|----------------------------------------------------|-----------------------------------------------------------------------------------------------------------------------------------------------------|----------------------------------------------------------------------------------------------------------------------------------------------------------------------------------|----------------------------------------------------------------------------------------------|
| IPI00126317.1 | P54103 | Dnajc2  | DnaJ homolog subfamily C member 2                  | NWSEDDLQLLIK,AFNSVDPTFDNSVPSK,KELSEESEDEELQLEEFMPLK,DNF FQVFSVPVFER,LELASLQGLNEILASSTR                                                              | EHGVASQADSAAPSER,LELASLQGLNEILASSTR                                                                                                                                              | KAAGEPIK,QQALLAKK,LELASLQGLNEILASSTR                                                         |
| IPI00755714.3 |        | Dnajc21 | DnaJ (Hsp40) homolog, subfamily C, member 21       | VVFELIAK,NLDNAAEAAEQFK,LIQAAYDVLSDPQER,EFGDGSDENEVEDQEP                                                                                             |                                                                                                                                                                                  |                                                                                              |
| IPI00331385.2 | Q9QYI3 | Dnajc7  | DnaJ homolog subfamily C member 7                  |                                                                                                                                                     | HSGASAEVQKEEEEK,HSGASAEVQKEEEEK                                                                                                                                                  |                                                                                              |
| IPI00463344.5 |        | Dnajc8  | 34 kDa protein                                     | EYVEHTVK,AFEAVDK,ALDVIQAGK,P GSSYFNLNPFVFLQIDPEVTDEEIKK,L TRPGSSYFNLNPFVFLQIDPEVTDEEIK,PGSSYFNLNPFVFLQIDPEVTDEEIK,EGKPTNVEEDDPELFEK,DSVLTSK         |                                                                                                                                                                                  |                                                                                              |
| IPI00556723.1 | Q8K1M6 | Dnm11   | Isoform 1 of Dynammin-1-like protein               |                                                                                                                                                     |                                                                                                                                                                                  | SKPIPIIMPASPQK,TLESVDPLGGLNTIDILTAIR,IIQHCSNYSTQELLR,LGII GVVNR,LQDVFNTVGDIIQLPQIVV VGTQSSGK |
| IPI00131445.2 | P39054 | Dnm2    | Isoform 1 of Dynammin-2                            | NLVDSYVAIINK,YMLPLDNLK                                                                                                                              |                                                                                                                                                                                  |                                                                                              |
| IPI00469323.1 | Q7TSJ0 | Dnmt1   | Cytosine-specific methyltransferase                | YQQHPEDAVDEPQMLTSEK,LNLLHEFLQTEIK,VPALASPAGSLPDHVR                                                                                                  | EARPETHLDEDEDGKK,KLESHTVPVQSR,EAEPEQVAPETPEDRDEDEREEK,LVYQIFDFFFSEQIEK,AIIAAAPGEK,FFLLENVR,FYRPE NTHR,FYFLEAYNSK,IVVEFLQNN PDAVYEDLINK,VLEQIEEVDGR,A CQLSVVDDDKK,VVDTESGAAAA VEK | VPALASPAGSLPDHVR,FYRPENTHR,LPLFPEPLHVAFPR                                                    |
| IPI00131694.5 | O88508 | Dnmt3a  | Isoform 1 of DNA (cytosine-5)-methyltransferase 3A |                                                                                                                                                     | GFGIGELVWVGK,KGLYEGTGR,KA IYEVLQVASSR,DLGIQVDR,LFFE FYR,AIYEVLQVASSR                                                                                                             | HLFAPLK,NIEDICISCGSLNVTLEHP LFIGGMCQNCK,HIQEWGPFDLVIG GSPCNDLSIVNPARK                        |
| IPI00757806.1 | Q3KR45 | Dnmt3b  | DNA methyltransferase 3B isoform 5                 |                                                                                                                                                     | LVALGLFSQHFNLATFNK,KGLYEGTGR,YIASEVCAESIAVGTVK,VL SLFDGIATGYLVLK                                                                                                                 |                                                                                              |
| IPI00109459.1 | Q9CWR8 | Dnmt3l  | DNA (cytosine-5)-methyltransferase 3-like          |                                                                                                                                                     | YVEDVTNVVR,FLQTEAVTLQDVR,EEEYLQAQVR                                                                                                                                              |                                                                                              |
| IPI00331394.3 | Q3TVK3 | Dnpep   | aspartyl aminopeptidase isoform a                  |                                                                                                                                                     |                                                                                                                                                                                  | MVTLYDNEEVGSESAQGAQSLLTE LILR,NINENFGPNTEIHLVPILATAVQ EELEK,ETACTTGVLTQLTLFK                 |
| IPI00222462.4 |        | Dock6   | dedicator of cytokinesis 6                         | YQHLSTAYSPITTETQR,DLIEFPVDDL ELLK                                                                                                                   |                                                                                                                                                                                  |                                                                                              |
| IPI00882020.1 |        | Dpf2    | Putative uncharacterized protein                   | KGPDGLALPNNYCDFCLGDSK,IIEPD DFLDDLDDEDYEEDTPK,LDASILED R,VDDDSLGEFPVSNSR,LSFSPKPD TDQTLK,GPGLASGQLYSYPAR,EGLISQD GSSLEALLR,IIEPDDFLDDLDDEDYEE DTPKR |                                                                                                                                                                                  |                                                                                              |

|               |          |        |                                                             |                                                                                                                                                                                                                                                                                                                         |                                                                                                                                              |                                                                                                                                   |
|---------------|----------|--------|-------------------------------------------------------------|-------------------------------------------------------------------------------------------------------------------------------------------------------------------------------------------------------------------------------------------------------------------------------------------------------------------------|----------------------------------------------------------------------------------------------------------------------------------------------|-----------------------------------------------------------------------------------------------------------------------------------|
| IPI00116134.1 | Q99KK7   | Dpp3   | Dipeptidyl-peptidase 3                                      |                                                                                                                                                                                                                                                                                                                         | FPEDGPELEEVLIQLAAADAR,VLL<br>EAGEGLVTPTTGS DGRPDAR,<br>AAQRPEEV R                                                                            |                                                                                                                                   |
| IPI00173116.2 | Q9CQS7   | Dppa5a | Developmental pluripotency-associated protein 5A            | MSHIEQVSQAMFELK,VPEDLKDPEVF<br>QVQSLVLK,NLESPEELIEVFIYGSQNN<br>K                                                                                                                                                                                                                                                        | VPEDLKDPEVFQVQSLVLK,NLES<br>PEELIEVFIYGSQNNK                                                                                                 |                                                                                                                                   |
| IPI00117168.3 | Q99LT0   | Dpy30  | Protein dpy-30 homolog                                      | ERPPNPIEF LASYLLK,AYLDQTVVPILL<br>QGLAVLAK                                                                                                                                                                                                                                                                              | ERPPNPIEF LASYLLK,AYLDQTVV<br>PILLQGLAVLAK                                                                                                   | ERPPNPIEF LASYLLK,AYLDQTVVPI<br>LLQGLAVLAK,VDLQSLPTR                                                                              |
| IPI00263313.1 | P32233   | Drg1   | Developmentally-regulated GTP-binding protein 1             | IIENELEGFGIR,IGFVGFPSVGK,IDQISI<br>EELDIIYK,SDATADDLIDVVEG NR,IQLL<br>DLPGIIEGAK                                                                                                                                                                                                                                        | IDQISIEELDIYK,IAEIEAEMAR                                                                                                                     | STLLSNLAGVYSEVAAYEFTLLTV<br>PGVIR,IGFVGFPSVGK,IQLLDLPGII<br>EGAK                                                                  |
| IPI00134820.1 | Q9QXB9   | Drg2   | Developmentally-regulated GTP-binding protein 2             | GANIQLLDLPGIIEGAAQGR,VALIGFPS<br>VGK                                                                                                                                                                                                                                                                                    |                                                                                                                                              | GANIQLLDLPGIIEGAAQGR,KPNSV<br>VISC GMK                                                                                            |
| IPI00553419.3 |          | Dsp    | desmoplakin                                                 | ITNLTQQLEQASIVK,SAIQLEEEYENL<br>LK,KELIEK,TLELQGLINDLQR,QLGIY<br>EAMKIGLVR,AVTGYNDPETGNIISLFQ<br>AMNK,SVQNDSQALAEVLNQLK,PGTA<br>LELLEAQAATGFIVDPVSNLR,DYELQL<br>ASYTSGLETLLNIPIK,GFFDPNTEENLT<br>YLQLK,ENAA YQFFEEAQSTEAYLK,N<br>MPLQHLLLEQIK,IGLVRPGTALELLEAQ<br>AATGFIVDPVSNLR,GYFNEELSEILSD<br>PSDDTK,ALLQAILQTEDMLK |                                                                                                                                              | LLQLQEQMRALYKAISVPR,GAGAIA<br>GASAPK,QEDYMK,KNLIDR                                                                                |
| IPI00230692.1 | Q91ZU6-4 | Dst    | Isoform 4 of Bullous pemphigoid antigen 1, isoforms 1/2/3/4 | DVPELSQHMQUESTAK,LGELCSEPPE<br>HSESTSGSKER,LFLSYLMVNSYMDAH<br>TGQR                                                                                                                                                                                                                                                      | QVPVVKPSLGTEDLRK,EQVETLR<br>PWIDR,VIAGTINQTTGEVLSVFQA<br>VLR                                                                                 | TISEGENLLLK,ELMVSVLGPLSIDPN<br>MLNTQK,QLEGILK,RGSDASDFDIS<br>EIQSVCS DVETVPQTHRVPVR,EPIA<br>LDPK,GSDASDFDISEIQSVCS DVET<br>VPQTHR |
| IPI00127942.4 | Q9R0P5   | Dstn   | Destrin                                                     | EELMFFLWAPEQAPLK,MIYASSK,KEE<br>LMFFLWAPEQAPLK,IFYDMK,LGGSLI<br>VAFEGSPV,EILVGDVGATITDPFK,HE<br>YQANGPEDLNR                                                                                                                                                                                                             | KCSTPEEIKK,YALYDASFETK,KE<br>ELMFFLWAPEQAPLK,LGGSLIVA<br>FEGSPV,EILVGDVGATITDPFK,H<br>EYQANGPEDLNR,KAVIFCLSADK R<br>K,AVIFCLSADKK,AVIFCLSADK | YALYDASFETK,EILVGDVGATITDP<br>FK,HFVGM LPEK,HEYQANGPEDLN                                                                          |
| IPI00896629.1 |          | Dtymk  | 26 kDa protein                                              | LNQGVTLVLDR,QLMEEK                                                                                                                                                                                                                                                                                                      |                                                                                                                                              | GALIVLEGVDR,LVTALCASGHR,L<br>NQGVTLVLDR                                                                                           |
| IPI00129184.3 | Q91X11   | Dus3l  | Isoform 1 of tRNA-dihydrouridine synthase 3-like            | GVNGVLDVPLTVKMRTGVQER,DFTH<br>YGLEHWGSDTQGVER,FAGAHLGPEG<br>QNLVQEEVVAR                                                                                                                                                                                                                                                 |                                                                                                                                              |                                                                                                                                   |
| IPI00380332.4 | Q7TNL7   | Dusp9  | Dual specificity phosphatase 9, isoform CRA_a               |                                                                                                                                                                                                                                                                                                                         |                                                                                                                                              | KSNISPNFNFMGQLLDFER,SLLPG<br>PPLQPPPPAPVLLYDQGS SGQCHR                                                                            |
| IPI00187434.1 | Q8VCG1   | Dut    | deoxyuridine triphosphatase isoform 1                       | HFIDVGAGVIDEDYR,GNVGVVLFNFG<br>K,ISYPDLEEVQTLDDTER,AAGYDLFS<br>AYDYTISPMEK                                                                                                                                                                                                                                              | MPLLSVLLR,GNVGVVLFNFGK,L<br>SEHATAPTR,ISYPDLEEVQTLDD<br>TER,IAQLICER                                                                         |                                                                                                                                   |

|               |        |          |                                                   |                                                                                                                                                                                                                                                                                                                                                                                                                                                                                                                                                                                                                                                                                                                                                                                                   |
|---------------|--------|----------|---------------------------------------------------|---------------------------------------------------------------------------------------------------------------------------------------------------------------------------------------------------------------------------------------------------------------------------------------------------------------------------------------------------------------------------------------------------------------------------------------------------------------------------------------------------------------------------------------------------------------------------------------------------------------------------------------------------------------------------------------------------------------------------------------------------------------------------------------------------|
| IPI00828867.2 | A2AX52 | Dvwa     | Collagen alpha-4(VI) chain                        | RGNSGFPLAGTDPDQGPPEGK<br>GTK,GEPGFPYGVQGEDGNP<br>GR                                                                                                                                                                                                                                                                                                                                                                                                                                                                                                                                                                                                                                                                                                                                               |
| IPI00119876.1 | Q9JHU4 | Dync1h1  | Cytoplasmic dynein 1 heavy chain 1                | EFISYNINIDIHYGVK,EDLDKVEPA<br>VIEAQNNAVK,LLSLSNAISTVPLTQ<br>LR,TLINELVK,VPQIEVETHK,KLE<br>HLITELVHQR,FYFVGDEDLLEIIG<br>NSK,LLNTFLER,TKPVTGNLRPEE<br>ALQALTIYEGK,YATLATVSR,EAA<br>EVTR,FNYGFEYLVGVQDK,SVLVS<br>AGNVK,VPVNLRL,LLLIQAFRPDR<br>,VKDDIESLHDK,LAETVFNQEK,<br>EWWNTYELDLVNYQNK,LVAEDIP<br>LLFSLSDVFPVGVQYHR,INMLVIE<br>LK,SLLQALNEVK,RVEDVLGK,VT<br>FVNFTVTR,CLGSLFMSMLHQACR,<br>LVQTPLEDR,WQALLVQIR,LEGV<br>EGVAHIIDPK,INEWLTVEK,LLAE<br>SVTEVEIFGK,VLQLYQITQINHGL<br>MMVGPSPSGSK,DVLLVAQGEMA<br>LEEFK,VDDLLIIEEK,LVEAISR,E<br>NFIPTIVNFSAAEISDAIR,TVENIK<br>DPLFR,NTISLLVAGLK,IQGLTVEQ<br>AEAVR,YQGVVHYELTEEEK,GI<br>FEALRPLETLPVEGLIR,HVPVVVYV<br>DYPGPASLTQIYGTFR,VFYEEE<br>LDVPLVLFNEVDHVLV,YKEEYA<br>VLISEAQAIK,VPLAIVNK,VQVALE<br>ELQDLK,ADLAAVEAK,VLTLSEDS<br>PYETLHSFISNAVAPFFK |
| IPI00776018.1 | A2BFF9 | Dync1i2  | Dynein cytoplasmic 1 intermediate chain 2         | EDEEEEDDVATPKPPVEPEEEK,KEAA<br>VSVQEEESDLEK,EAAVSVQEEESDLEK,<br>QQILHSEEFLSFFDHSTR                                                                                                                                                                                                                                                                                                                                                                                                                                                                                                                                                                                                                                                                                                                |
| IPI00153421.1 | Q8R1Q8 | Dync1li1 | Cytoplasmic dynein 1 light intermediate chain 1   | VEDNFEDIITKPPVR,AGATSEGVLANF<br>FNSLLSK                                                                                                                                                                                                                                                                                                                                                                                                                                                                                                                                                                                                                                                                                                                                                           |
| IPI00132734.1 | Q9D0M5 | Dynll2   | Dynein light chain 2, cytoplasmic                 | NFGSYVTHETK,DIAAYIK                                                                                                                                                                                                                                                                                                                                                                                                                                                                                                                                                                                                                                                                                                                                                                               |
| IPI00111829.1 | Q9D903 | Ebna1bp2 | Probable rRNA-processing protein EBP2             | GFSDKLDLEGDQKPVER,QAQAAVL<br>AVLPR,GLLKPGLNVVLEKPK,LDVTLG<br>PVPEVSETQPTPNQDQK                                                                                                                                                                                                                                                                                                                                                                                                                                                                                                                                                                                                                                                                                                                    |
| IPI00454049.4 | Q8BH95 | Echs1    | Enoyl-CoA hydratase, mitochondrial                | ALNALCNGLIEELNQALETFEQDP<br>AVGAVLTGGDK,AFAAGADIK,LV<br>EEAIQCAEK                                                                                                                                                                                                                                                                                                                                                                                                                                                                                                                                                                                                                                                                                                                                 |
| IPI00117049.1 | O54693 | Eda      | Isoform TAA of Ectodysplasin-A                    | HTTFFGAIR,AYSEESRR                                                                                                                                                                                                                                                                                                                                                                                                                                                                                                                                                                                                                                                                                                                                                                                |
| IPI00330066.5 | Q3UJB9 | Edc4     | Isoform 1 of Enhancer of mRNA-decapping protein 4 | LCAQLEGLQSTVTDHVER,ALQD<br>VQIR,GEVSVALK,AEVQHQLHVA<br>VGSLQESILAQVQR                                                                                                                                                                                                                                                                                                                                                                                                                                                                                                                                                                                                                                                                                                                             |
|               |        |          |                                                   | GGQLQEQLTQQLSQALSSAVAGR,<br>GLVSTLQSATEQMAATVSSSVR,LF<br>QFLQADPHNSLSK                                                                                                                                                                                                                                                                                                                                                                                                                                                                                                                                                                                                                                                                                                                            |

|               |          |        |                                                               |                                                                                                                                                                                                                                                                                                                                                                                                                                                                            |                                                                                                                                                                                                                                                                                                                                                                                                                        |                                                                                                                                                                                                                                                                                                                                                                                                                                          |
|---------------|----------|--------|---------------------------------------------------------------|----------------------------------------------------------------------------------------------------------------------------------------------------------------------------------------------------------------------------------------------------------------------------------------------------------------------------------------------------------------------------------------------------------------------------------------------------------------------------|------------------------------------------------------------------------------------------------------------------------------------------------------------------------------------------------------------------------------------------------------------------------------------------------------------------------------------------------------------------------------------------------------------------------|------------------------------------------------------------------------------------------------------------------------------------------------------------------------------------------------------------------------------------------------------------------------------------------------------------------------------------------------------------------------------------------------------------------------------------------|
| IP100471325.2 | Q9JMG1   | Eef1   | Endothelial differentiation-related factor 1                  | INEKPQVIADYESGR,GKDIGKPIEK,LD<br>RETEELHHDR,QAILAAQR                                                                                                                                                                                                                                                                                                                                                                                                                       |                                                                                                                                                                                                                                                                                                                                                                                                                        |                                                                                                                                                                                                                                                                                                                                                                                                                                          |
| IP100900431.1 | Q921E6-2 | Eed    | Isoform 2 of Polycomb protein EED                             |                                                                                                                                                                                                                                                                                                                                                                                                                                                                            | MAGSHARPPRR,HYVGHGNAINEL<br>K                                                                                                                                                                                                                                                                                                                                                                                          |                                                                                                                                                                                                                                                                                                                                                                                                                                          |
| IP100307837.6 | P10126   | Eef1a1 | Elongation factor 1-alpha 1                                   | THINIVIGHVDSGKSTTTGHLIYK,QTV<br>AVGVK,KLEDGPK,TIEKFEKAAEMG<br>K,SGDAAIVDMVPGKPMCVESFSDYP<br>PLGR,EKTHINIVIGHVDSGK,NMITGT<br>SQADCAVLIVAAGVGEFEAGISK,PGM<br>VVTFAFVNVTTEVK,LPLQDVYK,YEEI<br>VK,YYVTIIDAPGHR,YEEIVKEVSTYIKK<br>,SVMHHEALSEALPGDNVGFNVK,TH<br>INIVIGHVDSGK,VETGVLKPGMVVTF<br>APVNVTEVK,SGDAAIVDMVPGK,EA<br>AEMGK,IGGIGTVPVGR,MDSTEPPYS<br>QK,STTTGHLIYK,IGYNPDTVAFVPIG<br>WNGDNMLEPSANMPWFK,RYEEIVK,<br>QLIVGVNKMDSTEPPYSQK,EVSTYIK,<br>EHALLAYTLGVK,QLIVGVNK | DGSASGTTLEALDCILPPTRPTD<br>K,QTVAVGVK,KLEDGPK,THINIV<br>VIGHVDSGK,VETGVLKPGMVVTF<br>APVNVTEVK,MDSTEPPYSQK,S<br>TTTGHLIYK,IGGIGTVPVGR,SGD<br>AAIVDMVPGKPMCVESFSDYPL<br>GR,IGYNPDTVAFVPIGWN<br>MLEPSANMPWFK,NMITGTSQAD<br>CAVLIVAAGVGEFEAGISKNGQT<br>R,RYEEIVK,EVSTYIK,NMITGTSQ<br>ADCAVLIVAAGVGEFEAGISK,LPL<br>QDVYK,YYVTIIDAPGHR,YEEIVK,<br>DGSASGTTLEALDCILPPTRPTD<br>KPLR,EHALLAYTLGVK,KDGSAS<br>GTTLEALDCILPPTRPTDK | DGSASGTTLEALDCILPPTRPTDK,<br>QTVAVGVK,VETGVLKPGMVVTF<br>PVNVTEVK,SGDAAIVDMVPGK,D<br>GSASGTTLEALDCILPPTR,MDSTE<br>PPYSQK,STTTGHLIYK,IGGIGTVP<br>GR,SGDAAIVDMVPGKPMCVESFS<br>DYPPLGR,IGYNPDTVAFVPIGWN<br>GDNMLEPSANMPWFK,RYEEIVK,E<br>VSTYIK,NMITGTSQADCAVLIVAAG<br>VGEFEAGISK,PMCVESFSDYPLG<br>R,LPLQDVYK,PGMVVTFAPVNVTE<br>VK,YEEIVK,YYVTIIDAPGHR,EHAL<br>AYTLGVK,DGSASGTTLEALDCILP<br>PTRPTDKPLR,KDGSASGTTLEAL<br>DCILPPTRPTDK,QLIVGVNK |
| IP100119667.1 | P62631   | Eef1a2 | Elongation factor 1-alpha 2                                   | THINIVIGHVDSGKSTTTGHLIYK,QTV<br>AVGVK,TIEKFEKAAEMGK,THINIVI<br>GHVDSGK,EEAEMGK,STTTGHLIYK,I<br>GGIGTVPVGR,EKTHINIVIGHVDSGK,<br>YYVTIIDAPGHR,NMITGTSQADCAVLIV<br>AAGVGEFEAGISK,LPLQDVYK,EHALL<br>AYTLGVK,QLIVGVNK,SVMHHEALSE<br>ALPGDNVGFNVK                                                                                                                                                                                                                                |                                                                                                                                                                                                                                                                                                                                                                                                                        |                                                                                                                                                                                                                                                                                                                                                                                                                                          |
| IP100320208.3 | O70251   | Eef1b2 | Elongation factor 1-beta                                      | TPAGLQVLNDYLADK,SIQADGLVWGS<br>SK,SSILLDVKPWDDTDMTK,YGPSS<br>VEDTTGSGAADA                                                                                                                                                                                                                                                                                                                                                                                                  | TPAGLQVLNDYLADK,SIQADGLVW<br>GSSK,LAQYESK,LQIQCVVEDDK,L<br>EECVR,KLQIQCVVEDDK,VGTDML<br>EEQITAFEDYVQSMDDAAFNK,WYN<br>HIK,YGPSSVEDTTGSGAADA                                                                                                                                                                                                                                                                             |                                                                                                                                                                                                                                                                                                                                                                                                                                          |
| IP100118875.4 | Q68FG5   | Eef1d  | eukaryotic translation elongation factor 1<br>delta isoform a | VGTDLLEEEITKFEHVQSVDAIAFNK,I<br>TSLEVENQNL,SLAGSSGPGASSGP<br>GGDHSELIVR,GVVQDLQQAISK,FEHV<br>VQSVDAIAFNK,SIQLDGLVWGASK,VG<br>TDLLEEEITK                                                                                                                                                                                                                                                                                                                                    | ITSLEVENQNL,LQIQCVVEDDK<br>VGTDLLEEEITK,SLAGSSGPGAS<br>SGPGGDHSELIVR,QVEPTK,GV<br>VQDLQQAISK,FEHVQSVDAIAF<br>NK,SIQLDGLVWGASK,LVPVGYG<br>IR,ATAPQTHVSPMR                                                                                                                                                                                                                                                               | ITSLEVENQNL,LQIQCVVEDDK,L<br>QIQCVVEDDKVGTDLLEEEITK,SLA<br>GSSGPGASSGPGGDHSELIVR,GV<br>VQDLQQAISK,KLQIQCVVEDDK,VG<br>TDLLEEEITK                                                                                                                                                                                                                                                                                                          |
| IP100620302.3 | P57776-2 | Eef1d  | Isoform 2 of Elongation factor 1-delta                        | FEEHVQSVDAIAFDK,ITSLEVENQNL<br>,FEEHVQSVDAIAFDKI,GVVQDLQQA<br>ISK,SIQLDGLVWGASK,VGTDLLEEEIT<br>K                                                                                                                                                                                                                                                                                                                                                                           |                                                                                                                                                                                                                                                                                                                                                                                                                        |                                                                                                                                                                                                                                                                                                                                                                                                                                          |

|               |        |        |                                                      |                                                                                                 |                                                                                                                                                                                                                                                                                                                                                                                                                                                                                                                                                                                                                                                                                                                    |                                                                                                                                                                                                                                                                                                                                                                                                                                                                                                                                                                                                                                  |
|---------------|--------|--------|------------------------------------------------------|-------------------------------------------------------------------------------------------------|--------------------------------------------------------------------------------------------------------------------------------------------------------------------------------------------------------------------------------------------------------------------------------------------------------------------------------------------------------------------------------------------------------------------------------------------------------------------------------------------------------------------------------------------------------------------------------------------------------------------------------------------------------------------------------------------------------------------|----------------------------------------------------------------------------------------------------------------------------------------------------------------------------------------------------------------------------------------------------------------------------------------------------------------------------------------------------------------------------------------------------------------------------------------------------------------------------------------------------------------------------------------------------------------------------------------------------------------------------------|
| IPI00133928.1 | Q9D1M4 | Eef1e1 | Eukaryotic translation elongation factor 1 epsilon-1 | EHLLGSTAE EK,QIPVLQTNNGPSLMG<br>LSTIATHLVK                                                      | EHLLGSTAE EK,FIVDLTVQEK                                                                                                                                                                                                                                                                                                                                                                                                                                                                                                                                                                                                                                                                                            | EHLLGSTAE EK,QLHSSIVFIK,SLGL<br>KPGNK,QIPVLQTNNGPSLMGLSTIA<br>THLVK                                                                                                                                                                                                                                                                                                                                                                                                                                                                                                                                                              |
| IPI00318841.4 | Q9D8N0 | Eef1g  | Elongation factor 1-gamma                            |                                                                                                 | DGWSLWYAEYR,RILGLLDTHLK,<br>VPAFEGDDGFCVFESNAIYYVS<br>NEELR,ILGLLDTHLK,KFAESQPK,<br>DPFAHLPK,LDPGSEETQTLVR,A<br>LIAAQYSGAQVR,TFLVGER,YSN<br>EDTLSVALPYFWEHFDK,GQELA<br>FPLSPDWQVDYESYTW,VL SAP<br>PHFHFGQTN,STFVLDEFK,TP<br>EFLR,STFVLDEFK,AKDPFAHLPK<br>,FAESQPK,KLDPGSEETQTLVR                                                                                                                                                                                                                                                                                                                                                                                                                                   | ILGLLDTHLK,MAQFDAK,DPFAHLP<br>K,KFAESQPK,LDPGSEETQTLVR,Q<br>VLEPSFR,ALIAAQYSGAQVR,TFLV<br>GER,YSNEDTLSVALPYFWEHFDK,<br>VLSAPPHFHFGQTNR,WFLT CINQP<br>QFR,VTLADITVVCTLLWLYKQVLEP<br>SFR,TPEFLR,QAFPNTNR,FAESQ<br>K                                                                                                                                                                                                                                                                                                                                                                                                                |
| IPI00466069.3 | P58252 | Eef2   | Elongation factor 2                                  | KSDPVVSYRETVSEESNVLCLSK,ARP<br>FPDGLAEDIDKGEVSAR,EGIPALDNFL<br>DKL,VTDGALVVVDCVSGVCVQTETVL<br>R | FVSPVVR,ARFPDGLAEDIDK<br>EVSAR,TFCQLIDPIFK,KEDLYLK<br>PIQR,RWLPAGDALLQMITIHLPS<br>VTAQK,ETVSEESNVLCLSK,EDL<br>YLKPIQR,SDPVVSYR,GVQYLNEI<br>K,NMSVIAHVDHGK,GGGQIIPAR<br>,DLEEDHACIPIK,DSVAGFQWAT<br>K,GEGQLSAAER,DGSGFLINLIDSPG<br>PGHVDFSSEVTAALR,KIWCFCG<br>DGTGPNILTDITK,PSQVVAETR,D<br>LEEDHACIPIK,STLTDLSLVCK,NP<br>ADLPK,STAISLFYELSENDLNFIK,<br>AYLPVNESFGFTADLR,YVEPIED<br>VPCGNIVGLVGVQFLVK,LMEPI<br>YLVEIQCPQVGGIYVGLNR,VT<br>DGALVVVDCVSGVCVQTETVLR,<br>SDPMVQCIIIEESGEHIIAGAGELH<br>LEICK,IMGPNYTPGK,EGIPALD<br>NFLDKL,IWCFGPDGTGPNILTDIT<br>K,GVQYLNEIKDSVAGFQWATK,<br>WLPAGDALLQMITIHLPSVTAQK<br>,GHVFEESQVAGTPMFVVK,AGIIA<br>SAR,ALLELQLEPEELYQTFQR,YF<br>DPANGK,YEWDVAEAR,VFDAIMN<br>FR,VFSGVVSTGLK | FVSPVVR,TFCQLIDPIFK,ARFP<br>DGLAEDIDKGEVSAR,ETVSEESNV<br>LCLSK,SDPVVSYR,FYAFGR,GVQY<br>LNEIK,EGALCEENMR,NMSVIAHVD<br>HKG,GGGQIIPAR,DLEEDHACIPIK,<br>GEGQLSAAER,DGSGFLINLIDSPG<br>HVDVDFSSEVTAALR,PSQVVAETR,KV<br>EDMMK,CELLYEGPPDDEAAMGIK,<br>KEDLYLK,KSDPVVSYR,EGIPALDN<br>FLDK,SNTGGQAFQPCVFDHWQILP<br>GDPFDN SSR,STLTDLSLVCK,NPADL<br>PK,STAISLFYELSENDLNFIK,AYLPV<br>NESFGFTADLR,CLYASVLTAQPR,L<br>MEPIYLVEIQCPQVGGIYVGLNR,<br>KLWGDR,EGIPALDNFLDKL,IWCFG<br>PDGTGPNILTDITK,GVQYLNEIKDS<br>VVAGFQWATK,WLPAGDALLQMITI<br>HLPSPVTAQK,GHVFEESQVAGTP<br>MFVVK,AGIIASAR,ALLELQLEPEEL<br>YQTFQR,YFDPANGK,YEWDVAEAR<br>,VFSGVVSTGLK |
| IPI00226872.1 | Q8C845 | Efh2   | Putative uncharacterized protein                     | SMIQEVEDDFDSK,FE EIKAEQEER,D<br>GFIDLMELK                                                       |                                                                                                                                                                                                                                                                                                                                                                                                                                                                                                                                                                                                                                                                                                                    |                                                                                                                                                                                                                                                                                                                                                                                                                                                                                                                                                                                                                                  |

|               |        |        |                                                                |                                                                                                                                                                                                                                                                                                                                                   |                                                                                                                                                                                                                         |
|---------------|--------|--------|----------------------------------------------------------------|---------------------------------------------------------------------------------------------------------------------------------------------------------------------------------------------------------------------------------------------------------------------------------------------------------------------------------------------------|-------------------------------------------------------------------------------------------------------------------------------------------------------------------------------------------------------------------------|
| IPI00649950.3 | A2AH85 | Eftud2 | elongation factor Tu GTP binding domain containing 2 isoform b | IAVEPVNPSELPK,FNTTSVIKIAVE<br>PVNPSELPK,GGGQIIPTAR,VPAG<br>NWWLIEGVDQPIVK,GLSEDVSISK<br>,GLAEDIENEVQITWNR,ILDAVV<br>AQEPLHR,VLSGTIHAGQPVK,AFI<br>PAIDSFGFETDLR,SFVEFILEPLY<br>K                                                                                                                                                                   | FNTTSVIKIAVEPVNPSELPK,KFTLM<br>EQTLPVTVYEMDFLADLMDNSELIR,<br>LAVTVCINK,GGGQIIPTAR,YHIEVN<br>R,ILAQVVGVDVDTSLPR,RVVYSAFL<br>MATPR,TCFVDCLIEQTHPEIR,ILDA<br>VVAQEPLHR,VLSGTIHAGQPVK,AF<br>IPAIDSFGFETDLR,NVTLCGHLHHG<br>K |
| IPI00845795.1 | Q69ZW3 | Ehbp1  | Isoform 1 of EH domain-binding protein 1                       | EQLLLDELVALVDKR,EQLLLDELVALV<br>DK                                                                                                                                                                                                                                                                                                                |                                                                                                                                                                                                                         |
| IPI00126083.3 | Q9WVK4 | Ehd1   | EH domain-containing protein 1                                 |                                                                                                                                                                                                                                                                                                                                                   | FQALKPK,LNAFGNAFLNR,ELVNNL<br>GEIYQK,LEGHELPADLPPHIPPSSK                                                                                                                                                                |
| IPI00318671.2 | Q1MWP8 | Ehd4   | EH-domain containing 4-KJR (Fragment)                          | LFEAEAQDLFR,EYQISAGDFPEVK,SG<br>GMDAVQTVTGGLR                                                                                                                                                                                                                                                                                                     |                                                                                                                                                                                                                         |
| IPI00153608.3 | Q60872 | Eif1a  | Eukaryotic translation initiation factor 1A                    |                                                                                                                                                                                                                                                                                                                                                   | AYGELPEHAK,VWINTSDIILIGLR,<br>ELVFKEDGQEYAQVIK,EDGQEY<br>AQVIK                                                                                                                                                          |
| IPI00308984.6 | Q8BMJ3 | Eif1ay | Eukaryotic translation initiation factor 1A,<br>X-chromosomal  |                                                                                                                                                                                                                                                                                                                                                   | AYGELPEHAK,ELVFKEDGQEYA<br>QVIK,VWINTSDIILVGLR,EDGQEY<br>AQVIK                                                                                                                                                          |
| IPI00318464.2 | Q9CXU9 | Eif1b  | Eukaryotic translation initiation factor 1b                    | GDDLIPAGTEDYIHIR,NICQFLLEVIGV<br>K,FACNGTVIEHPEYGEVIQLQGDQR,T<br>LTTVQGIADDYDK                                                                                                                                                                                                                                                                    | GDDLIPAGTEDYIHIR,TLTTVQGIAD<br>DYDK                                                                                                                                                                                     |
| IPI00119806.6 | Q8BJW6 | Eif2a  | Isoform 1 of Eukaryotic translation<br>initiation factor 2A    |                                                                                                                                                                                                                                                                                                                                                   | YQAVPSEVPSEEPK,VAVYVPGS<br>K,VNIINVANK,LYQYPNFAGPQAA<br>LANK,ATAVLVIASTEVDK,VATAY<br>RPPALR,GLLHSFDLPK,NTVTQS<br>ASGDPEVDKK,YDVPSNGELWQV<br>SWQPFLDGIFPAK,ETALLQELED<br>LELGV                                           |
| IPI00474446.4 | Q6ZWX6 | Eif2s1 | Eukaryotic translation initiation factor 2<br>subunit 1        | EALRAGLNCSTETMPIKINLIAPPR,FPE<br>VEDVVMVNVNR,DEQLESFQR,HAVSD<br>PSILDSLNLNEDER,TEGLSVLNQAMA<br>VIK                                                                                                                                                                                                                                                | INLIAPPR,VVTDTDETELAR,FPEVE<br>EDVVMVNVNR,NECVVIR,ADIEV<br>ACYGYEGIDAVK,HAVSDPSILDS<br>LDLNEDEREVLINNINR,RLTPQAV<br>NR,TEGLSVLNQAMAVIK                                                                                  |
| IPI00116302.3 | Q99L45 | Eif2s2 | Eukaryotic translation initiation factor 2<br>subunit 2        | IESDAQEPAEPEDDLDIMLGNNK,FPE<br>EDEILEKDEALEDEDSK,KIFDIDAEAE<br>AIKDVK,LYFLQCETCHSR,DDGISFSS<br>QTAWAGSER,DYTYEELNLR,IESDAQ<br>EPAEPEDDLDIMLGNNK,FPEEDEILEKD<br>EALEDEDSK,KDDGISFSSQTAWAGSE<br>R,KIFDIDAEAEAIK,FPEEDEILEK,DAS<br>DDLDDLNFFNQK,KPFMLDEEGDAQT<br>EETQPSETK,KDASDDLDDLNFFNQK,I<br>FDIDAEAEAIKDVK,IFDIDAEAEAIK,EV<br>EPEPTEEKDVADEEDSR | TGFQAVTGK,DASDDLDDLNFFNQK<br>,SPDTILQK,TSFVNFTDICK,VFNIMR<br>,IFDIDAEAEAIK,FVMKPPQVVR                                                                                                                                   |



|               |        |       |                                                      |                                                                                                                                                  |                                                                                                                                                                                                                      |                                                                                                                                                                                                                        |
|---------------|--------|-------|------------------------------------------------------|--------------------------------------------------------------------------------------------------------------------------------------------------|----------------------------------------------------------------------------------------------------------------------------------------------------------------------------------------------------------------------|------------------------------------------------------------------------------------------------------------------------------------------------------------------------------------------------------------------------|
| IPI00129276.1 | P23116 | Eif3a | p162 protein                                         | VLLATLSIPITPER,TLSEFGSDLNATR                                                                                                                     | AVEDIHGLFSLSK,VLLATLSIPITPER,LLQQVAQIYQSIEFSR,RVPPPALSR,RGLDDDRGPR,YLELCVDL R,ILQEHEQIK,ILQEHEQIKK,FSVLQYVVPEVK,LYHDIAQQAFK,LTSLVPFVDAFQLER,DLYNWLEVEFNPLK,LESLNIQR                                                  | VLLATLSIPITPER,QTIEERK,IGLINDMVR,MHLSQIQR,RLEEIPLIK,TLSEFGSDLNATR,LLDMDGIIVEK,RVPPPALSR,ILQEHEQIK,FSVLQYVVPEVK,LATLLGLQAPPTR,LYHLSR,HCDLQVR,KLEEVER,LYHDIAQQAFK,SGNALFHASTLHR,PGPWRPFVKPGGWR,L TSLVPFVDAFQLER,LESLNIQR |
| IPI00229859.1 | Q8CIJ3 | Eif3b | Eif3b protein                                        |                                                                                                                                                  | GTQGVVTNFEIFR,DRPQEADGIDSVIVVDNVPQVGPDR,ETIIAFWEPNGSK,GHPSAGAEIEGGSDGSAEAEPR,GYIFLEYASPAHAVDAVK,VNLFTDFDK,AKPAAQSEETATSPAASPTPQSAER,FAVLHGEAPR,DQYSVIFESGDR,SPSQEPSAPGK,YVVTSVSWWSHK,TSIFWNDVKDPVSIEER,PRPPTLLSQDQIK | GTQGVVTNFEIFR,FCQLLWRPRPPTLLSQDQIK,GTYLATFHQR,SPSQEPSAPGK,PRPPTLLSQDQIK,FAVLHGEAPR                                                                                                                                     |
| IPI00321647.2 | Q8R1B4 | Eif3c | Eukaryotic translation initiation factor 3 subunit C |                                                                                                                                                  | TEPTAQNLALQLAEK,FEELTNLIR,LNEILQVR,GTEITHAVVIK,ILADLEDYLNELWEDK,TMVQLGICAFR,GCILTLVER,LGSLVENNER,ELLGQGLLLR,ILADLEDYLNELWEDKEGK                                                                                      | TEPTAQNLALQLAEK,FEELTNLIR,GTEITHAVVIK,ILADLEDYLNELWEDK,ELLGQGLLLR,GCILTLVER,LGSLVENNER,ATQIELLQLLVQIAAENNLGCVIVK,ILHTYYK                                                                                               |
| IPI00762774.2 | O70194 | Eif3d | Eukaryotic translation initiation factor 3 subunit D |                                                                                                                                                  | LGDDIDLIVR,EEMDFPQLMK,HVILGTQQFKPNEFASQINLSVENAWGILR,SVYSWDIVVQR,GAVIATEL K                                                                                                                                          |                                                                                                                                                                                                                        |
| IPI00132250.1 | P60229 | Eif3e | Eukaryotic translation initiation factor 3 subunit E |                                                                                                                                                  | HLVFPLEFLSVK,LFIFETFCR,NLYSDDIPHALR,YLTTAVITNK,LDLLSDTNMVDVFAMDVYK                                                                                                                                                   | HLVFPLEFLSVK,WIVNLIR,ECESVLVNDFFLVACLEDFIENAR,TTVVAQLK,RTTVVAQLK,NLYSDDIPHALR                                                                                                                                          |
| IPI00120914.1 | Q9DCH4 | Eif3f | Eukaryotic translation initiation factor 3 subunit F |                                                                                                                                                  | LHPVILASIVDSYER,VSADNTVGR,IQDALSTVLQYAEDVLSGK,VIGTLLGTVDK,VIGLSSDLQVGGASAR                                                                                                                                           | FLMSLVNQVVK,VSADNTVGR,IQDALSTVLQYAEDVLSGK,VIGTLLGTVDK,VIGLSSDLQVGGASAR                                                                                                                                                 |
| IPI00622371.3 | Q9Z1D1 | Eif3g | Eukaryotic translation initiation factor 3 subunit G | ETDLQELFR,ETDLQELFRPFGSISR,GFAFISFHR,PSWADQVEEEGEDDK,GIPLPTGDTSPPELLPGDPLPPP,AIAGVSGFGYDHLILNVEWAK,ELAEQLGLSTGEK,LPGELEPVQAAQSK,EKLPGELEPVQAAQSK | LPGELEPVQAAQSK,VTNLSEDTR                                                                                                                                                                                             | GIPLPTGDTSPPELLPGDPLPPP,LPGELEPVQAAQSK,VTNLSEDTR                                                                                                                                                                       |
| IPI00128202.1 | Q91WK2 | Eif3h | Eukaryotic translation initiation factor 3 subunit H |                                                                                                                                                  | EGTGSTATSSGSAGGAVGK,LFKPHQAPAR,KEGTGSTATSSGSAGGAVGK,SAVADKHELLSLASSNHGK                                                                                                                                              | HELLSLASSNHGK,TAQGSLSLK,EGTGSTATSSGSAGGAVGK,LFKPHQAPAR                                                                                                                                                                 |

|               |          |        |                                                                   |                                                                                                                                                               |                                                                                                                                                                                                                                                                                                                       |                                                                                                                                                                                                                                                                              |
|---------------|----------|--------|-------------------------------------------------------------------|---------------------------------------------------------------------------------------------------------------------------------------------------------------|-----------------------------------------------------------------------------------------------------------------------------------------------------------------------------------------------------------------------------------------------------------------------------------------------------------------------|------------------------------------------------------------------------------------------------------------------------------------------------------------------------------------------------------------------------------------------------------------------------------|
| IPI00269613.6 | Q9QZD9   | Eif3i  | Eukaryotic translation initiation factor 3 subunit I              | PVNSAALSPNYDHVVLGGGQEAMDV<br>TTTSTR,FFHLAFEEEEFGR,DPIVNVWY<br>SVNGER,TERPVNSAALSPNYDHVVL<br>GGGQEAMDVTTTSTR,EGDLLFTVAK<br>DPIVNVWYSVNGER,GHFGPINSVAFH<br>PDGK | FFHLAFEEEEFGR,HVLTGSADNSC<br>R,LFDSTTLEHQK,SGEVLVNVK                                                                                                                                                                                                                                                                  | HVLTGSADNSCR,GHFGPINSVAFH<br>PDGK,ITSAVWGPLGECVIAGHESG<br>ELNQYSAK                                                                                                                                                                                                           |
| IPI00120322.1 | Q9DBZ5   | Eif3k  | Isoform 1 of Eukaryotic translation initiation factor 3 subunit K |                                                                                                                                                               | ENAYDLEANLAVLK,FICHVVGITY<br>QHIDR                                                                                                                                                                                                                                                                                    | ENAYDLEANLAVLK,ALTNLPHTDFT<br>LCK,YNPENLATLER                                                                                                                                                                                                                                |
| IPI00463573.3 | Q8QZY1   | Eif3l  | Eukaryotic translation initiation factor 3 subunit L              | VFSDEVQQAQLSTIR,QLEVYTSGGD<br>PESVAGEYGR                                                                                                                      | IDESIHLQLR,VFSDEVQQAQLS<br>TIR,VFANILLYIQR,NTPWPEAEAI<br>APQVGNDAVFLILYK,VWNVHVSVL<br>NVLHSLVDK,LAGFLDLTEQEFR,V<br>YELQASR,IQLLVFK,MLGYFSLVG<br>LLR,VSGGPSLEQR                                                                                                                                                        | VFSDEVQQAQLSTIR,VLENIELNK,<br>IQLLVFK,VSGGPSLEQR                                                                                                                                                                                                                             |
| IPI00115580.4 | Q99JX4   | Eif3m  | Eukaryotic translation initiation factor 3 subunit M              |                                                                                                                                                               | FLEGELIHDLLTIFVSAK,EISFDTM<br>QQELQIGADDVEAFVIDAVR,ALK<br>DPNAFLFDHLLTLKPVK                                                                                                                                                                                                                                           | FLEGELIHDLLTIFVSAK,VAASCGAI<br>QYIPTELDQVR,ALKDPNAFLFDHLL<br>TLKPVK,DPNAFLFDHLLTLKPVK                                                                                                                                                                                        |
| IPI00118676.3 | P60843   | Eif4a1 | Eukaryotic initiation factor 4A-I                                 | GIYAYGFEEKPSAIQQR                                                                                                                                             | ELAQQIQK,GIYAYGFEEKPSAIQQ<br>R,GIDVQQVSLVINYLPTNR,RYL<br>SPK,GYDVIAQAQSGTGK,GVAIN<br>MVTEEDKR,VLITDILLAR,ATQAL<br>VLAPTR,ENYIHR,TATFAISILQQIE<br>LDLK,MFVLDEADEMLSR,LQMEA<br>PHIIVGTPGR,KVDWLTEK,KGVAI<br>NMVTEEDKR,KEELTLEGIR,LNSN<br>TQVVLLSATMPSDVLEVTK,GFKD<br>QIYDIFQK,VFDMLNR,DIETFYNTS<br>IEEMPLNVADLI,PSAIQQR | ELAQQIQK,GYDVIAQAQSGTGK,D<br>QIYDIFQK,VLITDILLAR,ATQAL<br>PTR,ENYIHR,TATFAISILQQIELDLK,<br>MFVLDEADEMLSR,LQMEAPHIIVGT<br>PGR,KVDWLTEK,KEELTLEGIR,LDT<br>LCDLYETLTITQAVIFINTR,GVAINM<br>VTEEDK,LNSNTQVVLLSATMPSDV<br>LEVTK,QFYINVER,VFDMLNR,DIET<br>FYNTSIEEMPLNVADLI,PSAIQQR |
| IPI00409918.1 | P10630-2 | Eif4a2 | Isoform 2 of Eukaryotic initiation factor 4A-II                   | GIYAYGFEEKPSAIQQR                                                                                                                                             | GIDVQQVSLVINYLPTNR,GIYAY<br>GFEEKPSAIQQR,ELAQQIQK,KGV<br>AINFVTEEDKR,RYLSPK,GYDVIA<br>QAQSGTGK,VLITDILLAR,ENYIH<br>R,MFVLDEADEMLSR,VFDMLNR,<br>KVDWLTEK,PSAIQQR                                                                                                                                                       | ELAQQIQK,GYDVIAQAQSGTGK,QF<br>YINVER,VLITDILLAR,KEELTLEGIK,<br>ENYIHR,MFVLDEADEMLSR,VILAL<br>GDYMGATCHACIGGTNVR,KVDWL<br>TEK,VFDMLNR,PSAIQQR,LQAEAP<br>HIVVGTGPR                                                                                                             |
| IPI00221581.1 | Q8BGD9   | Eif4b  | Eukaryotic translation initiation factor 4B                       | VDVADQAQDKDRDDR,PVSWADET<br>DLEGDVSTTWHSNDDVYR,SPPYTA<br>FLGNLPYDVTEDSIK,TISLTDFLAEDG<br>GTGGGSTYVPK                                                          | GFGYAEFEDLSLLSALSNEESL<br>GNR,SPPYTAFLGNLPYDVTEDSI<br>KDFFR,AASIFGGAKPVDTAAR                                                                                                                                                                                                                                          | GFGYAEFEDLSLLSALSNEESL<br>NR,VDVADQAQDK,VDVVGATQGG<br>AGSCSR,SPPYTAFLGNLPYDVTED<br>SIK,GLNISAVR,TISLTDFLAEDGGT<br>GGGSTYVPK                                                                                                                                                  |

|               |          |        |                                                                 |                                                                                              |                                                                                                                                                                    |                                                                                                                                                                                         |
|---------------|----------|--------|-----------------------------------------------------------------|----------------------------------------------------------------------------------------------|--------------------------------------------------------------------------------------------------------------------------------------------------------------------|-----------------------------------------------------------------------------------------------------------------------------------------------------------------------------------------|
| IPI00421179.1 | Q6NZJ6   | Eif4g1 | Isoform 1 of Eukaryotic translation initiation factor 4 gamma 1 |                                                                                              | GSSGGSGAKPSDTASEATRPATL NR,ELQALYALQALVVTLEQPANL LR,GVIDLIFEK,IHNAENIQPGEQK ,VPTTEKPTVTVNFR,IISSVIMTEDI K,ATSLLEILGLLCK,EAVGDLLDA FK,LKEELEEAR,ERPSQPEGLR          | GLPLVDDGGWNTVPISK,EITKPLRP MGK,LPGINCGPDFTPSFANLGR,IH NAENIQPGEQK,VPTTEKPTVTVNFR,ATSLLEILGLLCK,LGIESTLER,G GPGGELPR,ITKPGSIDSNNQLFAP GGR,PIPESEFSSSPLQVSTALVPHK ,EAVGDLLDAFK,ERPSQPEGLR |
| IPI00126006.6 | Q62448   | Eif4g2 | Isoform 1 of Eukaryotic translation initiation factor 4 gamma 2 |                                                                                              |                                                                                                                                                                    | GLSFLFPLLK,FDKLCLELLNVGVES KLILK,SQGLSQLYHNQSQGLLSQL QGQSK,FSASSGGGGR                                                                                                                   |
| IPI00124742.3 | Q9WUK2   | Eif4h  | Isoform Long of Eukaryotic translation initiation factor 4H     | TVATPLNQVANPNSAIFGGARPR,SLR VDIAEGRK,TVATPLNQVANPNSAIFG GAR,ELPTEPPYTAYVGNLFPNTVQGD IDAIFK   | GFCYVEFDEVDSLK,ELPTEPPYT AYVGNLFPNTVQGDIDAIFK                                                                                                                      | LQLKPR,ELPTEPPYTAYVGNLFPNT VQGDIDAIFK,TVATPLNQVANPNSA IFGGAR                                                                                                                            |
| IPI00108125.4 | P63242   | Eif5a  | Eukaryotic translation initiation factor 5A-1                   | RNDFQLIGIQDGYLSLLQDSGEVR,ND FQLIGIQDGYLSLLQDSGEVR,VHLVGI DIFTGK                              | LPEGDLGK,YDCGEEILITVLSAMT EEAVAIK,RNDFQLIGIQDGYLSL LQDSGEVR,NGFVVLK,EDLRLPE GDLGK,NDFQLIGIQDGYLSLLQD SGEVR,IVEMSTSK,KYEDICPSTH NMDVPNIK,VHLVGIDIFTGK,VHL VGIDIFTGK | LPEGDLGK,YDCGEEILITVLSAMTE EEAVAIK,NDFQLIGIQDGYLSLLQD SGEVR,IVEMSTSK,YEDICPSTHNM DVPNIK,KYEDICPSTHNMDVPNIK,V HLVGIDIFTGK                                                                |
| IPI00756424.3 | Q05D44   | Eif5b  | Isoform 1 of Eukaryotic translation initiation factor 5B        | HTHVQDGEAGGITQQIGATNVPLEAIN EQTK,ELEELSLEAQGIR,IVELK                                         |                                                                                                                                                                    | EGDTIIVPGVEGPIVTQIR,TLAGLPL LVAYK,ILPQYIFNSR,DAAAVKPTEN NEEESASK,ALPGMGTIDVILINGR, HIAVFPCK,TFVSLVPTSHTGDGM GSLIYLLVELTQTMLSKR                                                          |
| IPI00115862.1 | O55135   | Eif6   | Eukaryotic translation initiation factor 6                      |                                                                                              | LSALGNVTTCDNDYVALVHPDLDR ETEEILADV LK,NSLPDSVQIR                                                                                                                   | TSIEDQDELSSLLQVPLVAGTVNR,L SALGNVTTCDNDYVALVHPDLDR                                                                                                                                      |
| IPI00400401.1 | Q80Y81   | Elac2  | Isoform 1 of Zinc phosphodiesterase ELAC protein 2              | ELGLPVGTAAPAAVAVK,ALFAGDIEE MVER                                                             |                                                                                                                                                                    | VCFGDFPTVPK,LISLLETCDLEEF QTCLVR,YQLRPK,ELGLPVGTAAP AIIAAVK,IQTQLSLIHPDIFPQLTSFY SK                                                                                                     |
| IPI00466032.3 | Q78QY3   | Elav1  | ELAV (embryonic lethal, abnormal vision, Drosophila)-like 1     | PSSEVIK,FAANPNQNK,TNLIVNYLPQ NMTQEELR,SLFSSIGEVESAK,ILQVS FK,FGGPVHHQAQR                     | FAANPNQNK,VLVDQTTGLSR,IL QVSFK,FGGPVHHQAQR                                                                                                                         | RSEAEAEITSFNGHK,FAANPNQNK, SLFSSIGEVESAK,VLVDQTTGLSR,I LQVSFK,FGGPVHHQAQR                                                                                                               |
| IPI00123165.5 | Q3UKU1   | EII2   | RNA polymerase II elongation factor ELL2                        | DKNSLGAILQQVANLNPK,NSLGAILQ QVANLNPK                                                         |                                                                                                                                                                    |                                                                                                                                                                                         |
| IPI00224682.2 | Q9CZX0-2 | Elp3   | Isoform 2 of Elongator complex protein 3                        | DIEQFIEFFENPAFRPDGLK,FQHQQF GMLLMEEAER,VVTHMMPDLPNVGLE R,LEIGVQSVYEDVAR,DVDLNKMKTK, YGLASQPR |                                                                                                                                                                    |                                                                                                                                                                                         |
| IPI00114401.1 | O08579   | Emd    | Emerin                                                          | DDIFSSLEEEGKDR,LIYGQDSAYQSIA HYR,DYNDYYEESYLTTK                                              |                                                                                                                                                                    |                                                                                                                                                                                         |
| IPI00127554.1 | O35130   | Emg1   | Probable ribosome biogenesis protein NEP1                       |                                                                                              | VTTAFEEVWGVI,LIVVLEGASLET VK,AGLLQVYIHTQK                                                                                                                          |                                                                                                                                                                                         |

|               |        |           |                                                                        |                                                                                                       |                                                                                                                                                                                                                                                                                                                                                                           |                                                                                                             |
|---------------|--------|-----------|------------------------------------------------------------------------|-------------------------------------------------------------------------------------------------------|---------------------------------------------------------------------------------------------------------------------------------------------------------------------------------------------------------------------------------------------------------------------------------------------------------------------------------------------------------------------------|-------------------------------------------------------------------------------------------------------------|
| IPI00621842.6 |        | Enah      | enabled homolog isoform 1                                              | VEDGSFPGGGNTGSVSLASSK,STPS<br>SQPSANGVQTEGLDYDR,QNSQLPAQ<br>VQNGPSQEELEIQR,QNSQLPAQVQN<br>GPSQEELEIQR | VHIYHHTGNNTFR,APSTSTPEPTR,<br>ELEIQR                                                                                                                                                                                                                                                                                                                                      |                                                                                                             |
| IPI00331704.7 | P17183 | Eno2      | Gamma-enolase                                                          | SGETEDTFIADLVVGLCTGQIK,HIAQL<br>AGNSDLILPVPAFNVINGGSHAGNK,A<br>AVPSGASTGIYEALER                       |                                                                                                                                                                                                                                                                                                                                                                           |                                                                                                             |
| IPI00228548.6 | P21550 | Eno3      | Beta-enolase                                                           | LAQSNWGWVMVSHR,SGETEDTFIAD<br>LVVGLCTGQIK,AAVPSGASTGIYEAL<br>LR,HIADLAGNPDLVLPVPAFNVINGGS<br>HAGNK    | SGETEDTFIADLVVGLCTGQIK,LA<br>QSNWGWVMVSHR,YDLDFK,VNQ<br>IGSVTESIQACK,FGANAILGVSLA<br>VCK,AAVPSGASTGIYEALER,EA<br>LELLK                                                                                                                                                                                                                                                    | SGETEDTFIADLVVGLCTGQIK,LAQ<br>SNWGWVMVSHR,YDLDFK,VNQIGS<br>VTESIQAACK,FGANAILGVSLAVCK,A<br>AVPSGASTGIYEALER |
| IPI00458003.1 | Q6DYE8 | Enpp3     | Ectonucleotide<br>pyrophosphatase/phosphodiesterase<br>family member 3 |                                                                                                       | PTNIESCSENK,LNLSEGEVAATVK,<br>LETALCSCADDCLQR                                                                                                                                                                                                                                                                                                                             |                                                                                                             |
| IPI00310578.3 | Q9JIX0 | Eny2      | Enhancer of yellow 2 transcription factor<br>homolog                   | ALVPDSVK,GLEHVTVDLVAEITPK                                                                             | ALVPDSVK,TFLAQHASL,GLEHVT<br>VDDLVAEITPK                                                                                                                                                                                                                                                                                                                                  |                                                                                                             |
| IPI00309481.1 | O70318 | Epb4.112  | Band 4.1-like protein 2                                                | QAGASVLPVETEAQEHVVAQK,ETKE<br>VQTSELKAEVASQK                                                          |                                                                                                                                                                                                                                                                                                                                                                           |                                                                                                             |
| IPI00849631.1 |        | Epb4.114b | erythrocyte protein band 4.1-like 4b                                   |                                                                                                       | EPCPGGTLTLLSEQSEVAGNVWSGH<br>ACCQGKR,VQGKEPCPGGTLTLLSEQ<br>SEVAGNVWSGHACCQGKR                                                                                                                                                                                                                                                                                             |                                                                                                             |
| IPI00320459.2 | Q8R0W0 | Eppk1     | Epiplakin                                                              |                                                                                                       | GFFDPNTHENLTYLQLLER,REEL<br>LAQHLAGK,IPVFQAMK,YQAGGL<br>TVHDVTTLTSLAR,LSVEEAVA<br>AGVVGGEIQEK,LLEAQIATGGVID<br>PVHSHR,VPGIHGDVTAELFNSG<br>ILNK,GFFDPNTHENLTYLQLLER                                                                                                                                                                                                        |                                                                                                             |
| IPI00339916.9 | Q8CGC7 | Eprs      | Bifunctional aminoacyl-tRNA synthetase                                 | DSKHEELMLGDPCLDKL,TGQEYKP<br>GNPSAAAVQTVSTK,QYINKDSKHEEL<br>MLGDPCLK                                  | SQSGSLSSGGAGEGQGPK,DQV<br>DSAVQELLQLK,VIDPVAPR,VAVQ<br>GDVVR,SSSNTVESTSLYNK,VSE<br>TVAFTDVNSILR,VTEAVECLLSLK<br>,LNQWCNVVR,GDVSISVEEGKEN<br>LLR,FAGGDYTTTIEAFISASGR,VL<br>EDIQLNLFTR,VAAQGEVVR,YNV<br>YPTYDFACPIVDSIEGVTHALR,AA<br>LLNQHYQVNFK,KEENLAEWYSQ<br>VITK,LNLNNTVLSK,FYTLFGR,TG<br>QEYKPGNPSAAAVQTVSTK,AIQ<br>GATSHHLGQNFSSK,VACQGEVVR<br>,VYEELLAIPVVR,SCQFVAVR |                                                                                                             |

|               |        |        |                                                                          |                                                                                                                                                                                                                                                                                                    |                                                                                                                |
|---------------|--------|--------|--------------------------------------------------------------------------|----------------------------------------------------------------------------------------------------------------------------------------------------------------------------------------------------------------------------------------------------------------------------------------------------|----------------------------------------------------------------------------------------------------------------|
| IPI00890139.1 | Q3UIS9 | Eps151 | epidermal growth factor receptor pathway substrate 15, related isoform a | ALLFSNNSQELHPDPFQAEDPFK,LDP<br>FESSDPFSSSSISSK,TDLDLGYYVSG<br>QEVK,TSEVQELQNDLDRETSSLQELE<br>AQK,GTPIPDSSSTLASGEFTGVK,FDG<br>IFESLLPVNGLLSGDK,ELDDISQEIAQL<br>QR                                                                                                                                   |                                                                                                                |
| IPI00460558.3 | Q6PH08 | Erc2   | Isoform 1 of ERC protein 2                                               |                                                                                                                                                                                                                                                                                                    | KEECNK,KIAELESLTR                                                                                              |
| IPI00221540.1 | Q8BFZ9 | Erlin2 | Erlin-2                                                                  |                                                                                                                                                                                                                                                                                                    | LLIAAQK,PNIPEAIRR,GGALLTSTS<br>GPGFHLMLPFITSYK                                                                 |
| IPI00118832.1 | P57759 | Erp29  | Endoplasmic reticulum protein ERp29                                      | SLNILTAFR,ESYPVFYLFRLAENSASS<br>EELLVAEVGISDYGDGK,WASQYLKIMG<br>KILDQGEDFPASEMAR,GALPLDVTVF<br>YK                                                                                                                                                                                                  |                                                                                                                |
| IPI00109142.4 | Q9R0P3 | Esd    | S-formylglutathione hydrolase                                            |                                                                                                                                                                                                                                                                                                    | SVSAFAPICNPVLCSWGK,SGYQQA<br>ASEHGLVVIAPDTSPPR,KIPVVFR,VF<br>EHSSVELK                                          |
| IPI00128450.1 | Q3U7R1 | Esy1   | Isoform 1 of Extended synaptotagmin-1                                    |                                                                                                                                                                                                                                                                                                    | LLAETVAPAVR,LLVPLVPLDQDVAQ<br>LR                                                                               |
| IPI00312468.5 | Q8BWW3 | Etf1   | Eukaryotic peptide chain release factor subunit 1                        | FTVDLPK,YVLHCQGTEEEK,LVDI<br>SYGGENGFNQAIELSTEVLSNVK,<br>FGATLEIVTDK,VNVAGLVLAGSA<br>DFK,LSVLGAITSVQQR,FGFIVIDG<br>SGALFGTLQGNTR                                                                                                                                                                   | GFGGIGGILR,YVLHCQGTEEEK,FH<br>TEALTALLSDDSK,SQEGSQFVK,LS                                                       |
| IPI00116753.4 | Q99LC5 | Etf1   | Electron transfer flavoprotein subunit alpha, mitochondrial              | DPEAPIFQVADYGVADLDFK,RAA<br>SLLR,GLLPEELTPLILETQK,TIVAI<br>NKDPEAPIFQVADYGVADLDFK                                                                                                                                                                                                                  | VLVAQHDAYK,LLYDLADQLHAAVG<br>ASR,IVAPELYIAGVISGAIQHLGAMK<br>,LNVAPVSDIIEIK,LGGEVSVCLVAGT<br>K,GLLPEELTPLILETQK |
| IPI00411164.4 |        | Etf4   | enhancer trap locus 4                                                    | VVTLKDVEDGAFLLR,DCGASLPHMA<br>QEVSPRLLVLDEVPPAPEPPTSISPA<br>SRK,SSSLPSASGDSSNLPNAPATK,G<br>TDASQAAQYVAMEK,TQDQDVPVTGY<br>GQVVLR,SLGVLYLQYGDETQ,TAVQV<br>LSSGEVHDIVSQK,DVEDGAFLLR,SMT<br>DVL TMLR,QGFAYSTTTIPK,VSFSSSG<br>LNSLEGEINK,SIPNLEMPASSPVSK,<br>GDAAGDKLELSESPNSEQELDK,KP<br>VIII FDEPMDIR |                                                                                                                |
| IPI00467271.2 | Q8K1G2 | Evc2   | Limbin                                                                   |                                                                                                                                                                                                                                                                                                    | KMAAAFK,QVSAILR,SACVQILESH<br>R                                                                                |
| IPI00122831.5 | Q3U9D6 | Exoc6  | exocyst complex component 6                                              | STNLLLTRILSSCLLNLR,EVIIQTEDIIR<br>CRIQQR                                                                                                                                                                                                                                                           |                                                                                                                |
| IPI00468525.4 | Q61188 | Ezh2   | Isoform ENX-1A of Histone-lysine N-methyltransferase EZH2                | IFEAISSMFPDK,QPCDSSCPCVIAQNF<br>CEK,NTETALDNKPCGPGQCYQHLEGA<br>K                                                                                                                                                                                                                                   |                                                                                                                |

|               |        |               |                                              |                                                                                          |                                                                                                                                                                                  |
|---------------|--------|---------------|----------------------------------------------|------------------------------------------------------------------------------------------|----------------------------------------------------------------------------------------------------------------------------------------------------------------------------------|
| IPI00387253.3 | Q8C263 | F630043A04Rik | Spindle and kinetochore-associated protein 3 | TDLVSIIDYPLSKPNSSSTDLEIK,VTAIP<br>EDILQMITK,YIISQVPANPPQTAASLK,<br>YIISQVPANPPQTAASLKEER |                                                                                                                                                                                  |
| IPI00230124.5 | P11404 | Fabp3         | Fatty acid-binding protein, heart            |                                                                                          | LILTLTHGSVVSTR,SLGVGFATR<br>LILTLTHGSVVSTR,SLGVGFATR,PT<br>TIIEK                                                                                                                 |
| IPI00108791.1 | P54731 | Faf1          | FAS-associated factor 1                      |                                                                                          | LQIVFDFVASK,SLLEVNLFPPQETL<br>FLQAK                                                                                                                                              |
| IPI00109611.1 | Q9D6U8 | Fam162a       | UPF0389 protein FAM162A                      |                                                                                          | ILLWSGR,RHESLTSNLER                                                                                                                                                              |
| IPI00808550.1 | Q5XG69 | Fam169a       | UPF0611 protein FAM169A                      | SQSEEQSEASSEHLEQFTQSAEK,FQ<br>DSEFSSSQGEDENVAK,TLLGSSDNV<br>ATVSNIEK                     | VVLYVLNR,DLGLHMLEDFVDSFT<br>EDALGLR<br>TLLGSSDNVATVSNIEK,KGEAVGFY<br>SVK                                                                                                         |
| IPI00331260.1 | Q91WE2 | Fam192a       | NEFA-interacting nuclear protein NIP30       | GLDEDETNFLDEVSR,MDGEDDSNLVI<br>K                                                         |                                                                                                                                                                                  |
| IPI00122015.1 | Q921M7 | Fam49b        | Protein FAM49B                               |                                                                                          | AWGAVVPLVGK,DQPPNSVEGLLN<br>ALR                                                                                                                                                  |
| IPI00322922.4 | Q9WV03 | Fam50a        | Protein FAM50A                               | EDLIIPHHHSFYDFIVTK,FSAHYDAVEA<br>ELK,SGPLFNFDVHDDVR,SSTVGLVTL<br>NDMK                    |                                                                                                                                                                                  |
| IPI00172255.1 | Q9WTJ8 | Fam50b        | Protein FAM50B                               | FSAHYDAVEAELK,ISNLSFTLDEEEGD<br>QEDSR,SSTVGLVTLNDMK                                      |                                                                                                                                                                                  |
| IPI00109033.3 | Q9CWE0 | Fam54b        | Isoform 1 of Protein FAM54B                  | ASSFADMMGILK,EEDPAVLISEVLR,S<br>LLKEEDPAVLISEVLR                                         |                                                                                                                                                                                  |
| IPI00227516.4 | Q148V8 | Fam83h        | Protein FAM83H                               | SSLIFASQAEGAVGTAAATTEK,HPGA<br>ASLTAAQLLDTLGGTDR,ILFAQSEPLV<br>PSAGALAR                  |                                                                                                                                                                                  |
| IPI00263874.3 | Q8C0C7 | Farsa         | Phenylalanyl-tRNA synthetase alpha chain     |                                                                                          | SIPLEGLVQSELMHLPSPGK,LEVAD<br>GGLSAELATQLGVEHQAVGVAVK                                                                                                                            |
| IPI00322828.1 | Q9WUA2 | Farsb         | Phenylalanyl-tRNA synthetase beta chain      |                                                                                          | VRPFAVAVLR,YDLLCLEGLAR,T<br>PGFEIHHGLLDR,LVITEETAK,ALV<br>AIGTHDLDTLSGPFITYTAK,LFEIS<br>DVVVK,LGVLHPDVITK,DLLFQAL<br>GR,AQGASDVVLYK<br>TAEFQVAR,LHQNICR,LGVLHPDVIT<br>K,TLLPGLLK |

|               |        |        |                                          |                                                                                                                                                                                                                                                                                                                                                                                                                                                                                                                                                                                                                                                                                                                                                                                                                                                                                                                                                                                                                                                                                                                                                                                                                                                                |                                                                                                                                                                                                                                                                                                                                                                                                                                                                                                                             |
|---------------|--------|--------|------------------------------------------|----------------------------------------------------------------------------------------------------------------------------------------------------------------------------------------------------------------------------------------------------------------------------------------------------------------------------------------------------------------------------------------------------------------------------------------------------------------------------------------------------------------------------------------------------------------------------------------------------------------------------------------------------------------------------------------------------------------------------------------------------------------------------------------------------------------------------------------------------------------------------------------------------------------------------------------------------------------------------------------------------------------------------------------------------------------------------------------------------------------------------------------------------------------------------------------------------------------------------------------------------------------|-----------------------------------------------------------------------------------------------------------------------------------------------------------------------------------------------------------------------------------------------------------------------------------------------------------------------------------------------------------------------------------------------------------------------------------------------------------------------------------------------------------------------------|
| IPI00113223.2 | P19096 | Fasn   | Fatty acid synthase                      | <p>VAASVDLITK,AGLYGLPK,LSVPT<br/> YGLQCTQAAPLDSIPNLAAYIDCI<br/> K,NVTFHGILLDALFEEANDSWR,F<br/> DASFFGVHPK,PLFLVHPIEGSTT<br/> VFHSLAAK,EEEEPEAVLPGAQPTL<br/> ISAISK,VLEALLPLK,LPESENLQE<br/> FWANLIGGVDMVTDDDDRR,LLAA<br/> ACQLQLNGNLQLELGEALAQER,<br/> FPQLDDTSFANSR,LDPGSPELQ<br/> QVLK,LGPVGGVFNLAMVLR,VSD<br/> LLLSTDER,ALHLVGLK,SLGLSLE<br/> ETPVVFENVSFHQATILPK,LLEAS<br/> HAFEVSDTGNIIVSGK,SYIITGGL<br/> GGFGL ELAR,DGVVKPLK,LTQGE<br/> VYK,TGTVALEVR,GTNTGVVWG<br/> VSGSEASEALSR,VTAIYIDPATHR<br/> ,ELSF AAVSFYHK,EAVLAAYWR,G<br/> PSIALDTACSSLLALQNAQAIR,<br/> DNLEFFLTNLGK,ALIAEATK,LQV<br/> VDRPLPVR,TLEAVQDILLEQGR,L<br/> FDHPEVPTPPESASVSR,VYLWE<br/> DPNSK,VFTTVGSAEK,DHKDNLE<br/> FFLTNLGK,GETVLIHSGSGGVGQ<br/> AAISIALSLGCR,AAMLGQEDPPQ<br/> HGLPR,VYATILNAGTNTDGSK,G<br/> GNVGINSFGFGGSNVHVILQPNT<br/> R,EQTAHAFVNVLTR,ISSCMEVL<br/> DLFLNQPHAVLSSFVLAEK,VAEV<br/> LAGEGHLYSR,RVYATILNAGTNT<br/> DGSK,TGGLAFHSYFMEGIAPTLL<br/> QALK,RQQEQLVPTLEK,SEAVVA<br/> VLLTK,AIPQEKPIFLSVEDTSFQW<br/> VDSLK,LSFFDFK,AVAHILGIR,H<br/> FQLEQDKPK,EGGFLLVHTVLK,A<br/> QVEDAFR,SLCAFR,LLLPEDPLIS<br/> GLLNSQALK,VIFPGTYLCLVWK,<br/> DGAWGAFR,LSPDAIPGK,DTSFE<br/> QHVLLHTGGK,GYTVLGV EGR,SF<br/> YGTALFLCR,ACVDTALENLSTLK,<br/> GVDI VLNLAFFK VLSL EHGVM</p> | <p>WLSTSIPEAQWQSSLAR,LLLPEDP<br/> LISGLLNSQALK,LDPGSPELQQVLK<br/> ,LGPVGGVFNLAMVLR,YHGNVTLL<br/> R,CILLSNLSNTSHAPK,ALHLVGLK,I<br/> SSCMEVLDLFLNQPHAVLSSFVLAE<br/> KK,ACVDTALENLSTLK,SGECAAL<br/> VGGINLLKPNQSVQFMK,LSVPTYG<br/> LQCTQAAPLDSIPNLAAYIDCIK,LT<br/> QGEVYK,EEEEPEAVLPGAQPTLISAI<br/> SK,SDEAVKPLGVK,VLEALLPLK,TL<br/> LESGLESINIHSLSAEPR,GHALG<br/> ETLACLPSEVQPAPSLLSQEEWESL<br/> FSR,VSVHIIEGDHR,LQVVDRLPV<br/> R,AVAHILGIR,HFQLEQDKPK,VHLT<br/> GINVNPNALFPPVEFPAPR,LFDHPE<br/> VTPPPESASVSR,VQEVQQVSTNK</p> |
| IPI00114860.4 | Q71FD7 | Fblim1 | Filamin-binding LIM protein 1            | <p>SLISDLEQLHLPPPPPPPPQAPSK,VA<br/> SSVFITLAPRR,ARPWEMLPTK,FAPV<br/> CSICENPIIPR,PSEEELPPPPEPVTLF<br/> ER,DGRPLCEPCYQDTLEK</p>                                                                                                                                                                                                                                                                                                                                                                                                                                                                                                                                                                                                                                                                                                                                                                                                                                                                                                                                                                                                                                                                                                                                 | <p>SLISDLEQLHLPPPPPPPPQAPSK,<br/> FAPVCSICENPIIPR</p>                                                                                                                                                                                                                                                                                                                                                                                                                                                                       |
| IPI00420711.1 | Q6PB97 | Fbxl19 | Isoform 1 of F-box/LRR-repeat protein 19 |                                                                                                                                                                                                                                                                                                                                                                                                                                                                                                                                                                                                                                                                                                                                                                                                                                                                                                                                                                                                                                                                                                                                                                                                                                                                | <p>ELCVCMR,GADPGSPGLLPPR</p>                                                                                                                                                                                                                                                                                                                                                                                                                                                                                                |
| IPI00624157.2 |        | Fcgbp  | Fc fragment of IgG binding protein       |                                                                                                                                                                                                                                                                                                                                                                                                                                                                                                                                                                                                                                                                                                                                                                                                                                                                                                                                                                                                                                                                                                                                                                                                                                                                | <p>GCVLDVCLGGGSK,ISVINGGSK</p>                                                                                                                                                                                                                                                                                                                                                                                                                                                                                              |
| IPI00120457.1 | Q920E5 | Fdps   | Farnesyl pyrophosphate synthetase        | <p>ELGHPEIGDAIAR,VGTDIQDNK,G<br/> LTVVQAFQELVEPK</p>                                                                                                                                                                                                                                                                                                                                                                                                                                                                                                                                                                                                                                                                                                                                                                                                                                                                                                                                                                                                                                                                                                                                                                                                           | <p>VGTDIQDNK,GLTVVQAFQELVEPK,<br/> RGQICWYQK</p>                                                                                                                                                                                                                                                                                                                                                                                                                                                                            |
| IPI00410836.1 | Q8C5X6 | Fen1   | Putative uncharacterized protein         | <p>QLQQAQEAGMEEVEK,EAQQLFLEP<br/> EVLDPESVELK,FMCGEKQFSEER</p>                                                                                                                                                                                                                                                                                                                                                                                                                                                                                                                                                                                                                                                                                                                                                                                                                                                                                                                                                                                                                                                                                                                                                                                                 |                                                                                                                                                                                                                                                                                                                                                                                                                                                                                                                             |

|               |        |        |                                                            |                                                                                                                                                                                                                                                                                                                                                                                                                                                                                             |                                                                                                                                                                                                                                                                                                                                                                                                                                       |
|---------------|--------|--------|------------------------------------------------------------|---------------------------------------------------------------------------------------------------------------------------------------------------------------------------------------------------------------------------------------------------------------------------------------------------------------------------------------------------------------------------------------------------------------------------------------------------------------------------------------------|---------------------------------------------------------------------------------------------------------------------------------------------------------------------------------------------------------------------------------------------------------------------------------------------------------------------------------------------------------------------------------------------------------------------------------------|
| IPI00276222.1 | Q8CIB5 | Fermt2 | Fermitin family homolog 2                                  |                                                                                                                                                                                                                                                                                                                                                                                                                                                                                             | PQALLDK,TSTILGDITSIPELADYIK                                                                                                                                                                                                                                                                                                                                                                                                           |
| IPI00129928.2 | P97807 | Fh1    | Isoform Mitochondrial of Fumarate hydratase, mitochondrial |                                                                                                                                                                                                                                                                                                                                                                                                                                                                                             | VAALTGLPFVTAPNK,ETAIELGYLT<br>AEQFDEWVKPK,NVLHSAR,VLLPG<br>LQK,MPIPVIAFGILK                                                                                                                                                                                                                                                                                                                                                           |
| IPI00331030.3 | Q8BPY9 | Fign1  | Fidgetin-like protein 1                                    | TSTGLNMFLSNLSCVPSGCENPQER,<br>GILLFGPPGTGK                                                                                                                                                                                                                                                                                                                                                                                                                                                  |                                                                                                                                                                                                                                                                                                                                                                                                                                       |
| IPI00467002.4 | Q9WTJ4 | Fiz1   | Fit3-interacting zinc finger protein 1                     | DFNAPALLER,GFITLSNLSR                                                                                                                                                                                                                                                                                                                                                                                                                                                                       |                                                                                                                                                                                                                                                                                                                                                                                                                                       |
| IPI00126000.1 | Q62446 | Fkbp3  | FK506-binding protein 3                                    | SEQLPK,LEIEPEWAYGK,LSDDKPK,N<br>AKPLSFK,LLGNIK,IPPNTK,ARLEIEPE<br>WAYGK,FKGTETISK,FLQDHGSDSFLA<br>EHK                                                                                                                                                                                                                                                                                                                                                                                       |                                                                                                                                                                                                                                                                                                                                                                                                                                       |
| IPI00230139.5 | P30416 | Fkbp4  | FK506-binding protein 4                                    | RGEAHLAVNDFDLAR,GEHSIVYLKPS<br>YAFGSVGK,IPPNATLVFEVELFEFK,V<br>FVHYTGWLLDGTKFDSSLDRK,VFVHY<br>TGWLLDGTK,IPPNATLVFEVELFEFKG<br>EDL TEEEDGGIIR,GEGYARPNDGAMV<br>EVALEGYHKDR,VFVHYTGWLLDGTK<br>FDSSLDR,IVSWLEYESSFSGEEMQK,<br>PNDGAMVEVALEGYHK,DKFSFDLGK<br>GEVIK,GEAHLAVNDFDLAR,AKESWE<br>MSSAEKLEQSNIVK,VGEVCHITCKPE<br>YAYGAAGSPPK,GEDL TEEEDGGIIR,A<br>AENGAQSAPLPLEGVDISP,K,ESWEM<br>SSAEKLEQSNIVK,AAENGAQSAPLPL<br>EGVDISPQDEGVK,GEGYARPNDG<br>AMVEVALEGYHK,TRGEGYARPNDGA<br>MVEVALEGYHK | RGEAHLAVNDFDLAR,AEVAAGD<br>HPTDAEMK,GEHSIVYLKPSYAFG<br>SVGK,AWDIAVATMK,DKFSFDLG<br>K,FQIPPHAELR,VFVHYTGWLLD<br>FDSSLDR,TQLAVCQQR,VGEVCHIT<br>GTK,LEQSNIVK,VLQLYPSNK,VK<br>CKPEYAYGAAGSPPK,FSFDLGK,A<br>AEVAAGDHPTDAEMKGER,VKAE<br>AENGAQSAPLPLEGVDISP,K,FQIPP<br>VAAGDHPTDAEMK,LQAFSAIES<br>HAELR,LEQSNIVK,LASHLNLAMCH<br>CNK,TQLAVCQQR,VGEVCHITCK<br>LK<br>PEYAYGAAGSPPK,GEDL TEEED<br>GGIIR,AAENGAQSAPLPLEGVDIS<br>PK,LASHLNLAMCHLK |
| IPI00406870.3 | Q2VIS4 | Flg2   | Filaggrin-2                                                | QLYTCNESIDSYHLSSDSNNR,NPDDP<br>DTVDVIMHMLDR                                                                                                                                                                                                                                                                                                                                                                                                                                                 |                                                                                                                                                                                                                                                                                                                                                                                                                                       |



IPI00131138.10 Q8BTM8 Flna

Isoform 1 of Filamin-A

LIALLEVLSQK,GAGTGGLGLAVEGPS  
EAK,SAGQGEVLVYVEDPAGHQEEAK,  
FGGEHVPNSPFQVTALAGDQPTVQTP  
LR,IANLQTDLSDGLR,NGQHVASSPIP  
VVISQSEIGDASR

YIPVQQGPVGVNVTYGGDHIPK,V  
QVQDNEGCSVEATVK,LDVQFSG  
LAK,SPFSVGVSPSLDLSK,VGSA  
ADIPINISSETDLSLLTATVVPPSGR,  
AFGPGLQGGNAGSPAR,ALTQTG  
GPHVK,VTAQQGGLEPSGNIANK,  
AWGPGLQGGNAGSPAR,ALTQTG  
YVEDPAGHQEEAK,VHGPPIQSG  
TTNKPKNK,DKGEYTLVVK,EEGPY  
EVEVYDGVVPGSPFPLEAVAP  
TKPSK,VATVPQHATSGPGPADV  
SK,YWPQEAAGEYAVHVCNSED  
R,KGEITGEVR,GIEPTGNMVK,FG  
GEHVPNSPFQVTALAGDQPTVQ  
TPLR,YGGQPVNPFPSK,SPFEVY  
VDK,AEFTVETR,DAGEGGLSLAIE  
GPSK,TFSVWYVPEVTGTHK,LI  
ALLEVLSQK,LQVEPAVDTSGVQCY  
GPGIEGQGVFR,TTYFEIFTAGAG  
MGEVEVVIQDPTGQK,VKVEPSH  
DASK,TGAVNKPAAFTVDAK,IQ  
QNTFTR,IVSPSGAAVPCK,NGHV  
GISFVPK,LTVSSLQESGLK,IANL  
QTDLSDGLR,KIQQNTFTR,GAGT  
GGLGLAVEGPSEAK,TGVELGKP  
THFTVNAK,CSYQPTMEGVHTVH  
VTFAGVPIPR,GKLDVQFSGLAK,  
DAGEGLLAVQITDPEGKPK,VNVG  
AGSHPNK,SADFVVEAIGDDVGTL  
GFSVEGPSQAK,DVDIIDHHDNTY  
TVK,AGVAPLQVK,VHSPSGALEE  
CYVTEIDQDK,FTVETR,GTVEPQL  
EAR,GLVEPVDVVDNADGTQTVN  
YVPSR,VTVLFAGQHIK,VAQPSI  
TDNK,LLGWIQNK,VPVHDVTDAS  
K,LYSVSYLLK,LPQLPITNFSR,RL  
TVSSLQESGLK,AEISFEDR,ETGE  
HLVHVK,AEAGVPAEFGIWTR,VD  
VGKDQEFQVK,VEPGLGADNSVV  
R,IVSNHSI HFTSSVFVDSI TK A

YIPVQQGPVGVNVTYGGDHIPK,TG  
VAVNKPAAFTVDAK,VQVQDNEG  
CSVEATVK,ASGPGLNTTGVASL  
PVEFTIDAK,YNDQHIPGSPFTAR,  
SPFSVGVSPSLDLSK,IVSPSGAA  
VPCK,VGSAADIPINISSETDLSLL  
TATVVPPSGR,LTVSSLQESGLK,  
IANLQTDLSDGLR,YGGPYHIGGS  
PFK,AYVQKSNFTVDCSKAGNML  
LVGVHGPR,LKPGAPLRPK,GAGT  
GGLGLAVEGPSEAK,LLGWIQNK  
LPQLPITNFSR,AWGPGLQGGNAG  
SPAR,ALTQTGPHVK,VTAQQGLE  
PSGNIANK,AWGPGLQGGNAGSPAR,  
ALTQTGPHVK,VTAQQGGLEPSGNI  
ANK,AWGPGLQGGNAGSPAR,ALTQ  
TGPHVK,VTAQQGGLEPSGNIANK,  
AWGPGLQGGNAGSPAR,ALTQTG  
YVEDPAGHQEEAK,VHGPPIQSG  
TTNKPKNK,DKGEYTLVVK,EEGPY  
EVEVYDGVVPGSPFPLEAVAP  
TKPSK,VATVPQHATSGPGPADV  
SK,YWPQEAAGEYAVHVCNSED  
R,KGEITGEVR,GIEPTGNMVK,FG  
GEHVPNSPFQVTALAGDQPTVQ  
TPLR,YGGQPVNPFPSK,SPFEVY  
VDK,AEFTVETR,DAGEGGLSLAIE  
GPSK,TFSVWYVPEVTGTHK,LI  
ALLEVLSQK,LQVEPAVDTSGVQCY  
GPGIEGQGVFR,TTYFEIFTAGAG  
MGEVEVVIQDPTGQK,VKVEPSH  
DASK,TGAVNKPAAFTVDAK,IQ  
QNTFTR,IVSPSGAAVPCK,NGHV  
GISFVPK,LTVSSLQESGLK,IANL  
QTDLSDGLR,KIQQNTFTR,GAGT  
GGLGLAVEGPSEAK,TGVELGKP  
THFTVNAK,CSYQPTMEGVHTVH  
VTFAGVPIPR,GKLDVQFSGLAK,  
DAGEGLLAVQITDPEGKPK,VNVG  
AGSHPNK,SADFVVEAIGDDVGTL  
GFSVEGPSQAK,DVDIIDHHDNTY  
TVK,AGVAPLQVK,VHSPSGALEE  
CYVTEIDQDK,FTVETR,GTVEPQL  
EAR,GLVEPVDVVDNADGTQTVN  
YVPSR,VTVLFAGQHIK,VAQPSI  
TDNK,LLGWIQNK,VPVHDVTDAS  
K,LYSVSYLLK,LPQLPITNFSR,RL  
TVSSLQESGLK,AEISFEDR,ETGE  
HLVHVK,AEAGVPAEFGIWTR,VD  
VGKDQEFQVK,VEPGLGADNSVV  
R,IVSNHSI HFTSSVFVDSI TK A  
GGAHK

|               |        |      |                                                 |                                                                                                                                                                                                                                                                                                                                                                                                                                                                                                                                                                                                                                                                                                                                                                                                                                                                                                                                                                                                                                                                                                                     |                                                                                                                                                                                                                                                                                                                                                                                                                                                                                                                                                                                                                                                                                            |
|---------------|--------|------|-------------------------------------------------|---------------------------------------------------------------------------------------------------------------------------------------------------------------------------------------------------------------------------------------------------------------------------------------------------------------------------------------------------------------------------------------------------------------------------------------------------------------------------------------------------------------------------------------------------------------------------------------------------------------------------------------------------------------------------------------------------------------------------------------------------------------------------------------------------------------------------------------------------------------------------------------------------------------------------------------------------------------------------------------------------------------------------------------------------------------------------------------------------------------------|--------------------------------------------------------------------------------------------------------------------------------------------------------------------------------------------------------------------------------------------------------------------------------------------------------------------------------------------------------------------------------------------------------------------------------------------------------------------------------------------------------------------------------------------------------------------------------------------------------------------------------------------------------------------------------------------|
| IPI00663627.1 | Q80X90 | Flnb | Filamin-B                                       | <p>YGGPNHISR,PGTYVIYVR,VIVLFA<br/> GQHISK,DLDIIDNYDYSHTVK,HTI<br/> AVVWGGVNIPHSPYR,NSVELLV<br/> EDR,GAGIGGLGITVEGPSESK,S<br/> PFTVGVAAPLDLSK,VEPAIDTSGI<br/> K,APAVATVGSICDLNLK,VSFAGD<br/> AIPK,TGEEVGFVDDAK,SNVFTVV<br/> TR,GIEPTGNMVK,SADFVVESIGS<br/> EVGTLGFAIEGPSQAK,GFLDGVY<br/> SFEYYPSTPGK,LKPGAPLKP,K,G<br/> FHVVEVYDDVPIPNSPFK,YADE<br/> EIPR,LVSPGSANETSSILVESVTR<br/> ,PLTQVGGDHIK,LIALLEVLVSQK,V<br/> FGPGVER,LDVTILSPSR,LGSAAD<br/> FLLDISETDLSTLTASIK,FTVDTIS<br/> AGQGDVMVFVEDPEGNKEEAR,<br/> VYQQGLSEGR,AHGPGLGGLV<br/> GKPAEFTIDTK,LENVSVALEFLDH<br/> ESIK,AGLAPLEVR,VKAEGPGLSK<br/> ,VAVTEGCQPSR,IAGPGLSSCVR,<br/> IQQNTFTR,AFGPGIEGK,DAGYG<br/> GISLAVEGPSK,VNQPASFAIR,KI<br/> QQNTFTR,DAGEGLLAVQITDQE<br/> GKPQR,EATTDFTVDSRPLTQVG<br/> GDHIK,VLSDDEEDVDFDIHNAND<br/> TFTVK,VNIGQQGSHPPQK,EAGAGG<br/> LSIAVEGPSK,IGNLQTDLSGDLR,<br/> KGEITGTVHMPSGK,VHAQGPGL<br/> K,FADEHVPGSPFTVK,LLGWIQN<br/> K,VLFASQEIPASPFR,VEVGKDQ<br/> EFAIDTNGAGGQGK,YSVAVTWG<br/> GHHIPK,VVASGPGLEHGK,SPFE<br/> VNVDK,ANEPHFVTDCTEAGEG<br/> DVSVGK,VKVDPSHDASK,TATFT<br/> IVTEDAGEGLDLAIEGPSK,AAG<br/> SGELGVTVK</p> | <p>VAVTEGCQPSR,VGEPGILCVDCSE<br/> AGPGTLGLEAVSDSGAK,AWGPGL<br/> HGGIVGR,GAGIGGLGITVEGPSES<br/> K,SGCTINNPAAEFIVDPK,SPFTVGVA<br/> APLDLSK,GAGTGGLGLTVEGPCEA<br/> K,DGTCTVTYLPGLDYSILVK,GP<br/> GLETTGNIANKPTYFDIYTAGAGVG<br/> DIGIEVEDPQGK,APAVATVGSICDL<br/> NLK,VSFAGDAIPK,AGGPGLER,LP<br/> NNHIGISFIPR,VNIGQQGSHPPQK,IPYL<br/> PITNFNQNWQDGK,IGNLQTDLSG<br/> LR,KGEITGTVHMPSGK,LVSPGSAN<br/> ETSSILVESVTR,LLGWIQNK,PLTQV<br/> GGDHIK,AEVSIQNNK,VSFYFTVPG<br/> VYIVSTK,VLFASQEIPASPFR,GLVE<br/> PVNVVDNGDGTHTVYTPSQEGPY<br/> IVSVK,VTASGPGLSAYGVPASLPVE<br/> FAIDAR,GSHIPESPLQFYVNYPNNG<br/> SVSAYGPGLVYGVANK,VVASGPGL<br/> EHGK,AQITNPSGASTECFVK,PGAP<br/> LKPK,WCNEHLK,AAGSGELGVTVK</p> |
| IPI00664670.4 |        | FlnC | Isoform 1 of Filamin-C                          | <p>LIALLEVLVSQK,EAGAGGLSIAVEG<br/> PSK,IQQNTFTR,LENVSVALEFLE<br/> R,LLGWIQNK,LTVTSLQETGLK</p>                                                                                                                                                                                                                                                                                                                                                                                                                                                                                                                                                                                                                                                                                                                                                                                                                                                                                                                                                                                                                       | <p>CTYRPVMEGPHTVHVAFAGAPITR,<br/> SPFVVNVAPPLDLSK,HVTNSPFK,V<br/> PQLPITNFNR,WCNEHLK,HIGISFTP<br/> K,GAGGQQQLDVR,LLGWIQNK,RLT<br/> DLQR,GAGTGGLGLTVEGPCEAK,A<br/> PLQVAVLGPTGVAEPVEVR,GQHVP<br/> GSPFQFTVGPLGEGGAHK</p>                                                                                                                                                                                                                                                                                                                                                                                                                                                                    |
| IPI00124497.3 | P35969 | Flt1 | Vascular endothelial growth factor receptor 1   |                                                                                                                                                                                                                                                                                                                                                                                                                                                                                                                                                                                                                                                                                                                                                                                                                                                                                                                                                                                                                                                                                                                     | KTEVLVR,RGFIANATYK                                                                                                                                                                                                                                                                                                                                                                                                                                                                                                                                                                                                                                                                         |
| IPI00270737.5 | Q6AXB7 | Fmr1 | Fragile X mental retardation syndrome 1 homolog | SFLEFAEDVIQVPR,EDLMGLAIGTHGA<br>NIQQAR                                                                                                                                                                                                                                                                                                                                                                                                                                                                                                                                                                                                                                                                                                                                                                                                                                                                                                                                                                                                                                                                              | TADGSLQSASSEGSR,LQIDEQLR<br>,SFLEFAEDVIQVPR                                                                                                                                                                                                                                                                                                                                                                                                                                                                                                                                                                                                                                                |

|               |        |       |                                                                          |                                                                                                                                                                                              |                                                                                                                                                                             |                                                                               |
|---------------|--------|-------|--------------------------------------------------------------------------|----------------------------------------------------------------------------------------------------------------------------------------------------------------------------------------------|-----------------------------------------------------------------------------------------------------------------------------------------------------------------------------|-------------------------------------------------------------------------------|
| IPI00652813.1 | Q3UHL6 | Fn1   | Putative uncharacterized protein                                         |                                                                                                                                                                                              | YSFCTDHAVLVQTR,GVTYNIIVEA<br>LQNQR,LGVRPSQGGEAPR,EVT<br>SDSGSIVVSGLTPGVEYTYTIQVL<br>R,GLAFTDVDVDSIK,NLQPGSEY<br>TVTLVAVK,YIVNVYQISEEGK,VV<br>TPLSPPTNLHLEANPDTGVLTVS<br>WER |                                                                               |
| IPI00876259.1 |        | Fnbp1 | Formin binding protein 1                                                 | FEAWLAEVEGR,ADYSLILQR                                                                                                                                                                        |                                                                                                                                                                             |                                                                               |
| IPI00762582.3 |        | Foxp4 | Isoform 1 of Forkhead box protein P4                                     | RPGPPLGAPNPSTVGPPEDR,QQEQL<br>HLQLLTQQQAGK                                                                                                                                                   |                                                                                                                                                                             |                                                                               |
| IPI00114365.1 | P48760 | Fpgs  | Isoform Mitochondrial of<br>Folypolyglutamate synthase,<br>mitochondrial |                                                                                                                                                                                              | GGIFKPGVPAFTVVQPEGPLAVLR,<br>PVVCGVSSLGIDHTSLLGDTVEK                                                                                                                        |                                                                               |
| IPI00311968.1 | P97376 | Frg1  | Protein FRG1                                                             | MALLASNSCFIRCNEAGDIEAK,GAYIH<br>ALDNLGFTLGAPHR,YLGINS DGLVVG<br>R                                                                                                                            |                                                                                                                                                                             |                                                                               |
| IPI00353563.4 | Q61553 | Fscn1 | Fascin                                                                   | DVPWGVDSLITLAFQDQR,PEPATGFT<br>LEFR,NGQLAASVETAGDSELFLMK,LV<br>ARPEPATGFTLEFR,SSYDVFQLEFND<br>GAYNIK                                                                                         | DVPWGVDSLITLAFQDQR,KVTG<br>TLDANR,VGKDELFALEQSCAQV<br>VLQAANER,VTGTL DANR,FLVVA<br>HDDGR,LSCFAQSVSPA EK,LVAR<br>PEPATGFTLEFR,LINRPIIVFR                                     | GEHGFICR,WLQSEAGR,KVTGT<br>LDANR,VTGTL DANR,YAHL SAR,LIN<br>RPIIVFR,VNASASSLK |
| IPI00750014.4 |        | Fsip2 | PREDICTED: similar to fibrous sheath-<br>interacting protein 2           |                                                                                                                                                                                              | LEHFASGSVVNVGNLNDENKK,SSK<br>PNQTLPLYNTLLPYTFLEDMIR,VAS<br>LIVDGVSSVPSR,EFISDLK                                                                                             |                                                                               |
| IPI00762203.2 | P29391 | Ftl1  | Ferritin light chain 1                                                   | DDVALEGVGHFFR,ALFQDVQKPSQD<br>EWGK,ASYTYLSL GFFFDR,NLNQALL<br>DLHALGSAR,VAGPQAQTGAPQGS<br>GEYL FER,QNYSTEVEAAVNR,TQEAM<br>EAALAMEK                                                           | NLNQALLDLHALGSAR,LVNLHLR,M<br>GNHLTLNR                                                                                                                                      |                                                                               |
| IPI00625129.3 |        | Ftl2  | ferritin light chain 2                                                   | DDVALEGVGHFFR,ALFQDVQKPSQD<br>EWGK,ASYTYLSL GFFFDR,TQEAMEA<br>ALALEK,NLNQALLDLHALGSAR,QNYS<br>TEVEAAVNR,VAGPQAQTGAPQGS<br>GEYL FER                                                           | NLNQALLDLHALGSAR,LVNLHLR,M<br>GNHLTLNR                                                                                                                                      |                                                                               |
| IPI00119632.3 | Q9DBE9 | Ftsj3 | Putative rRNA methyltransferase 3                                        | ASEISIDDEELAQHPATTEDIR,AEGYA<br>EGDLTLYHR                                                                                                                                                    | FYHLAK,ILDPEGLALGAVIASSK,AL<br>LDLCAAPGGWLQVAAK                                                                                                                             |                                                                               |
| IPI00123292.5 | Q3UUU2 | Fubp1 | Putative uncharacterized protein                                         | IAQITGPPDR,SISQQSGAR,GRPAPGF<br>HHGDGPGNAVQEIMIPASK,IGGNEG<br>DVPIPR,IQFKPDDGTT PDR,VPDGMV<br>GFIIGR,RPLEDGDQPD AK,GQGNWNM<br>GPPGGLQEFNFIVPTGK,MGQAVPAP<br>AGAPPGGQPDYSAAWAEYYR,AGLVI<br>GK | IAQITGPPDR,IGGNEGIDVPIPR,I<br>QNDAGVR,VPDGMVGFIIGR,IQF<br>KPDDGTT PDR,LLDQIVEK,VVFG<br>DSVFLIMFSGI,RPLEDGDQPD AK,<br>FAVGIVIGR,IQIAPDSGGLPER                                | IGGNEGIDVPIPR,IQNDAGVR,MVMI<br>QDGPQNTGADKPLR,IQIAPDSGGL<br>PER               |

|               |        |       |                                                                      |                                                                                                                                                                                                  |                                                                                                                                                                                                                                            |                                                                                                                                                  |
|---------------|--------|-------|----------------------------------------------------------------------|--------------------------------------------------------------------------------------------------------------------------------------------------------------------------------------------------|--------------------------------------------------------------------------------------------------------------------------------------------------------------------------------------------------------------------------------------------|--------------------------------------------------------------------------------------------------------------------------------------------------|
| IPI00379513.6 | Q3TIX6 | Fubp3 | far upstream element (FUSE) binding protein 3                        | IDSIPHLNNSSTPLVDPSVYGYGVQK,IIN ELILTAQER,ALDDGVGNQLGALVHQR, NPGPFHNDMDGNSTIQELLIPASK                                                                                                             | EMVLEIIR,IQNDAGVR,FVVGIVGR,IINELILTAQER,ALDDGVGNQL GALVHQR,AGGGSIEVSVPR,IQF KPDDGISPER                                                                                                                                                     | IQIASESSGIPERPCVLTGTPESIEQ AK,IDSIPHLNNSSTPLVDPSVYGYGV QK,CQHAARIINELILTAQEREILGGL TVTR,IQNDAGVR,SINQQSGAHVEL QR,ALDDGVGNQLGALVHQR,AGG GSIEVSVPR |
| IPI00117063.1 | P56959 | Fus   | RNA-binding protein FUS                                              | EFGSNPIK,HDSEQDNSDNNTIFVQGL GENVTIESVADYFK,TGQPMINLYTDR, AADWFDGK,LKGEATVSFDDPPSAK                                                                                                               | APKPDGPGGGPGGSHMGGNYG DDR,LKGEATVSFDDPPSAK                                                                                                                                                                                                 | APKPDGPGGGPGGSHMGGNYGD DR,AAIDWFDGK,LKGEATVSFDDP PSAK,GEATVSFDDPPSAK                                                                             |
| IPI00122521.1 | Q61584 | Fxr1  | Isoform E of Fragile X mental retardation syndrome-related protein 1 | RGPNYTSGYGTNSELSNPSETESER,I FYHPETTQLMILSASEATVK,KEISEGD EVEVYSR,EDLMGLAIGTHGSNIQQAR, KVPGVTAIELDEDTGTFR,IFYHPETTQ LMILSASEATVKR,GFLEFVEDFIQVPR, EISEGDEVEVYSR,DPDSNPYSLLDNT ESDQTADTDASESHHSTNR | AINGPTSASGDEIPK,LQIDEQLR, DVHEDSLTVVFENNWQPER,ESI GNVQVLLLEYHAIYLK,RGPNYTSG YGTNSELSNPSETESER,LRPVN QNK,EISEGDEVEVYSR,VIQEIVD K,IFYHPETTQLMILSASEATVK,D VIEEHGPSEK,IYGESAEAVKK,IE GDNENKLPR,IYGESAEAVK,KVP GVTAIELDEDTGTFR,GFLEFVED FIQVPR |                                                                                                                                                  |
| IPI00126389.2 | Q6P5B5 | Fxr2  | Putative uncharacterized protein                                     | TVMDGGLES DGPNTENGLEDES RP QR,KVPGVTAIELGEETCTFR,EDLMGL AIGTHGANIQQAR,ENISNAQALLEYHL SYLQEVEQLR                                                                                                  | TKPSEDSL SGQK,LQIDEQLR,VIQ EIVDK,DVHEDSVTIFFENNWQSE R,LRPVNPSP LATAK,ENISNAQALL EYHLSYLQEVEQLR,AGYTTDESS SSSLHTR                                                                                                                           | VEVYSR,IYGETPEACR,AGYTTDES SSSLHTR                                                                                                               |
| IPI00130095.1 | P97855 | G3bp1 | Ras GTPase-activating protein-binding protein 1                      | DFFQNFNGNVVELR,RFMQTFVLAPEG SVANK,LPNFGFVVFDSEPVQK,FYV HNDIFR,FMQTFVLAPEGSVANK,NLPP SGAVPVTGTPPHVVK,TFSWASVTSK, NSSYAHGGLDSNGKPADAVYGQK,HP DSHQLFIGNLPHEVDK,STSPAPADVA PAQEDLR,QYYTLLNQAPDMLHR   | DFFQNFNGNVVELR,LPNFGFVVF DDSEPVQK,FYVHNDIFR,NLPPS GAVPVTGTPPHVVK,HPDSHQLFI GNLPHEVDKSELK,TFSWASVTS K,HPDSHQLFIGNLPHEVDK,STS PAPADVAPAQEDLR,EAGEPGDV EPR,SELKDFQNFNGNVVELR,FM QTFVLAPEGSVANK,NSSYAHGG LDSNGKPADAVYGQK,VLSNRPI MFR           | DFFQNFNGNVVELR,PESKPDSQIPP QRPQR,FYVHNDIFR,NLPPSGAVPV TGTPPHVVK,TFSWASVTSK,NSSY AHGGLDSNGKPADAVYGQK,VLSN RPIMFR,QYYTLLNQAPDMLHR                  |
| IPI00124245.1 | P97379 | G3bp2 | Isoform A of Ras GTPase-activating protein-binding protein 2         | YPDSHQLFVGNLPHDIDENELK,LPNF GFVVFDDSEPVQR                                                                                                                                                        | HLEEEEEK,NSSYVHGGVDASGK PQEAVYQNDIHHK,TEELKPQV EEK,VDAKPEVQSQPPR,LPNFGF VVFDSEPVQR                                                                                                                                                         | APEYLHR,VDAKPEVQSQPPR,NSS YVHGGVDASGK,VLSLNFSECHTK                                                                                               |
| IPI00111960.2 | P70699 | Gaa   | Lysosomal alpha-glucosidase                                          |                                                                                                                                                                                                  |                                                                                                                                                                                                                                            | KPLCSNSVVGACTLISLTTAVILGHL MLR,QLLWGPALLITPVLEPGK                                                                                                |
| IPI00406794.2 | Q9QYY0 | Gab1  | GRB2-associated-binding protein 1                                    | IFYLVADSEEDMNK,LTSVSGESSLYNL PR,QVEYLDLDDSGK                                                                                                                                                     |                                                                                                                                                                                                                                            |                                                                                                                                                  |
| IPI00265025.5 | Q9JIA6 | Galk1 | galactokinase 1                                                      |                                                                                                                                                                                                  | AEHSFAGVPCGIMDQLIALLGQK, GYALLIDCR,HVVSEIR                                                                                                                                                                                                 |                                                                                                                                                  |

|               |          |         |                                                        |                                                                                                           |                                                                                                                                                                                                                                                                                                                                                                                                                                                 |                                                                                                                                                                                                                                                                                                                                                                                       |
|---------------|----------|---------|--------------------------------------------------------|-----------------------------------------------------------------------------------------------------------|-------------------------------------------------------------------------------------------------------------------------------------------------------------------------------------------------------------------------------------------------------------------------------------------------------------------------------------------------------------------------------------------------------------------------------------------------|---------------------------------------------------------------------------------------------------------------------------------------------------------------------------------------------------------------------------------------------------------------------------------------------------------------------------------------------------------------------------------------|
| IPI00115679.1 | Q8BHN3-2 | Ganab   | Isoform 2 of Neutral alpha-glucosidase AB              |                                                                                                           | ERPFVLSR,ALLDTLQLGPDALT<br>HLIHEVTK,PAAVVLQTK,LSFQHD<br>PETSVLILR,VLLVLELQGLQK                                                                                                                                                                                                                                                                                                                                                                  | IILTAQPFR,LVAIVDPHIK,NHGLYVK,<br>HHGPOQLYLPVTLSSIPVFQR,PAAV<br>VLQTK,SIRPGLSPYR                                                                                                                                                                                                                                                                                                       |
| IPI00110931.1 | Q9CY66   | Gar1    | Isoform 1 of H/ACA ribonucleoprotein complex subunit 1 | VDEIFGQLR,VPYFNAPVYLENK,FQDQ<br>GPPER                                                                     |                                                                                                                                                                                                                                                                                                                                                                                                                                                 |                                                                                                                                                                                                                                                                                                                                                                                       |
| IPI00112555.3 | Q9CZD3   | Gars    | Glycyl-tRNA synthetase                                 | TLHVEEVVPSVIEPSFGLGR,LGDAVE<br>QGVINNSVLGYFIGR,LPFAAAQIGNSF<br>R                                          | KSEMESVLAQLDNYGQQELADLF<br>VNYNVK,TFFSFPVAVPAPFK,IYLY<br>LTK,DVKNGECFRADHLLK,SEME<br>SVLAQLDNYGQQELADLFVNYNV<br>K,FQSNVADLCLYLYSAK,GEFTIET<br>EGK,LPFAAAQIGNSF,SCYDLS<br>CHAR,APQVDVDR,TSYGWIEIVG<br>CADR,TLHVEEVVPSVIEPSFGLG<br>R,LGDAVEQGVINNSVLGYFIGR,T<br>VNVVQFEPNK                                                                                                                                                                        | TFFSFPVAVPAPFK,APQVDVDR,TLH<br>VEEVVPSVIEPSFGLGR,TVNVVQF<br>EPNK,NNIIQAWR,LPFAAAQIGNSF<br>R                                                                                                                                                                                                                                                                                           |
| IPI00230612.3 | Q3TGI3   | Gart    | phosphoribosylglycinamide formyltransferase            | VLTVTAVQENLMSALAEARK,VLTVTA<br>VQENLMSALAEAR                                                              | VLEFNCR,ITEGDAVIGVASSGLH<br>SNGFSLVR,RGDTVATLSER,KIQ<br>PLAK,LAQSPQVK,AFTNPEDACS<br>FITSANFPALVVK,SSSHIVLVISNK<br>,IELVVVGPEAPLAAGIVGDLTSAG<br>VR,AAGFKDPLLASGTDGVTGK,S<br>DLYEVMQSTLDGLLSASLPVWLE<br>NHSAVTVVMASK,SNFPVQQK,AF<br>AHITGGGLENIPR,VLTVTAVQEN<br>LMSALAEAR,PGCSVDLGGFAGL<br>FDLK,GVEITGFPEAQALGLQVFH<br>AGTALK,VAVLISGTGSNLQALIDS<br>TR,TFNCGIGAALVYSK,DQAEQV<br>LHDVR,VLVIGSGGR,IFPAALQLV<br>ASGAVQLR,AAVAGLDR,FGDPEC<br>QVILPLLK | ITEGDAVIGVASSGLHSNGFSLVR,R<br>GDTVATLSER,HEIPTAQWR,LAQSP<br>QVK,AFTNPEDACSFITSANFPALVV<br>K,IELVVVGPEAPLAAGIVGDLTSAG<br>VR,IAQLCNK,ISNAAVSVNDHSALA<br>QFCK,SNFPVQQK,AFAHITGGGELLE<br>NIPR,VLTVTAVQENLMSALAEAR,IY<br>SHSLLPIIR,AVAFQLR,GVEITGFPE<br>AQALGLQVFHAGTALK,ILSGPFVVR,<br>QVLVAPGNAGTACAGK,TFNCGIGA<br>ALVYSK,MLNIHPSLLPSFK,AAVAGL<br>DR,IFPAALQLVASGAVQLR,FGDPE<br>CQVILPLLK |
| IPI00625995.1 |          | Gatad2a | p66 alpha isoform a                                    | LQNAASATALVSR,IPGSIIPPLVR,TT<br>EAMGTGSGEGLLGDGPVDMR,EATAQ<br>KPTASSGSTVTTTPPLVR,TPLSTGGT<br>LAFVSPSLAVHK |                                                                                                                                                                                                                                                                                                                                                                                                                                                 |                                                                                                                                                                                                                                                                                                                                                                                       |
| IPI00128615.1 | Q8VHR5   | Gatad2b | Isoform 1 of Transcriptional repressor p66-beta        | VSSPLSPSAMSADAANSQAAAK,TPVV<br>QNAASIVQPSPAHVGGQGLSK,DLANL<br>EVPHELPTK,LPSRPGAQGIQNMNR                   |                                                                                                                                                                                                                                                                                                                                                                                                                                                 |                                                                                                                                                                                                                                                                                                                                                                                       |

|               |        |        |                                                                        |                                                                                                                                                                                                                                     |                                                                                                                                                                                                                                                                                                                                                                                                                       |                                                                                                                                                                            |
|---------------|--------|--------|------------------------------------------------------------------------|-------------------------------------------------------------------------------------------------------------------------------------------------------------------------------------------------------------------------------------|-----------------------------------------------------------------------------------------------------------------------------------------------------------------------------------------------------------------------------------------------------------------------------------------------------------------------------------------------------------------------------------------------------------------------|----------------------------------------------------------------------------------------------------------------------------------------------------------------------------|
| IPI00457499.5 | Gcn111 |        | GCN1 general control of amino-acid synthesis 1-like 1                  |                                                                                                                                                                                                                                     | LLTWVIGTGSPR,LTEVLTDSHVK,EGVLTGSPEQKEEAAGLGLVIR,QQVCIGLSEIMK,CLQNPCSDIR,LSGFWQLVVDEK,STLLEFYVK,GDTLLQALDFLPLLMQTV EK,ENKAYSFKEQIIE MELK,TLGTLVSHVTLR,LQELDGELEAALGLLDAIMAR,NPEILAIAPVLLDALTDPSR,IIIEDLLEATR,LSVADAQAEAK,GIKEEVQLTSK,VGKGEPDAAPLSAPAFSLVFPMLK,ENVNSLLPVFEEFLK,VLAFLSSVAGDALTR,RQAQQTVR,NPCGLIQYIPVLVDAFLPLLK,FSSVQLLGDLLFHISGVTGK,VLVAVLLSR,ILPEIIPILEEGLR,LVLPSELLAALEEEESWR,AIITALGVDR,AALLETLSLLLGK | VLPQLISTITASVQNPA LCLVTR,ILPEIIPILEEGLR,QQDIWNK,KNLVSLLL SMLGHDEDNTR,GPFLSLAACVMP PR,LQELDGELEAALGLLDAIMAR                                                                 |
| IPI00122565.1 | Q61598 | Gdi2   | Isoform 1 of Rab GDP dissociation inhibitor beta                       | FLVYVANFDEK,DWNVDLIPK,FDLGQDVIDFTGHSLALYR,FVSISDLFV PK,MLLFTEVTR,YIAIVSTTVETK,DLGTDSQIFISR,VPSTEAEALASSLMGLFEK                                                                                                                      | FDLGQDVIDFTGHSLALYR,FVSISDLFV PK,FLVYVANFDEKDP R,MLLFTEVTR,YIAIVSTTVETK,EIRPAL ELLEPIEQK,VIEGSFVYK,SPYLYP LYGLGELPQGFAR,VPSTEAEALASSLMGLFEK,DLGTDSQIFISR,LYSESLAR,VICILSHPIK                                                                                                                                                                                                                                          | AYDATTHFETTCD DIK,DWNVDLIPK ,FVSISDLFV PK,FLMANGQLVK,VIEGSFVYK,EIRPALELLEPIEQK,DLGTDSQIFISR,VPSTEAEALASSLMGLFEK,LYSESLAR,LSAIYGGTYMLNKPI EEIIVQNGK,PALELLEPIEQK,VICILSHPIK |
| IPI00169775.6 | Q6P6L6 | Gemin4 | Putative uncharacterized protein                                       |                                                                                                                                                                                                                                     |                                                                                                                                                                                                                                                                                                                                                                                                                       | KMCSLAVTNLGT HR,LSDYLEGFQEDLNTTFNQLAQSTSEQGLAK,FLAQI LTAFPALK                                                                                                              |
| IPI00230283.5 | Q8K0D5 | Gfm1   | Elongation factor G, mitochondrial                                     |                                                                                                                                                                                                                                     | GIIDLIEER,GVQPLLDVAVLEYLPN PSEVQNYAILNQND SK,AIYFDGD FGQIVR,YNVPFLTFINK,VHFDPE SK                                                                                                                                                                                                                                                                                                                                     |                                                                                                                                                                            |
| IPI00338876.3 | Q8R2Q4 | Gfm2   | Isoform 1 of Ribosome-releasing factor 2, mitochondrial                |                                                                                                                                                                                                                                     | GVQPLLDVAVTTYLPSPEER,VVLGFVPLAEIMGYSTVLR,LLL PFADQHVEIPSLTAGNIALTVGLK                                                                                                                                                                                                                                                                                                                                                 |                                                                                                                                                                            |
| IPI00278312.6 | Q9Z2Z9 | Gfpt2  | Glucosamine--fructose-6-phosphate aminotransferase [isomerizing] 2     |                                                                                                                                                                                                                                     | VIQQLEGAFALVFK,LIVIGCGTSY HAAVATR                                                                                                                                                                                                                                                                                                                                                                                     | WATHGVPNAVNSHPQR,GALTVGIT NTVGSSISR                                                                                                                                        |
| IPI00473912.4 | Q6Y7W8 | Gigyf2 | Isoform 1 of PERQ amino acid-rich with GYF domain-containing protein 2 | LTGRGGGGGT VVGAPR,ALSSGGSIT SPPLSPALPK,MVAYLQDSALDDER,EPIPEEQEMDFR,LNMGEIETLDDY,MSD QNIIPSVTR,ADPSLLGFVSNASSER,V PFSPGPAPPPHMGELDQER,PVETAA VEAPGMSSVSTEPDDEEGLK,AALSS QQQQLALLLQQFQALK,DVGRPNFE ESGPTSVGR,IPFDLLEK,VQKEPIPEEQEMDFR | SLLEIQQEEAR,EFLPILQEEPLPP LALVPFTEEEQR,ALQQQQQQQQ QK                                                                                                                                                                                                                                                                                                                                                                  |                                                                                                                                                                            |

|               |        |         |                                                           |                                                                                                                |                                                                                                                                                                                                                                                                                                                                                                                                                   |                                                                                                                                 |
|---------------|--------|---------|-----------------------------------------------------------|----------------------------------------------------------------------------------------------------------------|-------------------------------------------------------------------------------------------------------------------------------------------------------------------------------------------------------------------------------------------------------------------------------------------------------------------------------------------------------------------------------------------------------------------|---------------------------------------------------------------------------------------------------------------------------------|
| IPI00470095.1 | Q68FF6 | Git1    | ARF GTPase-activating protein GIT1                        | HGSGADSDYENTQSGDPLLGLEGK,E<br>NDAVWLATQNHSTLVTER                                                               |                                                                                                                                                                                                                                                                                                                                                                                                                   |                                                                                                                                 |
| IPI00127267.4 | Q91W43 | Gldc    | Glycine dehydrogenase<br>[decarboxylating], mitochondrial |                                                                                                                | SANVEAVDVAK,ATSNICTAQALL<br>ANMAAMFAIYHGSQGLK,VSFQP<br>NSGAQGEYAGLATIR,AGHQLQH<br>DLFFDTLK,LNSSSELAPITWR,EM<br>LQALGLASIDELIEK,DVCGVLFQY<br>PDTEGKVEDFTELVDVDR,VHNATLI<br>LSEGLK,MEDPICENEILETLHAIA<br>SK,TSPFLTHQVFNSYHSETNLVDR<br>,VEDFTELVDVDR,GYVAHEFILDTRP<br>FK,GYVAHEFILDTR,FGVPLGYG<br>GPHAAFFAVK,EFANIHPFVPLDQ<br>AQQYQQLFQGLEK,YGNIDVAHL<br>K,LFDDGTLGSLDETVTEK,NLLE<br>NSGWVTQYTPYQPEVSQGR,GV<br>LVELK | ATSNICTAQALLANMAAMFAIYHGS<br>QGLK,IDDIYGDQHLVCTCPPMEVY<br>ESPFSEQK,EFANIHPFVPLDQAQG<br>YQQLFQGLEK                               |
| IPI00122399.1 | Q61543 | Glg1    | Golgi apparatus protein 1                                 |                                                                                                                | ADIFVDPVLHTACALDIK,FCENTQ<br>AGEGR,VAELSSDDFHLDR,LNLT<br>TDPK,LLELQYFISR,AKDDSELEG<br>QVISCLK,MTAIFSDYR,DAHSQG<br>EVVSCLEK,LAEEESCREDVTR,A<br>LNEACESVIQTACK,IIQESALDYR<br>,RGGAGPGGTGGGWK,GEIEHHC<br>SGLHR                                                                                                                                                                                                       |                                                                                                                                 |
| IPI00416279.3 | Q9CYL5 | Glpr2   | Golgi-associated plant pathogenesis-<br>related protein 1 | YFPAGNIVNQFFEENVPPPKK,YFPA<br>GNIVNQFFEENVPPPK                                                                 |                                                                                                                                                                                                                                                                                                                                                                                                                   |                                                                                                                                 |
| IPI00321734.7 | Q9CPU0 | Glo1    | Lactoylglutathione lyase                                  | FSLYFLAYEDK,GLAFIQDPDGYWIEIL<br>NPNK,DFLLQQTMLR,VLGLTLLQK                                                      | GFGHIGIAPDVYSACK,RFEELG<br>VK,GLAFIQDPDGYWIEILNPNK,V<br>LGLTLLQK                                                                                                                                                                                                                                                                                                                                                  | RFEELGVK,VLGLTLLQK                                                                                                              |
| IPI00110721.5 | Q9CPV4 | Glod4   | Isoform 1 of Glyoxalase domain-<br>containing protein 4   | LELQGIQGAVDHAAAFGR,LLDDAMEA<br>DKSDEWFATR,SLNYWSNLLGMK                                                         |                                                                                                                                                                                                                                                                                                                                                                                                                   |                                                                                                                                 |
| IPI00315550.3 | Q9CQM9 | Glrx3   | Glutaredoxin-3                                            | TFSNWPTYQPLYVR,YEISSVPTFLFFK<br>,HNIQFSSFDIFSDEEVR                                                             | YEISSVPTFLFFK,LEAEAVPEVSE<br>K,LDGAHAPELTK                                                                                                                                                                                                                                                                                                                                                                        | YEISSVPTFLFFK,LDGAHAPELTK                                                                                                       |
| IPI00169870.6 | Q8K297 | Git25d1 | Glycosyltransferase 25 family member 1                    |                                                                                                                | NAAPALPATLGALEQLR,VLIALLA<br>R                                                                                                                                                                                                                                                                                                                                                                                    |                                                                                                                                 |
| IPI00122471.5 | Q8BK35 | Gltscr2 | glioma tumor suppressor candidate<br>region gene 2        | AGQPEAGDGTTEISPTGAAGPEKR,S<br>QADSGFLGLRPTSVDPALR,QLALPTS<br>EQAATQESVFR,AGQPEAGDGTTEISP<br>TGAAGPEK,LFFVDTGFK |                                                                                                                                                                                                                                                                                                                                                                                                                   |                                                                                                                                 |
| IPI00114209.1 | P26443 | Glud1   | Glutamate dehydrogenase 1,<br>mitochondrial               | DDGSWEVIEGYR,GFIGPGIDVPAPDM<br>STGER                                                                           | YSTDVSVDEVK,NLNHVSYGR,TA<br>AYVNAIEK                                                                                                                                                                                                                                                                                                                                                                              | PISQGGIHGR,NLNHVSYGR,LQHG<br>SILGFPK,HGGTIPVVPTAEFQDR,G<br>FIGPGIDVPAPDMSTGER,IKPCNH<br>VLSLSFPIR,YNLGLDLR,IIAEGANG<br>PTTPEADK |

|               |        |         |                                                             |                                                                                                                                                                                                      |                                                                                                                                                                                                                 |                                                                                                                                     |
|---------------|--------|---------|-------------------------------------------------------------|------------------------------------------------------------------------------------------------------------------------------------------------------------------------------------------------------|-----------------------------------------------------------------------------------------------------------------------------------------------------------------------------------------------------------------|-------------------------------------------------------------------------------------------------------------------------------------|
| IPI00123164.2 |        | Gm10077 | similar to ribosomal protein L36a                           | HFELGGDK, HFELGGDKK, GKDSLVAQ GK, DSLVAQGGK                                                                                                                                                          | HFELGGDK, LECVEPNCR                                                                                                                                                                                             |                                                                                                                                     |
| IPI00469918.4 | Q5CZY9 | Gm10079 | Rps16 protein                                               | GPLQSVQVFGR, ALVAYYQK, TLQYKL LEPVLLLGK, PLEMIEPR, FAGVDIR, LLE PVLLLGKER, TLLVADPR, DILIQYDR, TL QYKLEPVLLLGKER, GGGHVAQIYAIR, LLEPVLLLGK, GGGHVAQIYAIRQSISK ALVAYYQK                               | GPLQSVQVFGR, ALVAYYQK, VKG GGHVAQIYAIR, KTATAVAHCK, FAGVDIR, KFGGPGAR, EIKDILIQYDR, TLLVADPR, DILIQYDR, GGGHV AQIYAIR, LLEPVLLLGK                                                                               | GPLQSVQVFGR, PLEMIEPR, FAGV DIR, TLLVADPR, LLEPVLLLGK, GGG HVAQIYAIR, GGGHVAQIYAIRQSISK ALVAYYQK                                    |
| IPI00473762.1 |        | Gm10117 | similar to 60S ribosomal protein L9 isoform 1               | NFLGEK, DFNHINVELSLLGKK, FLDGIY VSEK, RDFNHINVELSLLGK, DELILEGN DIELVNSAALIQQATTVK, KFLDGIYVS EK, DFNHINVELSLLGK, TILSNQTVDIP ENVEITLK, SVYAHFPINVVIQENGLV EIR                                       |                                                                                                                                                                                                                 |                                                                                                                                     |
| IPI00850681.1 |        | Gm10117 | similar to 60S ribosomal protein L9 isoform 2               | FLDGIYVSEK, DFNHINVELSLLGKK, NF LGEK, RDFNHINVELSLLGK, DELILEGN DIELVNSAALIQQATTVK, MRTGDELI LEGNDIELVNSAALIQQATTVK, KFLD GIYVSEK, DFNHINVELSLLGK, TILSNQ TVDIPENVEITLK, SVYAHFPINVVIQEN GSLVEIR     |                                                                                                                                                                                                                 |                                                                                                                                     |
| IPI00473521.1 |        | Gm10119 | similar to ribosomal protein S3a                            | LITEDVQGGK, IASDGLK, KTSYAQQHQQV R, KWQTMIEAHVDVK, VFEVSLADLQN DEVAFR, EVQTNLTK, LIPDSIGK, WQT MIEAHVDVK, GRVFEVSLADLQND EVA FR, VFEVSLADLQND EVAFRK, TSYAQ HQQVR, LMELHGGSSGK, VVDPFS K, APAMFNIR   | LITEDVQGGK, KTSYAQQHQQVR, KW QTMIEAHVDVK, VFEVSLADLQND EVAFR, ACQSIYPLHDFVFR, LFCV GFTK, EVQTNLTK, NCLTNFHGM D LTR, TTDGYLLR, VFEVSLADLQND EVAFRK, TSYAQHQQVR, LMELH GEGGSSGK, ADGYEPPVQESV, V VDPFSK, APAMFNIR | LITEDVQGGK, TTDGYLLR, NCLTNFH GMDLTR, TSYAQHQQVR, LMELHGE GGSSGK, VFEVSLADLQND EVAFR, ACQSIYPLHDFVFR, APAMFNIR, LF CVGFTK, EVQTNLTK |
| IPI00461456.1 | P62751 | Gm10132 | 60S ribosomal protein L23a                                  | LDHYAIKFP LTTESAMK, AYVRLAPDY DALDVANK, KEAPAPPK, LYDIDVAK, V NTLIRPDGEK, LDHYAIK, FPLTTESAM K, KIEDNNTLVFIVDVK, NKLDHYAIKFP LTTESAMK, IEDNNTLVFIVDVK, LAPDY DALDVANKIGII, LAPDYDALDVANK, KL YDIDVAK | KIEDNNTLVFIVDVK, LAPDYDALD VANK                                                                                                                                                                                 |                                                                                                                                     |
| IPI00626233.3 |        | Gm10164 | similar to Rpl17 protein                                    | KSAEFLHMLK, GLDVDSLVIHQVVK, YSLDPENPTK, SAEFLHMLK, NAESNA ELK, EQIVPKPEEEVAQK                                                                                                                        | GLDVDSLVIHQVVK, YSLDPEN PTK, SAEFLHMLK, NAESNAELK, EQIVPKPEEEVAQK                                                                                                                                               |                                                                                                                                     |
| IPI00606310.1 |        | Gm10169 | similar to macrophage migration inhibitory factor isoform 1 |                                                                                                                                                                                                      | LLCGLLSDR, LHISPDR, ASVPEGFLS ELTQQLAQATGK                                                                                                                                                                      |                                                                                                                                     |



|               |        |         |                                                                          |                                                                                                                                                                      |                                                                                                                                                                                                                                                                                                                                                                                                                                                                                                                                         |                                                                                                                                       |
|---------------|--------|---------|--------------------------------------------------------------------------|----------------------------------------------------------------------------------------------------------------------------------------------------------------------|-----------------------------------------------------------------------------------------------------------------------------------------------------------------------------------------------------------------------------------------------------------------------------------------------------------------------------------------------------------------------------------------------------------------------------------------------------------------------------------------------------------------------------------------|---------------------------------------------------------------------------------------------------------------------------------------|
| IPI00124973.1 | P52293 | Gm10184 | Importin subunit alpha-2                                                 |                                                                                                                                                                      | ASLNLIK,GINSNLSQLQATQA ASLNLIK,TDCSPIQFESAWALTNIA<br>ARKLLSR,IQVILDAISNIFQAAEK, SGTSEQTK,IQVILDAISNIFQAAEK,<br>NPAPPLDAVEQILPTLVR,VIDAGA NPAPPLDAVEQILPTLVR,FVSFLGK,<br>LAVFPSLLTNP,K,FVSFLGK,IEVN VIDAGALAVFPSLLTNP,K,IEVNVELR<br>VELR,LLGATELPIVTPALR,GINSN ,NNQGTVNWSVEDIVK,LLGATELPI<br>NLESQIQATQAAR,AIGNIVTGT VTPALR,QDQIQQVNVHGLVPFLVG<br>EQTQK,HGAIDPLLALLAVPDLSTL VLSK,GINSNLSQLQATQAAR,AI<br>ACGYLR,AVVDGGAIPAFISLLASP GNIVTGTDEQTQK,HGAIDPLLALLA<br>HAHISEQAVWALGNIAGDGSAFR, VPDLSTLACGYLR,NLWTWLSNLCR,<br>HENESVYK KGVPQLVK |                                                                                                                                       |
| IPI00123007.1 | P62900 | Gm10191 | 60S ribosomal protein L31                                                | SAINEVVTR,EYTINIHK,NEDESPNKL<br>YTLVTVYVPVTTFK,LYTLVTVYVPVTTFK,<br>IHGVGFK                                                                                           | SAINEVVTR,NLQTVNVN DEN,LYTL<br>VTVYVPVTTFK,IHGVGFK                                                                                                                                                                                                                                                                                                                                                                                                                                                                                      | SAINEVVTR,EYTINIHK,LYTLVTVYVP<br>VTTFK,IHGVGFK                                                                                        |
| IPI00621613.1 |        | Gm10196 | similar to hCG1994130                                                    | HGYIGEFEINDDHR,QFGFIVLTTSAGI<br>MDHEEAR                                                                                                                              |                                                                                                                                                                                                                                                                                                                                                                                                                                                                                                                                         |                                                                                                                                       |
| IPI00752289.2 |        | Gm10290 | similar to Glyceraldehyde-3-phosphate<br>dehydrogenase (GAPDH) isoform 1 | VVDLMAYMASK,IVSNASCTTNCLAPL<br>AK,VIHDNFGIVEGLMTTVHAIATQK,<br>WGEAGAEYVMESTGVFTTMEK,LISW<br>YDNEYGYSNR,PITIFQER,VEIVAINDP<br>FIDLNYMVYMFQYDSTHGK,GAAQNIIP<br>ASTGAAK |                                                                                                                                                                                                                                                                                                                                                                                                                                                                                                                                         |                                                                                                                                       |
| IPI00756025.1 |        | Gm10313 | similar to LOC654472 protein                                             |                                                                                                                                                                      |                                                                                                                                                                                                                                                                                                                                                                                                                                                                                                                                         | MEGLMTTVHAIATQK,IVSNASCTT<br>NCLAPLAK,GLMTTVHAIATQK,VIH<br>DNFAIMEGLMTTVHAIATQK,LTGM<br>AFR,GAAQNIIPASTGAAK,IIISTPSA<br>DAPMFVMGVNHEK |
| IPI00128760.1 | P68037 | Gm10705 | Ubiquitin-conjugating enzyme E2 L3                                       | TDQVIQSLIALVNDPQPEHPLR,IEINFP<br>AEYPPFKPPK,NAEEFTK                                                                                                                  | TDQVIQSLIALVNDPQPEHPLR,NI<br>QVDEANLLTWQGLIVDPNPPYDK<br>,IEINFPAEYPPFKPPK,IYHPNIDEK                                                                                                                                                                                                                                                                                                                                                                                                                                                     |                                                                                                                                       |
| IPI00122421.5 | P61358 | Gm11518 | 60S ribosomal protein L27                                                | DVFRDPALK,VVLVLAGR,VYNYNHLM<br>PTR,YSVDIPLDK,NIDDGTSRDPYSHA<br>LVAGIDR                                                                                               | VVLVLAGR,VYNYNHLMPTR,YSV<br>DIPLDK,NIDDGTSRDPYSHALVA<br>GIDR                                                                                                                                                                                                                                                                                                                                                                                                                                                                            | WFFQK,VYNYNHLMPTR,YSVDIPLD<br>K,NIDDGTSRDPYSHALVAGIDR                                                                                 |
| IPI00461292.4 |        | Gm11531 | similar to Ribosomal protein L17 isoform<br>2                            | YSLDPENPTK,NAESNAELK,GLHVDSL<br>VIEHIQVNK                                                                                                                            |                                                                                                                                                                                                                                                                                                                                                                                                                                                                                                                                         |                                                                                                                                       |
| IPI00850073.1 |        | Gm12013 | similar to ribosomal protein L39                                         |                                                                                                                                                                      |                                                                                                                                                                                                                                                                                                                                                                                                                                                                                                                                         | PIPQWIR,QNRPIQWIR                                                                                                                     |
| IPI00749932.1 |        | Gm12141 | similar to Heat shock protein 1                                          | GVMLAVDAVIAELK                                                                                                                                                       |                                                                                                                                                                                                                                                                                                                                                                                                                                                                                                                                         | GANPVEIR,TVIIEQSWGSPK,TELLT<br>LSMLQEQLLKK                                                                                            |
| IPI00277753.1 |        | Gm12260 | similar to histone H3                                                    |                                                                                                                                                                      |                                                                                                                                                                                                                                                                                                                                                                                                                                                                                                                                         | EIAQDFK,RVTIMPK,STELLIR,FQSS<br>AVMALQEACESYLVLGFEDTNLCAI<br>HAKR,KLPFQR                                                              |
| IPI00620288.1 |        | Gm12938 | similar to ribosomal protein L28                                         | TVGVPEAADGK,KPATSYVR,SQKPVV<br>VK,YNGLIHR,KTVGVPEAADGK                                                                                                               | TVGVPEAADGK,KPATSYVR,SQK<br>PVVVK,KTVGVPEAADGK                                                                                                                                                                                                                                                                                                                                                                                                                                                                                          | TVGVPEAADGK,KPATSYVR,NCSS<br>FLIK,QTYSTEPNNLK,YNGLIHR                                                                                 |
| IPI00120871.1 | Q9DCG9 | Gm13072 | TRM112-like protein                                                      | VEWAALVQAADTLNLAEPVK,INPVEF<br>NPEFVAR                                                                                                                               |                                                                                                                                                                                                                                                                                                                                                                                                                                                                                                                                         | INPVEFNPEFVAR,LLTHNLLSSHVR                                                                                                            |

|               |        |         |                                      |                                                                                                                                                                                                                                                                           |                                                                                                                                                        |                                                                                          |
|---------------|--------|---------|--------------------------------------|---------------------------------------------------------------------------------------------------------------------------------------------------------------------------------------------------------------------------------------------------------------------------|--------------------------------------------------------------------------------------------------------------------------------------------------------|------------------------------------------------------------------------------------------|
| IPI00113655.1 | P62754 | Gm13654 | 40S ribosomal protein S6             | LFNLSKEDDVR,MATEVAADALGEEWK,QQVLTHGR,NKEEAAEYAK,LIEVDDER,DIPGLTDTTVPR,LIEVDDERK                                                                                                                                                                                           | MATEVAADALGEEWK,LNISFPATGCQK,NKEEAAEYAK,GCIVDANLSVLNLLVIVK,LIEVDDER,DIPGLTDTTVPR                                                                       | MATEVAADALGEEWK,LNISFPATGCQK,NKEEAAEYAK,LIEVDDER,GCIVDANLSVLNLLVIVK,DIPGLTDTTVPR         |
| IPI00473415.1 |        | Gm14059 | similar to 40S ribosomal protein S12 | TALIHDGLAR,DVIEEYFK,QAHLCLVALSNCDEPMYVK                                                                                                                                                                                                                                   | TALIHDGLAR,LGEWVGLCK,KVVGCGSCVVVK,DVIEEYFK,LVEALCAEHQINLIK                                                                                             | TALIHDGLAR,LGEWVGLCK,KVVGCGSCVVVK,LVEALCAEHQINLIK,VVVGSCVVVK                             |
| IPI00420261.5 | P63158 | Gm15387 | High mobility group protein B1       |                                                                                                                                                                                                                                                                           |                                                                                                                                                        | GEHPGLSIGDVAK,IKGEHPGLSIGDVAK,HPDASVNFSEFSK                                              |
| IPI00880213.1 |        | Gm15427 | ribosomal protein L18A family member | FWYFVSQLK,IFAPNHVVAK,SGTHNMYR,AHSIQIMK                                                                                                                                                                                                                                    | FWYFVSQLK,IFAPNHVVAK,NFGIWLRLR,FWYFVSQLKK,VEEIAAGK,DLTTAGAVTQCYR                                                                                       | FPLPHR,IFAPNHVVAK,NFGIWLRLR,HSIQIMK,CHTPPLYR,VEEIAAGK,DLTTAGAVTQCYR                      |
| IPI00849927.1 | Q5XJF6 | Gm15451 | ribosomal protein L10A               | AVDIPHMDIEALK,AVDIPHMDIEALKK,FLETVELQISLK,KYDAFLASESLIK,DTLYEAVR,KFLETVELQISLK,FPSLLTHNENMVAK,YDAFLASESLIK,ILGPGLNK,DTLYEAVREVLHGNQR                                                                                                                                      | AVDIPHMDIEALKK,FLETVELQISLK,FSVCVLGDQQHCDEAK,KYDAFLASESLIK,DTLYEAVR,VLCLAVAVGHVK,KVLCLAVAVGHVK,FPSLLTHNENMVAK,MTDDELVYNIHLAVNFLVSLK,ILGPGLNK           | AVDIPHMDIEALK,FSVCVLGDQQHCDEAK,VLCLAVAVGHVK,RFSGTVR,FPSLLTHNENMVAK,YDAFLASESLIK,ILGPGLNK |
| IPI00308706.4 | P47962 | Gm15500 | 60S ribosomal protein L5             | YLMEEDEDAYKK,NNVTPDMMEEMYK,K,VFGALKGAVDGGLSIPHSTK,RFPGYDSESK,KHIMGQNVADYMR,GAVDGGLSIPHSTK,FPGYDSESK,EFNAEVHR,NVTPDMMEEMYK,EFNAEVHR,HIMGQNVADYMR,EFNAEVHRK,TTTGNKVF,GALKGAVDGGLSIPHSTK,IEGDMIVCAAYAHELPK,KAHAAIR,DIICQIYARIEGDMIVCAAYAHELPK,YLMEEDEDAYKK,QFSQYIK,FPGYDSESK | DIICQIYAR,YLMEEDEDAYKK,RFPGYDSESK,ENPVYEK,GAVDGGLSIPHSTK,IEGDMIVCAAYAHELPK,IYEGQVEVNGGEYNVESIDGPGAFTCYLDAGLAR,EFNAEVHR,VGLTNYAAAYCTGLLLAR,HIMGQNVADYMR | RFPGYDSESK,ENPVYEK,GAVDGGLSIPHSTK,EFNAEVHR,VGLTNYAAAYCTGLLLAR,HIMGQNVADYMR               |
| IPI00224505.7 | P47963 | Gm15710 | 60S ribosomal protein L13            | SKLILFPR,LATQLTGPMPIR,NGMILKPHFHK,KGDSSAEELK,TIGISVDPR,AK,EAAEQDVEK,GFSLEELR,STESLQANVQR,EAAEQDVEK                                                                                                                                                                        | NGMILKPHFHK,VDTWFNQPAR,TIGISVDPR,GFSLEELR,STESLQANVQR                                                                                                  |                                                                                          |
| IPI00132460.1 | P61255 | Gm15772 | 60S ribosomal protein L26            | HFNAPSHIR,KYVIYIER,MKFNPFVTSDR,YVIYIER,YKEETIEK,DDEVQVVR,VVQVYR,ANGTTVHVGIIHPSK,KDDEVQVVR,FNPFVTSDR,IMSSPLSK,KIMSSPLSK                                                                                                                                                    | HFNAPSHIR,EKANGTTVHVGIIHPSK,KYVIYIER,DDEVQVVR,YVIYIER,KDDEVQVVR,ANGTTVHVGIIHPSK,FNPFVTSDR,VVQVYR                                                       | HFNAPSHIR,YVIYIER,YKEETIEK,VVQVYR,FNPFVTSDR,ANGTTVHVGIIHPSK,KDDEVQVVR                    |

|               |        |         |                                                                               |                                                                                                                                                                                                                                                                                                                                                                             |                                                                                                                                                           |                                                                                                                                                                                           |
|---------------|--------|---------|-------------------------------------------------------------------------------|-----------------------------------------------------------------------------------------------------------------------------------------------------------------------------------------------------------------------------------------------------------------------------------------------------------------------------------------------------------------------------|-----------------------------------------------------------------------------------------------------------------------------------------------------------|-------------------------------------------------------------------------------------------------------------------------------------------------------------------------------------------|
| IPI00755309.1 | Q91VJ6 | Gm16468 | ribosomal protein L3                                                          | SINPLGGFVHYGEVTNDFIMLK,PVHLT<br>AFLGYK,LEQQVPVNQVFGQDEMIDVI<br>GVTK,DDASKPVHLTAFLGYK,IGQGYL<br>IK,ERLEQQVPVNQVFGQDEMIDVIGV<br>TK,KAHLMIEIQVNGGTVAEK,KEVVEA<br>VTIVETPPM VVVGIVGYVETPR,AHLM<br>EIQVNGGTVAEK,EVVEAVTIVETPPM<br>VVVGIVGYVETPR,AFMGPLKK,NNAS<br>TDYDLSDK,DDASKPVHLTAFLGYKAG<br>MTHIVR,FIDTTSK,AGMTHIVR,SFPKD<br>DASKPVHLTAFLGYK,HGSLGFLPR,W<br>QDDTGKK,IIAHTQMR | SINPLGGFVHYGEVTNDFIMLK,T<br>VFAEHISDECKR,DDASKPVHLTA<br>FLGYK                                                                                             | KYCQVIR,SINPLGGFVHYGEVTNDF<br>IMLK,PVHLTAFLGYK,VACIGAWHP<br>AR,LEQQVPVNQVFGQDEMIDVIGV<br>TK,IGQGYLIK,TVFAEHISDECK,FQT<br>MEEK,AGMTHIVR,HGSLGFLPR,W<br>QDDTGKK,SLLVQTK,IIAHTQMR,YC<br>QVIR |
| IPI00848775.1 |        | Gm16470 | similar to Glyceraldehyde-3-phosphate<br>dehydrogenase                        | VVDLMAYMASK,IVSNASCTTNCLAPL<br>AK,LVINGKPITIFQER,PITIFQER,RVIIS<br>APSADAPMFVMGVNHEK,VEIVAINDP<br>FIDLNYMVYMFQYDSTHGK,VIISAPSA<br>DAPMFVMGVNHEK,VIHDNFGIVKGLM<br>TTVHAITATQK                                                                                                                                                                                                |                                                                                                                                                           |                                                                                                                                                                                           |
| IPI00263879.4 | Q6ZVV7 | Gm2000  | 60S ribosomal protein L35                                                     | QLDDLKVELSQLR,VLTVINQTQKENL<br>R,VLTVINQTQK,KKEELLK,YKPLDLRP<br>K                                                                                                                                                                                                                                                                                                           | VLTVINQTQK,YKPLDLRPK                                                                                                                                      | VLTVINQTQK,PLDLRPK,YKPLDLRP<br>K                                                                                                                                                          |
| IPI00851014.1 |        | Gm2223  | similar to translation initiation factor eIF-2<br>gamma subunit               | SCGSSTPDEFPTDIPGTKGNFK,IVSLF<br>AEHNDLQYAAPGGLIGVGTK                                                                                                                                                                                                                                                                                                                        | AISGVHTVR,HILILQNK,VGQEIEV<br>RPGIVSK,YNIEVVCEYIVK,IVLTN<br>PVCTEVGEK,IVSLFAEHNDLQYA<br>APGGLIGVGTK,EQYEQILAFVQG<br>TVAEGAPIIPISAQLK,NEVLMVNI<br>GSLSTGGR | VGQEIEVR,AISGVHTVR,HILILQNK,<br>VGQEIEVRPGLVSK,IVLTNPVCTEV<br>GEK,IVSLFAEHNDLQYAAPGGLIGV<br>GTK,LIGWGQIR,IDPTLCR                                                                          |
| IPI00850093.1 |        | Gm3150  | similar to G protein gamma-5 subunit                                          |                                                                                                                                                                                                                                                                                                                                                                             | KVVQQLR,VSQAAADLK                                                                                                                                         |                                                                                                                                                                                           |
| IPI00849598.1 |        | Gm3405  | similar to QM protein                                                         | VHIGQVIMSIR,VDEFPLCGHMVSDEY<br>EQLSSEALEAAR,GAFGKPQGTVAR,IF<br>DLGR,FNADEFEDMVAEKR,FNADEFE<br>DMVAEK                                                                                                                                                                                                                                                                        | VHIGQVIMSIR,GAFGKPQGTVAR,<br>EHVIEALR,MLSCAGADR,EHVIEA<br>LRR                                                                                             | VHIGQVIMSIR,RLIPDGCQVK,GAFG<br>KPQGTVAR,EHVIEALR,MLSCAGAD<br>R                                                                                                                            |
| IPI00469351.3 |        | Gm4130  | similar to heterogeneous nuclear<br>ribonucleoprotein K                       | FLAAGTHLGGTDLDFQMEQYIYK,AIVA<br>IENPADVSVISSR,LLIHQSLAGGIIGVK                                                                                                                                                                                                                                                                                                               | FLAAGTHLGGTDLDFQMEQYIYK,<br>VVLIGGKPADR,AIVAIENPADVSVI<br>SSR,LLIHQSLAGGIIGVK                                                                             |                                                                                                                                                                                           |
| IPI00874692.1 |        | Gm4294  | similar to ribosomal protein L15                                              | FFEVLIDPFHK,GATYGKPVHHGVNQL<br>K,RNPDTQWITK,NTLQLHR,VLNSYVW<br>GEDSTYK,PVHHGVNQLK,SLQSVAAE<br>R                                                                                                                                                                                                                                                                             |                                                                                                                                                           |                                                                                                                                                                                           |
| IPI00850166.1 |        | Gm4340  | PREDICTED: similar to RNA and export<br>factor binding protein 1-II isoform 1 | KADALK,PMNIQLATSQIDR                                                                                                                                                                                                                                                                                                                                                        |                                                                                                                                                           |                                                                                                                                                                                           |
| IPI00849768.1 |        | Gm4363  | similar to HSPC016                                                            |                                                                                                                                                                                                                                                                                                                                                                             | AAGKGPLATGGIKK,GPLATGGIK,<br>KLEQLK                                                                                                                       |                                                                                                                                                                                           |
| IPI00272545.5 |        | Gm4613  | similar to ribosomal protein L37a                                             |                                                                                                                                                                                                                                                                                                                                                                             | IEISQHAK,KIEISQHAK                                                                                                                                        | IEISQHAK,KIEISQHAK,YTCSFCGK                                                                                                                                                               |

|               |        |        |                                                            |                                                                                                                                                                                                             |                                                                     |                                                                                                                                                                        |
|---------------|--------|--------|------------------------------------------------------------|-------------------------------------------------------------------------------------------------------------------------------------------------------------------------------------------------------------|---------------------------------------------------------------------|------------------------------------------------------------------------------------------------------------------------------------------------------------------------|
| IPI00466153.4 | Q9D1R9 | Gm4705 | 60S ribosomal protein L34                                  | RLSYNTASNK,LSYNTASNK,AFLIEEQ<br>K                                                                                                                                                                           | RLSYNTASNK,LSYNTASNK,AFLI<br>EEQK,IVVLYTK                           | LSYNTASNK,SACGVCPCGR                                                                                                                                                   |
| IPI00762179.2 |        | Gm4720 | similar to ORF1                                            | AWTDVIQTLR,IIGIDENEDFQLK,ISGA<br>EDSIENIGTTIK                                                                                                                                                               |                                                                     |                                                                                                                                                                        |
| IPI00343021.3 |        | Gm4838 | hypothetical protein                                       | IAGQVAAVSK,VLQALEGLK,ELAPYDE<br>KWFYTR,RVLQALEGLK,HLYLR                                                                                                                                                     |                                                                     |                                                                                                                                                                        |
| IPI00890115.1 |        | Gm4968 | PREDICTED: hypothetical protein                            | ESEIIDFFLGASLKDEVLK,AEDKEWIP<br>VTK,TYSYLTPDLWK,SLEEIYLFSLPIK,<br>ETVFTK,IKSLEEIYLFSLPIK,ESEIIDFF<br>LGASLK                                                                                                 | IGKPHTVPCK,SLEEIYLFSLPIK,G<br>CTATLGNFAKAIKFAISKTYSYLT<br>DLWK      |                                                                                                                                                                        |
| IPI00606944.2 |        | Gm4970 | hypothetical protein                                       |                                                                                                                                                                                                             |                                                                     | AQLVVIAHDVDPIELVVFLPALCR,R<br>HWGGNVLGPK,AGVNTVTTLVENK,<br>VPPAINQFTQALDR,NFGIGQDIQPK<br>,QTATQLLK,LKVPPAINQFTQALDR,<br>HWGGNVLGPK,TCTTVAFTQVNSE<br>DK,LGHLVHR,LLAHAEK |
| IPI00108337.5 |        | Gm4986 | similar to Ac2-210                                         | YSLDPENPTK                                                                                                                                                                                                  | YSLDPENPTK,GLEVESLVIEHIQV<br>NK                                     |                                                                                                                                                                        |
| IPI00128267.4 | A2AD25 | Gm4987 | MCG49690                                                   | AAQLAIR,ELEVLLMCNKSYCAEIAHNV<br>SSK,FLVHDVK                                                                                                                                                                 | ELEVLLMCNK,SYCAEIAHNVSSK                                            |                                                                                                                                                                        |
| IPI00469327.5 |        | Gm5068 | similar to endothelial monocyte-<br>activating polypeptide |                                                                                                                                                                                                             | DPGVLDLDR,TEFLSFMNTELAFTK                                           |                                                                                                                                                                        |
| IPI00676841.1 | Q2YD80 | Gm5081 | hypothetical protein LOC328099                             |                                                                                                                                                                                                             | RVTSIADR,VYAILTHGIFSGPAISR<br>,MVLVGDVK,IFSGSSHQDLSQK,L<br>NVDFALHK | VTAVIPCFFPYAR,NCTIVSPDAGGAK<br>,GEDVYIVQSGCGEINDNLMELLIMI<br>NACK,IFSGSSHQDLSQK,LLSAGAT<br>R                                                                           |
| IPI00671398.1 |        | Gm5121 | similar to ribosomal protein S8 isoform 1                  | ISSLLEEQFQQGK,QWYKSHYALPLGR<br>,IIDVVYNASNNELV,RIHTVR,KYELG<br>R,LTPEEEEEILNK,ADGYVLEGK                                                                                                                     |                                                                     |                                                                                                                                                                        |
| IPI00849245.1 |        | Gm5218 | similar to ribosomal protein                               |                                                                                                                                                                                                             | AQASAPAQAPK,AGAKAPAKAQA<br>SAPAQAPK                                 |                                                                                                                                                                        |
| IPI00395100.1 | Q7M754 | Gm5409 | Try10-like trypsinogen                                     | TLDNDIMLIK,LSSPVTLNAR,KTLDNDIM<br>LIK,TLDNDIMLIK,LGEHNINVLEGNEQ<br>FIDAANIVKHPKFK                                                                                                                           |                                                                     |                                                                                                                                                                        |
| IPI00457852.3 |        | Gm5428 | similar to ribosomal protein L6                            | YYPTEDVPR,HQEGEIFDTEKEYEITE<br>QR,HQEGEIFDTEK,THQKFVIATSTKV<br>DISDVK,QLDSGLLLVTGPLVINR,FVIA<br>TSTKVDISDVK,SFPQLSAVLGFMST,<br>QLDSGLLLVTGPLVINRVLPLR,YEITEQ<br>R,EKYEITEQR,AVDLQILPK,HLTDAYF<br>K,KPFSQHVR |                                                                     |                                                                                                                                                                        |
| IPI00461504.1 |        | Gm5445 | similar to hCG1782414 isoform 1                            | VYNVTQHAVGIIVNK,KGDIVDIK                                                                                                                                                                                    | VYNVTQHAVGIIVNK,KGDIVDIK                                            |                                                                                                                                                                        |
| IPI00890082.1 |        | Gm5534 | hypothetical protein                                       |                                                                                                                                                                                                             |                                                                     | GTWVQLK,KGDIVNIK                                                                                                                                                       |

|               |        |        |                                                        |                                                                                                                                                                                                                                                  |                                                                                                                                                                       |                                                                                                                                                               |
|---------------|--------|--------|--------------------------------------------------------|--------------------------------------------------------------------------------------------------------------------------------------------------------------------------------------------------------------------------------------------------|-----------------------------------------------------------------------------------------------------------------------------------------------------------------------|---------------------------------------------------------------------------------------------------------------------------------------------------------------|
| IPI00621272.3 | Q9D0T1 | Gm5616 | NHP2-like protein 1                                    |                                                                                                                                                                                                                                                  | GISEFIVMAADAEPLEIILHPLLLCE<br>DK,LLDLVQQSCNYK,PVIACSVTI<br>K                                                                                                          | AYPLADAHLTK,QQIQSIQQSIER,LL<br>DLVQQSCNYK                                                                                                                     |
| IPI00470152.2 | Q642L7 | Gm6111 | ribosomal protein S27a                                 | TITLEVEPSDTIENVK,ECPSDECGAGV<br>FMGSHFDR,MQIFVK,TLSDYNIQKEST<br>LHLVLR,ESTLHLVLR,MQIFVKTLTGKT<br>ITLEVEPSDTIENVK,TLSDYNIQK,TL<br>DYNIQKESTLHLVLRRLR,LIFAGK,IQDK<br>EGIPPDQQR                                                                     | TITLEVEPSDTIENVK,MQIFVK,TL<br>SDYNIQKESTLHLVLR,ESTLHLVLR,<br>R,TLSDYNIQK,IQDKEGIPPDQQR<br>,EGIPPDQQR,TLTGKTITLEVEPS<br>DTIENVK                                        |                                                                                                                                                               |
| IPI00875351.2 | B2RY53 | Gm6133 | EG620155 protein                                       | NAESNAELK,EQIVPKPEEEVAQK                                                                                                                                                                                                                         |                                                                                                                                                                       | RYHGGVGTCTQAK,KQCVFPR,NAE<br>SNAELK,EQIVPKPEEEVAQK                                                                                                            |
| IPI00626312.1 |        | Gm6136 | similar to ribosomal protein L6                        | YYPTEDVPR,HQEGEIFDTEKEKYEITE<br>QR,THQKFVIATSTKVDISDVK,HQEGE<br>IFDTEK,QLDSGLLLVTGPLVINR,FVIAT<br>STKVDISDVK,SQFSLTNGMPYHK,QLD<br>SGLLLVTGPLVINRVPLR,YEITEQR,EK<br>YEITEQR,LRSSITPGTVLIILTGR,AVDL<br>QILPK,HLTDAYFK,KPFSQHVR,SSITP<br>GTVLIILTGR | YYPTEDVPR,VDISDVK,AVDLQIL<br>PK,QLDSGLLLVTGPLVINR,AVPQ<br>LQGYLR,VVFLKQLDSGLLLVTGP<br>LVINR,FVIATSTK,HLTDAYFK,YEI<br>TEQR,HQEGEIFDTEKEK,EKYEIT<br>EQR,SSITPGTVLIILTGR | YYPTEDVPR,HQEGEIFDTEK,VDIS<br>DVK,QLDSGLLLVTGPLVINR,PFSQ<br>HVR,AVPQLQGYLR,YEITEQR,EKY<br>EITEQR,AVDLQILPK,FVIATSTK,HL<br>TDAYFK,KPFSQHVR,SSITPGTVLIIL<br>TGR |
| IPI00889220.1 |        | Gm6251 | ribosomal protein-like                                 | GQILMPNIGYGSNK,AAQLAIR,KFLVH<br>NVK,FLVHNVKELEVLLMCNR                                                                                                                                                                                            |                                                                                                                                                                       |                                                                                                                                                               |
| IPI00622837.1 |        | Gm6265 | hypothetical protein                                   |                                                                                                                                                                                                                                                  | AYAIFYR,NYDSMKDFEEMRK,A<br>GIFQSAK,FGVAEPR                                                                                                                            |                                                                                                                                                               |
| IPI00123176.1 |        | Gm6316 | 37 kDa protein                                         | MEGLMTTVHAITATQK,IVSNASCTTN<br>CLAPLAK,LVINGKPITIFQER,LISWYD<br>NEYGYSNR,PITIFQER,RVIISAPSADA<br>PMFVMGVNHEK,VIISAPSADAPMFVM<br>GVNHEK,GAAQNIIPASTGAAK                                                                                           |                                                                                                                                                                       |                                                                                                                                                               |
| IPI00116252.1 | Q99L28 | Gm6457 | Probable ribosome biogenesis protein RLP24             | MVQQLQEDVDMEEAS,ELTVDNSFEF<br>EK                                                                                                                                                                                                                 |                                                                                                                                                                       |                                                                                                                                                               |
| IPI00133801.3 | Q9D1J3 | Gm6563 | SAP domain-containing ribonucleoprotein                |                                                                                                                                                                                                                                                  |                                                                                                                                                                       | ITSGIPQTER,FGIVTSSAGTGTEDT<br>EAK,FNVPVSLESK,FGLNVSSISR,F<br>GISSVPTK                                                                                         |
| IPI00850777.1 |        | Gm6570 | similar to ribosomal protein L30                       |                                                                                                                                                                                                                                                  | VCTLAIIDPGDSDIIR,LVILANNC<br>ALR                                                                                                                                      |                                                                                                                                                               |
| IPI00663555.1 |        | Gm6630 | similar to ribosomal protein                           | IPDWFLNR,VLNTDIDGR,VITIMQNPR                                                                                                                                                                                                                     |                                                                                                                                                                       |                                                                                                                                                               |
| IPI00674601.1 |        | Gm6654 | similar to ribosomal protein S26                       | LHYCVSCAIHSK,NIVEAAAVR,DISEAS<br>VFDAYVLPK                                                                                                                                                                                                       | NIVEAAAVR,DISEASVFDAYVLPK                                                                                                                                             |                                                                                                                                                               |
| IPI00109696.1 | Q9CWW6 | Gm6851 | Peptidyl-prolyl cis-trans isomerase NIMA-interacting 4 | GSMVGPFEAAAFALPVSMDKPVFT<br>DPPVK,FSEVATQYSEDK,FGYHIIMVE<br>GR                                                                                                                                                                                   |                                                                                                                                                                       |                                                                                                                                                               |
| IPI00757219.1 |        | Gm6910 | 25 kDa protein                                         | DKDISPSVTK,PAADEGFWDCSVCTFR<br>,SDILKDPPEANSIQSANATTK,INSQL<br>VAQQVAQQYATPPPPK,INSQLVAQQV<br>AQQYATPPPPK                                                                                                                                        |                                                                                                                                                                       |                                                                                                                                                               |
| IPI00620075.2 |        | Gm6941 | similar to human protein homologous to DROER protein   |                                                                                                                                                                                                                                                  | IYVLLR,ADTQTYQPYNK                                                                                                                                                    |                                                                                                                                                               |

|               |        |        |                                                     |                                                                                                                                                                              |                                                                                                                                                                                                                                                                           |                                                                    |
|---------------|--------|--------|-----------------------------------------------------|------------------------------------------------------------------------------------------------------------------------------------------------------------------------------|---------------------------------------------------------------------------------------------------------------------------------------------------------------------------------------------------------------------------------------------------------------------------|--------------------------------------------------------------------|
| IPI00625893.3 |        | Gm6981 | 36 kDa protein                                      | IVSNASCTTNCLAPLAK,RVIISAPSADA<br>PMFVMGVNHEK,VIISAPSADAPMFVM<br>GVNHEK,GAAQNIIPASTGAAK                                                                                       | IVSNASCTTNCLAPLAK,GAAQNII<br>PASTGAAK, VGVNGFGR, GILGYT<br>EDQVVSDFNSNSYSSTFDAGA<br>GIALNDNFVK                                                                                                                                                                            |                                                                    |
| IPI00621229.1 |        | Gm6998 | similar to ribosomal protein S8 isoform 2           | ISSLLEEQQQGGK,IIDVVYNASNNELV<br>R,QWYESHYALPLGR,RIHTVR,KYELG<br>R,LTPEEEEEILNK,LDVGNFSWGSECCT<br>R,YELGRPAANTK,KYELGRPAANTK,A<br>DGYVLEGGK                                   | ISSLLEEQQQGGK,LLACIASR,IID<br>VVYNASNNELVR,NCIVLIDSTPYR<br>,LTPEEEEEILNK,LDVGNFSWGSE<br>CCTR,KYELGRPAANTK,YELGRP<br>AANTK,ADGYVLEGGK                                                                                                                                      |                                                                    |
| IPI00666411.2 |        | Gm7189 | similar to Glyceraldehyde-3-phosphate dehydrogenase |                                                                                                                                                                              | GILGYTEDQIVSCNFNSNSHPLTL<br>GAGTEIALNDNFVK,QASEGPLK                                                                                                                                                                                                                       |                                                                    |
| IPI00756253.2 |        | Gm7206 | similar to 60S ribosomal protein L9                 | FLDGIYVSEK,NFLGEK,KFLDGIYVSEK<br>,SVYAHFPINVVIQENGLVEIR                                                                                                                      | FLDGIYVSEK,DELILEGNDIELVS<br>NSVALIQQATTVK,TGVACSVSQA<br>QK,KFLDGIYVSEK,TICSHVQNM<br>K,SVYAHFPINVVIQENGLVEIR                                                                                                                                                              |                                                                    |
| IPI00889899.1 |        | Gm7251 | hypothetical protein                                |                                                                                                                                                                              | VIHDNCGIVEGLMTTVHAITATQK,<br>GLMTTVHAITATQK,PITIFQER,LT<br>GMAFR,GAAQNIIPASTGAAK,QA<br>SEGPLK                                                                                                                                                                             |                                                                    |
| IPI00751677.3 |        | Gm7293 | similar to Glyceraldehyde-3-phosphate dehydrogenase | VVDLMAYMASK,IVSNASCTTNCLAPL<br>AK,VIHDNFGIVEGLMTTVHAITATQK,L<br>ISWYDNEYGYSNR,RVIISAPSADAPM<br>FVMGVNHEK,VEIVAINDPFIDLNYMVY<br>MFQYDSTHGK,VIISAPSADAPMFVMG<br>VNHEK,VGVNGFGR | VVDLMAYMASK,IVSNASCTTNCL<br>APLAK,GLMTTVHAITATQK,LISW<br>YDNEYGYSNR,VIHDNFGIVEGLM<br>TTVHAITATQK,VEIVAINDPFIDLN<br>YMVYMFQYDSTHGK,LVINGKPIT<br>VFQER,RVIISAPSADAPMFVMGV<br>NHEK,VIISAPSADAPMFVMGVNH<br>EK,LTGMAFR,VGVNGFGR,GILG<br>YTEDQVVSCDFNSNSHSSTFDA<br>GAGIALNDNFVK |                                                                    |
| IPI00626628.1 | Q9CQ16 | Gm7536 | ribosomal protein L27a                              | TGVAPIIDVVR,GHVSHGHGR,LWTLVLS<br>EQTR,TGVAPIIDVVRSGYYKVLGK                                                                                                                   | TGVAPIIDVVR,NQSFCPTVNLDK,<br>LWTLVSEQTR                                                                                                                                                                                                                                   | TGVAPIIDVVR,NQSFCPTVNLDK,L<br>WTLVSEQTR,YHPGYFGK,RNQSFC<br>PTVNLDK |
| IPI00230150.1 | P62309 | Gm8186 | Small nuclear ribonucleoprotein G                   | HVQGILR,GNSIIMLEALER                                                                                                                                                         | AHPPELK,HVQGILR,GNSIIMLEAL<br>ER,GNSIIMLEALERV,AHPPELKK                                                                                                                                                                                                                   |                                                                    |
| IPI00330363.8 | P12970 | Gm8226 | 60S ribosomal protein L7a                           |                                                                                                                                                                              | KVVNPLFEK,AQLVVIAHDVDPIEL<br>VVFLPALCR,AGVNTVTTLVENK,V<br>PPAINQFTQALDR,VVNPLFEK,NF<br>GIGQDIQPK,LKVPPAINQFTQALD<br>R,LGHLVHR,TCTTVAFTQVNS<br>EDK,AGVNTVTTLVENKK,KTCTTVA<br>FTQVNS<br>EDK                                                                                 |                                                                    |

|               |        |        |                                                        |                                                                                                                                                                                                                   |                                                                                                                                                                                             |
|---------------|--------|--------|--------------------------------------------------------|-------------------------------------------------------------------------------------------------------------------------------------------------------------------------------------------------------------------|---------------------------------------------------------------------------------------------------------------------------------------------------------------------------------------------|
| IPI00880400.1 | P25444 | Gm8553 | 40S ribosomal protein S2                               | LSIVPVR,TYSYLTPLDWK,AEDKEWIP<br>VTK,EVATAIRGAILAKLSIVPVR,GTGI<br>VSAPVPK,ESEIIDFFLGASLKDEVLK,F<br>KAFVAIGDYNGHVGLGVK,SLEEIYLF<br>LPIK,IKSLEEIYLFSLPIK,ETVFTK,ESEI<br>DFFLGASLK,AFVAIGDYNGHVGLGVK,<br>SPYQEFTDHLVK | LSIVPVR,GTGIVSAPVPK,TYSYLT<br>PDLWK,AEDKEWIPVTK,IGKPHT<br>VPCK,SLEEIYLFSLPIK,GCTATLG<br>NFAK,ESEIIDFFLGASLK,AFVAIG<br>DYNGHVGLGVK,SPYQEFTDHLV<br>K,ATFDAISK                                 |
| IPI00626366.3 |        | Gm8730 | similar to Acidic ribosomal<br>phosphoprotein P0       | IIQLLDDYPK,TSFFQALGITTK,GTIEILS<br>DVQLIK                                                                                                                                                                         | AGAIAPCEVTVPAQNTGLGPEK,V<br>LALSVETEYTFPLAEK,SNYFLK,G<br>NVGFVFTK,NVASVCLQIGYPTVA<br>SVPHSIINGYK,IIQLLDDYPK,AFL<br>ADPSAFAAAAAAATAAPAAA<br>AAPAK,TSFFQALGITTK,GHLENN<br>PALEK,GTIEILSDVQLIK |
| IPI00752723.1 |        | Gm8842 | hypothetical protein isoform 2                         | GTGIVSAPVPK,LSIVPVR,AEDKEWIPV<br>TK,TYSYLTPLDWK,ESEIIDFFLGASLK<br>DEVLK,FKAFVAIGDYNGHVGLGVK,M<br>ADDAGVAGGPGGGPGLGGRSGF<br>R,IKSLEEIYLFSLPIK,ETVFTK,SLEEIY<br>LFSLPIK,ESEIIDFFLGASLK,AFVAIGD<br>YNGHVGLGVK        |                                                                                                                                                                                             |
| IPI00848866.1 |        | Gm8894 | similar to non-muscle myosin alkali light<br>chain     | NKDQGTIEDYVEGLR,DQGTIEDYVE<br>GLR,VLDFEHFLPMLQTVAK                                                                                                                                                                |                                                                                                                                                                                             |
| IPI00918622.1 |        | Gm8994 | predicted gene, EG668137                               | GIYAYGFEEKPSAIQQR,MLVLDEADEM<br>LNR                                                                                                                                                                               | ELAVQIQK,GIYAYGFEEKPSAIQQR<br>,KLDYGQHVVAGTPGR,LDYGQH<br>VVAGTPGR,GLDVPQVSLIINYDL<br>PNNR,VLISTDVWAR,GRDVIAQS<br>QSGTGK,ETQALILAPTR,KVDWL<br>TEK                                            |
| IPI00753102.2 |        | Gm9034 | similar to Glyceraldehyde-3-phosphate<br>dehydrogenase | VVDLMAYMASK,IVSNASCTTNCLAPL<br>AK,VGVNGFGR,WGNAGAEYVVESTG<br>VFTTMEK                                                                                                                                              | VVDLMAYMASK,IVSNASCTTNCL<br>APLAK,LVINGKPITVFQER,GILGY<br>TEDQVVSYDFNSNSHSSTFDAGA<br>GIALNINFVK,VGVNGFGR                                                                                    |
| IPI00626504.2 |        | Gm9093 | similar to Acidic ribosomal<br>phosphoprotein P0       | IIQLLDDYPK,GTIEILSDVQLIK                                                                                                                                                                                          | GNVGFVFTK,SNYFLK,VGAIAPCEV<br>TMPAQNTGLGPEK,IIQLLDDYPK,C<br>FIVGADNVGSK,GHLENNPALEK,GT<br>IEILSDVQLIK                                                                                       |
| IPI00115426.1 | Q99JP4 | Gm9174 | Anaphase-promoting complex subunit<br>CDC26            | LDDIEEFESIR,IGYKPQLK                                                                                                                                                                                              |                                                                                                                                                                                             |
| IPI00120395.4 |        | Gm9387 | similar to Ttc5 protein                                |                                                                                                                                                                                                                   | QLQTDSGDEHSR,LAVQIDVLDG<br>R                                                                                                                                                                |
| IPI00849793.1 | P35979 | Gm9396 | 60S ribosomal protein L12                              | VGDDIAK,HSGNITFDEIVNIAR,IGPLGL<br>SPK,KVGDDIAK,QAQIEVVPASALIIK,<br>ELSGTIK                                                                                                                                        | HPHDIIDDINSGAVECPAS,HSGNI<br>TFDEIVNIAR,IGPLGLSPK,EILGTA<br>QSVGCNVDGR,KVGDDIAK,QAQI<br>EVVPASALIIK                                                                                         |
|               |        |        |                                                        |                                                                                                                                                                                                                   | CTGGEVGSATLAPK,HPHDIIDDIN<br>SGAVECPAS,IGPLGLSPK,EILGTAQ<br>SVGCNVDGR,KVGDDIAK,QAQIEV<br>PSASALIIK                                                                                          |

|               |        |        |                                                                     |                                                                                                           |                                                                                                                                                                                                                                                                                               |                                                                                                                                                                                                                                  |
|---------------|--------|--------|---------------------------------------------------------------------|-----------------------------------------------------------------------------------------------------------|-----------------------------------------------------------------------------------------------------------------------------------------------------------------------------------------------------------------------------------------------------------------------------------------------|----------------------------------------------------------------------------------------------------------------------------------------------------------------------------------------------------------------------------------|
| IPI00625588.1 | Gm9755 |        | hypothetical protein                                                | TIGTGLVTDVPAMTEEDKNIK,LLDAVD<br>TYIPVPTR                                                                  | TTLTAAITK,GITINAAHVEYSTAAR<br>,KGDECELLGHNK,AEAGDNLGAL<br>VR,LLDAVDTYIPVPTR,VEAQVYIL<br>SK,GTVVGTGLER,DKPHVNVGTI<br>GHVDHGK                                                                                                                                                                   | TTLTAAITK,KGDECELLGHNK,LLDA<br>VDYIPVPTR,GTVVGTGLER,HYAH<br>TDCPGHADYVK,GEETPVVGSALC<br>ALEQR                                                                                                                                    |
| IPI00622968.1 | Gm9819 |        | hypothetical protein                                                | EHPWEVMPDLYFYR,AIVAIENPADVS<br>VISSR,FTPGFTFNQIQAAFR,FLAAGTH<br>LGGTNLDFQMEQYIYK,SDGIYIINLK               | YVDIAIPCNNK,FAAATGATPIAGR<br>,DPEEIEKEEQAAAEK,KSDGIYIIN<br>LK,FTPGFTFNQIQAAFR,AIVAIEN<br>PADVSVISSR,GAHSVGLMWWML<br>AR,FLAAGTHLGGTNLDFQMEQYI<br>YK,LLVVTDPDR,ADHQPLTEASYV<br>NLPTIALCNTDSPLR,SDGIYIINLK                                                                                       | YVDIAIPCNNK,FAAATGATPIAGR,E<br>HPWEVMPDLYFYR,FTPGFTFNQIQ<br>AAFR,AIVAIENPADVSVISSR,LLVVT<br>DPR,ADHQPLTEASYVNLPTIALCNT<br>DSPLR                                                                                                  |
| IPI00340165.5 | Gm9824 |        | 21 kDa protein                                                      | LYTLVLTDPNAPSR,VDYAGVTVDELG<br>K,VLTPQVMNRPSSISWDGLDPGK,G<br>NDISSGTVLSDYVVGSGPPSGTGLHR,P<br>SSISWDGLDPGK |                                                                                                                                                                                                                                                                                               | VDYAGVTVDELGK,LYEQLSGK,GN<br>DISSGTVLSDYVVGSGPPSGTGLHR,<br>PSSISWDGLDPGK                                                                                                                                                         |
| IPI00173160.3 | Q6ZWU9 | Gm9846 | 40S ribosomal protein S27                                           | LVQSPNSYFMDVK,DLLHPSPEEEK                                                                                 | LVQSPNSYFMDVK,DLLHPSPEE<br>EK,LTEGCSFR,DLLHPSPEEEKR                                                                                                                                                                                                                                           | DLLHPSPEEEK,LTEGCSFR,ITTVFS<br>HAQTVVLCVGCSTVLCQPTGGK                                                                                                                                                                            |
| IPI00624984.1 | Gm9923 |        | similar to Hbs11 protein                                            | GYNYDEDFEDDDLYGQSVEDDYCISP<br>STAAQFIYSR,DLENLSLSDLIAK,ESSN<br>SLLNHQLSEIDQAR                             |                                                                                                                                                                                                                                                                                               |                                                                                                                                                                                                                                  |
| IPI00351252.4 | Q3THK7 | Gmps   | GMP synthase [glutamine-hydrolyzing]                                |                                                                                                           | DGSHHYEGAVVILDAGAQQYQK,D<br>EPDWESLIFLAR,IVADFSASVK,E<br>LFVQSEIFPLETPAFAIK,IANEVIG<br>EMSLKPEEVFLAQGTLRPDLIESA<br>SLVASGK,VLVLLSGGVDSTVCTA<br>LLNR                                                                                                                                           | TFITSDFMTGVPATPGNEIPVEVVLK<br>,THHNDTELIR,EPPTDVTPFTTGV<br>LSTLR,VFGGTVHK,KPHTLQQR,LM<br>QITSLHSLNAFLLPK                                                                                                                         |
| IPI00652902.1 | Q3TXK7 | Gnai2  | Putative uncharacterized protein                                    |                                                                                                           | NVQFVFDAVTDVVIK,IAQSDYIPT<br>QQDVLR                                                                                                                                                                                                                                                           |                                                                                                                                                                                                                                  |
| IPI00120716.3 | P62874 | Gnb1   | Guanine nucleotide-binding protein<br>G(I)/G(S)/G(T) subunit beta-1 |                                                                                                           | LIIWDSYTTNK,LLVSASQDGK,LLL<br>AGYDDFNCNVWDALK                                                                                                                                                                                                                                                 | LLVSASQDGK,VHAIPLR,ACADATL<br>SQITNNIDPVGR,LFVSGACDASAK                                                                                                                                                                          |
| IPI00317740.5 | P68040 | Gnb211 | Guanine nucleotide-binding protein<br>subunit beta-2-like 1         | GHNGWVTQIATTPQFPDMILSASR,VD<br>ELK,IIVDELKQEVISTSSK                                                       | GHNGWVTQIATTPQFPDMILSAS<br>R,AEPPQCTSLAWSADGQTLFAG<br>YTDNLVR,FSPNSSNPIIVSCGWD<br>K,LWDLTTGTTR,YTVQDESHSE<br>WVSCVR,IIVDELKQEVISTSSK,D<br>VLSVAFSSDNR,DETNYGIPQR,Y<br>WLCAATGPSIK,VWQVTIGTR,HL<br>YTLGGDIINALCFSPNR,VWNLA<br>NCK,IIVDELK,TNHIGHTGYLNTVT<br>VSPDGLCASGGK,IWDLEGK,LW<br>NTLGVCK | GHNGWVTQIATTPQFPDMILSASR,<br>AEPPQCTSLAWSADGQTLFAGYTD<br>NLVR,FSPNSSNPIIVSCGWDK,LWD<br>LTTGTTR,YTVQDESHSEWVSCVR<br>,DETNYGIPQR,YWLCAATGPSIK,V<br>WQVTIGTR,QEVISTSSK,IIVDELK,T<br>NHIGHTGYLNTVTVSPDGLCASG<br>GK,LWNTLGVCK,IWDLEGK |
| IPI00116898.3 | Q99LH1 | Gnl2   | Nucleolar GTP-binding protein 2                                     | IESWENAEDFLEK,VIDSSDVVVQVLD<br>AR,VIKPLQYQSTVASGTVAR                                                      |                                                                                                                                                                                                                                                                                               |                                                                                                                                                                                                                                  |



|                |        |        |                                                        |                                                                                                                                                                                                                                |                                                                                                                                                                                                                                                                                                                                    |
|----------------|--------|--------|--------------------------------------------------------|--------------------------------------------------------------------------------------------------------------------------------------------------------------------------------------------------------------------------------|------------------------------------------------------------------------------------------------------------------------------------------------------------------------------------------------------------------------------------------------------------------------------------------------------------------------------------|
| IPI00222461.4  | Q8CI11 | Gnl3   | Isoform 1 of Guanine nucleotide-binding protein-like 3 | ENLENWLNLYLNK,DPLGCRCPQIEEAV<br>IQSGSK,GFNLEEEK,KDPGVPNSAPF<br>KEALLR,SPASIEELRPLEAASAILSQA<br>DNEQVVLK,DIQVGVIGFPNVGK,NAEI<br>SDVAPVEETR,DIQVGVIGFPNVGKSS<br>VINSLK,SSGLTNGILDEKDIVEESPR,VI<br>EASDIVLEVLDAR,KVIEASDIVLEVLDAR | SPASIEELRPLEAASAILSQADNE<br>QVVLK,KLEVSPGDEQSNVETR,LI<br>LVLNK,VIEASDIVLEVLDAR                                                                                                                                                                                                                                                     |
| IPI00108818.3  | Q6PGG6 | Gnl3l  | Guanine nucleotide-binding protein-like 3-like protein | LADPVTPTVETILQR,ILETDPQQGQAL<br>ASALK                                                                                                                                                                                          |                                                                                                                                                                                                                                                                                                                                    |
| IPI00126660.1  | P98192 | Gnpat  | Dihydroxyacetone phosphate acyltransferase             |                                                                                                                                                                                                                                | LGVVEKK,VCVNEEGIQK                                                                                                                                                                                                                                                                                                                 |
| IPI00654934.10 | B2RWW2 | Golgb1 | Golgb1 protein                                         | ILELEEEENDR,ELENLLSQEEEEENVALE<br>EENK,AMTSLQNER,DAYHHLQGGQFHE<br>QNKEKENIADQLR                                                                                                                                                | TAAEEELQAVVQR,AASVEAQAH<br>TELLK,RQLEER                                                                                                                                                                                                                                                                                            |
| IPI00128905.1  | Q91XA2 | Golm1  | Golgi membrane protein 1                               | LQEEVPSEEQMPQEK,QSHILNQVGIH<br>IPQQA                                                                                                                                                                                           |                                                                                                                                                                                                                                                                                                                                    |
| IPI00133212.1  | Q9CR60 | Golt1b | Vesicle transport protein GOT1B                        |                                                                                                                                                                                                                                | VPVLGSLNLPGIR,RVPVLGSLNLP<br>GIR                                                                                                                                                                                                                                                                                                   |
| IPI00117312.1  | P05202 | Got2   | Aspartate aminotransferase, mitochondrial              |                                                                                                                                                                                                                                | TCGFDFSGALEDISK,ISVAGVTSGN<br>TCGFDFSGALEDISK,TQLVSNLK,<br>VGYLAHAIHQVTK,FVTVQTISGTGA<br>FVTVQTISGTGALR,KAEAQIAAK,I<br>LR,ILIRPLYSNPPLNGAR,IAATILTS<br>AATILTSPDLR,ASAELALGENNEV<br>PDLR,ASAELALGENNEVLK,VGASFL<br>LQ,PSWGNHTPIFR,VGAFTVVCK,<br>EYLPIGGLAEFCK                                                                      |
| IPI00876084.1  | Q64521 | Gpd2   | Glycerol-3-phosphate dehydrogenase, mitochondrial      |                                                                                                                                                                                                                                | FHNLNAGPSR,VIFFLPWEK,LVG<br>AIVYYDGQHNDAR,ALEHFPMQ<br>K,LVQDYGLESEVAQHLAK,GFITI<br>VDVQR,NHVVDISDSGLITIAGGK,<br>RVPIPVDR,DKLVGAIVYYDGQHN<br>DAR,TVGLFLQGGK,FEDEKGF<br>TIVDVQR,YGAATANYMEVVSLLK<br>,VLESINVQMDENTLHEILCEVDLN<br>K,KQEELETATR,LVSEFPYIEAEV<br>K,LAFLNVQAAEEALPR,ANLLEIA<br>PHLSAPLPIMLPYK,MNLAIALTA<br>AR,NYLSSDVEVR |
| IPI00228633.7  | P06745 | Gpi1   | Glucose-6-phosphate isomerase                          | VWFVSNIDGTHIAK,EVMQMLVELAK,T<br>FTTQETITNAETAK                                                                                                                                                                                 | SPEDLEK,HFVALSTNTAK,SITDII<br>NIGIGGSDLGPLMVTEALKPYSK,I<br>LLANFLAQTEALMK,FNNFSLNLN<br>TNHGHLVDYSK,VWFVSNIDGTH<br>IAK,AVLHVALR,VFEGNRPNTSIV<br>FTK,EVMQMLVELAK,TLASLSPET<br>SLFIIASK,TFTTQETITNAETAK                                                                                                                               |
| IPI00357027.6  |        | Gpr161 | G protein-coupled receptor 161                         |                                                                                                                                                                                                                                | SSVTFEDEVQIK,GALTMNSLSSLS<br>YRK                                                                                                                                                                                                                                                                                                   |

|               |        |         |                                                               |                                                                                        |                                                                                                                                     |
|---------------|--------|---------|---------------------------------------------------------------|----------------------------------------------------------------------------------------|-------------------------------------------------------------------------------------------------------------------------------------|
| IPI00319652.2 | P11352 | Gpx1    | Glutathione peroxidase 1                                      | YVRPGGGFEPNFTLFEK,TIDIEPDIETL<br>LSQQSGNS,PGGGFEPNFTLFEK,FRTI<br>DIEPDIETLLSQQSGNS     |                                                                                                                                     |
| IPI00119058.1 | Q60631 | Grb2    | Isoform 1 of Growth factor receptor-bound protein 2           | FNSLNELVDYHR,YFLWVVK                                                                   |                                                                                                                                     |
| IPI00466976.4 | Q6P6I6 | Grin1a  | Isoform 1 of Protein GRINL1A                                  | ITIADQSEPSEENTSTENFPELQSETP<br>K,GNEETLEAGYTVNSSPAAHIR                                 |                                                                                                                                     |
| IPI00775775.1 | A2AEW8 | Gripap1 | Gripap1 protein                                               | KAQEVEVLLSENEMLQAK,VMLDELA<br>METLQEK,EAVRPSAVGEGQGDPGGD<br>VLPTPLAPMPLAEVELK          |                                                                                                                                     |
| IPI00111240.5 | P47743 | Grm8    | Metabotropic glutamate receptor 8                             |                                                                                        | EIGGVCIAQSQK,GVPCGDLK                                                                                                               |
| IPI00117083.1 | Q99LP6 | Grpel1  | GrpE protein homolog 1, mitochondrial                         |                                                                                        | ALADTENLR,DLLEVADILEK,TLR<br>PALVGVVK                                                                                               |
| IPI00117167.2 | P13020 | Gsn     | Isoform 1 of Gelsolin                                         | VPFDAATLHTSTAMAAQHGMDDDG<br>T<br>GQK,QTQVSVLPEGGETPLFK                                 |                                                                                                                                     |
| IPI00230355.1 | Q8K2E1 | Gspt1   | G1 to S phase transition 1                                    |                                                                                        | GIEEEEILPGFILCDLNNLCHSGR,<br>TFDAQIVIIIEHK,KEHVNVVFIGHV<br>DAGK,HLIVLINK,EQSDFCPWYIG<br>LPIFIPYLDNLPNFNRR,PFVNVHA<br>AEFVPSFLR<br>K |
| IPI00111359.2 | P47791 | Gsr     | Isoform Mitochondrial of Glutathione reductase, mitochondrial | SHIEIHHGYATFADGPRPTVEVNGK,AD<br>FDNTVAIHPTSSEELVTLR,LDYDNIPT<br>VVFHSHPPIGTVGLTEDEAVHK | KTSSGLELQVVTVPGR,ALLTPVAI<br>AAGR,TSSGLELQVVTVPGR,LD<br>YDNIPTVVFHSHPPIGTVGLTEDEAV<br>HK                                            |
| IPI00323911.3 | P24472 | Gsta4   | Glutathione S-transferase A4                                  |                                                                                        | FLQPGSQR,YNLYGK,EKEESYDLI<br>LSR,DGHLLFGQVPLVEIDGMMLT<br>QTR,KPPPDGPYVEVVR,AILSYLA<br>AK                                            |
| IPI00555023.2 | P19157 | Gstp1   | Glutathione S-transferase P 1                                 |                                                                                        | YVTLIYTNYENGK,ALPGHLKPFET<br>LLSQNQGGK,FEDGDLTLYQSNAI<br>LR                                                                         |
| IPI00121198.2 | Q99PM3 | Gtf2a1  | Transcription initiation factor IIA subunit 1                 | SVIEDVINDVR,DIFLDDGVDEQVLMEL<br>K                                                      |                                                                                                                                     |
| IPI00331112.4 | Q9D902 | Gtf2e2  | General transcription factor IIE subunit 2                    | GDTHPLTLEEILDETQHLDIGLK,GLGGI<br>LLEDIEEGLPNSQK,ALSGSSGYK,IEV<br>VDGK                  | RQGISSMQESGPK,THNEHLAGVLK                                                                                                           |
| IPI00135812.2 | Q8R0A0 | Gtf2f2  | General transcription factor IIF subunit 2                    | TEVSFTLNEDLANIHDIGGK,QHVLDML<br>FSAFEK,EHPFVLQSVGGQTLTVFTES<br>SSDK                    |                                                                                                                                     |
| IPI00113686.2 | Q9ESZ8 | Gtf2i   | Isoform 1 of General transcription factor II-I                | VPEIEVTVEGPNSSPQTS AVR,KMVD<br>QLFCKK,FAQALGLTEAVK,FGEAIGMG<br>FPVK,MSVDAVEIETLR       | GPVTIPYPLFQSHVEDLYVEGLPE<br>GIPFR,VPYPVFESNPEFLYVEGL<br>PEGIPFR                                                                     |
| IPI00310646.5 | Q8BTU1 | Gti3    | Isoform 1 of UPF0468 protein C16orf80 homolog                 | NTFQSGFLSILYSIGSK,YFTFEVQVLD<br>DK,LPFLVMIK                                            |                                                                                                                                     |
| IPI00761677.1 | O08582 | Gtpbp1  | GTP-binding protein 1                                         | DDVIVTASNFSER,MFLNLLSPR,LVL<br>VSPTSEQYDSSLR,STLLGVLTHGELD<br>NGR                      |                                                                                                                                     |

|               |        |        |                                                      |                                                                                                                                                                                                                                              |                                                                                                                                                                                                                                                                                                                                                                                                  |                                                                                                                                       |
|---------------|--------|--------|------------------------------------------------------|----------------------------------------------------------------------------------------------------------------------------------------------------------------------------------------------------------------------------------------------|--------------------------------------------------------------------------------------------------------------------------------------------------------------------------------------------------------------------------------------------------------------------------------------------------------------------------------------------------------------------------------------------------|---------------------------------------------------------------------------------------------------------------------------------------|
| IPI00117642.3 | Q99ME9 | Gtpbp4 | Nucleolar GTP-binding protein 1                      | DFIDLTLISK,SLGVDMDKNNAHYAVQ<br>AR,EQLELFQNIAR,LHLAVPNK,ERPPFI<br>PEGVIAR,LALGQINIAR,ERDLELEMGD<br>DYILDQK,NTIEMQAITALHLR,LSQIL<br>SDFPK,PPFIPEGVIARR,ADVVDVQPYA<br>FTTK,DDKERPPFIPEGVIAR,YWDLMN<br>SSEK,WQVVDTPGILDHPLEDR,PLFIN<br>KPLIVVANK | LALGQINIAR,KLEELEKEEELR,IFL<br>DLQAEFGPVIETSTLTEEVIQVK                                                                                                                                                                                                                                                                                                                                           | LALGQINIAR,FTQQNYHDR,MCTIIR,<br>TLLCGYPNVGK,LSQILSDFPK,HFY<br>MR,WQVVDTPGILDHPLEDR                                                    |
| IPI00268247.4 | Q8R080 | Gtse1  | G2 and S phase-expressed protein 1                   | EDFLLLEDEK,VPTLSPLTQQPQTPEQ<br>R,TLLKPPGYTGNLTR,VPQFSVGESP<br>GGVTPK                                                                                                                                                                         |                                                                                                                                                                                                                                                                                                                                                                                                  | LDQLTITPEAGGR,LSSLPLMAPQS<br>MPR,AELGQLIDLGSPLIQLSPEADK                                                                               |
| IPI00228828.5 | Q564G0 | Guk1   | guanylate kinase 1 isoform 1                         | TDMESSKEPGLFDLVIINDDLK,NPRP<br>GEEDGKDYFVTR,EPGLFDLVIINDDL<br>DK,DIAAGDFIEHAEFSGNLYGTSK                                                                                                                                                      |                                                                                                                                                                                                                                                                                                                                                                                                  |                                                                                                                                       |
| IPI00118590.1 | Q80ZM5 | H1fx   | H1 histone family, member X                          | RGASAASSPAPK,ALVQNDTLLQVK,A<br>GGSAAPTQPK,YSQLVVETIR                                                                                                                                                                                         |                                                                                                                                                                                                                                                                                                                                                                                                  |                                                                                                                                       |
| IPI00555055.3 | Q5NC92 | H2afv  | 14 kDa protein                                       | GDEELDSLIIK,AGLQFPVGR,HLQLAIR,<br>HLQLAIRGDEELDSLIIK,ATIAGGGVIPH<br>IHK                                                                                                                                                                      | GDEELDSLIIK,AGLQFPVGR,HLQL<br>AIR,VGATAAVYSAAILEYLTAEVL<br>ELAGNASK,ATIAGGGVIPHIIK                                                                                                                                                                                                                                                                                                               | GDEELDSLIIK,AGLQFPVGR,HLQLAI<br>R,VGATAAVYSAAILEYLTAEVLELA<br>GNASK,ATIAGGGVIPHIIK                                                    |
| IPI00230264.5 | P27661 | H2afx  | Histone H2A.x                                        | AGLQFPVGR,NDEELNK,HLQLAIR,VTI<br>AQGGVLPNIQAVLLPK,LLGGVTIAQGG<br>GVLVLPNIQAVLLPK,VTIAQGGVLPNIQA<br>VLLPKK,HLQLAIRNDEELNK                                                                                                                     | AGLQFPVGR,NDEELNK,VTIAQGG<br>GVLVLPNIQAVLLPK,HLQLAIR,LLG<br>GVTIAQGGVLPNIQAVLLPK,VGA<br>GAPVYLAHVLEYLEYLTAEILELAGNA<br>AR,VGAGAPVYLAHVLEYLEYLTAEILE<br>LAGNAARDNKK                                                                                                                                                                                                                               | AGLQFPVGR,HLQLAIR,VTIAQGGV<br>LPNIQAVLLPK,LLGGVTIAQGGVLP<br>NIQAVLLPK,VGAGAPVYLAHVLEYLE<br>TAEILELAGNAAR,LLGGVTIAQGGV<br>LPNIQAVLLPKK |
| IPI00378480.1 | Q9QZQ8 | H2afy  | Isoform 2 of Core histone macro-H2A.1                |                                                                                                                                                                                                                                              | HILLAVANDEELNQLLK,EFVEAVL<br>ELR,IGVGAPVYMAAVLEYLEYLTAEIL<br>ELAGNAAR                                                                                                                                                                                                                                                                                                                            | SIAFPSIGSGR,GVTIASGGVLPNIHP<br>ELLA                                                                                                   |
| IPI00223092.5 | Q8BMS1 | Hadha  | Trifunctional enzyme subunit alpha,<br>mitochondrial |                                                                                                                                                                                                                                              | DSIFSNLIGQLDYK,ADMVIEAVFE<br>DLGVK,DTTASAVAVGLR,TVLGV<br>PEVLLGILPGAGGTQR,THINYG<br>V,K,ILQEGVDPK,FGELALTK,EVQS<br>EFIEVMNEIWANDQIR,KLDALTTG<br>LDALTTGFGFPVGAATLADEVGV<br>FGFPVGAATLADEVGVDAQHVAAQ<br>EDLGK,LDALTTGFGFPVGAATLA<br>AGGTQR,THINYGK,LPKPEVSSD<br>DEVGVDAQHVAAEDLGK,AGLEQ<br>EDVQYR<br>GSDAGYLAESQK,MQLLEIITTDK,<br>TIEYLEEVAVNFAK,NVQQLAILGA<br>GLMGAGIAQVSVDK,LPKPEVSS<br>DEDVQYR |                                                                                                                                       |
| IPI00115607.3 | Q99JY0 | Hadhb  | Trifunctional enzyme subunit beta,<br>mitochondrial  |                                                                                                                                                                                                                                              | NIVVVEGVR,LAAAFVSR                                                                                                                                                                                                                                                                                                                                                                               |                                                                                                                                       |

|               |        |       |                                |                                                                                                                                                                                                       |                                                                                                                         |
|---------------|--------|-------|--------------------------------|-------------------------------------------------------------------------------------------------------------------------------------------------------------------------------------------------------|-------------------------------------------------------------------------------------------------------------------------|
| IPI00226930.2 | A2ATU9 | Hat1  | Histone aminotransferase 1     | FQELVEDYRR,ETNFKPFGTLLHT<br>YTVPSQTGGGETFTFQIHK,ILLYYIA<br>GSLSTLFR,LLVTDMSDAEQYR                                                                                                                     | QIIPPGFCTNTNDFLSLLEK,FCQFLP<br>SFSR,FLVEYK                                                                              |
| IPI00556802.1 | Q69ZS7 | Hbs11 | Isoform 1 of HBS1-like protein | GYNYDEDFEDDDLYGQSVEDDYCISP<br>STAAQFIYSR,QLLNLVVIGHVDAGK,E<br>SSNSLLNHQLSEIDQAR,GPPGDDVSV<br>ASPNIPETGTPK                                                                                             |                                                                                                                         |
| IPI00828490.2 | B1AUX2 | Hcfc1 | Host cell factor C1            | MYVFGGWVPLVMDDVK,VTGPQATTG<br>TPLVTMRPASQAGK,SPDGAHLTWEF<br>PSVTSKG,YLNDLYILELR,YDIPATAAT<br>ATSPTPNPVPSPANPPK,YSNDLYEL<br>QASR                                                                       |                                                                                                                         |
| IPI00114232.1 | O09106 | Hdac1 | Histone deacetylase 1          | DGIDDESIEAIFK,QQTDIAVNWAGGL<br>HHAK,YGEYFPGTGDLR,MTHNLLLNY<br>GLYR,YYAVNYPLR,LHISPSNMTNQNT<br>NEYLEK                                                                                                  | YGEYFPGTGDLR,LGCFNLTIK                                                                                                  |
| IPI00896654.1 | B2RRP3 | Hdac2 | histone deacetylase 2          | YYAVNFPMPR,DGIDDESYGQIFKPIISK,<br>LHISPSNMTNQNTPEYMEK,YGEYFPG<br>TGDLR,DGIDDESYGQIFK,MTHNLLL<br>YGLYR                                                                                                 |                                                                                                                         |
| IPI00137694.5 | Q3SXD3 | Hdc2  | HD domain-containing protein 2 | QITQLLPEDLR,FSHPEIVQLVSELETE<br>R                                                                                                                                                                     |                                                                                                                         |
| IPI00313817.1 | P51859 | Hdgf  | Hepatoma-derived growth factor | KGFSEGLWEIENNPTVK,YQVFFFGTH<br>ETAFLGPK,ESGDHEEEDKEIAALEGE<br>RPLPVEVEK,GFSEGLWEIENNPTVK,<br>NSTPSEPDSGQGPPAEEEEGEEAAK<br>EEAEAQGVV,EIAALEGERPLPVEVEK,<br>NSTPSEPDSGQGPPAEEEEGEEAAK                   |                                                                                                                         |
| IPI00123379.1 | Q8VDJ3 | Hdlbp | Vigilin                        | MVADLVENSYSISVPIFK,GNSLQEILE<br>R,EALEALVPVTIEVEVPFDLHR,IVGEL<br>EQMVSEDVPLDHR,FPDREENPVHSV<br>EPSIQENGDEAGEGR,DKFPEVIINFPD<br>PAQK,EENPVHVSVEPSIQENGDEAGE<br>GR,LVGEIMQETGTR,IDLPAENSNSSET<br>IIITGK | TTTIAVEVK,IEGDPQGVQQAQ,AS<br>VITQVFHVPLEER,EALEALVPVTI<br>EVEVPFDLHR,GAVITQIR,HEVLLI<br>SAEQDKR,IIFPAAEDKDQDLITIIG<br>K |

|               |        |               |                                                         |                                                                                                                                                                                                                                                                                                                                                                                                                                                                                        |                                                                                                                                                                                                                                |
|---------------|--------|---------------|---------------------------------------------------------|----------------------------------------------------------------------------------------------------------------------------------------------------------------------------------------------------------------------------------------------------------------------------------------------------------------------------------------------------------------------------------------------------------------------------------------------------------------------------------------|--------------------------------------------------------------------------------------------------------------------------------------------------------------------------------------------------------------------------------|
| IPI00411022.1 | Heatr1 | BAP28 protein |                                                         | SLHGLEQGLLETVLSYINTVAQSM<br>EK,NHLEEILK,LVPVLLAIVQHK,L<br>DDAYSFQVISK,VLELAANILIK,IIG<br>VFVDALPHVPEHR,ALDAVLEEHL<br>K,DLGFMDFICSLVTR,EELLSHQSS<br>QLTTFFLEALDFR,LLTFYNLADCI<br>AEK,FAALITVLALAEK,LVEDLVCA<br>GEK,GLVGNPLPSVR,YVQELHGA<br>QR,TLATELSPR,VLQGVNSEMVL<br>AQLLPMVEQLLEK,TVLVAAYGEK<br>,VPSQVNDGLGCLILLQR,VNALL<br>PTETFISVIR,VVETLPHFISPYLEG<br>LLTQVIHLEK,GISVDAEQIR,AATY<br>MIICQISVK,SLGTIQQTR,VTLILEL<br>LQHK,FELVIDHLIPK,KVVGSGGP<br>K,AEEITSDATYVLQDLATLFDLQ<br>NEEK | IIGVFVDALPHVPEHR,SGICSLHPLL<br>R,DTAFAIGCTGLEELLGIDPAFEQF<br>EAPLFSQLAK,RAAVQCLQALR,NVL<br>GSALLCIAEVTSTLEALAIPLPSLM<br>PSLLTAMK,LALPQTDPSSLR,QLIL<br>SCLLNICQK,LLTFYNLADCIAEK,HS<br>GVPLAR,EPTAVLK,KVVGSGGPK,G<br>LVGNPLPSVRR |
| IPI00399686.1 | Q8BQM4 | Heatr3        | HEAT repeat-containing protein 3                        |                                                                                                                                                                                                                                                                                                                                                                                                                                                                                        | LGPLLLDSSLAVR,VNVVSILGITGSV<br>LAK,NLSACGGFDVCDMMVAK,NIP<br>QCMTPEQLMTLCR                                                                                                                                                      |
| IPI00121431.4 | Q60848 | Hells         | Isoform 1 of Lymphocyte-specific helicase               | LISQIQPEVNR,FLILDR,LVTANTID<br>QK                                                                                                                                                                                                                                                                                                                                                                                                                                                      | GVPGPFLVCGPLSTLPNWMAEFKR<br>,HFTGGVMR,TVVEGNIPIESEVNLK,<br>GVPGPFLVCGPLSTLPNWMAEFK                                                                                                                                             |
| IPI00314989.2 | Q4U2R1 | Herc2         | Isoform 1 of Probable E3 ubiquitin-protein ligase HERC2 |                                                                                                                                                                                                                                                                                                                                                                                                                                                                                        | LLLCCLLK,DVPHTESDMHLLSGPLS<br>PNESFLR,RQSPAPALPIVVQLMEM<br>GFPR,VAVALDKR,SAKPAFAGQVD<br>LDLLR,YYANVIGPIQCEGLASLGM<br>QVACA EK                                                                                                  |
| IPI00649267.4 | Q3UMA3 | Hgs           | Putative uncharacterized protein                        | RDETALQEEEEELQALALASQSEAE EK,<br>NKILYLIQAWAHA FR,ILYLIQAWAHA FR<br>,NPHVALYALEVMESVVK                                                                                                                                                                                                                                                                                                                                                                                                 |                                                                                                                                                                                                                                |
| IPI00108189.4 | P70349 | Hint1         | Histidine triad nucleotide-binding protein 1            | HISQISVADDDDESLLGHLMIVGK,MVV<br>NEGADGGQSVYHIHLVHLGGR,KHISQ<br>ISVADDDDESLLGHLMIVGK                                                                                                                                                                                                                                                                                                                                                                                                    | CLAFHDISPQAPTHFLVIPK,AQVAQ<br>PGGDTIFGK                                                                                                                                                                                        |
| IPI00311726.3 | Q9JKY5 | Hip1r         | Huntingtin-interacting protein 1-related protein        |                                                                                                                                                                                                                                                                                                                                                                                                                                                                                        | QHYVLAGGMGTPSEEEPSRSPAP<br>R,ILNSCTDLMK                                                                                                                                                                                        |
| IPI00228616.5 | P43275 | Hist1h1a      | Histone H1.1                                            | SLAAAGYDVEK,SGVSLAALK,PAGPS<br>VSELIVQAVSSSK,KPAGPSVSELIVQA<br>VSSSK,KKPAGPSVSELIVQAVSSSK                                                                                                                                                                                                                                                                                                                                                                                              | SLAAAGYDVEK,SGVSLAALK,KP<br>AGPSVSELIVQAVSSSK,KKPAGP<br>SVSELIVQAVSSSK,SGVSLAALK<br>K                                                                                                                                          |
| IPI00230133.5 | P43276 | Hist1h1b      | Histone H1.5                                            | ALAAGGYDVEK,KATGPPVSELITK,AK<br>KPAAGVK                                                                                                                                                                                                                                                                                                                                                                                                                                                | GGVSLPALK,ALAAGGYDVEK,GT<br>GASGSFKLNKK,KPAGATPK,KAL<br>AAGGYDVEK,SLVSKGTLVQTK,A<br>LAAGGYDVEKNNSR,KATGPPVS<br>ELITK,ATGPPVSELITK                                                                                              |

|               |          |           |                                   |                                                                                                                          |                                                                                                                                                                 |                                                                           |
|---------------|----------|-----------|-----------------------------------|--------------------------------------------------------------------------------------------------------------------------|-----------------------------------------------------------------------------------------------------------------------------------------------------------------|---------------------------------------------------------------------------|
| IPI00223713.5 | P15864   | Hist1h1c  | Histone H1.2                      | SGVSLAALK,ASGPPVSELITK,KALAAAGYDVEK,KASGPPVSELITK,KPAAAAVTK,SGVSLAALKKALAAAGYDVEK,GI<br>LVQTK,ALAAAGYDVEK                | SGVSLAALK,ASGPPVSELITK,KALAAAGYDVEK,GI<br>SGPPVSELITK,ALAAAGYDVEK                                                                                               | KATGAATPK,SGVSLAALK,ASGPPVSELITK,GTGASGSFK,ALAAAGYDVEK                    |
| IPI00331597.6 | P43277   | Hist1h1d  | Histone H1.3                      | SGVSLAALK,ASGPPVSELITK,KASGPPVSELITK,KALAAAGYDVEK,ALAAAGYDVEK,SGVSLAALKKALAAAGYDVEK                                      | GTGASGSFKLNKK,SGVSLAALK,ASGPPVSELITK,SGVSLAALKK,KALAAAGYDVEK,KASGPPVSELITK,SLVSKGTLVQTK,ALAAAGYDVEKNNSR,ALAAAGYDVEK                                             | KATGAATPK,SGVSLAALK,ASGPPVSELITK,GTGASGSFK,ALAAAGYDVEK                    |
| IPI00223714.5 | P43274   | Hist1h1e  | Histone H1.4                      | SGVSLAALK,KALAAAGYDVEK,KTSGPPVSELITK,ALAAAGYDVEK,SGVSLAALKKALAAAGYDVEK                                                   | TSGPPVSELITK,GTGASGSFKLNKK,SGVSLAALK,SGVSLAALKK,KALAAAGYDVEK,SLVSKGTLVQTK,ALAAAGYDVEKNNSR,ALAAAGYDVEK                                                           | SGVSLAALK,TSGPPVSELITK,GTGASGSFK,ALAAAGYDVEK                              |
| IPI00229542.1 | Q8CGP4   | Hist1h2aa | Histone H2A                       | AGLQFPVGR,NDEELNK,VTIAQGGVLPNIQAVLLPK,HLQLAIR,VTIAQGGVLPNIQAVLLPKK,NDEELNKLLGR,HLQLAIRNDEELNK,HLQLAIRNDEELNKLLGR         |                                                                                                                                                                 | AGLQFPVGR,HLQLAIR,VTIAQGGVLPNIQAVLLPK,IGAGAPVYLAADVLETAEVLELAGNAAR        |
| IPI00229543.3 | Q8CGP5   | Hist1h2af | Histone H2A type 1-F              | AGLQFPVGR,NDEELNK,HLQLAIR,VTIAQGGVLPNIQAVLLPK,VTIAQGGVLPNIQAVLLPKK,NDEELNKLLGR,HLQLAIRNDEELNK,HLQLAIRNDEELNKLLGR         |                                                                                                                                                                 |                                                                           |
| IPI00111957.3 | P70696   | Hist1h2ba | Histone H2B type 1-A              | STITSREIQTAVRLLLLPGELAK,LAHYNK,IASEASR,HAVSEGTK,QVHPDTGISSK,EIQTAVR,EIQTAVRLLLLPGELAK,LAHYNKR,AMSIMNSFVTDIFER,LLLLPGELAK | STITSREIQTAVRLLLLPGELAK,HA<br>VSEGKAVTK,VLKQVHPDTGISSK,QVHPDTGISSK,IASEASRLAHYNKR,KESYSIYIK,EIQTAVR,EIQTAVRLLLLPGELAK,STITSREIQTAVR,HAVSEGKAVTKYTSSK,LLLLPGELAK |                                                                           |
| IPI00761713.2 | Q8CGP2-2 | Hist1h2bp | Isoform 2 of Histone H2B type 1-P | STITSREIQTAVRLLLLPGELAK,LAHYNK,HAVSEGTK,IASEASR,QVHPDTGISSK,AMGIMNSFVNDIFER,EIQTAVRLLLLPGELAK,EIQTAVR,LAHYNKR,LLLLPGELAK | QVHPDTGISSK,AMGIMNSFVNDIFER                                                                                                                                     | AMGIMNSFVNDIFER,QVHPDTGISSK,KESYSVYVYK,ESYSVYVYK,EIQTAVR,LLLLPGELAK       |
| IPI00459318.1 | Q8C622   | Hist1h2bp | Putative uncharacterized protein  | LAHYNK,KESYSVYVYK,LAHYNKR                                                                                                | KESYSVYVYK,ESYSVYVYK,SRKESYSVYVYK,ATGIMNSFVNDIFER                                                                                                               |                                                                           |
| IPI00553538.3 | P68433   | Hist1h3a  | Histone H3.1                      |                                                                                                                          | YRPGTVALR,FQSSAVMALQEACEAYLVGLFEDTNLCAIHAK,EIAQDFK,RVTIMPK,STELLIR,KLPFQR                                                                                       | YRPGTVALR,FQSSAVMALQEACEAYLVGLFEDTNLCAIHAK,EIAQDFK,RVTIMPK,STELLIR,KLPFQR |

|               |        |            |                                                          |                                                                                                                              |                                                                                                                                                                                                                        |                                                                                                                                                                                                                     |
|---------------|--------|------------|----------------------------------------------------------|------------------------------------------------------------------------------------------------------------------------------|------------------------------------------------------------------------------------------------------------------------------------------------------------------------------------------------------------------------|---------------------------------------------------------------------------------------------------------------------------------------------------------------------------------------------------------------------|
| IPI00330000.4 | Q6GSS7 | Hist2h2aa2 | Histone H2A type 2-A                                     | AGLQFPVGR,HLQLAIR,VTIAQGGVLP<br>NIQAVLLPK,NDEELNK,VTIAQGGVLP<br>NIQAVLLPKK,HLQLAIRNDEELNK,VG<br>AGAPVYMAAVLEYLTAEILELAGNAAR  | AGLQFPVGR,HLQLAIR,VTIAQGG<br>VLPNIQAVLLPK,NDEELNK,VGAG<br>APVYMAAVLEYLTAEILELAGNA<br>R                                                                                                                                 |                                                                                                                                                                                                                     |
| IPI00623951.3 | Q64522 | Hist2h2ab  | Histone H2A type 2-B                                     | AGLQFPVGR,NDEELNK,VTIAQGGVL<br>PNIQAVLLPK,LLGGVTIAQGGVLPNIQ<br>AVLLPK,VTIAQGGVLPNIQAVLLPKK,V<br>GAGAPVYMAAVLEYLTAEILELAGNAAR | AGLQFPVGR,NDEELNK,VTIAQGG<br>VLPNIQAVLLPK,LLGGVTIAQGG<br>VLPNIQAVLLPK,VGAGAPVYMA<br>AVLEYLTAEILELAGNAAR                                                                                                                | AGLQFPVGR,VTIAQGGVLPNIQAVL<br>LPK,LLGGVTIAQGGVLPNIQAVLLP<br>K,HLQLAVR,LLGGVTIAQGGVLPNI<br>QAVLLPKK,VGAGAPVYMAAVLEYLT<br>AEILELAGNAAR                                                                                |
| IPI00379693.1 |        | Hist2h3c1  | unnamed protein product                                  |                                                                                                                              | YRPGTVALR,EIAQDFK,RVTIMPK<br>,STELLIR,FQSSAVMALQEASEAY<br>LVGLFEDTNLCAMHAK,KLPFQR                                                                                                                                      |                                                                                                                                                                                                                     |
| IPI00282848.1 | Q8CGN9 | Hist2h3c1  | histone cluster 2, H3c1                                  |                                                                                                                              | FQSSAVMALQEASEAYLVGLFED<br>TNLCAIHAK,YRPGTVALR,EIAQD<br>FK,RVTIMPK,STELLIR,KLPFQR                                                                                                                                      | FQSSAVMALQEASEAYLVGLFEDT<br>NLCAIHAK,YRPGTVALR,EIAQDFK,<br>RVTIMPK,STELLIR,KLPFQR                                                                                                                                   |
| IPI00283611.1 | P17710 | Hk1        | Isoform HK1-SA of Hexokinase-1                           |                                                                                                                              | SANLVAATLGAILNR,GAAMVTAV<br>AYR,VTVGVDGTLYK,GDFLALDL<br>GGTNFR,LSDEILIDILTR                                                                                                                                            |                                                                                                                                                                                                                     |
| IPI00114342.1 | O08528 | Hk2        | Hexokinase-2                                             |                                                                                                                              | GSGTQLFDHIAECLANFMDK,GA<br>ALITAVACR,LDESFLVSWTK,TVF<br>DVAVDELSLNP GK,GAAMVTAVA<br>YR,LSDETLLEISR,ICQIVSTR,DVS<br>DIEDDKDGIQK,VTVGVDGTLYK,L<br>SHEQLLEV K,GLGATTHPTAAVK,<br>ASGCEGEDVVTLLK,GDFLALDLG<br>GTNFR,DVVDLIR | LGLSPLQEDCVATHR,LSPELLTTGS<br>FETK                                                                                                                                                                                  |
| IPI00408022.4 | Q3TIV0 | Hmbs       | hydroxymethylbilane synthase isoform 1                   |                                                                                                                              |                                                                                                                                                                                                                        | GAQLAAENLGISLASLLLNK,DVPTIL<br>PPGFTIGAICK                                                                                                                                                                          |
| IPI00467235.4 |        | Hmcn1      | hemicentin 1                                             |                                                                                                                              |                                                                                                                                                                                                                        | LVIQAQVSDTGlyQCvatniAGDH<br>R,VSLTVHVPPSIK,NLMGSVLR,TG<br>ALFISNLWASDK,QSVTLTCEVR,CV<br>VHCGTGFRR,ILSSGAIEIPTTQLNH<br>AGR,SQGVGRPCIDINECEQVPKPC<br>AHQCSNSPGSFK,MIPDSTNVEILTG<br>GQTLHIR,LCDNPPPANGGRPCQG<br>ADSEAR |
| IPI00314240.5 | P17095 | Hmga1-rs1  | Isoform HMG-I of High mobility group protein HMG-I/HMG-Y |                                                                                                                              |                                                                                                                                                                                                                        | SSQPLASK,QPPVSPGTALVGSQK,<br>KQPPVSPGTALVGSQK                                                                                                                                                                       |
| IPI00462291.5 | P30681 | Hmgb2      | High mobility group protein B2                           |                                                                                                                              | RPPSAFFLFCSENRPK,IKIEHPGL<br>SIGDTAK,IEHPGLSIGDTAK,KHP<br>DSSVNFAEFSK,MSSYAFFVQTC<br>R,SKFEDLAK                                                                                                                        | HPDSSVNFAEFSK,IEHPGLSIGDTA<br>K,SKFEDLAK                                                                                                                                                                            |

|               |        |        |                                                            |                                                                                                                                                                                                                                                                                                                                                                                                                                                                                                                                                                    |
|---------------|--------|--------|------------------------------------------------------------|--------------------------------------------------------------------------------------------------------------------------------------------------------------------------------------------------------------------------------------------------------------------------------------------------------------------------------------------------------------------------------------------------------------------------------------------------------------------------------------------------------------------------------------------------------------------|
| IPI00752490.1 | Q8VDR2 | Hmmr   | Hmmr protein                                               | HIAAAHQAILIAQEK,LTELTRANELLK,E<br>SQQNLNIDKDTLLASAK,SVEDVQQQ<br>ILTAESTNQEYAR,QALLNEHGATQEQ<br>LNK,DVTAQLESEQEK                                                                                                                                                                                                                                                                                                                                                                                                                                                    |
| IPI00314755.5 | P97825 | Hn1    | Hematological and neurological<br>expressed 1 protein      | VLRPPGGGSNFSLGFDEPAEQPVR,P<br>VPAAPVPSVPAPVPSR,SNSSEASS<br>GDFLDLK,MASNIFGTPEENPPSWAK,<br>GEGDMHENVDTDFQANLAQMEEK,VL<br>RPPGGGSNFSLGFDEPAEQPVRK                                                                                                                                                                                                                                                                                                                                                                                                                    |
| IPI00109813.1 | Q9CX86 | Hnmpa0 | heterogeneous nuclear ribonucleoprotein<br>A0              | AEIIADK,GDVAEGDLIEHFSQFGAVEK,<br>LFIGGLNVQTSSEGLR<br>GHFEAFGLTDCVVVNPQTK,S<br>GGGGGGGGSWGGR,GDVAEGD FHPIQGHR,SGGGGGGGGGSWGGR,<br>LIEHFSQFGAVEK,LFIGGLNVQTS GDVAEGDLIEHFSQFGAVEK<br>ESGLR,GFGFVYFQSHDAADK                                                                                                                                                                                                                                                                                                                                                           |
| IPI00553777.2 | Q3UK83 | Hnmpa1 | Putative uncharacterized protein                           | KIFVGGIK,GNFVGGR,EDSQRPGAHL<br>TVK,NQGGYGGSSSSSYGSGR,SSG<br>PYGGGGQYFAK,RGFAFVTFDDHDSV<br>DK,GFAFVTFDDHDSVDK,KLFIGGLSF<br>ETTDESLR,SESPKEPEQLR,SSGPY<br>GGGQYFAKPR,GFGFVYATVEEVDA<br>AMNAR,IFVGGIKEDTEEHHLR,LFIGGL<br>SFETTDESLR,IEVIEIMTDR,IFVGGIK,S<br>ESPKEPEQLRK,EDTEEHHLR<br>KIFVGGIK,EDSQRPGAHLTVK,NQ<br>GGYGGSSSSSYGSGR,SHFEQ<br>WGTLTDCVVMR,SSGPYGGGGQ<br>YFAK,RGFAFVTFDDHDSVDK,GF<br>AFVTFDDHDSVDK,SESPKEPEQ<br>LR,KLFIGGLSFETTDESLR,GFGF<br>VTYATVEEVDAAMNAR,IFVGGIK<br>EDTEEHHLR,LTDCVVMR,LFIGGL<br>SFETTDESLR,YHTVNGHNCEVR,<br>IEVIEIMTDR,SESPKEPEQLRK |
| IPI00269661.1 | Q8BG05 | Hnmpa3 | Isoform 1 of Heterogeneous nuclear<br>ribonucleoprotein A3 | KIFVGGIK,GFGFVYSCVEEVDAAMC<br>AR,LFIGGLSFETDDSLREHFEK,RGF<br>AFVTFDDHDTVDK,EDTEYNLR,DYF<br>EK,EDSVKPGAHLTVK,RGEEGHDPKE<br>PEQLR,IFVGGIKEDTEEYNLRDYFEK,<br>GFAFVTFDDHDTVDK,LFIGGLSFETD<br>DSLRL,SSGSPYGGGYGSGGGGGY<br>SR,DYFEKYGK,KLFIGGLSFETDDSL<br>R,IFVGGIKEDTEEYNLR,KLFIGGLSFE<br>TTDDSLREHFEK,IETIEVMEDR,IFVGG<br>IK<br>LFIGGLSFETDDSLR,GFAFVTFD<br>DHTVDK,YHTINGHNCEVK,RGF<br>AFVTFDDHDTVDK,LFIGGLSFET<br>TDDSLREHFEK,EDTEYNLR,KL<br>FIGGLSFETDDSLR,EDSVKPGA<br>HLTVK,LTDCVVMR,IFVGGIKEDT<br>EEYNLR,IETIEVMEDR                                                |
| IPI00277066.4 | Q20BD0 | Hnmpab | heterogeneous nuclear ribonucleoprotein<br>A/B isoform 1   | GFVFITFKEEDPVK,RGFVFITFK,MFVG<br>GLSWDTSKK,IFVGGLNPEATEEKIR,G<br>FGFILFK,EYFGQFGEIEAIELPIDPK,MF<br>VGGLSWDTSK,GFVFITFKEEDPVKK,K<br>IFVGGGLNPEATEEK,IFVGGGLNPEATEE<br>K,EVYQQQQYGS GGR,FGFVITFKDSS<br>SVEK,GFVFITFK,IREYFGQFGEIEAIEL<br>PIDPK,SRGFGFILFKDSSSVEK,MDPN<br>TGRSRGFGFILFK<br>EVYQQQQYGS GGR,IFVGGGLNPE<br>ATEEK,RGFVFITFK,GFVFITFK,G<br>FGFILFK,MFVGGLSWDTSK,EYF<br>GQFGEIEAIELPIDPK,GFVFITFKE<br>EDPVKK,FGEVVDCTIK                                                                                                                                     |



|               |          |         |                                                         |                                                                                                                                                                                                       |                                                                                                                                                                                                                                                                                                                                                                                                                                                                                          |
|---------------|----------|---------|---------------------------------------------------------|-------------------------------------------------------------------------------------------------------------------------------------------------------------------------------------------------------|------------------------------------------------------------------------------------------------------------------------------------------------------------------------------------------------------------------------------------------------------------------------------------------------------------------------------------------------------------------------------------------------------------------------------------------------------------------------------------------|
| IPI00130343.2 | Q3U6P5   | Hnrnpc  | Putative uncharacterized protein                        |                                                                                                                                                                                                       | LKGDDLQAIK,VFIGNLTLLVVK,LK<br>GDDLQAIK,VPPPPPIAR,GFAFV LKGDDLQAIK,VFIGNLTLLVVK,VPP<br>QYVNER,SEEEQSSASVK,MIAGQ PPPIAR,VDSLLESLEK,IVGCSVHK<br>VLDINLAAEPK,KSDVEAIFSK                                                                                                                                                                                                                                                                                                                      |
| IPI00330958.2 | Q60668   | Hnrnpd  | Isoform 1 of Heterogeneous nuclear ribonucleoprotein D0 | GFCFITFK,MFIGGLSWDTTK,IFVGGLS<br>PDTPEEK,EYFGGFGEVESIELPMDNK<br>,EYFGGFGEVESIELPMDNKTNK,GFG<br>FVLFKESVVDKVMQK,IREYFGGFG<br>EVESIELPMDNK,SRGFGFVLFKES<br>VDK,SRGFGFVLFK,IFVGGLSPDTPEE<br>KIR,GFGFVLFK | GFCFITFK,IFVGGLSPDTPEEK,Y<br>HNVGLSK,GFGFVLFK<br>GFCFITFK,IFVGGLSPDTPEEK,YHN<br>VGLSK                                                                                                                                                                                                                                                                                                                                                                                                    |
| IPI00226073.2 | Q9Z2X1   | Hnrnpf  | Isoform 1 of Heterogeneous nuclear ribonucleoprotein F  | ITGEAFVQFASQELA EK,VTGEADVEF<br>ATHEEAVAAMSK,GLPYKATENDIYNF<br>FSPLNPVR,VTGEADVEFATHEEAVAA<br>MSKDR,QSGEAFVELESEDDVK,ATEN<br>DIYNFFSPLNPVR                                                            | ITGEAFVQFASQELA EK,VTGEAD<br>VEFATHEEAVAAMSK,EEIVQFFS<br>GLEIVPNGITLPVDPEGK,RYIGIV<br>K,HSGPNSADSANDGFVR,PGPY<br>DRPGTAR,VHIEIGPDGR,YIEVFK,<br>ATENDIYNFFSPLNPVR<br>ITGEAFVQFASQELA EK,HSGPNSA<br>DSANDGFVR,RYIGIVK,PGPYDRPG<br>TAR,VHIEIGPDGR,ATENDIYNFFSP<br>LNPVR                                                                                                                                                                                                                     |
| IPI00224729.1 | Q8C2Q7   | Hnrnph1 | Putative uncharacterized protein                        | VTGEADVEFATHEDAVAAMSK,EGRP<br>SGEAFVELESEDEVK,SNNVEMDWVL<br>K,YVELFLNSTAGASGGAYEHR,PSGE<br>AFVELESEDEVK,STGEAFVQFASQEI<br>AEK,ATENDIYNFFSPLNPVR                                                       | EEIVQFFS GLEIVPNGITLPVDFQ<br>GR,EGRPSGEAFVELESEDEVK,Y<br>VELFLNSTAGASGGAYEHR,VHIE<br>IGPDGR,ATENDIYNFFSPLNPVR,<br>STGEAFVQFASQEA EK<br>HTGPNSPDTANDGFVR,GLPWSCS<br>ADEVQR,VHIEIGPDGR,STGEAFVQ<br>FASQEA EK,ATENDIYNFFSPLNPV<br>R                                                                                                                                                                                                                                                         |
| IPI00108143.1 | P70333   | Hnrnp2  | Heterogeneous nuclear ribonucleoprotein H2              | VTGEADVEFATHEDAVAAMAK,EGRP<br>SGEAFVELESEDEVK,ATENDIYNFFS<br>PLNPMR,PSGEAFVELESEDEVK,STG<br>EAFVQFASQEA EK                                                                                            |                                                                                                                                                                                                                                                                                                                                                                                                                                                                                          |
| IPI00224575.1 | P61979-2 | Hnrnpk  | Isoform 2 of Heterogeneous nuclear ribonucleoprotein K  | IILDLISESPIK,IITITGTQDQIQNAQYLL<br>QNSVK,TDYNASVSVDPSSGPER,ILSI<br>SADIETIGEILKK,LLIHQSLAGGIIGVK,G<br>SYGDLGGPIITTQVTIPK,ILSISADIETIG<br>EILK                                                         | RPAEDMEEEQAFKR,VVLIGGKP<br>DR,ENTQTTIK,DLAGSIIGK,IIPTLE<br>EGLQLPSPTATSQLPLESDAVEC<br>LNYQHVK,GSYDGLGGPIITTQVTI<br>PK,LLIHQSLAGGIIGVK,NLPLPPP<br>PPPR,IILDLISESPIK,IITITGTQDQI<br>QNAQYLLQNSVK,TDYNASVSVDP<br>DSSGPER,ILSISADIETIGEILKK,I<br>DEPLEGSEDR,ILSISADIETIGEIL<br>K<br>VVLIGGKPDR,DLAGSIIGK,IILDLISE<br>SPIK,IITITGTQDQIQNAQYLLQNSV<br>K,IIPTLEEGLQLPSPTATSQLPLESD<br>AVECLNYQHVK,TDYNASVSVDPSS<br>GPER,GSYDGLGGPIITTQVTIPK,LLI<br>HQSLAGGIIGVK,NLPLPPPPPR,IL<br>SISADIETIGEILK |

|               |        |          |                                                                       |                                                                                                                                           |                                                                                                                                                                                                                                                                                                                                                                             |                                                                                                                                                                                                             |
|---------------|--------|----------|-----------------------------------------------------------------------|-------------------------------------------------------------------------------------------------------------------------------------------|-----------------------------------------------------------------------------------------------------------------------------------------------------------------------------------------------------------------------------------------------------------------------------------------------------------------------------------------------------------------------------|-------------------------------------------------------------------------------------------------------------------------------------------------------------------------------------------------------------|
| IPI00620362.4 | Q8R081 | Hnrnpl   | Heterogeneous nuclear ribonucleoprotein L                             | ASLNGADIYSGCCTLK,NDQDTWDYT<br>NPNLSGQGDPGSPNPK,SKPGAAMVE<br>MADGYAVDR,SDALETGLFLNHYQMK,<br>NDQDTWDYTNPNLSGQGDPGSPNPK<br>R                 | LKTENAGDQHGGGGGGSGAA<br>GGGGGENYDDPHK,YGPQYGH<br>PPPPPPDYGPHADSPVLMVYGL<br>DQSK,YYGGGNEGGR,GLIDGVV<br>EADLVEALQEFGPISYVVVMPK,AI<br>THLNNFMFGQK,TENAGDQHG<br>GGGGGSGAAGGGGGENYDDP<br>HK,IQHPSNVLHFFNAPLEVTEEN<br>FFEICDELGVK,VFNVFCLYGNVE<br>K,LCFSTAQHAS,SSSGLLEWDSK<br>,FSTPEQAAK,ASLNGADIYSGCC<br>TLK,NPNGPYPYTLK,IEYAKPTR,I<br>SRPGSDDSR,SDALETGLFLNH<br>YQMK,TPASPVVHIR | YYGGGNEGGR,ASLNGADIYSGCC<br>TLK,ISRPGSDDSR,GLIDGVVEAD<br>LVEALQEFGPISYVVVMPK,TENAG<br>DQHGGGGGGSGAAGGGGGENY<br>DDPHK,TPASPVVHIR                                                                             |
| IPI00132443.3 | Q9D0E1 | Hnrmpm   | Isoform 1 of Heterogeneous nuclear ribonucleoprotein M                | VKEDPDGEHAR,AAEVLNK,INEILSNA<br>LK,VGQTIER,MGAGMGFGLER,VGSEI<br>ER,MGPLGLDHMASSIER,VGEVTVYE<br>LLMDAEGK,GIGMGNLGPAGMGMEGI<br>GFGINK       | AFITNIPFDVK,LKEVFSMAGVVVR<br>,LGSTVFVANLDYK,VGQTIER,GN<br>FGGSFAGSFGGAGGHAPGVAR,<br>GCAVVEFK,VGEVTVVELLMDAE<br>GK,DKFNECGHVLADIK,KAAEV<br>LNK,INEILSNALK,ACQIFVR,FESP<br>EVAER,EVFSMAGVVVR                                                                                                                                                                                  | AFITNIPFDVK,INEILSNALK,GNFGG<br>SFAGSFGGAGGHAPGVAR,GCAVV<br>EFK,GIGMGNLGPAGMGMEGIGFI<br>NK                                                                                                                  |
| IPI00128441.3 | Q8VHM5 | Hnrnpr   | Putative uncharacterized protein                                      | YGGPPPDSVYSGVQPGIGTEVFVGK,T<br>GYTLDVTTGQR,VTEGLVDVILYHQPD<br>DK,NLATTVTEEILEK,AGPIWDLR                                                   | TGYTLDVTTGQR,VTEGLVDVILY<br>HQPDDK,EIEGEEIEIVLAKPPDKK<br>,LFGVSIPK,NLATTVTEEILEK,AG<br>PIWDLR                                                                                                                                                                                                                                                                               |                                                                                                                                                                                                             |
| IPI00458583.3 | Q8VEK3 | Hnrnpu   | Putative uncharacterized protein                                      |                                                                                                                                           | DLPEHAVLK,VSELKEELKK,MCLF<br>AGFQR,LNTLLQR,GNFTLPEVAE<br>CFDEITYVELQK,APQCLGK,GYF<br>EYIEENK,NFILDQTNVSAQAQR,K<br>AVVVCVK,AVVVCVK,LSASSLTM<br>ESFAFLWAGGR,GYFYEIENKYS<br>R,LLEQYKEESK,EKPYFPIPEDCT<br>FIQNVPLEDR,DIDIHEVR,FIEIAR<br>,SSGPTSLFAVTVAPPGAR,NGQD<br>LGVAFK,EVLADRPLFPHVLCHNC<br>AVEFNFGQK,LLEQYKEESK,VS<br>ELKEELK,KDCEVMMIGLPGAGK                              | DLPEHAVLK,PWSQHYHQGY,MCL<br>FAGFQR,LNTLLQR,NFILDQTNVSA<br>AAQR,AVVVCVK,YNILGTNTIMDK,N<br>QSQYQWQQQGFQWQK,LSASS<br>LTMESFAFLWAGGR,EKPYFPIPED<br>CTFIQNVPLEDR,FIEIAR,SSGPTS<br>LFAVTVAPPGAR,NGQD<br>ALDNEAGGR |
| IPI00123501.3 | Q8VDM6 | Hnrnpul1 | Isoform 1 of Heterogeneous nuclear ribonucleoprotein U-like protein 1 | APQQQPPPPQPPPPQPPPPQPPPP<br>SYSPAR,LLAALEAEPEPDER,YNILGT<br>NAIMDK,QNQFYETPVIK,NYILDQTNV<br>YGSAQR,RPLDMEPQQQVYHPELK,Q<br>EAPPSFLPPEASQLK |                                                                                                                                                                                                                                                                                                                                                                             |                                                                                                                                                                                                             |

|               |          |          |                                                 |                                                                                                                                                                               |                                                                                                   |                                                |
|---------------|----------|----------|-------------------------------------------------|-------------------------------------------------------------------------------------------------------------------------------------------------------------------------------|---------------------------------------------------------------------------------------------------|------------------------------------------------|
| IPI00755892.1 |          | Hnrpd1   | heterogeneous nuclear ribonucleoprotein D-like  | QHPLADGSATMEDMNEYSNIEEFAEG<br>SK,VFVGGLSPDTSEEQIKEYFGAFGEI<br>ENIELPMDTK,VFVGGLSPDTSEEQIK,<br>SAAAAAGTR,EYFGAFGEIENIELPMDT<br>K,DLTEYLSR,SRGFGFVLFK,MFIGGLS<br>WDTSK,GFGFVLFK | FGEVVDCTIK,GFGFVLFK                                                                               | VFVGGLSPDTSEEQIK,FGEVVDCTI<br>K                |
| IPI00395047.1 | Q99JP6-2 | Homer3   | Isoform 2 of Homer protein homolog 3            | ANTVYGLGFASEQQLTQFAEK,EAPDT<br>AEREETQQVQDLETR                                                                                                                                |                                                                                                   |                                                |
| IPI00284806.8 | P00493   | Hprt1    | Hypoxanthine-guanine phosphoribosyltransferase  | SVGYRPDFVGFGEIPDK,NVLIVEDIIDTG<br>K,FFADLLDYIK                                                                                                                                | SVGYRPDFVGFGEIPDK,VIGGDDL<br>STLTGK,NVLIVEDIIDTGK,FFADL<br>LDYIK,FVVGALDYNEYFR                    | TMQTLLSLVK,SVGYRPDFVGFGEIPD<br>K,VIGGDDLSTLTGK |
| IPI00128484.1 | Q91X72   | Hpx      | Hemopexin                                       | RLWWLDLK,LWWLDLK,VYLIQGTQVY<br>VFLTK                                                                                                                                          |                                                                                                   |                                                |
| IPI00130235.2 |          | Hs1bp3   | HCLS1-binding protein 3                         | DVEKSLVGEEEEEEEEVLDPLGIMR<br>,HRPEDVVQFLVSK                                                                                                                                   |                                                                                                   |                                                |
| IPI00170051.2 | Q8K3A0   | Hscb     | Co-chaperone protein HscB, mitochondrial        | LADAQSEAAMEEIEATVR,ADSQFLVEI<br>MEINER                                                                                                                                        |                                                                                                   |                                                |
| IPI00830581.1 | Q99N15   | Hsd17b10 | hydroxyacyl-Coenzyme A dehydrogenase type II    |                                                                                                                                                                               | FGRIDVAVNCAGIAVAIKTYHQK,L<br>GDPAEYAHLVQTIENPFLNGEVI<br>R,VVTIAPGLFATPLLTTLPEK,VIN<br>VNLIGTFNVIR |                                                |
| IPI00119219.2 | O70503   | Hsd17b12 | Isoform 1 of Estradiol 17-beta-dehydrogenase 12 |                                                                                                                                                                               | AFVDFFSQCLHEEYK,TIAVDFSL<br>DDIYDK,LININVLSVCK                                                    | GIFVQSVMPYLVATK,PTLDKPSAET<br>FVK              |
| IPI00331628.5 | P51660   | Hsd17b4  | Peroxisomal multifunctional enzyme type 2       |                                                                                                                                                                               |                                                                                                   | LPSFSSSYTELQSIMYALGVGASVK,<br>SGSGEVYQGPAK     |

---

IPI00330804.4 P07901 Hsp90aa1 Heat shock protein HSP 90-alpha

EGLELPEDEEEK,SLTNDWEEHLAVK,  
VILHLKEDQTEYLEERR,KHGLEVIYMI  
EPIDEYCVQQLK,HIYFITGETK,YYTSA  
SGDEMVS LK,APFDLFENR,NPDDITNE  
EYGEFYK,VILHLKEDQTEYLEER,RAP  
FDLFENR,HLEINPDHSIIETLR,ELHINLI  
PSK,HSQFIGYPITLFVEK,HFSVEGQLE  
FR,TLTIVDTGIGMTK,HNDDEQYAWES  
SAGGSFTVR,ADLNNLGTIAK

TKPIWTR,IRYESLTDPSK,YIDQE  
ELNK,LGIHEDSQNRK,HGLEVIYMI  
IEPIDEYCVQQLK,KHLEINPDHSII  
ETLR,YYTSASGDEMVS LK,LGLGI  
DEDDPTVDDTSAAVTEEMPPLEG  
DDDTSR,APFDLFENR,DQVANSA  
FVER,TDGTGEMGR,KHSQFIGYP  
ITLFVEK,RAPFDLFENR,TKFENL  
CK,YESLTDPSK,HSQFIGYPITLF  
VEK,HFSVEGQLEFR,DNSTMGY  
MAAK,FYEQFSK,EGLELPEDEEEK  
KK,ALLFVPR,LGIHEDSQNR,YES  
LTDPSKLD SGK,EGLELPEDEEEK  
,SLTNDWEEHLAVK,VFIMDNCEE  
LIPEYLN FIR,HIYFITGETK,KHGLE  
VIYMI EPIDEYCVQQLK,EGLELPE  
DEEEKK,ELISNSSDALDK,EML  
QQSK,NPDDITNEEYGEFYK,VILH  
LKEDQTEYLEER,EDQTEYLEER,  
HLEINPDHSIIETLR,ELHINLIPSK,  
LVTSPCCIVTSTYGWTANMER,TL  
TIVDTGIGMTK,FENLCK,DLVILLY  
ETALLSSGFSLEDPQTHANR,HN  
DDEQYAWESSAGGSFTVR,ADLI  
NNLGTIAK

TKPIWTR,YIDQEELNK,HGLEVIYMI  
EPIDEYCVQQLK,YYTSASGDEMVS  
LK,APFDLFENR,AFMEALQAGADIS  
MIGQFVG VGFYSAYLVAEK,DQVANSA  
AFVER,TDGTGEMGR,TKFENLCK,Y  
ESLTDPSK,HSQFIGYPITLFVEK,HF  
SVEGQLEFR,FYEQFSK,LGIHEDSQ  
NR,ALLFVPR,EGLELPEDEEEK,SLT  
NDWEEHLAVK,VFIMDNCEELIPEYL  
NFIR,HIYFITGETK,ELISNSSDALDK,  
EMLQQSK,NPDDITNEEYGEFYK,E  
DQTEYLEER,HLEINPDHSIIETLR,EL  
HINLIPSK,LVTSPCCIVTSTYGWTAN  
MER,TLTIVDTGIGMTK,FENLCK,DL  
VILLYETALLSSGFSLEDPQTHANR,  
ADLNNLGTIAK

---

|               |        |          |          |                                                                                                                                                                                                                                                                                                                                                                                                                                                                                                                                                                                                                                                                                                                                                                                                                                                                                                                                                                                                                                                                                                                                                                                                                                                                                                                                                                                                                                                                                                                                                                                                              |
|---------------|--------|----------|----------|--------------------------------------------------------------------------------------------------------------------------------------------------------------------------------------------------------------------------------------------------------------------------------------------------------------------------------------------------------------------------------------------------------------------------------------------------------------------------------------------------------------------------------------------------------------------------------------------------------------------------------------------------------------------------------------------------------------------------------------------------------------------------------------------------------------------------------------------------------------------------------------------------------------------------------------------------------------------------------------------------------------------------------------------------------------------------------------------------------------------------------------------------------------------------------------------------------------------------------------------------------------------------------------------------------------------------------------------------------------------------------------------------------------------------------------------------------------------------------------------------------------------------------------------------------------------------------------------------------------|
| IPI00229080.7 | Q71LX8 | Hsp90ab1 | MCG18238 | <p>TKPIWTR,IRYESLTDPSK,YIDQE<br/>         ELNK,IDIIPNPQER,FYEAFSK,LGL<br/>         GIDEDEVTAEEPSAAVPDEIPPLE<br/>         GDEDASR,KHLEINPDHPVETLR, TKPIWTR,IDIIPNPQER,YIDQEELNK<br/>         VFIMDSCDELIPEYLNFI,YESLT ,LGLGIDEDEVTAEEPSAAVPDEIPP<br/>         DPSK,ELISNASDALDK,HFSVEG LEGDEDASR,AFMEALQAGADISMI<br/>         QLEFR,EQVANSFAVER,YHTSQS GQFGVGFYSAYLVAEK,VFIMDSCD<br/>         EGLELPEDEEEK,HSQFIGYPITLYLEK, GDEMTSLSEYVSR,APFDLFENK, ELIPEYLNFI,YESLTDPSK,ELISNA<br/>         HFSVEGQLEFRALLFIPRR,VILHLKED EGLELPEDEEEK,RLSELLR,YES SDALDK,HFSVEGQLEFR,EQVANS<br/>         QTEYLEERR,SLTNDWEDHLAVK,VILH LTDPKLDGSG,HSQFIGYPITLYL AFVER,YHTSQSGDEMTSLSEYVSR<br/>         LKEDQTEYLEER,KHLEINPDHPVETL EK,EGLELPEDEEEK,AKFENLCK, ,APFDLFENK,CLELFSELAEDK,HSQ<br/>         R,ELISNASDALDK,RAPFDLFENK,NPD LGIHEDSTNRR,GFEVVMTEPID FIGYPITLYLEK,EGLELPEDEEEK,A<br/>         DITQEEYGEFYK,HFSVEGQLEFR,YHT EYCVQQLK,LGIHEDSTNR,EGLE KFENLCK,LGIHEDSTNR,ADHGEP<br/>         SQSGDEMTSLSEYVSR,APFDLFENK, LPEDEEEKKK,ADHGEPGR,EML GR,DLVLLFETALLSSGFSLEDPQT<br/>         HLEINPDHPVETLR,ADLNNLGTIAK,H QQSK,SLTNDWEDHLAVK,VILHL HSNR,SLTNDWEDHLAVK,EMLQQS<br/>         NDDEQYAWESSAGGSFTVR KEDQTEYLEER,EDQTEYLEER,A K,EDQTEYLEER,ALLFIPR,RAPFDL<br/>         LLFIPR,RAPFDLFENK,NPDDITQ FENK,NPDDITQEEYGEFYK,LVSSP<br/>         EEYGEFYK,LVSSPCCIVTSTYGW CCIVTSTYGTANMER,FENLCK,HL<br/>         TANMER,RGFEVVMTEPIDEYC EINPDHPVETLR,SIYYITGESK,ADLI<br/>         VQQLK,FENLCK,HLEINPDHPIVE NNLGTIAK<br/>         TLR,SIYYITGESK,RAPFDLFENK<br/>         ,ADLNNLGTIAK,HNDDEQYAW<br/>         SSAGGSFTVR</p> |
|---------------|--------|----------|----------|--------------------------------------------------------------------------------------------------------------------------------------------------------------------------------------------------------------------------------------------------------------------------------------------------------------------------------------------------------------------------------------------------------------------------------------------------------------------------------------------------------------------------------------------------------------------------------------------------------------------------------------------------------------------------------------------------------------------------------------------------------------------------------------------------------------------------------------------------------------------------------------------------------------------------------------------------------------------------------------------------------------------------------------------------------------------------------------------------------------------------------------------------------------------------------------------------------------------------------------------------------------------------------------------------------------------------------------------------------------------------------------------------------------------------------------------------------------------------------------------------------------------------------------------------------------------------------------------------------------|

|               |        |         |             |                                                                                                                                                                                                                                                                                                                                                                                                                                                                                                                                                                                                                                                                                                                                                                                         |
|---------------|--------|---------|-------------|-----------------------------------------------------------------------------------------------------------------------------------------------------------------------------------------------------------------------------------------------------------------------------------------------------------------------------------------------------------------------------------------------------------------------------------------------------------------------------------------------------------------------------------------------------------------------------------------------------------------------------------------------------------------------------------------------------------------------------------------------------------------------------------------|
| IPI00129526.1 | P08113 | Hsp90b1 | Endoplasmin | <p>KEAESSPFVER,FQSSHSTDITS<br/>         LDQYVER,GYEVYLTPEVDEYCI<br/>         QALPEFDGKR,KYSQFINFPIYVW<br/>         SSK,SGTSEFLNK,LIINSLYK,DIST<br/>         NYASQK,SILFVPTSAPR,YSQFI LISLTDENALAGNEELTVK,ELISNAS<br/>         ELISNASDALDK,EEEEIQLDGLNASQI NFPIYVWSSK,TDDEVVQREEEAI DALDK,FQSSHSTDITSLDQYVER,<br/>         R,FQSSHSTDITSLDQYVER,GVVDS QLDGLNASQIR,GLFDEYGSK,KG FAFQAEVNR,LGVIEDHSNR,LIINSL<br/>         DDLPLNVS,ILFVPTSAPR,NLLHVT YEVIYLTPEVDEYCIQALPEFDGK, YK,GVVDSDDLPLNVS,RFQNVAK,<br/>         DTGVMTR LISLTDENALAGNEELTVK,EEASD SILFVPTSAPR,YSQFINFPIYVWSSK<br/>         YLELDTIK,ELISNASDALDK,EEEE ,PIWQRPSK<br/>         IQLDGLNASQIR,FAFQAEVNR,LG<br/>         VIEDHSNR,GVVDSDDLPLNVS,<br/>         SGYLLPDTK,KTLDMIK,GTTITLV<br/>         K,NLLHVTDTGVMTR</p> |
|---------------|--------|---------|-------------|-----------------------------------------------------------------------------------------------------------------------------------------------------------------------------------------------------------------------------------------------------------------------------------------------------------------------------------------------------------------------------------------------------------------------------------------------------------------------------------------------------------------------------------------------------------------------------------------------------------------------------------------------------------------------------------------------------------------------------------------------------------------------------------------|

|               |          |        |                                           |                                     |
|---------------|----------|--------|-------------------------------------------|-------------------------------------|
| IPI00652428.1 | Q99M31-2 | Hspa14 | Isoform 2 of Heat shock 70 kDa protein 14 | FTVLFPSGTPLPAR,SALGEAAGAA<br>GFNVLR |
|---------------|----------|--------|-------------------------------------------|-------------------------------------|

|               |        |        |                              |                                                        |                                                                                                                   |
|---------------|--------|--------|------------------------------|--------------------------------------------------------|-------------------------------------------------------------------------------------------------------------------|
| IPI00346073.1 | P17879 | Hspa1b | Heat shock 70 kDa protein 1B | IINEPTAAAIAYGLDR,VEIANDQGNR,<br>QTQTFTTYSNQPGLIQVYEGER | VEIANDQGNR,QTQTFTTYSNQP<br>GVLIQVYEGER,NAVITVPAYFNDSQ<br>R,TTPSYVAFTDTER,ITITNDK,VCSP<br>IISGLYQGAGAPGAGGFGAQAPPK |
|---------------|--------|--------|------------------------------|--------------------------------------------------------|-------------------------------------------------------------------------------------------------------------------|

|               |        |        |                              |                             |
|---------------|--------|--------|------------------------------|-----------------------------|
| IPI00133208.3 | P16627 | Hspa1l | Heat shock 70 kDa protein 1L | VEIANDQGNR,IINEPTAAAIAYGLDK |
|---------------|--------|--------|------------------------------|-----------------------------|

|               |        |       |                             |                                                                                                                                                                                                                                                                                                                                                                                                                |                                                                                                                                                                                                                                                                                                                                                                                                                                                                                                                                                                                                                                                                                                                                         |                                                                                                                                                                                                                                                                                                                                                                                        |
|---------------|--------|-------|-----------------------------|----------------------------------------------------------------------------------------------------------------------------------------------------------------------------------------------------------------------------------------------------------------------------------------------------------------------------------------------------------------------------------------------------------------|-----------------------------------------------------------------------------------------------------------------------------------------------------------------------------------------------------------------------------------------------------------------------------------------------------------------------------------------------------------------------------------------------------------------------------------------------------------------------------------------------------------------------------------------------------------------------------------------------------------------------------------------------------------------------------------------------------------------------------------------|----------------------------------------------------------------------------------------------------------------------------------------------------------------------------------------------------------------------------------------------------------------------------------------------------------------------------------------------------------------------------------------|
| IPI00331556.5 | Q61316 | Hspa4 | Heat shock 70 kDa protein 4 | <p>KEDIYAVEIVGGATR,HAEQNGPVDGQ<br/>         GDNPGSQA AEHGADTAVPSDGDK,FV<br/>         SEDDRNTFTLK,AGGIETIANEYS DR,L<br/>         MNETTAVALAYGIYK,LEDTENWLYED<br/>         GEDQPK,NAVEEYVYEMR,GCALQCAI<br/>         LSPAFK,VLATAFDTTLGGR,NFTTEQV<br/>         TAMLSSK,SNLAYDIVQLPTGLTG I K,<br/>         VHGIFSVSSAALVEVHK,ELSTTLNADE<br/>         AVTR,MQVDQEEPHTEEQQQPQTPA<br/>         ENK,EDIYAVEIVGGATR</p> | <p>KEDIYAVEIVGGATR,NHAAPFSK,<br/>         QDLPAL EEEKPR,AGGIETIANEYS<br/>         DR,LKETAESVLK,GCALQCAILSP<br/>         AFK,NAVEEYVYEMR,NFTTEQVT<br/>         AMLLSK,SNLAYDIVQLPTGLTG I K,<br/>         ,FQESEERPK,ELSTTLNADEAVT<br/>         R,LKKEDIYAVEIVGGATR,LFEEL<br/>         GK,NKEDQYEH LDAADVTK,MQV<br/>         DQEEPHTEEQQQPQTPAENK,<br/>         NVVFVDMGHSAYQVSVCAFNK,H<br/>         AEQNGPVDGQGDNPGSQA AEH<br/>         GADTAVPSDGDK,KFDEVLVNHF<br/>         CEEFGK,LMNETTAVALAYGIYK,S<br/>         VMDATQIAGLNCLR,VLATAFDTT<br/>         LGGR,KPVVDCVSVPSFYTDAE<br/>         R,EPFTLEAYYSSPQDL PYPDAI<br/>         AQFSVQK,VNVHGIFSVSSAALVE<br/>         VHK,SQVISNAK, EFSITDVVPYPI<br/>         LR,EDIYAVEIVGGATR</p> | <p>WNSPAEEGLSDCEVFPK,AGGIETI<br/>         ANEYS DR,QDLPAL EEEKPR,FVSED<br/>         DR,AFSDPFVEAEK,ELTSICSPIISK,<br/>         SVM DATQIAGLNCLR,GCALQCAILS<br/>         PAFK,VLATAFDTTLGGR,NFTTEQV<br/>         TAMLSSK,KPVVDCVSVPSFYTDA<br/>         ER,SNLAYDIVQLPTGLTG I K,FQESE<br/>         ERPK,QLTVDPVVK,ELSTTLNADE<br/>         AVTR,EFSITDVVPYPI SLR,LFEELG<br/>         K</p> |
|---------------|--------|-------|-----------------------------|----------------------------------------------------------------------------------------------------------------------------------------------------------------------------------------------------------------------------------------------------------------------------------------------------------------------------------------------------------------------------------------------------------------|-----------------------------------------------------------------------------------------------------------------------------------------------------------------------------------------------------------------------------------------------------------------------------------------------------------------------------------------------------------------------------------------------------------------------------------------------------------------------------------------------------------------------------------------------------------------------------------------------------------------------------------------------------------------------------------------------------------------------------------------|----------------------------------------------------------------------------------------------------------------------------------------------------------------------------------------------------------------------------------------------------------------------------------------------------------------------------------------------------------------------------------------|

|               |        |        |                                           |                                                                  |
|---------------|--------|--------|-------------------------------------------|------------------------------------------------------------------|
| IPI00317710.1 | P48722 | Hspa4l | Isoform 1 of Heat shock 70 kDa protein 4L | <p>NAVEEYVYDFR,LMNETTAVALAYGIY<br/>         K,GCALQCAILSPAFK</p> |
|---------------|--------|--------|-------------------------------------------|------------------------------------------------------------------|

|               |        |       |                                  |                                                                                                                                                                                                                                                                                                                                                                                                                                                                                                                                                  |                                                                                                                                                                                                                                                                                                                                                                                                                                                                                                                                                                                      |                                                                                                                                                                                                                                                                                |
|---------------|--------|-------|----------------------------------|--------------------------------------------------------------------------------------------------------------------------------------------------------------------------------------------------------------------------------------------------------------------------------------------------------------------------------------------------------------------------------------------------------------------------------------------------------------------------------------------------------------------------------------------------|--------------------------------------------------------------------------------------------------------------------------------------------------------------------------------------------------------------------------------------------------------------------------------------------------------------------------------------------------------------------------------------------------------------------------------------------------------------------------------------------------------------------------------------------------------------------------------------|--------------------------------------------------------------------------------------------------------------------------------------------------------------------------------------------------------------------------------------------------------------------------------|
| IPI00319992.1 | P20029 | Hspa5 | 78 kDa glucose-regulated protein | <p>TFAPEEISAMV LTK,FEELNMDLFR,SQI<br/>         FSTASDNQPTVTIK,VEI IANDQGNR,IIN<br/>         EPTAAAIAYGLDKR,KSDIDEIVLVGGS<br/>         TR,IINEPTAAAIAYGLDK,NELESYAYS<br/>         LK,NQLTSNPENTVFD AK,ELEEIVQP I<br/>         SK,ITPSYVAFTPEGER,IEWLESHQDA<br/>         DIEDFK,GVPQIEVTFEIDVNGILR,TKP<br/>         YIQVDIGGGQTK,IEWLESHQDADIEDF<br/>         KAK,DNHLLGTFDLTGIPPAPR,MKETA<br/>         EAYLGK,VTHAVVTPAYFNDAQR,SDI<br/>         DEIVLVGGSTR,IEIESFFEGEDFSETLT<br/>         R,AKFEELNMDLFR,LYGSGGPPPTGE<br/>         EDTSEKDEL</p> | <p>TFAPEEISAMV LTK,VEI IANDQGN<br/>         R,SQIFSTASDNQPTVTIK,KSDIDE<br/>         IVLVGGSTR,IINEPTAAAIAYGLDK<br/>         ,IINEPTAAAIAYGLDKR,NQLTSNP<br/>         ENTVFD AK,NELESYAYSLK,ELEE<br/>         IVQPIISK,ITPSYVAFTPEGER,IEW<br/>         LESHQDADIEDFK,LTPEEIER,GV<br/>         PQIEVTFEIDVNGILR,TKPYIQVDI<br/>         GGGQTK,ITITNDQNR,DNHLLGTF<br/>         DLTGIPPAPR,MKETA EAYLGK,VT<br/>         HAVVTPAYFNDAQR,SDIDEIVL<br/>         VGGSTR,TWN DPSVQQDIK,IEIES<br/>         FFEGEDFSETLTR,AKFEELNMDL<br/>         FR,VYEGERPLTK,KKELEEIVQP I<br/>         SK</p> | <p>TKPYIQVDIGGGQTK,ITITNDQNR,S<br/>         QIFSTASDNQPTVTIK,VEI IANDQGN<br/>         R,DNHLLGTFDLTGIPPAPR,IINEPT<br/>         AAIAYGLDK,NQLTSNPENTVFD AK,<br/>         ,ELEEIVQPIISK,VTHAVVTPAYFN<br/>         DAQR,ITPSYVAFTPEGER,TWN DP<br/>         SVQQDIK,VYEGERPLTK</p> |
|---------------|--------|-------|----------------------------------|--------------------------------------------------------------------------------------------------------------------------------------------------------------------------------------------------------------------------------------------------------------------------------------------------------------------------------------------------------------------------------------------------------------------------------------------------------------------------------------------------------------------------------------------------|--------------------------------------------------------------------------------------------------------------------------------------------------------------------------------------------------------------------------------------------------------------------------------------------------------------------------------------------------------------------------------------------------------------------------------------------------------------------------------------------------------------------------------------------------------------------------------------|--------------------------------------------------------------------------------------------------------------------------------------------------------------------------------------------------------------------------------------------------------------------------------|

|               |        |       |                                   |                                                                                                                                                                                                                                                                                                                                                                                                                                                                                                                                                                                                                                                                                                                                                                                                                                                                                                                                                                                                                                                                                                                                                                                                                                                            |
|---------------|--------|-------|-----------------------------------|------------------------------------------------------------------------------------------------------------------------------------------------------------------------------------------------------------------------------------------------------------------------------------------------------------------------------------------------------------------------------------------------------------------------------------------------------------------------------------------------------------------------------------------------------------------------------------------------------------------------------------------------------------------------------------------------------------------------------------------------------------------------------------------------------------------------------------------------------------------------------------------------------------------------------------------------------------------------------------------------------------------------------------------------------------------------------------------------------------------------------------------------------------------------------------------------------------------------------------------------------------|
| IPI00323357.3 | P63017 | Hspa8 | Heat shock cognate 71 kDa protein | <p>VQVEYKGETK,HWPFMVNDAG<br/> RPK,ARFEELNADLFR,MKEIAEAY<br/> L GK,NQVAMNPTNTVFDAK,FEEL<br/> NADLFR,SFYPEEVSSMVLTK,GT<br/> CNEIISWLDK,NQVAMNPTNTVFDA<br/> K,FEELNADLFR,SFYPEEVSSMVLTK,<br/> LDPVEK,GVPQIEVTFDIDANGILN<br/> K,GTLDPVEK,VQVEYK,QTQFTTTY<br/> VSAVDK,VQVEYK,QTQFTTYSYSD<br/> K,SDNQPGVLIQVYEGER,DNNLLGK,<br/> NQPGVLIQVYEGER,RFDDAVVQ<br/> SDNQPGVLIQVYEGER,LLQDFFNGK,<br/> SDMK,TLSSSTQASIEIDSLYEGID<br/> NQTAEEKEEFEHQK,LLQDFFNGK,<br/> FYTSITR,NQTAEEKEEFEHQK,LL<br/> RNTTIPTK,IINEPTAAAIAYGLDKK,S<br/> QDFFNGK,RNTTIPTK,LSKEDIER,<br/> QIHDIVLVGGSTR,VEIANDQGNR,II<br/> IINEPTAAAIAYGLDKK,SQIHDI<br/> NEPTAAAIAYGLDK,VCNPIITK,MVN<br/> VGGSTR,VEIANDQGNR,IINEPTA<br/> HFIAEFK,GPAVGIDLGTTYSCVGF<br/> AAIAYGLDK,VCNPIITK,MVNHFI<br/> QH GK,EIAEAYLGK,ITITNDK,STAG<br/> EFK,NSLESYAFNMK,EIAEAYLGK<br/> DTHLGGEDFDNR,DAGTIAGLNVL<br/> R,STAGDTHLGGEDFDNR,SENV<br/> ,GP AVGIDLGTTYSCVGFQHGK,I<br/> SENVDLLLDVTPSLGIETAGGV<br/> TITNDK,NTTIPTK,DAGTIAGLNVL<br/> MTVLIK,FELTGIPPAPR,SINPDEAV<br/> R,STAGDTHLGGEDFDNR,SENV<br/> AYGAAVQAAILSGDK,TVTNAVVT<br/> QDLLLLDVTPSLGIETAGGVMTV<br/> PAYFNDSQR,TTPSYVAFTDTER,FD<br/> LIK,MVQEA EK,SINPDEAVAYGAA<br/> DAVVQSDMK<br/> VQAAILSGDK,TVTNAVVTVPAYF<br/> NDSQR,TTPSYVAFTDTER,FDDA<br/> VVQSDMK</p> |
|---------------|--------|-------|-----------------------------------|------------------------------------------------------------------------------------------------------------------------------------------------------------------------------------------------------------------------------------------------------------------------------------------------------------------------------------------------------------------------------------------------------------------------------------------------------------------------------------------------------------------------------------------------------------------------------------------------------------------------------------------------------------------------------------------------------------------------------------------------------------------------------------------------------------------------------------------------------------------------------------------------------------------------------------------------------------------------------------------------------------------------------------------------------------------------------------------------------------------------------------------------------------------------------------------------------------------------------------------------------------|

|               |        |       |                      |                                                                                                                                                                                                                                                                                                                                                                                                                                                                                                                                                                                                                                                                                                                                                                                                                                                                                                |
|---------------|--------|-------|----------------------|------------------------------------------------------------------------------------------------------------------------------------------------------------------------------------------------------------------------------------------------------------------------------------------------------------------------------------------------------------------------------------------------------------------------------------------------------------------------------------------------------------------------------------------------------------------------------------------------------------------------------------------------------------------------------------------------------------------------------------------------------------------------------------------------------------------------------------------------------------------------------------------------|
| IPI00880839.1 | Q7TSZ0 | Hspa9 | heat shock protein 9 | <p>VEAVNMAEGIIHDTETK,AQFEGIVTDLI<br/> K,VQQTVDLFGFR</p> <p>TTPSVVAFTADGER,ETAENYLGH<br/> TAK,SDIGEVILVGGMTR,VIAYVD<br/> LGGGTFDISILEIQK,NTTIPTK,LY<br/> SPSQIGAFVLMK,MEEFKDQLPAD<br/> RNTTIPTK,LLGQFTLIGIPPAPR,VLE<br/> ECNK,STNGDTFLGGEDFDQALL<br/> NAEGAR,ASNGDAWVEAHGK,ETA<br/> R,SQVFSTAADGQTQVEIK,VEAV<br/> ENYLGHTAK,NAVITVPAYFNDSQR,<br/> NMAEGIIHDTETK,AQFEGIVTDLI<br/> SDIGEVILVGGMTR,VINEPTAAALA<br/> K,AMQDAEVSK,RNTTIPTK,ERVE<br/> YGLDK,EQQIVIQSSGGLSK,RYDDP<br/> AVNMAEGIIHDTETK,LLGQFTLIGI<br/> EVQK,LYSPSQIGAFVLMK,QAVTNP<br/> PPAPR,VLENAEGAR,ASNGDAW<br/> NNTFYATK,STNGDTFLGGEDFDQA<br/> VEAHGK,NAVITVPAYFNDSQR,G<br/> LLR,VEAVNMAEGIIHDTETK,DAGQI<br/> VPQIEVTFDIDANGIVHVS AK,VIN<br/> SGLNVL R,AQFEGIVTDLIK,VQQT<br/> EPTAAALAYGLDK,MKETAENYL<br/> QDLFGR<br/> HTAK,NTTIPTK,EQQIVIQSSGGL<br/> SK,RYDDPEVQK,GAVVGIDLGTT<br/> NSCVAVMEGK,DAGQISGLNVL R,<br/> VQQTVDLFGFR</p> |
|---------------|--------|-------|----------------------|------------------------------------------------------------------------------------------------------------------------------------------------------------------------------------------------------------------------------------------------------------------------------------------------------------------------------------------------------------------------------------------------------------------------------------------------------------------------------------------------------------------------------------------------------------------------------------------------------------------------------------------------------------------------------------------------------------------------------------------------------------------------------------------------------------------------------------------------------------------------------------------------|

|               |        |       |                                                          |                                                                                                                                                                                                                                                                                                          |                                                                                                                                                                                                                                                                                                                                                                                                                                                                                                              |                                                                                                                                                                                                                                                                                                                                                                                                     |
|---------------|--------|-------|----------------------------------------------------------|----------------------------------------------------------------------------------------------------------------------------------------------------------------------------------------------------------------------------------------------------------------------------------------------------------|--------------------------------------------------------------------------------------------------------------------------------------------------------------------------------------------------------------------------------------------------------------------------------------------------------------------------------------------------------------------------------------------------------------------------------------------------------------------------------------------------------------|-----------------------------------------------------------------------------------------------------------------------------------------------------------------------------------------------------------------------------------------------------------------------------------------------------------------------------------------------------------------------------------------------------|
| IPI00128522.1 | P14602 | Hspb1 | Isoform A of Heat shock protein beta-1                   | AVTQSAEITIPVTFEAR,QLSSGVSEIR,<br>HEERQDEHGYISR,KYTLPPGVDPTLV<br>SSLSPEGLTVEAPLPK,RVPFSLLR,<br>LPDEWSQWFSAAAGWPGYVR, LFDQA<br>FGVPR,EGVVEITGK,PLPAATAEGPAA<br>VTLAAPAFSR,AVTQSAEITIPVTFEAR<br>AQIGGPEAGK,VSLDVNHFAPEELTVK,<br>QDEHGYISR,AQIGGPEAGK,YTLPPGV<br>DPTLVSSLSPEGLTVEAPLPK,AQIG<br>GPEAGKSEQSGAK | AVTQSAEITIPVTFEAR,LFDQAFG<br>VPR,EGVVEITGK,KYTLPPGVDPT<br>LVSSLSPEGLTVEAPLPK,PLP<br>AATAEGPAAVTLAAPAFSR,LPDE<br>WSQWFSAAAGWPGYVR,VSLDVN<br>HFAPEELTVK,AQIGGPEAGK,YTL<br>PPGVDPTLVSSLSPEGLTVEA<br>PLPK,TKEGVVEITGK                                                                                                                                                                                                                                                                                            | AVTQSAEITIPVTFEAR,SPSWEPFR,<br>LFDQAFGVPR,EGVVEITGK,QLSSG<br>VSEIR,PLPAATAEGPAAVTLAAPAF<br>SR,VSLDVNHFAPEELTVK,QDEHG<br>YISR,AQIGGPEAGK,YTLPPGVDPT<br>LVSSLSPEGLTVEAPLPK,DWYP<br>AHSR                                                                                                                                                                                                               |
| IPI00308885.6 | P63038 | Hspd1 | Isoform 1 of 60 kDa heat shock protein,<br>mitochondrial | KPLVIIAEDVDGEALSTLVLNR,LVQDV<br>ANNTNEEAGDGTTTATVLAR,GVMLA<br>VDAVIAELK,ALMLQGVDLLADAVAVT<br>MGPK                                                                                                                                                                                                        | KPLVIIAEDVDGEALSTLVLNR,VG<br>LQVVAVK,VGEVIVTK,TALLDAAG<br>VASLLTTAEAVVTEIPK,NAGVEG<br>SLIVEK,IQEITEQLDITTSEYEK,IS<br>SVQSIVPALEIANHR, LSDGVAVL<br>DALNATR,TVIIEQSWGSPK,ALML<br>QGVDLLADAVAVTMGPK,DMAIA<br>TGGAVFGEEGLNLELVQAHDL<br>GK,KISSVQSIVPALEIANHR,LVQ<br>DVANNTNEEAGDGTTTATVLAR,<br>GVMLAVDAVIAELK,APGFGDNR,I<br>PAMTIAK,IQEITEQLDITTSEYEKE<br>K,TLNDELEIIEGMK,GYISPYFINT<br>SK,APGFGDNRK,TALLDAAGVAS<br>LLTTAEAVVTEIPKEEK,IGIEIHK,IGI<br>EIKR,VGGTSDVEVNEK,AAVEEG<br>IVLGGGCALLR,GVMLAVDAVIAE<br>LKK | LVQDVANNTNEEAGDGTTTATVLA<br>R,VGLQVVAVK,VGEVIVTK,APGFG<br>DNR,IPAMTIAK,QSKPVTTPEEIAQV<br>ATISANGDK,TALLDAAGVASLLTTA<br>EAVVTEIPK,NAGVEGSLIVEK,ISSV<br>QSIVPALEIANHR,LSDGVAVLK,TL<br>NDELEIIEGMK,GANPVEIR,TALLDA<br>AGVASLLTTAEAVVTEIPKEEK,DIG<br>NIISDAMK,IGIEIHK,VTDALNATR,VG<br>GTSDVEVNEK,AAVEEGIVLGGGCA<br>LLR,CIPALDSLKPANEDQK,TVIIEQ<br>SWGSPK,PVTTPEEIAQVATISANG<br>DK,ALMLQGVDLLADAVAVTMGPK |
| IPI00263863.8 | Q64433 | Hspe1 | 10 kDa heat shock protein, mitochondrial                 | SGEIEPVSVK,FLPLFDR,DSDILGK,SA<br>AETVTK,VVLDDKDYFLFR,VLQATVVA<br>VGSGGK                                                                                                                                                                                                                                  | VLLPEYGGTK,VLQATVAVGSG<br>GKKG,KFLPLFDR,SGEIEPVSVK,<br>FLPLFDR,GGIMLPEK,SAETVTK<br>,VVLDDKDYFLFR,VLQATVAVG<br>SGGK                                                                                                                                                                                                                                                                                                                                                                                           | VLLPEYGGTK,SGEIEPVSVK,VLQA<br>TVVAVGSGGK                                                                                                                                                                                                                                                                                                                                                            |
| IPI00515360.8 |        | Hspg2 | perlecan                                                 |                                                                                                                                                                                                                                                                                                          | AGNGQEATITVTVTR,AASISAVSL<br>EVAQPGPSSGPR,KIPGDQIVSVV<br>FIK,IPGDQIVSVVFIK,AELLVAEAP<br>SKPITVTVEEQR,AEMLQALASLE<br>AVLLQTVYNTK                                                                                                                                                                                                                                                                                                                                                                              |                                                                                                                                                                                                                                                                                                                                                                                                     |



|               |        |       |                                                    |                                                                                                                                                                                                                                                                                                                                                                                   |                                                                                                                                                                                                                                                                                                                   |                                                                                     |
|---------------|--------|-------|----------------------------------------------------|-----------------------------------------------------------------------------------------------------------------------------------------------------------------------------------------------------------------------------------------------------------------------------------------------------------------------------------------------------------------------------------|-------------------------------------------------------------------------------------------------------------------------------------------------------------------------------------------------------------------------------------------------------------------------------------------------------------------|-------------------------------------------------------------------------------------|
| IPI00123802.5 | Q61699 | Hsph1 | Isoform HSP105-alpha of Heat shock protein 105 kDa | AGGIETIANEFSDR,AEDVSAIEIVGGA<br>TR,RGPFLEAFYSDPQGVPEAK,NI<br>QQDNSEAGTQPQVQTDGQQTSQSPP<br>SPELTSEESK,LMNDMTAVALNYGIYK,<br>VLGTAFDPPFLGGK,GCALQCAILSPAF<br>K,SVNEVMEWMNNVMNAQAK,VNTHG<br>IFTISTASMVEK,DVSTTLNADEAVAR                                                                                                                                                               | NHAAPFSK,AEDVSAIEIVGGATR,<br>LKETAENNLK,FVVQNVSAQK,NQ<br>QITHANNTVSSFK,FQEAERPK,<br>GCALQCAILSPAFAK,LVEHFCAEF<br>LGGK,GCALQCAILSPAFAK                                                                                                                                                                             |                                                                                     |
| IPI00271166.4 |        | Htt   | huntingtin                                         | SMVPTHPALVLLWCQILLINHTDHR,N<br>SAASGLFIQAIQSR                                                                                                                                                                                                                                                                                                                                     |                                                                                                                                                                                                                                                                                                                   |                                                                                     |
| IPI00463909.3 | A2AFQ0 | Huwe1 | HECT, UBA and WWE domain containing 1              |                                                                                                                                                                                                                                                                                                                                                                                   | LEHEVDLCR,LFLASLAAAGSGTD<br>AQVALVNEVK,IKGPNVQLVK,LL<br>VGNDVHIIAR,TTSNLTHYIHIEQL<br>DK,EVLQNLGIRPPTTR,LLAELVR<br>,LLGPSAAADILQLSSSLPLQSR,L<br>YIVFEGEEGQDAGLLR,SHHAA<br>STTTAPTAAAR,LQHLAESWGGK,<br>AALPLTTSDDTK,ALAELFGLLVK,LL<br>SLISIALPENK,MILNLTQSSGFNG<br>FTPLVTLLLR,TVLNQILR,TDATTA<br>IHK,FLGDEQDQITFVTR | LPGGVQSFPQFSALR,GLLPLVTILG<br>LPNLPIDFPTSAAQAVAGVCK,LLG<br>PSAAADILQLSSSLPLQSR      |
| IPI00319167.7 |        | Hydin | hydrocephalus inducing                             |                                                                                                                                                                                                                                                                                                                                                                                   | IPNVFLCDPEAR,ELLGTRR,LEFSP<br>SVLELGPLLPFASGDEAEVIVR,AEG<br>YTMNAEVK,RGTLASIDK                                                                                                                                                                                                                                    |                                                                                     |
| IPI00123342.4 | Q9JKR6 | Hyou1 | Hypoxia up-regulated protein 1                     | DAVITVPAFFNQAER,LGNTISSLFGGG<br>TSSDAK,SRFPEHELIVDPQR,FLGDSA<br>AGMAIK,VESVFETLVEDSPEEESTLTK<br>,AHFNLDSEGLSLDR,DAVIYPILVEFT<br>R,NINADEAAAAMGAVYQAAALSK,GVG<br>FDRTLGGLEMELELR,AANSLEAFIFET<br>QDK,LSATSTWLEDEGFGATTVMK,P<br>GVPMEIVLNK,VAIVKPGVPMIVLNK,F<br>PEHELIVDPQR,SLAEDFAEQPIK,LYQ<br>PEYQEVSTEEQR,LIPEMDQVFTEVEM<br>TTLEK,TLGGLEMELELR,DEPAEQGELK<br>EEAEPPAEETSQPPPSEPK | GQAGPEGAAPAEEDKK,VLQLIN<br>DNTATALSYGVFR,RAVLQAAR,D<br>AVIYPILVEFTR,LPATEKPVLLSK<br>MTTLEK                                                                                                                                                                                                                        | LGNTISSLFGGGTSSDAK,VLQLIND<br>NTATALSYGVFR,LIPEMDQVFTEVE                            |
| IPI00225201.5 | Q8BU30 | lars  | Isoleucyl-tRNA synthetase, cytoplasmic             |                                                                                                                                                                                                                                                                                                                                                                                   | TVVTSVFGVK,APLKPYPVPTSDN<br>ILIQEQTLK,GSELEITLTK,EIVVI<br>HQDPEALEDIR,SGSIVVEGHELH<br>EEDIR,YIIIEELNVR                                                                                                                                                                                                            | DSVPVCPVDASGCFTEEVTHFVGG<br>YVK,APLKPYPVPTSDNILIQEQTLK<br>K,LYLINSPPVVR,YAHQSGFHVDR |
| IPI00453499.3 | Q8BIJ6 | lars2 | Isoleucyl-tRNA synthetase, mitochondrial           |                                                                                                                                                                                                                                                                                                                                                                                   | IAPVASALETTFDVVAAFSGVDLE<br>GGTCSHPLTPDK,SLGNVINPDTII<br>SGGK,AFAPILPHLAEVVFQHIPYV<br>TEPK,SCQTALAEILDVLR,FLLG<br>NLTGFNPETDSVPVK                                                                                                                                                                                 | TGWINTSSIIWKK,CAEVIGAK,FLLG<br>NLTGFNPETDSVPVK,EGTDVVIK                             |

|               |        |         |                                                                          |                                                                                                                                                                |                                                                                                                                                                                                                                                                                                                                                                                                                                                                                       |
|---------------|--------|---------|--------------------------------------------------------------------------|----------------------------------------------------------------------------------------------------------------------------------------------------------------|---------------------------------------------------------------------------------------------------------------------------------------------------------------------------------------------------------------------------------------------------------------------------------------------------------------------------------------------------------------------------------------------------------------------------------------------------------------------------------------|
| IPI00828796.1 | Q8CGB9 | Ide     | insulin-degrading enzyme                                                 |                                                                                                                                                                | ESLDDLTLNLVVK,EALDDVTLPR,AFI<br>PQLLSR,GWVNTLVGGQK                                                                                                                                                                                                                                                                                                                                                                                                                                    |
| IPI00135231.2 | Q8C338 | ldh1    | Putative uncharacterized protein                                         |                                                                                                                                                                | LVTGWVKPIIIGR,NILGGTVFR                                                                                                                                                                                                                                                                                                                                                                                                                                                               |
| IPI00875110.1 |        | ldh2    | 52 kDa protein                                                           |                                                                                                                                                                | NYDGDVQSDILAQQGFGSLGLMTSV<br>LVCPDGK,LIDDMVAQVLK,NILGGT<br>VFR,LILPHVDVQLK                                                                                                                                                                                                                                                                                                                                                                                                            |
| IPI00459725.2 | Q9D6R2 | ldh3a   | Isoform 1 of Isocitrate dehydrogenase [NAD] subunit alpha, mitochondrial |                                                                                                                                                                | APIQWEER,TPYTDVNIVTIR,IAEF<br>AFEYAR,NVTAIQGPGGK                                                                                                                                                                                                                                                                                                                                                                                                                                      |
| IPI00109169.1 | P70404 | ldh3g   | Isocitrate dehydrogenase [NAD] subunit gamma, mitochondrial              |                                                                                                                                                                | DIDILIVR,HKDIDILIVR                                                                                                                                                                                                                                                                                                                                                                                                                                                                   |
| IPI00131056.1 | O88477 | Igf2bp1 | Insulin-like growth factor 2 mRNA-binding protein 1                      | AIETFSGK,TADEVPLK,MVVITGPPEA<br>QFK,LLVPTQYVGAIIIGK,TVNELQNLTA<br>AEVVVPR,DQTPDENDQVIVK,LYIGNL<br>NESVTPADLEK,VELQGK,ITISLQDLT<br>LYNPER,VSYPDEQITQGPENGR      | AISVHSTPEGCSSACK,MVVITGP<br>PEAQFK,TVNELQNLTAEEVVVPR<br>,LYIGNL NESVTPADLEK,ISYSGQ<br>AQFK,TVNELQNLTAEEVVVPR,LYI<br>FLVK,RLEIEHSVPK,VSYPDEQIT<br>GNL NESVTPADLEK,RLEIEHSVPK,I<br>QGPENGR,LNGHQLENHALK,GQ<br>SYSGQFLVK,QGSPVAAGAPAK,GQ<br>SNLAQAR,LLVPTQYVGAIIIGK,MIL<br>SNLAQAR,TADEVPLK,LLVPTQYV<br>EIMHK,DILAQVK,DQTPDENDQVI<br>AIIIGK,GAIENCCR,LKEENFFGPK,IL<br>VK,GAIENCCR,LKEENFFGPK,ILA<br>AHNNFVGR,LETHIR,ITISLQDLTLY<br>HNNFVGR,LETHIR,ITISLQDLTLY<br>NPER,QQPVDIPLR<br>YNPER |
| IPI00761863.1 | Q5SF07 | Igf2bp2 | Isoform 1 of Insulin-like growth factor 2 mRNA-binding protein 2         | ISYIPDEEVSSPSPPHR,SGYAFVDYPD<br>QNWAIR,ILVPTQFVGAIIIGK,TVNELQN<br>LTSAEVIVPR,LYIGNLSPA V TADDLR                                                                |                                                                                                                                                                                                                                                                                                                                                                                                                                                                                       |
| IPI00331315.9 | Q9CPN8 | Igf2bp3 | Insulin-like growth factor 2 mRNA-binding protein 3                      | LYIGNLSDHAGPADLESVFK,ITISPLQE<br>LTLYNPER                                                                                                                      | ITISPLQELTYNPER,ILAHNNFVG<br>R                                                                                                                                                                                                                                                                                                                                                                                                                                                        |
| IPI00308971.1 | Q07113 | Igf2r   | Cation-independent mannose-6-phosphate receptor                          |                                                                                                                                                                | SFSLGEIYFK,SATGQVQVLGLVH<br>TQK,YEVEWITEYACHR,ATLITFL<br>CDR,LEVIDETVIVTYSK,VCPAGT<br>AACLLK,AACAVRPQEV TMVNGT<br>LTNPVTGK                                                                                                                                                                                                                                                                                                                                                            |
| IPI00463186.7 |        | Igsf9b  | immunoglobulin superfamily, member 9B isoform 1                          |                                                                                                                                                                | PGLLQQAEMSEITLQPPAAVSFSRK<br>,CPVDAEPPATVVK,VLAVMQDLISE<br>PSNIAGVSSTDIFFQPDLTDDGLAR,<br>AGEGVVLR,ARPRPGLLQQAEMSEI<br>TLQPPAAVSFSR                                                                                                                                                                                                                                                                                                                                                    |
| IPI00127947.3 | Q95H93 | lk      | lK cytokine                                                              | DSEPFNSNPLAPDGHVDDPHSFHQSK<br>,DGVNKDYEETELISTTANYR,DYEETE<br>LISTTANYR,WDFDTQEEYSEYMNNK,<br>LTQILSYLR,KPPEADMNIFEDIGDYVP<br>STTK,GLDFALLQK,FAGSAGWEGTES<br>LK | KLLMTPR,LTQILSYLR                                                                                                                                                                                                                                                                                                                                                                                                                                                                     |
| IPI00831040.1 | Q7TSS3 | Ikbkg   | inhibitor of kappaB kinase gamma isoform 3                               | PAMLHLPSEQGTPE TLQR,KLAQLQAA<br>YHQLFQDYDSHIK,EYLQEQLEQLQR,L<br>AQLQAA YHQLFQDYDSHIK,AQVTSLL<br>GELQESQSR                                                      |                                                                                                                                                                                                                                                                                                                                                                                                                                                                                       |

|               |          |        |                                                    |                                                                                                                                                                                                    |                                                                                                        |                                                                                                                                                                                                                                                                                                                                                                                                                                                                            |
|---------------|----------|--------|----------------------------------------------------|----------------------------------------------------------------------------------------------------------------------------------------------------------------------------------------------------|--------------------------------------------------------------------------------------------------------|----------------------------------------------------------------------------------------------------------------------------------------------------------------------------------------------------------------------------------------------------------------------------------------------------------------------------------------------------------------------------------------------------------------------------------------------------------------------------|
| IPI00875742.1 | Q3UXI9   | Ilf2   | Putative uncharacterized protein                   |                                                                                                                                                                                                    | VLQSALAAIR,FPGFELTPWILDL<br>LGHYAVMNNPTR,ILPTLEAVAL<br>GNK,GTMTTGHNVDLVILK,INN<br>VIDNLIVAPGTFEVQIEEVR | VLQSALAAIR,CLQILAAGLFLPGSV<br>GITDPCESGNFR,ILPTLEAVALGN<br>K,NQDLAPNSAEQASILSLVTK,ILSH<br>GGFR                                                                                                                                                                                                                                                                                                                                                                             |
| IPI00130591.2 | Q9Z1X4-3 | Ilf3   | Isoform 3 of Interleukin enhancer-binding factor 3 | EPPLSLTIHLTSPVVR,QGGYSSQSNY<br>SSPGSSQSYSGPASSYQSSQGGYSR,<br>LFPDTPLALEANK,HSSVYPTQEELEA<br>VQNMVSHTER,VLAGETLSVNDPPDV<br>LDR,FVMEVEVDGQK,VADNLAIQLTTV<br>TEDK,VADNLAIQLTTVTEDKYEILQSV<br>DDAAIVIK | GDLDELVLCK,SCVIVIR,VLAGE<br>TLVNDPPDVLDR,FVMEVEVDG<br>QK,LNQLKPLQYK                                    | VPTWGPLR,LAAFGQLHK,IFVNDDR<br>,LNQLKPLQYK                                                                                                                                                                                                                                                                                                                                                                                                                                  |
| IPI00381412.1 | Q8CAQ8-2 | Immt   | Isoform 2 of Mitochondrial inner membrane protein  |                                                                                                                                                                                                    |                                                                                                        | GVYSEETLR,LSEQELEFR,YEFE<br>QGLSEK,RTFDSAVAK,STSETTE<br>EAFSSSVR,VVSQYHELVVQAR,T<br>SSAEMPTIPLGSAVEAIR,KPVQS<br>GPLK,EIAGATPHITAAEGR,RIDQ<br>LNR,AVDEAADALLK,TSSVTLQTI<br>TAQNAAVQAVK,GIEQAVQSHAV<br>AEEEEAR,SLEDALNR,TKGDTPAS<br>AAGDTLSVPAPAVQHEDTIK,YST<br>SSSSGLTAGK,LSTDDLNSLIAHA<br>HR,LHNMIVDLDNVVK,ERPPEEV<br>AAR,LFGMVLGSAPYTVPLPK,IAG<br>AGLLFVGGGIGGTILYAK,LPVAQ<br>SQK,KAHQLWLSVEALK,KAVDEA<br>ADALLK,VNCSDFEFTQAL TAAIP<br>PESLTR,QIVEILTAYASAVGIGTT<br>QVQQE |
| IPI00122383.1 | Q921Y2   | Imp3   | U3 small nucleolar ribonucleoprotein protein IMP3  | LYAMGLVPTR,VGPDVVTDPAFLVTR,<br>MAQHLQAAVAFVEQGHVR,LPTLLLKL<br>RMAQHLQAAVAFVEQGHVR,SMEDFV<br>TWDSSK                                                                                                 |                                                                                                        |                                                                                                                                                                                                                                                                                                                                                                                                                                                                            |
| IPI00395166.2 | Q8VHZ7   | Imp4   | U3 small nucleolar ribonucleoprotein protein IMP4  | VITFANQDDYISFR,LGTLEQEATADVE<br>WR,ALEENQLIPELRR,EALALQGSLE<br>FDDAGGEGVTSHVDDEYR,ALEENQLI<br>PELRR,HDIPDLGTMSEAKPHLITHGFS<br>SR                                                                   |                                                                                                        |                                                                                                                                                                                                                                                                                                                                                                                                                                                                            |
| IPI00319956.1 | O55091   | Impact | Protein IMPACT                                     | TEEVEVESEEDPILEHPPENPVK,ISEE<br>TQPETEELPPVAHGVPIIDR                                                                                                                                               |                                                                                                        |                                                                                                                                                                                                                                                                                                                                                                                                                                                                            |

|               |          |        |                                           |                                                                  |                                                                                                                                                                                                                                                                                                                    |                                                                                                                                                                                                                             |
|---------------|----------|--------|-------------------------------------------|------------------------------------------------------------------|--------------------------------------------------------------------------------------------------------------------------------------------------------------------------------------------------------------------------------------------------------------------------------------------------------------------|-----------------------------------------------------------------------------------------------------------------------------------------------------------------------------------------------------------------------------|
| IPI00323971.2 | P24547   | Impdh2 | Inosine-5'-monophosphate dehydrogenase 2  | YPSLQVIGGNVVTAAQAK,LPIVNEND<br>ELVAIIAR,EKYPQLQVIGGNVVTAAQA<br>K | HGFCGIPITDTGR,KYEQGFITDPV<br>VLSPK,NLIDAGVDALR,VAQGV<br>GAVQDK,LVGISSR,TSSAQVEG<br>GVHSLHSYEK,LPIVNEDELVAII<br>AR,REDLVVAPAGVTLK,GKLPVN<br>ENDELVAIIAR,FGVPVIADGGIQN<br>VGHIAK,FLEEIMTK,ALALGASTV<br>MMGSLAATTEAPGEYFFSDGIR                                                                                        | HGFCGIPITDTGR,KYEQGFITDPV<br>LSPK,VAQGVSGAVQDK,YEQGFIT<br>DPVVLSPK,TSSAQVEGGVHSLHSY<br>EK,LVGISSR,YPSLQVIGGNVVTAA<br>QAK,REDLVVAPAGVTLK,PQATAVY<br>K,EDLVVAPAGVTLK,NLIDAGVDAL<br>R,LPIVNEDELVAIIAR,FGVPVIADG<br>GIQNVGHIK   |
| IPI00135965.2 | P46660   | Ina    | Alpha-internexin                          | KVESLLDELAFVR,VGEGFEETLGEAVI<br>STK                              |                                                                                                                                                                                                                                                                                                                    |                                                                                                                                                                                                                             |
| IPI00265986.1 | Q9WU62   | Incenp | Isoform 1 of Inner centromere protein     | NSGCPSKPRSATK,PAAAGQTTTVEE<br>QEALDQTDGHR                        |                                                                                                                                                                                                                                                                                                                    | TFLHTVQK,VLSPILLNNILPTTAK                                                                                                                                                                                                   |
| IPI00877221.2 |          | Ints1  | Isoform 1 of Integrator complex subunit 1 |                                                                  |                                                                                                                                                                                                                                                                                                                    | EPPMEEDIGETDALQGYQWLLR,RP<br>PPHILDQVK                                                                                                                                                                                      |
| IPI00355368.4 | Q8K2V6-2 | Ipo11  | Isoform 2 of Importin-11                  |                                                                  |                                                                                                                                                                                                                                                                                                                    | AGLITNFNEPINQIATQIAVLIK,NME<br>VMGFLHGIFER                                                                                                                                                                                  |
| IPI00128880.3 | Q8VI75   | Ipo4   | Importin-4                                |                                                                  |                                                                                                                                                                                                                                                                                                                    | LLGLLLPLLAR,AGFLVLAVLSDGAG<br>DHIR,KAGFLVLAVLSDGAGDHIR,P<br>VMAVLESLTGVLR,DPAALPALFDL<br>LATATDSQIR,LLYPLLQIVCK,LFPVL<br>LNNAR                                                                                              |
| IPI00626994.3 | Q8BKC5   | Ipo5   | Isoform 1 of Importin-5                   |                                                                  | VSDILHSIFSSYK,SLVEIADTVPK,<br>LLSSAFDEVYPALPSDVQTAIK,TK<br>ENVNATENCISAVGK,KQAEETYE<br>NIPGR,EGFVEYTEQVVK,VIQAPE<br>AK,LVLEQVVTSIASVADTAEK,H<br>IVENAVQK,YLRPHLEATLQLSLK,I<br>FSIIAEGEMHEAIK,ICDIAAELAR,V<br>QAHA AAAALINFTEDCPK,ATAAFIL<br>ANEHNVALFK,ITFLLQAIR,TIECIS<br>LIGLAVGK,EAALHIFWNFPGIFGN<br>QQQHYLDVIK | VSDILHSIFSSYK,SLVEIADTVPK,LL<br>SSAFDEVYPALPSDVQTAIK,VAAAE<br>SMPLLLECAR,FVPPYDLFMPSLK,L<br>VLEQVVTSIASVADTAEK,HIVENA<br>VQK,VIQAPEAK,LVLPMIK,HFADLL<br>PGFLQAVNDSCYQNDSDSVLK,FMQ<br>DASDVMQLLLK,ICDIAAELAR<br>INQGVSHALTWK |
| IPI00331444.7 | Q9EPL8   | Ipo7   | Importin-7                                |                                                                  | VEAAIALQVLISNQEK,FPNNVEPV<br>TNHFITQWLNDVDCFLGLHDR,VL<br>TGVGAGEDAECHAAK,LLEVIIQCK<br>,AFAVGVQVLLK,DGALHMIGSL<br>AEILLK,AVTAMGILNTIDTLLSVVE<br>DHK                                                                                                                                                                 | SPLVAAMQHFLPVLK,VLTVGAGED<br>AECHAAK,GIDQCIPLFVEAALER,V<br>QLTTCIHIIK,AIFQTIQNR,SDQNLQ<br>TALELTR,YGSPGNVSK,VLQQTLYN<br>INQGVSHALTWK                                                                                        |
| IPI00130158.3 | Q91YE6   | Ipo9   | Importin-9                                |                                                                  | VLIFPVVQQFTEAFVQALQMPDG<br>PTSDSGFK,FTVAMSPELIQFLQ<br>ATVSGLHETQPPSVR                                                                                                                                                                                                                                              | FTVAMSPELIQFLQATVSGLHETQ<br>PPSVR,AAAEEQIK,EALVDTLTGILS<br>PVQEV                                                                                                                                                            |
| IPI00467447.3 | Q9JKF1   | Iqgap1 | Ras GTPase-activating-like protein IQGAP1 | LPYDVTPEQALSHEEVK,QILAPVVEI<br>MDDKSLNIK,EEVQAGVDAANSAAQ<br>YQR  | FPDAGEDELLK,IGGILANELSVDE<br>AALHAAVIAINEAIDR,IGGILANEL<br>SVDEAALHAAVIAINEAIDRR,LAA<br>VAAINAAIQK,LIVDVIR                                                                                                                                                                                                         | QLQSDLQKQK,LPYDVTPEQALSHEE<br>VK,FPDAGEDELLK,RLIVDVIR,QILA<br>PVVK,ATGLHFR,LA AVAANAIIQK,L<br>AYLHSHK,LGLAPQIQDLYGK                                                                                                         |

|               |        |         |                                                             |                                                                                                                                                                                                            |                                                                                                                                                                                                   |
|---------------|--------|---------|-------------------------------------------------------------|------------------------------------------------------------------------------------------------------------------------------------------------------------------------------------------------------------|---------------------------------------------------------------------------------------------------------------------------------------------------------------------------------------------------|
| IPI00854942.1 |        | lrf2bp2 | similar to interferon regulatory factor 2 binding protein 2 | SPADSLSSAAGASELSAEGAGK,RKPS<br>PEPEGEVGPPEK,AAATLAAVSGTPGLG<br>AQPAELGTHK                                                                                                                                  |                                                                                                                                                                                                   |
| IPI00222565.2 | Q3U1G5 | lsg2012 | unnamed protein product                                     | LVEVEWEQHLAQNPEN,DIQVGNTG<br>HSSVEDAQATMELYK,IDLLGEFQSAL<br>PK                                                                                                                                             |                                                                                                                                                                                                   |
| IPI00469994.2 | Q69ZQ2 | lisy1   | Pre-mRNA-splicing factor ISY1 homolog                       | VAQIQNAGLGEFR,FIAHVPVPSQQEIE<br>EALVR                                                                                                                                                                      |                                                                                                                                                                                                   |
| IPI00119886.1 | Q9JHU9 | lsyna1  | Inositol-3-phosphate synthase 1                             |                                                                                                                                                                                                            | VSFCTSDSDEPQGFHTVLSLLSF PSVYIPEFIAANQTAR,PGPGIKPGE<br>LFK,VIVLWTANTER,SVLVDFLIGS VVATSPLPCK,APLVPPGSPVVNAL<br>GLK FR                                                                              |
| IPI00420835.3 | Q61739 | ltga6   | Isoform Alpha-6X1B of Integrin alpha-6                      | PSGYNPPISILGILEAEKER,PSGYNPPI<br>SILGILEAEK,NSYPDLAVGSLSDSVTIF<br>R                                                                                                                                        |                                                                                                                                                                                                   |
| IPI00132474.3 | P09055 | ltgb1   | Integrin beta-1                                             |                                                                                                                                                                                                            | LRPEDITQIQPQQLLLK,LENNIQ LRPEDITQIQPQQLLLK,KDTCAQEC<br>TIFAVTEEFQPVYK,SAVTTVVNP SHFNLTKEVESR<br>K,LPDGVNTINYK                                                                                     |
| IPI00227834.8 | Q61703 | ltih2   | Inter-alpha-trypsin inhibitor heavy chain H2                | FYNQVSTPLLR,IQPSGGTNINEALLR                                                                                                                                                                                |                                                                                                                                                                                                   |
| IPI00831223.1 |        | ltsn1   | 195 kDa protein                                             | IPENEVPTPAKPVTDLTSAPAPK,LYKA<br>KSNK                                                                                                                                                                       |                                                                                                                                                                                                   |
| IPI00124575.1 | Q62315 | Jarid2  | Protein Jumonji                                             | IVEPLLPPPATQISDLSK,ALGPASEQS<br>ENEKDDASQVSSTSDVSSDFEFGP<br>SR                                                                                                                                             | SQGITMDELPLIGGCELDLACFFR,R<br>QHGEGLAGSLK                                                                                                                                                         |
| IPI00453693.2 | Q91XC0 | Jub     | Protein ajuba                                               | HSYPPALGSPGALTGAVVGTAGPLER,<br>YQDELTALLR,FEGSFPGPPPTR,GE<br>PSGIEPSGLEESPGPFVPEASR                                                                                                                        |                                                                                                                                                                                                   |
| IPI00229475.1 | Q02257 | Jup     | Junction plakoglobin                                        | LNYGIPAIVK,LLNQPNQWPLVK,ALMG<br>SPQLVAAVVR,VSVELTNSLFK,TLVTQ<br>NSGVEALIHAILR,LNTIPLFVQLLYSSV<br>ENIQR,NEGATYAAAVLFR,SAIVHLIN<br>YQDDAELATR,ILVNQLSVDDVNVLTTC<br>ATGTLNLTCSNNSK,EAADAIDAEGAS<br>APLMELLHSR | EGLLAIFK,LNYGIPAIVK,TLVTQN LNYGIPAIVK,NLSDVATK,VAAGVLC<br>SGVEALIHAILR,LNTIPLFVQLLYS ELAQDK,LNTIPLFVQLLYSSVENIQ<br>SVENIQR,VAAGVLCCELAQDK R,NLALCPANHAPLQEAVIPR                                   |
| IPI00469103.1 | Q8R2P8 | Kars    | lysyl-tRNA synthetase isoform 1                             |                                                                                                                                                                                                            | SQAVQQLK,LIFYDLR,PFITYHNE<br>LDMNLYMR,YLDLILNDFVR,RGDI SQAVQQLK,LPETSLFETEETR,ITYH<br>IGVEGNPGK,FHVDISLTQFIEYS PDGPEGQAYEVDFTPPFR,ILDDICV<br>HLQPGDHLTDVTLK,MLVGGIDR AK<br>,LPETSLFETEETR,FELFVMK |
| IPI00460716.2 | Q6PCM1 | Kdm3a   | Isoform 1 of Lysine-specific demethylase 3A                 |                                                                                                                                                                                                            | NVIYHAVK,EMCDVCDTTIFNLHWV<br>CPR,CLPPLPPLNKPSTVLHTFNSTI<br>LTPVSNNSGFLR,PASSVKPTCPT<br>STSPLNWLADLTSGNVNK                                                                                         |
| IPI00648673.4 | Q8BW72 | Kdm4a   | Isoform 1 of Lysine-specific demethylase 4A                 |                                                                                                                                                                                                            | TSYDDIDDLVIPAPIQLVLTGQSGLF<br>TQYNIQK,EDYIEPALYR                                                                                                                                                  |
| IPI00330824.9 | Q80Y84 | Kdm5b   | Isoform 1 of Lysine-specific demethylase 5B                 |                                                                                                                                                                                                            | VPVLETLIELVAR,LREMEALQSLR<br>FANEK                                                                                                                                                                |

|               |        |         |                                                                             |                                                                                                                                                                                                                                                                                                                    |                                                                    |
|---------------|--------|---------|-----------------------------------------------------------------------------|--------------------------------------------------------------------------------------------------------------------------------------------------------------------------------------------------------------------------------------------------------------------------------------------------------------------|--------------------------------------------------------------------|
| IPI00458765.2 | Q60749 | Khdrbs1 | KH domain-containing, RNA-binding, signal transduction-associated protein 1 | KDDEENYLDLFSHK,DSLDPSTHAMQ<br>LLSVEIEK,DDEENYLDLFSHK                                                                                                                                                                                                                                                               |                                                                    |
| IPI00314520.3 | Q9R226 | Khdrbs3 | KH domain-containing, RNA-binding, signal transduction-associated protein 3 | FLIPDYNDEIR,DSLDPSTHALR                                                                                                                                                                                                                                                                                            |                                                                    |
| IPI00462934.2 | Q3U0V1 | Khsrp   | Far upstream element-binding protein 2                                      | VGGGIDVPVPR,VPDGMVGLIIGR,GSP<br>QQIDHAK,QAQVATGGGPGAPPGSQP VGGGIDVPVPR,IQNDAGVR,VPD<br>DYSAAWAEYYR,AINQQTGAFVEISR,L GMVGLIIGR,IGQQPQQPGAPPQ<br>ASQGDSIGSQLGPIHPPPR,GGPPGQF QDYTK,MILIQDGSQNTNVDKPLR<br>HDNANGGQNGTVQEIMIPAGK,AGLVI ,HSVGVVIGR,VQISPDSSGGLPER<br>GK                                                 |                                                                    |
| IPI00876559.1 |        | Khsrp   | KH type splicing regulatory protein KSRP                                    | VGGGIDVPVPR,VPDGMVGLIIGR,GSP VGGGIDVPVPR,IINDLLQSLR,IQN VGGGIDVPVPR,IINDLLQSLR,IQND<br>QQIDHAK,AINQQTGAFVEISR,LASQG DAGVR,VPDGMVGLIIGR,MILIQD AGVR,VQISPDSSGGLPER,LASQGD<br>DSIGSQLGPIHPPPR,AGLVIGK,GGPP GSQNTNVDKPLR,HSVGVVIGR,V SIGSQLGPIHPPPR,HSVGVVIGR,R<br>GQFHDNANGGQNGTVQEIMIPAGK QISPDSSGGLPER QLEDGDQPSDK |                                                                    |
| IPI00130218.2 | Q6P9P6 | Kif11   | Kinesin-like protein KIF11                                                  | LDIPTGMTPER,TIVAPSVVILNINK,<br>LPLHTSINL,NLNSLFNNMEELIK                                                                                                                                                                                                                                                            |                                                                    |
| IPI00626501.3 | Q3UH16 | Kif1a   | Putative uncharacterized protein                                            | EALLAEMGVAMR,RVLDTSVAYVR,<br>LETTQRPGEVLSPASSESESR,DI<br>GEEMLQHAFEGYNVCIFAYGGTGA<br>GK                                                                                                                                                                                                                            |                                                                    |
| IPI00407864.2 | Q80V30 | Kif23   | Kinesin family member 23                                                    | KCLAFK,GGPIGDEPLVPEVILQSF<br>PLPCK                                                                                                                                                                                                                                                                                 |                                                                    |
| IPI00881982.1 |        | Kif2a   | 75 kDa protein                                                              | PLVETIFER,IDILTELR,GSLDYRPLTTA<br>DPIDEHR,FSLIDLAGNER,GNLFSIFMF<br>I,ARPSQLPEQSSSAQQNGSVSDISP<br>V<br>QAAK                                                                                                                                                                                                         |                                                                    |
| IPI00123365.1 | Q922S8 | Kif2c   | Kinesin-like protein KIF2C                                                  | FSLVDLAGNER,DSLPLQENVTVPK,VT<br>MECSPLTVTDPIEEHR                                                                                                                                                                                                                                                                   |                                                                    |
| IPI00881456.1 | Q80YP3 | Kif4    | kinesin family member 4                                                     | NKPIINIDPQAAELNHLK,VLYLLSQLQQ<br>SQMTEK                                                                                                                                                                                                                                                                            |                                                                    |
| IPI00555125.1 | Q5BL10 | Kif5b   | Kinesin family member 5B                                                    | ISFLENNLEQLTK,EYELLSDELNQK,SL<br>TEYLQNVEQK                                                                                                                                                                                                                                                                        | SLSALGNVISALAEGSTYVPYR,QLE<br>STQTESNK,PIRPGQHPAASPTH<br>PG<br>TVR |
| IPI00620804.2 | Q7M6Z6 | Klc1    | Kinesin light chain 1T (Fragment)                                           | TSGHDHPDVATMLNILALVYR,FEAAE<br>TLEEAAMR,NEHNSILQSLLETLK,DHP<br>AVAATLNNLAVLYGK,TLHNLVIQYASQ<br>GR,DAANLLNDALAIR                                                                                                                                                                                                    |                                                                    |
| IPI00120089.1 | Q9DBS5 | Klc4    | Kinesin light chain 4                                                       | GHPDVATMLNILALVYR,DHPAVAATL<br>NNLAVLYGK,ALAIYESQLGPDNPV<br>A<br>R                                                                                                                                                                                                                                                 |                                                                    |
| IPI00311329.1 | Q60960 | Kpna1   | Importin subunit alpha-1                                                    | IVQVALNGLENILR,IOAVIDAGVCR,<br>AVGNIVTGDDIQTQVILNCSALQSL<br>L<br>HLLSSPK                                                                                                                                                                                                                                           |                                                                    |

|               |          |       |                                              |                                                                                                                                                                                                                |                                                                                                                                                                                                                                                                                                                                                                                                                                                                                                                                                                                                                                                                                                                                                                                                                                                                    |
|---------------|----------|-------|----------------------------------------------|----------------------------------------------------------------------------------------------------------------------------------------------------------------------------------------------------------------|--------------------------------------------------------------------------------------------------------------------------------------------------------------------------------------------------------------------------------------------------------------------------------------------------------------------------------------------------------------------------------------------------------------------------------------------------------------------------------------------------------------------------------------------------------------------------------------------------------------------------------------------------------------------------------------------------------------------------------------------------------------------------------------------------------------------------------------------------------------------|
| IPI00230429.4 | O35344   | Kpna3 | Importin subunit alpha-3                     |                                                                                                                                                                                                                | AVGNIVTGTDEQTQVVLNCDVLSHF<br>PNLLSHPK,AQNVTLLEAILQNATSDN<br>PVVQLSAVQAAR,SGILPILVK,DQVE<br>YLVQQNVIPPCNLLSVK                                                                                                                                                                                                                                                                                                                                                                                                                                                                                                                                                                                                                                                                                                                                                       |
| IPI00129792.1 | O35343   | Kpna4 | Importin subunit alpha-4                     |                                                                                                                                                                                                                | DYVISLGVVKPLLSFISPSIPITFLR,<br>DAQVVQVVDGLSNILK                                                                                                                                                                                                                                                                                                                                                                                                                                                                                                                                                                                                                                                                                                                                                                                                                    |
| IPI00323881.1 | P70168   | Kpnb1 | Importin subunit beta-1                      |                                                                                                                                                                                                                | NYAEYQVCLAAVGLVGDLCR,VL<br>ANPGNSQVAR,VAALQNLVK,LLE<br>TDRPDGHQNNLR,SVKPILSVF<br>GDIALAIGGEFKK,PMIHELLTEGR<br>VLANPGNSQVAR,LLETDRPDGHQ<br>,ALQSNILPFCDEVMLLENLGN<br>NNLR,SNEILTAIQGM,PMIHELLTE<br>ENVHR,GALQYLPILTQTLTK,ES<br>GR,ESCLEAYTGIVQGLK,AAVENLP<br>CLEAYTGIVQGLK,AAVENLPTFL<br>TFLVELSR,GALQYLPILTQTLTK,IC<br>VELSR,SVKPILSVFGDIALAIGG<br>ELLPEAAINDVYLAPLLQCLIEGLSA<br>EFK,ICELLPEAAINDVYLAPLLQC<br>EPR,MELITILEK,VAAGLQIK,LELEA<br>LIEGLSAEPR,VAAGLQIK,IQFNDL<br>AQK,IQFNDLQSLLCATLQNVLR,TL<br>QSLLCATLQNVLR,TLATWATK,YL<br>ATWATK,GDQENVHPDVMLVQPR,<br>EVLNLTQQASQAQVDK,MFQST<br>SSAYESLMEIVK,IQFNDLQSLLCAT<br>AGSGGVQEDALMAVSTLVEVLG<br>LQNVLRK,WLAIDANAR,AAGVCLML<br>GEFLK,TVSPDRLELEAAQK,LQQ<br>LSTCCEDDIPHVLPFIK,LAATNALL<br>VLQMESHQSTSDR,SSAYESLME<br>NSLEFTK<br>IVK,HFIMQVVEATQCPDTR,AA<br>GVCLMMLSTCCEDDIPHVLPFIK,<br>TTLVIMER,LAATNALLNSLEFTK |
| IPI00625729.2 | P04104   | Krt1  | Keratin, type II cytoskeletal 1              | SLNDKFASFIDK,FLEQQNQVLQTK,TN<br>AENEFVTIKK,TNAENEFVTIK,SLNDKF<br>ASFIDKVR,YEDEINKR                                                                                                                             | FLEQQNQVLQTK,TNAENEFVTIK<br>K,KYEDEINKR,TNAENEFVTIK,FA<br>SFIDK                                                                                                                                                                                                                                                                                                                                                                                                                                                                                                                                                                                                                                                                                                                                                                                                    |
| IPI00798492.2 | P02535   | Krt10 | Isoform 1 of Keratin, type I cytoskeletal 10 | VTMQNLNDR,SEITELR,LENEIQTYR,Q<br>SVEADINGLR,QSLEASLAETEGR,ALE<br>ESNYELEGK                                                                                                                                     | NQYEQLAEKNRK,SEITELRR,VT<br>MQNLNDR,SEITELR,LENEIQTYR<br>GQILTLTDDNANVLLQIDNAR,LAAD<br>,LAADDFR,ALEESNYELEGK<br>DFR,QSVEADINGLR                                                                                                                                                                                                                                                                                                                                                                                                                                                                                                                                                                                                                                                                                                                                    |
| IPI00656215.1 | P08730-2 | Krt13 | Isoform 2 of Keratin, type I cytoskeletal 13 | QSVEADINGLR                                                                                                                                                                                                    |                                                                                                                                                                                                                                                                                                                                                                                                                                                                                                                                                                                                                                                                                                                                                                                                                                                                    |
| IPI00227140.1 | Q61781   | Krt14 | Keratin, type I cytoskeletal 14              | ADLEMQIESLKEELAYLK,ALEEANTEL<br>EVK,VTMQNLNDR,GQVGGDVNVEMD<br>AAPGVDLSR,LEQEIATYR,VLDELTLA<br>R,ILNEMR,EVATNSELVQSGK,TMQNL<br>EIELQSQLSMK,ADLEMQIESLKEELAY<br>LKK,CEMEQQNQEYKILLDVK,VVSTHE<br>QVLR,TRLEQEIATYR |                                                                                                                                                                                                                                                                                                                                                                                                                                                                                                                                                                                                                                                                                                                                                                                                                                                                    |
| IPI00828528.1 | Q61782   | Krt14 | Type I epidermal keratin (Fragment)          | LLEGEDAHLSSSQFSSGSQSSR,CEM<br>EQQNQEYKILLDVK,LEQEIATYR,TRLE<br>QEIATYR                                                                                                                                         |                                                                                                                                                                                                                                                                                                                                                                                                                                                                                                                                                                                                                                                                                                                                                                                                                                                                    |

|               |        |       |                                           |                                                                                                                                                                                                                                                                                                                                                               |                                                                                                                                                                                                                            |
|---------------|--------|-------|-------------------------------------------|---------------------------------------------------------------------------------------------------------------------------------------------------------------------------------------------------------------------------------------------------------------------------------------------------------------------------------------------------------------|----------------------------------------------------------------------------------------------------------------------------------------------------------------------------------------------------------------------------|
| IPI00225378.3 | B1AQ77 | Krt15 | keratin 15                                | VTMQNLNDR,KTEELNK,VTMQNLNDR<br>LASYLDKVR,LEQEIATYR,VLDELTAR<br>,RTLQGLEIELQSQLSMK,TLQGLEIELQ<br>SQLSMK,TRLEQEIATYR                                                                                                                                                                                                                                            |                                                                                                                                                                                                                            |
| IPI00131209.3 | Q9EQD6 | Krt16 | Keratin intermediate filament 16a         | GQTGGDVNVEMDAAPGVDLSR,VTM<br>QNLNDR,ASLENSLEETKGR,KTEELN<br>K,LEQEIATYR,ILNEMR,TRLEQEIATYR<br>,VFQGLEIELQSQLSMK                                                                                                                                                                                                                                               |                                                                                                                                                                                                                            |
| IPI00230365.5 | Q9QWL7 | Krt17 | Keratin, type I cytoskeletal 17           | TKFETEALR,KNHEEEMNALR,ALEE<br>ANTELEVK,ATMQNLNDR,ADLEMQIE<br>NLKEELAYLK,DAEDWFFSK,NHEEEM<br>NALR,LEQEIATYR,LLEGEDAHLTQYK,<br>EVATNSELVQSGK,VLDELTAR,TMQ<br>ALEIELQSQLSMK,CEMEQQNQYKIL<br>LDVK,GQVGGEINVEMDAAPGVDLSR,<br>ADLEMQIENLK,ADLEMQIENLKEELAY<br>LKK,RTMQALEIELQSQLSMKASLEGS<br>LAETENR,YCVQLSIIQGLIGSVEEQLA<br>QLR,ILVATVDNASILLQIDNAR,TRLEQ<br>EATYR | TMQALEIELQSQLSMK,VLDELTL<br>AR,EVATNSELVQSGK,LAADDFR,<br>LASYLDK                                                                                                                                                           |
| IPI00311493.5 | P05784 | Krt18 | Keratin, type I cytoskeletal 18           | TLQTLIDLDLSDMK,NQNINLENSLGDVE<br>AR,VRPASSAASVYAGAGGSGSR,LQL<br>ETEIEALKEELLFMK,VRPASSAASVYA<br>GAGGSGSRISVSR,AQMEQLNGVLLH<br>LESELAQTR                                                                                                                                                                                                                       | LQLETEIEALK,AQYEALQK,VRPA<br>SSAASVYAGAGGSGSR,AQMEQLN<br>GVLLHLESELAQTR,VVDDTNITR,D<br>AETTLTEL,SVWGGSVGSAGLAG<br>MGGIQTEK,LAADDFR,QSVESDIHG<br>LR,LASYLTK,IVLQIDNAR,NQNINLE<br>NSLGDVEAR,LQLETEIEALKEELLF<br>MK,LEAEIATYR |
| IPI00112947.1 | P19001 | Krt19 | Keratin, type I cytoskeletal 19           | LEQEIATYR,LSVEADINGLR,VLDELTL<br>AR,RTLQGLEIELQSQLSMK,TLQGLEI<br>ELQSQLSMK,ILGATIDNSKIVLQIDNAR<br>K                                                                                                                                                                                                                                                           | YGVQLSIIQSVISGFQAQLSDVR,I<br>EELNTQVAVHSEIQISK,LASYLD<br>K                                                                                                                                                                 |
| IPI00622240.4 | Q3TTY5 | Krt2  | Keratin, type II cytoskeletal 2 epidermal | LSLDVEIATYR,LLRDYQELMNTK,YED<br>EINKR,DYQELMNTK,VDPEIQNVK                                                                                                                                                                                                                                                                                                     | GFSSGSVAVSAGGSR,YEELQVTA<br>VK,KYEDEINKR,FLEQQNQVLR<br>K,DYQELMNTK,VDPEIQNVK,FAS<br>FIDK                                                                                                                                   |
| IPI00462134.3 | Q6IFX3 | Krt40 | Keratin, type I cytoskeletal 40           |                                                                                                                                                                                                                                                                                                                                                               | VRSLEENNAEIECR,LAADDFR                                                                                                                                                                                                     |
| IPI00468696.3 | Q6IFX2 | Krt42 | Keratin, type I cytoskeletal 42           | KNHEEEMNALR,ADLEMQIESLKEELA<br>YLR,GQVGGDVNVEMDAAPGVDLSR,<br>ADLEMQIESLKEELAYLRK,LEQEIATY<br>R,NHEEEMNALR,DAEWWFFTK,TKYE<br>TELNL,ALAEANADLEVK,ILNEMR,VL<br>DELTAR,TRLEQEIATYR                                                                                                                                                                                | ALAEANADLEVK,VLDELTAR,LA<br>ADDFR                                                                                                                                                                                          |



|               |        |       |                                      |                                                                                                                                                                       |                                                                                                                                       |                                                                                                                                                                                                                                                             |
|---------------|--------|-------|--------------------------------------|-----------------------------------------------------------------------------------------------------------------------------------------------------------------------|---------------------------------------------------------------------------------------------------------------------------------------|-------------------------------------------------------------------------------------------------------------------------------------------------------------------------------------------------------------------------------------------------------------|
| IPI00139301.3 | Q922U2 | Krt5  | Keratin, type II cytoskeletal 5      | LALDVEIATYR,LTELEEALQKAK,VDAL<br>MDEINFMK,MFFDAELSQQMTHVSDT<br>SVVLSMDNNR,YEELQQTAGR,YEDEI<br>NKR,NKYEDEINKR,SEIDNVKK,DVDA<br>AYMKN,HEISEMNR,SLDLDSIIAEVK             | LALDVEIATYR,LTELEEALQKAK,L<br>RSEIDNVKK,KYEDINKR,YEELQ<br>QTAGR,AQYEDIANR,NKYEDEIN<br>KR,KDVDAAYMKN,FASFIDK,SEI<br>DNVKK,SLDLDSIIAEVK |                                                                                                                                                                                                                                                             |
| IPI00131368.3 | P50446 | Krt6a | Keratin, type II cytoskeletal 6A     | LALDVEIATYR,TAAENEFVTLK,QCAN<br>LQAAIADAEQR,LEGLEDALQK,YEELQ<br>VTAGR,ALYEAELSQQMTHISDTSVVL<br>SMDNNR,YEDEINKR,AEAESWYQTK,<br>SRAEAESWYQTK,DVDAAYMKN,SLDL<br>DSIIAEVK |                                                                                                                                       |                                                                                                                                                                                                                                                             |
| IPI00406377.3 | Q9DCV7 | Krt7  | Keratin, type II cytoskeletal 7      | LALDIEIATYR                                                                                                                                                           |                                                                                                                                       |                                                                                                                                                                                                                                                             |
| IPI00347110.2 | Q6NXH9 | Krt73 | Keratin, type II cytoskeletal 73     | LALDIEIATYR,NLDLDSIIAEVR,FLEQQ<br>NQVLQTK                                                                                                                             | LALDIEIATYR,NLDLDSIIAEVR,FL<br>EQQNQVLQTK,FASFIDK,KDVDA<br>AYMSK                                                                      |                                                                                                                                                                                                                                                             |
| IPI00221797.1 | Q8BGZ7 | Krt75 | Keratin, type II cytoskeletal 75     | LALDVEIATYR,YEELQVTAGR,MIYEA<br>LSQMQNQVSDTSVVLSDNNR,NMQ<br>EVVEDFK,YEDEINKR,AEAESWYQTK,<br>SRAEAESWYQTK,SLDLDSIIAEVK                                                 |                                                                                                                                       |                                                                                                                                                                                                                                                             |
| IPI00346834.1 | Q3UV17 | Krt76 | Keratin, type II cytoskeletal 2 oral | LALDVEIATYR,AQYEDIAQK,KQNTNM<br>QTSIAEAEQR                                                                                                                            | LALDVEIATYR,AQYEDIAQK,SGA<br>ASGGACGFRSGAGSLGSHSLYS<br>LGGSK,FASFIDK                                                                  |                                                                                                                                                                                                                                                             |
| IPI00462140.1 | Q6IFZ6 | Krt77 | Keratin, type II cytoskeletal 1b     | WELLQQVNTSTR,FLEQQNQVLQTK,Y<br>EDEINKR,NKYEDEINKR,SLDLDSIIDA<br>VR,FLEQQNQVLQTKWELLQQVNTST<br>R                                                                       |                                                                                                                                       |                                                                                                                                                                                                                                                             |
| IPI00124499.2 | Q8VED5 | Krt79 | Keratin, type II cytoskeletal 79     | YEDEINKR,NKYEDEINKR,AEAESWYQ<br>TK,SRAEAESWYQTK,NLDLDSIIAEVK                                                                                                          | KYEDINKR,NKYEDEINKR,FASFI<br>DK,NLDLDSIIAEVK                                                                                          |                                                                                                                                                                                                                                                             |
| IPI00322209.5 | P11679 | Krt8  | Keratin, type II cytoskeletal 8      | LEAELGNMQGLVEDFK,LEGLTDEINF<br>LR,SNMDNMFESYINNLNLR,YEDEINKR,<br>NKYEDEINKR                                                                                           | SLNNKFASFIDK,LALDIEITTYR,LE<br>GLTDEINFLR,KYEDINKR,AQYE<br>DIANR,LVSESSDVVSK,NKYEDEI<br>NKR                                           | ASLEAAIADAEQR,YEELQTLGAK,L<br>AELEAALQR,LLEGEESR,LEGLTDEI<br>NFLR,NKYEDEINK,WSLLQQQK,SF<br>TSGPGAR,FASFIDK,LEVDPNIQAV<br>R,LQAEIEALK,TEISEMNR,LEAELG<br>NMQGLVEDFK,VGSSSSSFR,GSM<br>GTGVGLGGFGGAGVGGITAVTVNQ<br>SLLSPLK,QLEALGQEK,AQYEDIAN<br>R,LVSESSDVVSK |
| IPI00474575.5 |        | Krt81 | keratin complex 2, basic, gene 19    |                                                                                                                                                                       | LCEGVGAVNVCVSSSR,RLLEGE<br>EQR,FAAFIDK,AQYDDIASR                                                                                      |                                                                                                                                                                                                                                                             |
| IPI00331459.1 | Q9Z2T6 | Krt85 | Keratin, type II cuticular Hb5       | LALDIEIATYR                                                                                                                                                           |                                                                                                                                       |                                                                                                                                                                                                                                                             |

|               |        |         |                                                         |                                                                                                                                                   |                                                                                                                                                                                                                                                                                                                                                                                          |
|---------------|--------|---------|---------------------------------------------------------|---------------------------------------------------------------------------------------------------------------------------------------------------|------------------------------------------------------------------------------------------------------------------------------------------------------------------------------------------------------------------------------------------------------------------------------------------------------------------------------------------------------------------------------------------|
| IPI00122559.3 | Q61595 | Ktn1    | Isoform 1 of Kinectin                                   |                                                                                                                                                   | LQTAVSQPNK,AQQSLNSIHSK,<br>KLQTAVSQPNK,ACVAGTSDAE<br>AVK,IETDKENAEVK,ENEVQSLH<br>SK,TAEHEAAQQDLQSK,GELSGL<br>LHQLQEK,LLEEQLQHEVASK,LF<br>PTVSVPSNLNYSEWLR,SVEELLE<br>VELLK                                                                                                                                                                                                               |
| IPI00378700.2 | Q587J6 | L1td1   | LINE-1 type transposase domain-<br>containing protein 1 |                                                                                                                                                   | LSALSQVTPLLTNI EK,IGQQEGDA<br>ISERPKEGK,IFFDIEEFK,IASD<br>SLSFLFIK,EKELEPELQCSVK,AP<br>KESPPEGGAGATLRLAADFSAAT IGQQEGDAISER,LSALSQVTPLLTNI<br>LDVGR,ELAFSYLVWDSK,ESPPE EK,PLNSSHV LK,LTADLSPGTIDAR,<br>GGAGATLR,VSEQEDAVEGLTK,Y VPQTEETAK,AKPLNSSHV LK,KTA<br>KVPQTEETAK,EVIEENFAELED SQTKK,ILQDEGFQPR,ETFHGLK<br>QSLEIVSAHR,LTADLSPGTIDAR,<br>LAADFSAAATLDVGR,EVEVASPEV<br>K,ILQDEGFQPR |
| IPI00676957.3 | A2ABW7 | Lama5   | laminin, alpha 5 precursor                              |                                                                                                                                                   | VVLEVASEAGR,AIQVFLLAGNR                                                                                                                                                                                                                                                                                                                                                                  |
| IPI00338785.3 |        | Lamb1-1 | laminin B1 subunit 1                                    |                                                                                                                                                   | VETLSQVEVILQQSAADIAR,NFLT<br>EDSADLDSIEAVANEVLK                                                                                                                                                                                                                                                                                                                                          |
| IPI00400016.1 | P02468 | Lamc1   | Laminin subunit gamma-1                                 |                                                                                                                                                   | NSVSSLLSQLNNLLDQLGQLDTV<br>DLNK,LSAEDLVLEGAGLR,EVVC<br>THCPTGTAGK                                                                                                                                                                                                                                                                                                                        |
| IPI00331436.4 | Q9CPY7 | Lap3    | Isoform 1 of Cytosol aminopeptidase                     | TLIEFLLR,SWIEEQEMGSFSLVAK,GS<br>EPPVFLEIHYMGSPNATEAPLVFVGK<br>,WAHLDIAGVMTNKDEIPYLR,TFYGLH<br>QDFPSVVVGLGK,DKDDLPQFTSA<br>GESFNK                  | TLIEFLLR,GLVLGIYAK,LFEASVE<br>TGDR,LNLPINIIGLAPLCENMPSG<br>K,GSEPPVFLEIHYMGSPNATEA<br>PLVFVGK,FAEIEK,TFYGLHQDF<br>PSVVVGLGK,LILADALCYAHTF<br>NPK<br>GITFDSGGISIK,GLVLGIYAK,LNLPI<br>NIIGLAPLCENMPSGK,QVIDCQLAD<br>VNNLGK,LFEASVETGDR,TIQVDNT<br>DAEGR,GVLFASGQNLAR,LILADAL<br>CYAHTFNPK                                                                                                  |
| IPI00344088.6 |        | Larp1   | la related protein                                      | FSHPTALPQQQLPSQQLMSK,SLPTTVP<br>ESPNYR,QIEYYFSVDNLER,VINDGLF<br>YYEQDLWTEK,EKLASR,DYEAGQLYG<br>LEK,LFGAPEPSTIAR,VQALTTDISLIFA<br>ALK,ILIVTQTPPYMR | PATGISQPPTTPTGQATR,VQALT<br>TDISLIFAALK,KFDGTEGPR                                                                                                                                                                                                                                                                                                                                        |
| IPI00278107.4 | Q8BVS5 | Larp2   | Putative uncharacterized protein                        | MDEQGFPLPISLIAGFHR,VQALTTNLNLI<br>LEALK                                                                                                           |                                                                                                                                                                                                                                                                                                                                                                                          |
| IPI00828620.1 | Q8BWW4 | Larp4   | La-related protein 4                                    | LTTNTDLILEVLR,SSSGSEHSTEGSVS<br>LGDGPLSR,EAPILQMEQNGDFGR,FD<br>LLATNFPPLPGSSSR                                                                    | EIPETTPVEEVK,IPRPQAATEAK                                                                                                                                                                                                                                                                                                                                                                 |
| IPI00620564.3 | Q6A0A2 | Larp5   | Isoform 1 of La-related protein 4B                      | AIAINTFLPK,NLSTDASTNTVPVVGPR,<br>LSTDVDLIVEVLR,EISESTPVEEVEALF<br>K                                                                               |                                                                                                                                                                                                                                                                                                                                                                                          |
| IPI00340860.5 | Q05CL8 | Larp7   | Isoform 1 of La-related protein 7                       | HSWNLEVLVSGDHEQR,TPEDAQAVMN<br>AQTEIR,DKVEASSLPEAR,VSAQGPQ<br>FVTGVIVK,FKTPEDAQAVMNAQTEIR,<br>AIEFLNPPPEEAPR                                      |                                                                                                                                                                                                                                                                                                                                                                                          |

|               |          |         |                                            |                                                                                     |                                                                                                                                                                                                                                                                                                                                               |                                                                                                                                                  |
|---------------|----------|---------|--------------------------------------------|-------------------------------------------------------------------------------------|-----------------------------------------------------------------------------------------------------------------------------------------------------------------------------------------------------------------------------------------------------------------------------------------------------------------------------------------------|--------------------------------------------------------------------------------------------------------------------------------------------------|
| IPI00453819.2 | Q8BMJ2   | Lars    | Leucyl-tRNA synthetase, cytoplasmic        | GTGVVTSVPSDSPDDLAALR,VIASEL<br>GSLPELK,GFYDGVMLVDGFK,VVYVL<br>PMLTIK,STGNFLTLSQAVDK | GTGVVTSVPSDSPDDLAALR,VIA<br>SELGSLPELK,FGIRDDMVLPEFEP<br>VPVLEIPGIGNLPAVTVCDDELK,RV<br>PVLGR,VFEVSASR,TLISENAVFH<br>VDLVSK                                                                                                                                                                                                                    | GTGVVTSVPSDSPDDLAALR,VIASE<br>LGSLPELK,FSEAEHWLDYFPPLAV<br>QDLK,RVPVLGR                                                                          |
| IPI00462502.3 | A2BE28   | Las1l   | LAS1-like                                  |                                                                                     |                                                                                                                                                                                                                                                                                                                                               | LIDAAGTLGTDELRL,HLLQAIK,LGNE<br>LPLAVASTADLVR                                                                                                    |
| IPI00125091.1 | Q61792   | Lasp1   | LIM and SH3 domain protein 1               | TGDTGMLPANYVEAI,QSFTMVADTPE<br>NLR,GFSVVADTPELQR                                    |                                                                                                                                                                                                                                                                                                                                               | TQDQISNIK,GFSVVADTPELQR,KP<br>YCNAHYPK,QQSELQSQVR                                                                                                |
| IPI00331173.8 | Q3U9G9   | Lbr     | Lamin-B receptor                           |                                                                                     | GPAPLGTQVTTTPQR,VAEGTPL<br>VDGR,FVEGEVVR,EIESEEQNLV<br>TK                                                                                                                                                                                                                                                                                     |                                                                                                                                                  |
| IPI00751369.1 |          | Ldha    | lactate dehydrogenase A isoform 2          | GYTSWAIGLSVADLAESIMK,LLIVSNP<br>VDILTYVAWK,DQLIVNLLK                                | GLYGINEDVFLSVPCILGQNGISD<br>VVK,DLADELALVDVMEDK,LVIIT<br>AGAR,SLNPELGTADKEQWK,YL<br>MGER,LLIVSNPVDILTYVAWK,VT<br>LTPEEAR,RVHPISMIK,LGVHA<br>LSCHGWVLGEHGDSSVPVWSGV<br>NVAGVSLK,FIIPNIVK,DQLIVNLLK<br>,GEMMDLQHGSLFLK,ITVVGVA<br>VGMACAISILMK,GYTSWAIGLSV<br>ADLAESIMK,VIGSGCNLDSAR,SA<br>DTLWGIQK,LKGEMMDLQHGSLF<br>LK,DYCVTANSK,QVVD SAYEVIK | GLYGINEDVFLSVPCILGQNGISDVV<br>K,VIGSGCNLDSAR,LVIITAGAR,YL<br>MGER,LLIVSNPVDILTYVAWK,SAD<br>TLWGIQK,RVHPISMIK,DQLIVNLL<br>K,FIIPNIVK,QVVD SAYEVIK |
| IPI00229510.5 | P16125   | Ldhb    | L-lactate dehydrogenase B chain            |                                                                                     | LKDDEVAQLR,GYTNWAIGLSVA<br>DLIESMLK,IVADKDYSVTANSK,VI<br>GSGCNLDSAR,LIASVADDEAAVP<br>NNK,IVVVTAGVR,FIIPQIVK,GLTS<br>VINQK,SLADELALVDVLEDK                                                                                                                                                                                                     | GYTNWAIGLSVADLIESMLK,VIGSG<br>CNLDSAR,LIASVADDEAAVPNNK,IT<br>VVGQVGMACAISILGK,IVVVTAG<br>VR,FIIPQIVK,GLTSVINQK,SLADELA<br>LVDVLEDK,MVVD SAYEVIK  |
| IPI00624364.3 | Q3V0V0   | Ldlrad2 | Putative uncharacterized protein           |                                                                                     |                                                                                                                                                                                                                                                                                                                                               | MDNCGDGSQDSRPPASCGGPSL<br>VPK,EMGTLEDNSSK                                                                                                        |
| IPI00229517.5 | P16045   | Lgals1  | Galectin-1                                 |                                                                                     |                                                                                                                                                                                                                                                                                                                                               | SFVLNLGK,DSNNLCLHFNPR,MAC<br>GLVASNLNLLK,FNAHGDANTIVCNT<br>K                                                                                     |
| IPI00348910.2 | Q61211-2 | Lgtn    | Isoform 2 of Ligatin                       |                                                                                     |                                                                                                                                                                                                                                                                                                                                               | ADVTAAFPALGTDQISELIPGKEELN<br>VVK,APVAIGVAAMSTAQMLASGLK                                                                                          |
| IPI00263557.4 | P50481-2 | Lhx3    | Isoform LIM3B of LIM/homeobox protein Lhx3 |                                                                                     |                                                                                                                                                                                                                                                                                                                                               | CAACQLGIPPTQVVR,RAQDFVYHL<br>HCFACVVCK,CAACQLGIPPTQVVR<br>R                                                                                      |
| IPI00117104.1 | Q99M04   | Lias    | Lipoyl synthase, mitochondrial             | EFLHNGPDLQDFVSGDLADK,VGNEL<br>GFLYTASGPLVR                                          |                                                                                                                                                                                                                                                                                                                                               |                                                                                                                                                  |
| IPI00473314.3 | Q3U4X8   | Lig1    | DNA ligase I                               |                                                                                     | LKPQEEEQSKPPAR,AQIHVLEGG<br>EVK,SVVALSPDLLPVLYLSLNR                                                                                                                                                                                                                                                                                           |                                                                                                                                                  |

|               |        |              |                                                    |                                                                                                                                                                                          |                                                                                                                                                                                                                                                                                                                                                        |
|---------------|--------|--------------|----------------------------------------------------|------------------------------------------------------------------------------------------------------------------------------------------------------------------------------------------|--------------------------------------------------------------------------------------------------------------------------------------------------------------------------------------------------------------------------------------------------------------------------------------------------------------------------------------------------------|
| IPI00170180.5 | Q8K3Y3 | Lin28        | Lin-28 homolog A                                   | AAEKAPEEAPPDAAR,AGVALDPPVDV<br>FVHQSK,APEEAPPDAAR,PAYFREEE<br>EEIHSPALLPEAQN,MFGFLSMTAR                                                                                                  |                                                                                                                                                                                                                                                                                                                                                        |
| IPI00112043.2 | Q9D945 | Llph         | Isoform 1 of Protein LLP homolog                   | VDGDALMKDVEEIIATVVVAK,DVEEIIAT<br>VVVAK,TLLDQHQGYPPVWMNQR,VDG<br>DALMKDVEEIIATVVVAKPR                                                                                                    |                                                                                                                                                                                                                                                                                                                                                        |
| IPI00620256.3 | P48678 | Lmna         | Isoform A of Lamin-A/C                             | IDLSAQLSQLQK,SVGGSGGGSGFD<br>NLVTR,SLTMVEDNEDDDDEGEELLH<br>HHR,DLEALLNSK,MQQQLDEYQELLDI<br>K,LKDLEALLNSK,NSNLVGAHEELQQ<br>SR,AAGGAGAQVGGSSISSGSSASSVT<br>VTR,EMAEMRARMQQQLDEYQELLDI<br>K |                                                                                                                                                                                                                                                                                                                                                        |
| IPI00230394.5 | P14733 | Lmnb1        | Lamin-B1                                           | NTSEQDQPMGGWEMIR,LALDMEISA<br>YR,SLEGDLEDLKDQIAQLEASLSAAK,<br>SLETENSALQLQVTER,ALYETELADA<br>R,DQMQQQLSDYEQLLDVK,TTIPEEE<br>EEEEEPGVAVEEER,IESLSSQLSNL<br>QK,EMAEIRDQMQQQLSDYEQLLDVK     | KESDLSGAQIK,ALYETELADAR,I<br>GDTSVSYK,TTIPEEEEEEEEEPIG<br>VAVEEER,LAQALHEMR,IESLSS<br>QLSNLQK,LYKEELEQTYHAK,LAL<br>DMEISAYR,KLLEGEER,SLETEN<br>SALQLQVTER,SLEGDLEDLKDQI<br>AQLEASLSAAK,SLETENSALQLQ<br>VTEREEVR,LREYEAALNSK,DA<br>LATALGDKK,LSSEMNTSTVNSAR<br>,LLEGEER,FKAEHDQLLNYAK,<br>KIGDTSVSYK,NQNSWGTGEDVK,<br>ASAPATPLSPTR,LAVYIDK,LQEK<br>EELR |
| IPI00126191.5 | P21619 | Lmnb2        | Isoform B2 of Lamin-B2                             | LALDMEISAYR,ATSSSSSSSGVGM<br>SQGR,VESLSYQLLGLQK                                                                                                                                          | KLLEGEER,LALDMEISAYR,LLE<br>GEEER,LQIEIGK,RLVEVDSSR,V<br>QAELEEAR,VELEQTYQAK,ISEKE<br>EVTTTR,LQEKEELR                                                                                                                                                                                                                                                  |
| IPI00331707.1 | Q8JZK9 | LOC100040592 | Hydroxymethylglutaryl-CoA synthase,<br>cytoplasmic |                                                                                                                                                                                          | PTGGVGAVALLIGNAPLIFDR,VT<br>QDATPGSALDK                                                                                                                                                                                                                                                                                                                |
| IPI00831151.2 |        | LOC100043977 | similar to Igh protein                             | QFLYIVDLTGKGLLEEDFK,GLLEEDFK<br>TVILVDTHGDLHR                                                                                                                                            |                                                                                                                                                                                                                                                                                                                                                        |
| IPI00330862.5 | P26040 | LOC100044177 | Ezrin                                              | FYPEDVAEELIQDITQK,APDFVYAPR,<br>QLLTLSNELSQAR,IGFPWSEIR,AKFY<br>PEDVAEELIQDITQK,GTDLWLGVDAL<br>GLNIYEK,IAQDLEMYGINYFEIK,SQEQ<br>LAELA EY TAK                                             | ALQLEER,IQVWHAHR,FYPED<br>VAEELIQDITQK,APDFVYAPR,IA<br>QDLEMYGINYFEIK,VSAQEV R,S<br>QEQLAAELAEY TAK,RAQEEAER,<br>LFFLQVK,KENPVQFK,IGFPWSEI<br>R,GTDLWLGVDALGLNIYEK,FVIK<br>PIDK,RKPDTIEVQQMK,EVWYFG<br>LQYVDNK                                                                                                                                         |

|               |        |              |                                                                         |                                                                                                                                                                                                                                                                                                                                                                                                                                                                                                                                                                                                                                                                                                                                                                                                                                                                                                                        |                                                                                                                                                                                                                                                                                                                |
|---------------|--------|--------------|-------------------------------------------------------------------------|------------------------------------------------------------------------------------------------------------------------------------------------------------------------------------------------------------------------------------------------------------------------------------------------------------------------------------------------------------------------------------------------------------------------------------------------------------------------------------------------------------------------------------------------------------------------------------------------------------------------------------------------------------------------------------------------------------------------------------------------------------------------------------------------------------------------------------------------------------------------------------------------------------------------|----------------------------------------------------------------------------------------------------------------------------------------------------------------------------------------------------------------------------------------------------------------------------------------------------------------|
| IPI00462072.3 | P17182 | LOC100044223 | Alpha-enolase                                                           | KVNVVEQEKIDK,SGETEDTFIADLVVG LAQSNWGWVMVSHR,SGETEDT<br>LCTGQIK,LAQSNWGWVMVSHR,VNVV FIADLVVGLCTGQIK,KVNVVEQE<br>EQEKIDKLMIEMDGTENK,GVSQAVEH KIDK,GVSQAVEHINK,IEEELGSK,<br>INK,LAMQEFMILPVGASSFR,SFVQNY LAMQEFMILPVGASSFR,SFVQNY<br>PVVSIEDPFDQDDWGAWQK,AAVPSG PVVSIEDPFDQDDWGAWQK,KVN<br>ASTGIYEALELRDNDK,GVSQAVEHIN VVEQEK,SGKYDLDFK,EALELLK,<br>KTIAPALVSK,YITPDQLADLYK,DATNV YITPDQLADLYK,SCNCLLLK,DAT<br>GDEGGFAPNILENK,IDKLMIEMDGTE NVGDEGGFAPNILENK,LMIEMDG<br>NK,YGKDATNVGDEGGFAPNILENK,HI TENK,HIADLAGNPEVILPVPFNV<br>ADLAGNPEVILPVPFNVINGGSHAGN INGGSHAGNK,VNVVEQEK,YDL<br>K,LMIEMDGTENK,YGKDATNVGDEGG FK,FGANAILGVSLAVCK,AAVPSG<br>FAPNILENKEALELLK,AAVPSGASTGI ASTGIYEALELR,DATNVGDEGGF<br>YEALELR,DATNVGDEGGFAPNILENK APNILENKEALELLK,GNPTVEVDL<br>EALELLK,IGAEVYHNLK,FTASAGIQVV YTAK,IGAEVYHNLK,FTASAGIQV<br>GDDLTVTNP,K,FTASAGIQVVGDDLTV VGDDLTVTNP,K,AGYTDQVVIGM<br>TNP,K,AGYTDQVVIGMDVAASEFYR DVAASEFYR | LAQSNWGWVMVSHR,SGETEDTFI<br>ADLVVGLCTGQIK,GVSQAVEHINK,<br>LAMQEFMILPVGASSFR,IEEELGSK<br>,SFVQNYPVVSIEDPFDQDDWGAW<br>QK,KVNVVEQEK,SCNCLLLK,YITPD<br>QLADLYK,HIADLAGNPEVILPVPFNV<br>INGGSHAGNK,VNVVEQEK,YDL<br>DFK,FGANAILGVSLAVCK,AAVPSG<br>ASTGIYEALELR,GNPTVEVDLYTAK<br>,IGAEVYHNLK,FTASAGIQVVGDDL<br>TVTNP,K |
| IPI00321923.5 | Q8K1R3 | LOC100044383 | Isoform 1 of Polyribonucleotide nucleotidyltransferase 1, mitochondrial | YTQIIQGIQQLVK,GITALQADIK,<br>KENGPPVETVK                                                                                                                                                                                                                                                                                                                                                                                                                                                                                                                                                                                                                                                                                                                                                                                                                                                                               |                                                                                                                                                                                                                                                                                                                |
| IPI00850753.1 |        | LOC100044395 | similar to RNA binding protein gene with multiple splicing              | GYEGSLIK,TLFVSGPLDIKPR,LVGTP<br>NPSTPLPNTVPQFIAR                                                                                                                                                                                                                                                                                                                                                                                                                                                                                                                                                                                                                                                                                                                                                                                                                                                                       |                                                                                                                                                                                                                                                                                                                |
| IPI00124149.1 | P61971 | LOC100044514 | Nuclear transport factor 2                                              | TQLGAIYIDASCLTWEGQQFQGK,<br>LSSLPFQK,LALHNFG,IQHSITAQ<br>DHQPTPDSCIISMVVGQLK                                                                                                                                                                                                                                                                                                                                                                                                                                                                                                                                                                                                                                                                                                                                                                                                                                           |                                                                                                                                                                                                                                                                                                                |
| IPI00119581.2 | P35550 | LOC100044829 | rRNA 2'-O-methyltransferase fibrillar                                   | VLYLGAASGTTVSHVSDIVGPDGLVYA<br>VEFSHR,LAAAILGGVDQIHIK,DHAVVV<br>GVYRPPPK,VSISEGDDKIEYR,MLIAM<br>VDVIFADVAQPDQTR,LAAAILGGVDQI<br>HIKPGAK,DLINLAK,MQQENMKPQEQ<br>LTLEPYER                                                                                                                                                                                                                                                                                                                                                                                                                                                                                                                                                                                                                                                                                                                                                | DHAVVGVYRPPPK,LAAAILGGVD<br>QIHIK,GKEDALVTK,IVALNAHTFLR,<br>MLIAMVDVIFADVAQPDQTR,TNIIPV<br>IEDAR,LAAAILGGVDQIHIKPGAK,N<br>GGHFVISIK,NLVPGESVYGEK,HEG<br>VFICR                                                                                                                                                  |
| IPI00317752.2 | Q9D7F7 | LOC100044854 | Charged multivesicular body protein 4c                                  | VQFADGFDEAEELAELEEELEQEELNKK<br>,MTSLELPNVSSSLPAQPSR,QLTQV<br>DGTLSSTIEFQR                                                                                                                                                                                                                                                                                                                                                                                                                                                                                                                                                                                                                                                                                                                                                                                                                                             |                                                                                                                                                                                                                                                                                                                |
| IPI00850433.1 |        | LOC100044980 | similar to Thoc7 protein                                                | QFHVLLSTIHELQQTLENDK,LSEVDE<br>AQESTMEADPKP                                                                                                                                                                                                                                                                                                                                                                                                                                                                                                                                                                                                                                                                                                                                                                                                                                                                            |                                                                                                                                                                                                                                                                                                                |
| IPI00848728.1 |        | LOC100045132 | similar to polyglutamine-containing protein                             | EAAAAAAAAQQQQQQQQQQQQQLN<br>HVDGSTK,LPNGLGGPNGFPKPAPEE<br>GPELNR,APSAPPGTGALPPAAPTG<br>R,NAEALAELESER,YGLSAAAAAAAA<br>AAAVEQR                                                                                                                                                                                                                                                                                                                                                                                                                                                                                                                                                                                                                                                                                                                                                                                          |                                                                                                                                                                                                                                                                                                                |
| IPI00474487.1 |        | LOC100045157 | hypothetical protein                                                    | EELSNVLAAMR,YPMAVGLNK,REELS<br>NVLAAMR,KREELSNVLAAMR                                                                                                                                                                                                                                                                                                                                                                                                                                                                                                                                                                                                                                                                                                                                                                                                                                                                   | YPMAVGLNK,EELSNVLAAMR,EVC<br>GFAPYER                                                                                                                                                                                                                                                                           |

|               |        |              |                                                                              |                                                                                                                                                                                                                                                                            |                                                                                                                                                                                                    |                                                                                                                                           |
|---------------|--------|--------------|------------------------------------------------------------------------------|----------------------------------------------------------------------------------------------------------------------------------------------------------------------------------------------------------------------------------------------------------------------------|----------------------------------------------------------------------------------------------------------------------------------------------------------------------------------------------------|-------------------------------------------------------------------------------------------------------------------------------------------|
| IPI00849786.1 |        | LOC100045189 | similar to transcription factor EF1                                          | GAEAANVTGPGGVPVQGSK,EDGNEE<br>DKENQGDDETQGGQPPQR,NFNRYR,RP<br>ENPKPQDQK,EDVVFVHQTAIK,RFPPY<br>YMR,NYQQNYQNSSEGEK,NEGSESA<br>PEGQAQQR,SVGDGETVEFDVVEGEK<br>,NDTKEDVVFVHQTAIK,RPQYSNPPVQ<br>GEVMEGADNQGAGEQGR                                                                | GAEAANVTGPGGVPVQGSK,ED<br>VHQTAIK,ENQGDDETQGGQPPQR,N<br>YQQNYQNSSEGEK,NEGSESAPEG<br>QAQQR,RPQYSNPPVQGEVMEGA<br>DNQGAGEQGR                                                                          |                                                                                                                                           |
| IPI00853914.1 |        | LOC100045191 | similar to heterogeneous nuclear<br>ribonucleoprotein A2/B1                  | EESGKPGAHVTVK,IDIETITDR,GFGF<br>VTFDDHDPVDK,DYFEEYGKIDTIEIITD<br>R,GFGFVTFDDHDPVDKIVLQK,DYFEE<br>YGK,YHTINGHNAEVR,LFIGGLSFETT<br>EESLR,SGNFGGSR,PHSIDGR,GFGFV<br>TFSSMAEVDAAMAAR,GGNFGFGDSR<br>,EKEQFR,GGGNFGPGPGSNFR,RGF<br>GFVTFDDHDPVDK,EDTEEHHLR,KLFI<br>GGLSFETTEESLR | YHTINGHNAEVR,LFIGGLSFETTE<br>ESLR,EESGKPGAHVTVK,IDIETII<br>TDR,GFGFVTFDDHDPVDK,PGA<br>HVTVK,LTDCVVMR,GGNFGFGD<br>SR,NMGGPYGGNYGPGGSGGS<br>GGYGGR,GGGNFGPGPGSNFR<br>,DYFEEYGK,KLFIGGLSFETTEES<br>LR | YHTINGHNAEVR,EESGKPGAHVTV<br>K,IDIETITDR,QEMQEVQSSR,PGA<br>HVTVK,LTDCVVMR,GGGNFGPG<br>PGSNFR                                              |
| IPI00848537.1 |        | LOC100045253 | similar to Scoc protein                                                      | LKSENQVLGQYIENLMSASSVFQTTDT<br>K,LINQVLELQHTLEDLSAR                                                                                                                                                                                                                        |                                                                                                                                                                                                    |                                                                                                                                           |
| IPI00785343.2 | P84244 | LOC100045490 | Histone H3.3                                                                 |                                                                                                                                                                                                                                                                            | FQSAAIGALQEASEAYLVGLFEDT<br>NLCAIHAK,YRPGTVALR,EIAQDF<br>K,STELLIR                                                                                                                                 |                                                                                                                                           |
| IPI00848492.1 |        | LOC100045699 | similar to Electron transferring<br>flavoprotein, beta polypeptide isoform 2 |                                                                                                                                                                                                                                                                            | VETTEDLVAK,VDLLFLGK                                                                                                                                                                                | LPAVVTADLR,SGVVTDGVK,GIHVEI<br>PGAQAESLGPLQVAR                                                                                            |
| IPI00849741.1 |        | LOC100045848 | similar to BUD31 homolog (S.<br>cerevisiae) isoform 1                        | APPDGWELIEPTLDELQK,VESLWPI<br>FR,YIFDLFYK,KAPPDGWELIEPTLDEL<br>DQK                                                                                                                                                                                                         |                                                                                                                                                                                                    |                                                                                                                                           |
| IPI00265239.1 |        | LOC100045925 | similar to cytochrome c                                                      | GITWGEDTLMEYLENPK,TGPNLHGLF<br>GR,GITWGEDTLMEYLENPKK                                                                                                                                                                                                                       |                                                                                                                                                                                                    |                                                                                                                                           |
| IPI00118447.1 | P42669 | LOC100045958 | Transcriptional activator protein Pur-<br>alpha                              | FFFDVGSNK,LIDDYGVEEPAELPEG<br>TSLTVDNK,GPGLGSTQGQTIALPAQG<br>LIEFR                                                                                                                                                                                                         |                                                                                                                                                                                                    |                                                                                                                                           |
| IPI00134621.3 | P62827 | LOC100045999 | GTP-binding nuclear protein Ran                                              | FNVWDTAGQEK,YVATLGVEVHPLVF<br>HTNR,NLQYYDISAK,SNYNFEKPFLWL<br>AR                                                                                                                                                                                                           | VCENIPIVLCGNK,HLTGEFEKK,K<br>YVATLGVEVHPLVFHTNR,FNVW<br>DTAGQEK,YVATLGVEVHPLVFHT<br>NR,HLTGEFEK,LVLVGDGGTGK,<br>NLQYYDISAK,SNYNFEKPFLWLA<br>R                                                      | VCENIPIVLCGNK,SIVFHR,PFLWLA<br>R,FNVWDTAGQEK,YVATLGVEVHP<br>LVFHTNR,SNYNFEK,HLTGEFEK,LV<br>LVGDGGTGK,NLQYYDISAK,NVFN<br>WHR,SNYNFEKPFLWLR |
| IPI00116154.2 | Q9D881 | LOC100046079 | cytochrome c oxidase, subunit Vb                                             |                                                                                                                                                                                                                                                                            | EDPNLVPSISNK,EIMIAAQK                                                                                                                                                                              |                                                                                                                                           |
| IPI00154004.1 | Q7TQI3 | LOC100046081 | Ubiquitin thioesterase OTUB1                                                 |                                                                                                                                                                                                                                                                            | KYSYIR,LLTSGYLQR,IQQEIAVQNP<br>LVSER                                                                                                                                                               |                                                                                                                                           |
| IPI00850217.1 |        | LOC100046119 | similar to ubiquitin-conjugating enzyme<br>E2 UbcH-ben                       |                                                                                                                                                                                                                                                                            | LLAEPVPGIK,YFHVVIAGPQDSPF<br>EGGTFK,TVLLSIQALLSAPNPDD<br>PLANDVAEQWK,TNEAQAIETAR                                                                                                                   | IYHPNVDK,LLAEPVPGIK,ICLDILK,<br>WSPALQIR,TNEAQAIETAR                                                                                      |

|               |        |              |                                                                                          |                                                                                                        |                                                                                                                                                                                                                                                                           |                                                                                                                                                                                                                                   |
|---------------|--------|--------------|------------------------------------------------------------------------------------------|--------------------------------------------------------------------------------------------------------|---------------------------------------------------------------------------------------------------------------------------------------------------------------------------------------------------------------------------------------------------------------------------|-----------------------------------------------------------------------------------------------------------------------------------------------------------------------------------------------------------------------------------|
| IPI00850430.1 |        | LOC100046151 | similar to Solute carrier family 25 (mitochondrial carrier, phosphate carrier), member 3 |                                                                                                        | IQTQPGYANTLR,GIFNGFSITLK,Y YALCGFGGVLSCGLTHTAVVPLD LVK,GSTASQVLQR,FGFYEVFK,F ACFER,TVEALYK,ALYSNILGEEN TYLWR                                                                                                                                                              | IQTQPGYANTLR,GIFNGFSITLK,YY ALCGFGGVLSCGLTHTAVVPLDLVK ,GSTASQVLQR,LPRPPPEMPESL K,MQVDPQK,TVEALYK                                                                                                                                  |
| IPI00848890.1 |        | LOC100046167 | similar to Chain B, Crystal Structure Of Sumo-3-Modified Thymine-Dna Glycosylase         |                                                                                                        | TENNDHINLK,VAGQDGSVVQFK                                                                                                                                                                                                                                                   | TENNDHINLK,VAGQDGSVVQFK                                                                                                                                                                                                           |
| IPI00854971.1 |        | LOC100046302 | similar to Protein disulfide isomerase associated 6                                      | GSFSEQGINEFLR,HQSLGGQYGVQG FPTIK,NLEPEWAAAATEVK,DVVELTD DTFDK,AAVDATVNQVLASR,TGEAIV DAALSALR,NSYLEVLLK | NKPEDYQGGR,ALDLFSDNAPPP ELLEIINEDIAK,AAVDATVNQVLA SR,TGEAIVDAALSALR,NSYLEV LK                                                                                                                                                                                             | HQSLGGQYGVQGFPTIK,GSFSEQ GINEFLR,NLEPEWAAAATEVK,ALD LFSDNAPPPELLEIINEDIAK,AAVD ATVNQVLASR,TGEAIVDAALSALR                                                                                                                          |
| IPI00131459.1 | P15532 | LOC100046344 | Nucleoside diphosphate kinase A                                                          | YMHSGPVVAMVWEGLNVVK,VMLGE TNPADSKPGTIR,EISLWFQPEELVEYK                                                 | NIIHGSDSVK,GDFCIQVGR,GLVG EIIKR,VMLGETNPADSKPGTIR,D RPFFTGLVK,FLQASEDLLK,GLVG EIIK,TFIAIKPDGVQR,EISLWFQPEELVEYK                                                                                                                                                           | NIIHGSDSVK,GDFCIQVGR,VMLGE TNPADSKPGTIR,DRPFFTGLVK,FL QASEDLLK,GLVGEIIK,EHYTDLK,TF IAIKPDGVQR,EISLWFQPEELVEYK                                                                                                                     |
| IPI00330303.7 | Q9CWJ9 | LOC100046995 | Bifunctional purine biosynthesis protein PURH                                            | WEALFEEVPELLTEAEK,LSGVSVSSD AFFPFR,WEALFEEVPELLTEAEKK                                                  | VVIEACDELGIVLAHTDLR,LPITVL NGAPGFINLCDALNAWQLVTEL, DLIVATVAVK,AEISNAIDQYVTGTI GEGEDLVK,LSGVSVSSDAFFPF R,NIPEDAADMAR,TGLVEFAR,HV SPAGAAVGVPLSEDEAR,TVASP DVTVEAAVEQIDIGGVTLR,GAV DIPAAASFV,DGQVIGIGAGQQSR, TLHPAVHAGILAR,VCMVYDLYPT LTPLAVAYAR,LDLNLVLR,SLASLG LSLVASGGTAK | YQNSVVCYAK,LPITVLNGAPGFIN LCDALNAWQLVTEL,AEISNAIDQY VTGTIGEGEDLVK,LSGVSVSSDAFF PFR,HVSPAGAAVGVPLSEDEAR,R NNGVVDK,SLFSNIVTK,WEALFEEV PELLTEAEK,GAVDIPAAASFV,VV CNLYPFVK,TLHPAVHAGILAR,DVS ELTGFPEMLGGR,LDLNLVLR,SLASL GLSLVASGGTAK |
| IPI00129466.1 | P83917 | LOC100047028 | Chromobox protein homolog 1                                                              | KKVEEVLEEEEEYVVEK,NSDEADLV PAK,VEEVLEEEEEYVVEK,KVEEVLE EEEEEYVVEK,IIGATDSSGELMFLMK                     | NSDEADLVPAK,KKVEEVLEEEEE EYVVEK,GFSDENTWEPEENLD CPDLIAEFLQSQK,KVEEVLEEEEE EEYVVEK,IIGATDSSGELMFLMK                                                                                                                                                                        |                                                                                                                                                                                                                                   |
| IPI00750945.2 |        | LOC100047199 | Isoform 1 of Outer dense fiber protein 2                                                 | KEELEVAHELAETEHEENTVLR,NIDLT AIISDLR,DLYVAEALSTLESWR,LMEQ QGTLLK,QFQSQLADLQQLPDILK                     |                                                                                                                                                                                                                                                                           |                                                                                                                                                                                                                                   |
| IPI00115831.1 | O55128 | LOC100047209 | Histone deacetylase complex subunit SAP18                                                | GTHFNFAIVFMDLK,VKEIGSTMSGR,F QIGDYLDIAITPPNR                                                           |                                                                                                                                                                                                                                                                           |                                                                                                                                                                                                                                   |
| IPI00849478.1 |        | LOC100047252 | similar to Phosphoserine aminotransferase 1 isoform 1                                    |                                                                                                        | IIGNTENLVR,DDLLGFSLR,VIFVQ GGGSGQFSAVPLNLIGLK,GLGIS VLEMSHR,ASLYNAVTTEDVEK,A VELNMISLK,NVGSAGVTVIVR,F GVIFAGAQQ,KFGTVNIVHPK,LPH SVLLEIQK,ELLAVPNNYK                                                                                                                       | IIGNTENLVR,VIFVQGGGSGQFSAV PLNLIGLK,GAVLVCDMSSNFLSR,F GVIFAGAQQ,FGTVNIVHPK,LPHS VLLEIQK,ELLAVPNNYK                                                                                                                                |

|               |          |              |                                                              |                                                                                                                                                                                     |                                                                                                         |
|---------------|----------|--------------|--------------------------------------------------------------|-------------------------------------------------------------------------------------------------------------------------------------------------------------------------------------|---------------------------------------------------------------------------------------------------------|
| IPI00849074.1 |          | LOC100047305 | similar to 40S ribosomal protein S28                         |                                                                                                                                                                                     | EGDVLTLLESER,TGSQQGCTQV<br>R,VEFMDDTSR,VTKVLGR                                                          |
| IPI00755226.2 |          | LOC100047311 | similar to protein translocation complex beta subunit        |                                                                                                                                                                                     | FYTEDSPGLK,TTSAGTGGMWR                                                                                  |
| IPI00462008.5 |          | LOC100047352 | similar to Glyceraldehyde-3-phosphate dehydrogenase          | WGKAGAEYVVESTGVFTTMEK,VVDL<br>MAYMASK,IVSNASCTTNCLAPLAK,LI<br>SWYDNEYGYNSR,VIHDNFGIVEGLMT<br>TVHAITATQK,LVINGKPITIFQER,PITIF<br>QER,VEIVAINDPFIDLNYMVMFYQDS<br>THGK,GAAQNIIPASTGAAK |                                                                                                         |
| IPI00118986.1 | Q9DB20   | LOC100047429 | ATP synthase subunit O, mitochondrial                        |                                                                                                                                                                                     | LGNTQGIISAFSTIMSVHR,LVRPP<br>VQVYGIEGR,YATALYSAASK,VSL<br>AVLNPHYK,GEVPCVTTASPLDD<br>AVLSELK,SFLSPNQILK |
| IPI00850111.1 |          | LOC100047539 | similar to SEC15 homolog                                     | STNLLLTRILSSCLLNLIR,PAPPLPAKM<br>AESCEALGTVPEHER                                                                                                                                    |                                                                                                         |
| IPI00125861.2 | Q811D0-3 | LOC100047603 | Isoform 3 of Disks large homolog 1                           | NAGQAVTIVAQYRPEEYSR,FIEAGQY<br>NNHLYGTSVQSVR                                                                                                                                        |                                                                                                         |
| IPI00187443.1 | P59325   | LOC100047658 | Eukaryotic translation initiation factor 5                   | VNILDFVVK,AMGPLVLTEVLFDEK,LQ<br>DMLDGFVK                                                                                                                                            | FVLCPECENPETDLHVNP,K,AMGPL<br>VLTEVLFDEK                                                                |
| IPI00849728.1 |          | LOC100047762 | similar to Aspartate aminotransferase, cytoplasmic           | SVGAYRTDESQPWWLPVVR,IANDNSL<br>NHEYLPIGLAEFR,IVAATLSDPELKF,<br>NTPYVSSPTWENHNAVFSAAAGFK                                                                                             | FLFPFFDSAYQGFASGDLEK,NLD<br>YVATSIHEAVTK,IVAATLSDPELKF<br>K,IGADFLGR,VGGVQSLGGTGAL<br>R,VGNLTVVGK       |
| IPI00133229.1 | Q9D0W5   | LOC100047806 | Peptidyl-prolyl cis-trans isomerase-like 1                   | VGMVETNSQDRPVDDVK,NFAELAR                                                                                                                                                           |                                                                                                         |
| IPI00110172.1 | P16951   | LOC100047997 | Isoform 1 of Cyclic AMP-dependent transcription factor ATF-2 | IEEPSVETTHQDSPLPHPESTTSDEK<br>,MPLDLSPLATPIIR,KAEDLSSLNGQLQ<br>SEVTLLR                                                                                                              |                                                                                                         |
| IPI00114862.1 | Q99J36   | LOC100048066 | THUMP domain-containing protein 1                            | VDLTNPEYTVVVEIHK,FQSVESGANNV<br>VFIR,ELAGIVGSLNSENK                                                                                                                                 |                                                                                                         |
| IPI00127989.1 | Q9R0Q7   | LOC100048119 | Prostaglandin E synthase 3                                   |                                                                                                                                                                                     | DVNVNFEK,HLNEIDLFHCIDPND<br>SK,KGESGQSWPR,SILCCLR,LN<br>WLSVDFNWK,LTFSCGGSDNF<br>K                      |
| IPI00125901.5 | P62301   | LOC100048340 | 40S ribosomal protein S13                                    | GLSQSALPYR,GLTPSQIGVILRDSHG<br>V AQVR,KGLTPSQIGVILR,GLTPSQIGV<br>I QIGVILR,GLTPSQIGVILR,DSHG<br>V LR,DSHGVAQVR,GLAPDLPEDLYH<br>L I K                                                | GLSQSALPYR,KGLTPSQIGVILR,GL<br>TPSQIGVILR,DSHGVAQVR,GLAPD<br>LPEDLYHLIK                                 |
| IPI00129685.2 |          | LOC100048430 | Translationally-controlled tumor protein                     | EDGVTPFMIFFK,HILANFNYYQFFIGE<br>NMNPDGMVALLDYR,DLISHDELFS<br>D I Y K                                                                                                                | EIADGLCLEVEGK,GKLEEQKPER<br>,DLISHDELFSDIYK                                                             |
|               |          |              |                                                              |                                                                                                                                                                                     | EIADGLCLEVEGK,VKPFMTGAAEQI<br>K,GKLEEQKPER,DLISHDELFSDIYK                                               |



|               |        |              |                                                                 |                                                                                                                                                                                                                                             |                                                                                                                                                                                                                                                                                                                       |
|---------------|--------|--------------|-----------------------------------------------------------------|---------------------------------------------------------------------------------------------------------------------------------------------------------------------------------------------------------------------------------------------|-----------------------------------------------------------------------------------------------------------------------------------------------------------------------------------------------------------------------------------------------------------------------------------------------------------------------|
| IPI00874964.3 |        | LOC100048438 | 36 kDa protein                                                  | VVDLMAYMASK,IVSNASCTTNCLAPL<br>AK,LISWYDNEYGYNSNR,LVINGKPITIF<br>QER,VIHDNFGIVEGLMTTVHAITATQK,<br>PITIFQER,RVIISAPSADAPMFVMGVN<br>HEK,VEIVAINDPFIDLNYMVMFYQYDS<br>THGK,VIISAPSADAPMFVMGVNHEK,<br>GAAQNIIPASTGAAK,WGEAGA EYVVE<br>STGVFTTMEK |                                                                                                                                                                                                                                                                                                                       |
| IPI00849113.1 |        | LOC100048445 | similar to fau                                                  | RFVNVVPTFGK,FVNVVPTFGK,KVHG<br>SLAR,AQELHTLEVTGQETVAQIK                                                                                                                                                                                     | RFVNVVPTFGK,FVNVVPTFGK                                                                                                                                                                                                                                                                                                |
| IPI00112004.1 | Q9D937 | LOC100048454 | MCG17849, isoform CRA_a                                         | AAMEVEAPSK,ANITLSGK,QVVGAVID<br>EGLTTK,APQDVAMEDLEDKS                                                                                                                                                                                       |                                                                                                                                                                                                                                                                                                                       |
| IPI00420807.3 | Q6PDM2 | LOC100048559 | Isoform 1 of Splicing factor,<br>arginine/serine-rich 1         | VVVSGLPPSGSWQDLK,DIEDVIFYK,IY<br>VGNLPPDIR,GGPPFAFVEFEDPR                                                                                                                                                                                   | GGPPFAFVEFEDPR,DGTGVVEF<br>VR VVVSGLPPSGSWQDLK,IYVGNLPP<br>DIR,SHEGETAYIR                                                                                                                                                                                                                                             |
| IPI00850817.1 |        | LOC100048613 | hypothetical protein isoform 1                                  |                                                                                                                                                                                                                                             | SHYEEGPGK,NLPFSVENK                                                                                                                                                                                                                                                                                                   |
| IPI00273232.6 | Q7TNE3 | LOC100048812 | Sperm-associated antigen 7                                      | ELAQKQEEEEAAQQGPAVSPASDYK,<br>EFAPSDEELDSYR                                                                                                                                                                                                 |                                                                                                                                                                                                                                                                                                                       |
| IPI00653423.2 |        | LOC100048832 | Branched-chain-amino-acid<br>aminotransferase                   |                                                                                                                                                                                                                                             | DLIITPATVLK,QSILELAQQWGEFK,<br>EMFGSGTACVVCVSDILYK                                                                                                                                                                                                                                                                    |
| IPI00673707.2 |        | LOC633677    | PREDICTED: similar to Bifunctional<br>aminoacyl-tRNA synthetase | DSKHEELMLGDPCLKDLK,TGQEYKP<br>GNPSAAAVQTVSTK,QYINKDSKHEEL<br>MLGDPCLK                                                                                                                                                                       | SQGSGLSSGGGAGEGQGPK,TIGVM<br>VMVHGDNMGLVLPFR,DQVDSAVQ<br>ELLQLK,LSSCDGLTSAINELNHCLS<br>LR,VAVQGDVVR,LGVENCYFFIFVS<br>QAALEK,VTEAVECLLSLK,LNQWCN<br>VVR,YNVYPTYDFACPIVDSIEGVTH<br>ALR,VAAQGEVVR,AALLNQHYQVN<br>FK,VVQSHR,VASVQVVVPCGITNA<br>LSEEDREALMAKCNEYR,TGQEYKP<br>GNPSAAAVQTVSTK,AIQGATSHHL<br>GQNFSK,VACQGEVVR |
| IPI00673290.1 |        | LOC634088    | similar to Glyceraldehyde-3-phosphate<br>dehydrogenase          | MEGLMTTVHAITATQK,LISWYDNEYG<br>FSNR                                                                                                                                                                                                         |                                                                                                                                                                                                                                                                                                                       |
| IPI00468437.2 | Q9CR47 | LOC636306    | Ribosome biogenesis protein NSA2<br>homolog                     | AHVTHPELK,GTVIEVNVSELGLVTQG<br>GK,TPQGAVPAYLLDR,NPSSPLYTTLG<br>VITK                                                                                                                                                                         | ATFCLPILGVK,TPQGAVPAYLLDR,<br>NPSSPLYTTLGVITK                                                                                                                                                                                                                                                                         |
| IPI00662657.3 |        | LOC640502    | similar to UDP-N-acetylglucosamine<br>pyrophosphorylase 1       | LLFNAGNIANHFFTVPFLK,HALMSLHH<br>CWVLNAGGHFIDENGSRIPAIPR,HHG<br>NKCTIPWYIMTSGRTMESTK                                                                                                                                                         |                                                                                                                                                                                                                                                                                                                       |
| IPI00661702.2 |        | LOC641175    | similar to Cdv3 protein                                         | LQLDNQYAVLENQK,KTPQGPPEIYSD<br>TQFPSLQSTDK                                                                                                                                                                                                  |                                                                                                                                                                                                                                                                                                                       |
| IPI00828573.1 | Q61784 | LOC668715    | L1Md-A13 repetitive sequence                                    | ILTQNIQVIQDTMR,SGTIDASISNR,AW<br>TDVIQTLR,IIGIDENEDFQLK,ISGAEDS<br>IENIDTTVK                                                                                                                                                                |                                                                                                                                                                                                                                                                                                                       |



|               |        |         |                                                                     |                                                                                                                                                                                                                                                                                                                                                                                                                                   |                                                                                                     |
|---------------|--------|---------|---------------------------------------------------------------------|-----------------------------------------------------------------------------------------------------------------------------------------------------------------------------------------------------------------------------------------------------------------------------------------------------------------------------------------------------------------------------------------------------------------------------------|-----------------------------------------------------------------------------------------------------|
| IPI00469307.2 | P55302 | Lrpap1  | Alpha-2-macroglobulin receptor-associated protein                   | DAQMVHSNALNEDTQDELGDPR,KDAQMVHSNALNEDTQDELGDPR,IQEYNVLLDLSR,VSHQGYGSTTEFEPR,AE EGYENLLSPSDMAHIK                                                                                                                                                                                                                                                                                                                                   |                                                                                                     |
| IPI00420706.4 | Q6PB66 | Lrpprc  | Leucine-rich PPR motif-containing protein, mitochondrial            | GICNLLNTYHVPELIK,GFTLNDAANSLLIIR,DATVLSFFHILNGAALR,DVGEPVPFPEPPESFAFYIK,AGYPQYVSEILEK,LIAAYCNVGDIEGASK,EEGFPIRPHYFWPLLGHQK,SYALDKDVASAK,SCGSLLPELSL AER,VPENIYK,SIPDAMNLLFLAT EK,LKAEGQPVGSAK,LLAEILK,MANQFALYKPVTDLFLQLVDSGK,NSLILGFR,DLQEEPAPVRK,DLPI TEAVFSALVTGHAR,LEDTAFQVL LALPLSK,NEANGNLQNLSFLES NTLPFSSSLR,DFAETHIK,EMKE KDVVIK,LDASAILDTAK,TSQVTSS DLESTLEK,PSSNISFPLVTVHLEK ,TLELEIPELR,LQQLGVVYDVSHY NALLK,NVQGIIDILK | LDASAILDTAK,TLLSNCKLKK,TLLEIPELR,PSSNISFPLVTVHLEK                                                   |
| IPI00474873.3 | Q6EDY6 | Lrrc16a | Isoform 1 of Leucine-rich repeat-containing protein 16A             | SERPPTVLMTEELSSPK,ALEEVPIHIE DPPFPSVR,DLLESMVDAETLCPNVM R                                                                                                                                                                                                                                                                                                                                                                         |                                                                                                     |
| IPI00138089.4 | Q505F5 | Lrrc47  | Leucine-rich repeat-containing protein 47                           | NALGPGLSPELGPLPALR,APGPGLAQ GLPQLHSLVLR                                                                                                                                                                                                                                                                                                                                                                                           | NALGPGLSPELGPLPALR,LDAFP PELFRPGALPLLSELAADNCLR                                                     |
| IPI00123281.1 | Q922Q8 | Lrrc59  | Leucine-rich repeat-containing protein 59                           |                                                                                                                                                                                                                                                                                                                                                                                                                                   | NALGPGLSPELGPLPALR,APGPGL AQGLPQLHSLVLR,PGALPLLSELAADNCLR,KTTCNLFLEVTSATSLQLC K,LFTLPLLHYLEVSGCGSLR |
| IPI00654388.2 | Q3UZ39 | Lrrfip1 | Isoform 1 of Leucine-rich repeat flightless-interacting protein 1   | GSGDTSISMDTEASIR,GTGGNQREDE VQAGDTTVEDQVGTVASGPAK,DMLL ELEEQLAESQR                                                                                                                                                                                                                                                                                                                                                                |                                                                                                     |
| IPI00659860.2 |        | Lrrfip2 | Putative uncharacterized protein                                    | FSAEDEALSNIAR,AEQDIATLEQSI SRL EGQVLR                                                                                                                                                                                                                                                                                                                                                                                             |                                                                                                     |
| IPI00225459.1 | Q8BUI3 | Lrwd1   | Isoform 1 of Leucine-rich repeat and WD repeat-containing protein 1 |                                                                                                                                                                                                                                                                                                                                                                                                                                   | VTGLHQQLCTSVNTIYDNAVQGLR ,LQQLPADFGR,LVNLQHLDLLNNR, LSTLPSDFCGLTHLVK,LVTLPVSF AQLK                  |
| IPI00330362.5 | Q3UM18 | Lsg1    | Isoform 1 of Large subunit GTPase 1 homolog                         |                                                                                                                                                                                                                                                                                                                                                                                                                                   | IQSLNLSGLQLLSEHLDPNLLGR,EL DLSNNLLETLPANLGLSHLR,VPGEE FFSVAWTALTVVTQAGHK                            |
| IPI00121579.1 | Q8VC85 | Lsm1    | U6 snRNA-associated Sm-like protein LSm1                            | SIDQFANLVLHQTVER,ESDTPLQQVSI EEILEEQR                                                                                                                                                                                                                                                                                                                                                                                             |                                                                                                     |
| IPI00172202.1 | Q8K2F8 | Lsm14a  | Protein LSM14 homolog A                                             | DEVFEYIIFR,YEGILYITIDTENSTVALAK ,DFDFESANAQFNK                                                                                                                                                                                                                                                                                                                                                                                    |                                                                                                     |

|               |          |        |                                                                        |                                                                                                                                                       |                                                                                                                                                                                                                                                                                                                                |
|---------------|----------|--------|------------------------------------------------------------------------|-------------------------------------------------------------------------------------------------------------------------------------------------------|--------------------------------------------------------------------------------------------------------------------------------------------------------------------------------------------------------------------------------------------------------------------------------------------------------------------------------|
| IPI00229470.2 | Q8CGC4   | Lsm14b | Protein LSM14 homolog B                                                | YEGILYTIIDTDNSTVALAK,SFFDNISSE<br>LK                                                                                                                  |                                                                                                                                                                                                                                                                                                                                |
| IPI00136054.1 | O35901   | Lsm2   | snRNP core protein SMX5 isoform 1                                      |                                                                                                                                                       | YVQLPADEVDTQLLQDAAR,LTDI<br>SVTDPEK                                                                                                                                                                                                                                                                                            |
| IPI00129873.1 | P62313   | Lsm6   | U6 snRNA-associated Sm-like protein<br>LSm6                            |                                                                                                                                                       | YGDAFIR,LNSGVDIR,GNNVLYIS<br>TQK                                                                                                                                                                                                                                                                                               |
| IPI00410804.1 | Q9CYI4   | Luc7I  | Isoform 1 of Putative RNA-binding<br>protein Luc7-like 1               | AEQLGAEGNVDESQK,LAETQEEISAE<br>VSAK,ALLDQLMG TAR,VCEVCSAYLG<br>LHDNDR,SHLLDCCPHDILAGTR                                                                |                                                                                                                                                                                                                                                                                                                                |
| IPI00380309.3 | Q7TNC4   | Luc7I2 | Isoform 1 of Putative RNA-binding<br>protein Luc7-like 2               | LHLGFIEIR,VCEVCSAYLGLHDNDR,LA<br>ETQEEISAEVAAK,VEQLGAEGNVEES<br>QK,VEQLGAEGNVEESQKVMDEVEK                                                             |                                                                                                                                                                                                                                                                                                                                |
| IPI00122418.1 | Q5SUF2-2 | Luc7I3 | Isoform 2 of Cisplatin resistance-<br>associated overexpressed protein | YLQSLLAEVER,LALSQNQQSSGAAGP<br>TGK,YYLCGFPAELFTNTR,IDVLLQKI<br>EELGSEGK                                                                               | KLVEQLK,LALSQNQQSSGAAGPTG<br>K                                                                                                                                                                                                                                                                                                 |
| IPI00322204.4 | Q8R4U7   | Luzp1  | Leucine zipper protein 1                                               | MVDLEKLEEALSR,EKPDSDDDLDIES<br>FVTAK,VIQAEGSDSSTLAEIEVLR,NN<br>DLQDNYLTELNR,EGVDQPVAVVMED<br>SSQHEALR,SLASQLEEIK,TFSDSTHV<br>SVPNDIVGK,SQENILQGFSLPNK |                                                                                                                                                                                                                                                                                                                                |
| IPI00113232.3 | Q08288   | Lyar   | Cell growth-regulating nucleolar protein                               | ELLQQISAFDNVPR,VHSDSVLEQVWD<br>IFSEASSSEQDQQPPSHTAK,LENHQ<br>ENLR,VIAQYHAVMNDHHTSEEELLAIF<br>NR,KPNVSPK,INELIK                                        | NQEAGHEAAGEEAAEASGPPEK<br>K,NQEAGHEAAGEEAAEASGPPE<br>ELLQQISAFDNVPR,LENHQENLR<br>K,LENHQENLR                                                                                                                                                                                                                                   |
| IPI00130018.1 | P97823   | Lypla1 | Isoform 1 of Acyl-protein thioesterase 1                               |                                                                                                                                                       | ALINPANVTFK,DISVLQCHGDCDPL<br>VPLMFGSLTVER,LAGVTALSCWLP<br>LR                                                                                                                                                                                                                                                                  |
| IPI00173156.1 | Q8K3C3   | Lzic   | Protein LZIC                                                           | VLALAGFDVEK,ETLEQLSEFNDSLK,E<br>TLEQLSEFNDSLKK                                                                                                        |                                                                                                                                                                                                                                                                                                                                |
| IPI00848566.1 |          | Macf1  | microtubule-actin crosslinking factor 1                                |                                                                                                                                                       | AFSIDIIR,LFGEDVEVLNWLAEV<br>EDK,LVLDTVNEVSHALLELVPWR<br>,ALEEEIENHATDVHQAVK,RGEE<br>LIGR,FVTISGQK,ALALDEAVSQS<br>AQITEFHDK,FLDVLELAEK,LISDT<br>VGQR,QLEESASHLACFQAAESQ<br>LRPWLMEK,LELLLQIANK,NTQGT<br>TTSSHTSASADIEK,YYQLEELAF<br>R,ELMMGVLGPLSIDPNMLNAQK,<br>NDVLAHQATVATVNK,SLRPAVE<br>R,AILEQQVLAEEELTTK,YTALVTLT<br>TQHVK |
| IPI00132692.1 | Q9CQL1   | Magohb | Protein mago nashi homolog 1-related                                   |                                                                                                                                                       | FGHEFLEFEFRPDGK,IGSLIDVN<br>QSK,VFYLLVQDLK                                                                                                                                                                                                                                                                                     |

|               |          |           |                                                                        |                                                                                                                                               |                                                                                                                                  |                                                                                                                                                                                                           |
|---------------|----------|-----------|------------------------------------------------------------------------|-----------------------------------------------------------------------------------------------------------------------------------------------|----------------------------------------------------------------------------------------------------------------------------------|-----------------------------------------------------------------------------------------------------------------------------------------------------------------------------------------------------------|
| IPI00606905.1 | Q571K4   | Map3k7ip3 | Mitogen-activated protein kinase kinase kinase 7-interacting protein 3 | SAAPEIQIPISVIPGSGGGEK,PGSHSVA<br>YLPYTASSLPK,ATTENLLNLVDQEER,<br>SSSSGSDDYAYTQALLLHQR                                                         |                                                                                                                                  |                                                                                                                                                                                                           |
| IPI00130014.3 |          | Map4k4    | mitogen-activated protein kinase kinase kinase 4                       |                                                                                                                                               | RPHAQQQPPPPQQQDR,EGTLIVR                                                                                                         |                                                                                                                                                                                                           |
| IPI00119663.3 | P63085   | Mapk1     | Mitogen-activated protein kinase 1                                     |                                                                                                                                               | NYLLSLPHK, YIHANVLHR, IEVEQA<br>LAHPYLEQYYDPSDEPIAEAPFK                                                                          |                                                                                                                                                                                                           |
| IPI00117896.3 | Q61166   | Mapre1    | Microtubule-associated protein RP/EB family member 1                   | QGQETAVAPSLVAPALSKPK,KNPGV<br>GNGDDEAAELMQQVK,QQQETAVAP<br>SLVAPALSK                                                                          | NIELICQENEGENDPVLQR,KPLGSS<br>TAAPQRPIATQR                                                                                       |                                                                                                                                                                                                           |
| IPI00229534.5 | P26645   | Marcks    | Myristoylated alanine-rich C-kinase substrate                          | EAAEAEPAEPSSPAEAEAGASASSTS<br>SPK,DEAAAAATEPGAGAADKEAAEAE<br>PAEPSSPAEAEAGASASSTSSPK,EEL<br>QANGSAPAADKEEPASGSAATPAAAE<br>K                   | ESGEGAEAEAGATAEGAK,GEATA<br>ERPGEAAVASSPSK                                                                                       | LSGFSEFKK,GEATAERPGEAAVASS<br>PSK                                                                                                                                                                         |
| IPI00281011.7 | P28667   | Marcks1   | MARCKS-related protein                                                 | GEGESPPVNGTDEAAGATGDAIEPAP<br>PSQEAERAK,GEGESPPVNGTDEAAGA<br>TGDAIEPAPPSQEAERAKGEVAPK,EGD<br>TEEEAGPQAAEPSTPSGPESGTPAS<br>AEQNE               |                                                                                                                                  | AAATPESQEPQAK,GDVTAEAAAGA<br>SPAK                                                                                                                                                                         |
| IPI00461469.3 | Q68FL6   | Mars      | Methionyl-tRNA synthetase, cytoplasmic                                 |                                                                                                                                               | NSELLNNLGNFINR,ADKNQVAA<br>EVAK,ILATSFICTLPAGHR,LFVSE<br>GSPGSLPVLAAAAAR                                                         | VLTHIDHLSLR,DNVPFHGLVFPSCV<br>LGAEDNYTLVK,KGEDILGPLR,ILAT<br>SFICTLPAGHR,PAAVEAVTAAGSQ<br>HIQTLTDEVTK,YHAIHADIYR,NQVA<br>AEVAK,LFVSEGSPGSLPVLAAAAAR                                                       |
| IPI00454016.5 | Q3THS6   | Mat2a     | S-adenosylmethionine synthetase isoform type-2                         | TQVTVQYMQDR,IIVDTYGGWGAHGG<br>GAFSGK,FVIGGPQGDAGLTGR,TGMI<br>LLAGEITSR,YLDEDTIYHLQPSGR,VIK<br>AVVPAKYLDEDTIYHLQPSGR                           | ICDQISDAVLDAHLQQDPDAK,FVI<br>GGPQGDAGLTGR,HIGYDDSSK,<br>VACETVAK,TCNVLVALEQQSPDI<br>AQQVHLDLDR,TGMILLAGEITSR,YL<br>DEDTIYHLQPSGR | ICDQISDAVLDAHLQQDPDAK,KPIY<br>QR,FVIGGPQGDAGLTGR,NFDLRP<br>GVIVR,VACETVAK,HIGYDDSSK,TC<br>NVLVALEQQSPDIAQQVHLDLDR,TAA<br>YGHFGR,YLDEDTIYHLQPSGR                                                           |
| IPI00468802.5 | Q99LB6   | Mat2b     | Isoform 1 of Methionine adenosyltransferase 2 subunit beta             | RPDVVESQPDAASQLNVGASGNLAK,<br>VLITGATGLLGR,IPVLYGEVEKLEESA<br>VTVMFDK                                                                         |                                                                                                                                  |                                                                                                                                                                                                           |
| IPI00459789.2 | Q99LB6-3 | Mat2b     | 25 kDa protein                                                         | VLITGATGLLGR                                                                                                                                  |                                                                                                                                  | VLITGATGLLGR,EVLGCCLGTGWG<br>LGGGNISALMLRK                                                                                                                                                                |
| IPI00453826.2 | Q8K310   | Matr3     | Matrin-3                                                               | DTSENADGQNDENKEDYTIPEYR,G<br>DTDQASNILASFGLSAR,IEELDQENEA<br>ALENGIK,YQKLLK,ITPENLPQILLQLK,<br>VIHLSNLPHSGYSDSAVLK,YQLLQQLVE<br>PFGVISNHLILNK | GPSLNPVLDYDHGSR,GDTDQAS<br>NILASFGLSAR,ITPENLPQILLQLK<br>,IGPYQPNVPVGIDYVIPK,YQLLQQL<br>VEPFGVISNHLILNK,VIHLSNLPH<br>SGYSDSAVLK  | GPSLNPVLDYDHGSR,GPLPLSSQH<br>R,DLAAGIGLLAAATQSLSMASLG<br>R,NTHCSSLPHYQK,GDTDQASNILA<br>SFGLSAR,GAPPSSNIEDFHGLLPK,I<br>TPENLPQILLQLK,IGPYQPNVPVGID<br>YVIPK,VIHLSNLPHSGYSDSAVLK,Y<br>QLLQQLVEPFGVISNHLILNK |

|               |        |             |                                                                |                                                                                                                                                                                                       |                                                                                                                                                                                                                    |                                                                                                                                                                         |
|---------------|--------|-------------|----------------------------------------------------------------|-------------------------------------------------------------------------------------------------------------------------------------------------------------------------------------------------------|--------------------------------------------------------------------------------------------------------------------------------------------------------------------------------------------------------------------|-------------------------------------------------------------------------------------------------------------------------------------------------------------------------|
| IPI00131067.1 | Q9Z2D8 | Mbd3        | Isoform 1 of Methyl-CpG-binding domain protein 3               | YLGGSM DLSTDFDR,LSGLSAFDIAEELVR                                                                                                                                                                       | KQEELVQQVR,GLQGVGPGCTDETLLSAIASALHTSTLPITGQLSAAVEK,LSGLSAFDIAEELVR                                                                                                                                                 | KQEELVQQVR,GLQGVGPGCTDETLLSAIASALHTSTLPITGQLSAAVEK                                                                                                                      |
| IPI00124157.3 | Q9WTZ2 | Mbtps1      | Membrane-bound transcription factor site-1 protease            |                                                                                                                                                                                                       |                                                                                                                                                                                                                    | AGLLTLEDHPNIK,QALIASAR,RPQLAQQAHPAR                                                                                                                                     |
| IPI00170316.1 | Q8K5B2 | Mcf2        | Multiple coagulation factor deficiency protein 2 homolog       | NNDGYIDYAEFAK,DDDKNNDGYIDYAEFAK                                                                                                                                                                       |                                                                                                                                                                                                                    |                                                                                                                                                                         |
| IPI00115902.2 | O55142 | mCG_1036414 | 60S ribosomal protein L35a                                     | IEGVYAR,VMLYPSR,NNTVTPGGKPK,DETEFYLGK                                                                                                                                                                 |                                                                                                                                                                                                                    | CAYVYK,IEGVYAR,AIFAGYK                                                                                                                                                  |
| IPI00222546.5 | P67984 | mCG_130059  | 60S ribosomal protein L22                                      | ITVTSEVPFSK,IKVNGKAGNLGGVVTIER                                                                                                                                                                        | FTLDCTHPVEDGIMDAANFEQFLQER,YFQINQDEEEEEDED,ITVTS EVPFSK,AGNLGGGVVTIER                                                                                                                                              | FTLDCTHPVEDGIMDAANFEQFLQER,ITVTSEVPFSK,AGNLGGGVVTIER                                                                                                                    |
| IPI00323820.4 | Q3UJN1 | Mcm2        | Putative uncharacterized protein                               | ISHLPLVEELR,IFASIAPSIYGHEDIK,AIFTTGQGASAVGLTAYVQR,DNNDLLF ILK,FGAQDQTIEPEK,ESLVVNYEDLAAR,DYVMEDDVNMAIR,DTVDPVQDE MLAR,VMMESFIDTQK,GLALALFGGEPK,FGAQDQTIEPEKDLMDK                                      | TSHIAMEQQSISISK,FVVGSHVRA,AGIVTSLQAR,FDVLCVVR,ITNHIHVR,VAVGELTDEDVK,RADALTS SPGR,DNNDLLLFILK,THVDSHGNVFK,ESLVVNYEDLAAR,EWTL EAGALVLADR,GLALALFGGEPK                                                                | ISHLPLVEELR,ITNHIHVR,FVVGSHVR,IFASIAPSIYGHEDIK,AGIVTSLQAR,THVDSHGHNVFK,KDLMDK                                                                                           |
| IPI00108338.1 | P25206 | Mcm3        | DNA replication licensing factor MCM3                          | AALLEVFQEAHEQSVGMLHLTESINR,DFVASIDATYAK,IKPTLTQESAAYIAE EYSR,TPMENIGLQDSSLR,DIQPAFS ADDIAK,SVDVILDDDLVDK,LIVSVNDR,GDINILLIGDPSVAK                                                                     | TVLIACNVK,AALLEVFQEAHEQS VGMLHLTESINR,TPMENIGLQDSSLR,GVVCIDEFDK,APAGQLPR, TVDLQDAEEAVELVQYAYFK,IQV VGTYR,TAIHEVMEQGR,RLEAGA MVLADRGVVCIDEFDK,AIICLLLG GVER,LLNNAFEELVAFQR,SVDVI LDDDLVDK,LIVSVNDR,GDINILLI GDPSVAK | CSVLAAANPVYGR,IQVVGTYR,IKPTLTQESAAYIAEYSR,SLAPSIHGH DYVK,LLNNAFEELVAFQR,TLTSCF LSCVVCVEGIVTK,GVVCIDEFDK,APAGQLPR                                                        |
| IPI00117016.1 | P49717 | Mcm4        | DNA replication licensing factor MCM4                          | KGLQVDLQSDGAAAEDIVPSEQSLGQK,GILLQLFGGTR,TSVLAAANPIESQW NPK,NLNPEDIDQLITISGMVIR,FDLIFLMLDPQDEAYDRR,SVLHEVMEQQTLSIAK,LSEESQALIEAYVNMR                                                                   | LVIWGTDVNVATCK,VNVTGIYR,GILLQLFGGTR,TSVLAAANPIESQW NPK,NLNPEDIDQLITISGMVIR,T GIVDSILTGTMSATSR,VEAIDVEE AKR,THIDVIHYR,SVLHEVMEQQT LSIK,RLHGLDEEAQK                                                                  | LASALAPSIYEHEDIK,TSVLAAANPIESQW NPK,AGIICQLNAR,FLQCFTD PLAK,KPDIYER,SQLLQYVYNLVP R                                                                                      |
| IPI00309398.6 | Q52KC3 | Mcm5        | minichromosome maintenance deficient 5, cell division cycle 46 | VTIMGIYSIK,FAIGSQVSEHSIVQDFTK,LQELPDAVPHGEMPR,LAALPNIYELIS K,PAGDELLQDIQVMLK,GEDNIDFMPTILSR,LQPFATEADVEEALR,FDMIFIVK,WDETKGEDNIDFMPTILSR,IPGIIISAS AVR,QPAEHLQLLEAAK,VAIHEAMEQQTISIAK,SFAGSVSPQEEEEFR | VTIMGIYSIK,FAIGSQVSEHSIVQDFTK,VLGIQVDTDGSGR,LSAEAA EK,LAALPNIYELISK,PAGDELLQDIQVMLK,AGITTTLSNR,GSSAAGL TASVIR,GVVCIDEFDK,AIACLLFG GSR,LQPFATEADVEEALR,FDMIFIVK,IPGIIISASAVR,VAIHEAMEQQTISIAK                       | FAIGSQVSEHSIVQDFTK,CSVLAAANPVYGR,LAALPNIYELISK,PAGDELLQDIQVMLK,GSSAAGL TASVIR,GVVCIDEFDK,HMQLYCDR,RGEIQHR,AIACLLFGGSR,LQPFATEADVEEALR,IPGIIISASAVR,RSSIPITVR,SDAS PSSIR |

|                |        |      |                                       |                                                                                   |                                                                                                                                                                                                                                                                                                                 |                                                                                                                                                                                      |
|----------------|--------|------|---------------------------------------|-----------------------------------------------------------------------------------|-----------------------------------------------------------------------------------------------------------------------------------------------------------------------------------------------------------------------------------------------------------------------------------------------------------------|--------------------------------------------------------------------------------------------------------------------------------------------------------------------------------------|
| IPI00123881.1  | P97311 | Mcm6 | DNA replication licensing factor MCM6 | DFYVAFQDLPTR,YLQFAEELIRPER,D<br>QVAIHEAMEQQTISITK                                 | YTQPNICR,GVLLMLFGGVPK,YL<br>QFAEELIRPER,DQVAIHEAMEQQ<br>TISITK,LFLDFLEEFQSDGEIK,A<br>SSAAGLTAAVVR,ELRDEEQTAES<br>IK,IQETQAE LPR,LTHYDHVLIET<br>QAGLK,LVFLACHVAPTNP,DFY<br>VAFQDLPTR,EIESEIDSEEELINK<br>K,AEAVESAQAGDR,ISNLIVLHLR                                                                                | TSILAAANPVSGHYDR,NLYHNLCTS<br>LFPTIHGNDEVK,RIVDLHSR,AEAVE<br>SAQAGDR,HVDEFSR,ASSAAGLT<br>AAVVR                                                                                       |
| IPI00126396.2  | Q3V122 | Mcm7 | Putative uncharacterized protein      | FLQEFYENELGK,SLEQNVQLPAALL<br>SR,QPTVPESLADYITAAYVEMR,TGFQ<br>QMAQGLLSETYLEAHWIVK | TLLAILR,SITVVLEGENTR,SVHFS<br>EAEQR,IQEHSDQVPVGNIPR,LA<br>QHITYVHQHSR,DSVSGELTLEG<br>GALVLDQGVCCIDEFDK,EQVAL<br>YVDLDDIAEDDPELVDSICENAK,<br>DVLDVYIEHR,AGILTTLNAR,SQLL<br>SYIDR,MVDIVEKEDVNEAIR,LFG<br>DVVQELLPEYK,TAIHEVMEQQT<br>SIAK,FDLLWLIQDRPDR,LAASIAP<br>EYGHEDVKK,GSSGVGLTAAVLR<br>,IAQPGDHVSVTGIFLPVLR | SQLLSYIDR,LFGDVQELLPEYK,SL<br>EQNVQLPAALLSR,YGTQLVHLAHR,<br>IQEHSDQVPVGNIPR,LAASIAP<br>HEDVK,AGILTTLNAR,GSSGVGLT<br>AVLR,IAQPGDHVSVTGIFLPVLR                                         |
| IPI00753701.3  |        | Mdc1 | mediator of DNA damage checkpoint 1   |                                                                                   |                                                                                                                                                                                                                                                                                                                 | AVLALGGSLASSVNEASHLVTDR,L<br>GLPLLSPEFLLTGVK,SPDCSVALP<br>FPSISK,PTALVTQGR                                                                                                           |
| IPI00336324.11 | P14152 | Mdh1 | Malate dehydrogenase, cytoplasmic     |                                                                                   | VIVVGNPANTNCLTASK,GEFITTV<br>QQR,AIADHIR,EVGVEALKDSDS<br>WLK,DLDVAVLVGSMMPR,LGVTAD<br>DVK,FVEGLPINDFSR,KLSSAMSA<br>AK                                                                                                                                                                                           | VIVVGNPANTNCLTASK,GEFITTVQ<br>QR,AIADHIR,VLVTGAAGQIAYSLLY<br>SIGNSVFGK,FVEGLPINDFSR                                                                                                  |
| IPI00323592.2  | P08249 | Mdh2 | Malate dehydrogenase, mitochondrial   |                                                                                   | LTLYDIAHTPGVAADLSHIETR,GY<br>LGPEQLPDCLK,VAVLGASGGIGQ<br>PLSLLLK,IFGVTTLDIVR,VNVPVI<br>GGHAGK,GCDVVIPAGVPR,VDF<br>PQDQLATLTGR,ANTFVAELK,EG<br>VVECSFVQSK,IQEAGTEVVK,HG<br>VYNPNK                                                                                                                                | LTLYDIAHTPGVAADLSHIETR,GYL<br>GPEQLPDCLK,ETECTYFSTPLLLGK<br>,VAVLGASGGIGQPLSLLLK,IFGVTT<br>LDIVR,KGEDFVK,VNVPVIGGHAGK,<br>GCDVVIPAGVPR,VDFPQDQLATL<br>TGR,EGVVECSFVQSK,IQEAGTEV<br>K |

|               |          |         |                                                                        |                                                                                                                                     |                                                                                                                                                                                                                                                                                                                                                                                                                                                                                                                                                                                                                                         |
|---------------|----------|---------|------------------------------------------------------------------------|-------------------------------------------------------------------------------------------------------------------------------------|-----------------------------------------------------------------------------------------------------------------------------------------------------------------------------------------------------------------------------------------------------------------------------------------------------------------------------------------------------------------------------------------------------------------------------------------------------------------------------------------------------------------------------------------------------------------------------------------------------------------------------------------|
| IPI00458039.3 | A2ANY6   | Mdn1    | Midasin homolog                                                        |                                                                                                                                     | ESPLPHLVESLDQFTGGVISSVSE<br>LQSLK,FVELHFDELPSSELETILH<br>K,RVVLEGR,LICQHIIISGNVK,ANIL<br>EDVNLDELK,LEAVLLLMQR,LVEE<br>YALYPDTVAPLLASILQLQHGM,<br>TGGQVNHDLHER,KQEEADVIQE<br>VLEK,ELLITETQEVVR,NTVQGIV<br>NFYTALR,LNSVLEVEK,LLEDDF<br>WASVSTLHVQK,NLLSHLQTGR,T<br>SLVAALAK,ETFEELFVQTFSK,IIS<br>SVSELLER,SFVLVESVCK,GVTIEI<br>VNK,SLLQAWGLILR,TFIYLDR,IL<br>GSVQWR,LNKPILLEGSPGVGK,G<br>SPASSVSTLSHTAILIVQYLQR,LL<br>EEAQLQDLEK,LTAALATPVK,LIQ<br>VEGYWISVGDKEPK,LVQDLLESH<br>TASLQAR,LKPEIVINELDVQVGR<br>,TSLVEHLAAVTGR,YLLGLTELLP<br>AHQR,SAQVLQNLK,EDSFFLLD<br>EISLADDSVLER,IFTEANLVSVGS<br>K,SALSIVSSTR,LLQALHTDGP,K,<br>TELYVEELESK |
| IPI00115977.1 | Q99KE1   | Me2     | NAD-dependent malic enzyme,<br>mitochondrial                           |                                                                                                                                     | ALTTQLTDAELAQGR,LKPSVIIGV<br>AGAGPLFTHGVK                                                                                                                                                                                                                                                                                                                                                                                                                                                                                                                                                                                               |
| IPI00110388.2 | Q2VPQ9-2 | Meaf6   | Isoform 2 of Chromatin modification-<br>related protein MEAF6          | KQELAETLANLER,SSVTSAAAVSALA<br>GVQDQLIEK,SSVTSAAAVSALAGVQD<br>QLIEKR,QELAETLANLER                                                   |                                                                                                                                                                                                                                                                                                                                                                                                                                                                                                                                                                                                                                         |
| IPI00224399.1 | Q8C1S0   | Med19   | Mediator of RNA polymerase II<br>transcription subunit 19              | LSNFLPDLPGMIDLPGSHDNSSLR,SLI<br>EKPPILGGSFNPITGTMLSGFR                                                                              |                                                                                                                                                                                                                                                                                                                                                                                                                                                                                                                                                                                                                                         |
| IPI00405351.1 | Q8C611   | Mesdc2  | unnamed protein product                                                | TLMMFVTVSGNPTEK,LLEQWEKDDDI<br>EEGDLPEHK,RPSAPIDFSK,ETEEITSL<br>WQGSLFNANYDVQR                                                      |                                                                                                                                                                                                                                                                                                                                                                                                                                                                                                                                                                                                                                         |
| IPI00272622.1 | Q8BP48   | Metap1  | Methionine aminopeptidase 1                                            |                                                                                                                                     | LQCPTCIK,LFHTAPNVPHYAK                                                                                                                                                                                                                                                                                                                                                                                                                                                                                                                                                                                                                  |
| IPI00272238.5 | Q3UI33   | Metap2  | Methionine aminopeptidase                                              | GAVSAVQQELDKESGALVDEVAK,PG<br>MTMIEICEKLEDCSR,ALDQASEEIIWN<br>DFR                                                                   |                                                                                                                                                                                                                                                                                                                                                                                                                                                                                                                                                                                                                                         |
| IPI00228590.2 | Q9CQU1   | Mfap1b  | Microfibrillar-associated protein 1                                    | GAFFMDEDEEVYK,YTHLVDQDTSFD<br>SAWGQESAQNTK                                                                                          |                                                                                                                                                                                                                                                                                                                                                                                                                                                                                                                                                                                                                                         |
| IPI00124959.1 | Q61769   | Mki67   | Ki-67 protein                                                          | NQTPVEAGDVGSPADTPEHSSSPQR,<br>VQPLEDHSVFQELFQTSR,LESVEEQV<br>STVMKTEEMEA                                                            | SQSPEDLSGVQEVFQTSQGHNK,KSL<br>GTHSPAVLK,FDASAENVGIIK,LDS<br>TAGMPNSKR                                                                                                                                                                                                                                                                                                                                                                                                                                                                                                                                                                   |
| IPI00225912.8 | Q91VE6   | Mki67ip | Isoform 1 of MKI67 FHA domain-<br>interacting nucleolar phosphoprotein | GIDYSFPSLVLPKPK,GYAFVEFESEDV<br>AK,SQVMEVGGDKDDEIILK,PSLALNP<br>QEDSQFEK,NALFHRPSFPAVK,NIAVA<br>HR,GIDYSFPSLVLPK,IVAETMDNYLF<br>GER | NALFHR,GHLQMLK,NIAVAHR,GIDY<br>SFPSLVLPK                                                                                                                                                                                                                                                                                                                                                                                                                                                                                                                                                                                                |



|               |        |           |                                                       |                                                                                                                                                       |                                                                                                                                                                                  |
|---------------|--------|-----------|-------------------------------------------------------|-------------------------------------------------------------------------------------------------------------------------------------------------------|----------------------------------------------------------------------------------------------------------------------------------------------------------------------------------|
| IPI00885322.1 |        | Mlt4      | 207 kDa protein                                       | LSPTYVLYMACR,EELSSGDSLSPDP<br>WK,TPAAVLPTPVAVSQPIR,TQVLSPD<br>SLFTAK,SQDADLPGSSGAPENLTFK,L<br>LEPEEPGLSRPPLPR,QKDEDDDEEE<br>DDDVDTMLIMQR              |                                                                                                                                                                                  |
| IPI00314370.3 | P51949 | Mnat1     | CDK-activating kinase assembly factor<br>MAT1         | LFIQKEEELQQALK,QAFLDELESSDLP<br>VALLLAQHK,EQEELEEALVER,QAFL<br>DELESSDLPVALLLAQHKDR                                                                   |                                                                                                                                                                                  |
| IPI00132323.6 | Q8K396 | Mnd1      | Meiotic nuclear division protein 1<br>homolog         | IGTSNYYWAFPSK,MMEIFFETK                                                                                                                               |                                                                                                                                                                                  |
| IPI00830528.1 | Q3UD86 | Mov10     | Putative uncharacterized protein                      | FLAAVAHSPLAAQLKPTTPFK,LLTLEV<br>PGVAESR,GDHLFALLSSETQQDDPVT<br>YK,WEGLPQQGFPIIFHGVMGK,QLLPT<br>LLQGPSIFTAPK,VLITTLITASR,TIYNH<br>DFKPSYGTAPGFSSMLYGMK | GTTRPAPYIIFGPPGTGK,ALLIVV<br>GNPLLLGHDPDWK,RHQNLQPER<br>DVEVQGPHEAR,RHQNLQPER,QLL<br>,VLITTLITASR,LDLQQGQDLLQGL<br>SK,SVILISTVR<br>PTLLQGPSIFTAPK,LDLQQGQDLLQ<br>GLSK,WADVQLPEKR |
| IPI00402911.1 | Q810V0 | Mphosph10 | U3 small nucleolar ribonucleoprotein<br>protein MPP10 |                                                                                                                                                       | MQIKPPGKPR,DQAWDDVERK,LDA<br>LSNFHFIPKPPVPEIK                                                                                                                                    |
| IPI00761693.5 | Q8BVD5 | Mpp7      | Isoform 1 of MAGUK p55 subfamily<br>member 7          | QNPLPILHGAAALADDLTELQNK,KS<br>EQYDTADVPTYEEVTPYR,IIINDDLTVA<br>FNELK                                                                                  |                                                                                                                                                                                  |
| IPI00406030.2 | Q5SWZ5 | Mprip     | Myosin phosphatase Rho interacting<br>protein         | LLAEETAATISAIEAMK                                                                                                                                     |                                                                                                                                                                                  |
| IPI00132703.1 | Q9CQL7 | Mrfap1    | MORF4 family-associated protein 1                     | LWEMDNMLIQIK,TQVEASEESALNHL<br>QGAGGAEPR,MAEMLVQLVR                                                                                                   |                                                                                                                                                                                  |
| IPI00885509.1 | Q9CQT1 | Mri1      | Methylthioribose-1-phosphate isomerase                |                                                                                                                                                       | VTVLTHCNTGALATAGYGTALGVIR,<br>EGATEETVR,HLEEQTNPR                                                                                                                                |
| IPI00118237.2 | Q99N96 | Mrpl1     | 39S ribosomal protein L1, mitochondrial               | SYTYMESDPEDDVYLK,TVEPFASVIAL<br>PHLFSSEVNK,TTEAETEETQTAEAA                                                                                            |                                                                                                                                                                                  |
| IPI00132412.3 | Q3TBW2 | Mrpl10    | 39S ribosomal protein L10, mitochondrial              |                                                                                                                                                       | LMAITEYIPPK,SVPFLPLLGGCVDD<br>TILSR,LPSLDQLQGGQLVGGLTHLMA<br>QTR                                                                                                                 |
| IPI00118963.1 | Q9DB15 | Mrpl12    | 39S ribosomal protein L12, mitochondrial              |                                                                                                                                                       | LVESLPQEIK,NYVQGINLVQAK,SEA<br>LAGAPLDNAPK                                                                                                                                       |
| IPI00134011.1 | Q9D1P0 | Mrpl13    | 39S ribosomal protein L13, mitochondrial              |                                                                                                                                                       | HIAFSGNK,LAVIASNK,NLVEELPQP<br>R                                                                                                                                                 |
| IPI00118226.1 | Q99N91 | Mrpl34    | 39S ribosomal protein L34, mitochondrial              |                                                                                                                                                       | LSTPAGVQVILR,GNEYQPSNIK                                                                                                                                                          |
| IPI00323669.3 | Q9Z2Q5 | Mrpl40    | 39S ribosomal protein L40, mitochondrial              | SMLEAQQEALEELKLESAELYAEAIK,A<br>SQELIPIEDFITPVR                                                                                                       |                                                                                                                                                                                  |
| IPI00153603.1 | Q8R2L5 | Mrps18c   | 28S ribosomal protein S18c,<br>mitochondrial          |                                                                                                                                                       | HITGLCGK,KCVLCEK                                                                                                                                                                 |
| IPI00754363.1 | Q99LZ4 | Mrps23    | Mrps23 protein (Fragment)                             | AFDLFNPNFK,YTELQNLGETDEEKLF<br>VETGK                                                                                                                  |                                                                                                                                                                                  |
| IPI00108194.1 | Q80ZS3 | Mrps26    | 28S ribosomal protein S26,<br>mitochondrial           |                                                                                                                                                       | LQLEAQAQEVQK,LEFTLEVR                                                                                                                                                            |

|               |        |        |                                                    |                                                                                                                                                                                                                                                                                                                                                                                                                                                    |                                                                                                                                                                                         |
|---------------|--------|--------|----------------------------------------------------|----------------------------------------------------------------------------------------------------------------------------------------------------------------------------------------------------------------------------------------------------------------------------------------------------------------------------------------------------------------------------------------------------------------------------------------------------|-----------------------------------------------------------------------------------------------------------------------------------------------------------------------------------------|
| IPI00110672.3 | Q9CY16 | Mrps28 | 28S ribosomal protein S28, mitochondrial           | FLGGTTDTTILEADAVLLGLQEIR,IFHIV<br>EDDLYIDFGGK                                                                                                                                                                                                                                                                                                                                                                                                      |                                                                                                                                                                                         |
| IPI00124828.1 | Q61733 | Mrps31 | 28S ribosomal protein S31, mitochondrial           | KPSASLEATVDR,KVDQSVANEISQK<br>AAESQGR,IEFAK,NEFLSPELVAAASA<br>VADSLPFDK                                                                                                                                                                                                                                                                                                                                                                            |                                                                                                                                                                                         |
| IPI00222538.2 | Q8BJZ4 | Mrps35 | 28S ribosomal protein S35, mitochondrial           | IPNFLHLTPVAIK,SSENSVLQTLQM<br>R                                                                                                                                                                                                                                                                                                                                                                                                                    |                                                                                                                                                                                         |
| IPI00118196.1 | Q99N87 | Mrps5  | 28S ribosomal protein S5, mitochondrial            | SGFLWPGLNVPLIK,VLVAVGNGNGAA<br>GFAIGK                                                                                                                                                                                                                                                                                                                                                                                                              |                                                                                                                                                                                         |
| IPI00118158.1 | P43247 | Msh2   | DNA mismatch repair protein Msh2                   | LNLVEAFVEDSELR,ALNLFQGSV<br>EDTTGSQSLAALLNK,ETLQLEGA<br>AEAGFVR,NKGEYEEAQDAIVK,G<br>TSTYDGFGLAWAISDYIATK,IILEF<br>LSK,TLQSVVLSK,LYQGINQLPSVI<br>QALEK,LGLCEFPENDQFSNLEAL<br>LIQIGPK,GVCDQSFGIHVAELANF<br>PR,KMQSTLINAAR,GGILITER,DS<br>LIIIDELGR,GDFYTAHGEDALLAA<br>R,VGAGDSQLK,KLGLCEFPENDQ<br>FSNLEALLIQIGPK,FTNSELSSLN<br>EETYK                                                                                                                 | HVGVGYVDSTQR,ALNLFQGSVED<br>TTGSQSLAALLNK,FFEGMPEKPKST<br>TVR,VGAGDSQLK,LGLCEFPENDQ<br>FSNLEALLIQIGPK,LYQGINQLPSVI<br>QALEK                                                             |
| IPI00310173.2 | Q6GTK8 | Msh6   | mutS homolog 6                                     | TFFGDDFIPNDILIGCEEEAEEHG<br>K,LDAVEDLMAVPDKVTEVADLLK<br>,SIVYWGIGR,LANLINAER,SONF<br>DLVIFYK,LANLPEEVIQK,GNWAH<br>SGFPEIAFGR,VHVQFFDDSPTR,<br>GTATFDGTAIANAVVK,RATPILSE<br>TK,GRFPDLTAEALQR,YQLEIPENF<br>ATR,HATAHSLVLVDELGR,VYGV<br>CFVDTSLGK,KTGLITPK,TLVAHY<br>PPVQILFEK,IHNVGSPLK,FFIGQF<br>SDDR,AIMYEETTSK,AGFDSY<br>DQALADIR,KLPDLER,AGFDSY<br>DQALADIRENEQSLLEYLDK,IIDF<br>LSALEGFK,GMTSES SVGLTPG<br>ESELALSALGGIVFYLK,VSGLLE<br>EVAGGFTSK | TLVAHYPPVQILFEK,YQLEIPENFAT<br>R,GSLSSCLQEGLIPGSQFWDATK,I<br>HNVGSPLK,GGHFYSSK,VYGVCFV<br>DTSLGK,AGFDSYDQALADIR,FPD<br>LTAEALQR,KWWQLK,IIDFLSALEGF<br>K,LANLPEEVIQK,VSGLLEEVAGGF<br>TSK |
| IPI00120924.1 | Q920Q6 | Msi2   | Isoform 1 of RNA-binding protein Musashi homolog 2 | GFGFVTFENEDVVEK,IFVGGLSANTV<br>VEDVK                                                                                                                                                                                                                                                                                                                                                                                                               |                                                                                                                                                                                         |
| IPI00110588.4 | P26041 | Msn    | Moesin                                             | TQEQLASEMAELTAR,FYPEDVSEELI<br>QDITQR,APDFVIFYAPR,IGFPWSEIR,T<br>AMSTPHVAEPAENEHDEQDENGAEA<br>SAELR,TAMSTPHVAEPAENEHDEQD<br>ENGAEASAE LRADAMAK                                                                                                                                                                                                                                                                                                     | IQVWHEEHR,FYPEDVSEELIQDITQ<br>QR,LFFLQVK,KAQQELEEQR,AP<br>DFVIFYAPR,IGFPWSEIR,FVIKPID<br>K,RKPDITIEVQQMK                                                                                |

|               |        |         |                                                 |                                                                                                                                                                                                                                                                              |                                                                                                                                                                                                                                                                                                                                     |
|---------------|--------|---------|-------------------------------------------------|------------------------------------------------------------------------------------------------------------------------------------------------------------------------------------------------------------------------------------------------------------------------------|-------------------------------------------------------------------------------------------------------------------------------------------------------------------------------------------------------------------------------------------------------------------------------------------------------------------------------------|
| IPI00853911.1 | Q8K4B0 | Mta1    | Metastasis-associated protein MTA1              | QVYIPNYNKPNNQISASSVK,VGDYV<br>YFENSSSNPYLIR,EDFFFYSLVYDPQ<br>QK,SLTSIIYYMWK,QIDQFLVVAR,DI<br>SSSLIALADK,EVEEEVENPEMVDLPE<br>K                                                                                                                                                |                                                                                                                                                                                                                                                                                                                                     |
| IPI00128230.1 | Q9R190 | Mta2    | Metastasis-associated protein MTA2              | QIDQFLVVAR,DISSSLNSLADSNAR,T<br>PINRNQLTQNR                                                                                                                                                                                                                                  |                                                                                                                                                                                                                                                                                                                                     |
| IPI00125745.1 | Q924K8 | Mta3    | Isoform 1 of Metastasis-associated protein MTA3 | VGDYVYFENSSSNPYLIR,RPFVAINYA<br>AIR,DISNTLIMLADK,QIDQFLVVAR,SL<br>TSIIYYMWK                                                                                                                                                                                                  |                                                                                                                                                                                                                                                                                                                                     |
| IPI00132096.3 | Q9CQ65 | Mtap    | S-methyl-5'-thioadenosine phosphorylase         | EELQPGDMVIDQFIDR,IGIIGGTGLDD<br>PEILEGR                                                                                                                                                                                                                                      | TWGADVNMTTVPEVVLAK,IGIIG<br>TGLDDPEILEGR                                                                                                                                                                                                                                                                                            |
| IPI00118075.1 | P20357 | Mtap2   | Microtubule-associated protein 2                | IVQVVTAEAVAVLK,LINQPLPDLK,RGV<br>SGDREENSFSLNSSISSAR                                                                                                                                                                                                                         |                                                                                                                                                                                                                                                                                                                                     |
| IPI00848818.1 | Q05BJ2 | Mtap4   | microtubule-associated protein 4                | AAEQMSTLPIDAPSLENLEQK,ETETT<br>LPIKMDLAPPEDVLLTK,MDLAPPEDVL<br>LTK,DMSPLPESEVTLGK,ALETMAEQT<br>TDVVHSPSTDTTPGPDTEAALAK,GMV<br>SLSEIEEALAK,TEFIPLLDGDEK,PLVT<br>DMTPSLETMTLTK,DVAPPMEEEIVP<br>GNDTTSVK,VAEFNNVTPLSSEEVTSV<br>K,VGSLDNVGHLPAGGAVK,AAVGVTG<br>NDITTPPNKEPPPSPEK |                                                                                                                                                                                                                                                                                                                                     |
| IPI00282957.4 | A2AJI0 | Mtap7d1 | Isoform 1 of MAP7 domain-containing protein 1   | TAEGLLPFAEAEFLK,SLQLSAWESSI<br>VDR                                                                                                                                                                                                                                           |                                                                                                                                                                                                                                                                                                                                     |
| IPI00750596.1 | Q9D050 | Mtch2   | Putative uncharacterized protein                |                                                                                                                                                                                                                                                                              | EEGIVGFFAGLIPR,VLIQVGYEPL<br>PPTIGR,LCSGVLGTVVHGK                                                                                                                                                                                                                                                                                   |
| IPI00330599.1 | Q80WJ7 | Mtdh    | Protein LYRIC                                   |                                                                                                                                                                                                                                                                              | VLTDSGSLDSTIPGIENIITVTEQLT<br>TASFPVGSK,GDSTLQVSSR                                                                                                                                                                                                                                                                                  |
| IPI00122862.4 | Q922D8 | Mthfd1  | C-1-tetrahydrofolate synthase, cytoplasmic      |                                                                                                                                                                                                                                                                              | TDPTTLTDEINR,EAGVQIAGR,T<br>PVPSDIAISR,ASQAPSSFQLLYDL<br>K,TDTDAELDLVSR,KVVGDVAYD<br>EAK,LDIDPETITWQR,ITIGQSPT<br>K,DVDGLTSVSAGK,YVVVTGITPT<br>PLGEGK,EIGLLTEVELYGETK,M<br>FGVPPVAVNVFK,KITIGQSPTK<br>,THLSLSHNPEQK,VVGDVAYDEA<br>K,AYTEEDLDLVEK,YSGLQPHVV<br>VLVATVR,IFHELTQTDK,VLLSAL<br>DR,STTTIGLVQALGAHLR,IYGAD<br>DIELLPEAQNK |

|               |         |                 |                                           |                                                                                                                                                                                                                                                                                                                                                                                                                                                                                                                                                                                                                                                                                                                                                                                                                                                                                                                                                                                                                                                                                                                                                                                                                                        |                                                                               |
|---------------|---------|-----------------|-------------------------------------------|----------------------------------------------------------------------------------------------------------------------------------------------------------------------------------------------------------------------------------------------------------------------------------------------------------------------------------------------------------------------------------------------------------------------------------------------------------------------------------------------------------------------------------------------------------------------------------------------------------------------------------------------------------------------------------------------------------------------------------------------------------------------------------------------------------------------------------------------------------------------------------------------------------------------------------------------------------------------------------------------------------------------------------------------------------------------------------------------------------------------------------------------------------------------------------------------------------------------------------------|-------------------------------------------------------------------------------|
| IPI00228113.5 | Mthfd11 | 111 kDa protein |                                           | ASGLVPNVVVLVATVR,FQFLYDV<br>QLPIVEK,KITIGQGSTEK,AEIDL<br>CELAK,THLSLSHEPDKK,ILHEST<br>QTDK,EIGLLADEIEIYGK,LIAEES<br>VSLAAALR,QIQIAQLFGVPVVA<br>LNVFK,YVLVAGITPTPLGEGK,VL<br>NALKPEK,LQPLSPVPSDIEISR,A<br>AVELVEK,DVDGVTDLNLGK,STVT<br>IGLVQALTAHLK,LSGGSPGVPVD<br>K,VQLSLLER,VIAQTVYGAK                                                                                                                                                                                                                                                                                                                                                                                                                                                                                                                                                                                                                                                                                                                                                                                                                                                                                                                                                | LNIDPATITWQR,THLSLSHEPDK,LQ<br>PLSPVPSDIEISR,THLSLSHEPDK,<br>STVTIGLVQALTAHLK |
| IPI00228583.5 | P62774  | Mtpn            | Myotrophin                                | GPDGLTALEATDNQAIK,TVKGPDGLT<br>ALEATDNQAIKALLQ                                                                                                                                                                                                                                                                                                                                                                                                                                                                                                                                                                                                                                                                                                                                                                                                                                                                                                                                                                                                                                                                                                                                                                                         |                                                                               |
| IPI00132938.2 | O35682  | Myadm           | Myeloid-associated differentiation marker |                                                                                                                                                                                                                                                                                                                                                                                                                                                                                                                                                                                                                                                                                                                                                                                                                                                                                                                                                                                                                                                                                                                                                                                                                                        | TTTTTTSSSTTVGSAR,ALTQPLGLL<br>R                                               |
| IPI00331361.2 | Q7TPV4  | Mybbp1a         | Myb-binding protein 1A                    | NLLPVLAQHVAGPSR,ALVDILSE<br>VPESMFQEILPK,LSVDLTAPLGVL<br>QSK,LVQQAGSQADASVALYYFN<br>ASLYLLR,AQDASLNVPER,KSPH<br>PQSALPK,KATPQIPETK,ILSQHP<br>NHLQGQPIK,LSQVNGATPVSP<br>PESK,FCLFHAFK,YLELFLAK,D<br>IPSDTQSPVSTK,LESLMGSVDLF<br>SEDNIPSLVNILK,FELFWK,ASTP<br>SQVNGITGAK,ATQTLQTLG<br>K,VLEEGLLK,NVTSVTSLTQQR,VY<br>SASLESLLTKR,DMFLQPDNL<br>K,STANQK,SPSLLQSGVK,YCHEVGP<br>SPSLLQSGVK,YCHEVGPCAEAL<br>CAEALHAQVER,ELSILELLNTLLR,E<br>HAQVER,ELSILELLNTLLR,SPAE<br>AARPCYSLAQLLQSFEDIPLCDIL<br>SCDVLGDIQTCIK,EAARPCYSLAL<br>DQIQEK,SPAESCDVLGDIQTCIK,FL<br>NAEALQSYVAWLRDMFLQPDNL<br>PQIPETK,NLLPVLAQHVAGPSRP<br>VDFSTANQK,VYSASLESLLTK,NLL<br>R,VYSASLESLLTK,VCFEDPEWE<br>PVLAQHVAGPSRPR,ATPQIPETK,V<br>QLITQLLQSGK,SPAPSNPTLSPSTPA<br>CFEDPEWEQLITQLLQSGK,SPAPSNP<br>K,LHGADTEDSEDQAANCLDLDF<br>TLSPSTPAK,LVQLADMMLLNHN<br>VTR,ALDLIEVLVTK,EFLDFFWDIA<br>GLGVGR,IPEISTYVGTFLGECQDD<br>KPDQETR,LVQLADMMLLNHN<br>LIT PK,SVFGHICPHLTPR,LLEYLR,L<br>LPN<br>GLGVGR,SVFGHICPHLTPR,LLEY<br>VALDLLR,LQQSLQQGNHSSGSNR,<br>LR,LPNVALDLLR,LQQSLQQGNH<br>LLGASPLLSEEQLQLVMR,LVSLVD<br>SSGSNR,LLGASPLLSEEQLQLV<br>HLHLEK,AEPATPAEAAQSDR,NSSL<br>MR,LVSLVDHLHLEKDEAVVEQIA<br>TVPMFLSLFSR<br>R,AEPATPAEAAQSDR,FLNAEAL<br>QSYVAWLR,NSSLTVPMFLSLFS<br>R |                                                                               |

|               |        |                      |                                         |                                                                                                              |                                                                                                                                                                                                                                                                                                                                                                                                                                                                                                                                                                                                                                                                                                                                                                                                    |
|---------------|--------|----------------------|-----------------------------------------|--------------------------------------------------------------------------------------------------------------|----------------------------------------------------------------------------------------------------------------------------------------------------------------------------------------------------------------------------------------------------------------------------------------------------------------------------------------------------------------------------------------------------------------------------------------------------------------------------------------------------------------------------------------------------------------------------------------------------------------------------------------------------------------------------------------------------------------------------------------------------------------------------------------------------|
| IPI00608114.2 | Mycbp2 | pam, highwire, rpm 1 |                                         |                                                                                                              | ANALFLLSLSSAAEPSILCYHPAK,F<br>SADTDILLGGLGLFGGR,LPKIIIEVGL<br>CEVFELIK,CFAIGYEFSPGPDEGVI<br>QLEK,FYNDAAGYAMNR,ILSEGVD<br>HCMVK,PILDIPYWNNAKPAPMPNIGS<br>K,QVTSLLR                                                                                                                                                                                                                                                                                                                                                                                                                                                                                                                                                                                                                                  |
| IPI00226891.1 | Q8C854 | Myef2                | Isoform 1 of Myelin expression factor 2 | LGSTIFVANLDFK,RDTHPGEPEKPPR                                                                                  | LGSTIFVANLDFK,RDTHPGEPEK<br>PPR                                                                                                                                                                                                                                                                                                                                                                                                                                                                                                                                                                                                                                                                                                                                                                    |
| IPI00122392.1 | Q9JK81 | Myg1                 | UPF0160 protein MYG1, mitochondrial     | LLAQLLGTSEEDSVVDTIYDK,IGTHNG<br>TFHCDEALACALLR,LNPTWNQPNQD<br>TEAGFR,KLLAQLLGTSEEDSVVDTIYD<br>K,AMDLVQEEFLQR |                                                                                                                                                                                                                                                                                                                                                                                                                                                                                                                                                                                                                                                                                                                                                                                                    |
| IPI00757312.1 | Q3UH59 | Myh10                | Putative uncharacterized protein        |                                                                                                              | DLSEELEALKTELEDTLDTTAAQQ<br>ELR,TVGQLYK,VEDMAELTCLNE<br>ASVLHNLK,ATISALEAK,ALELDP<br>NLYR,EQADFAVEALAK,ADFCIIH<br>YAGK,SLEAEILQLQEELASSER,N<br>SLQEQEEEEEEARK,YLFVDR,KE<br>EELQGALAR,FDQLLAEEK,TFHIF<br>YQLLSGAGEHLK,ALEEALAEK,L<br>QELEGAVK,KQQQLSALK,AGVLA<br>HLEEEER,VNKDDIQK,LDPHLVLD<br>QLR,LQQELDDLTVDLHQQR,ALE<br>EALAEKEEFER,NTNPNFVR,VVS<br>SVLQFGNISFK,KTTLQVDTLNTL<br>AAER,ELQAQIAELQEDFESEK,TT<br>LQVDTLNTELAAER,DAAGLESQ<br>QDTQELLQEETR,IVFQEFR,LQN<br>ELDNVSTLLEEAEEK,HATALEEL<br>SEQLEQAK,ELDDATEANEGLSR,<br>DKADFCIIHYAGK,DLEAQIEAANK<br>,KLDAQVQELHAK,TQLEEELEDEL<br>QATEDAK,HGFEAASIKEER,EDQ<br>SILCTGESGAGK,KHQQLLEEK,F<br>VAELWK,LQQLFNHTMFILEQEEY<br>QR,IGQLEEQLEQEAQ,KQELEEIL<br>HDLESR,INFVDTGYIVGANIETYL<br>LEK,LDAQVQELHAK,SDLLLEGF<br>NNYR,VIQYLAHVASSHK,KFDQLL<br>AEEK |
| IPI00129404.1 | Q02566 | Myh6                 | Myosin-6                                | ILNPAAIPEGQFIDSR,VQHELDEAEER<br>ADIAESQVNKLR,KLEGLDK,IEDMAML<br>TFLHEPAVLYNLK                                |                                                                                                                                                                                                                                                                                                                                                                                                                                                                                                                                                                                                                                                                                                                                                                                                    |

|               |          |       |                                                                            |                                                                                                                                                                                                                                                                                                     |                                                                                                                                                                                                                                                                                                                                                                                                                                                                                                                                                                                                                                                                                                                                                                                                                                                                                                                                                                                                                                                                                                                                                                                                                              |                                                                                                                                                                                                                                                                                                                                                                                                                                                                   |
|---------------|----------|-------|----------------------------------------------------------------------------|-----------------------------------------------------------------------------------------------------------------------------------------------------------------------------------------------------------------------------------------------------------------------------------------------------|------------------------------------------------------------------------------------------------------------------------------------------------------------------------------------------------------------------------------------------------------------------------------------------------------------------------------------------------------------------------------------------------------------------------------------------------------------------------------------------------------------------------------------------------------------------------------------------------------------------------------------------------------------------------------------------------------------------------------------------------------------------------------------------------------------------------------------------------------------------------------------------------------------------------------------------------------------------------------------------------------------------------------------------------------------------------------------------------------------------------------------------------------------------------------------------------------------------------------|-------------------------------------------------------------------------------------------------------------------------------------------------------------------------------------------------------------------------------------------------------------------------------------------------------------------------------------------------------------------------------------------------------------------------------------------------------------------|
| IPI00123181.4 | Q8VDD5   | Myh9  | Myosin-9                                                                   | <p>IAQLEEQLDNETK,QKHSQAVEELADQ<br/>LEQTK,ALELDSNLYR,TELEDTLDDSTA<br/>AQQELR,LQQELDDLLVDLDHQR,QAQ<br/>QERDELADEIANSSGK,SMEAEMIQLQ<br/>EELAAAER,ANLQIDQINTDLNLER,DL<br/>GEELEALK,DFSALESQQLDTELLQE<br/>ENR,VAEFTTNLMEEEEK,QLLQANPIL<br/>EAFGNAK,VSHLLGINVTDFTFR,HSQAV<br/>EELADQLEQTK,DMFQETMEAMR</p> | <p>TVGQLYK,VEDMAELTCLNEASVL<br/>HNLK,KANLQIDQINTDLNLER,NG<br/>FEPASLK,KVEAQLQELQVK,FDQ<br/>LLAEEK,VAAYDKLEK,DLEGLSQ<br/>R,ANLQIDQINTDLNLER,DFSALE<br/>SQLQDTQELLQEENR,FVSELWK,<br/>AGVLAHLEEEER,EQLEEEEEAKR,<br/>TDLLEPYNK,VISGVLQLGNIAFK,<br/>ALELDSNLYR,NWQWWR,KKVEA<br/>QLQELQVK,KGTGDCSDEEVDGK<br/>ADGADAK,GALALEEK,EQADFAI<br/>EALAK,EDQSILCTGESGAGK,IIGL<br/>DQVAGMSETALPGAFK,LQQLFN<br/>HTMFILEQEEYQR,ELETQISELQ<br/>EDLESER,EEILAQAK,NCAAYLR,<br/>RQLEEAEEEEAQR,FLSNGHVTIPG<br/>QQDK,LKDVLLQVEDER,KFDQLL<br/>AEEK,TELEDTLDDSTAQQELRSK<br/>,DVLLQVEDER,RGDLPFVVTR,AS<br/>IAALEAK,TFHIFYLLSGAGEHLK,<br/>LQVELDSVTGLLSQSDDSK,LQQL<br/>DDLLVDLDHQR,ADFCIIHYAGK,A<br/>SREEILAQAK,VNKDDIQK,KQELE<br/>EICHLEAR,LDPHLVLDQLR,INF<br/>DVNGYIVGANIETYLLEK,VSHLLG<br/>INVTDFTFR,DVLLQVEDERR,IAQL<br/>EEEEEEEQNTELELINDR,LKDVLL<br/>QVEDERR,NTNPNFVR,LQLQEQL<br/>QAETELCAEAELR,NAEQFKDQ<br/>ADK,VVFQEFR,DKADFCIIHYAGK<br/>,GDLPFVVTR,DLEAHIDTANK,IAQ<br/>LEEQLDNETK,LEVNLQAMK,NGF<br/>EPASLKKEEVGEEAIVELVENGKK,<br/>HSQAVEELADQLEQTKR,TQLEEL<br/>EDELQATEDAK,ITDVIIGFQACCR<br/>,NFINNPLAQADWAAK,VEAQLQE<br/>LQVK,HEDELLAK,HSQAVEELAD<br/>QLEQTK,VIQYLAHVASSHK,KLEG<br/>DSTDLSAQIAELQAQIAELK,IREL<br/>ETQISELQEDLESER,DLGEELEA</p> | <p>VKPLLNSIR,KLQAQMK,LQVELDSV<br/>TGLLSQSDDSK,VEDMAELTCLNEAS<br/>VLHNLK,LQQELDDLLVDLDHQR,AN<br/>LQIDQINTDLNLER,DFSALESQQLD<br/>TQELLQEENR,LVLDQLR,GMFRTV<br/>GQLYK,AGVLAHLEEEER,LDPHLVLD<br/>QLR,VSHLLGINVTDFTFR,LEGDSTD<br/>LSDQIAELQAQIAELK,ALEEAMEQK,<br/>THEAQIQEMR,VISGVLQLGNIAFK,K<br/>VIQYLAHVASSHK,IAQLEEQLDNET<br/>K,ALELDSNLYR,PAGPPGILALLDEE<br/>CWFPK,NFINNPLAQADWAAK,IIGL<br/>DQVAGMSETALPGAFK,HEDELLAK<br/>,QLLQANPILEAFGNAK,VIQYLAHVA<br/>SSHK</p> |
| IPI00118120.1 | Q99104   | Myo5a | Myosin-Va                                                                  |                                                                                                                                                                                                                                                                                                     | <p>ILAGILHLGNVGFASR,VLSLQEEIAK<br/>,ETLNHR,LATATETYIKPISK</p>                                                                                                                                                                                                                                                                                                                                                                                                                                                                                                                                                                                                                                                                                                                                                                                                                                                                                                                                                                                                                                                                                                                                                                |                                                                                                                                                                                                                                                                                                                                                                                                                                                                   |
| IPI00229766.1 | Q9QY06-2 | Myo9b | Isoform 2 of Myosin-IXb                                                    | <p>KPSLEGVEETESNGGQAAQETPAR,F<br/>LDEFLLNK</p>                                                                                                                                                                                                                                                      |                                                                                                                                                                                                                                                                                                                                                                                                                                                                                                                                                                                                                                                                                                                                                                                                                                                                                                                                                                                                                                                                                                                                                                                                                              |                                                                                                                                                                                                                                                                                                                                                                                                                                                                   |
| IPI00111831.1 | P70670   | Naca  | Nascent polypeptide-associated complex subunit alpha, muscle-specific form | <p>TTGGPAPVVRPAIAGVATTTSLR,IEDL<br/>SQAQALAAAEK,DIELVMSQANVSR,NI<br/>LFVITKPDVYK,SPASDTYIVFGEAK,VD<br/>PIMSDVTPTSPKK</p>                                                                                                                                                                            | <p>IEDLSQAQALAAAEK,DIELVMSQ<br/>ANVSR,NILFVITKPDVYK,SPASD<br/>TYIVFGEAK</p>                                                                                                                                                                                                                                                                                                                                                                                                                                                                                                                                                                                                                                                                                                                                                                                                                                                                                                                                                                                                                                                                                                                                                  | <p>IEDLSQAQALAAAEK,SPASDTYIVF<br/>GEAK</p>                                                                                                                                                                                                                                                                                                                                                                                                                        |

|               |          |        |                                               |                                                                                                                                                                                                                                                                                                                                                     |                                                                                                                                                                                                                                                                                                                                                                                                                                                                                                                                                                     |                                                             |
|---------------|----------|--------|-----------------------------------------------|-----------------------------------------------------------------------------------------------------------------------------------------------------------------------------------------------------------------------------------------------------------------------------------------------------------------------------------------------------|---------------------------------------------------------------------------------------------------------------------------------------------------------------------------------------------------------------------------------------------------------------------------------------------------------------------------------------------------------------------------------------------------------------------------------------------------------------------------------------------------------------------------------------------------------------------|-------------------------------------------------------------|
| IPI00114925.1 | Q99J77   | Nans   | Putative uncharacterized protein              | GSDHSASLEPGELAE LVR,IPAGTTLTLDMLTVK,ELQSYAQEIGIFFTASGMDEMAVEFLHELNVPPFK,LFPDIPIGYSGHETGIAISVAVALGAK,VLVTIEEDDTVMEESVESHK,PMVISSGMQSM DTMK                                                                                                                                                                                                           |                                                                                                                                                                                                                                                                                                                                                                                                                                                                                                                                                                     |                                                             |
| IPI00123199.1 | P28656   | Nap111 | Nucleosome assembly protein 1-like 1          |                                                                                                                                                                                                                                                                                                                                                     | FYEEVHDLER,LDGLVDTPTGYIE SLPK,FEIINAIYEPT EEECEWKPD FYEEVHDLER,LDGLVDTPTGYIESL EEDEVSEELKEK,NVDLLSDMVQ PK,QLTVQMMQNPQILAALQER,NV EHDEPILK,FSDAGQPMSFVLEFH DLLSDMVQEHEDEPILK,YAVLYQPLF FEPNDYFTNEVLTK,GIPEFWLTV DK,GIPEFWLTVFK FK                                                                                                                                                                                                                                                                                                                                    |                                                             |
| IPI00881096.1 |          | Napg   | 39 kDa protein                                | LPEAVQLIEK,LGLSLVPPGGGIK                                                                                                                                                                                                                                                                                                                            | EAVAHENNR,LGLSLVPPGGGIK                                                                                                                                                                                                                                                                                                                                                                                                                                                                                                                                             |                                                             |
| IPI00387212.1 | Q80UM3   | Narg1  | NMDA receptor-regulated protein 1             | DLSLLQIQMR,WMDEAQA LDTADR                                                                                                                                                                                                                                                                                                                           | DLSLLQIQMR,FLLMLQSVK,SHVC WHVYGLLQR,AIELATTLDGSLTN R,GELLLQLCR,RLPLNFLSGEK,T QQTSPDKVDY EYSELLYQNQVL LFHSVCESK,MPAVSLPPK,RLPLNF R,VAIVEELVVG YETSLK,LEDAAD LSGEK,LHDNPLTDENK VYR,YQLLQLRPAQR,IGQPSIALE YINTAIESTPTLIELFLVK,LAVEET KGELLLQLCR                                                                                                                                                                                                                                                                                                                        |                                                             |
| IPI00223415.4 | Q8BP47   | Nars   | Asparaginyl-tRNA synthetase, cytoplasmic      |                                                                                                                                                                                                                                                                                                                                                     | ISALEGYR,LEDLVCDV VDR,SPVA GYCEVTTPTLVQTQVEGGATLFK,E SIVYELNPNFKPPK,NLMFLVLR PFPTIYVDSQK                                                                                                                                                                                                                                                                                                                                                                                                                                                                            |                                                             |
| IPI00830976.1 | B1AU75   | Nasp   | nuclear autoantigenic sperm protein isoform 2 | MENGLGNALEGVHVEEEEGEK,PTD GASSNCVTDISHLVRK,EAAIPGLNED EVASGK,SADVGG EEPKDQVATSESE LGK,EIEELKELLPEIR,AELVPEQEEAM LPVEESEAGDGVETK,HLVMDIPAA VNAFQEAASLLGK,EGEETEGSEED RENDKAEETPNESVLEK,I EDAPAPST SADKMESLDVDSEAK,ATLVESSTSGF TSPGAGASVSMI ASR,EFRETVEEGEE IISLEK,EVSENMEAEAENQAESQTAE GTVESAAATIK,ETVEEGEEIISLEK,TED ESLVENNDNVDEEAR,VVEIEA EIDPQVK | SLTKPETDKEQESEVEK,SIDVIEK ,PETDKEQESEVEK,EAAIPGLNE DEVASGK,SADVGG EEPKDQVAT SESELGK,LQETVEPTSK,S LLELAR,AKQEPEVNGGSGDAVSSGK,G KLLGLGQK,I EDAPAPSTSADK,LQE GREDMDISEPEEK,SISGAYVQNK TVEPTSK,S LLELAR,SISGAYVQNK, ,LGEVSVESENYIQAVEEFQA CLS ELLPEIR,LGEVSVESENYIQAVEEF LQEYLEAHDR,YGETANECGEA QA CLSLQEYLEAHDR,SGNVAELA LK,HLVMDIPAAVNAFQEAASLLG FFFYGK,HLVMDIPAAVNAFQEA K,IAANEETQER,EIEELK,VVEIEAEI QYDEAVAQFGK,SLQENEEEEEIG DPQVK,KPTDGASSNCVTDISHLV NLELAWDMLDLAK,ATLVESSTSG R FTPSGAGASVSMI ASR,EAQLYAA QAHLK,ETVEEGEEIISLEK,VVEIE AEIDPQVK,KPTDGASSNCVTDI SHLVR |                                                             |
| IPI00276866.1 | Q8K224   | Nat10  | N-acetyltransferase 10                        |                                                                                                                                                                                                                                                                                                                                                     | LGQAELVVIDEAAA IPLPLVK,TLH EVSLQESIR,SLFVVVGDR,LDYLG VSYGLTPR,LYFLNQLGDLSLSAA QSALLGIGLQHK                                                                                                                                                                                                                                                                                                                                                                                                                                                                          | QSSAQSQVSTTAENK,NMVDYHLIM DLIPAISR,ILGNTFGM CVLQDFEALTNLLAR |
| IPI00400163.3 | Q6PGB6-4 | Nat13  | Isoform 4 of N-acetyltransferase NAT13        |                                                                                                                                                                                                                                                                                                                                                     | RIEPADAHVLQK,FGFEI IETK                                                                                                                                                                                                                                                                                                                                                                                                                                                                                                                                             |                                                             |

|               |          |        |                                                              |                                                                                                        |                                                                                                                                                                                                                                                                                                                                                                   |                                                                                                                                                                                                                                     |
|---------------|----------|--------|--------------------------------------------------------------|--------------------------------------------------------------------------------------------------------|-------------------------------------------------------------------------------------------------------------------------------------------------------------------------------------------------------------------------------------------------------------------------------------------------------------------------------------------------------------------|-------------------------------------------------------------------------------------------------------------------------------------------------------------------------------------------------------------------------------------|
| IPI00172226.3 | Q8K2Z4-2 | Ncapd2 | Isoform 2 of Condensin complex subunit 1                     |                                                                                                        | LPQEEGDHQIADAETAEEVK,ITE<br>AIGIISK,GKPEIVGSNLDALVR,NAI<br>QLLASFLANNPFSCCK,RMLPLIWS<br>K,ELLDGNQVLAAFVPLLLK,FQAV<br>VALAVGR,NAVLAIAEMVLQVLN<br>GDQLEESAR                                                                                                                                                                                                         | HLSSQLR,LQPLTSVDSNDNFVTPK,<br>NAIQLLASFLANNPFSCCK,NATEADP<br>K,ELLDGNQVLAAFVPLLLK,SAHLN<br>ALK,GQVSEMAVLLIDPVPQIAALAK                                                                                                               |
| IPI00122202.5 |          | Ncapg  | non-SMC condensin I complex, subunit G                       |                                                                                                        | DLLLLLDEILEHVTDRL,LLSDFLDS<br>EVSELR,IQIVTEIIEIR,IQAVLALS<br>R                                                                                                                                                                                                                                                                                                    |                                                                                                                                                                                                                                     |
| IPI00317794.5 | P09405   | Ncl    | Nucleolin                                                    | FGYVDFESAEDLEK,GYAFIEFASFEDA<br>K,FAISELFAK,VEGSEPTTFFNLFIGNL<br>NPNK,GFGFVDFNSEEDAK,TLVLSNL<br>SYSATK | NLSFNITEDELKEVFEDAMEIR,ET<br>LEEVFEK,FGYVDFESAEDLEK,N<br>DLAVVDVR,GYAFIEFASFEDAK,E<br>VFEDAMEIR,ALELTGLK,VFGNEI<br>K,KAAVTPGK,NLSFNITEDELK,TL<br>VLSNLSYSATK,GFGFVDFNSEED<br>AK,GLSEDTTEETLK,VTLDWAKP<br>K,TSTWSGESK,EALNSCNK,SVS<br>LYYTGEK,FAISELFAK,KFGYVDF<br>ESAEDLEK,GLSEDTTEETLKESF<br>EGSVR,VEGSEPTTFFNLFIGNLN<br>PNK,LELQGSNSR,GIAYIEFK,SEA<br>DAEKNLEEK | FGYVDFESAEDLEK,ETLEEVFEK,N<br>DLAVVDVR,ESFEGSVR,ALELTGLK<br>,VFGNEIK,NLSFNITEDELK,QGAEID<br>GR,TLVLSNLSYSATK,GLSEDTTEE<br>TLK,VTLDWAKPK,TSTWSGESK,VT<br>LDWAK,SVSLYYTGEK,FAISELFAK,<br>VEGSEPTTFFNLFIGNLNPNK,KAVA<br>TPAK,LELQGSNSR |
| IPI00113730.3 | Q05BA5   | Ncoa3  | nuclear receptor coactivator 3                               | ALLDQLHTLLSNTDATGLEEIDR,MGP<br>SQNAMVQHPQPTPMYQPSDMK,AML<br>EEGEDLQCCMICVAR                            |                                                                                                                                                                                                                                                                                                                                                                   |                                                                                                                                                                                                                                     |
| IPI00274795.4 | Q5RIM6   | Ncor1  | Nuclear receptor co-repressor 1, isoform CRA_a               | VEDHGVVMShpVgimpGSASTSVVTS<br>SEAR,SSHIEVSQASQLLQQQQQQQ<br>LR,GKPYDGITTIKEMGR                          |                                                                                                                                                                                                                                                                                                                                                                   |                                                                                                                                                                                                                                     |
| IPI00553262.1 | P03921   | ND5    | NADH-ubiquinone oxidoreductase chain 5                       |                                                                                                        | ANPYSSFSTLLGFFPSIIHR,TSLTL<br>LDLIWLEK                                                                                                                                                                                                                                                                                                                            |                                                                                                                                                                                                                                     |
| IPI00112460.1 | Q9CZA6   | Nde1   | Isoform 1 of Nuclear distribution protein nudE homolog 1     | LEFGKPASEPASPALPSAQGVVK,TFE<br>SEEEETNYWR,PASEPASPALPSAQG<br>VVK,TDMAVQATGSPSTPVAHR,ISAL<br>NIVGDLLR   |                                                                                                                                                                                                                                                                                                                                                                   |                                                                                                                                                                                                                                     |
| IPI00131850.3 | Q9CPR8   | Ndn12  | Melanoma-associated antigen G1                               | VAELVQFLLIK,SHSYILINMLEPVEADA<br>EMR                                                                   |                                                                                                                                                                                                                                                                                                                                                                   |                                                                                                                                                                                                                                     |
| IPI00315302.5 | Q9CQ75   | Ndufa2 | NADH dehydrogenase [ubiquinone] 1 alpha subcomplex subunit 2 |                                                                                                        | AMQNVLSGK,DFIVQR,TVSLNNL<br>SADEVTR,AHPNLPILIR,KAHPNL<br>PILIR                                                                                                                                                                                                                                                                                                    |                                                                                                                                                                                                                                     |
| IPI00132216.1 | Q9CQ91   | Ndufa3 | NADH dehydrogenase [ubiquinone] 1 alpha subcomplex subunit 3 |                                                                                                        | ATPYNYVPVVR,YASMINK                                                                                                                                                                                                                                                                                                                                               |                                                                                                                                                                                                                                     |
| IPI00125929.2 | Q62425   | Ndufa4 | NADH dehydrogenase [ubiquinone] 1 alpha subcomplex subunit 4 |                                                                                                        | FYSVNVVDSK,NNPEPWNK,LALF<br>NPDVSWDR,LGPNEQYK,KNNPE<br>PWNK                                                                                                                                                                                                                                                                                                       |                                                                                                                                                                                                                                     |



|               |        |        |                                                                      |                                                                      |                                                                                                                                                                                                                                                                  |
|---------------|--------|--------|----------------------------------------------------------------------|----------------------------------------------------------------------|------------------------------------------------------------------------------------------------------------------------------------------------------------------------------------------------------------------------------------------------------------------|
| IPI00308882.4 | Q91VD9 | Ndufs1 | NADH-ubiquinone oxidoreductase 75 kDa subunit, mitochondrial         |                                                                      | SNYLLNTTIAGVEEADVLLVGTN<br>PR,GLLTYTSWEDALSR,NRLEE<br>VSPNLVR,YDDIEETNYFQQASELA<br>K,VTTGVAAEWK,VAGMLQNFEG<br>NAVAAIAGGLVDAEALVALK,ALS<br>EIAGITLPYDTLDQVR,YDHLGDS<br>PK,ILQDIASGR,IASQVAALDLGYK<br>PGVEAIR,MLFLLGADGGCITR,VA<br>VTPPGLAR,LVNQEVLDPLVPPQ<br>LTIK |
| IPI00128345.2 | P52503 | Ndufs6 | NADH dehydrogenase [ubiquinone] iron-sulfur protein 6, mitochondrial |                                                                      | IIACDGGGGALGHPK,ITHTGQVY<br>DEK,EVNENFAIDLIAQQPVNEVE<br>HR                                                                                                                                                                                                       |
| IPI00462445.2 | P46935 | Nedd4  | E3 ubiquitin-protein ligase NEDD4                                    | ILFEVFDENR,RPSPDDDLTDEDNDDM<br>QLQAQR,WNEEILFR                       | VIAGIGLAK,EGFFELIPQDLIK<br>RIMGVKR,DDFLGQVDVPLYPLPTE<br>NPR,EGFFELIPQDLIK,VTLYDPMMSG<br>ILTSVQTK,LAVCGNPATSQPVTSSN<br>HSSR,TGGSEIVVTNK,LITLHDMES<br>VDSEYYSSLR,LLQFVTGTSR,GGSL<br>QTCIFEEQPTLPVLLPTSSGLPPGW<br>EEK,VFFINHNIK                                     |
| IPI00127021.1 | P29595 | Nedd8  | NEDD8                                                                |                                                                      | ILGGSVLHLVLALR,EGIPPQQQR,<br>EIEIDIEPTDK                                                                                                                                                                                                                         |
| IPI00132005.1 | Q9CQ45 | Nenf   | Neudesin                                                             | YGGEEEDQPIYLAVK,MSLDPADLTHD<br>TTGLTAK                               |                                                                                                                                                                                                                                                                  |
| IPI00453692.4 | Q6P5H2 | Nes    | Isoform 1 of Nestin                                                  | QGLQSQIAQILEGGQQLAHLK,ENQEP<br>LRFEEAEDQVLER                         |                                                                                                                                                                                                                                                                  |
| IPI00123537.3 | B1AY10 | Nfx1   | Isoform 1 of Transcriptional repressor NF-X1                         | IIHDLAQVYGLESISYDSEPK,LAEAFDI<br>TDDSDPFNVR                          |                                                                                                                                                                                                                                                                  |
| IPI00119201.1 | Q9DB96 | Ngdn   | Neuroguidin                                                          | TAVTGSLSENDPLR,VNYEESMMVRL<br>SVSK,VNYEESMMVR                        |                                                                                                                                                                                                                                                                  |
| IPI00310568.2 |        | Ngrn   | neugrin                                                              | AGSDTLPSAVLLEELKPGEPGDQSFS<br>SK,TLTWEAMEQIR,IQVLEESLVPATT<br>ALGHQR |                                                                                                                                                                                                                                                                  |
| IPI00133555.4 | Q9CXX8 | Nip7   | 60S ribosome subunit biogenesis protein NIP7 homolog                 |                                                                      | VDPMAIVVFHQADIGEYVR,LAANIS<br>GDK,LVSLGTCTFGK,VWVKPGAEQS<br>FLYGNHVLK                                                                                                                                                                                            |
| IPI00421052.1 | Q6KCD5 | Nipbl  | Isoform 1 of Nipped-B-like protein                                   | SADACLTTINIMTSPNMPK,DKVEKMG<br>LVEDLNK,DDNLVSQLVHSLNQVSTDH<br>IELK   |                                                                                                                                                                                                                                                                  |
| IPI00119945.1 | Q9JHW2 | Nit2   | Nitrilase homolog 2                                                  | AGTEETILYSIDILK,LALIQLQVSSIK                                         |                                                                                                                                                                                                                                                                  |
| IPI00228608.1 | Q8CCN1 | Nlrp10 | NACHT, LRR and PYD domains-containing protein 10                     |                                                                      | AECVLHILMRR,EVPCSLITRPPAL<br>QSLEPMLGERR                                                                                                                                                                                                                         |
| IPI00881976.1 | Q99L48 | Nmd3   | Isoform 1 of 60S ribosomal export protein NMD3                       | TFYYLEQLILKYGMHQNTLR,DATIPVE<br>SDTDDEGAPR                           |                                                                                                                                                                                                                                                                  |

|               |        |       |                                                         |                                                                                                                                                                                        |                                                                                                                                          |                                                                                                                                 |
|---------------|--------|-------|---------------------------------------------------------|----------------------------------------------------------------------------------------------------------------------------------------------------------------------------------------|------------------------------------------------------------------------------------------------------------------------------------------|---------------------------------------------------------------------------------------------------------------------------------|
| IPI00127417.1 | Q01768 | Nme2  | Nucleoside diphosphate kinase B                         | VMLGETNPADSKPGTIR,YMNSGPVV<br>AMVWEGLNVVK,EIHLWFKPEELIDYK                                                                                                                              | GDFCIQVGR,GLVGEIHK,VMLGE<br>TNPADSKPGTIR,GLVGEIHK,YMN<br>SGPVVAMVWEGLNVVK,NIIHGS<br>DSVESAEK,DRPFFPGLVK,TFIAI<br>KPDGVQR,EIHLWFKPEELIDYK | GDFCIQVGR,VMLGETNPADSKPGT<br>IR,GLVGEIHK,YMNSGPVVAMVWEG<br>LNVVK,NIIHGSDSVESAEK,DRPFFP<br>GLVK,TFIAIKPDGVQR,EIHLWFKPE<br>ELIDYK |
| IPI00224128.7 | O70310 | Nmt1  | Glycylpeptide N-<br>tetradecanoyltransferase 1          | RVHLEGIFQAVYTAGVVLPK,VHLEGIF<br>QAVYTAGVVLPK,FGIGDGNLQYYLYN<br>WK,GFDVFNALDLMENK,LVGFISAIPA<br>NIHIYDTEK,YQFWDTPVPK,AAYSFY<br>NVHTQTPLLDLMSDALVLAK,SYQFWD<br>TQPVPK,LGEVVNTHGPVEPKDNIR | AIELFSVGQGPAK,AAYSFYNVHT<br>QTPLLDLMSDALVLAK,LGEVVNT<br>HGPVEPKDNIR,MVEINFLCVHK                                                          |                                                                                                                                 |
| IPI00117252.1 | O70311 | Nmt2  | Glycylpeptide N-<br>tetradecanoyltransferase 2          | LVGFISAIPANIR,GFDVFNALDLMENK,<br>YQFWDTPVPK,EHIIDTFVVENPSGK                                                                                                                            |                                                                                                                                          |                                                                                                                                 |
| IPI00125382.2 | Q9WV70 | Noc2l | Nucleolar complex protein 2 homolog                     |                                                                                                                                                                                        | LFHEVVQAFR,VLSTLGSSEILQPL<br>LYPLSQIIIGCIK                                                                                               | LLLSSSPLWGK,VLSTLGSSEILQP<br>LLYPLSQIIIGCIK,KNPVPVTLAMV<br>ER,PINFVILK                                                          |
| IPI00330054.1 | Q8BHY2 | Noc4l | Nucleolar complex protein 4 homolog                     |                                                                                                                                                                                        | LALTAPPEALLMVLPLICNLLR,AA<br>SVINQVLSVPEVSIAPLLELTAYEI<br>FEQDLK                                                                         |                                                                                                                                 |
| IPI00153791.2 | Q8BJW5 | Nol11 | Isoform 1 of Nucleolar protein 11                       |                                                                                                                                                                                        |                                                                                                                                          | PADTAHEPGSFVPTSCPVAPKR,KV<br>ETNLQPEVPGFK,ELPQGTSGQLW<br>YHGEVLFMLHGK,HIEVELR,AALLN<br>AVLHSAYSEPFLPHLK                         |
| IPI00307884.1 | Q8BG17 | Nol12 | Nucleolar protein 12                                    | TESVQYDHPNHTVTVTISDLDSGAR<br>,EEALEEAELEL,LLGLPLPEQGDQD<br>GSQEEEMSLEKPTK                                                                                                              |                                                                                                                                          |                                                                                                                                 |
| IPI00353796.4 | Q8R5K4 | Nol6  | Isoform 1 of Nucleolar protein 6                        |                                                                                                                                                                                        | SSVWTQDGPSAQILQQLVSLAAE<br>ALPILEK,LLWGLEGLPLTVSAVQ<br>GAHPVLR,LAEVLQEH                                                                  | MGPAPAGEQHRR,LLPLLSALHGL<br>QQQPAYSGVAR,LLWGLEGLPLTV<br>SAVQGAHPVLR                                                             |
| IPI00318561.1 | Q9D7Z3 | Nol7  | Isoform 1 of Nucleolar protein 7                        |                                                                                                                                                                                        |                                                                                                                                          | LLPDAVLEQLTTASEADIK,VQLRPR                                                                                                      |
| IPI00720058.4 |        | Nolc1 | nucleolar and coiled-body<br>phosphoprotein 1 isoform C |                                                                                                                                                                                        | QPAGSNQKPQSR,GGSSISVQVNS<br>VK,VREEIEVDSR                                                                                                | AAGGAVSTPAPGK,AQGLPTQK,AA<br>GGAVSTPAPGK,VVPSDLYPLVLR,<br>KAAGGAVSTPAPGK,AGPYSSVPPP<br>SVPLPK                                   |
| IPI00222429.6 | Q6GQT9 | Nomo1 | nodal modulator 1                                       |                                                                                                                                                                                        | AGLFLEGQIHPELEGVEIVISEK,S<br>ESLDNPIQTVSLGQSLFFHFPLL<br>R,VIEVGNNDDVDDVNIIVFR                                                            |                                                                                                                                 |

|               |        |        |                                                                |                                                                                                                                                                                                                                                                                                                    |                                                                                                                                                                                                                       |                                                                                                                                                                        |
|---------------|--------|--------|----------------------------------------------------------------|--------------------------------------------------------------------------------------------------------------------------------------------------------------------------------------------------------------------------------------------------------------------------------------------------------------------|-----------------------------------------------------------------------------------------------------------------------------------------------------------------------------------------------------------------------|------------------------------------------------------------------------------------------------------------------------------------------------------------------------|
| IPI00320016.7 | Q99K48 | Nono   | Isoform 1 of Non-POU domain-containing octamer-binding protein | GAMPPAPVPPGTPAPPGPATMMPDG<br>TLGLTPPTTER,PVTVEPMDQLDDEEG<br>LPEK,NLPQYVSNELLEAFSVFGQVE<br>R,FGQAATMEGIGAIGGTPPAFNRPA<br>GAEFAPNK,TLAEIAK,EKLEMEMEAAR<br>,FAQPGSFYEYAMR,FGQAATMEGIG<br>AIGGTPPAFNRPAEAFAPNKR,GIV<br>EFSGK,AVVIVDDR,LFVGNLPPDITEE<br>EMR,FGQAATMEGIGAIGGTPPAFNR,<br>AGEVFIHK,RMEELHNQEVQK,AFNLE<br>K | RMEELHNQEVQK,NLPQYVSNEL<br>LEAFSVFGQVER,FACHSASLTV<br>R,AVVIVDDR                                                                                                                                                      | AGEVFIHK,GAMPPAPVPPGTPAPP<br>GPATMMPDGTGLGLTPPTTER,NLPQ<br>YVSNELLEAFSVFGQVER,FACHS<br>ASLTVR,FAQPGSFYEYAMR                                                            |
| IPI00458704.2 | Q9CPT5 | Nop16  | Nucleolar protein 16                                           | KPYVVNDLEAEASLPEK,YMVENHGE<br>DYK,QNLAEMGLAMPNK,NYYQDTP<br>K,AMEVDTEERPR,KPYVVNDLEAEAS<br>LPEKK,FYPTWQAFIDSLQSK                                                                                                                                                                                                    |                                                                                                                                                                                                                       |                                                                                                                                                                        |
| IPI00311453.5 |        | Nop2   | nucleolar protein 1                                            | ILDMCAPGGKTSYIAQLMK,FSNSIPQ<br>PHAGNSAAATPTEPDLK,GPLSTEPS<br>VPDAQVSTRPSQSAGNADVNSK,ELLL<br>SAIDSVNAASK                                                                                                                                                                                                            | VLLDAPCSGTGVISK,LMELFPLS<br>ELIEFLEANEVPRPITLR,LGVTNTI<br>ISHYDGR                                                                                                                                                     | SVVGNLHR,IQDIVGVLR,VLLDAPC<br>SGTGVISK,LVPTGLDFGQEGFTR,L<br>GVTNTIISHYDGR,LMELFPLSELIEF<br>LEANEVPR,AGSVDVCPKNK                                                        |
| IPI00318048.5 | Q9D6Z1 | Nop56  | Nucleolar protein 56                                           | EAVVQAEAAAAEITR,LSFYETGEIPR,E<br>ELASDLEEMATSSAK                                                                                                                                                                                                                                                                   | EAVVQAEAAAAEITR,KRLAALAL<br>ASSENSSTPEECEEVNEK,LLEET<br>YLPSKK,YGLIFHSTFIGR,LAQFIG<br>NR,IGAAIQEELGYNCQTGGVIAEI<br>LR,VLLGVGDPK,VDNMIIQSISLLD<br>QLDKDINTFSMR,LLLETYLPSK,Y<br>PASTVQILGAEK,LIAHAGSLTNLA<br>K,VVSLSEYR | EAVVQAEAAAAEITR,MSQVAPSL<br>ALIGEAVGAR,FHNVVR,IDCFSEVP<br>TSVFGEK,IVNDNATYCR,LSFYETG<br>EIPR,YPASTVQILGAEK,LLLETYLP<br>SK,VVSLSEYR,LIAHAGSLTNLAK,V<br>DNMIIQSISLLDQLDK |
| IPI00463468.3 | Q6DFW4 | Nop58  | Nucleolar protein 58                                           | YDAFGEDSSSAMGIENR,YGLIYHASL<br>VGQSSPK,SQMDGLIPGVEPR                                                                                                                                                                                                                                                               | LIAHAGSLLNLAK,HAASTVQILGA<br>EK,IISDNLYCK,FQDTAEALAAFT<br>ALMEGK,EAHEPLAVADAK,YGLIY<br>HASLVGQSSPK,KIEEVDKEDEIT<br>EK                                                                                                 | TQLYEYLQNR,LIAHAGSLLNLAK,H<br>AASTVQILGAEK,EAHEPLAVADAK,<br>LQEVDSLWK,FQDTAEALAAFTALM<br>EGK,TYDPSGDSTLPTCSK,VDTMIV<br>QAISLLDDLDK,YGLIYHASLVGQSS<br>PK                |
| IPI00130000.1 | Q11011 | Npepps | Puromycin-sensitive aminopeptidase                             |                                                                                                                                                                                                                                                                                                                    | FALEVAAK,VTLSPSTLQTGTGT<br>LK,VLTFALSEEVRPQDTVSVIGG<br>VAGGSK,LEAAAQVR,QADMQEE<br>KNRIER,AGIISTVEVLK,LPAEVSP<br>INYSCLCPDLLDFTFEGK                                                                                    | PGEGLDALLR,VTLSPSTLQTGT<br>GTLK,LEAAAQVR,LGLQNDLFLSLAR<br>,PIAAVMNTWTK,LPAEVSPINYSCL<br>KPDLLDFTFEGK,VLGATLSPELIQK                                                     |

|               |          |        |                                                                |                                                                                                                                                                                                                                                                                                                 |                                                                                                                                                                                                         |
|---------------|----------|--------|----------------------------------------------------------------|-----------------------------------------------------------------------------------------------------------------------------------------------------------------------------------------------------------------------------------------------------------------------------------------------------------------|---------------------------------------------------------------------------------------------------------------------------------------------------------------------------------------------------------|
| IPI00127415.1 | Q61937   | Npm1   | Nucleophosmin                                                  |                                                                                                                                                                                                                                                                                                                 | MQASIEK,DELHIVEAEAMNYEGS<br>PIK,TVSLGAGAK,TVSLGAGAKDE<br>LHIVEAEAMNYEGSPIK,MTDQEAI<br>QDLWQWR,MSVQPTVSLGGFEIT<br>PPVVL R,MSVQPTVSLGGFEITPPV<br>KDYHFK,TPKGPSSVEDIKAK,GP<br>SSVEDIK,FINYVK,VDNDENEHQLSLR |
| IPI00553335.1 | Q8VCQ3   | Nrbf2  | Nuclear receptor-binding factor 2                              | LPEVQGVFDRDPDTLLFLLQQK,SELW<br>GLPSHSESAAASSTWQK,DPDTLLFLL<br>QQK                                                                                                                                                                                                                                               |                                                                                                                                                                                                         |
| IPI00648408.1 | A2A9Q2   | Nrd1   | Nardilysin, N-arginine dibasic<br>convertase, NRD convertase 1 |                                                                                                                                                                                                                                                                                                                 | EMPVQFQVVELPSGHHLCK,QDFLT<br>GDQLLFEYKPEVIAEALNQLVPQK,Y<br>QALMDGLSLDSSLNFVK                                                                                                                            |
| IPI00131111.2 |          | Nsd1   | nuclear receptor-binding SET-domain<br>protein 1               | VGLFALSDIK,HRPAVMDLIDLTPR,IA<br>NSLTGSSTAPGSFLFSSSVQNTAK,GG<br>LANQTLPLK,LLESNDLDPGFMPK,IP<br>DNLGLDFISGGVSDK,PEDSAADPNHG<br>SHSESVAPR,PLLFSSASSQNHIEPD<br>YK,VQIFTADLSEIPR                                                                                                                                     |                                                                                                                                                                                                         |
| IPI00656325.2 | P46460   | Nsf    | Vesicle-fusing ATPase                                          |                                                                                                                                                                                                                                                                                                                 | YVGESEANIR,IDGVEQLNNILVIG<br>MTNRPDLIDEALLRPGR,AENSSL<br>NLIGK,LGANSGLHIIIFDEIDAICK,<br>TPLVSVLLEGPPHSGK,KAPPQGR<br>LVQQT,LLIIGTTSR,LQILHIHTAR                                                          |
| IPI00387232.1 | Q9CZ44-3 | Nsf1c  | Isoform 3 of NSFL1 cofactor p47                                | SPNELVDDLDFK,LGSTAPQVLNTSSPA<br>QQAENEAK,EFVAVTGTEEDR,KSPNE<br>LVDDLDFK,SYQDPSNAQFLESIRR,TGF<br>SLDNGDLR,ASSILINEAEPTTNIQIR,P<br>AMAATSFVLMTTFPNK,LGAAPEEESA<br>YVAGER,SYQDPSNAQFLESIR,DLIHD<br>QDEEEEEEGQR,EANLLNAVIVQR,L<br>AHGGQVNLDMEDHRDEDFVKPK                                                            | LGAAPPEESAYVAGER,RGEVPA<br>ELR<br>ASSILINEAEPTTNIQIR,HSGQDVH<br>VVLK,RGEVPAELR                                                                                                                          |
| IPI00133614.5 | Q91VT1   | Nsmce2 | Isoform 1 of E3 SUMO-protein ligase<br>NSE2                    | YISFSGIESALSSLK,ELSHYVKAVQSTI<br>NHVK                                                                                                                                                                                                                                                                           |                                                                                                                                                                                                         |
| IPI00228804.5 |          | Nsun2  | 88 kDa protein                                                 | WTTLNSLQLHGLQLR,QEAVSMIPPLL<br>LNVEPHHK,FYALDPSFPR,TLLTQENP<br>FFR,SEGALELADVSAELPGLK,FHQFL<br>VSETESGNISR,EGVILTNAASPEQP<br>GDEDAK,VEVPQPLSWYPEELAWHTN<br>LSR,QTAQDPCVPDVPDCAAAAEP<br>SR,EDPFVFIPEDDPLFPPIEK,LAQEGI<br>YTLYPFINSR,YEPDSANPDTLQCPIVL<br>CGWR,TTQLIEMLHADMSVPFPEGFVI<br>ANDVDNKR,DGQWFADWHEVPQGR | GAEQLAEGGR,IITVSMEDVK,ILP<br>HHQNTGGFFVAVLVK,FHQFLVS<br>ETESGNISR<br>WTTLNSLQLHGLQLR,GAEQLAEG<br>GR,TLLTQENPFFR,EDPFVFIPEDD<br>PLFPPIEK,LSSEAYSQVK,SEGALEL<br>ADVSAELPGLK                               |

|               |        |        |                                                                         |                                                                                                                                                                                   |                                                                                                                                                                                                                                              |                                                                                                                                                                             |
|---------------|--------|--------|-------------------------------------------------------------------------|-----------------------------------------------------------------------------------------------------------------------------------------------------------------------------------|----------------------------------------------------------------------------------------------------------------------------------------------------------------------------------------------------------------------------------------------|-----------------------------------------------------------------------------------------------------------------------------------------------------------------------------|
| IPI00132314.1 | Q02819 | Nucb1  | Nucleobindin-1                                                          | YLQEVINVLETDGHFR,KVPEQPPELP<br>QLDSQHL,LSQELDFVSHNVR,QQLQE<br>QSAPPSKPDGQLQFR,EVWEELDGLD<br>PNR,DLELLIQTATR,TVEMSPAYTEEE<br>LKRFEELAAR,LVTLEEFLLASTQR                             |                                                                                                                                                                                                                                              |                                                                                                                                                                             |
| IPI00309704.1 | P81117 | Nucb2  | Nucleobindin-2                                                          | LVTLEEFLLR,LHDVNNDGFLDEQELEA<br>LFTR                                                                                                                                              |                                                                                                                                                                                                                                              |                                                                                                                                                                             |
| IPI00132942.1 | O35685 | Nudc   | Nuclear migration protein nudC                                          | KTDFFIGGEEGMAEK,VGLKGQPPVW<br>DGELYNEVK,LITQTFNHHNQLAQK,W<br>TQTLAELDLAVPFR,VESSWLIEDGK,<br>GQPPVVDGELYNEVK,LKPNLNGAD<br>LPNYR,TDFFIGGEEGMAEK,LQLEIDQ<br>K,FMDQHPPEMDFSK          | KDAEDQEAQLK,LITQTFNHHNQL<br>AQK,DVVVDIQR,GKDVVVDIQR,G<br>LITQTFNHHNQLAQK,GQPPVVDGE<br>QPPVVDGELYNEVK,LVTSDEPEIN<br>LYNEVK,LVTSDEPEINTK,VVTVHLEK<br>TK,LKPNLNGADLPNYR,LQLEIDQ<br>,LKPNLNGADLPNYR,LQLEIDQK<br>QK,ELTDEEAER                     |                                                                                                                                                                             |
| IPI00461281.2 | Q9CQ48 | Nudcd2 | NudC domain-containing protein 2                                        | ENPGDFDFSGAEISGNVTK,LFDSTIADE<br>GTWTLEDR                                                                                                                                         |                                                                                                                                                                                                                                              |                                                                                                                                                                             |
| IPI00132473.3 | Q9CQF3 | Nudt21 | Cleavage and polyadenylation specificity factor subunit 5               |                                                                                                                                                                                   | TVEGVLIVHEHR,TINLYPLTNYTF<br>GTK,LFLVQLQEK,LPHVLLLQLGT<br>PNFEPPQYPYIPAHITKPK,LVAAPLF<br>TFFK,RTVEGVLIVHEHR,LVAAPL<br>ELYDNAPGYGPIISSLPQLLSR<br>FELYDNAPGYGPIISSLPQLLSR                                                                      |                                                                                                                                                                             |
| IPI00123572.1 | Q9JKX6 | Nudt5  | ADP-sugar pyrophosphatase                                               | PKPGDGEFMEVISLPK,HANSKPFEVP<br>FLKF,PFEVPFLK,PGDGEFMEVISLPK,<br>LDALGAEQHLLTVDAK                                                                                                  |                                                                                                                                                                                                                                              |                                                                                                                                                                             |
| IPI00405390.1 | Q8BVU5 | Nudt9  | ADP-ribose pyrophosphatase, mitochondrial                               | WVDISDQLK,LHALFSQEHLVIYK                                                                                                                                                          |                                                                                                                                                                                                                                              |                                                                                                                                                                             |
| IPI00330146.6 | Q5F2E7 | Nufip2 | Isoform 1 of Nuclear fragile X mental retardation-interacting protein 2 | DYEIENQNPLASPTNTLLGSAK,IITYNE<br>AMDSPDQ,SGETQAVDKTDIAIPNGVI<br>TSSSGYITNGYMSK,NSAKGCENLNLV<br>QDK,VMEVTFQGEYPATLVSQGAIEIP<br>SGTEHPVFPK,EDSWTLFKPPPVPVVD<br>NSSAK,ADTSSQGALVFLSK |                                                                                                                                                                                                                                              |                                                                                                                                                                             |
| IPI00263048.1 | Q80Y35 | Numa1  | Nuclear mitotic apparatus protein 1                                     | VEFAALQEALAHALTEK,EAEQMGGEL<br>ERLRAALIK,SSLISLEEEVSILNR                                                                                                                          | LATDNTQLQTR,IQQLLEEAHQAE<br>EALR,ELGELGSLR,TGQEVQEEA<br>VEIHSEGQPGQQSQAQLHASL<br>AK,LVDDLSALQEK,SLEAQVAHA<br>DQQLR,ELGHNQAASASAQR,LS<br>QLEDQATR,LTAQVEELSK,VTEL<br>EAQLK,IDHLALLNEK,LKEQQLLE<br>AAK,EKEHPAGGASGEDASGPGT<br>QSETAGK,AQLQEQLR | LATDNTQLQTR,EQALSALQLEHTS<br>TQALVSELLPAK,HLTAQVR,HELAE<br>ATASQHR,LQNTLNEQR,ELGHNQA<br>ASASAQR,VSSETHQGGPGTPESK,A<br>GEQQETASLELLK,RTTQIINITMTKK<br>,QQLASLIADLQSSVSNLSQAK |
| IPI00320303.1 | Q8R0G9 | Nup133 | Nuclear pore complex protein Nup133                                     |                                                                                                                                                                                   | GLSLGSAVNSPVLFPAGR,LPDLV<br>NSAILLALNKR,QLSLSAMPVLTAPQ<br>LISLYICDENRR,DGIQLSEYLPVTD<br>LLR,FLTAVQGGSFILSSVGSQVLR                                                                                                                            |                                                                                                                                                                             |

|               |        |        |                                                  |                                                                                                                                                                                                                                                                                 |                                                                                                      |
|---------------|--------|--------|--------------------------------------------------|---------------------------------------------------------------------------------------------------------------------------------------------------------------------------------------------------------------------------------------------------------------------------------|------------------------------------------------------------------------------------------------------|
| IPI00330624.1 | Q80WR0 | Nup153 | Nucleoporin 153                                  | TEFSGSNSSETVLSSSAQDITAVNSS<br>SYK,SSPAGFSFGAGVNNPPNAAIDTT<br>ATSENK,FGIPSSSSGLSQTLTSTGNF<br>K,ITPDPAGSNTEEPSTTSTASNYPDVL<br>TR,TVYFKPSLTPSGDLR,VQMTSLGST<br>GSPVTFSSPIVK,NTSLPPLWSPEAE<br>R,PAISTFSSSGIEYGESLK,GFGTSSSL<br>NPAPSAFK,IPSAVSSPLNSPLDR,KPA<br>FNLSAFGTLSTSLGNSSILK | SHSLSQHTAISSK,PQHQGILSR,MA<br>SEAGGIGGGGGGGK                                                         |
| IPI00453821.2 | Q99P88 | Nup155 | Nuclear pore complex protein Nup155              | LLCEHQFSVIVGELQK,FYEGVVE<br>LSLTAAEK,PNTLTLVHVR,LRPVD<br>QLR,EITAISSVPVQLLESVLQEL<br>K                                                                                                                                                                                          | ISLQAIQQLVR,EITAISSVPVQLLE<br>SVLQELK,LHQEDQACATCLILACST<br>AACDR                                    |
| IPI00129535.1 | Q9Z0W3 | Nup160 | Isoform 1 of Nuclear pore complex protein Nup160 |                                                                                                                                                                                                                                                                                 | LPPYDVPGIASVELK,LLDVVGLPE<br>LVIQLATSAITEAGDDWK,FYACVLQ<br>YQEALSHPLALHLPVTNMVCLLK,<br>VQNNLYHHCVINK |
| IPI00420602.3 | Q6ZQH8 | Nup188 | Nucleoporin NUP188 homolog                       | ASPESQEPLIQLVQAFVR,ILGPLT<br>EILEGVLQADQQLMEK,RDSAML<br>VLR,AAIAFLHALWQDR                                                                                                                                                                                                       |                                                                                                      |
| IPI00677736.2 | Q9D6C1 | Nup205 | Putative uncharacterized protein                 | LAWALALR,DDTLILLIGHLER,VL<br>LLSQIDVNNEFEK                                                                                                                                                                                                                                      |                                                                                                      |
| IPI00229722.3 | Q80U93 | Nup214 | Nuclear pore complex protein Nup214              | PTASGPLSHPTPLPASSSSMPLK,FAV<br>QDVNDVLDLEWDR,SDSSEVSATTPS<br>LPVQPQSTQASLQTSDPVKK,PTCTSV<br>AQPLEGEDAQPICK                                                                                                                                                                      |                                                                                                      |
| IPI00177202.1 | P59235 | Nup43  | Nucleoporin Nup43                                | HPDQQHVATGGQDGMLSIWDVR,IEI<br>TSLPSR,TPEIVTVNSIGLQK,TIDNAD<br>SSTLHAVTFLR                                                                                                                                                                                                       | SSLFHQGGR,IEITSLPSR                                                                                  |
| IPI00120572.3 | Q9JIH2 | Nup50  | Nucleoporin 50 kDa                               | GLVWPSGGGGFSGFGSGGK,PLEGL<br>TNGNSTDNATPFSNVK,AAFSGFAVN<br>GPTTLVDK,AAFSGFAVNGPTTLVDKK,<br>VVVTEVKEEDAFYSK,ATAGMEPPSLF<br>GSTK,AEDTSEKVEFTA EK,KIESSALG<br>SLSSGSLTGFSFSAGSSSLFGK,SDAA<br>QGATSASFSGK                                                                           |                                                                                                      |
| IPI00225192.1 | Q8BTS4 | Nup54  | Nucleoporin p54                                  | QQQEGLSHLISIIKDDLEDIK,TLPDDQT<br>EVVIYVVER,VLGGNQLTVNVEGIK,V<br>QLDTIQGELNAPTQFK                                                                                                                                                                                                |                                                                                                      |
| IPI00139994.1 | Q63850 | Nup62  | Nuclear pore glycoprotein p62                    | RLDQELDFILSQQK,ELEDLLSPLEESV<br>K,ILNAHMDSLQWVDQSSALLQR                                                                                                                                                                                                                         |                                                                                                      |
| IPI00461532.4 | Q8R480 | Nup85  | Nucleoporin NUP85                                | KLFNESHGIFVGLQK,RFGDAASL<br>LLSLMTSQIAPR                                                                                                                                                                                                                                        |                                                                                                      |
| IPI00229021.1 | Q8CEC0 | Nup88  | Isoform 1 of Nuclear pore complex protein Nup88  |                                                                                                                                                                                                                                                                                 | SAANPAFLK,LLCINPPLFEIHQVLLS<br>PTQHVALIGSK                                                           |

|               |          |                        |                                                                       |                                                                                                                                                                                                                                         |                                                                                                   |                                        |
|---------------|----------|------------------------|-----------------------------------------------------------------------|-----------------------------------------------------------------------------------------------------------------------------------------------------------------------------------------------------------------------------------------|---------------------------------------------------------------------------------------------------|----------------------------------------|
| IPI00222307.1 | Q8BJ71   | Nup93                  | Isoform 1 of Nuclear pore complex protein Nup93                       | EALQYFYFLR,NYTLVTVFGNLHQ<br>AQLGGVPGTYQLVR                                                                                                                                                                                              | HNLSEVLLATMNILFTQFKR,LESLS<br>AATTFEPLPEVK                                                        |                                        |
| IPI00464141.2 | Q6PFD9   | Nup98                  | Nucleoporin 98                                                        | FSFLSKPVDENNQQDGEDDSLVSRS,<br>HLFDGLDDDEPSLANGAFMPK,NLNN<br>SNLFSPVNHDESLASPSEYPENGER,<br>KAEVTLDGVWPTDK,NNSSSNVEDTIV<br>ALNMR,AEVTLDGVWPTDK,EEIENNA<br>YHIHPAGIVLTK,VGYTYTIPSMDDLAK,N<br>GLEGSSEETSFHDESLQDDR,EVIVYV<br>DDNQKPPVGEGLNR |                                                                                                   |                                        |
| IPI00224693.2 | Q9ERH4   | Nusap1                 | Isoform 1 of Nucleolar and spindle-associated protein 1               | DTAEVPSLPEQRPEDGNAASSGEGEV<br>NDIK,MESIDEYIMR                                                                                                                                                                                           |                                                                                                   |                                        |
| IPI00321884.1 | Q9DBY8   | Nvl                    | Nuclear valosin-containing protein-like                               |                                                                                                                                                                                                                                         | LPETFNFCHLAHLTPGFVGDLMAL<br>CR,TLGLGTPAGILLAGPPGCGK,QD<br>SEIQILK                                 |                                        |
| IPI00115588.3 | Q99JX7   | Nxf1                   | Nuclear RNA export factor 1                                           | SDPDLVAQNIDVVLNR,LNVVAFLNELP<br>K,IIENIPELLSLNLSSNR                                                                                                                                                                                     | LNVVAFLNELPK,ISIIINASAPPYT<br>VQNELKPEQIEQLK                                                      |                                        |
| IPI00133608.3 | Q9CRD0   | Ociad1                 | Isoform 1 of OCIA domain-containing protein 1                         |                                                                                                                                                                                                                                         | SVPLAATSMILITQGLISK,GILSSHPK                                                                      |                                        |
| IPI00845652.1 | Q60597-3 | Ogdh                   | Isoform 3 of 2-oxoglutarate dehydrogenase E1 component, mitochondrial | VASSVPVENFTIHGGLSR,KPLIVF<br>TPK,LNVLANVIR,FGLEGCEVLIPA<br>LK,DVVVDLVCYR,VFHLPTTTFIG<br>GQEPALPLR,KTHLTELR,IEQLS<br>PFPFDLLK,LVEDHLAVQSLIR,G<br>HHVAQLDPLGILDADLDSSVPADII<br>SSTDK,THLTELR,SSPYPTDVA<br>R                               | KPLIVFTPK,HHVLHDQNVDK,NITLS<br>LVANPSHLEAADPVVMGK,QNGIVL<br>LLPHGMEGMGPEHSSARPER                  |                                        |
| IPI00342603.7 |          | Ogdhl                  | oxoglutarate dehydrogenase-like                                       |                                                                                                                                                                                                                                         | LPTTTFIGGPENTLSLR,KPLIVFT<br>K,LEAADEGSGDVK,LNVLANVIR,<br>DVVVDLVCYR,LVEDHLAVQSLIR,<br>SSPYPTDVAR |                                        |
| IPI00111981.1 | Q9CZ30   | Ola1                   | Isoform 1 of Olg-like ATPase 1                                        | AFEDDDITHVEGSVDPIR,DIEIHEELQ<br>LKDEEMIGPILDK,DIEIHEELQLK,HLF<br>LTSKPMVYLVNLSEK,IPAFLNVVDIAG<br>LVK,YRQQGRNYIVEDGDIIFFK,NYIVE<br>DGDIIFFK,FYHDWNDKEIEVLNK                                                                              | IGIVGLPNVGK,VPVDER,IPAFLN<br>VVDIAGLVK                                                            | IGIVGLPNVGK,HLFLTsk,IPAFLNV<br>DIAGLVK |
| IPI00380674.1 | Q7TS44   | Olf192                 | Olfactory receptor Olf192                                             |                                                                                                                                                                                                                                         | KSVQGMKK,KSVQGMK                                                                                  |                                        |
| IPI00881883.2 |          | Olf192                 | olfactory receptor 286                                                |                                                                                                                                                                                                                                         | LVCSSWIFGMVNGILLDYMTFR,DK<br>PFSLLYTIITPMCNPIYSFR,VIFMD<br>AIVLLSPMVLIVTSYAR                      |                                        |
| IPI00403336.4 | P58281-2 | Opa1                   | Isoform 2 of Dynamin-like 120 kDa protein, mitochondrial              |                                                                                                                                                                                                                                         | VIQHNALEDR,VQLAEDLK,AKNEI<br>LDEVISLSQVTPK                                                        |                                        |
| IPI00165817.3 | Q3U473   | ORF19                  | Putative uncharacterized protein                                      | ATSQGGDLMSDLFNK,YVFLDPLAGAV<br>TK                                                                                                                                                                                                       |                                                                                                   |                                        |
| IPI00845721.1 | Q8R1N3   | OTTMUSG0000001<br>0657 | Predicted                                                             | GHQRIHTGEIAYK,VLDQDSQYIVHEH<br>MNIQEK                                                                                                                                                                                                   |                                                                                                   |                                        |

|               |        |         |                                                                   |                                                                                                                                                                                                                                                                               |                                                                                                                                                                                                                                                                                                                                   |
|---------------|--------|---------|-------------------------------------------------------------------|-------------------------------------------------------------------------------------------------------------------------------------------------------------------------------------------------------------------------------------------------------------------------------|-----------------------------------------------------------------------------------------------------------------------------------------------------------------------------------------------------------------------------------------------------------------------------------------------------------------------------------|
| IPI00169908.4 | A2AP24 | Otud6b  | OTU domain containing 6B                                          | IDSVAVNISNLVLENQPPR,IAEAEIENL<br>SGAR                                                                                                                                                                                                                                         |                                                                                                                                                                                                                                                                                                                                   |
| IPI00223738.2 | Q6P9R2 | Oxsr1   | Serine/threonine-protein kinase OSR1                              | LLSGGSVLDIIK,SGVLDEPTIATILR                                                                                                                                                                                                                                                   | RVPGSSGRLHK,KMISLCLQK,IPISL<br>VLR                                                                                                                                                                                                                                                                                                |
| IPI00122815.3 | Q922C8 | P4hb    | Putative uncharacterized protein                                  |                                                                                                                                                                                                                                                                               | VGADALEEEDNVLVLK,TGPAATT<br>LSDTAAAEESLVDSSSEVTIGFFK,I<br>LEFFGLK,MDSTANEVEAVK,ILFIF<br>IDSDHTDNQR,YKPESDELTAEK,L<br>ITLEEEMTK,VDATEESDLAQQYG<br>VR,VLVGANFEEVAFDEK,THILLF<br>LPK                                                                                                                                                 |
| IPI00119305.3 | P50580 | Pa2g4   | Proliferation-associated protein 2G4                              | ITSGPFEPDLYK,FTVLLMPNGPMR,IDL<br>GVHVDGFIANVAHTFVIGVAQGTQVT<br>GR,GIAFPTSISVNNCVCHFSPK,LVK<br>PGNQNTQVTEAWNK,ITSGPFEPDLYK<br>SEMEVQDAELK,HELLQPFNVLYEK,A<br>EFEVHEVYAVDVLVSSGEGK,TVENAT<br>SGETLEENGAGD                                                                       | AFFSEVER,ALLQSSASR,AAHLC<br>AEAALR,ITSGPFEPDLYK,SEMEV<br>QDAELK,IDLGVHVDGFIANVAHT<br>FVIGVAQGTQVTGR,LVKPGNQN<br>TQVTEAWNK,SLVEASSSGVSVL<br>SLCEK,TIIQNPTDQQK,HELLQPF<br>NVLYEK,AEFEVHEVYAVDVLVSS<br>GEGK,EGEFVAQFK                                                                                                                |
| IPI00124287.1 | P29341 | Pabpc1  | Polyadenylate-binding protein 1                                   | LFPLIQAMHPSLAGK,NLDDGIDDER,A<br>KEFTNVYIK,VDEAVAVLQAHQAK,IVA<br>TKPLYVALAQR,ALYDTFSAFGNILSCK<br>VCDENGSK,NFGEDMDDER,GYGFV<br>HFETQEAER,PAAAAAAATPAVR,KE<br>FSPFGTITSAK,ITGMLEIDNSELLHML<br>ESPEL,R,GFGFVSFER,FSPAGPILSIR<br>,SKVDEAVAVLQAHQAK,PLYVALAQR,<br>SLGYAYVNFQQPADAER | EFTNVYIK,NLDDGIDDER,AKEFT<br>NVYIK,VDEAVAVLQAHQAK,SGV<br>GNIFIK,IVATKPLYVALAQR,GYGF<br>VHFETQEAER,PAAAAAAATPA<br>VR,KEFSPFGTITSAK,GFGFVCF<br>SPEEATK,ITGMLEIDNSELLHML<br>ESPEL,R,EFSPFGTITSAK,YQGV<br>NLYVK,FGPALSVK,ALDTMNFV<br>K,ALYDTFSAFGNILSCK,GFGFV<br>FER,FSPAGPILSIR,SKVDEAVAV<br>LQAHQAK,PLYVALAQR,SLGYAY<br>VNFQQPADAER |
| IPI00120954.2 | Q62029 | Pabpc2  | poly A binding protein, cytoplasmic 2                             | NLDDGIDDER,GFGFVSFER,IVATKPL<br>YVALAQR,DVITR,PLYVALAQR                                                                                                                                                                                                                       |                                                                                                                                                                                                                                                                                                                                   |
| IPI00420950.3 | Q6PHQ9 | Pabpc4  | MCG5546, isoform CRA_c                                            | ITGMLEIDNSELLHMLESPESL,R,AKE<br>FTNVYIK,ALYDTFSAFGNILSCKVCD<br>ENGSK,PLYVALAQR,SLGYAYVNFQQ<br>PADAER                                                                                                                                                                          | ITGMLEIDNSELLHMLESPESL,R,K<br>FEQLK,ALYDTFSAFGNILSCK,KAHL<br>TNQYMQR,FSPAGPVLSIR,PLYVAL<br>AQR                                                                                                                                                                                                                                    |
| IPI00136169.1 | Q8CCS6 | Pabpn1  | Isoform 1 of Polyadenylate-binding protein 2                      | GFAYIEFSDK,GFAYIEFSDKESVR,QM<br>NMSPPPGNAGPVMISLEEK,TSLALDE<br>SLFR                                                                                                                                                                                                           |                                                                                                                                                                                                                                                                                                                                   |
| IPI00125880.1 | Q9WVE8 | Pacsin2 | Protein kinase C and casein kinase substrate in neurons protein 2 | ALYDYEGQEHELSFK,AYAQQLTEW<br>AR                                                                                                                                                                                                                                               |                                                                                                                                                                                                                                                                                                                                   |
| IPI00319933.4 | Q99JB8 | Pacsin3 | Protein kinase C and casein kinase II substrate protein 3         | AYAQQQLADWAR,SPDEVTLTIVPTR                                                                                                                                                                                                                                                    |                                                                                                                                                                                                                                                                                                                                   |



|               |        |          |                                                                                                                                  |                                                                                                                                                                                                           |                                                                                                                                                                                                                                                                                                                    |                                                                                                                                                                                                     |
|---------------|--------|----------|----------------------------------------------------------------------------------------------------------------------------------|-----------------------------------------------------------------------------------------------------------------------------------------------------------------------------------------------------------|--------------------------------------------------------------------------------------------------------------------------------------------------------------------------------------------------------------------------------------------------------------------------------------------------------------------|-----------------------------------------------------------------------------------------------------------------------------------------------------------------------------------------------------|
| IPI00309207.5 | P63005 | Pafah1b1 | Isoform 1 of Platelet-activating factor acetylhydrolase IB subunit alpha                                                         |                                                                                                                                                                                                           | GVLFHSGGK,YALSGHR                                                                                                                                                                                                                                                                                                  |                                                                                                                                                                                                     |
| IPI00624863.1 | Q9CQ38 | Paics    | Phosphoribosylaminoimidazole carboxylase, phosphoribosylaminoribosylaminoimidazole, succinocarboxamide synthetase, isoform CRA_a | DQITAGNAAR,ACGNFGIPCELR, EVTPEGLQMVK,TKEYYELLDTPGR,ASILNTWISLK,LPSGIGCSTILS PEGSAQFAAQIFGLNNHLVWAK,I TSCIFQLLQEAGIK,GPDETLR,IKA EYEGDGIPTVFVSVAGR,IEFGVD VTTK,EIVLADVIDNDSWR,VVVLG GSTSDLGHCEK,RNPGVQEGYK | LPSGIGCSTILSPEGSAQFAAQIFGL NNHLVWAK,ITSCIFQLLQEAGIK,IAT GSFLK,DQITAGNAAR,RNPGVQEG YK,SNGLGPVLSGNTAYPVISCPIT PDWGAQDVWSSLR,ASILNTWISLK                                                                                                                                                                              |                                                                                                                                                                                                     |
| IPI00132993.1 | O88643 | Pak1     | Serine/threonine-protein kinase PAK 1                                                                                            | SVIEPLPVTPTTR,NTSTMIGAGSKDTGT LNHGSKPLPPNPEEK                                                                                                                                                             |                                                                                                                                                                                                                                                                                                                    |                                                                                                                                                                                                     |
| IPI00120790.2 | Q9DCE5 | Pak1ip1  | p21-activated protein kinase-interacting protein 1                                                                               |                                                                                                                                                                                                           | YIVVVQNK,LTCLTVWLDR                                                                                                                                                                                                                                                                                                |                                                                                                                                                                                                     |
| IPI00229884.1 | Q8CIN4 | Pak2     | Serine/threonine-protein kinase PAK 2                                                                                            | SVIDPIAPVGDNSVDSGAK,DPLSAN HSLKPLPSVPEEK,ECLQALEFLHANQ VIHR                                                                                                                                               |                                                                                                                                                                                                                                                                                                                    |                                                                                                                                                                                                     |
| IPI00858000.1 | Q9ET54 | Palld    | Isoform 1 of Palladin                                                                                                            |                                                                                                                                                                                                           | EDLLNNGQPR,FGPSQTPAAFLSAL LPSQPPPVAVNALGLPK                                                                                                                                                                                                                                                                        |                                                                                                                                                                                                     |
| IPI00117264.1 | Q99LX0 | Park7    | Protein DJ-1                                                                                                                     | VTHPLAK,GPGTSFEFALAIVEALVGK ,TQGPYDVVVLPGGNLGAQNLSESPM VK,ALVILAK,VTVAGLAGKDPVQC SRD VMICPDTSLERAK,GPGTSFEFALAIVE ALVGKDMANQVK,KGLIAAICAGPTALL AHEVGFQCK,DGLILTSR,VTVAGLAGK ,GAEEMETVIPVDVMR              | GPGTSFEFALAIVEALVGK,VTVA GLAGKDPVQC SR,DGLILTSR                                                                                                                                                                                                                                                                    | GPGTSFEFALAIVEALVGK,TQGPY DVVVLPGGNLGAQNLSESPMVK,G LIAAICAGPTALLAHEVGFQCK,VTV AGLAGK                                                                                                                |
| IPI00139168.2 | Q3TF18 | Parp1    | Putative uncharacterized protein                                                                                                 | PVQELVGMIFDVESMK,LPKPVQELVG MIFDVESMK,NTHATTHNAYDLEVIDIF K,TLGDFLAEYAK,ELLIFNQQVPSGE SAILDR,TTNFAGILSQGLR                                                                                                 | AEPGEVVAPK,KGDEVDGTDEVA K,NTHATTHNAYDLEVIDIFK,KPPL LNNADSVQAK,LQLEDDKESR,A QNELIWNKDELKK,VEMLDNLLDI EVAYSLLR,TTNFAGILSQGLR,AS LCISTK,VVDRDSEEAIEVIR,VVCE DFLQDVSASTK,VVDRDSEEAIEVI RK,GGAAVDPDSGLEHSAHVLEK, ALVEYEIDLQK,TLGDFLAEYAK,S LQELLSAHSLSWGAIEVK,ELLIF NQQQVPSGESAILDR,PVQELVG MIFDVESMKK,GGKVSATLGLVD IVR | SDAYYCTGDVTAWTK,VVCEDFLQ DVSASTK,KMVDPEK,WYHPTCFVK, VGTVIGSNK,QIQAAYSILSEVQQAV SQGSSESQILDLSNR,RQIQAAYSIL SEVQQAVSQGSSESQILDLSNR,LL WHGSR,TLGDFLAEYAK,LPKPVQE LVGMIFDVESMKK,TTNFAGILSQGL R,ASLCISTK |

|               |          |        |                                                   |                                                                                                               |                                                                                                                                                                                                                                                                                                                            |
|---------------|----------|--------|---------------------------------------------------|---------------------------------------------------------------------------------------------------------------|----------------------------------------------------------------------------------------------------------------------------------------------------------------------------------------------------------------------------------------------------------------------------------------------------------------------------|
| IPI00112473.2 | P11103   | Parp1  | Isoform Long of Poly [ADP-ribose] polymerase 1    | VFSATLGLVDIVK,PVQELVGMIFDVDS<br>MK,NTHATTHNAYDLEVIDIFK,ELLIFN<br>QQQVPSGESAILDR,TTNFAGILSQGL<br>R             | VVDRDSEEAEEVIR,VVDRDSEEA<br>VIRK,GGAAVDPDPSGLEHSAHVLE<br>K,VFSATLGLVDIVK,ALVEYEIDLQ<br>K,NTHATTHNAYDLEVIDIFK,KPPL<br>LNNADSVQAK,ELLIFNQQQVPSG<br>ESAILDR,LQLEDDKESR,VEMLD<br>NLLDIEVAYSLLR,AQNELIWNIKD<br>ELKK,TTNFAGILSQGLR                                                                                               |
| IPI00551075.4 | Q2EMV9   | Parp14 | Isoform 1 of Poly [ADP-ribose] polymerase 14      |                                                                                                               | DFAVAVVTFQK,KFIVDCISHR                                                                                                                                                                                                                                                                                                     |
| IPI00354432.4 | Q925B0   | Pawr   | Isoform 1 of PRKC apoptosis WT1 regulator protein | KREDAITQQNTIQNEAATLPDPGTSYL<br>PQDPSR,SGGSTTTDFLEEWK,LKEEI<br>DLLNRDLDDMEDENEQLK,LKEEIDLL<br>NR,DLDDMEDENEQLK |                                                                                                                                                                                                                                                                                                                            |
| IPI00461676.5 |          | Pbrm1  | polybromo 1                                       | INMSGYILFSSEMRAVIK,RDDIEDGDS<br>MISSATSDTGSAK,YEEGESEAESITSF<br>MDVSNPFHQLYDTR                                |                                                                                                                                                                                                                                                                                                                            |
| IPI00128904.1 | P60335   | Pcbp1  | Poly(rC)-binding protein 1                        | QVTITGSAASISLAQYLINAR,IITLTGPT<br>NAIFK,ESTGAQVQVAGDMLPNSTER,<br>LEEDINSSMTNSTAASRPPVTLR                      | AITIAGVPQSVTECVK,GYWASLD LEEDINSSMTNSTAASR,AITIAGVP<br>ASTQTTHELTIPNNLIGCIIGR,IITL QSVTECVK,QGANINEIR,GYWASLD<br>TGPTNAIFK,EVGSIIIGK,INISEGN ASTQTTHELTIPNNLIGCIIGR,IITLTG<br>CPER,AFAMIIDK,LVVPATQCGSLI PTNAIFK,EVGSIIIGK,INISEGNCPER<br>GK,MDAGVTESGLNVTLTIRLLMH ,LVVPATQCGSLIGK,IANPVEGSSG<br>GKEVGSIIIGK,IANPVEGSSGR R |
| IPI00127707.1 | Q61990   | Pcbp2  | Isoform 1 of Poly(rC)-binding protein 2           | QVTITGSAASISLAQYLINVR,ESTGAQ<br>VQVAGDMLPNSTER                                                                | LVVPASQCGSLIGK,AITIAGIPQSII GVTIPYRPK,LVVPASQCGSLIGK,AI<br>ECVK,KGESVKK,EVGSIIIGK,INIS TIAGIPQSIIIECVK,EVGSIIIGK,IITLAG<br>EGNCPER,IITLAGPTNAIFK,AFAM PTNAIFK,INISEGNCPER,IANPVEG<br>IIDK,IANPVEGSTDR STDR                                                                                                                 |
| IPI00356667.4 | Q5HZI5   | Pcdh17 | Protocadherin 17                                  |                                                                                                               | VNGEQHHWDMSLPLIVTLSTISIILLA<br>AMITIAVK,MYLSICCCFLWAPALTL<br>K                                                                                                                                                                                                                                                             |
| IPI00223060.1 |          | Pck2   | mitochondrial phosphoenolpyruvate carboxykinase 2 |                                                                                                               | EGALDLSGLSAVDTSQLFSIPK,E<br>VLAELEALEGR,LGTPVLQALGDG<br>DFIK                                                                                                                                                                                                                                                               |
| IPI00752192.1 | Q9QYX7-4 | Pclo   | Isoform 4 of Protein piccolo                      |                                                                                                               | YLEMGINRR,APVADVEPK,QELDSS<br>QAPQQPGKPPDPGR,DLSGIHTTDA<br>ITSLSALHQSQPMMPR,IIEDEEKVVDL<br>TAGRR,QPTLHGPTPATAPQPPVAE<br>ALPKPAPPK                                                                                                                                                                                          |
| IPI00113870.1 | P17918   | Pcna   | Proliferating cell nuclear antigen                |                                                                                                               | KVLEALK,YLNFFTK,FSASGELGN<br>GNIK,LMDLDVEQLGIPEQEYSCVI<br>K,LIQGSILK,DLSHIGDAVVISCAK, KVLEALK,YLNFFTK,FSASGELGNG<br>ATPLSPTVTLSMSADVPLVVEYK, NIK,IADMGHLK,LMDLDVEQLGIPEQ<br>AEDNADTLALVFEAPNQEK,NLA EYSCVIK,YYLAPK,ATPLSPTVTLISM<br>MGVNLTSMSK,LSQTSNVDKEEE SADVPLVVEYK<br>AVTIEMNEPVHLTFALR,MPSGEF<br>AR                  |

|               |          |             |                                                                                |                                                                                                                                                                                                                                                                                                                                                                                                                                                                                                                                                          |
|---------------|----------|-------------|--------------------------------------------------------------------------------|----------------------------------------------------------------------------------------------------------------------------------------------------------------------------------------------------------------------------------------------------------------------------------------------------------------------------------------------------------------------------------------------------------------------------------------------------------------------------------------------------------------------------------------------------------|
| IPI00457623.3 | Pcnt     | pericentrin |                                                                                | AQHESELEHLR,HEAEVSLK,ELEIQ<br>R,LASMFLELR,QFMDDQAAER,CEA<br>LLAQEKGQSELQKSLEAER                                                                                                                                                                                                                                                                                                                                                                                                                                                                          |
| IPI00115490.1 | P49586   | Pcyt1a      | Choline-phosphate cytidyltransferase A                                         | IDFVAHDDIPYSSAGSDDVYK,EFIGSF<br>LEMFGPEGALK                                                                                                                                                                                                                                                                                                                                                                                                                                                                                                              |
| IPI00551454.3 | Q6NS46   | Pdcd11      | Protein RRP5 homolog                                                           | IEDPEINSIEDVK,TTEPGVTGLILAVEG<br>PASK,GLTVSFPFGK,IPLLLTSLSK,LN<br>EQVAQEEPLEDLLR,ILDDVPVGTSPPT<br>TLK<br>TTEPGVTGLILAVEGPASK,VLALS<br>LR,FAQLEFQLGDVER,ISYQQLG<br>AVLDDVPVQGFQFK,FQVGQAIEAT<br>VWDPDVP, VFLHLADIYTK,KPAL<br>VSTVEGGQDPK,NLIELSLLPSDT<br>GRPDVFSAPPEPK,FVTTTSEHFV<br>EGQTVVAK,IIDYSQMDELALLSLR<br>LVLSSPNSSILWQYMAFHLQATEIE<br>K,CVLPSSVIIGLGPSVLGLAK,HEL<br>S<br>TQHIDPETVVFYTGQVVK,GLVDFM<br>HLEPK,TTEPGVTGLILAVEGPASK,<br>ACILCVHPR,GTVLAIKPFGILVK,IPL<br>LLTSLSK,HILLCR                                                               |
| IPI00885252.1 |          | Pdcd5       | 22 kDa protein                                                                 | VSEQGLIEIEK,AVENYLIQMAR,LSNL<br>ALVKPEK,NSILAQVLDQSAR                                                                                                                                                                                                                                                                                                                                                                                                                                                                                                    |
| IPI00337893.2 | P35486   | Pdha1       | Pyruvate dehydrogenase E1 component subunit alpha, somatic form, mitochondrial | MVNSNLASVEELKEIDVEVR,GPILMEL<br>QTYR<br>EIDVEVR,AILAEITGR,GPILMELQ<br>TYR<br>NFYGGNGIVGAQVPLGAGIALACK,<br>RGDFIPGLR,LEEGPPVTTVLR                                                                                                                                                                                                                                                                                                                                                                                                                         |
| IPI00132042.1 | Q9D051   | Pdha1       | Pyruvate dehydrogenase E1 component subunit beta, mitochondrial                | DIIFAVK,VFLLGEEVAQYDGAYK                                                                                                                                                                                                                                                                                                                                                                                                                                                                                                                                 |
| IPI00230108.6 | P27773   | Pdia3       | Protein disulfide-isomerase A3                                                 | LAPEYEAATR,TFSHSDFGLESTT<br>GEVPVVAIR,MDATANDVPSPEYVK,T<br>ADGIVSHLK,KTFSHLSDFGLESTTGE<br>VPVVAIR,GFPTIYFSPANK,VVVAENF<br>DDIVNEEDK,ELNDFISYLQR,ALEQFL<br>QEYFDGNLKR,EYDDNGEGITIFR,DGE<br>EAGAYDGPR,ALEQFLQEYFDGNLKR,D<br>LFDSDGHSEFLK,DLLTAYYDVDYEK,EY<br>DDNGEGITIFRPLHLANK,SEPIPESNE<br>GPVK,DASVVGFFR,FISDKDASVVGFF<br>R<br>ALEQFLQEYFDGNLKR,TFSHSDF<br>FGLESTTGEVPVVAIR,DLLTAYY<br>DVDYEK,FAHTNIESLVK,LSKDPN<br>IVIAK<br>PLHLANK,LNFAVASR,LAPEYEA<br>ATR,TFSHSDFGLESTTGEVPVVAI<br>R,GFPTIYFSPANK,ELNDFISYLQR,<br>FAHTNIESLVK,FLDAGHK,YGVSGY<br>PTLK |
| IPI00271951.5 | Q3TT79   | Pdia4       | protein disulfide isomerase A4                                                 | LVLTHPEK,VDATEQTDLAK,FIDE<br>HATKR,KGQAVDYDGSR<br>FHHTFSPEIAK,HALPLVGHR,FDVS<br>GYPTIK                                                                                                                                                                                                                                                                                                                                                                                                                                                                   |
| IPI00122362.1 | Q921X9   | Pdia5       | Protein disulfide-isomerase A5                                                 | KHTLVMFYAPWCPHCK,NNVLVLYSE<br>SEVAEAESHLK                                                                                                                                                                                                                                                                                                                                                                                                                                                                                                                |
| IPI00222496.3 | Q3TML0   | Pdia6       | Putative uncharacterized protein                                               | GSTAPVGGGSFPTITPR,GSFSEQGIN<br>EFLR,HQSLGGQYGVQGFPTIK,DVVE<br>LTDDTFDK,NLEPEWAAAATEVK,TGE<br>AIVDAALSALR,NSYLEVLLK<br>ALDLFSDNAPPELLEIINEDIAK,N<br>SYLEVLLK<br>GSTAPVGGGSFPTITPR,GSFSEQ<br>INEFLR,HQSLGGQYGVQGFPTIK,N<br>LEPEWAAAATEVK,ALDLFSDNAP<br>PELLEIINEDIAK,TGEAIVDAALSALR                                                                                                                                                                                                                                                                        |
| IPI00309768.7 | O70400   | Pdlim1      | PDZ and LIM domain protein 1                                                   | IWSPLVTEEGK,DFEQPLAISR,QSTSF<br>LVLQEILESDGK,VITNQNSPTGLYSS<br>ENISNFNNAVESK<br>AAIANLCIGDLITAIIDGEDTSSMTHLE<br>AQNK,PVVQPHPSGSLIIDK,VAASV<br>GNAQK                                                                                                                                                                                                                                                                                                                                                                                                      |
| IPI00845638.1 | Q4VA53-3 | Pds5b       | Isoform 3 of Sister chromatid cohesion protein PDS5 homolog B                  | SLVATFIVK,SLDPSNLEHLITPLVT<br>IGHIALLAPDQFAAPLK,IAPVHIDT<br>ESISALIK                                                                                                                                                                                                                                                                                                                                                                                                                                                                                     |

|               |        |        |                                                        |                                                                                                           |                                                                                                                                                                                                                                                                                                                                                                                                                                      |
|---------------|--------|--------|--------------------------------------------------------|-----------------------------------------------------------------------------------------------------------|--------------------------------------------------------------------------------------------------------------------------------------------------------------------------------------------------------------------------------------------------------------------------------------------------------------------------------------------------------------------------------------------------------------------------------------|
| IPI00112676.1 | Q9CZG9 | Pdzd11 | PDZ domain-containing protein 11                       | AGLQEGDQVLAVNDVDFQDIEHSK,IP<br>YDDYPVVFLPAYENPPAWIPPHER,VY<br>HPDYNNELTQFLPR                              |                                                                                                                                                                                                                                                                                                                                                                                                                                      |
| IPI00121013.1 | Q62048 | Pea15a | Isoform 1 of Astrocytic phosphoprotein<br>PEA-15       | DNLSYIEHIFEISR,SEEITGSAWFSFL<br>ESHNK,LDKDNLSYIEHIFEISR,RPDLL<br>TMVVDYR                                  |                                                                                                                                                                                                                                                                                                                                                                                                                                      |
| IPI00137730.7 | P70296 | Pebp1  | Phosphatidylethanolamine-binding<br>protein 1          | VDYAGVTVDELGK,VLTPQTVMNRPS<br>SISWDGLDPGK,GNDISSGTVLSDYVG<br>SGPPSGTGLHR,LYTLVLTDPDAPSR,P<br>SSISWDGLDPGK | VDYAGVTVDELGK,GNDISSGTVL<br>SDYVGSPPSGTGLHR,LYTLVLT<br>DPDAPSR,YVWLVEQEQLPLSCD<br>EPILSNK<br>VDYAGVTVDELGK,LYEQLSGK,GN<br>DISSGTVLSDYVGSPPSGTGLHR,<br>PSSISWDGLDPGK                                                                                                                                                                                                                                                                  |
| IPI00321597.6 | Q9DBD5 | Pelp1  | Proline-, glutamic acid- and leucine-rich<br>protein 1 |                                                                                                           | LLPQVLNAWSTGR,LLLLESISGLL<br>QPR,LHGTTAGGAQNLSALGALVN<br>LSNAHLGSIK,LPSLGAGFSQGLK,<br>LLLALLLAPSPR,GSSDGGLQSGK<br>PSAPK<br>LLPQVLNAWSTGR,TASPVAPVHPP<br>IQWAPHLPLMCLLR,LHGTTAGGAQ<br>NLSALGALVNLNAHLGSIK,LPSLG<br>AGFSQGLK,NANSDVCAALR,TILM<br>CGPLIK                                                                                                                                                                                |
| IPI00620167.2 | Q5SQ20 | Pes1   | Pescadillo homolog 1, containing BRCT<br>domain        |                                                                                                           | RLTVEFLHYVITAR,LAALSASLAR,<br>EALAFIIR<br>LQLSLPDFR,LLLPAVEYFPGMQLPP<br>HLSPFVSEK,LEGQAQAEK,FLLHE<br>PIVNK                                                                                                                                                                                                                                                                                                                           |
| IPI00461329.3 | Q9D0K1 | Pex13  | Peroxisomal membrane protein PEX13                     |                                                                                                           | FVQQAEESSR,VPPPILPRPSQQTG<br>SNNVNTFR                                                                                                                                                                                                                                                                                                                                                                                                |
| IPI00265406.3 | Q5SUR0 | Pfas   | Phosphoribosylformylglycinamide<br>synthase            | LSFTDHPTAEMEAIISLAALHDR,WATV<br>RVEPGPALMLR,CPACFVGTITGDKR                                                | CSGNWMWAAK,GVAFVGGFSYA<br>DVLGSAK,TGQGDAPLTPPTPVD<br>LLYVPLSPGQHR,VEPGPALMLR,T<br>GQGDAPLTPPTPVDLDDLWVLGK,K<br>AMVAVMAALGVAVDGGK,LAVSE<br>LAHSLFESIMSTQASSNPNVVK,AF<br>ALTNLVFALVTDLR,LGGTALAQC<br>FSQLGEHPPDLDPENLVR<br>LNFSTPASTNIVSVCQAAGLR,TGPS<br>YYLPPTFPVASVPCKPGGPVPR,GH<br>LLYVPLSPGQHR,VEPGPALMLR,T<br>GQGDAPLTPPTPVDLDDLWVLGK,K<br>LAHSLFESIMSTQASSNPNVVK,AF<br>HITQGLLK,KPPVLQPLALPELSVR,<br>LGGTALAQCFSQLGEHPPDLDPENLVR |
| IPI00132485.2 | Q9CWM4 | Pfdn1  | Prefoldin subunit 1                                    | LADIQIEQLNR,HAHLTDTEIMTLVDET<br>NMYEGVGR,AFTLQAK,KAFTELQAK,<br>VIDTQQK                                    |                                                                                                                                                                                                                                                                                                                                                                                                                                      |
| IPI00119545.2 | O70591 | Pfdn2  | Prefoldin subunit 2                                    | LMGEDEKPAK,AAELEMELNEHSLVI<br>DTLK,GAVSAEQVIAGFNR,IETLSQQL<br>QAK                                         | AAELEMELNEHSLVIDTLK,IETLS<br>QQLQAK<br>GAVSAEQVIAGFNR,IETLSQQLQA<br>K                                                                                                                                                                                                                                                                                                                                                                |
| IPI00378557.3 | Q3UWL8 | Pfdn4  | prefoldin 4 isoform 1                                  | FGSNINLEADES,AAAEDVNVTFEDQQ<br>K,MAATMKKAAAEDVNVTFEDQQK,TL<br>QEEIDALESR                                  |                                                                                                                                                                                                                                                                                                                                                                                                                                      |
| IPI00554862.2 | P12382 | Pfkl   | 6-phosphofructokinase, liver type                      |                                                                                                           | AIGVLTSGGDAQGMNAAVR,LNIIII<br>AEGAIDR,VFANAPDSACVIGLR,T<br>NVLGHLQGGAPTPFDR,HGKPI<br>SSSYVK,TFVLEVMGR,NEWGSL<br>EELVK,TGISEGHTVYIVHDGFEG<br>LAK,AAAAYNLLQHGITNLCVIGG<br>GSLTGANIFR,GVQVEVGHWDVA<br>GWLGR,IMEVIDAITTAQSHQR<br>VFANAPDSACVIGLR,TNVLGHLQ<br>GGAPTPFDR,HGKPISSSYVK,VT<br>GHVQR,AAAAYNLLQHGITNLCVIG<br>DGSLTGANIFR,VVAFSPVTELK                                                                                            |

|               |        |         |                                                   |                                                                 |                                                                                                                                                                                                                                                                                                                                                                                                                    |
|---------------|--------|---------|---------------------------------------------------|-----------------------------------------------------------------|--------------------------------------------------------------------------------------------------------------------------------------------------------------------------------------------------------------------------------------------------------------------------------------------------------------------------------------------------------------------------------------------------------------------|
| IPI00124444.1 | Q9WUA3 | Pfkp    | Isoform 1 of 6-phosphofructokinase type C         |                                                                 | IIEVVDAIMTTAQSHQR,TFVLEVMGR,LNIIIVSEGAIDMQNKPITSEK                                                                                                                                                                                                                                                                                                                                                                 |
| IPI00224740.6 | P62962 | Pfn1    | Profilin-1                                        | TFVSITPAEVGVLVGK,TLVLLMGK,SSFFVNGLTLGGQK,DSLLQDGEFTMDLR         | DSPSVWAAVPGK,EGVHGGLINKK,TFVSITPAEVGVLVGK,SSFFVNGLTLGGQK,TLVLLMGK,EGVHGGLINK,STGGAPTFFNVTVTMTAK,DSLLQDGEFTMDLR                                                                                                                                                                                                                                                                                                     |
| IPI00457898.3 | Q9DBJ1 | Pgam1   | Phosphoglycerate mutase 1                         | HLEGLSEEAIMELNLTGPIVYELDK,FSGWYDADLSPAGHEEAK,NLKPIKPMQFLGDEETVR | YADLTEDQLPSCESLK,VLIAAHGNSLR,YADLTEDQLPSCESLKDTIAR,DAGYEFDICFTSVQK,FSGWYDADLSPAGHEEAK,RVLIAAHGN SLR,NLKPIKPMQFLGDEETVR,FSGWYDADLSPAGHEEAK,HLEGLSEEAIMELNLTGPIVYELDK,HGESAWNLENR,HYGGLTGLNK,TLWTVLDAIDQMWLPVVR,AMEAVAAQ GK,ALPFWNEEIVPQIK                                                                                                                                                                           |
| IPI00466919.7 | Q9DCD0 | Pgd     | 6-phosphogluconate dehydrogenase, decarboxylating |                                                                 | LVPLLDTGDIIDGGNSEYR,NPELQNLDDFFK,AIFQAIAAK                                                                                                                                                                                                                                                                                                                                                                         |
| IPI00555069.3 | P09411 | Pgk1    | Phosphoglycerate kinase 1                         | VLPGVDALSNV,DCVGPEVENACANPAAGTVILLENLR,VSHVSTGGGASLELLE GK      | NNQITNNQR,IQLINMLDKVNEMIIGGGMAFTFLK,VDFNVPMK,FCLDNGAK,YSLEPVAELK,IQLINMLDK,FHVEEEGK,FHVEEEGKGCITIIGGGDTATCCA,ITLPVDFVTADKFDENAK,VLPGVDALSNV,VLNNMEIGTSLYDEEGAK,LGDVYVNDAFGTAHR,QIWWNGPVGVFEWEAFAR,SLMDEVVK,AHSSMVG VNL P Q K , D C V G P E V E N A C A N P A A G T V I L L E N L R , A L E S P E R P F L A I L G A K , V S H V S T G G G A S L E L L E G K , S V V L M S H L G R P D G V P M P D K , Y A E A V G R |
| IPI00132080.1 | Q9CQ60 | Pgls    | 6-phosphogluconolactonase                         |                                                                 | LPIPDSQVLTINPALPVEDAEDYAR,VTLTLPVLNAAQSIIFVATGEGK                                                                                                                                                                                                                                                                                                                                                                  |
| IPI00830261.1 | B1AVP0 | Phactr2 | Phosphatase and actin regulator 2                 |                                                                 | AGLVGTR, LGNRPSK, TENTEIHSEPTAAPTLPPTAPPK                                                                                                                                                                                                                                                                                                                                                                          |

|               |        |         |                                                                                               |                                                                                 |                                                                                                                                                                                                                                                  |                                                                                                                                                                 |
|---------------|--------|---------|-----------------------------------------------------------------------------------------------|---------------------------------------------------------------------------------|--------------------------------------------------------------------------------------------------------------------------------------------------------------------------------------------------------------------------------------------------|-----------------------------------------------------------------------------------------------------------------------------------------------------------------|
| IPI00133440.1 | P67778 | Phb     | Prohibitin                                                                                    |                                                                                 | AAIISAEGDSK,FGLALAVAGGVV<br>NSALYNVDAGHR,EFTEAVEAK,A<br>AELIANSLATAGDGLIELR,IYTSIG<br>EDYDER,ILFRPVASQLPR,DLQN<br>VNITLR,AATFGLILDDVSLTHLTF<br>GK,KLEAAEDIAYQLSR,GVQDIVV<br>GEGTHFLIPWVQKPIIFDCR,PVAS<br>QLPR,VFESIGK,FDAGELITQR,VL<br>PSITTEILK | NITYLPAGQSVLLQLPQ,AAIISAEGD<br>SK,FGLALAVAGGVVNSALYNVDAG<br>HR,DLQNVNITLR,PVASQLPR,GVQ<br>DIVVGEGETHFLIPWVQKPIIFDCR,FD<br>AGELITQR,ILFRPVASQLPR,VLPSIT<br>TEILK |
| IPI00321718.4 | O35129 | Phb2    | Prohibitin-2                                                                                  | IGGVQQDTILAEGLHFR,VLSRPNAQEL<br>PSMYQR,AKDFSLILDDVAITELSF<br>YLTADNLVNLQDESFTTR | IPWFQYPIIDIR,LLL GAGAVAYG<br>VR,VLPSIVNEVLK,LGLDYEER,DF<br>SLILDDVAITELSF SR,DLQMVNISL<br>R,FNASQLITQR,AQVSLIR,IGGV<br>QQDTILAEGLHFR,IVQAEGEAEA<br>AK,EYTAAVEAK,IYLTADNLVNL<br>QDESFTTR                                                          | VLPSIVNEVLK,VLPSIVNEVLSVVA<br>KFNASQLITQR,FNASQLITQR,AQV<br>SLLIR,IGGVQQDTILAEGLHFR,LAE<br>GLHFR,IVQAEGEAEA AK, EYTA<br>AVEAK                                   |
| IPI00225961.5 | Q61753 | Phgdh   | D-3-phosphoglycerate dehydrogenase                                                            |                                                                                 | ALVDHENVISCPHLGASTK,TLGIL<br>GLGR,NAGTCLSPAIVIGLLR,GGI<br>VDEGALLR,VTADVINAEEK,GTIQ<br>VVTQGTSLK,AGTGVDNVDLEAA<br>TR                                                                                                                             | TLGILGLGR,NAGTCLSPAIVIGLLR,<br>KGILVMNTPNGNSLSAAELTCGMIM<br>CLAR,GTIQVVTQGTSLK,AGTGVDN<br>VDLEAATR                                                              |
| IPI00264501.8 | Q7M6Y3 | Picalm  | Isoform 1 of Phosphatidylinositol-binding clathrin assembly protein                           |                                                                                 | ATTLSNAVSSLASTGLSLTK,GDIP<br>DLSQAPSSLLDALEQHLASLEGK                                                                                                                                                                                             | ITAAQHSVTGSAVSK,ATTLNAVSS<br>LASTGLSLTK,LVSDDDLSSLANLVG<br>NLGIGNGTTK,GDIPDLSQAPSSLLD<br>ALEQHLASLEGK                                                           |
| IPI00115695.1 | O70167 | Pik3c2g | Isoform 1 of Phosphatidylinositol-4-phosphate 3-kinase C2 domain-containing gamma polypeptide |                                                                                 | RPLQSIR,DLIAEILLCANEPSPK                                                                                                                                                                                                                         |                                                                                                                                                                 |
| IPI00336318.1 | Q80X14 | Pip4k2b | Phosphatidylinositol-5-phosphate 4-kinase type-2 beta                                         | FGIDDQDYQNSVTR,LTVDGVETYMV<br>TR                                                |                                                                                                                                                                                                                                                  |                                                                                                                                                                 |
| IPI00170126.4 | Q8K411 | Pitrm1  | Isoform 1 of Presequence protease, mitochondrial                                              |                                                                                 | IFSQHLQNK,IHGFTVNQVTPVPE<br>LFLTAVK,LLPDHTYSVSVGGDPL<br>CIPELTWEQLK,AFSSLNLTLPEDL<br>RPIVPLFCSVLTK                                                                                                                                               | IFSQHLQNK,HQDASCLPALK,LLPD<br>HTYSVSVGGDPLCIPELTWEQLK                                                                                                           |

|               |          |         |                                                                      |                                                                                                                                                                                                                                                                                                                                                                               |                                                                                                                                                                                                                                                                                                                                                                                                                                                                                                                                                                                                                     |                                                                                                                                                                                                                                                                                                                                                                                                 |
|---------------|----------|---------|----------------------------------------------------------------------|-------------------------------------------------------------------------------------------------------------------------------------------------------------------------------------------------------------------------------------------------------------------------------------------------------------------------------------------------------------------------------|---------------------------------------------------------------------------------------------------------------------------------------------------------------------------------------------------------------------------------------------------------------------------------------------------------------------------------------------------------------------------------------------------------------------------------------------------------------------------------------------------------------------------------------------------------------------------------------------------------------------|-------------------------------------------------------------------------------------------------------------------------------------------------------------------------------------------------------------------------------------------------------------------------------------------------------------------------------------------------------------------------------------------------|
| IPI00407130.4 | P52480   | Pkm2    | Isoform M2 of Pyruvate kinase isozymes M1/M2                         | RFDEILEASDGIMVAR,FDEILEASDGI<br>MVAR,EATESFASDPILYRPAVALDT<br>K,GADFLVTEVENGGSLGSK,FGVEQD<br>VDMVFASFIR,LDIDSAPITAR,LAPITSD<br>PTEAAAVGAVEASF,LNFSHGTHEYH<br>AETIK,KGDVVIVLTGWRPGSGFTNTM<br>R,IYVDDGLISLQVK,PVAVALDTK,KGV<br>NLPGAAVDLPAVSEK,SGGTAEVELK,<br>EAEAAIYHLQLFEELR,SGGTAEVELK<br>,GVNLPGAAVDLPAVSEK,EATESFAS<br>DPILYR,FGVEQDVMVFASFIRK,DAV<br>LNAWAEDVDR,GDLGIEIPA | RFDEILEASDGIMVAR,EATESFA<br>SDPILYRPAVALDTK,AADVHEV<br>R,FGVEQDVMVFASFIR,LNFSH<br>GTHEYHAETIK,KAADVHEVR,PV<br>AVALDTK,APIIAVTR,SGGTAEVE<br>LK,EAEAAIYHLQLFEELR,KGDVVI<br>VLTGWR,VNLMAMDVGK,GDVI<br>TGWRPGSGFTNTMR,DAVLNAW<br>AEDVDR,GDYPLEAVR,AEGSDV<br>ANAVLDGADCIMLSGETAK,IENH<br>EGVR,ITLDNAYMEK,GADFLVTE<br>VENGGSLGSK,GIFPVLCK,EAEA<br>AIYHLQLFEELR,LDIDSAPITAR,<br>LAPITSDPTEAAAVGAVEASF,K<br>GDVVIVLTGWRPGSGFTNTMR,IY<br>VDDGLISLQVK,KGVNLPGAAVDL<br>PAVSEK,EKGADFLVTEVENGG<br>SLGSK,CCSGAIVLTK,NTGICTIGP<br>ASR,SGGTAEVELK,GVNLPGAA<br>VDLPAVSEK,EATESFASDPILYR,<br>MQHLIAR,AGKPVICATQMLESMI<br>K,GDLGIEIPA | PVICATQMLESNIK,EATESFASDPIL<br>YRPAVALDTK,ITLDNAYMEK,GAD<br>FLVTEVENGGSLGSK,GIFPVLCK,L<br>APITSDPTEAAAVGAVEASF,LNFS<br>HGTHEYHAETIK,LDIDSAPITAR,IYV<br>DDGLISLQVK,KGVNLPGAAVDLPA<br>VSEK,PVAVALDTK,APIIAVTR,SGS<br>TAEVELK,NTGICTIGPASR,VNLM<br>AMDVGK,GVNLPGAAVDLPAVSEK,EA<br>TESFASDPILYR,MQHLIAR,DAVLNA<br>WAEDVDR,GDYPLEAVR,GDLGIEI<br>PAEK,AGKPVICATQMLESNIK,AEG<br>SDVANAVLDGADCIMLSGETAK |
| IPI00626385.4 |          | Plec1   | plectin isoform 12alpha                                              |                                                                                                                                                                                                                                                                                                                                                                               | AALAHSEIATTQAASK,GFFDPN<br>THENLTYLQLLER,LTVDEAVR,TE<br>VVETTQVYTEEETRR,IVITIVEEV<br>ETR,LAEEVALEK,LSVAAQEA<br>R,VTLVQTLIQR,TLQEEHVTVAQ<br>LR                                                                                                                                                                                                                                                                                                                                                                                                                                                                       | SSIAGLLLKPTNEK,QVQVALETAQR<br>SAEVELQSK,LEEQAALHK,VLALPE<br>PSPAAPTLR,ATVSAPFGK,AIVQLK<br>PR,AQAEQAALK,KNLIDR,SLLAWQ<br>SLSR                                                                                                                                                                                                                                                                    |
| IPI00624550.4 | Q3UIL6-2 | Plekha7 | Isoform 2 of Pleckstrin homology domain-containing family A member 7 | EEAVLGSIPSPYVISPVAPEDR,GWE<br>EGFTEEGASFFIDHNQQTTFR,IINISY<br>ALASEASK,EQEFDLQLLER,DQLESVL<br>EVLHR,YSQPLPGDLGSWK,SPYLPA<br>EEDALFVDLPGGPR,NSLADLDSQLQE<br>QER                                                                                                                                                                                                                |                                                                                                                                                                                                                                                                                                                                                                                                                                                                                                                                                                                                                     |                                                                                                                                                                                                                                                                                                                                                                                                 |
| IPI00319270.2 | Q9DBG5   | Plin3   | Mannose-6-phosphate receptor-binding protein 1                       |                                                                                                                                                                                                                                                                                                                                                                               | TLTAAVSTAQPILSK,NHAYEHS<br>GK,TPQDAEKDPAKPEQVEAR                                                                                                                                                                                                                                                                                                                                                                                                                                                                                                                                                                    | TLTAAVSTAQPILSK,DPAKPEQVE<br>AR,DITQQLQSMCVALGASIQGLPS<br>HVR,VAGLPLISSTYGMVSAAYTSTK<br>,AQETLQQLTSVLGLMESVK                                                                                                                                                                                                                                                                                    |
| IPI00344681.2 | Q3V0K9   | Pls1    | Plastin-1                                                            | MVMTVFACLMGKGLNR,SISTSPLVLD<br>LIDAIAPNAVR                                                                                                                                                                                                                                                                                                                                    |                                                                                                                                                                                                                                                                                                                                                                                                                                                                                                                                                                                                                     |                                                                                                                                                                                                                                                                                                                                                                                                 |
| IPI00133709.5 | Q9D1G2   | Pmkv    | Isoform 1 of Phosphomevalonate kinase                                |                                                                                                                                                                                                                                                                                                                                                                               |                                                                                                                                                                                                                                                                                                                                                                                                                                                                                                                                                                                                                     | LGGNICALLR,RQADPGFFCRK                                                                                                                                                                                                                                                                                                                                                                          |
| IPI00785231.1 | Q3TUQ5   | Pnn     | pinin                                                                |                                                                                                                                                                                                                                                                                                                                                                               | LEVQAEER,FKQESTVATER                                                                                                                                                                                                                                                                                                                                                                                                                                                                                                                                                                                                |                                                                                                                                                                                                                                                                                                                                                                                                 |

|               |        |        |                                                               |                                                                                                                                                                                                   |                                                                                                                                |                                                                                   |
|---------------|--------|--------|---------------------------------------------------------------|---------------------------------------------------------------------------------------------------------------------------------------------------------------------------------------------------|--------------------------------------------------------------------------------------------------------------------------------|-----------------------------------------------------------------------------------|
| IPI00131909.1 | Q9CPS7 | Pno1   | RNA-binding protein PNO1                                      | LDDLFLSFETDVK,AFVLGFQVEDAL<br>ALIR,LDDLFLSFETDVKPLK,IFTPIVE<br>HLGLQIR,RPVFPPLSGDQLLTGK                                                                                                           | KEETRK,IFTPIVEHLGLQIR,KIPVPG<br>NR,TAICNLILGNPPSK,RPVFPPLSG<br>DQLLTGK                                                         |                                                                                   |
| IPI00315452.5 | P23492 | Pnp1   | Purine nucleoside phosphorylase                               |                                                                                                                                                                                                   | AAAQTLER,MLGADAVGMSTVPE<br>VIVAR,VFGFSLITNK,DHINLPGFC<br>GQNPLR                                                                | AAAQTLER,LVFGLLNGR,VFGFSLIT<br>NK,WLLQHTEYRPQVAVICGSLGG<br>LTAHLK,DHINLPGFCGQNPLR |
| IPI00135996.4 | Q8K4L4 | Pof1b  | Protein POF1B                                                 | YFGELLADLSR,IVIEK                                                                                                                                                                                 |                                                                                                                                |                                                                                   |
| IPI00321912.2 | Q8K202 | Polr1e | Isoform 1 of DNA-directed RNA<br>polymerase I subunit RPA49   | FTLYNSTDLVNPR,SIWFLDALIR                                                                                                                                                                          |                                                                                                                                |                                                                                   |
| IPI00136207.6 | P08775 | Polr2a | DNA-directed RNA polymerase II subunit<br>RPB1                |                                                                                                                                                                                                   | PSDLHLQTGYK,TPSLTVFLLGQS<br>AR,AHNNLEPTPGNTRL,LSGEA<br>FDWLLGEIESK,AKQDVIEVIEK,TA<br>ETGYIQR,INISQVIAVVGQQNVEG<br>K,NSINQVVQLR |                                                                                   |
| IPI00268215.1 | Q9D7M8 | Polr2d | DNA-directed RNA polymerase II subunit<br>RPB4                | EFETAETLLNSEVHMLLEHRK,QQNES<br>AEDEQELSEVFMK,AGDVEEDASQLIF<br>PK,EFETAETLLNSEVHMLLEHR,KQQ<br>NESAQELSEVFMK,FEDEELQQIL<br>DDIQTK                                                                   |                                                                                                                                |                                                                                   |
| IPI00124284.3 | Q923G2 | Polr2h | DNA-directed RNA polymerases I, II, and<br>III subunit RPABC3 |                                                                                                                                                                                                   | LVIASLTLYEDGTLDDGEYNPTDD<br>RPSR,IEGDETSTEATR                                                                                  |                                                                                   |
| IPI00169797.1 | Q8K205 | Pop1   | Processing of 1, ribonuclease P/MRP<br>family                 | MRNQPSNVTLSSGFMAER,VHAQEAA<br>IIASMPGAQETDPR                                                                                                                                                      |                                                                                                                                |                                                                                   |
| IPI00117218.3 | P20263 | Pou5f1 | POU domain, class 5, transcription factor<br>1                |                                                                                                                                                                                                   |                                                                                                                                | CPKPSLQQITHIANQLGLEK,LRPLL<br>EK,ITLGYTQADVGLTLGVLFVK,PSL<br>QQITHIANQLGLEK       |
| IPI00110684.1 | Q9D819 | Ppa1   | Inorganic pyrophosphatase                                     | VKVLGILAMIDEGETDWK,GQYISPFHD<br>VPIYADKDVHFMVVEVPR,GQYISPFH<br>DVPIYADK,VPDGGKPENEFNAEFK,Y<br>KVPDGGKPENEFNAEFK,LKPGYLEA<br>TVDWFR,VLGILAMIDEGETDWK,GYIW<br>NYGAIPQTWEDPGHSDK,VIAINVDDP<br>DAANYK | AAPFTLEYR,GQYISPFHDVPIYAD<br>KDVHFMVVEVPR,LKPGYLEATV<br>DWFR,VLGILAMIDEGETDWK,VIA<br>INVDDPDAANYK                              | WFHQQK,GQYISPFHDVPIYADK,YV<br>ANLFPYK,STHDYWK,VIAINVDDP<br>AANYK                  |
| IPI00127050.1 | Q91VM9 | Ppa2   | Isoform 1 of Inorganic pyrophosphatase<br>2, mitochondrial    | MEIATEEPLNPIK,FKPGYLEATLNWFR<br>,ILGTLALIDQSETDWK                                                                                                                                                 |                                                                                                                                |                                                                                   |
| IPI00130510.1 | Q91YU8 | Ppan   | Suppressor of SWI4 1 homolog                                  | TEEELQAILAAK,LPGGPTLTFQISK,IQ<br>EGVGNLNVLFHSFVHK,NLESYAAQP<br>HSFVFTTR,QAVGEEPDEDLFPPTAAK                                                                                                        |                                                                                                                                | LMATMFQNLFP SINVHTVNLNTIK,R<br>PGGPLGK                                            |
| IPI00896602.1 | B2RXQ2 | Ppfia1 | Ppfia1 protein                                                | EATSVHDLNDKLENEIANK,ESPGQVG<br>VSETENSSQDALGLSK,EFNLLITGTD<br>R                                                                                                                                   |                                                                                                                                |                                                                                   |



|               |        |          |                                                                           |                                                                                                                                                                                                                                 |                                                                                                                             |                                                                                                                                                                    |
|---------------|--------|----------|---------------------------------------------------------------------------|---------------------------------------------------------------------------------------------------------------------------------------------------------------------------------------------------------------------------------|-----------------------------------------------------------------------------------------------------------------------------|--------------------------------------------------------------------------------------------------------------------------------------------------------------------|
| IPI00554989.3 | Q9CZK9 | Ppia     | Peptidyl-prolyl cis-trans isomerase                                       | EGMNIVEAMER,FEDENFILK,HVVFGK,SIYGEKFEDENFILK,MVNPTVFFDITADDEPLGR,SIYGEK,VKEGMNIVEAMER,TEWLDGK,ALSTGEK                                                                                                                           | HTGPGILSMANAGPNTNGSQFFICTAK,EGMNIVEAMER,FEDENFILK,ITISDCGQL,SIYGEKFEDENFILK,IIPGFMCQGGDFTR,VKEGMNIVEAMER,KITISDCGQL,TEWLDGK | HTGPGILSMANAGPNTNGSQFFICTAK,EGMNIVEAMER,FEDENFILK,IIPGFMCQGGDFTR,KITISDCGQL,TEWLDGK                                                                                |
| IPI00135686.2 | P24369 | Ppib     | Peptidyl-prolyl cis-trans isomerase B                                     | VVFGFLGK,DVIIVDSGK,HVVFGK,IEVEKPFIAIAKE,DTNGSQFFITTVK,DKPLKDVIIVDSGK,VYFDLQIGDESVGR,IEVEKPFIAIAK,TVDNFVALATGEK,FPDENFK,DFMIQGGDFTR                                                                                              | DKPLKDVIIVDSGK,VYFDLQIGDESVGR,TVDNFVALATGEK                                                                                 | IEVEKPFIAIAK,TVDNFVALATGEK                                                                                                                                         |
| IPI00130240.1 | P30412 | Ppic     | Peptidyl-prolyl cis-trans isomerase C                                     | HVVFGK,DGTGGMSIYGETFPDENFK,IVIGLFGNVVVK,FPDENFK                                                                                                                                                                                 |                                                                                                                             |                                                                                                                                                                    |
| IPI00132966.3 | Q9CR16 | Ppid     | 40 kDa peptidyl-prolyl cis-trans isomerase                                | EGLLSMANAGPNTNGSQFFITVPTPHLDGK,ILLISEDLK,FMIQGGDFSNQNGTGGESIYGEK,IVLELFADIVPK,KFMIQGGDFSNQNGTGGESIYGEK,VFFDVIDIGER,SIYGEK,LCVIAECGELKEGDDWGIFPK,ILLISEDLKNIGNTFFK,LQPIALS CVLNIGACK,DGSGDShPDFPEDADIDLKDVDK,DGSGDShPDFPEDADIDLK | HVVFGQVIK,ILLISEDLK,FEDENFHYK,IVLELFADIVPK,AIQAECLK,VFFDVIDIGGER,EYDQALADLKK,LQPIALS CVLNIGACK,TLENVEVNGEKP                 | HVVFGQVIK,AIQAECLK,GTGSTTGKPLHFK,LQPIALS CVLNIGACK                                                                                                                 |
| IPI00111343.1 | Q9QZH3 | Ppie     | Peptidyl-prolyl cis-trans isomerase E                                     | TLEENKEEEGPEPPKAEAEQEGETAK,HVVFGEVTEGLDVLRLVHAAFIPFGDITDIQIPLDYETEK,VLVYVGLAAEEVDDK                                                                                                                                             |                                                                                                                             |                                                                                                                                                                    |
| IPI00457532.2 | Q9D6L8 | Ppil3    | Isoform 1 of Peptidyl-prolyl cis-trans isomerase-like 3                   | VIDGLETLDELEK,VIDGLETLDELEKLPVNEK                                                                                                                                                                                               |                                                                                                                             |                                                                                                                                                                    |
| IPI00130185.1 | P62137 | Ppp1ca   | Serine/threonine-protein phosphatase PP1-alpha catalytic subunit          | GNHECASINRIYGFYDECK,EIFLSQPILLEAPLK,YPENFFLLR                                                                                                                                                                                   | GVSFTFGAEVVAK,AHQVVEDGYEFFAK,GNHECASINR,EIFLSQPILLEAPLK                                                                     | TFTDCFNCLPIAAIVDEK,ICGDIHQYYDLLR,GNHECASINR,IFCCHGGLSPDLQSMEQIR,EIFLSQPILLEAPLK,LNLDSIIGR                                                                          |
| IPI00330483.1 | Q80W00 | Ppp1r10  | Isoform 1 of Serine/threonine-protein phosphatase 1 regulatory subunit 10 | YKPLNTAPNTTKEIK,STGLELDTPSLVPVK,LPPVLANLMGSMGAGK,GILQELFLNK                                                                                                                                                                     |                                                                                                                             |                                                                                                                                                                    |
| IPI00623545.2 | Q62084 | Ppp1r14b | Protein phosphatase 1 regulatory subunit 14B                              | LNLEEWILEQLTR,VYFQSPPGAAGEGPGGADDDGPVR,VYFQSPPGAAGEGPGGADDDGPVRR                                                                                                                                                                |                                                                                                                             |                                                                                                                                                                    |
| IPI00112721.1 | Q9ERT9 | Ppp1r1a  | Protein phosphatase 1 regulatory subunit 1A                               | RPTPATLVLTSDQSSPEIDEDRIPNSLLK,RPTPATLVLTSDQSSPEIDEDR,TESSAHMLPLDSQGASLV                                                                                                                                                         |                                                                                                                             |                                                                                                                                                                    |
| IPI00129319.3 | Q3UM45 | Ppp1r7   | Protein phosphatase 1 regulatory subunit 7                                | IEGLQSLVNLRLVMLALPSVR,LQNLDALTNLTVLSVQSNR,ELYLSNNGIEVIEGLENNNK,LTMLDIASNR,AIENIDTLNLESLFLGK,GAEDPEEEHELAVDMETINLDR,ELDLYDNQIK,IENISNLHQLQMLELGSNR,HGGGGIVANLSEQSLK                                                              |                                                                                                                             | IEGLQSLVNLRLVMLALPSVR,LQNLDALTNLTVLSVQSNR,ELYLSNNGIEVIEGLENNNK,LTMLDIASNR,AIENIDTLNLESLFLGK,GAEDPEEEHELAVDMETINLDR,ELDLYDNQIK,IENISNLHQLQMLELGSNR,HGGGGIVANLSEQSLK |

|               |          |         |                                                                                      |                                                                                                                                                                                                            |                                                                                                                                                                                                                    |                                                                                                                                                                                                                                                                                                                 |
|---------------|----------|---------|--------------------------------------------------------------------------------------|------------------------------------------------------------------------------------------------------------------------------------------------------------------------------------------------------------|--------------------------------------------------------------------------------------------------------------------------------------------------------------------------------------------------------------------|-----------------------------------------------------------------------------------------------------------------------------------------------------------------------------------------------------------------------------------------------------------------------------------------------------------------|
| IPI00153750.1 | Q8R3G1   | Ppp1r8  | Nuclear inhibitor of protein phosphatase 1                                           | GLLGLPEEETELDNLTEFNTHANK,RIS<br>TLTIEEGNLDIQRPK,LEPHKPPQIPIDS<br>TVSFGASTR,ISTLTIEEGNLDIQR,VTF<br>SEDEIINPEDVDPVSVGR,MEGSGSLG<br>LEESGSR,VFLIDLNSTHGTFGLGHIR,IS<br>TLTIEEGNLDIQRPK,RVFLIDLNSTHGT<br>FLGHIR |                                                                                                                                                                                                                    |                                                                                                                                                                                                                                                                                                                 |
| IPI00120374.1 | P63330   | Ppp2ca  | Serine/threonine-protein phosphatase 2A catalytic subunit alpha isoform              | YSFLQFDPAPR,CPVTVCGDVHGQFH<br>DLMELFR                                                                                                                                                                      |                                                                                                                                                                                                                    |                                                                                                                                                                                                                                                                                                                 |
| IPI00310091.8 | Q76MZ3   | Ppp2r1a | Serine/threonine-protein phosphatase 2A 65 kDa regulatory subunit A alpha isoform    |                                                                                                                                                                                                            | LTQDQDVVDVK,LSTIALALGVER,V<br>LELDNVK,DNTIEHLLPLFLAQLKD<br>ECPEVR,SALASVIMGLSPILGK,IG<br>PILDNSTLQSEVKPILEK,ELVSDA<br>NQHVK,LNIISNLDCVNEVIGIR                                                                      | QLSQSLLPAIVELAEDAQ,VLELDNV<br>K,SALASVIMGLSPILGK,IGPILDNST<br>LQSEVKPILEK,ELVSDANQHVK,LNI<br>ISNLDCVNEVIGIR                                                                                                                                                                                                     |
| IPI00222306.5 | Q8BIX1   | Ppp2r1b | Putative uncharacterized protein                                                     |                                                                                                                                                                                                            | LSTIALALGVER,LNIISNLDCVNEV<br>IGIR,IALS DLIPAFQSLLR                                                                                                                                                                | QLSQSLLPAIVELAEDAQ,IGPILDTN<br>ALQGEVKPV LQK,LNIISNLDCVNEV<br>IGIR,ELVSDTNQHVK                                                                                                                                                                                                                                  |
| IPI00880817.1 |          | Ppp2r2d | Protein                                                                              | SFFSEIISISDVK,INLWHLEITDR                                                                                                                                                                                  |                                                                                                                                                                                                                    |                                                                                                                                                                                                                                                                                                                 |
| IPI00118723.3 | P58389   | Ppp2r4  | Serine/threonine-protein phosphatase 2A regulatory subunit B'                        |                                                                                                                                                                                                            |                                                                                                                                                                                                                    | FGSLLPIHPVTSG,QVAIVFK,LDQEA<br>ENLVATVVPHTLAAAVPEVAVYLK,<br>QPPPDSSSEETPPTTQNFIIPKK                                                                                                                                                                                                                             |
| IPI00756703.1 | P63328-2 | Ppp3ca  | Isoform 2 of Serine/threonine-protein phosphatase 2B catalytic subunit alpha isoform |                                                                                                                                                                                                            |                                                                                                                                                                                                                    | DAMPDANLNSINK,QLTQSAIK                                                                                                                                                                                                                                                                                          |
| IPI00109415.1 | P97470   | Ppp4c   | Serine/threonine-protein phosphatase 4 catalytic subunit                             |                                                                                                                                                                                                            |                                                                                                                                                                                                                    | QIEQLR,IFCVHGGLSPSIQTLDQIR                                                                                                                                                                                                                                                                                      |
| IPI00457950.2 | Q91VJ5   | Pqbp1   | Polyglutamine-binding protein 1                                                      | KDEELDPMDPSSYS DAPR,IEGLPPSW<br>YK,TGADTTAAGPLFQQR,DEELDPMD<br>PSSYS DAPR,HLEPEPEEEIIAEDYDDD<br>PVDYEATR                                                                                                   |                                                                                                                                                                                                                    |                                                                                                                                                                                                                                                                                                                 |
| IPI00121788.1 | P35700   | Prdx1   | Peroxisredoxin-1                                                                     | GLFIIDDK,SVDEIIR,ADEFK,K<br>QGGLGPMNIPLISDPK,DISLSEYK,QG<br>GLGPMNIPLISDPK,LVQAFQFTDK,AT<br>AVMPDGQFK,SVDEIIRLVQAFQFTDK                                                                                    | QITINDLPVGR,SVDEIIR,TIAQDY<br>GVLK,KQGGLGPMNIPLISDPK,DI<br>SLSEYK,IGYPAPNFK,LVQAFQFT<br>DK,HGEVCPAGWKPGSDTIKPDV<br>NK,GLFIIDDK,KLNCQVIGASVDS<br>HFCHLAWINTPK,ATAVMPDGQF<br>K,ADEGISFR,LNCQVIGASVDSHF<br>CHLAWINTPK | QITINDLPVGR,GKYVFFFYPLDFT<br>FVCPT EIIAFSDR,SVDEIIR,TIAQDY<br>GVLK,YVFFFYPLDFTFVCPT EIIAF<br>SDR,KQGGLGPMNIPLISDPK,DISL<br>EYK,RTIAQDYGVLK,LVQAFQFTDK,<br>IGYPAPNFK,HGEVCPAGWKPGSD<br>TIKPDV NK,GLFIIDDK,QGGLGPMNI<br>PLISDPK,PGSDTIKPDV NK,ATAV<br>PDGQFK,HGEVCPAGWK,ADEGISF<br>R,LNCQVIGASVDSHFCHLAWINTP<br>K |

|               |          |        |                                                                    |                                                                                             |                                                                                                                                                                              |                                                                                                              |
|---------------|----------|--------|--------------------------------------------------------------------|---------------------------------------------------------------------------------------------|------------------------------------------------------------------------------------------------------------------------------------------------------------------------------|--------------------------------------------------------------------------------------------------------------|
| IPI00117910.3 | Q61171   | Prdx2  | Peroxisredoxin-2                                                   | SKEYFSK,EGGLGPLNIPLADVTK,EYFSK,SAPDFTATAVVDGAFK,KEGGLGPLNIPLADVTK                           | GLFIIDAK,EGGLGPLNIPLADVTK,SLSQNYGVLK,KLGCEVLGVSVDSQFTHLAWINTPR,SAPDFTATAVVDGAFK,KGCEVLGVSVDSQFTHLAWINTPR,KEGGLGPLNIPLADVTK,LVQAFQYTDEHGEVCPAGWKPGSDTIKPNVDDSK                | NDEGIAYR,EGGLGPLNIPLADVTK,QITVNDLPVGR,SLSQNYGVLK,SAPDFTATAVVDGAFK,HGEVCPAGWK,KEGGLGPLNIPLADVTK               |
| IPI00116192.1 | P20108   | Prdx3  | Thioredoxin-dependent peroxide reductase, mitochondrial            |                                                                                             | DYGVLLESAGIALR,GLFIIDPNGVVK                                                                                                                                                  |                                                                                                              |
| IPI00555059.2 | O08709   | Prdx6  | Peroxisredoxin-6                                                   |                                                                                             | DINAYNGETPTEK,DLAILLGMMLDPVEK,VVDSLQLTGTPVATPVVDWVDSLQLTGTK,LPFPIIDDK,VVDSLK,VVFIKGPDK,FHDFLGDSWGILFQLTGTKPVATPVVDWK,LSILYPATTSHPR,VVFIKGPDKK,LSILYPATTRGR,LIALSIDSVEDHLAWSK |                                                                                                              |
| IPI00132089.2 | Q8C6A3   | Prep   | Putative uncharacterized protein                                   |                                                                                             | YVLLSIWEGCDPVNR,FIATLQYIVGR                                                                                                                                                  | VFLDPNTLSDDGTVALR,NILQLHDLTTGALLK,YSCHFKA,ITVPFLEQCPIR,YSPLHNVK                                              |
| IPI00114069.1 | P33610   | Prim2  | DNA primase large subunit                                          | ISLDQIDSLSTK,EQDIMASSPSLSGIK,LQPLLNHLSHSYTGQDYSTQK,IPASGISQILDVVK                           |                                                                                                                                                                              |                                                                                                              |
| IPI00223185.5 | Q9R078   | Prkab1 | 5'-AMP-activated protein kinase subunit beta-1                     | APEKEEFLAWQHDLEANDK,SQNNFVAILDPEGEHQYK,APPILPPHLLQVILNK,FKAPPILPPHLLQVILNK,KTDFEVFDALMVDSQK |                                                                                                                                                                              |                                                                                                              |
| IPI00230005.3 | P05132   | Prkaca | Isoform 1 of cAMP-dependent protein kinase catalytic subunit alpha |                                                                                             |                                                                                                                                                                              | DLKPENLLIDQQGYIQVTDFGFAKR,ILQAVNFPFLVK                                                                       |
| IPI00120495.1 | Q9JIF0   | Prmt1  | Isoform 1 of Protein arginine N-methyltransferase 1                |                                                                                             | GKVEEVELPVEK,ATLYVTAIEDR,ANKLDHVVTIK,DLDFITDLDFK,VEDLFTSPFCLQVK                                                                                                              | TGFSTSPESPYTHWK,WLAPDGLIFPDR,NSMFHNR,VIGIECSSISDYAVK                                                         |
| IPI00229845.3 | Q8CIG8   | Prmt5  | Protein arginine N-methyltransferase 5                             |                                                                                             | VPEEEKETNVQVLMVLGAGR,IAVALEIGADLPSNHVIDR,GPLVNASLR,GYEDYLQSPQLPLMDNLESQTYEVFEKDPIK                                                                                           | LHNFHQLSAPK,VPLVAPEDLR,DLNCVPEIADTLGAVAK,ADIIVSELLGSFADNELSPECLDGAQHFLK,GPLVNASLR,AAILPTSIFLTK               |
| IPI00654420.1 | Q3UYN1   | Prosc  | Putative uncharacterized protein                                   | LMAVPNLSMLETVDVSK,TFGENYVQELLEK                                                             |                                                                                                                                                                              | LMAVPNLSMLETVDVSKLADK,KGPTTEPLK,HGLLPSETIAVVEHIK                                                             |
| IPI00222760.1 | Q99KP6-2 | Prpf19 | Isoform 2 of Pre-mRNA-processing factor 19                         |                                                                                             |                                                                                                                                                                              | VAHPIRPKPPSATSIPAILK,ATVLTTER,VTSVVFHPSQELVFSASPDATIR,IWSVPNTSCVQVVR,QVASHVGLHSASIPGILALDLCPSDTNK,STEQILATLK |

|               |        |         |                                                              |                                                                                                                                                                                                                                                                                                                                                                                                                                                                 |                                                                                                                  |
|---------------|--------|---------|--------------------------------------------------------------|-----------------------------------------------------------------------------------------------------------------------------------------------------------------------------------------------------------------------------------------------------------------------------------------------------------------------------------------------------------------------------------------------------------------------------------------------------------------|------------------------------------------------------------------------------------------------------------------|
| IPI00331170.1 | Q922U1 | Prpf3   | U4/U6 small nuclear ribonucleoprotein Prp3                   | LQAEISQAAR,IEANAGQLYLTGVVVLH<br>K,FEEVEEEPEVIPGPPSESPGMLTK,H<br>GAEHYWDLALSESVLESTD,TPSSSQP<br>ERLPIGNTIQPSQAATFMNDAIEK,AAD<br>HLKPFLDDSTLR,LPIGNTIQPSQAATF<br>MNDIAIEK,EKPSDEMSENTEFFDPR,QL<br>SFISPPAPQPK,KHGAEHYWDLALSES<br>VLESTD                                                                                                                                                                                                                           | VLGFSEPTVVTAALNCVVGK,CVLVW<br>EGTAK                                                                              |
| IPI00331424.8 | Q8CCF0 | Prpf31  | Isoform 1 of U4/U6 small nuclear ribonucleoprotein Prp31     |                                                                                                                                                                                                                                                                                                                                                                                                                                                                 | FPELESVLPNALDYIR,IMGVAGGLT<br>NLSK                                                                               |
| IPI00226155.3 | Q4FK66 | Prpf38a | Isoform 1 of Pre-mRNA-splicing factor 38A                    | YVLEEAQELEPR,YLEPLYNDYR                                                                                                                                                                                                                                                                                                                                                                                                                                         |                                                                                                                  |
| IPI00458908.2 | Q9DAW6 | Prpf4   | U4/U6 small nuclear ribonucleoprotein Prp4                   | LWIANYSLPR,SLNNFCSQIGDDR,ALG<br>EPITLFGEGPAER                                                                                                                                                                                                                                                                                                                                                                                                                   |                                                                                                                  |
| IPI00130409.1 | Q91YR7 | Prpf6   | Isoform 1 of Pre-mRNA-processing factor 6                    | PFLGMPAPLGYVPGLGR,LSQVSDSV<br>SGQTVVDPK,DDEEADAIYAALDK,GYL<br>TDLNSMIPTHGGDIINDIKK                                                                                                                                                                                                                                                                                                                                                                              |                                                                                                                  |
| IPI00850200.1 | A5D6Q4 | Prpf8   | pre-mRNA processing factor 8                                 | FNTGPVGK,SGLNQIPNRR,FGDLI<br>LK,DLILADYGK,ALDIPLVK,EAVV<br>NTQELLDLLVK,ISLIQIFR,HDVNL<br>GR,SLPVEEQPK,LGNVDAFQLAD<br>GLQYIFAHVGQLTGMYSR,ATEPQ<br>MVLFNLYDDWLK,FICISDLR,EVG<br>IEFMDLYSHLVPVYDVEPLEK,DG<br>PYITAEAEAVAVYTTTTHWLESR,T<br>NHIYVSSDDIK,LLILALER,TFEGN<br>LTTKPINGAIFIFNPR,GTYFPTWE<br>GLFWEK,IDLTLNLR,YL TEHPDPN<br>NENIVGYNNKK,LANQLLTDLVDD<br>NYFYLFDLK,YWIDIQLR,IIHTSVW<br>AGQK,ANPALYVLR,AVFWDIK,VY<br>LGALK,NNVINYK,TAEEVAALIR,<br>TILQHLSEAWR | EQSQLTATQTR,HLIYYR,FSPIPFPP<br>LSYK,TDMIQALGGVEGILEHTLFK,V<br>PGLPTPIENMILR,TEDPDLPAFYFD<br>PLINPISHR,FPPVVFYTPK |
| IPI00153950.1 | Q8R574 | Prpsap2 | Phosphoribosyl pyrophosphate synthetase-associated protein 2 |                                                                                                                                                                                                                                                                                                                                                                                                                                                                 | IAIIVDDIIDDVDSFLAAETLK,VQI<br>QESVR                                                                              |
| IPI00831675.1 | B2RW88 | Prr19   | Proline rich 19                                              |                                                                                                                                                                                                                                                                                                                                                                                                                                                                 | GALESHTPQLPTKPCSPVGVQEP<br>DLQSK,RNLVQESR                                                                        |
| IPI00130391.1 | Q9Z1R9 | Prss1   | protease, serine, 1                                          | LGEHNINVLEGNEQFIDAAK,IQVRLGE<br>HNINVLEGNEQFIDAAK,KTLNNDIMLIK<br>,LGEHNINVLEGNEQFIDAAKIIKHPNFN<br>LGEHNINVLEGNEQFIDAAK<br>R                                                                                                                                                                                                                                                                                                                                     |                                                                                                                  |
| IPI00403650.2 | P07146 | Prss2   | Anionic trypsin-2                                            | LGEHNINVLEGNEQFVDSAK,TLDNDI<br>MLIK                                                                                                                                                                                                                                                                                                                                                                                                                             |                                                                                                                  |
| IPI00321190.1 | Q61207 | Psap    | Sulfated glycoprotein 1                                      |                                                                                                                                                                                                                                                                                                                                                                                                                                                                 | TVVTEAGNLLK,LVSDVQTAVK                                                                                           |

|               |        |       |                                                |                                                                                                                                                          |                                                                                                         |                                                                 |
|---------------|--------|-------|------------------------------------------------|----------------------------------------------------------------------------------------------------------------------------------------------------------|---------------------------------------------------------------------------------------------------------|-----------------------------------------------------------------|
| IPI00115257.1 | Q99JF8 | Psip1 | Isoform 1 of PC4 and SFRS1-interacting protein | NMFLVGE GDSVITQVLNK,QVDTEEAG<br>MVTAATASNVK,DFKPGDLIFAK,LPIFF<br>FGTHETAFLGPK,FKNMFLVGE GDSVI<br>TQVLNK,GFNEGLWEIDNNPK,LQRIHA<br>EIKNSLK,KGFNEGLWEIDNNPK | VDEVPDGAVKPPTNK,DFKPGDLI<br>FAK,LPIFFFGTHETAFLGPK                                                       | GYPHWPAR,LPIFFFGTHETAFLGP<br>K                                  |
| IPI00283862.6 | Q9R1P4 | Psm1  | Proteasome subunit alpha type-1                | IHQIEYAMEAVK,NQYDNDVTWSPQ<br>GR                                                                                                                          | ILHVDNHIGISIAGLTADAR,DLEFT<br>IYDDDDVSPFLDGLERPQR,FVF<br>DRPLPVS,ETLPAEQDLTTK,TH<br>AVLVALK             | QGSATVGLK,FVFDRLPVS,THAV<br>LVALK                               |
| IPI00420745.7 | Q3UWT6 | Psm2  | Proteasome subunit alpha type                  | YNEDLEDAIHTAILTK,GYSFSLTTF<br>SPSGK,PYLFQSDPSGAYFAWK,LAQQ<br>YYLVYQEPIPTAQLVQR,LVQIEYALAA<br>VAGGAPSVGIK,RYNEDLEDAIHTAI<br>LTLK                          | YNEDLEDAIHTAILTK,GYSFS<br>LTFSPSGK,LVQIEYALAAVAGG<br>APSVGIK,LAQQYYLVYQEPIPTA<br>QLVQR,RLTPTEVR         |                                                                 |
| IPI00331644.5 | O70435 | Psm3  | Proteasome subunit alpha type-3                |                                                                                                                                                          | AVENSSTAIGIR,SNFGYNIPLK,AF<br>EELSWVGELTK,LFNVDR,IYIVH<br>DEVK                                          | AVENSSTAIGIR,SNFGYNIPLK                                         |
| IPI00277001.4 | Q9R1P0 | Psm4  | Proteasome subunit alpha type-4                |                                                                                                                                                          | RPFVGSLLYIGWDK,LLDEVFFSE<br>K,YLLQYQEPIPCQLVTALCDIK,<br>VEIATLTR                                        | LNEDMACSVAGITSDANVLTNELR,<br>YLLQYQEPIPCQLVTALCDIK,VEIA<br>TLTR |
| IPI00131407.1 | Q9Z2U1 | Psm5  | Proteasome subunit alpha type-5                |                                                                                                                                                          | SSLILK,IVEIDAHIGCAMGLIADA<br>K,LFQVEYAIK,PFVALLFGG<br>VDEK,GVNTFSPEGR,EELEEVK<br>DI,AIGSASEGAQSSLQEVYHK |                                                                 |
| IPI00131845.1 | Q9QUM9 | Psm6  | Proteasome subunit alpha type-6                | ILTEAEIDAHLVALAER,IADISQVYTQN<br>AEMR                                                                                                                    | LYQVEYAFK,HITIFSPEGR,ILTEA<br>EIDAHLVALAERD,LLDSSTVTHLF<br>K,AINQGGLTSVAVR                              | LLDSSTVTHLFK,AINQGGLTSVAVR                                      |
| IPI00131406.1 | Q9Z2U0 | Psm7  | Proteasome subunit alpha type-7                | YIASLK,LTVEDPVTVEYITR,NYTDDAIE<br>TDDLTIK,IVINR,YVAIEK,ALLEVVQS<br>GGK,AITVSPDGHLFQVEYAEVKK,<br>RPFGISALIVGDFDGTTPR                                      | LTVEDPVTVEYITR,AITVSPDGH<br>LFQVEYAEVKK,ALLEVVQSGG<br>K,YVAIEKEKEENEK,GKDIVVLG<br>VEK                   | LTVEDPVTVEYITR,ALLEVVQSGGK                                      |
| IPI00113845.1 | O09061 | Psm1  | Proteasome subunit beta type-1                 |                                                                                                                                                          | LSEGFHSIHR,DVFISAAER,DVYT<br>GDALR,FFPYVYNIIGGLDEEGK                                                    | AGGSASAMLQPLLDNQVGFK,GAV<br>YSFDPVGSYQR                         |
| IPI00128945.1 | Q9R1P3 | Psm2  | Proteasome subunit beta type-2                 |                                                                                                                                                          | VIDKDGHNLENIAFPK,FILNLPTF<br>SVR,NLADCLR,ILLLCVGEAGDTV<br>QFAEYIQK                                      |                                                                 |
| IPI00314467.3 | Q9R1P1 | Psm3  | Proteasome subunit beta type-3                 |                                                                                                                                                          | DAVSGMGVIVHVEK,LNLYELK,N<br>CVAIAADRR,LYIGLAGLATDVQTV<br>AQR                                            | FGPYTTEPVIAGLDPK,LYIGLAGLAT<br>DVQTVQQR,NCVAIAADR               |
| IPI00129512.3 | P99026 | Psm4  | Proteasome subunit beta type-4                 |                                                                                                                                                          |                                                                                                         | AIHSLWTR,QPVLSQTEAR,FQIATV<br>TEK                               |

|               |        |         |                                                      |                                                                                                                                                                                                              |                                                                                                                                   |                                                                                                         |
|---------------|--------|---------|------------------------------------------------------|--------------------------------------------------------------------------------------------------------------------------------------------------------------------------------------------------------------|-----------------------------------------------------------------------------------------------------------------------------------|---------------------------------------------------------------------------------------------------------|
| IPI00317902.3 | O55234 | Psmb5   | Proteasome subunit beta type-5                       |                                                                                                                                                                                                              | VEEAYDLAR,RGPGLYYVDSEGN<br>R,FLHGVIVAADSR,GYSYDLKVE<br>EAYDLARR,VSSDNVADLHDK,DA<br>YSGGAVNLYHVR,ATAGAYIASQT<br>VK                 | LLANMVYQYK,VSSDNVADLHDK,K<br>VIEINPYLLGTMAGGAADCSFWER,<br>ATAGAYIASQTVK                                 |
| IPI00119239.2 | Q60692 | Psmb6   | Proteasome subunit beta type-6                       |                                                                                                                                                                                                              | LAAIQESGVER,TTTGSYIANR,SG<br>SAADTQAVADAVTYQLGFHSIEL<br>NEPPLVHTAASLFK                                                            | QVLLGDQIPK,LAAIQESGVER,TTT<br>GSYIANR,SGSAADTQAVADAVTYQ<br>LGFHSIELNEPPLVHTAASLFK                       |
| IPI00136483.1 | P70195 | Psmb7   | Proteasome subunit beta type-7                       | VTPLEIEVLEETVQTMDS,LPYVTMG<br>SGSLAAMAVFEDK                                                                                                                                                                  | YQGYIGAALVLGGVDVTGPHLYSI<br>YPHGSTDK,VTPLEIEVLEETVQT<br>MDS,LVSEAIAGIFNDLGSGSNI<br>DLCVISK                                        |                                                                                                         |
| IPI00133428.3 | P62192 | Psmc1   | 26S protease regulatory subunit 4                    | VAAEHAPSIVFIDEIDAIGTK,IKDYLLME<br>EEFIR,TMLELLNQLDGFDSR,DYLLME<br>EEFIR,ESVELPLTHPEYEEEMGIKPPK,<br>APQETYADIGGLDNQIQEIK,MTLADDV<br>TLDDLIMAK,VHAVIGVLMDDTDPLVTV<br>MK                                        | VAAEHAPSIVFIDEIDAIGTK,KIEF<br>PLPDEK,TMLELLNQLDGFDSR,A<br>PQETYADIGGLDNQIQEIK,LPLVT<br>PHTQCR                                     | IFQIHTSR,APQETYADIGGLDNQIQ<br>EIK,AVANQTSATFLR                                                          |
| IPI00270326.1 | Q8BVQ9 | Psmc2   | Putative uncharacterized protein                     | FVNLGIEPPK,GVLLFGPPGTGK,ESDT<br>GLAPPALWDLAADK,QVEDDIQQLLK,<br>VLMATNRPDTLDPALMRPGR,FVVDLS<br>DQVAPTDIEEGMR,TMLELINQLDGF<br>PR,ALDEGDIALLK                                                                   |                                                                                                                                   | FVNLGIEPPK,ESDTGLAPPALWDLA<br>ADK,QLQSEQPLQVAR,YQIHIPLP<br>PK                                           |
| IPI00758064.1 | A2AGN7 | Psmc3   | Proteasome (Prosome, macropain) 26S subunit ATPase 3 | PGDLVGVNK,QTYFLPVIGLVDAEK,VD<br>ILDPELLR,LAGPQLVQMFIGDGAK,MN<br>VSPDVNYEELAR,APSIIFIDELDAIGTK,<br>KMNVSPDVNYEELAR,QIQELVEAIVLP<br>MNHK,TMLELLNQLDGFQPNQVQK,AM<br>EVDERPTEQYSDIGGLDK,GATELTHE<br>DYMEGILEVQAK | DSYLILETLPTHEYDSR,LKPGDLVG<br>VNK                                                                                                 | FENLGIQPPK,QTYFLPVIGLVDAEK,<br>VDILDPELLR                                                               |
| IPI00126349.1 | O35047 | Psmc3ip | Homologous-pairing protein 2 homolog                 | IYFADQNQFDTVSDADLHGLDASIVAL<br>TAK,ELTSALTTPEMQK,YLQEQNRPY<br>SAQDVFGNLQK                                                                                                                                    |                                                                                                                                   |                                                                                                         |
| IPI00828513.1 | Q6ZWN9 | Psmc4   | proteasome 26S ATPase subunit 4                      |                                                                                                                                                                                                              | EFLHAQEEVKR,ELLKPNASVALH<br>K,AVAHHTTAAAFIR,IQSIPLVIGQF<br>LEAVDQNTAIVGSTTGSNYYVR,E<br>NAPAIIFIDEIDAIAIK,VVGSEFVQ<br>K,RFDAQTGADR | ELLKPNASVALHK,IQDEIPALSVSR,<br>PQTGLSFLGPEPEDLEDLYSR,AVA<br>HHTTAAAFIR,LIFSTITSK,ENAPAIIFID<br>EIDAIAIK |
| IPI00135640.1 | P62196 | Psmc5   | 26S protease regulatory subunit 8                    | FVVDVDKNIDINDVTPNCRVALR,EELQ<br>LLQEQQSYVGEVVR,IEELQLIVNDK,H<br>PELFEALGIAQPK                                                                                                                                | VSGSELVQK,IEELQLIVNDK,LEG<br>GSGGDSEVQR                                                                                           | VIMATNRIDILDSALLR,NDSYTLHK,<br>EELQLLQEQQSYVGEVVR,AVAHHT<br>DCTFIR,TMLELLNQLDGFTEATK,FIG<br>EGAR        |
| IPI00125971.1 | P62334 | Psmc6   | 26S protease regulatory subunit S10B                 | ALQSVGQIVGEVLK,TLMELLNQMDGF<br>DTLHR,EVIELPLTNPELFQR                                                                                                                                                         | ALQSVGQIVGEVLK,EVIELPLTNP<br>ELFQR                                                                                                | ALQSVGQIVGEVLK,VVSSIVDK,A<br>VASQLDCNFLK,IHIDLPEQAR,IHA<br>GPITK,EVIELPLTNPELFQR                        |

|               |          |       |                                                                  |                                                                                                                                                                                                                                       |                                                                                                                                                                                                                              |                                                                                                                                                                |
|---------------|----------|-------|------------------------------------------------------------------|---------------------------------------------------------------------------------------------------------------------------------------------------------------------------------------------------------------------------------------|------------------------------------------------------------------------------------------------------------------------------------------------------------------------------------------------------------------------------|----------------------------------------------------------------------------------------------------------------------------------------------------------------|
| IPI00875405.1 |          | Psm1  | 111 kDa protein                                                  |                                                                                                                                                                                                                                       | FTATASLGVHKK,YQPFKPLSIGGII<br>ILK,DTSPGSAYQEGGGLYALGLI<br>HANHGGDIIDYLLNQLK,VSTAVLS<br>ITAK,AAVESLGFILFR,GLAVGIAL<br>VMYGR,LLHVAVSDVNDVDR,FG<br>AIIAQQILDAGGHNVITISLQSR,ME<br>VDEAEK                                         | FTATASLGVHKK,RVQGAAMITSAAG<br>IISLLDEEEPQLK,DTSEDVEELVEPV<br>AAHGPK,MITSAAGIISLLDEEEPQLK                                                                       |
| IPI00222515.5 | Q8BG32   | Psm11 | 26S proteasome non-ATPase regulatory subunit 11                  | TYEAALETIQNMASK,YQEALHLGSQLL<br>R,LQATLDMQSGIIHAAEEK,LYDNLLE<br>QNLIR,EQSILELGSLLAK                                                                                                                                                   | AELRDDPIISTHLAK,YQEALHLGS<br>QLLR,ALLVEVQLLESK,LYDNLLE<br>QNLIR,VQIEHISSLIK,IMLNTPELV<br>QALVSGK,EQSILELGSLLAK,TGQ<br>AAELGGLLK                                                                                              | YQEALHLGSQLLR,YVRPFLNSISK,L<br>YDNLLEQNLIR,TYHALSNLPK,VQIE<br>HISSLIK,IMLNTPELVQALVSGK,TG<br>QAAELGGLLK,EQSILELGSLLAK                                          |
| IPI00318982.3 | Q9D8W5   | Psm12 | 26S proteasome non-ATPase regulatory subunit 12                  |                                                                                                                                                                                                                                       | SVVLYVILAPFDNEQSDLVHR,MA<br>QLLDLSVDESEAFLSNLVVK,IYV<br>EIER,LQEVIETLLSLEK                                                                                                                                                   | LNSLMSLVNK,LQEVIETLLSLEK,KL<br>EEIPK                                                                                                                           |
| IPI00126048.2 | Q9WVJ2   | Psm13 | Isoform 1 of 26S proteasome non-ATPase regulatory subunit 13     |                                                                                                                                                                                                                                       | DLPVSEQQER,VLDLQQIK,ALSV<br>GLVR,VNPLSLVEIILHVVR,AFTLG<br>LAGLLGEGVFNFGELLMHPVLES<br>LR,VELLMK,GSIDEVDKR,LNIGD<br>LQATK                                                                                                      | CAWGQQPDLAANEQQLR,VLDLQ<br>QIK,LNIGDLQATK                                                                                                                      |
| IPI00113262.1 | O35593   | Psm14 | 26S proteasome non-ATPase regulatory subunit 14                  |                                                                                                                                                                                                                                       | VVIDAFR,LGGGMPGLGQGPPTD<br>APAVDTAEQVYISSLALLK,AVAVV<br>VDPIQSVK                                                                                                                                                             | LGGGMPGLGQGPPTDAPAVDTAE<br>QVYISSLALLK,AVAVVVDPIQSVK                                                                                                           |
| IPI00123494.3 | Q8VDM4   | Psm2  | 26S proteasome non-ATPase regulatory subunit 2                   |                                                                                                                                                                                                                                       | YGEPTLR,SHYVLYGLVAAMQPR,<br>FGGSGSQVDSAR,VQQLLHICSE<br>HFDSK,HLAGEVAK,GEAIEAILAA<br>LEVSEPFRR,DKTPVQSQQPSAT<br>TPSGADEK,AELATEEFLPVTPILE<br>GFVILR,EIVPYNMAHNAEHEACD<br>LLMEIEQVDMLEK,MLVTFDEELR<br>PLPVSVR,VGQAVDVVGGQAGKPK | LNILDTLISK,VGQAVDVVGGQAGK,QL<br>QDELEMLVER,FGGSGSQVDSAR,L<br>AQGLTHLGGK,LVGSQEELASWGHE<br>YVR,AELATEEFLPVTPILEGFVILR,F<br>LRPHYGK,ELDIMEPK,VGQAVDVV<br>GQAGKPK |
| IPI00314439.3 | P14685   | Psm3  | 26S proteasome non-ATPase regulatory subunit 3                   | LQLDSPEDAEIFIVAK,ISDDLQKISTQ<br>NHR,HDADGQATLLNLLLR,FQTDGTY<br>TLIIR,AKPPPGGEQEPAPQDVEM<br>KEEAAAGSGSTGEGDGK,FNQVLDQF<br>GEK,NYLHYSLYDQAEK,AKPPPGGEQ<br>EPPPPAPQDVEMK,SVFPEQANNNEW<br>AR,ELDTVTLEDIK,ELDTVTLEDIKEHV<br>R,VYEFLDKLDVVR | LQLDSPEDAEIFIVAK,ISLADIAQK,SL<br>MPYFLLTQAVR,FNQVLDQFGEK,K<br>APQHTAVGFK                                                                                                                                                     |                                                                                                                                                                |
| IPI00381291.1 | O35226-2 | Psm4  | Isoform Rpn10B of 26S proteasome non-ATPase regulatory subunit 4 | SVMGALASQATK,AAAASAAEAGIATP<br>GTEGERDSDALLK,AAAASAAEAGIA<br>TPGTEGER,IIAFVGSPPVEDNEKDLVK,<br>EKVNVDIINFGEVEEVTNEK,IIAFVGSPPV<br>EDNEK,VNVDIINFGEVEEVTNEK                                                                             |                                                                                                                                                                                                                              |                                                                                                                                                                |

|               |        |       |                                                                  |                                                                                                                                                                                                                                                                    |                                                                                                                                                                                       |                                                                                                                                                                                                    |
|---------------|--------|-------|------------------------------------------------------------------|--------------------------------------------------------------------------------------------------------------------------------------------------------------------------------------------------------------------------------------------------------------------|---------------------------------------------------------------------------------------------------------------------------------------------------------------------------------------|----------------------------------------------------------------------------------------------------------------------------------------------------------------------------------------------------|
| IPI00128564.1 | O35226 | Psm�4 | Isoform Rpn10A of 26S proteasome non-ATPase regulatory subunit 4 | SVMGALASQATK,AAAASAAEAGIATP<br>GTEDSDDALLK,IIAFVGSPPVEDNEKDL<br>VK,EKVNVDIINFGEVEVNTTEK,IIAFVG<br>SPVEDNEK,VNVDIINFGEVEVNTTEK                                                                                                                                      |                                                                                                                                                                                       |                                                                                                                                                                                                    |
| IPI00457661.5 | Q8BJY1 | Psm�5 | 26S proteasome non-ATPase regulatory subunit 5                   |                                                                                                                                                                                                                                                                    | LLQAVEPIHLAR,IVENSEAVTEILNN<br>AELLK,ALQSVVQAVPLHELK                                                                                                                                  |                                                                                                                                                                                                    |
| IPI00319965.3 | Q99JI4 | Psm�6 | 26S proteasome non-ATPase regulatory subunit 6                   |                                                                                                                                                                                                                                                                    | VNEIVETNRPSDK,LDIVFYLLR,G<br>AEILEVLHSLPAVR VNEIVETNRPSDK,KGDLLLNR,SLTL<br>GYMAEAFGVGVDFIDQELSR                                                                                       |                                                                                                                                                                                                    |
| IPI00114667.1 | P26516 | Psm�7 | 26S proteasome non-ATPase regulatory subunit 7                   |                                                                                                                                                                                                                                                                    | TFEHTVSEIGAEAEVEVGVHLLR<br>,VVGVLLGSWQK,ITNQVHGLK,LP LPINHQIYQLQDVFNLLPDASLQEF<br>INHQIYQLQDVFNLLPDASLQEFV VK,VVVHPLVLLSVVDHFNR,SVVAL<br>K,SVVALHNLINNK,VVVHPLVLLS HNLINNK<br>VVDHFNR |                                                                                                                                                                                                    |
| IPI00856490.1 |        | Psm�8 | proteasome 26S non-ATPase subunit 8                              |                                                                                                                                                                                                                                                                    | LVLLELNFLPTTGTK,VAEFHTELE<br>R                                                                                                                                                        |                                                                                                                                                                                                    |
| IPI00124223.3 | P97371 | Psmē1 | Proteasome activator complex subunit 1                           | TENLLGSYFPK,EPALNEANLSNLK,KG<br>DEDDKGPCCGPNVCNEK,QLVHELDE<br>AEYQEIR,APLDIPVDPVK                                                                                                                                                                                  |                                                                                                                                                                                       |                                                                                                                                                                                                    |
| IPI00649986.2 |        | Psmē2 | proteasome activator subunit 2 isoform 2                         |                                                                                                                                                                                                                                                                    | AFYAELYHIISSNLEK,TKVEAFQT<br>TISK                                                                                                                                                     |                                                                                                                                                                                                    |
| IPI00649191.2 |        | Psmē3 | Proteasome (Prosome, macropain) 28 subunit, 3                    | TVSEEAASYLDQISR,SNQQLVDIIEK                                                                                                                                                                                                                                        | TVSEEAASYLDQISR,LLELDSFLK,IT<br>SEAEDLVANFFPK                                                                                                                                         |                                                                                                                                                                                                    |
| IPI00396680.3 | Q5SSW2 | Psmē4 | Isoform 1 of Proteasome activator complex subunit 4              |                                                                                                                                                                                                                                                                    | FVEQLITFLSLEDR,SLFLIHK,LSTS<br>SYSQVR,LLYELVSIPK,DIIPLVLEF<br>LRPDR,AVQLQELWPGGLFWTR,<br>EVIASVIR,VFNFSVSHIFETR,LDA<br>ESDLQLAQIK,LPNSVVR,LFDDLA<br>EK,FFVENLNHDAIVVR,LLINLLK         |                                                                                                                                                                                                    |
| IPI00321266.5 | Q8R326 | Pspc1 | Isoform 1 of Paraspeckle component 1                             | LFVGNLPTDITEEDFKR,LFVGNLPTDIT<br>EEDFK,NLSPVVSNELLEQAQFSGFPV<br>EK,TLAEIAK,YGEPSEVFINR,GTIPGPP<br>MGPGPAMGPEGAANMGTPMIPDNGA<br>VHNDR,GAINMGDAFSPAPAGTQGGP<br>PMMGMNMNMR,TGSETPQAPMSGVG<br>PVSGGGGFGFR,TLAEIAKAELDGTILK<br>,PVIVEPMEQFDDDEDGLPEK,FAQPGT<br>FEFEYASR | LFVGNLPTDITEEDFK,NLSPVVSNE<br>LLEQAQFSGFPVEK,SFLKPGEK                                                                                                                                 |                                                                                                                                                                                                    |
| IPI00117146.1 | Q99LS3 | Psph  | Phosphoserine phosphatase                                        |                                                                                                                                                                                                                                                                    | NVQVFLISGGFR,SIVEHVAAK                                                                                                                                                                |                                                                                                                                                                                                    |
| IPI00475378.4 | Q92217 | Ptbp1 | polypyrimidine tract binding protein 1 isoform 1                 | NFQNIFFPSATLHLSNIPPSVSEDDLK,I<br>AIPGLAGAGNSVLLVSNLNPER,VTPQ<br>SLFILFGVYGDVQR                                                                                                                                                                                     | LPSDVTEGEVISLGLPFGK,NNQF<br>QALLQYADPVSAQHAK,IIVENLFY<br>PVTLDVLHQIFSK,IAIPGLAGAGN<br>SVLLVSNLNPER,LSLDGQNIYNA<br>CCTLR,FKGDNRSAGVPSR,KLPS<br>DVTEGEVISLGLPFGK,VTPQSLFI<br>LFGVYGDVQR | NFQNIFFPSATLHLSNIPPSVSEDDL<br>K,LPSDVTEGEVISLGLPFGK,AQAA<br>LQAVNSVQSGNLALAASAAAVDAG<br>MAMAGQSPVLR,IIVENLFYPTLDV<br>LHQIFSK,NNQFQALLQYADPVSAQ<br>HAK,IAIPGLAGAGNSVLLVSNLNPE<br>R,LSLDGQNIYNACCTLR |



|               |          |           |                                                               |                                                                                                                   |                                                                                                             |                                                                               |
|---------------|----------|-----------|---------------------------------------------------------------|-------------------------------------------------------------------------------------------------------------------|-------------------------------------------------------------------------------------------------------------|-------------------------------------------------------------------------------|
| IPI00338458.2 | Q3UK51   | Ptcd3     | Putative uncharacterized protein                              |                                                                                                                   | ASGSTALAEVVK,LASAFSLPIGE<br>SLAQR                                                                           | IPALQILR,LLNTGDNRKLVGHDPLC<br>K,EEVLMMLMAR                                    |
| IPI00225419.1 | P29351-2 | Ptpn6     | Isoform 2 of Tyrosine-protein phosphatase non-receptor type 6 | ESLSQPGDFVLSVLNDQPK,YTVGGSE<br>TFDSLTLVEHFK                                                                       |                                                                                                             |                                                                               |
| IPI00153702.2 |          | Pthr2     | Bcl-2 inhibitor of transcription isoform a                    |                                                                                                                   | APDEDTLIQLLTHAK,TLGLTVSLI<br>QDAGR,TVLGIGPGPVELIDEVTG<br>HLK,VAQCASHAAVSAYK                                 |                                                                               |
| IPI00127174.4 | Q3UEB3-2 | Puf60     | Isoform 2 of Poly(U)-binding-splicing factor PUF60            | PSNIGQAQPIIDQLAEEAR,QTIAHQQQ<br>QLTNLQMAAQR                                                                       | IYVASVHQDLSDDDIK,AVTPPMP<br>LLTPATPGGLPPAAAVAAAAATA<br>K,VYVGSIIYELGEDTIR,LGLPPLT<br>PEQQEALQK              | PSNIGQAQPIIDQLAEEAR,AVTPPMP<br>PLLTPATPGGLPPAAAVAAAAATAK<br>,LGLPPLTPEQQEALQK |
| IPI00330262.5 | Q80U78   | Pum1      | Isoform 1 of Pumilio homolog 1                                | SMDELNHDFQALALEGR,GIFLGDQW<br>R,SQDDAMVDYFFQR,DSAWGTS DHS<br>VSQPIMVQR                                            |                                                                                                             |                                                                               |
| IPI00876148.1 | Q69Z61   | Pwwp2a    | Isoform 1 of PWWP domain-containing protein 2A                | SAGEAPSEKPSPEGPEESAGEVQDT<br>SR,DKPDAMQLQSTTFQEGIEVK                                                              |                                                                                                             |                                                                               |
| IPI00165881.3 | Q8VI36   | Pxn       | Isoform Beta of Paxillin                                      | PGSQLDSMLGSLQSDLNK,ELDELMA<br>SLSDFK                                                                              |                                                                                                             |                                                                               |
| IPI00223055.2 | Q3TIN2   | Qars      | Putative uncharacterized protein                              | EESLLLFEAMR,ATGVLLYDLVSR,SFL<br>VSYIANK                                                                           | AMAVLEPLQVVITNFPAPKPLDIR,<br>LNLHYAVVSK,TAKDVVEKGEVA<br>GQILSLMEQLR                                         | AMAVLEPLQVVITNFPAPK,LFTLTA<br>LR,SFLVSYIANKK,FNMGLLMGEAR,<br>LNLHYAVVSK       |
| IPI00114560.5 | P62821   | Rab1      | Ras-related protein Rab-1A                                    |                                                                                                                   | EFADSLGIPFLETSK,SCLLLR,G<br>AHGIIVVYDVTQESFNNVK,KVV<br>DYTTAK,FADDTYTESYISTIGVDF<br>K,TITSSYYR              |                                                                               |
| IPI00130118.1 | P61027   | Rab10     | Ras-related protein Rab-10                                    | VELQGK                                                                                                            | NIDEHANEDVER,AFLTLAEDILR                                                                                    |                                                                               |
| IPI00135869.3 | P46638   | Rab11b    | Ras-related protein Rab-11B                                   |                                                                                                                   | GAVGALLVYDIAK,VVLIGDSGVG<br>K,STIGVEFATR                                                                    |                                                                               |
| IPI00169485.3 |          | Rab11fip1 | RAB11 family interacting protein 1                            | GPGTMWSPTHVQVTVLQAR,IANSSL<br>GTATIITENLISEALMK,AGDFQSQWDD<br>DAHEDESSASDVMSHK,EEATFELPP<br>LLSSGAAPAAAATLQLTVLHR |                                                                                                             |                                                                               |
| IPI00126042.3 | Q91V41   | Rab14     | Ras-related protein Rab-14                                    |                                                                                                                   | NLTNPNTVILIGNK,IIEVSGQK,GA<br>AGALMVYDITR                                                                   |                                                                               |
| IPI00116770.1 | P35293   | Rab18     | Ras-related protein Rab-18                                    |                                                                                                                   | ILIIGESGVGK,GAQGVILVYDVTR                                                                                   |                                                                               |
| IPI00133706.1 | Q9D1G1   | Rab1b     | Ras-related protein Rab-1B                                    |                                                                                                                   | GAHGIIVVYDVTQESYANVK,SC<br>LLLR,TITSSYYR,FADDTYTESYIS<br>TIGVDFK                                            | SCLLLR,EFADSLGVPFLETSK                                                        |
| IPI00137227.1 | P53994   | Rab2a     | Ras-related protein Rab-2A                                    |                                                                                                                   | EHGLIFMETSAC,YIIIGDTGVGK,F<br>QPVHDLTIGVEFGAR,LQIWDTAG<br>QESFR,TASNVEEAFINTAK,GAA<br>GALLVYDITR,SCLLLQFTDK |                                                                               |
| IPI00130489.1 | Q6PHN9   | Rab35     | Ras-related protein Rab-35                                    |                                                                                                                   | LLIIGDSGVGK,GTHGVIVVYDVTS<br>AESFVNVK                                                                       |                                                                               |

|               |        |         |                                                    |                                                                                                                                              |                                                                                                       |
|---------------|--------|---------|----------------------------------------------------|----------------------------------------------------------------------------------------------------------------------------------------------|-------------------------------------------------------------------------------------------------------|
| IPI00116697.1 | P35279 | Rab6    | Isoform 1 of Ras-related protein Rab-6A            | GSDVIIMLVGNK,ELNVMFIETSAK<br>,LVFLGEQSVGK                                                                                                    |                                                                                                       |
| IPI00408892.2 | P51150 | Rab7    | Ras-related protein Rab-7a                         | FQSLGVAFYR,EAINVEQAFQTIA<br>R,VIIIGDMSGVVK,TLDSWRDEFLI<br>QASPR,GADCCVLVFDVTAPNTF<br>K,LVTMQIWDTAGQER,ATIGADF<br>LTK                         | EAINVEQAFQTIA R,DPENFPFVVLG<br>NK,ATIGADFLTK                                                          |
| IPI00903426.1 | Q91WG2 | Rabep2  | Isoform 1 of Rab GTPase-binding effector protein 2 | QMQVLLAQVQNSEQLLR,LQAELETSE<br>QVQR,EIVLPMEQEITELK                                                                                           |                                                                                                       |
| IPI00108774.1 | P54728 | Rad23b  | UV excision repair protein RAD23 homolog B         | LIYAGK,AVEYLLMGIPGDR,NENLAAN<br>FLLQQNFDED,SNLFEDATSALVTGQS<br>YENMVTEIMSMGYER,QIIQQNPSLLP<br>ALLQQIGR                                       | ILSDDTALK,QIIQQNPSLLPALLQQI<br>GR                                                                     |
| IPI00420855.1 | Q6PFE3 | Rad54b  | DNA repair and recombination protein RAD54B        |                                                                                                                                              | LCNHPCLLFSSVK,TIPFGLLICDEG<br>HR,EIEILGTISSDDFNCSGK                                                   |
| IPI00225719.3 | Q8C570 | Rae1    | mRNA export factor                                 | MWDLNSNQAIQIAQHDAPVK,GLIVYQ<br>LENQPSEFR                                                                                                     |                                                                                                       |
| IPI00453820.2 | Q9EP71 | Rai14   | Ankycorbin                                         | GADLSLVDSLGHNALHYSK, LSENAGI<br>QNLLLSK                                                                                                      |                                                                                                       |
| IPI00828741.1 | A2AU63 | Raly    | hnRNP-associated with lethal yellow long isoform   | LPAPQEDTASEAGTPQGEVQTR,VLA<br>GQTLDINMAGEPKPNRPK,VLAGQTL<br>INMAGEPK,GYAFVQYANER,VFIGNLN<br>TAVVK,KKGDSSSGGGGGSSGGGGSS<br>SNVGGGSSGGSGSCSSSR | LPAPQEDTASEAGTPQGEVQTR,<br>VFIGNLNTAVVK                                                               |
| IPI00130147.2 | Q64012 | Raly    | Isoform 2 of RNA-binding protein Raly              | LPAPQEDTASEAGTPQGEVQTR,VLA<br>GQTLDINMAGEPKPNRPK,VLAGQTL<br>INMAGEPK,GYAFVQYANER,VFIGNLN<br>TAVVK                                            | LPAPQEDTASEAGTPQGEVQTR,<br>VFIGNLNTAVVK                                                               |
| IPI00321978.3 | P34022 | Ranbp1  | Ran-specific GTPase-activating protein (Fragment)  | FASENDLPEWK,TLEEDDEELFK,DSH<br>EDHDTSTENADESNHDPQFEPIVSLP<br>EQEIK,LEALSVR                                                                   | FLNAENAQK,FASENDLPEWK,TL<br>EEDDEELFK,AWVWNTHADFADE<br>CPKPELLAIR                                     |
| IPI00337844.4 | Q9ERU9 | Ranbp2  | E3 SUMO-protein ligase RanBP2                      | KYISTYINVQER,SVFTTAASELANK,NG<br>SGVVFQTSSTFTFADLAKSTSR                                                                                      | IIMELFSNIVPQTAENFRALCTGEK<br>GFGFK,IAI AVL EETTR,ILDDSDSN<br>TSVVQK,TESSDDIHFEPPVQMPE<br>KVELVTGEEDEK |
| IPI00467338.4 | P46061 | Rangap1 | Ran GTPase-activating protein 1                    |                                                                                                                                              | ILDPNSGEPAPVLSPTPTDLSTFLS<br>FPSPEK,ILAAALTECHR,TAVLDAID<br>ALMK,ELNLSFCEIK                           |
| IPI00138406.1 | P62835 | Rap1a   | Ras-related protein Rap-1A                         | LVVLGSGGVGK,INVNEIFYDLVR,<br>SALT VQFVQGIFVEK                                                                                                |                                                                                                       |

|               |        |         |                                                          |                                                                                                                                                                                                                                            |                                                                                                                                                                                                  |                                                                                                                                     |
|---------------|--------|---------|----------------------------------------------------------|--------------------------------------------------------------------------------------------------------------------------------------------------------------------------------------------------------------------------------------------|--------------------------------------------------------------------------------------------------------------------------------------------------------------------------------------------------|-------------------------------------------------------------------------------------------------------------------------------------|
| IPI00315488.1 | Q9D019 | Rars    | Arginyl-tRNA synthetase, cytoplasmic                     |                                                                                                                                                                                                                                            | GFDILGIKPVQR,DFVSEQLTSLLV<br>NGVQLPVLGDKEK,LQEVFGCAIR<br>,IYDALDITLIER,AYQCVLLQSK,F<br>PEILQK,LFEFAGYDVLRL,YADLSH<br>NR,IVFVPGCSVPLTIVK,YIDKVEI<br>AGPGFINVHLR,VIVDFSSPNIAM,V<br>TLVTHVGFVVLGEDK | DFVSEQLTSLLVNGVQLPVLGDK,V<br>EIAGPGFINVHLR,AWNLICDVSR,IV<br>FVPGCSVPLTIVK,AAYPDLENPPLIV<br>TPSQPK                                   |
| IPI00816935.4 |        | Rasa3   | RAS p21 protein activator 3                              |                                                                                                                                                                                                                                            |                                                                                                                                                                                                  | IFECQGLPIVNGQCDDPYATVTLAGP<br>FR,GDQPLCNIPNIENILAVER                                                                                |
| IPI00126133.1 | Q61820 | Rasl2-9 | GTP-binding nuclear protein Ran, testis-specific isoform | FNVWDTAGQEK,SNYNFEKPFVWLAR                                                                                                                                                                                                                 |                                                                                                                                                                                                  |                                                                                                                                     |
| IPI00719915.1 | Q9CW46 | Raver1  | Isoform 1 of Ribonucleoprotein PTB-binding 1             | GKPQPLLPPLLGPSGGDR,IPLNPNLNL<br>HSLLPSSNLAGK,KDSAARAK,GLPGD<br>VTNQEVHDLLSDYELK,GFAVLEYETA<br>EMAEAAQER,SGGGSGGPLSHFYSGS<br>PTSYFTSGLQAGLK,SMLAALIAAQATA<br>LNR,RPAEPLPSPAVPGGGSGSNNG<br>NK,TLYVHWTDAGQLTPALLHSR,LPP<br>EPGLPDSYGFYPTDVGPR |                                                                                                                                                                                                  | QGLLGAPPAMPLLSGPALSTALLQL<br>ALQSQSQNSQSQGQK,IPLNPNLNLH<br>SLLPSSNLAGK,GLPKDSGPLPTPP<br>GVSLLGEPK,LPPPEGLPDSYGFY<br>YPTDVGPR,LFSHPR |
| IPI00122696.5 | Q60972 | Rbbp4   | Histone-binding protein RBBP4                            | LNVDLSK,TPSSDVLVFDYTK,TVAL<br>WDLR                                                                                                                                                                                                         | TPSSDVLVFDYTK,TVALWDLR,IG<br>EEQSPEDAEDGPELLFIHGGHT<br>AK                                                                                                                                        | LNVDLSK,HPSKPDPSGECNPD<br>R,TPSSDVLVFDYTK,GEFGGFGS<br>SGK,NTPFLYDLVMTHALEWPSLTA<br>QWLPDVTREPGK,DFSIHR,VINEEY<br>K                  |
| IPI00226384.2 | Q3U3G1 | Rbbp5   | retinoblastoma binding protein 5                         |                                                                                                                                                                                                                                            |                                                                                                                                                                                                  | VLVCPMK,VTTGTSNTTAK                                                                                                                 |
| IPI00551482.3 | P97868 | Rbbp6   | Isoform 1 of Retinoblastoma-binding protein 6            |                                                                                                                                                                                                                                            |                                                                                                                                                                                                  | GYQVPVLGTPSLLGQSLLHGQLIPT<br>TGPVR,LNYDVTFTDGLHISLCDLK,<br>AMMSQSGHEYDPINYMK                                                        |
| IPI00122698.1 | Q60973 | Rbbp7   | Histone-binding protein RBBP7                            | LNVDLSK,TPSSDVLVFDYTK,TVAL<br>WDLR                                                                                                                                                                                                         | HPAKPDPSGECNPDRL,TPSSDV<br>LVFDYTK,TVALWDLR,NTPFLYDL<br>VMTHALQWPSLTVQWLPEVTKP<br>EGK,DYALHWLVLTGHTSDEQNH<br>LVVAR,VINEEYK                                                                       | LNVDLSK,IECEIK,HPAKPDPSGE<br>CNPDLR,TPSSDVLVFDYTK,NTPFL<br>YDLVMTHALQWPSLTVQWLPEVTK<br>PEGK,GEFGGFGSVTGK,VINEEYK                    |
| IPI00116031.3 | Q99KG3 | Rbm10   | Isoform 1 of RNA-binding protein 10                      | GFAFVEFSLQDATR,YGGISTASVDF<br>EQPTR,ESATADAGYAILEK,AHLSENE<br>LEALEK,KYGGISTASVDFEQPTR,NLN<br>PHSTMSILGALAPYAVLSSSNVR,WM<br>EANQHSLNILGQK                                                                                                  | GFAFVEFSLQDATR,QNLEIHR                                                                                                                                                                           |                                                                                                                                     |
| IPI00404707.1 | Q8C2Q3 | Rbm14   | Isoform 1 of RNA-binding protein 14                      |                                                                                                                                                                                                                                            | INVELSTK,AIEALHGHEL RPGR,K<br>GPALAIQSGDK,ALVEMSR                                                                                                                                                |                                                                                                                                     |
| IPI00340815.3 | Q0VBL3 | Rbm15   | RNA binding motif protein 15                             | SEEDYLVMIIVR,NSNFPSNMHLLQGD<br>LQVASSLLVEGSGGK,LWVGGLGPW<br>VPLAALAR,ISELGSQLSDEAVEDGLFH<br>EFK                                                                                                                                            | LWVGGLGPWVPLAALAR,SDGNA<br>PSASTSSK                                                                                                                                                              |                                                                                                                                     |
| IPI00170394.1 | Q8JZX4 | Rbm17   | Splicing factor 45                                       | NMVGAGEVDEDELEVETK,QSTVLAPVI<br>DLK,SDSNPLTEILK                                                                                                                                                                                            |                                                                                                                                                                                                  |                                                                                                                                     |

|               |          |        |                                                      |                                                                                                                                                         |                                                                                                                          |                                           |
|---------------|----------|--------|------------------------------------------------------|---------------------------------------------------------------------------------------------------------------------------------------------------------|--------------------------------------------------------------------------------------------------------------------------|-------------------------------------------|
| IPI00421119.5 | B2RY56   | Rbm25  | Isoform 1 of RNA-binding protein 25                  | LLAEGHPDPAELQR,QEPESEEEEEEE<br>KQEKEEK                                                                                                                  | LLHDLQIGEK,GAIEVLIR,LLAEGH<br>PDPDAELQR,EKEAAYQER,RFPV RFPVAPLIPYPLITK,FPVAPLIPYPLI<br>APLIPYPLITK,LGASNSPGQPNSV TK<br>K |                                           |
| IPI00828892.1 | Q5SFM8   | Rbm27  | Isoform 1 of RNA-binding protein 27                  | ELLDTLHDK,LQLGTPPPLAAR,EEI<br>KEEVFQEPAAEEER,FGTIVNIQVAFK,A<br>QTQRPNLIGLTSMDANPR                                                                       |                                                                                                                          |                                           |
| IPI00378187.2 | Q8BG13   | Rbm3   | Rbm3 protein                                         | LFVGGNLFNTDEQALEDHFSSFGPISE<br>VVVVK,GFGFITFTNPEHAMDAMR                                                                                                 |                                                                                                                          |                                           |
| IPI00136573.1 | Q9D3U4   | Rbm31y | MCG53108                                             | MFIGGLSQEMSK,MFIGGLSQEMSKQ<br>VLLEYLSK,SRGFGFVLFK,GFGFVLFK                                                                                              |                                                                                                                          |                                           |
| IPI00225915.2 | B2RUP0   | Rbm34  | RNA binding motif protein 34                         | VADGEALDVALSLAK,ESALASADLEE<br>ELHQDQGGQR,LAALFSTAEPSAPPVF<br>VPVPQETSK                                                                                 |                                                                                                                          |                                           |
| IPI00223371.2 | Q5RJ10   | Rbm39  | RNA binding motif protein 39                         | GIAYVEFVDVSSVPLAIGLTGQR,DLEE<br>FFSTVGK,IESIQLMMDSETGR,TDASS<br>ASSFLDSELER,GIFEPFGRIESIQLM<br>MDSETGR,MITAAYVPLPTYHNLFPDS<br>MTATQLLVPSR,ALEQLNGFELAGR | NSAQGNVYVK,VLGVPIIVQASQAE<br>K,CPSIAAAIAAVNALHGR                                                                         |                                           |
| IPI00130160.3 | Q91YE7   | Rbm5   | Isoform 1 of RNA-binding protein 5                   | ESAAADAGFALFEK,LSEQELEALELR,<br>GLPITITESDIR                                                                                                            |                                                                                                                          |                                           |
| IPI00279153.3 | Q8R388   | Rbm6   | Rbm6 protein                                         | GAGLGYSHPLGSSEEIEGR,FQUESTS<br>EGKPPLEDVFK,ILQNLDPFSDGK                                                                                                 |                                                                                                                          |                                           |
| IPI00410937.1 | Q9CWZ3-1 | Rbm8a  | RNA binding motif protein 8a isoform a               | MREDYDSVEQDGEPPGQR,SVEGWI<br>LFVTGVHEEATEEDIHDK,GYTLVEYET<br>YK                                                                                         |                                                                                                                          |                                           |
| IPI00223425.2 | Q8BP71   | Rbm9   | Isoform 1 of RNA-binding protein 9                   | ESEVELPVPAGADGPEPGLSK,GFG<br>FVTFENSADADR,TEEAADGGMQNEP<br>LTPGYHGFPAR                                                                                  |                                                                                                                          |                                           |
| IPI00118523.1 | Q9DAE2   | Rbmx12 | Putative uncharacterized protein                     | GFAFVTFENPADAK,IIEVLLMK,DFAPS<br>PR,LFIGGLNLETDEKGLTAFGK,RDP<br>YLGPR,LFIGGLNLETDEK,GLETAFGK,<br>GGSADGGYTGDFDLRPSR,VAQATK<br>PVFESGR,RGPPPPR           | GFAFVTFENPADAK,IIEVLLMK,R<br>DPYLGPR,LFIGGLNLETDEK,VAQ<br>ATKPVFESGR                                                     |                                           |
| IPI00663587.1 | Q91VM5   | Rbmxrt | RNA binding motif protein, X<br>chromosome retrogene | DVYLSR,RGPPPPR,DSYGGPPR,V<br>EQATKPSFESGR,ALEAVFGK,LFIGGL<br>NTETNEK,GFAFVTFESPADAK,REPLP<br>SR,DRDYSDHPSGGSYR                                          | VEQATKPSFESGR,REPLPSR                                                                                                    | PSFESGR,VEQATKPSFESGR,EPL<br>PSRR,REPLPSR |
| IPI00130885.1 | O35479   | Rbmxrt | Heterogeneous nuclear<br>ribonucleoprotein G         | DVYLSR,RGPPPPR,DSYGGPPR,Q<br>ERGLPPSMER,ALEAVFGK,LFIGGLNT<br>ETNEK,REPLPSR,GGYMDDGGYSMN<br>FNMSSSR,DRDYSDHPSGGSYR,IVEII<br>LMK                          | RGPPPPR,LFIGGLNTETNEK,AL<br>EAVFGK,REPLPSR,IVEIILMK                                                                      |                                           |
| IPI00464101.2 | Q4VGL6   | Rc3h1  | Roquin                                               | FGAISR,LELQQLNHQISQQTQLR                                                                                                                                |                                                                                                                          |                                           |

|               |        |        |                                                      |                                                                                                                                                                                                                                                                                 |
|---------------|--------|--------|------------------------------------------------------|---------------------------------------------------------------------------------------------------------------------------------------------------------------------------------------------------------------------------------------------------------------------------------|
| IPI00123762.2 | Q6PFB2 | Rcc1   | Regulator of chromosome condensation 1               | VVLTVSSGGQHTVLLVK,VVQVSA SHNTEPGLVLTGQQGDVGQLGLGE<br>GDSHTAALTEDGR,LGLGEGAE SVLER,VVQVSAGDSHTAALTEDGR<br>K,VFLWGSFR ,SMVPVQQLDAPVVK                                                                                                                                             |
| IPI00222509.1 | Q8BK67 | Rcc2   | Protein RCC2                                         | NHTLALTDTGSVFAFGENK,LPEY<br>TPR,LIEALSHEAIVLAACGR,GQL<br>LIFGATNWDLIGR,TLDGIFSEQVA<br>MGYSHSLVIAR,VAIFIEKTKDGGI YGCLSGVR,NLGQNLWGPFR,DVA<br>LPVPNVVVR,IEYDCELVPR,TVVS CGANHRTLVLDSQK,AAGAAAITEPE<br>GSCAAHSLITTEGK,VAIFIEK,DV HTK<br>ACGANHTLVLDSQK,RVAIFIEK,A<br>AGAAAITEPEHTK |
| IPI00137831.1 | Q05186 | Rcn1   | Reticulocalbin-1                                     | EEFTAFLHPEEFHMK,IDSDDGLVT<br>TEELK,QATYGYLGNPAEFHDSSDHH<br>TFK,NGDGFVDQDEYIADMFSHEDNG<br>PEPDWVLSER,EIVVLETLEDIDK,HWIL<br>PQDYDHAQAEAR,IVDRIDSDGDGLVT<br>TEELK,VVRPDELGERPPEDNQSFQ<br>YDHEAFLGK                                                                                 |
| IPI00474959.2 | Q3TE95 | Rcn2   | Putative uncharacterized protein                     | QLHDDYFYHDEL,EALLGVQEDVDEYV<br>K                                                                                                                                                                                                                                                |
| IPI00221798.1 | Q8BH97 | Rcn3   | Reticulocalbin-3                                     | EELTAFLHPEEFPHMR,DIVVAETLEDL<br>DK,MDLAGSDSGWVSLAELR,DIVVAE<br>TLEDLDKNK,FRVADQDGD SMATR                                                                                                                                                                                        |
| IPI00226581.1 | Q8C796 | Rcor2  | REST corepressor 2                                   | GLDSQLISLK,DFGAIAEVIGNK,YSNKE<br>LKGMLVWSPNHCVSDAK,REPLPSR                                                                                                                                                                                                                      |
| IPI00395067.1 | P19426 | Rdbp   | Isoform 1 of Negative elongation factor E            | MLVIPPGLSEEEEEALQK,GAFSPFGNII<br>DLSMDPPR,KGNTLYVYGEDMTPTLR<br>,MESADQAVAELNGTQVESVQLK,SV<br>WGSLAVQNSPK,ELGQDGEEAEAPGA<br>GDGPPR,GNTLYVYGEDMTPTLR,SL<br>SEQPVVDTATATEQAK                                                                                                       |
| IPI00653921.2 | Q3TS85 | Rdx    | radixin isoform a                                    | EVWFFGLQYVDSK,IAQDLEMYGVNYF<br>EIK,APDFVYFAPR,NQEQLAAELAEFT<br>AK,IGFPWSEIR,FFPEDVSEELIQEITQ<br>R<br>KTQNDVLHAENVK,EIHKPGYLAN<br>DR,QLERAQLENEKK,LFFLQVK,A<br>PDFVYFAPR,NQEQLAAELAEFTA<br>K,IGFPWSEIR,FVIKPIDK,RKPDIT<br>EVQQMK                                                 |
| IPI00311103.1 | Q9JJW6 | Refbp2 | Isoform 1 of RNA and export factor-binding protein 2 | SLGTADVHFER,QQLSAEELDAQLDAY<br>NAR,QQLSAEELDAQLDAYNARMDS,<br>QQLSAEELDAQLDAYNAR,LLVSNLDFG<br>VSDADIQELFAEFGTLK,LLVSNLDF<br>GVSDADIQELFAEFGTLK,MDMSLDD<br>IIK<br>LLVSNLDFGVSDADIQELFAEFGT<br>LK,LLVSNLDFGVSDADIQELFAE<br>GTLK                                                    |

|               |        |         |                                                        |                                                                                                                          |                                                                                                                                                                                                                                                                                                                                |
|---------------|--------|---------|--------------------------------------------------------|--------------------------------------------------------------------------------------------------------------------------|--------------------------------------------------------------------------------------------------------------------------------------------------------------------------------------------------------------------------------------------------------------------------------------------------------------------------------|
| IPI00120529.2 | Q5U4B1 | Rfc1    | Rfc1 protein                                           | GGIQELIGLIK,LTPTSVLDFYFGTESVQR<br>,GFYTSGAAPSVSARHALIMDEVDGM<br>AGNEDR,ILDEDGLLDLIR,DALVRPLTS<br>QGVGAQHVIK              |                                                                                                                                                                                                                                                                                                                                |
| IPI00665571.2 | Q8R323 | Rfc3    | Replication factor C subunit 3                         |                                                                                                                          | IEHQITITPSK,VPAPSIEDICSVLSTV<br>CR,YRPSSLAR                                                                                                                                                                                                                                                                                    |
| IPI00224572.4 | Q5CZW9 | Rg9mtd2 | RNA (guanine-9-) methyltransferase domain containing 2 | KEDLVYLTSDSPNVLK,EDLVYLTSDS<br>PNVLK                                                                                     |                                                                                                                                                                                                                                                                                                                                |
| IPI00315100.1 | Q9QUI0 | Rhoa    | Transforming protein RhoA                              |                                                                                                                          | TCLLIVFSK,DQFPEVYVPTVFENY<br>VADIEVDGK,LVIVGDGACGK                                                                                                                                                                                                                                                                             |
| IPI00626173.3 | Q6PR54 | Rif1    | Isoform 1 of Telomere-associated protein RIF1          |                                                                                                                          | FASDLIEPVTLDTPLSK,SQEDEISPV<br>SGSFINLLQLEELGFR,YAHTLIT NK,SLIDNFALNPDILCSAK,KPDLEN<br>AVHDSFVSVGK,TIGDLSTLTASEI VSSEGGGGTLDNLDK,LVIPLVVHS<br>K,MVSSIIIDSLEVILSK,IVLSLEPLE AQK,ATALVYPEELKPILR,VSFADPI<br>HPLISSPFFFSK,GEIHSVVDFEA YQAGLADDIDR,CVWSPLASPSTSIL<br>LNVIIR,SGSEVLTLLLK K,LPQCLLVQVASELGAESNTTSPE<br>K,SGSEVLTLLLK |
| IPI00471148.2 | Q9CQS5 | Riok2   | Serine/threonine-protein kinase RIO2                   | LTNAGYDYLALK,KEDSLDVEVSASGY<br>TK                                                                                        |                                                                                                                                                                                                                                                                                                                                |
| IPI00123915.1 | Q9WTV7 | Rlim    | LIM domain interacting RING finger protein             | NGRGSSGGGNSSGSSSSSSPSSS<br>GESSESSSK,DNNLLGTPGESTEEELL<br>R,MENSDSNDKGSQSAQRR                                            |                                                                                                                                                                                                                                                                                                                                |
| IPI00330736.5 |        | Rnf168  | ring finger protein 168                                | NSLVNTDLWEIIQK,VYHLLVEEEISDR                                                                                             |                                                                                                                                                                                                                                                                                                                                |
| IPI00133880.2 | Q9CQJ4 | Rnf2    | E3 ubiquitin-protein ligase RING2                      | TWELSLYELQR,SLHSELMCPICLDML<br>K,SLRPDPNFDALISK,TPQEAITDGLI<br>VVSRR                                                     |                                                                                                                                                                                                                                                                                                                                |
| IPI00313296.3 | Q91VI7 | Rnh1    | Ribonuclease inhibitor                                 |                                                                                                                          | DISSAVQANPALTELSLR,LSLQNCG<br>LTEAGCGILPGMLR,LGNAGIAALCP<br>GLLLPSCK                                                                                                                                                                                                                                                           |
| IPI00453849.3 | Q9D0L8 | Rnmt    | Isoform 1 of mRNA cap guanine-N7 methyltransferase     | SILIGEILEK,LEECHSSAVAAHYNELQE<br>VGLAK                                                                                   |                                                                                                                                                                                                                                                                                                                                |
| IPI00130664.5 | O89026 | Robo1   | Roundabout homolog 1                                   |                                                                                                                          | KGVNYEIK,TVTFQCEATGNPQPA<br>IFWRR                                                                                                                                                                                                                                                                                              |
| IPI00109401.1 | Q9D706 | Rpap3   | RNA polymerase II-associated protein 3                 | VLELEPDNFEATNELR,QDFETVLLLEP<br>GNK,RFDMAVMFMMSGPER,KELIEK,KL<br>TNVLFNHLEK,GMDADYPNPVLPNTNR,I<br>EAVSDTSAPQAQVGK        |                                                                                                                                                                                                                                                                                                                                |
| IPI00124511.1 | Q8VEE0 | Rpe     | Ribulose-phosphate 3-epimerase                         |                                                                                                                          | IGPSILNSDLANLGAELR,MLDSGA<br>DYLHLDVMDGHFVFNITFGHPVVES<br>LRK                                                                                                                                                                                                                                                                  |
| IPI00380313.3 | Q7TND5 | Rpf1    | Ribosome production factor 1                           | AAAFPPGFSISEIK,DFTDLIVINEDR,GK<br>DPTEHVPEIILNFTTR,DPTEHVPEIIL<br>NFTTR,VYDETTVDPNDEEVAYDEAT<br>DEFASYFNR,MFASLFPHPQFIGR |                                                                                                                                                                                                                                                                                                                                |

|               |        |        |                                    |                                                                                                                                                                           |                                                                                                                                                                               |                                                                                      |
|---------------|--------|--------|------------------------------------|---------------------------------------------------------------------------------------------------------------------------------------------------------------------------|-------------------------------------------------------------------------------------------------------------------------------------------------------------------------------|--------------------------------------------------------------------------------------|
| IPI00121159.3 | Q9JJ80 | rpf2   | Brix domain-containing protein 1   | NLLIDFFR,RPNNLVIGR,NISQDTFGTT<br>FGR,NITRPFEDQTSLEFFSK,MYDYHV<br>LDMIELGIEK,KPYGVLYK,GGNANATV<br>TQVLR,RPNNLVIGRMYDYHVLDMIEL<br>GIEK,IELEEMGPSLDLVMR,LAGLEYV<br>LHFTALNGK |                                                                                                                                                                               |                                                                                      |
| IPI00626239.3 |        | Rpl11  | Ribosomal protein L11              | YDGIIIPGK,KNNFSDTGNFGFGIIEHI<br>DLGIK,AEIIEK,VLEQLTGQTPVFSK                                                                                                               | YDGIIIPGK,IAVHCTVR,NNFSDT<br>GNFGFGIIEHIDLGIK,KNNFSDT<br>GNFGFGIIEHIDLGIK,YDPSIGY<br>GLDFYVVLGRPGFSIADK,PGFSI<br>ADK,KLCLNICVGESGDR,YDPSIG<br>IYGLDFYVVLGR,VLEQLTGQTPV<br>FSK | YDGIIIPGK,IAVHCTVR,PGFSIADK,<br>AEEIEK,YDPSIGYGLDFYVVLGR,<br>VLEQLTGQTPVFSK          |
| IPI00223217.6 | P19253 | Rpl13a | 60S ribosomal protein L13a         | YQAVTATLEEK,LAHEVGWK,GPYHFR,<br>GMLPHK,GHLLGRLLAAIVAKQVLLGR,R<br>GQAALER                                                                                                  | YQAVTATLEEK,LAHEVGWK,KFA<br>YLGR                                                                                                                                              | YQAVTATLEEK,LAHEVGWK,VLDGI<br>PPPYDK,GPYHFR,QVLLGRK,KFAY<br>LGR,MVPAALK,CEGINISGNFYR |
| IPI00890140.1 | Q569Z0 | Rpl14  | Ribosomal protein L14              | RYVEVGR,VAYISFGPHAGK,LVAIVDVI<br>DQNR,VAYISFGPHAGKLVAIVDVIDQN<br>R,AAIAAAAAAAAAAKAKVPAK                                                                                   |                                                                                                                                                                               |                                                                                      |
| IPI00473728.1 | Q9CWK0 | Rpl14  | Putative uncharacterized protein   | RYVEVGR,VAYISFGPHAGK,AAIAAAA<br>AAAAAK,LVAIVDVIDQNR,VAYISFGPH<br>AGKLVAIVDVIDQNR                                                                                          | RYVEVGR,VAYISFGPHAGK,AAIA<br>AAAAAAAK,LVAIVDVIDQNR,VA<br>YISFGPHAGKLVAIVDVIDQNR,AL<br>VDGPCTR                                                                                 | RYVEVGR,VAYISFGPHAGK,AAIAA<br>AAAAAAAK,ALVDGPCTR,CMQLTD<br>FILK                      |
| IPI00555113.2 | P35980 | Rpl18  | 60S ribosomal protein L18          | ILTFDQLALESPK,TNRPPLSLSR,APGT<br>PHSHTK,TAVVVGTVTDDVR,SQDIYLR<br>,GTVLLSGPR,RTNSTFNQVVLK,APGT<br>PHSHTKPYVR,TNSTFNQVVLK                                                   | ILTFDQLALESPK,TNRPPLSLSR,<br>SQDIYLR,TAVVVGTVTDDVR,GT<br>VLLSGPR,APGTPHSHTKPYVR,T<br>NSTFNQVVLK                                                                               | ILTFDQLALESPK,TNRPPLSLSR,TA<br>VVVVGTVTDDVR,GTVLLSGPR,TNST<br>FNQVVLK                |
| IPI00850221.1 |        | Rpl19  | Mus musculus ribosomal protein L19 | LASSVLR,VWLDPNETNEIANANSR,TL<br>SKEEETKK,HMYHSLYLK,LLADQAEA<br>R,ILMEHIHK,KEEIIK                                                                                          | VWLDPNETNEIANANSR,RLASSV<br>LR,LLADQAEAR                                                                                                                                      | VWLDPNETNEIANANSR,HMYHSLY<br>LK,LLADQAEAR,ILMEHIHK                                   |
| IPI00139780.1 | P62830 | Rpl23  | 60S ribosomal protein L23          | VHPAVVIR,LNRLPAAGVGDMMVATVK<br>,GSAITGPVAK,NLYIISVK,LPAAGVGD<br>MVMATVK,KDGVFLYFEDNAGVIVNNK<br>,DGVFLYFEDNAGVIVNNK,IASNAGSIA                                              | RKDGVFLYFEDNAGVIVNNK,GSA<br>ITGPVAK,NLYIISVK,LPAAGVGD<br>MVMATVK,ISLGLPVGAVINCADN<br>TGAK,DGVFLYFEDNAGVIVNNK,<br>KVHPAVVIR                                                    | VHPAVVIR,GSAITGPVAK,LPAAGV<br>GDMVATVK,ISLGLPVGAVINCAD<br>NTGAK,KVHPAVVIR            |
| IPI00323806.4 | Q3UW40 | Rpl24  | Putative uncharacterized protein   | VFQFLNAK,AITGASLADIMAK,GQSEEI<br>QK,KGQSEEIQK,QINWTVLYR                                                                                                                   | VFQFLNAK,AITGASLADIMAK,VE<br>LCSFSGYK                                                                                                                                         | AITGASLADIMAK,VFQFLNAK,CESA<br>FLSK,VELCSFSGYK,QINWTVLYR                             |
| IPI00230623.8 | P62911 | Rpl32  | 60S ribosomal protein L32          | GQILMPNIGYGSNK,AAQLAIR,KFLVH<br>NVK,ELEVLLMCNKSYCAEIAHNVS<br>FKGQILMPNIGYGSNK                                                                                             | ELEVLLMCNK,SYCAEIAHNVS<br>VSSK                                                                                                                                                | FLVHNVK,HMLPSGFR,SYCAEIAHN<br>VSSK                                                   |
| IPI00222550.8 | Q3U8M3 | Rpl37a | Putative uncharacterized protein   |                                                                                                                                                                           |                                                                                                                                                                               | YTCSFCGK,TVAGGAWTYNTTSAVT<br>VK                                                      |

|               |        |       |                                 |                                                                                                                                                                                                                                                                                                                                                   |                                                                                                                                                                                                                                                                                                                                                                                                                                                                                          |
|---------------|--------|-------|---------------------------------|---------------------------------------------------------------------------------------------------------------------------------------------------------------------------------------------------------------------------------------------------------------------------------------------------------------------------------------------------|------------------------------------------------------------------------------------------------------------------------------------------------------------------------------------------------------------------------------------------------------------------------------------------------------------------------------------------------------------------------------------------------------------------------------------------------------------------------------------------|
| IPi00111412.3 | Q9D8E6 | Rpl4  | 60S ribosomal protein L4        | SNYNLPMHK,EAVQLLK,IEEVPPELPLV<br>VEDK,GPCIIYNEDNGIIK,LEAAATALAT<br>K,RNTILR,KLDELYGTWR,GHRIEEVPE<br>LPLVVEDK,NIPGITLLNVSK,APIRPDIV<br>NFMHTNLRK,QPYAVSELAGHQTSAES<br>WGTGR,PLISVYSEK,IEEVPPELPLVVE<br>DKVEGYK,APIRPDIVNFMHTNLR,GHRI<br>EEVPELPLVVEDKVEGYK,NNRQPYAV<br>SELAGHQTSAESWGTGR,MMNTDLS<br>R,NIPGITLLNVSKLNILK,LDELYGTWR,<br>KLEAAATALATK | LAPGGHVGR,RGPCIIYNEDNGIIK<br>LAPGGHVGR,EAVQLLK,IEEVPPEL<br>,EAVQLLK,IEEVPPELPLVVEDK,GP<br>LVVEDK,GPCIIYNEDNGIIK,LEAAAT<br>CIIYNEDNGIIK,LEAAATALATK,YA<br>ALATK,RNTILR,YAICSALAASALPAL<br>ICSALAASALPALVMSK,KLDELY<br>VMSK,NVTLPAVFK,NIPGITLLNVSK,<br>GTWR,NIPGITLLNVSK,FCIWTES<br>FCIWTESAFR,QPYAVSELAGHQTS<br>AFR,PLISVYSEK,IEEVPPELPLVVE<br>AESWGTGR,APIRPDIVNFMHTNLR<br>DKVEGYK,APIRPDIVNFMHTNLR,<br>K,PLISVYSEK,APIRPDIVNFMHTNL<br>MMNTDLSR,KLEAAATALATK<br>R,LDELYGTWR,KLEAAATALATK |
| IPi00311236.1 | P14148 | Rpl7  | 60S ribosomal protein L7        | FKEANNFLWPFK,EANNFLWPFK,FGII<br>CMEDIHEIYTVGK,AGNFYVPAEPK,K<br>TTHFVEGGDAGNR,VPAVPETLK,VPA<br>VPETLKK,SVNELIYK,ASINMLR,TTHF<br>VEGGDAGNREDQINR,IALTDNSLIAR,<br>KAGNFYVPAEPK,GINGVSPK,LAFVIR,<br>TTHFVEGGDAGNR,KVLQLLR,IVEPYI<br>AWGYPNLK,KVATVPGTLK,KVATVPG<br>TLKK                                                                               | EANNFLWPFK,FGIICMEDIHEIY<br>TVGK,AGNFYVPAEPK,VPAVPET<br>LK,SVNELIYK,ASINMLR,TTHFVE<br>GGDAGNREDQINR,IALTDNSLIA<br>R,KAGNFYVPAEPK,GINGVSPK,K<br>LK,KVLQLLR,AGNFYVPAEPK,VPAV<br>PETLK,SVNELIYK,VATVPGTLK,IAL<br>TDNSLIAR,GINGVSPK<br>VPAVPETLK,KVLQLLR,IVEPYIA<br>WGYPNLK,KVPAVPETLKK                                                                                                                                                                                                      |
| IPi00111695.1 | Q9D8M4 | Rpl71 | 60S ribosomal protein L7-like 1 | IPLVPENLLK,TVPLTDNTVIEHLGR,T<br>VEPYVTWGFPNLK,LAFVIR,KIPLVPE<br>LLK                                                                                                                                                                                                                                                                               |                                                                                                                                                                                                                                                                                                                                                                                                                                                                                          |
| IPi00137787.3 | P62918 | Rpl8  | 60S ribosomal protein L8        | ASGNATVISHNPETK,GIVKDIHDPG<br>R,AVVGVVAGGGGR,DIIHDPGR,AQLNI<br>GNVLPVGTMPGEGTIVCCLEEKPGDR,K<br>GAGSVFR,IDKPILK,AQLNIGNVLPVGT<br>MPEGTIVCCLEEK                                                                                                                                                                                                     | ASGNATVISHNPETK,AVVGVVA<br>GGGR,RTOLFIAAEGIHTGQFVYC<br>GK,KVGLIAAR,DIIHDPGR,KGAG<br>SVFR,TELFIAAEGIHTGQFVYCG<br>K,IDKPILK                                                                                                                                                                                                                                                                                                                                                                |
| IPi00113377.1 | P47955 | Rplp1 | 60S acidic ribosomal protein P1 |                                                                                                                                                                                                                                                                                                                                                   | ALANVNIGSLICNVGAGGPAPAA<br>GAAPAGGAAPSTAAAPAEK,AA<br>GVSVEPFWPGFLFAK                                                                                                                                                                                                                                                                                                                                                                                                                     |
| IPi00139795.2 | P99027 | Rplp2 | 60S acidic ribosomal protein P2 | LASVPAGGAVAVSAAPGSAAPAAGSA<br>PAAAEKKDEK,KILDSVIEADDDRLN<br>K,LASVPAGGAVAVSAAPGSAAPAAG<br>SAPAAAEKK,ILDSVIEADDDRLNK,<br>KILDSVIEADDDR,ILDSVIEADDDR,<br>YVASYLLAALGGNSSPSAK,NIEDVIAQ<br>GVGK,LASVPAGGAVAVSAAPGSAAP<br>AAGSAPAAAEK,MRYVASYLLAALGG<br>NSSPSAK,KEESEESDDDMGFGLFD                                                                      | ILDSVIEADDDRLNK,YVASYLLA<br>ALGGNSSPSAK,NIEDVIAQGVGK<br>,LASVPAGGAVAVSAAPGSAAPA<br>AGSAPAAAEK<br>VAVSAAPGSAAPAAGSAPAAAEK,<br>NIEDVIAQGVGK                                                                                                                                                                                                                                                                                                                                                |



|               |        |        |                                                                              |                                                                                                                                                                                                                                                                                                                    |                                                                                                                                                          |
|---------------|--------|--------|------------------------------------------------------------------------------|--------------------------------------------------------------------------------------------------------------------------------------------------------------------------------------------------------------------------------------------------------------------------------------------------------------------|----------------------------------------------------------------------------------------------------------------------------------------------------------|
| IPI00309035.2 | Q91YQ5 | Rpn1   | Dolichyl-diphosphooligosaccharide--<br>protein glycosyltransferase subunit 1 | ISVVVETVYTHVLHPYPTQITQSE<br>K,VACITEQVLTLVNKR,TVDLSSH<br>LAK,AVTSEIAVLQSR,THYIVGYN<br>LPSYEYLYNLGDQYALK,APDELH<br>YTYLDTFGRPVIVAYK,NLVEQHIQ<br>DIVVHYTFNK,LPVALDPGSK,FVD<br>HVFDEQVIDSLTVK,TILPAAAQDV<br>YYR,VACITEQVLTLVNK,LKTEGS<br>DLCDR,ASSFVLALEPELESR,HF<br>DETVNR,VTAEVVLVHPGGGSTS<br>R,VIEVSHWGNIAVEENVDLK | LAHLGVQIK,TILPAAAQDVYYR,APD<br>ELHYTYLDTFGRPVIVAYKK,VACIT<br>EQVLTLVNK,AVTSEIAVLQSR,FPLF<br>GGWK,HFDETVNR                                                |
| IPI00889811.1 |        | Rpn2   | Putative uncharacterized protein                                             | FPEEEAPSTVLSQSLFTP,K,YHVP<br>VVVVPEGSTSDTQEQAILR,NPIL<br>Y SIVGLSSLGVQVPDVK,LQVSNV<br>LSQPLAQAAVK,YLAVLGTVTFLA<br>GNR,NIVEEIEDLVAR,YIANTVELR<br>,LGKEETVLATVQALQTASHLSQQ<br>ADLR,TPFSLVGNVFELNFK                                                                                                                   | EETVLATVQALQTASHLSQQADLR,<br>FPEEEAPSTVLSQSLFTP,K,YHVPV<br>VPEGSTSDTQEQAILR,NPILWNVA<br>D VVIK,LQVSNVLSQPLAQAAVK,AS<br>LDRPFTDLESAFYSIVGLSSLGVQV<br>PDVK |
| IPI00128066.1 | Q91WE3 | Rpp25  | Ribonuclease P protein subunit p25                                           | SEEAPAGDGDEGGSPNSGPFADLAP<br>GAVHMR,QLGYQPPNLSPGPSSPPTV<br>STSK,NLLAFATASMAQPATR                                                                                                                                                                                                                                   |                                                                                                                                                          |
| IPI00134346.1 | O88796 | Rpp30  | Ribonuclease P protein subunit p30                                           | YTISNALNLMQICK,GLGFELVYGPAIR,<br>EIEKPIAVSELF TTLPIVQGK,GLVETAA<br>HLGYSVVAINHIVDFK                                                                                                                                                                                                                                |                                                                                                                                                          |
| IPI00330367.5 | Q80UU2 | Rpp38  | Ribonuclease P protein subunit p38                                           | LAEGGQASAATLQPLK,EDIHFILQTL<br>AK,TQGPTDSLETPESESQDNEILDTS<br>FDDLTK                                                                                                                                                                                                                                               |                                                                                                                                                          |
| IPI00123724.1 | Q8VDS4 | Rprd1a | Regulation of nuclear pre-mRNA domain-<br>containing protein 1A              | LPNVTGSHMHLPFAGDIYSED,IASLPV<br>EVQEVSLLLEK,KLTFLYLANDVIQNSK,L<br>TFLYLANDVIQNSK                                                                                                                                                                                                                                   |                                                                                                                                                          |
| IPI00338515.4 | Q9CSU0 | Rprd1b | Isoform 1 of Regulation of nuclear pre-<br>mRNA domain-containing protein 1B | SHIQSLPDL SLLPNVTGGLAPLPSAGD<br>LFSTD,IASLPQEVQDVSLLEK,SVYGG<br>EFIQQLK,EFESVLVDAFSHVAR,KLTFL<br>YLANDVIQNSK,ALQDLENAASGDATV<br>R,LTFLYLANDVIQNSK                                                                                                                                                                  |                                                                                                                                                          |
| IPI00112448.1 | P63325 | Rps10  | 40S ribosomal protein S10                                                    | GPEGERPAR,SAVPPGADKKAEGAG<br>SATEFQFR,DYHLHLPPEIVPATLR,EGV<br>MVAK,GEADRDTYR,KAEAGAGSATEF<br>QFR,HPELADK,IAIYELLFK,EGVMVAK,<br>HFYWYLTNEGIQYLR,KDV HMPK,AEAGAGSATEFQFR                                                                                                                                             | DYHLHLPPEIVPATLR,KAEAGAGS<br>ATEFQFR,HPELADK,IAIYELLFK,<br>NVPNLHVMK,DYHLHLPPEIVPATLR,I<br>A IYELLFK,AEAGAGSATEFQFR                                      |

|               |        |        |                                        |                                                                                                                                              |                                                                                                                                  |                                                                                                      |
|---------------|--------|--------|----------------------------------------|----------------------------------------------------------------------------------------------------------------------------------------------|----------------------------------------------------------------------------------------------------------------------------------|------------------------------------------------------------------------------------------------------|
| IPI00117569.3 | Q9DB79 | Rps11  | Putative uncharacterized protein       | NIGLGFK,ILSGVVTK,DYLYHIR,TIVIR,VLLGETGK,RDYLHYIR                                                                                             | EAIEGTYIDKK,ILSGVVTK,DYLYHIR,VLLGETGK,DVQIGDIVTVGECRPLSK,EAIEGTYIDK,RDYLHYIR                                                     | NIGLGFK,CPFTGNVSIR,NMSVHLSPCFR,ILSGVVTK,DYLYHIR,QPTIFQNK,VLLGETGK,EAIEGTYIDK,RDYLHYIR,DVQIGDIVTVGECR |
| IPI00322562.5 | P62264 | Rps14  | 40S ribosomal protein S14              | ADRESSPYAAMLAQDVAQR,IEDVTPIPSDSTR,TKTPGPGAQSALR,ELGITALHIK,TPGPGAQSALR,DESSPYAAMLAQDVAQR                                                     | IEDVTPIPSDSTR,TKTPGPGAQSALR,ELGITALHIK,TPGPGAQSALR                                                                               | IEDVTPIPSDSTR,ELGITALHIK,TPGPGAQSALR                                                                 |
| IPI00319231.4 | P62843 | Rps15  | 40S ribosomal protein S15              | HGRPGIGATHSSR,TFNQVEIKPEMIGHYLGEFSITYKPKVK,KQHSLLK,KEAPPEKPEVVK,GVDLDQLDMSYEQLMQLYSAR,TFNQVEIKPEMIGHYLGEFSITYK,DMIIPEMVGSMVGVYNGK,PGIGATHSSR | TFNQVEIKPEMIGHYLGEFSITYKPKVK,KEAPPEKPEVVK,GVDLDQLDMSYEQLMQLYSAR                                                                  | HGRPGIGATHSSR,TFNQVEIKPEMIGHYLGEFSITYKPKVK,GVDLDQLDMSYEQLMQLYSAR,DMIIPEMVGSMVGVYNGK                  |
| IPI00465880.4 | P63276 | Rps17  | 40S ribosomal protein S17              | LLDFGSLSNLQVTQPTVGMNFK,LGNDFHTNKR,LGNDFHTNKR,RDNYVPEVSA LDQEIIIVDPDTK,VIIEK,DNYVPEVSA LDQEIIIVDPDTK                                          | LGNDFHTNKR,LLDFGSLSNLQVTQPTVGMNFK,VCEEIAIIPSK,LGNDFHTNKR,RDNYVPEVSA LDQEIIIVDPDTK,VCEEIAIIPSK,DNYVPEVSA LDQEIIIVDPDTK,IAGYVTHLMK |                                                                                                      |
| IPI00317590.5 | P62270 | Rps18  | 40S ribosomal protein S18              | HFWGLR,LREDLER,RYAHVVLRLIPDWFLNR,VITIMQNPR,YSQVLANGLDNKR,AGELTEDEVER,KADIDLTK,IAFAITAIK                                                      |                                                                                                                                  | VLNTNIDGR,YAHVVLRLIPDWFLNR,LFWGLR,FQHILR,VITIMQNPR,YSQVLANGLDNKR,KADIDLTK,IAFAITAIK                  |
| IPI00875584.1 |        | Rps19  | Rps19 protein                          | GGAGVGSMTK,IAGQVAAANK,VLQALEGLK,DVNQQEFVR,MVEKDQDGGRR,VLQALEGLK,DVNQQEFVRALAAFLKK,HKELAPYDENWFYTR,ELAPYDENWFYTR,LKVPEWVDTVK,HLYLR,ALAAFLK    | IAGQVAAANK,RVLQALEGLK,LKVPEWVDTVK                                                                                                | GGAGVGSMTK,IAGQVAAANK,VLQALEGLK,DVNQQEFVR,VPEWVDTVK,ELAPYDENWFYTR,NGVRPSHFSR                         |
| IPI00323819.3 | P60867 | Rps20  | 40S ribosomal protein S20              | TPVEPEVAIHR,LIDLHSPSEIVK                                                                                                                     | QITSISIEPGVEVEVTIADA,TPVEPEVAIHR,LIDLHSPSEIVK,VCADLIR                                                                            | TPVEPEVAIHR,LIDLHSPSEIVK,VCADLIR                                                                     |
| IPI00132950.1 | Q9CQR2 | Rps21  | 40S ribosomal protein S21              | MGESDDSILR,FNGQFK,ADGIVSK,DHASIQMNVAEVDR                                                                                                     | TYGICGAIR,RMGESDDSILR,MGESDDSILR,DHASIQMNVAEVDR                                                                                  |                                                                                                      |
| IPI00131357.7 | Q9CZI5 | Rps23  | Putative uncharacterized protein       | GHAVGDIPGVR,KGHAVGDIPGVR,KAHGLTALK,ANPFGGASHAK,VANVSLALYK                                                                                    | GHAVGDIPGVR,AHLGTALK,ITAFVPNDGCLNFIENDEVLVAGFGR,KGHAVGDIPGVR,ANPFGGASHAK,VANVSLALYK                                              | GHAVGDIPGVR,AHLGTALK,ANPFGGASHAK,QPNSAIR,ITAFVPNDGCLNFIENDEVLVAGFGRK,VANVSLALYK                      |
| IPI00465568.5 | Q9CQK2 | Rps24  | 40S ribosomal protein S24              | KFMTNR,QMVIDVLHPGK,HGLYEK,TTDPVIFVFGFR,KQMVIDVLHPGK,TTGFGMIYDSLIDYAK                                                                         | QMVIDVLHPGK,TTDPVIFVFGFR,TTGFGMIYDSLIDYAK                                                                                        | QMVIDVLHPGK,TTGFGMIYDSLIDYAK                                                                         |
| IPI00137735.1 | P62852 | Rps25  | 40S ribosomal protein S25              | DKLNNLVLFDK,AALQELLSK,LNNLVLFDK,LITPAVVSER,GSLARAALQELLSKGLIK                                                                                | DKLNNLVLFDK,AQVIYTR,AALQELLSK,LNNLVLFDK,LITPAVVSER                                                                               | AALQELLSK,LNNLVLFDK,LITPAVVSER                                                                       |
| IPI00124709.3 | Q6ZWY3 | Rps27I | 40S ribosomal protein S27-like protein | LVQSPNSYFMDVK,DLLHPSLEEEK                                                                                                                    | LVQSPNSYFMDVK,DLLHPSLEEEK,LTEGCSFR                                                                                               |                                                                                                      |

|               |        |         |                                              |                                                                                                                                                                                                                                                                        |                                                                                                                                                                                                                                      |                                                                                                                                                                                                                                                                    |
|---------------|--------|---------|----------------------------------------------|------------------------------------------------------------------------------------------------------------------------------------------------------------------------------------------------------------------------------------------------------------------------|--------------------------------------------------------------------------------------------------------------------------------------------------------------------------------------------------------------------------------------|--------------------------------------------------------------------------------------------------------------------------------------------------------------------------------------------------------------------------------------------------------------------|
| IPI00134599.1 | P62908 | Rps3    | 40S ribosomal protein S3                     | ELAEDGYSGVEVR,GGKPEPPAMPQP<br>VPTA,TQNVLGEK,LLGGLAVR,VTPT<br>TEIIILATR,FIMESGAK,KPLPDHVSIVE<br>PK,FVADGIFK,DEILPTTPISEQK,TEIIIL<br>ATR,FVDGLMIHSGDPVNYVDTAVR,<br>KPLPDHVSIVEPKDEILPTTPISEQK,KF<br>VADGIFKAELNEFLTR,FGFPEGSVELY<br>AEK,KFVADGIFK,AELNEFLTR,ELTAV<br>VQK | ELAEDGYSGVEVR,GGKPEPPAM<br>PQPVPPTA,GLCAIAQAESLR,LLGG<br>LAVR,KPLPDHVSIVEPK,FVADGI<br>FK,DEILPTTPISEQK,TEIIILATR,F<br>VDGLMIHSGDPVNYVDTAVR,F<br>GFPEGSVELYAEK,KFVADGIFK,A<br>ELNEFLTR,GCEVVVSGK,ELTAV<br>VQK                         | ACYGVLR,ELAEDGYSGVEVR,GGK<br>PEPPAMPQPVPPTA,GLCAIAQAESL<br>R,LLGGLAVR,TQNVLGEK,IMLPWD<br>PSGK,KPLPDHVSIVEPK,FVADGIFK<br>,DEILPTTPISEQK,FGFPEGSVELY<br>EK,AELNEFLTR,GCEVVVSGK,ELT<br>AVVQK                                                                          |
| IPI00331092.7 | P62702 | Rps4x   | 40S ribosomal protein S4, X isoform          | GNKPWISLPR,DANGNSFATR,GIPHLV<br>THDAR,HWMLDKLTGVFAPR,LTIAEE<br>R,HWMLDK,TDITYPAGFMDVISIDK,LS<br>NIFVIGK,ERHPGSFDVVHVK,YPDPLIK<br>,HPGSFDVVHVK,IGVITNR,LTGVFAPR<br>,VNDTIQIDLETGK,KIFVGTK                                                                               | GNKPWISLPR,GIPHLVTHDAR,LT<br>IAEER,LRECLPLIIFLR,LIYDTK,EC<br>LPLIIFLR,TDITYPAGFMDVISIDK,<br>LSNIFVIGK,ERHPGSFDVVHVK,Y<br>PDPLIK,HPGSFDVVHVK,YALTGD<br>EVK,YALTGDEVK,IGVITNR,FDT<br>GNLCMVTGGANLGR,LTGVFAPR<br>,VNDTIQIDLETGK,KIFVGTK | GNKPWISLPR,DANGNSFATR,GIPH<br>LVTHDAR,HWMLDKLTGVFAPR,LT<br>IAEER,LIYDTK,ECLPLIIFLR,TDITY<br>PAGFMDVISIDK,LSNIFVIGK,PWISL<br>R,DVISIDK,YPDPLIK,HPGSFDVVHV<br>K,YALTGDEVK,FDTGNLCMVTGGA<br>NLGR,IGVITNR,LTGVFAPR,HWML<br>DKLTGVFAPRPSTGPHK,VNDTIQID<br>LETGK,KIFVGTK |
| IPI00471047.2 | Q3V1Z5 | Rps4y2  | RIKEN cDNA 1110033J19                        | GNKPWISLPR,TDVAYPAGFMDVISIDK<br>,GIPHLVTHDAR,HWMLDKLTGVFAPR,<br>LTIAEER,HWMLDK,LSNIFVIGK,ERHP<br>GSFDVVHVK,ITDAIKFDTGNLCMVTG<br>GANLGR,YPDPLIK,HPGSFDVVHVK,Y<br>ALTGDEVK,IGVITNR,LTGVFAPR                                                                              |                                                                                                                                                                                                                                      |                                                                                                                                                                                                                                                                    |
| IPI00857345.1 |        | Rps5    | 20 kDa protein                               | LTNSMMMHR,WSTDDVQINDISLQD<br>YIAVK,HAFEIIHLLTGENPLQVLVNAIIN<br>SGPR                                                                                                                                                                                                    | TIAECLADELINAAK,KAQCPIVER,<br>RVNQAIWLLCTGAR,YLPHSAGR,<br>AQCPIVER,HAFEIIHLLTGENPLQ<br>VLVNAIINSGPR,VNQAIWLLCTGA<br>R                                                                                                                | TIAECLADELINAAK,YLPHSAGR,QA<br>VDVSPR,AQCPIVER,VNQAIWLLC<br>TGAR                                                                                                                                                                                                   |
| IPI00125521.3 | P97461 | Rps5    | 40S ribosomal protein S5                     | LTNSMMMHR,WSTDDVQINDISLQD<br>YIAVK,HAFEIIHLLTGENPLQVLVNAIIN<br>SGPR,GSSNSYAIK                                                                                                                                                                                          |                                                                                                                                                                                                                                      |                                                                                                                                                                                                                                                                    |
| IPI00648998.3 | Q505N6 | Rps6ka1 | ribosomal protein S6 kinase polypeptide<br>1 | FTLSGGNWNTVSETAK,GAMAATYSA<br>LNSSKPTPQLK,LPQSLSHQDLQLVK<br>,DLKPENILLDEEGHIK                                                                                                                                                                                          |                                                                                                                                                                                                                                      | TTQAPLHSVQQLHGK,KDEAILK,L<br>GMPQFLSTEASLLR                                                                                                                                                                                                                        |
| IPI00136984.1 | P62082 | Rps7    | 40S ribosomal protein S7                     | LTGKDVNFEPFQ,AAQNNVEHK,H<br>VVFIAQR,DVNFEPFQ,TLTAVHDAI<br>LEDLVFPSEIVGK,ELNITAAK,TLTAVH<br>DAILEDLVFPSEIVGK,IVKPNGEKPD<br>EFESGISQALLELEMNSDLK,VETFSG<br>VYK,AIIIFVVPQLK,KAIIFVVPQLK                                                                                   | HVVFIAQR,DVNFEPFQ,TLTAV<br>HDAILEDLVFPSEIVGK,ELNITAAK,I<br>VKPNGEKPDFESGISQALLELEMN<br>SDLK,ILPKPTR,AIIIFVVPQLK,VET<br>FSGVYK                                                                                                        | HVVFIAQR,DVNFEPFQ,TLTAV<br>HDAILEDLVFPSEIVGK,ELNITAAK,I<br>VKPNGEKPDFESGISQALLELEMN<br>SDLK,ILPKPTR,AIIIFVVPQLK,VET<br>FSGVYK                                                                                                                                      |

|               |        |        |                                                           |                                                                                                                                                                                                         |                                                                                                                  |                                                                                                                    |
|---------------|--------|--------|-----------------------------------------------------------|---------------------------------------------------------------------------------------------------------------------------------------------------------------------------------------------------------|------------------------------------------------------------------------------------------------------------------|--------------------------------------------------------------------------------------------------------------------|
| IPI00420726.3 | Q6ZWN5 | Rps9   | 40S ribosomal protein S9                                  | QVVNIPSFIVR,LFEGNALLR,LIGEYGLR,IGVLDEGKMKLDYILGLK,RLQTQVFK,MKLDYILGLK,SPYGGGRPGR,KQVVNIPSFIVR,IEDFLER,LDYILGLK,LIGEYGLR,LQTQVFK,KTYVTPR,RLQTQVFK,IGVLDEGK,RLDQELK,ELLTLDEK,IGVLDEGK                     | SPYGGGRPGR,KQVVNIPSFIVR,IEDFLER,LFEGNALLR,HIDFSLR,LDYILGLK,LIGEYGLR,LQTQVFK,KTYVTPR,RLQTQVFK,IGVLDEGK,MKLDYILGLK | QVVNIPSFIVR,IEDFLER,LFEGNALLR,HIDFSLR,LDYILGLK,LIGEYGLR,LQTQVFK,RLQTQVFK,ELLTLDEK,IGVLDEGK                         |
| IPI00120035.2 | Q149F1 | Rpusd2 | RNA pseudouridylate synthase domain-containing protein 2  | VLRQDPLPQDLVMFLHALR,QDPLPQDLVMFLHALR,QVPESGDQAQGGEGQLPSNGEQTPAPVADSGK,IDGIAEAAPQHLDTPEK                                                                                                                 |                                                                                                                  |                                                                                                                    |
| IPI00123602.2 | Q9JKY0 | Rqcd1  | Cell differentiation protein RCD1 homolog                 |                                                                                                                                                                                                         | LTSLGVIGALVK,TVATFILQK                                                                                           | LTSLGVIGALVK,VCNALALLQCVASHPETR                                                                                    |
| IPI00121149.1 | Q99PL5 | Rrbp1  | Isoform 3 of Ribosome-binding protein 1                   | VEPAVSSIVNSIQVLASK,LLATEQEDA<br>AVAK                                                                                                                                                                    |                                                                                                                  |                                                                                                                    |
| IPI00331302.4 | Q6NZB3 | Rrm1   | Ribonucleoside-diphosphate reductase                      |                                                                                                                                                                                                         | SAGGIGVAVSCIR,VIQGLYSGVTTVELDTLAAETAATLTTK,GAFIGQSQSLNIHIAEPNYGK,ALKEEEEEKER                                     | VIQGLYSGVTTVELDTLAAETAATLTTK,IAVSNLHK,RVLSGEFQIVNPHLLK                                                             |
| IPI00110856.2 | P56183 | Rrp1   | Isoform 1 of Ribosomal RNA processing protein 1 homolog A |                                                                                                                                                                                                         |                                                                                                                  | LAGNEQVTR,QIEQLELLTTEILNPSQAPSGVK                                                                                  |
| IPI00420344.1 | Q6P5B0 | Rrp12  | RRP12-like protein                                        |                                                                                                                                                                                                         | LSVLDLVALAPYSDEAAISK,APAHHPAAVSTAK,VAVVMDVVHLAK,LGFFTTYFLPLATTLK                                                 | VTVCQALR,AHINLVR,YQAGGSGIHRPVAK,AAQHGVCSVLK,IYDTLQWQIWTLLPGFCTRPTDVAASF,KGFFTTYFLPLATTLK,FFGTAVTCLLSPHSQVAAAATQTLK |
| IPI00133594.3 | Q9D1C9 | Rrp7a  | Ribosomal RNA-processing protein 7 homolog A              | KAGGHEESIPSPPGYSAVPVK,WISDYEDSVLDPEALR,AGGHEESIPSPPGYS<br>AVPVK,PVPGFQVAYVVFQK,MEVDAF<br>MEAYDK,TVELQEKPDLAESPTPEK                                                                                      |                                                                                                                  |                                                                                                                    |
| IPI00653834.2 |        | Rrp8   | Putative uncharacterized protein                          |                                                                                                                                                                                                         |                                                                                                                  | YLNEQLYSGPSSAAR,VALPALSENVHSSVPAQRPR                                                                               |
| IPI00128256.1 | Q91WM3 | Rrp9   | U3 small nucleolar RNA-interacting protein 2              | KTEEEEEEELEETAQEK,TEEEEEEELEETAQEK,FSSAGDFLVAGVGEHR,VWNAAENSYVETLFGHQDAVAALDALS<br>R                                                                                                                    |                                                                                                                  | RPLALQR,QLDPLCDIPLVGFINSLK,WNAAENSYVETLFGHQDAVAALDALS                                                              |
| IPI00318725.4 | Q9CYH6 | Rrs1   | Ribosome biogenesis regulatory protein homolog            | VEEAVVAR,DDTKEWLIEVPGSADPME<br>DQFAK,EWLIEVPGSADPMEQFAK,F<br>QPLFGDFAAEK,TNLVWDEASGQWR,<br>ELELEFDLGNLLASDR,ITVHKELELEF<br>DLGNLLASDR,DNTQLLINQLWR,QAG<br>PSPEAELR,VEELLAKAEQEEAEKLQR,<br>KFQPLFGDFAAEK |                                                                                                                  |                                                                                                                    |

|               |        |        |                                               |                                                                                                                                                                                                                                                                                                                                                                                    |                                                                                                                                                                                              |                                                                                                                                                                                                    |
|---------------|--------|--------|-----------------------------------------------|------------------------------------------------------------------------------------------------------------------------------------------------------------------------------------------------------------------------------------------------------------------------------------------------------------------------------------------------------------------------------------|----------------------------------------------------------------------------------------------------------------------------------------------------------------------------------------------|----------------------------------------------------------------------------------------------------------------------------------------------------------------------------------------------------|
| IPI00226149.6 | Q3UL54 | Rsl1d1 | Putative uncharacterized protein              | SKKATSLLTQSGGLASSAPAK,VPVSVN<br>LLAK,KALLATETPEASAPGTSKG,KAT<br>SLLTQSGGLASSAPAK,AVEVISNR,DEF<br>DSPEQTEGFYK,KPEASSFSTPR,LLG<br>SFEVFITDAR,GSASESPSASVAEATTT<br>DVQVTPTALLQLDR,SVSLPIFSSFVTS<br>QDENAVSLR,KDVQEFR,KVPVSVNLL<br>AK,KHGVNTISQIIPFK,KAVEVISNR,HG<br>VNTISQIIPFK,HFYQR,ALLATETPEAS<br>APGTSKG,IGHTGMETEHIVDNILAVSE<br>MLSEK,MQENITGK,RHLP SHIGR,ATS<br>LLTQSGGLASSAPAK | VPLPHSILSESSDVCLFTK,KAVEV<br>ISNR,ALLATETPEASAPGTSKG,K<br>PEASSFSTPR,LLGSFEVFITDAR                                                                                                           | SVSLPIFSSFVTSQDENAVSLR,HLP<br>SHIGR,KVPVSVNLLAK,HGVNTISQII<br>PFK,CITGTVLNISK,HFYQR,ALLATE<br>TPEASAPGTSKG,AVEVISNR,KASN<br>TPR,MQENITGK,GSASESPSASVAE<br>ATTTDVQVTPTALLQLDR,ATSLLTQ<br>SGLASSAPAK |
| IPI00469392.2 | Q99P72 | Rtn4   | Isoform 1 of Reticulon-4                      |                                                                                                                                                                                                                                                                                                                                                                                    | VPLLLPNVSALESQIEMGNIVKPK,<br>GSGSVDETLFALPAASEPVISSA<br>EKIMDLK,SPAASAPSLPPAAAVL<br>PSK                                                                                                      | KPAAGLSAAPVPPAAAPLLDFSSDS<br>VPPAPR,YSNSALGHVNSTIK,VPLLL<br>PNVSALESQIEMGNIVKPK,QPSWE<br>RSPAASAPSLPPAAAVLPSK,GPLP<br>AAPPTAPER,SPAASAPSLPPAAAV<br>LPSK                                            |
| IPI00856593.1 | Q3UJN2 | Ruvb1  | Putative uncharacterized protein              | PQGGQDILSMMGQLMK,EHVVEISELF<br>YDAK,EIIQDVTLHDLVDANAR,PQGGQ<br>DILSMMGQLMKPK,YSVQLLTPANLLA<br>K,LDPSIFESLQK,VEAGDVIYIEANSGA<br>VK,TALALAIQELGSK                                                                                                                                                                                                                                    | EACGVIVELIK,YSVQLLTPANLLA<br>K,AVLLAGPPGTGK,ILADQQDK,T<br>ALALAIQELGSK,ALESSIAPIVIF<br>ASNR                                                                                                  | PQGGQDILSMMGQLMKPK,YSVQL<br>LTPANLLAK,LDPSIFESLQK,TISHVII<br>GLK,AQTEGINISEEALNHLGEIGTK,<br>TALALAIQELGSK,GTEDITSPHGIP<br>LDLLDR                                                                   |
| IPI00123557.3 | Q9WTM5 | Ruvb2  | RuvB-like 2                                   |                                                                                                                                                                                                                                                                                                                                                                                    | GTEVQVDDIKR,DKVQAGDVID<br>K,IRCEEEDEVSEDAYTVLTR,T<br>QGFLALFSGDTGEIK,IKEETEIIEG<br>EVVEIQIDRPATGTGSK,MIESLTK<br>,LLIVSTSPYSEK,KGTEVQVDDIK<br>R,AVLIAGQPGTGK,AAGVVLEMIR<br>,EVVHTVSLHEIDVINSR |                                                                                                                                                                                                    |
| IPI00121427.1 | P14069 | S100a6 | Protein S100-A6                               |                                                                                                                                                                                                                                                                                                                                                                                    |                                                                                                                                                                                              | NKDQEVNFQEYVAFLGALALIYNEA<br>LK,DQEVNFQEYVAFLGALALIYNEA<br>LK,LQDAEIAR                                                                                                                             |
| IPI00129105.2 | Q9R1T2 | Sae1   | Isoform 1 of SUMO-activating enzyme subunit 1 |                                                                                                                                                                                                                                                                                                                                                                                    | TAPDYFLLQVLLK,YCFSEMAPVC<br>AVVGGILAQEIVK,NLILAGVK,VDT<br>EDVEK,VSQGVEDGPEAK,NDVF<br>DSLGISPDLLPDDFVR,GLTMLDH<br>EQVSPEDPGAQFLIQTGSVGR,E<br>ALEVDWSGEK                                       | KPESFFTK,NDVFDLGLISPDLLPDD<br>FVR                                                                                                                                                                  |
| IPI00605227.3 |        | Safb2  | MKIAA0138 protein                             | ADTVNQLHAFDDSK,EPVGLEEPVEQ<br>SSTAAQLPEATSQELVR,MAEPGTGS<br>GDPAFGPGASESGTRR,VTLADEEAP<br>MEPENEK,SEPVKEEGSELEQPFQA<br>TSSVGPDR,YGQDGVVILQSSQDR,NL<br>WVGLSSSTR                                                                                                                                                                                                                    |                                                                                                                                                                                              |                                                                                                                                                                                                    |

|               |        |          |                                                             |                                                                                                                                                                                                                                                   |                                                                                             |
|---------------|--------|----------|-------------------------------------------------------------|---------------------------------------------------------------------------------------------------------------------------------------------------------------------------------------------------------------------------------------------------|---------------------------------------------------------------------------------------------|
| IPI00342267.1 | Q6P5E3 | Sall1    | sal-like 1                                                  |                                                                                                                                                                                                                                                   | TSANPLTTLSSHLSQQLAVAAGLAQ<br>SLASQSANISGVK,LQQLVENIDK                                       |
| IPI00475164.2 | Q8BX22 | Sall4    | Isoform 1 of Sal-like protein 4                             | ANPQLLAEFQDK,TEATQPSTPQDISY<br>LPK                                                                                                                                                                                                                | KFTNAVMLQQHIR,ASNPALSLDALK<br>,VQVNMWAAHALHSGV,ALSSHVSQ<br>QVSVSQQVSAVALLSQK,LQQLVE<br>NIDK |
| IPI00875198.1 |        | Samhd1   | SAM domain- and HD domain-containing<br>protein 1 isoform 1 | LTDNIFLEVLHSTDPQLSEAQSILR,ISN<br>LIDIMITDAFLK,AEDFIVDVINVDYGME<br>DK,IAGSFLPFLDEDRLLEDLGVSSLEER                                                                                                                                                   |                                                                                             |
| IPI00225307.1 | Q8C483 | Sars     | Seryl-aminoacyl-tRNA synthetase,<br>isoform CRA_b           |                                                                                                                                                                                                                                                   | YLIATSEQPIAALHR,EAVGDDESVP<br>ENVLNFDDLADALAALK                                             |
| IPI00323674.6 | Q9Z315 | Sart1    | U4/U6.U5 tri-snRNP-associated protein<br>1                  | LASEYLSPEEMVTFK,TLGEIPTYGLAG<br>NR,KPDYLPYAEDESVDLLAQKPR,A<br>DDLLPLGDQTQDGFGR,TLGEDDP<br>WLDDTAAWIER,DLQGLTVEHAIDSFR,<br>GVLQDGEDVLVNVNMVVK,MSSSDTP<br>LGTVALLQEK,EPPVAADVINPMALR,Q<br>HQDFSASSTTILDEEPIVNR,EAGTKEE<br>PVAADVINPMALR,EEQEELMDFER |                                                                                             |
| IPI00136151.4 | P70122 | Sbds     | Ribosome maturation protein SBDS                            | VVESEDYSQQLEIVCLIDPGCFR,GSLE<br>VLSLKDVEEGDEKFE,DLDEVLQTHSV<br>FVNVSK                                                                                                                                                                             | DIHYSVKPNK,LTNVAVVR                                                                         |
| IPI00407413.2 | B2RPU8 | Scand3   | SCAN domain containing 3                                    |                                                                                                                                                                                                                                                   | RAPAAQPPAAAAPSAVGSPAAAP<br>R,APAAQPPAAAAPSAVGSPAAA<br>PR                                    |
| IPI00224219.1 | Q8BRF7 | Scfd1    | Isoform 1 of Sec1 family domain-<br>containing protein 1    |                                                                                                                                                                                                                                                   | FGQDIISPLLSVK,LEDIANAALAASA<br>VTQVAK                                                       |
| IPI00121931.1 | Q8VCA8 | Scrn2    | Secernin-2                                                  | GHQAALGLMEDEQEQAQQLR,GLLTG<br>EQTPPAQGLGSLFQAFVER                                                                                                                                                                                                 |                                                                                             |
| IPI00462855.3 | Q9EQC5 | Scyl1    | N-terminal kinase-like protein                              | DPFAPSRVAGVLGFAATHNLYSMDDC<br>AHK,GDPFAALSVR,LESVSEDPTQLA<br>EVEK                                                                                                                                                                                 |                                                                                             |
| IPI00659713.1 | Q3TKY6 | Sdccag10 | Peptidyl-prolyl cis-trans isomerase<br>SDCCAG10             | NFSLLSFGEEAEVEEVEVNR,TTAGDI<br>DIELWSK,SSHLLKDDPHLSSVPAVE<br>SEK,VEEGREEEEAAPDGAVAEYR,VT<br>GDTVYNMLR,ETAIKVEEGREEEEAAP<br>DGAVAEYR,DASMQSDTFEIIDPR,E<br>DQTLALLSQFK                                                                              |                                                                                             |
| IPI00123852.6 | Q9DCT5 | Sdf2     | Stromal cell-derived factor 2                               | AMEGIFMKPSELLR,HSSTDVLLSVTG<br>EQYGRPIGQK,HSSTDVLLSVTGEQY<br>GR,YGSGSGQQSVTVGTVSVDSDNSY<br>WR                                                                                                                                                     |                                                                                             |
| IPI00227657.6 | Q9ESP1 | Sdf2l1   | Stromal cell-derived factor 2-like protein<br>1             | FQHVGTSVFLSVTGEQYGNPIR,YGSG<br>SGQQSVTVGVEESDDANSYWR,AMEGI<br>FIKPGADLSTGHDEL                                                                                                                                                                     |                                                                                             |

|                |        |         |                                                                          |                                                                                                                                                    |                                                                                                                                                                                                                                                                                 |
|----------------|--------|---------|--------------------------------------------------------------------------|----------------------------------------------------------------------------------------------------------------------------------------------------|---------------------------------------------------------------------------------------------------------------------------------------------------------------------------------------------------------------------------------------------------------------------------------|
| IPI00117754.1  | Q61112 | Sdf4    | Isoform 1 of 45 kDa calcium-binding protein                              | NHEELKVDEETQEVLGNLR,QMIAIAD<br>ENQNHLEPEEILK                                                                                                       |                                                                                                                                                                                                                                                                                 |
| IPI00230351.1  | Q8K2B3 | Sdha    | Succinate dehydrogenase [ubiquinone] flavoprotein subunit, mitochondrial |                                                                                                                                                    | LGANSLDLVVFGR,TLNEADCAT<br>VPPAIR,AAFGLSEAGFNACLTAK,<br>AGLPCQDLEFVQFHPTGIYGAGC<br>LITEGCR,NTVIATGGYGR,KPFGE<br>HWR,GVIALCIEDGSIHR,VDEYDY<br>SKPIQGQK,ACALSIAESCRPGD<br>K,VSDAISTQYPVVDHEFDVAVVG<br>AGGAGLR,VTLEYRPVIDK,GEGGI<br>LINSQGER,ISQLYGDLEK,KHTLSY<br>VDIK,VGSVLQEGCEK |
| IPI00895251.1  | Q6PET3 | Sec11a  | Sec11a protein (Fragment)                                                |                                                                                                                                                    | GDLLFLTNR,VGEIVVFR                                                                                                                                                                                                                                                              |
| IPI00755905.1  | A2AIX1 | Sec16a  | SEC16 homolog A                                                          | GPSSEAAQEGDAQPYFSQSVGVR,ET<br>LSVDPFPLSDQIR,HSSNQEEAVGALD<br>FTLNR,IGNMWASPELK,PQELVGTFIQ<br>QEVGK,ADASLFPPASTPSSLPGLEVS<br>R                      |                                                                                                                                                                                                                                                                                 |
| IPI00123349.2  | Q01405 | Sec23a  | Protein transport protein Sec23A                                         |                                                                                                                                                    | GPVQVQPPPSNR,YIDTEHGGSQ<br>AR                                                                                                                                                                                                                                                   |
| IPI00377592.7  |        | Sec31a  | SEC31-like 1                                                             |                                                                                                                                                    | LSSSFGNLDPFGTGQPLPPLQIPQQ<br>SAQHSIVLPLK,KNEPIIK                                                                                                                                                                                                                                |
| IPI00226882.7  | P61620 | Sec61a1 | Protein transport protein Sec61 subunit alpha isoform 1                  |                                                                                                                                                    | IIEVGDTPK,GTLMELGISPIVTSGL<br>IMQLLAGAK,FSGNLLVSLGTWS<br>DTSSGGPAR,LFYTSNIPILQSAL<br>VSNLYVISQMLSAR                                                                                                                                                                             |
| IPI00315517.12 | Q3UP79 | Seh11   | unnamed protein product                                                  | DLIHDVSDFHGR,AETLMTVTPVHDI<br>AFAPNLGR                                                                                                             |                                                                                                                                                                                                                                                                                 |
| IPI00377727.8  | Q80TS8 | Sel13   | Isoform 1 of SEL1-like repeat-containing protein KIAA0746                |                                                                                                                                                    | CTEVQDISSYAATVQVGGER,LALE<br>LMK,AVKRLSGVDGLHQISSAIFLM<br>DSSCCGYHK                                                                                                                                                                                                             |
| IPI00109326.1  | Q9EP97 | Senp3   | Sentrin-specific protease 3                                              | AFQMLLYSK,SGGGFGPDPGSGTTVP<br>TR,HLALSQPFSTQQDMPK,ETIQGT<br>GSWGPEPPGPGTYSNPR,SLVLQLIQ<br>SYQR,LGLLGALMAEDGMR,GSPPVPS<br>GPPMEEDGLR,LEDIFQQEFSTPSR |                                                                                                                                                                                                                                                                                 |
| IPI00309089.6  | P42209 | Sept1   | septin 1                                                                 | FIEEQFEQYLR,STLINSFLTNLYEDR                                                                                                                        |                                                                                                                                                                                                                                                                                 |
| IPI00454142.5  | Q8C1B7 | Sept11  | Isoform 1 of Septin-11                                                   |                                                                                                                                                    | AAAQLLQSQAQQSGAQQTK,DDS<br>YKPIVEYIDAQFEAYLQEELK                                                                                                                                                                                                                                |
| IPI00114945.1  | P42208 | Sept2   | Septin-2                                                                 | STLINSFLTDLYPER,QQPTQFINPET<br>PGYVGFANLPNQVHR,ASIPFSVVGSN<br>QLIEAK,TMLITHMQDLQEVTDLHYE<br>NFR,TIISYIDEQFER                                       | STLINSFLTDLYPER,ASIPFSV<br>GSNQLIEAK,ILDEIEHSIK,TIISYI<br>DEQFER,TVQIEASTVEIEER<br>HIIDNR,QQPTQFINPETPGYVGFAN<br>LPNQVHR,YLHDESGLNR                                                                                                                                             |

|               |          |          |                                                                        |                                                                                                                                                                                                                                                                        |                                                                                                                                                                                                                |                                                                                                                                                                                                                          |
|---------------|----------|----------|------------------------------------------------------------------------|------------------------------------------------------------------------------------------------------------------------------------------------------------------------------------------------------------------------------------------------------------------------|----------------------------------------------------------------------------------------------------------------------------------------------------------------------------------------------------------------|--------------------------------------------------------------------------------------------------------------------------------------------------------------------------------------------------------------------------|
| IPI00224626.3 | Sept7    |          | cell division cycle 10 homolog                                         | LPLAVVGSNTIIEVNGK,ILEQQNSSR,S<br>TLINSLFLTDLYSPEYPPGPSHR,NLEGY<br>VGFANLPNQVYR                                                                                                                                                                                         | LKDSEAE LQR,ILEQQNSSR,STLI<br>NSLFLTDLYSPEYPPGPSHR,NLEG<br>YVGFANLPNQVYR                                                                                                                                       |                                                                                                                                                                                                                          |
| IPI00457611.2 | Q80UG5   | Sept9    | Isoform 1 of Septin-9                                                  | NEKAPMEFGYVVGIDSILEQMR,ITADLL<br>SNGIDVYPQK,QAPASRNEKAPMEFG<br>YVVGIDSILEQMR,APMEFGYVVGIDSILE<br>QMRR,VVNIVPIAK,APMEFGYVVGIDSILE<br>LEQMR,STLINTLFLK,LNEGNSAMANGI<br>EKEPEAQEM,DITSNIHFAYR,QGFEF<br>NIMVVGQSGLGK,ITADLLSNGIDVYPQ<br>KEFDEDAEDR,THMQNIKDITSNIHFEA<br>YR |                                                                                                                                                                                                                |                                                                                                                                                                                                                          |
| IPI00471476.1 | Q9CY58-2 | Serbp1   | Isoform 2 of Plasminogen activator inhibitor 1 RNA-binding protein     | TDKSSASAPDVDDPEAFPALA,DELTD<br>LDQSNVTEETPEGEEHPVADTENKEN<br>EVEEVK,FDQLFDDESDFPEVLK,ENE<br>VEEVKEEGPK,GEGGEFSVDRPIIER,P<br>ANDITSQLEINFGDLGR,KPANDITSQLE<br>EINFGDLGR,DELTDLDQSNVTEETPE<br>GEEHPVADTENK,SSASAPDVDDPEA<br>FPALA                                        | RFEKPLEEK,KNPLPPSVGVADKK<br>,KEETQPPVALKK,SEEHAEDSV<br>MDHHFR,RPDQQLQGDGK,VEFN<br>IR,FDQLFDDESDFPEVLK,GEGG<br>EFSVDRPIIER,KPANDITSQLEINF<br>GDLGR,KPNEGADGQWK,SAQA<br>AAQTNSNAAGK,EETQPPVALK,E<br>AGGGGVGGPGAK | RFEKPLEEK,RPDQQLQGDGK,GGG<br>GSHNWGTVK,FDQLFDDESDFPEV<br>LK,KEAGGGGVGGPGAK,GEGGEF<br>SVDRPIIER,KPANDITSQLEINFGDL<br>GR,KEETQPPVALK,KPNEGADGQ<br>WK,NPLPPSVGVADK,SSFHYSGL<br>K,SAQAAAQTNSNAAGK,KNPLPP<br>SVGVADK,FEKPLEEK |
| IPI00471475.1 | Q9CY58   | Serbp1   | Isoform 1 of Plasminogen activator inhibitor 1 RNA-binding protein     | TDKSSASAPDVDDPEAFPALA,GGSG<br>SHNWGTVKDELTESPK,FDQLFDDES<br>DPFEVLK,ENEVEEVKEEGPK,GEGGE<br>FSVDRPIIER,PANDITSQLEINFGDLGR<br>,KPANDITSQLEINFGDLGR,SSASAPD<br>VDDPEAFPALA                                                                                                | RFEKPLEEK,KNPLPPSVGVADKK<br>,RPDQQLQGDGK,SEEHAEDSV<br>MDHHFR,KEETQPPVALKK,VEFN<br>IR,FDQLFDDESDFPEVLK,GEGG<br>EFSVDRPIIER,KPANDITSQLEINF<br>GDLGR,KPNEGADGQWK,SAQA<br>AAQTNSNAAGK,EETQPPVALK,E<br>AGGGGVGGPGAK | RFEKPLEEK,RPDQQLQGDGK,GGG<br>GSHNWGTVK,FDQLFDDESDFPEV<br>LK,KEAGGGGVGGPGAK,GEGGEF<br>SVDRPIIER,KPANDITSQLEINFGDL<br>GR,KEETQPPVALK,KPNEGADGQ<br>WK,SSFHYSGLK,NPLPPSVGVAD<br>K,SAQAAAQTNSNAAGK,KNPLPP<br>SVGVADK,FEKPLEEK |
| IPI00136642.1 | P32261   | Serpinc1 | Antithrombin-III                                                       | VAEGTQVLELPPFKGDDITMVLILPKPE<br>K,NDNDNIFLSPLSISTAFAMTK,VAEGT<br>QVLELPPFK,GDDITMVLILPKPEK                                                                                                                                                                             |                                                                                                                                                                                                                |                                                                                                                                                                                                                          |
| IPI00880252.1 | Q5U4D0   | Serpinh1 | serine (or cysteine) proteinase inhibitor, clade H, member 1 precursor | LRDEEVHTGLGELLR,LSSLIILMPHHV<br>EPLER,DNQSGSLLFIGR,DQAVENILL<br>SPLVVASSLGLVSLGGK,LFYADHPFIF<br>LVR,HLAGLGLTEAIDK,LYGPSSVSFA<br>DDFVR                                                                                                                                  | SALQSINEWASQTDDGK,DQAVENI<br>LLSPLVVASSLGLVSLGGK,SYTVGV<br>TMMHR,LYGPSSVSFADDFVR                                                                                                                               |                                                                                                                                                                                                                          |
| IPI00886248.1 | Q8CFT2   | Setd1b   | Isoform 1 of Histone-lysine N-methyltransferase SETD1B                 |                                                                                                                                                                                                                                                                        | TGPLASPVLLETGLPLPLPLPLPL<br>ALPVPVLR,RSPPSMLSLDGPLVR                                                                                                                                                           |                                                                                                                                                                                                                          |
| IPI00116284.4 | Q64213   | Sf1      | Isoform CW17 of Splicing factor 1                                      | VMIPQDEYPEINFGVLLIGPR,HTLITEM<br>VALNPDFKPPADYKPPATR,AYIVQLQI<br>EDLTR,DGQMLPGEDEPLHALVTANT<br>MENVK                                                                                                                                                                   | VMIPQDEYPEINFGVLLIGPR,AYI<br>VQLQIEDLTR,FQRPQDPQSAQD<br>K<br>ILRPWQSSETR,TVIPGMPTVIPPL<br>TR,FQRPQDPQSAQDK,KDGMPLP<br>GEDEPLHALVTANTMENVK                                                                      |                                                                                                                                                                                                                          |



|               |        |       |                                           |                                                                                                                               |                                                                                                                                                                                                                                                                        |                                                                                                                                                                             |
|---------------|--------|-------|-------------------------------------------|-------------------------------------------------------------------------------------------------------------------------------|------------------------------------------------------------------------------------------------------------------------------------------------------------------------------------------------------------------------------------------------------------------------|-----------------------------------------------------------------------------------------------------------------------------------------------------------------------------|
| IPI00408796.3 | Q8K4Z5 | Sf3a1 | Splicing factor 3 subunit 1               |                                                                                                                               | ASKPLPPAPAPDEYLVSPITGEK,<br>EPPPEFEFIADPPSISAFDLDVVK,<br>VQAQVIQETIVPK,TQQAQANITL<br>QEQIEAIHK,IGEEEEIQKPEEK,LTA<br>QFVAR,LQYEGIFIK,EVLDQVCYR                                                                                                                          | ASKPLPPAPAPDEYLVSPITGEK,VQ<br>AQVIQETIVPK                                                                                                                                   |
| IPI00380281.4 |        | Sf3a2 | splicing factor 3a, subunit 2             | WQYLLMAAEPYETIAFK,MEKPPAPPS<br>LPAGPPGVK,QLALETIDINKDPYFMK,<br>NHLGSYECKLCLTLHNNEGSYLAHTQ<br>GK,DTEMGQQSLLFQIDYPEIAEGIMP<br>R |                                                                                                                                                                                                                                                                        |                                                                                                                                                                             |
| IPI00137848.1 | Q9D554 | Sf3a3 | Splicing factor 3A subunit 3              | SLESLDTSLFAK,WDNGTFPGWPK,W<br>QPDTEEEYEDSSGNVVK                                                                               |                                                                                                                                                                                                                                                                        |                                                                                                                                                                             |
| IPI00623284.4 | Q99NB9 | Sf3b1 | Splicing factor 3B subunit 1              |                                                                                                                               | AIGPHDVLATLLNNLK,AFAVVASA<br>LGIPSLPFLK,KMVMETIEK,EFG<br>AGPLFNQILPLMSPTLEDQER,V<br>KPYLPQICGTVLWR,ICFELLELLK,<br>IVQQIAILMGCAILPHLR,LLVDVDE<br>STLSPEEQK,TISALAIALAEAAT<br>PYGIESFDSVLKPLWK,GDTPGHA<br>TPGHGGATSSAR,ILVVIEPLIDE<br>DYYAR,VGAAEISR,SLVEIEHGL<br>VDEQQK | VVNGAAASQPPSK,AIGPHDVLATLL<br>NNLK,TEILPPFFK,AFAVVASALGIP<br>SLLPFLK,GDTPGHATPGHGGATSS<br>AR,VKPYLPQICGTVLWR,QQAADLI<br>SR,IWDTPSHTPAGAATPGR,LSS<br>WDQAETPGHTPSLR,VGAAEISR |
| IPI00349401.3 | Q3UAI4 | Sf3b2 | Putative uncharacterized protein          |                                                                                                                               | VGEPVALSEEEER,GIEKPPFELPD<br>FIK,KPGDLSDELRL,LIHGDLYE<br>GK                                                                                                                                                                                                            | GELQLPPPPPPGHYGAWAAQELQA<br>R,GIEKPPFELPDFIK                                                                                                                                |
| IPI00122011.2 | Q921M3 | Sf3b3 | Isoform 1 of Splicing factor 3B subunit 3 |                                                                                                                               | FSNTGEDWYVLVGVAK,ELAAEM<br>AAAFLNENLPESIFGAPK,AEVIMN<br>YHVGTVLSLQK,KFVIHPESNNLI<br>IETDHNAYTEATK,IVILEYQPSK,L<br>TISSPLEAHK,LGAVFNQVAFPLQ<br>YTPR,TPVEEVPAAIAPFQGR,FLA<br>VGLVDNTVR,IHQETF GK                                                                         | ELAAEMAAAFLNENLPESIFGAPK,Q<br>QEIVVSR,IVPGQFLAVDPK,LTISSP<br>LEAHK,HIANYISGIQTIGHR,TPVEE<br>VPAAIAPFQGR,LGAVFNQVAFPLQ<br>YTPR,IHQETF GK                                     |
| IPI00311948.3 | Q923D4 | Sf3b5 | Splicing factor 3B subunit 5              |                                                                                                                               | YTIHSQLEHLQSK,YIGTGHADTTK<br>,MLQPSGPPADKPEEN                                                                                                                                                                                                                          |                                                                                                                                                                             |
| IPI00454015.2 | Q8CH02 | Sf4   | Splicing factor 4                         | LTVENIGYQMLMK,DIDASPSPLSVQD<br>LK,FIADGGPEVETIALQNNR,EWAEQL<br>TQMGR,FANDGSFLQQFLK,WGPEED<br>KVELPPAELAQR                     |                                                                                                                                                                                                                                                                        |                                                                                                                                                                             |
| IPI00118286.1 | O70456 | Sfn   | 14-3-3 protein sigma                      | DSTLIMQLLR                                                                                                                    | NLLSVAYK,YLAEVATGDDK,DSTL<br>IMQLLR,LGLALNFSVFHYEIANSP<br>EEAISLAK,SAVEKGEELSCEER,L<br>AEQAER                                                                                                                                                                          | NLLSVAYK,GVCDTVLGLLDSHLIK,T<br>TFDEAMADLHTLSEDSYK,DSTLIM<br>QLLR,YLAEVATGDDKK,LAEQAER                                                                                       |

|               |        |          |                                                         |                                                                                                                                                                                                                                                                                                                                                                                                                                                                                                                                                                                 |
|---------------|--------|----------|---------------------------------------------------------|---------------------------------------------------------------------------------------------------------------------------------------------------------------------------------------------------------------------------------------------------------------------------------------------------------------------------------------------------------------------------------------------------------------------------------------------------------------------------------------------------------------------------------------------------------------------------------|
| IPI00129430.1 | Q8VIJ6 | Sfpq     | Splicing factor, proline- and glutamine-rich            | NLSPYVSNELLEEAQFGPIER,LFVG NLSPYVSNELLEEAQFGPIER,<br>NLPADITEDEFKRPVIVEPLEQLDDED FATHAAALSVR,ANLSLLR,LFVGN NLSPYVSNELLEEAQFGPIER,FA<br>GLPEK,DAKDKLESEMEDAYHEHQAN LPADITEDEFKRPVIVEPLEQLDD THAAALSVR,ANLSLLR,PVIVEPLEQ<br>LLR,ALAEIAKAELEDDTPMR,ISDSEGFK EDGLPEK,QHHAPYHQHHQGP LDEDGLPEK,QHHAPYHQHHQGP<br>ANLSLLR,LFVGNLPADITEDEFK,DKLE PPGGPGPR,YGEPGEVFINK,LFV PPPGGPGPR,YGEPGEVFINK,LFV<br>SEMEDAYHEHQANLLR,FAQHGTFEY GNLPADITEDEFK,FGQGGAGPV GNLPADITEDEFK,FGQGGAGPVGG<br>EYSQR,TEEKISDSEGFKANLSLLR,RM GGQGP,FAQHGTFEYEYSQR,A QGPR,ISDSEGFK<br>EELHSQEMQKR,AVVIVDDR VVIVDDR |
| IPI00848672.1 |        | Sfrs11   | splicing factor, arginine/serine-rich 11 isoform 2      | ALIVVPYAEGVIPDETK,LNHVAAGLVSPSLK,FHDPDSAVVAQHLTNTVFVDR LNHVAAGLVSPSLK,ALIVVPYAEGVIPDETK                                                                                                                                                                                                                                                                                                                                                                                                                                                                                         |
| IPI00314984.4 | Q3UYX6 | Sfrs13a  | Putative uncharacterized protein                        | YGPIVDVYVPLDFYTR,GFAYVQFEDV YGPIVDVYVPLDFYTR,GFAYVQFEDVR                                                                                                                                                                                                                                                                                                                                                                                                                                                                                                                        |
| IPI00405760.2 | Q8CH09 | Sfrs14   | Putative splicing factor, arginine/serine-rich 14       | VGMIPAPK,TLTSPDLAMALETNLS LCR                                                                                                                                                                                                                                                                                                                                                                                                                                                                                                                                                   |
| IPI00474430.1 | Q8C671 | Sfrs2    | Putative uncharacterized protein                        | YGRPPDSHHSR,VGDVYIPR VDNLTYSR,VGDVYIPR                                                                                                                                                                                                                                                                                                                                                                                                                                                                                                                                          |
| IPI00129323.1 | P84104 | Sfrs3    | Isoform Long of Splicing factor, arginine/serine-rich 3 | AFGYYGPLR,NPPGFVFEFEDPR AFGYYGPLR,NPPGFVFEFEDPR, VYVGNLGNNGNK                                                                                                                                                                                                                                                                                                                                                                                                                                                                                                                   |
| IPI00607076.1 | Q542V3 | Sfrs4    | splicing factor, arginine/serine-rich 4                 | NEGVIEFVSYSMDK,NGYGFVEFDDLR QAGEVTYADAHK,LIVENLSSR                                                                                                                                                                                                                                                                                                                                                                                                                                                                                                                              |
| IPI00314709.1 | O35326 | Sfrs5    | Splicing factor, arginine/serine-rich 5                 | GFGFVEFEDPR,LNEGVEFASYGDLK                                                                                                                                                                                                                                                                                                                                                                                                                                                                                                                                                      |
| IPI00222763.1 | Q8BL97 | Sfrs7    | Isoform 1 of Splicing factor, arginine/serine-rich 7    | NPPGFVFEFEDPR GHYAYDCHR,RPFDPNDR,VYVG GHYAYDCHR,RPFDPNDR,VELSTG MPR<br>NLGTGAGK,NPPGFVFEFEDPR                                                                                                                                                                                                                                                                                                                                                                                                                                                                                   |
| IPI00132340.1 | Q9D0B0 | Sfrs9    | Splicing factor, arginine/serine-rich 9                 | KEDMEYALR,VLVSGLPSPSGWQDLK, EKDLEDLFYK,IYVGNLPSDVR,DLEDL FYK,DGMGMVEYLR                                                                                                                                                                                                                                                                                                                                                                                                                                                                                                         |
| IPI00115454.3 | Q99JR1 | Sfxn1    | Sideroflexin-1                                          | VGIPVTDENGTR,SGDAPLTVNELG TAYVSATTGAVATALGLNALT                                                                                                                                                                                                                                                                                                                                                                                                                                                                                                                                 |
| IPI00127358.1 | Q91VW3 | Sh3bgrl3 | SH3 domain-binding glutamic acid-rich-like protein 3    | IQYQLVDISQDNALRDEM, IQYQLVDI SQDNALR                                                                                                                                                                                                                                                                                                                                                                                                                                                                                                                                            |
| IPI00312752.3 | Q62419 | Sh3gl1   | Endophilin-A2                                           | ALYDFEPENDGELGFR,ELGGESNFG DALLDAGESMK,EVAETSMHNLLETDI EQVSQLSALVDAQLDYHR                                                                                                                                                                                                                                                                                                                                                                                                                                                                                                       |
| IPI00849830.1 |        | Shb      | src homology 2 domain-containing transforming protein B | GAEHLSLLYPVAVR,VTIPALAAQFNG NEK                                                                                                                                                                                                                                                                                                                                                                                                                                                                                                                                                 |
| IPI00125298.2 | P98083 | Shc1     | Isoform p66 of SHC-transforming protein 1               | KQMLPPPPCPGR,HGSFVNKPTR,K PCSRPLSSILGR                                                                                                                                                                                                                                                                                                                                                                                                                                                                                                                                          |
| IPI00608017.1 | Q8R0X9 | Shmt1    | serine hydroxymethyltransferase 1                       | SALRPSGLR,ALSDALTELYGK,IQ SAVATLR SALRPSGLR,VLEACSIACNK,AVLE ALGSLNKK,ALSDALTELYGK,VAH FIHR                                                                                                                                                                                                                                                                                                                                                                                                                                                                                     |

|               |        |          |                                                                       |                                                                                                       |                                                                                                                                                                                                                                                                                                                                         |                                                                                                               |
|---------------|--------|----------|-----------------------------------------------------------------------|-------------------------------------------------------------------------------------------------------|-----------------------------------------------------------------------------------------------------------------------------------------------------------------------------------------------------------------------------------------------------------------------------------------------------------------------------------------|---------------------------------------------------------------------------------------------------------------|
| IPI00454008.1 | Q99K87 | Shmt2    | Serine hydroxymethyltransferase                                       | ISATSIFFESMPYK,AHLLADMAHISGL<br>VAAK,GYSLVSGGTDTHLVLDLRPK,L<br>NPQTGLIDYDQLALTAR,VVDFIDEGVN<br>IGLEVK | VLELVSITANK,LIIAGTSAYAR,GY<br>SLVSGGTDTHLVLDLRPK,LNPQ<br>TGLIDYDQLALTAR,INFAVFPSLQ<br>GGPHNHAIAAVAVALK,LGAPALT<br>SR,VVDFIDEGVNIGLEVK,YADV<br>TTTTHK                                                                                                                                                                                    | AALGALGSLNNK,LNPQTGLIDYD<br>QLALTAR,YADVTTTTHK                                                                |
| IPI00117932.2 | Q60520 | Sin3a    | Isoform 1 of Paired amphipathic helix protein Sin3a                   | AFLEILHTYQK,SEQATEENAGVPVGP<br>HLSLAYEDK                                                              |                                                                                                                                                                                                                                                                                                                                         |                                                                                                               |
| IPI00453688.1 | Q8C0T5 | Sipa111  | Isoform 1 of Signal-induced proliferation-associated 1-like protein 1 |                                                                                                       |                                                                                                                                                                                                                                                                                                                                         | KPEGTINSVGFMDTRK,ASFFAASD<br>ENHRPLSAASNSDQLEEQALVQMK<br>,VVIIPPHDDCTPRR,EHWNYFGADE<br>NLGPVAVSIR,QDPVVHLSPNK |
| IPI00134988.1 | Q923E4 | Sirt1    | NAD-dependent deacetylase sirtuin-1                                   |                                                                                                       |                                                                                                                                                                                                                                                                                                                                         | AVGSSTADK,VRPVALIPSSIPHEVP<br>QLINR,MADEVALALQAAGSPSAAA<br>AMEAASQPADEPLR                                     |
| IPI00113134.1 | Q9CZU3 | Skiv212  | Superkiller viralicidic activity 2-like 2                             |                                                                                                       | GIVILMVDEK,IVIPNEENVVIYK,<br>GEMQVVPVLVHLLSAISTVR,KMV<br>EEVFNNAIIDCLSDDEKK,GSADPL<br>NSAFHLTYNMVNLNLLR                                                                                                                                                                                                                                 |                                                                                                               |
| IPI00331163.9 | Q9WTX5 | Skp1a    | S-phase kinase-associated protein 1                                   |                                                                                                       | LQSSDGEIFEVDVEIAK,VDQGTL<br>FELILAANYLDIK                                                                                                                                                                                                                                                                                               |                                                                                                               |
| IPI00137194.1 | P53986 | Slc16a1  | Monocarboxylate transporter 1                                         |                                                                                                       | AAQSPQQHSSGDPTEESPV,EG<br>KEDEASTDVDEKPK                                                                                                                                                                                                                                                                                                |                                                                                                               |
| IPI00230754.5 | Q9CR62 | Slc25a11 | Mitochondrial 2-oxoglutarate/malate carrier protein                   |                                                                                                       | LGIYTVLFR,YEGFFSLWK                                                                                                                                                                                                                                                                                                                     |                                                                                                               |
| IPI00135651.1 | Q9QXX4 | Slc25a13 | Calcium-binding mitochondrial carrier protein Aralar2                 |                                                                                                       | ASFANEDGQVSPGSLLAGAIA<br>MPAASLVTPADVIK,DVEVTKEEF<br>ALAAQK,SSPQFGVTLTYELLQR,<br>DGSVPLLAEIFAGGCAGGSQVIFT<br>NPLEIVK,ITLPAPNPDHVGGYK,P<br>FLLQLAESAYR,LQVAGEITTGPR,<br>LTVNDFVR,ASGDAARPFLQLAE<br>SAYR,LAVATFAGIENK,FGQVTP<br>MEVDILFQLADLYEPR,YEGFFGL<br>YR,FGLGSIAGAVGATAVYPIDLV<br>K,TVELLSGVVDQTK,RADPAELK,<br>GEVTFEDVK,KIYSTLAGNR | FGLGSIAGAVGATAVYPIDLVK,FGL<br>YLPLFKPSASTSK                                                                   |
| IPI00115564.5 | P48962 | Slc25a4  | ADP/ATP translocase 1                                                 | YFPTQALNFAFK,GMGGAFVLVLYDEI<br>KK                                                                     | YFAGNLASGGAAGATSLCFVYPL<br>DFAR,GNLANVIR,GMGGAFVLV<br>YDEIK,YFPTQALNFAFK,LLLQVQ<br>HASK,GIIDCVVR,TAVAPIER,GA<br>WSNVLR,GMGGAFVLVLYDEIKK,<br>DFLAGGIAAAVSK,AAYFGVYDTA<br>K                                                                                                                                                               | YFAGNLASGGAAGATSLCFVYPLD<br>FAR,GNLANVIR,YFPTQALNFAFK,L<br>LLQVQHASK,TAVAPIER,GAWSNV<br>R,DFLAGGIAAAVSK       |

|               |        |          |                                                                     |                                                                  |                                                                                                                                                                                                                                                                                                            |
|---------------|--------|----------|---------------------------------------------------------------------|------------------------------------------------------------------|------------------------------------------------------------------------------------------------------------------------------------------------------------------------------------------------------------------------------------------------------------------------------------------------------------|
| IPI00127841.3 | P51881 | Slc25a5  | ADP/ATP translocase 2                                               | YFPTQALNFAFK,GMGGAFVLVLYDEI<br>KK                                | YFAGNLASGGAAGATSLCFVYPL<br>DFAR,GMGGAFVLVLYDEIK,AA<br>FGIYDTAK,GIIDCVVR,TAVAPIER,<br>GLYQGFNVSVQGIIYR,GAWSNV<br>FAR,GNLANVIR,DFLAGGVAAAISK,<br>LR,GMGGAFVLVLYDEIKK,GNLA<br>YFPTQALNFAFK,LLLQVQHASK,TA<br>NVIR,EQGVLSFWR,DFLAGGVAA<br>VAPIER,GAWSNVLR,GLGDCLVK<br>AISK,LLLQVQHASK,YFPTQALNF<br>AFK,GLGDCLVK |
| IPI00120769.3 | Q9JIM1 | Slc29a1  | Isoform 1 of Equilibrative nucleoside transporter 1                 |                                                                  | IVFIPLMLCNVK,WLPVLVASR,ALA<br>DPTVALPAR                                                                                                                                                                                                                                                                    |
| IPI00884508.1 | Q6GTI3 | Slc2a1   | solute carrier family 2 (facilitated glucose transporter), member 1 |                                                                  | RTLHLIGLAGMAGCAVLMTIALAL<br>FLLINR,TPEELFHPLGADSQV,FIIGV<br>LER,FLLINR,TPEELFHPLGADSQ<br>YCGLTTGFVPMYVGEVSPTALR,TF<br>V,VTILELFR<br>DEIASGFR                                                                                                                                                               |
| IPI00134191.3 | P32037 | Slc2a3   | Solute carrier family 2, facilitated glucose transporter member 3   |                                                                  | GPAGVELNSMQPVK,EEDQATEIL<br>QR,KEEDQATEILQR,QVTVLELFR<br>,TFEDIAR                                                                                                                                                                                                                                          |
| IPI00123279.1 | Q922Q5 | Slc35b3  | Adenosine 3'-phospho 5'-phosphosulfate transporter 2                |                                                                  | LIPVMLGGVFIQ GK,TYMLIAFLT VGT<br>MGLSNTSLGYLNYPTQVIFK,NPVG<br>TYGYAFLFSLTGYFGISFVLALIK                                                                                                                                                                                                                     |
| IPI00114641.2 | Q60849 | Slc3a2   | CD98 heavy chain                                                    |                                                                  | EEDTSLKLENLSLNPYEGLLLQFP<br>FVA,GQNEP GSLLTQFR,SIHILD<br>LTPNYQQNAWFLPAQADIVATK<br>,LGASNLPAGISLPASAK,LLLSTD<br>GLVLGPIHK,GQNEP GSLLTQFR,L<br>SAR,EALSSWLQDGVDFQFR,S<br>GASNLPAGISLPASAK,LLLSTD SAR,<br>HLEYLSTLK,YLVLNFR,NQKDEI<br>IGDLQAFVGR<br>NETDLK,LENLSLNPYEGLLLQFP<br>FVA,IGDLQAFVGR               |
| IPI00880321.1 |        | Slc4a1ap | 83 kDa protein                                                      | LDEKETFESLVAK,ETKSHESISQLSQ<br>VEQSK,LFILQGPEEDR,VLDLTLGLLR      |                                                                                                                                                                                                                                                                                                            |
| IPI00109311.3 | P70441 | Slc9a3r1 | Isoform 1 of Na(+)/H(+) exchange regulatory cofactor NHE-RF1        | LLVVDKETDEFFK,AVDPDSPAEASGL<br>R,QVSTEPSSTSSSSDPILDNLISLAV<br>AK |                                                                                                                                                                                                                                                                                                            |
| IPI00331076.4 | O54988 | Slk      | Isoform 1 of STE20-like serine/threonine-protein kinase             | LIQSEEINDTHIQTMDLVSQETGEK,EA<br>DFQAVDNEVGLTK                    |                                                                                                                                                                                                                                                                                                            |
| IPI00229571.1 | Q8CH25 | Sltm     | Isoform 1 of SAFB-like transcription modulator                      | TTQEFVEAEAIEDR,KQEADELSGDAS<br>VEDDSFVK,FPDTASVQSSFER            |                                                                                                                                                                                                                                                                                                            |
| IPI00221882.1 | Q8BHJ9 | Slu7     | Pre-mRNA-splicing factor SLU7                                       | QRPDDPMASFLGQ,NPDEVSYAGDNF<br>VR,FTGTNIAPDEHVQPQLMFDYD GK        |                                                                                                                                                                                                                                                                                                            |

|               |        |         |                                                                                                            |                                                                                                                                                                                                                                                                                                                                             |                                                                                                                                                                                                                  |                                                                                                       |
|---------------|--------|---------|------------------------------------------------------------------------------------------------------------|---------------------------------------------------------------------------------------------------------------------------------------------------------------------------------------------------------------------------------------------------------------------------------------------------------------------------------------------|------------------------------------------------------------------------------------------------------------------------------------------------------------------------------------------------------------------|-------------------------------------------------------------------------------------------------------|
| IPI00460668.2 | Q3TUD7 | Smarca4 | Putative uncharacterized protein                                                                           |                                                                                                                                                                                                                                                                                                                                             | GLDPVEILQER,ILTGTDAPK,GLQ<br>SYYAVAHAVTER,FNVLLTTYEYII<br>K,VDLNEEETILIIIR,LTQVLNTHYV<br>APR,AIEEGTLEEIEEEVVR,AGGLG<br>LNLQSADTVIIFDSDWNP HQDLQ<br>AQDR,ATNHKVVLLFCQMTSLMTIM<br>EDYFAYR,LAYLLQQTDEYVANLT<br>ELVR |                                                                                                       |
| IPI00396739.1 | Q91ZW3 | Smarca5 | SWI/SNF-related matrix-associated actin-dependent regulator of chromatin subfamily A member 5              |                                                                                                                                                                                                                                                                                                                                             | IAFTIEWIEPPKR,LDSIVIQQGR,LL<br>NILMQLR,FITDNTVEER,YLVIDEA<br>HR,LFELLEK,VLIFSQMTR,LVDQ<br>NLNK,LRLDSIVIQQGR                                                                                                      | APFHQLR,IMAQUIER,LVDQNLNK,MS<br>SAVEPPPPPPESAPSKPSAAGAG<br>GSSSGNK                                    |
| IPI00125662.2 | P97496 | Smarcc1 | Isoform 1 of SWI/SNF complex subunit SMARCC1                                                               | GGTVADLDEQDEEAVTTGGKEDEDP<br>SK,SLVALLVETQMK,PNIYLIPDIDLK,S<br>PQVPAAQQMLNFPEK,VHAFLEQWGL<br>VNYQVDPEER,GGTVADLDEQDEEAV<br>TTGGK,VREEVPLELVEAHVK,GGTVA<br>DLDEQDEEAVTTGGKEDEDP SKGDP<br>SR,TPEIYLAYR,LRHFEELETIMDR,HF<br>EELETIMDR,EKPIDLQNFGLR,KVEHEI<br>SEGNVATAAAAALASAATK,FWESPDT<br>VSQLDVSR,TLAGLVVQLLQFQEDAFG<br>K,DMEDPTVPNIIEEVLPK | HLAAVEER,SLVALLVETQMK,FW<br>ESPDTVSQLDSVR,VHAFLEQWGL<br>LVNYQVDPEER,TLAGLVVQLLQF<br>QEDAFGK,AGGTLCHILGAAYK,V<br>REEVPLELVEAHVK                                                                                   | HVTNPAFTK,HLAAVEER,SPQVPAA<br>QQMLNFPEKNKEK,KVEHEISEGNV<br>ATAAAAALASAATK,KASANSRK,AG<br>GTLCHILGAAYK |
| IPI00121270.5 | Q61466 | Smarcd1 | Isoform 2 of SWI/SNF-related matrix-associated actin-dependent regulator of chromatin subfamily D member 1 | ELVPESQAYMDLLAFER,PVIIQALWQY<br>IK,MTPQGPSMGPPGYGGNPSVR,LLG<br>IHTQTRPVIIQALWQYIK,SLVIELDKDL<br>YGPDNHLVEWHR,LHALLMPPEPIINH<br>VISVDPNDQK                                                                                                                                                                                                   |                                                                                                                                                                                                                  |                                                                                                       |
| IPI00119892.1 | O54941 | Smarce1 | SWI/SNF-related matrix-associated actin-dependent regulator chromatin subfamily E member 1                 | AYHNSPAYLAYINAK,KDEESIPMETEE<br>THLEDTAESQQNGEESTPDK,KFL<br>ESTDSFNNEK,KLEAELLQIEER,LISEI<br>LSESVVPDVR,DLTDEEKQEYLNEYEA<br>EK,FLESTDSFNNEK,LEAELLQIEER,<br>FLESTDSFNNEK,IAAEIAQAEQAR                                                                                                                                                       |                                                                                                                                                                                                                  |                                                                                                       |
| IPI00606586.2 | Q3ULS2 | Smc2    | Putative uncharacterized protein                                                                           | DNSTATALEVVAGER,IVNLQEVLS<br>ENK,LYIAYQFLR                                                                                                                                                                                                                                                                                                  | VAQNLVGPDNVHVALSLVDYKPE<br>LQK,IVNLQEVLSENEK,LYIAYQFL<br>R                                                                                                                                                       | ILATIEDLDQK,FPNLQFAYK,KNLAS<br>EETKR                                                                  |
| IPI00132122.3 | Q9CW03 | Smc3    | Structural maintenance of chromosomes protein 3                                                            | GSGSQSSVPSVDQFTGVGIR,SIMELM<br>NVLELR,AELGTDLLSLSLEDQK                                                                                                                                                                                                                                                                                      |                                                                                                                                                                                                                  |                                                                                                       |

|               |        |        |                                                     |                                                                                                                                                                                 |                                                                                                                                                                                                                                                                                                                                                                                                           |
|---------------|--------|--------|-----------------------------------------------------|---------------------------------------------------------------------------------------------------------------------------------------------------------------------------------|-----------------------------------------------------------------------------------------------------------------------------------------------------------------------------------------------------------------------------------------------------------------------------------------------------------------------------------------------------------------------------------------------------------|
| IPI00229397.1 | Q8CG47 | Smc4   | Structural maintenance of chromosomes protein 4     | ELEANVLTAPDR,FTQLDLEDVQVR,N<br>AQFIIISLR,VVTLQGQIIEQSGTMSGGG<br>SK                                                                                                              | SHGIDL DHNR,FTQLDLEDVQVR,<br>LLEENVSVFK,LPQTQQELK,EALI<br>TASETLK,NAQFIIISLR,YDIAISSC<br>CHALDYIVVDSIDTAQECVNFLK,V<br>LDIIIEK,VIQENEHALQK,FSCIIG<br>PNGSGK,HNTAVSLSK,RVEILN<br>EHR                                                                                                                                                                                                                        |
| IPI00129918.1 | P97801 | Smn1   | Survival motor neuron protein                       |                                                                                                                                                                                 | AAPWTSFLPPPPMPGSLGPGPK<br>GLK,CSAVWSEDGCIYPATITSIDFK<br>R                                                                                                                                                                                                                                                                                                                                                 |
| IPI00221714.1 | Q8BGT7 | Smndc1 | Survival of motor neuron-related-splicing factor 30 | DLLSTQPSETLASSDSFASTQPTHSW<br>K,DLQEVIETK,AQLQQVEAALSGNGE<br>NEDLLK                                                                                                             |                                                                                                                                                                                                                                                                                                                                                                                                           |
| IPI00648499.1 |        | Smtn   | 103 kDa protein                                     | LESMNDVEELTLLR                                                                                                                                                                  |                                                                                                                                                                                                                                                                                                                                                                                                           |
| IPI00331342.6 | Q3UKJ7 | Smu1   | Isoform 1 of WD40 repeat-containing protein SMU1    |                                                                                                                                                                                 | AAIAQALAGEVSVVPPSR,DVEEE<br>KFPTQLSR                                                                                                                                                                                                                                                                                                                                                                      |
| IPI00321581.4 | Q9ERB0 | Snap29 | Synaptosomal-associated protein 29                  | IDSNLDELSVGLGHLK,MSQKHINSIK,S<br>YNPFDDDDVEEEDTRPAPWK,SVFGGFI<br>NYFK,LDVNIKSTEEK                                                                                               |                                                                                                                                                                                                                                                                                                                                                                                                           |
| IPI00271440.4 | Q9Z0F7 | Sncg   | Gamma-synuclein                                     | TKEQANAVSEAVVSSVNTVANK,TVEE<br>AENIVVTTGVVR                                                                                                                                     |                                                                                                                                                                                                                                                                                                                                                                                                           |
| IPI00123129.1 | Q78PY7 | Snd1   | Staphylococcal nuclease domain-containing protein 1 | PLYDIPYMFEAR,NLPGLVQEGEPFSE<br>EATLFTK,SEAVVEYVFGSGR,DIQNTQ<br>CLLNVEHLSASCPHVTLQFADSK,DTN<br>GENIAESLVAEGLATR,LRPLYDIPYMF<br>EAR,VITEYLNAQESAK,PVFTVTEITDDL<br>HFYVQDVETGTQLEK | GDVGLGLVK,VLPAQATEYAFAFI<br>QVPQDEDAR,DVQIILESCHNQNL<br>LGTILHPNGNITELLLK,DIQNTQC<br>LLNVEHLSASCPHVTLQFADSK,S<br>SHYDELLAAEAR,ALLLPGHHLVT<br>VMLSGIK,MVLSGCAIIVR,ELVQ<br>R,SEAVVEYVFGSGR,NLPGLVQE<br>GEPFSEEATLFTK,NDISSHPPVE<br>GSYAPR,TCATVTIGGINIAEALVS<br>K,EGLVMVEVR,RGEFCIAK,DTNG<br>ENIAESLVAEGLATR,EVCFTIENK<br>,VITEYLNAQESAK,VMQVLNADAI<br>VVK,VHVFYIDYGNR,SAYYKPLLS<br>AEEAAK,ETCLITFLLAGIECPR |

|               |          |          |                                                                      |                                                                                                                                                                                                                                                                                                                                                                                                                                                                                                                                                                                                                                                        |                                                                                                                                                                                                                                                                                         |
|---------------|----------|----------|----------------------------------------------------------------------|--------------------------------------------------------------------------------------------------------------------------------------------------------------------------------------------------------------------------------------------------------------------------------------------------------------------------------------------------------------------------------------------------------------------------------------------------------------------------------------------------------------------------------------------------------------------------------------------------------------------------------------------------------|-----------------------------------------------------------------------------------------------------------------------------------------------------------------------------------------------------------------------------------------------------------------------------------------|
| IPI00420329.1 | Q6P4T2   | Snrnp200 | Small nuclear ribonucleoprotein 200                                  | LIVLDEIHELLHDDRGPVLEALVAR,<br>TLVEDLFADK,TICAEFAILR,GLIEII<br>SNAAEYENIPPIR,SGGPVWVLVQL<br>ER,LATYGITVAELTGDHQLCK,M<br>WQSMCPLRQFRK,TNLLLQAHLS<br>R,LTADILTTCAADIQR,GNIISTPE<br>K,LIGLSATLPNYEDVATFLR,DIDA<br>FWLQR,DILCGAADEVLAFLK,IVA<br>LSSSLNAK,ETYEVLVLSFIQAALG<br>DQPR,VLLTGETSTDLK,AIFEIVL<br>NR,INVLLQAFISQLK,EEGWVVVI<br>GDAK,NQVLVVFVHSR,EEISATQII<br>VCTPEK,LYDLNHNEIGELIR,TGN<br>FQVTELGR,LIVLDEIHELLHDDR,EI<br>DLLLGQTDDDR,YAQDEHLITFFV<br>PVFEPLPPQYFIR,FYDDAIVSQK,<br>TYTQLVR,HLILPEK,YPNIELSYEV<br>VDKDSIR,DTLGLFLR,LVEQLFSS<br>GAIQVVVASR,MIDKRMWQSMCP<br>LR,NALLQLTDSQIADVAR,KADEV<br>LEILK,GLFYFDNSFRPVPLEQTYV<br>GITEK,FQIMNEIVYEK | TGNFQVTELGR,YAQDEHLITFFVPV<br>FEPLPPQYFIR,FPPFNPIQTQVFNT<br>VYNSDDNVFVGAPTGSQK,WLSCE<br>TQLPVVSR,YPPPTELLDLQPLPVSA<br>LR,AALETDENLLLCAPTGAGK,HLIL<br>PEK,LTADILTTCAADIQR,PLQDDE<br>GRCVIMCQGSK,NALLQLTDSQIAD<br>VAR,YHVLVNLGK,DILCGAADEVLA<br>VLK,NALLQLTDSQIADVARFCNRYR<br>NIELSYEVVVK |
| IPI00458439.1 | Q8K194-2 | Snrnp27  | Isoform 2 of U4/U6.U5 small nuclear ribonucleoprotein 27 kDa protein | LMGFASFDSTK,QITEEDLEGKTEEEIE<br>MMK                                                                                                                                                                                                                                                                                                                                                                                                                                                                                                                                                                                                                    |                                                                                                                                                                                                                                                                                         |
| IPI00461621.1 | Q6PE01   | Snrnp40  | U5 small nuclear ribonucleoprotein 40 kDa protein                    | LPGHAGSINEVAFHPDEPIILSASSDK,<br>HELLLGAAGAGPGAGPQQATPGALLQ<br>AGPPR,GHADSVTGLSLSSEGSYLLSN<br>AMDNTVR,AAVQTQNTYQVLAVTFN<br>DTSQIISGGIDNDIK,GHSGAVMELHY<br>NTDGSMLFSASTDK                                                                                                                                                                                                                                                                                                                                                                                                                                                                                |                                                                                                                                                                                                                                                                                         |
| IPI00625105.2 | Q62376   | Snrnp70  | Isoform 1 of U1 small nuclear ribonucleoprotein 70 kDa               | MWDPHNDPNAQGDFAK,GGGGSGQ<br>DNGLEGLGSDGR,DPIPYLPPLEK,GG<br>GGGGGGSGGGGGGDMAPSEAGD<br>GAPDDGPPGELGPEGPDGPEEK,GYA<br>FIEYEH                                                                                                                                                                                                                                                                                                                                                                                                                                                                                                                              | YDERPGPSPLPHR,GGADVNI,DM<br>YMEAGGDGYMAPENGYLMEAAP<br>E,VLVDVER,DPIPYLPPLEK                                                                                                                                                                                                             |
| IPI00122350.4 | Q62189   | Snrpa    | U1 small nuclear ribonucleoprotein A                                 | GQAFVIFK,DALQGFK                                                                                                                                                                                                                                                                                                                                                                                                                                                                                                                                                                                                                                       | GQAFVIFK,EVTSATNALR,ANHTI<br>YINNLNEK<br>AVQGGAAAPVVGAVQPVPGMPPM<br>PQAPR,EVTSATNALR                                                                                                                                                                                                    |
| IPI00170008.1 | P57784   | Snrpa1   | U2 small nuclear ribonucleoprotein A'                                | KLDGFPLLR,LTAEIEQAAQYTNVAVR,<br>SGPSDEGEEIEDDTVTNGS,GLLQSG<br>QIPGR,SLTYLSILR,LDGFPPLR,IPVIEN<br>LGATLDQFDAIDFSDNEIR,TFNPGAGL<br>PTDK,NAIANASTLAEVER,RSGPSDEG<br>EEEIEDDTVTNGS                                                                                                                                                                                                                                                                                                                                                                                                                                                                         | LTAELIEQAAQYTNVAVR,IGEGLD<br>QALPCLTELILTNNLSLVELGDLDP<br>LASLK,SLTYLSILR,IPVIENLGATL<br>DQFDAIDFSDNEIR<br>IGEGLDQALPCLTELILTNNLSLVELG<br>DLDPASLK,GLLQSQIPGR,KGGP<br>SAGDVEAIK                                                                                                         |

|               |        |        |                                                             |                                                                                                                        |                                                                                                              |
|---------------|--------|--------|-------------------------------------------------------------|------------------------------------------------------------------------------------------------------------------------|--------------------------------------------------------------------------------------------------------------|
| IPI00132576.1 | Q9CQI7 | Snrpb2 | U2 small nuclear ribonucleoprotein B''                      | TSDSIISK,GQAFVIFK,TMEQAAAAANK,<br>,DALQGFK,HDIAFVEFENDGQAGAAR,<br>ITPSHAMK,SLYALFSQFGHVVDIVALK                         | GQAFVIFK,SLYALFSQFGHVVDIV<br>ALK                                                                             |
| IPI00322749.3 | P62315 | Snrpd1 | Small nuclear ribonucleoprotein Sm D1                       | EPVQLETLSIR,NREPVQLETLSIR,GN<br>NIRYFILPDSLPLDTLLVDVEPK,YFILP<br>DSLPLDTLLVDVEPK,LSHETVTIELK,N<br>GTQVHGTITGVDVSMNTHLK | NREPVQLETLSIR,YFILPDSLPLD<br>TLLVDVEPK,LSHETVTIELK                                                           |
| IPI00119220.1 | P62317 | Snrpd2 | Small nuclear ribonucleoprotein Sm D2                       | MFLRGDSVIVLVRNPLIAGK,REEEEFN<br>TGPLSVLTQSVK,SEMTPEELQKREEE<br>EFNTGPLSVLTQSVK,EEEEFNTGPLS<br>VLTQSVK,NPLIAGK          | GDSVIVVLR,NNTQVLINCR                                                                                         |
| IPI00119224.1 | P62320 | Snrpd3 | Small nuclear ribonucleoprotein Sm D3                       | FLILPDMLK,VAQLEQVYIR                                                                                                   | VLHEAEGHIVTCETNTGEVYR,VA<br>QLEQVYIR<br>VLHEAEGHIVTCETNTGEVYR,FLIL<br>PDMLK,VAQLEQVYIR                       |
| IPI00133955.1 | P62305 | Snrpe  | Small nuclear ribonucleoprotein E                           |                                                                                                                        | IQVWLYEQVNMNR,VMVQPINLIFR,<br>GDNITLLQSVSN<br>VMVQPINLIFR,IEGCIIGFDEYMNLV<br>LDDAEEIHSK                      |
| IPI00128699.3 | P63163 | Snrpn  | Small nuclear ribonucleoprotein-<br>associated protein N    | VLGLVLLR,VLGLVLLRGENLVSMTVE<br>GPPPK,HMNLILCDCDEFR,IFIGTFK,M<br>LQHIDYR                                                | VLGLVLLR,RVLGLVLLR,IFIGTFK                                                                                   |
| IPI00317298.2 | Q9CSN1 | Snw1   | SNW domain-containing protein 1                             | EGPVQFEEDPFGLDK,DISEVIALGVPN<br>PR,LLEDFGDGGAFPEIHVAQYPLDMG<br>R,EVMNADDPDLQRPDEEAIKEITEK,S<br>LQTSLVSSR,RPSDSSRPK     |                                                                                                              |
| IPI00468902.2 | Q3V2H3 | Snx12  | sorting nexin 12 isoform 2                                  | PQDLTDAYGPPSNFLEIDIFNPQTVGV<br>GR,GDEGIFEEFIEER,LNSKPQDLTD<br>AYGPPSNFLEIDIFNPQTVGVGR                                  |                                                                                                              |
| IPI00128062.1 | Q91WE1 | Snx15  | Sorting nexin-15                                            | EESTGPSPTHTGELAAIEVESK,RLEEF<br>PAFPR                                                                                  |                                                                                                              |
| IPI00130589.8 | P08228 | Sod1   | Superoxide dismutase [Cu-Zn]                                | HVGDLGNVTAGK,DGVANVSIEDR,HG<br>GPADEER,VISLSGEHSIIGR,TMVVHE<br>K,GDGPVQGTIHFEQK,KHGGPADEER                             | HVGDLGNVTAGK,DGVANVSIED<br>R,VISLSGEHSIIGR,LACGVIGIAQ,<br>GDGPVQGTIHFEQK<br>VISLSGEHSIIGR,GDGPVQGTIHFE<br>QK |
| IPI00109109.1 | P09671 | Sod2   | Superoxide dismutase [Mn],<br>mitochondrial                 |                                                                                                                        | GELLEAIK,GDVTTQVALQPALK,A<br>IWNVINWENVTER<br>GDVTTQVALQPALK,NVRPDYLK,H<br>HAAYVNNLNATEEK                    |
| IPI00828218.2 |        | Son    | 269 kDa protein                                             | AGVPLPPNLKPAPPPTIEEK,SEGQLN<br>GETNPPIEGNQAGDTAASAR                                                                    | DAEHNTVCATTVGPVGEASEEKILP<br>ISETK,ATAATVVVLQAMGLVPK,ILDS<br>FTAAPVPMSTAALK,HPVSALMEIC<br>NK                 |
| IPI00468140.2 | Q62417 | Sorbs1 | Isoform 1 of Sorbin and SH3 domain-<br>containing protein 1 | PSSAYPSTTIVNPTIVLLQHNR,QGIFPI<br>TYVDVLK,SVLEGGDIPLQGLSGLK,LA<br>PVQVLEYGEIAIAK,TPVDYIDL PYSSSP<br>SR,HFIPADYLESTEEFIR |                                                                                                              |
| IPI00830717.1 | Q60I23 | Sox2   | sex-determining region Y-box 2                              | LHMAQHYQSGPVPGTAINGTLPLSHM,<br>SEASSPVPVVTSSSHSR,SEASSPVPV<br>VTSSSHSRAPCQAGDLR                                        |                                                                                                              |
| IPI00126343.1 | P07214 | Sparc  | SPARC                                                       | LEAGDHPVELLAR,QDINK                                                                                                    |                                                                                                              |



|               |        |        |                                                                       |                                                                                      |
|---------------|--------|--------|-----------------------------------------------------------------------|--------------------------------------------------------------------------------------|
| IPI00169793.1 | Q8K1N4 | Spats2 | Isoform 1 of Spermatogenesis-associated serine-rich protein 2         | TGSVLENGVSDFEPK,AEAMEILLSR,E<br>LEDPEFAAAETLDR,TTPGAQVSNLGM<br>ENVPLSSTNK,MSEEQLVELR |
| IPI00750617.2 | Q3UA16 | Spc25  | Isoform 1 of Kinetochore protein Spc25                                | LKEEER,LQFIFTSIDPK                                                                   |
| IPI00331223.3 | Q62407 | Speg   | Isoform 1 of Striated muscle-specific serine/threonine-protein kinase | TGTLEFMAPEMVK,PSLAPLFTR,KP<br>TVCESETR,QDGGHLHLHIAR,DLGP<br>LTCSAR                   |
| IPI00378158.1 | Q62504 | Spen   | Isoform 1 of Msx2-interacting protein                                 | EPAETPR,IIEHFK,PAPQTLTGLVSA<br>LTGLVNVSLVPVNLK,LHPYTVPR                              |

|               |        |       |                                          |                                                                                                                                                                                                                                                                                                                                                                                                                                                                                                                                                                                                                                                                                                                                                                                                                                                                                                                                                                                                                                                                                                                                                                                                                                                                                                                                                                                                                                                        |
|---------------|--------|-------|------------------------------------------|--------------------------------------------------------------------------------------------------------------------------------------------------------------------------------------------------------------------------------------------------------------------------------------------------------------------------------------------------------------------------------------------------------------------------------------------------------------------------------------------------------------------------------------------------------------------------------------------------------------------------------------------------------------------------------------------------------------------------------------------------------------------------------------------------------------------------------------------------------------------------------------------------------------------------------------------------------------------------------------------------------------------------------------------------------------------------------------------------------------------------------------------------------------------------------------------------------------------------------------------------------------------------------------------------------------------------------------------------------------------------------------------------------------------------------------------------------|
| IPI00753815.3 | P16546 | Spna2 | Isoform 1 of Spectrin alpha chain, brain | <p>ALINADELANDVAGAEALLDR,HQAFE<br/>AELHANADR,EAIVTSEELGQDLEHVE<br/>VLQK,YTEHSTVGLAQWQDQLDQLGM<br/>R,NQALNTDNYGHDLASVQALQR,ELV<br/>LALYDYQEK,IAALQAFADQLIAVDHYA<br/>K,AGTFQAFEQFGQQLLAHGHIASPEI<br/>K</p> <p>MQHNLEQQIQAR,IDGITIQAR,LF<br/>GAAEVQR,VNEVSQFAAK,KFEF<br/>QTDLAAHEER,LIQNNHYAMEDV<br/>ATR,TATDEAYKDPSNLQGK,ADV<br/>VESWIGEK,LAALADQWQFLVQK,<br/>GLVSSDELAK,KLDPAQSASR,KH<br/>QLLEADISAHEDR,DLTNVQNLQK<br/>,EAIVTSEELGQDLEHVEVLQK,LI<br/>QEQHPPEEELIK,ELVLALYDYQEK,<br/>NVEDIELWLYEVEGHLASDDYQK,<br/>IAALQAFADQLIAVDHYAK,DVED<br/>EETWIR,VLETAEDIQER,EAALTN<br/>EEVGADLEQVEVLQK,LLVSSSEDY<br/>GR,ENLLEEQGSIALR,KVEDLFLT<br/>FAK,DVDEIEAWISEK,SLQQLAEE<br/>R,TALLELWELR,AQLADSFHLQQ<br/>FFR,LLEATELK,LSDDNTIGQEEIQ<br/>QR,LMVHTVATFNSIK,LQQSHPL<br/>SASQIQVK,SADESGQALLAASHY<br/>ASDEVK,DVTGAEALLER,KHEAF<br/>ETDFTVHK,NTTGVTEEALK,MTL<br/>VASEDYGDTLAAIQGLLK,ELPTA<br/>FDYVEFTR,DLASVQALLR,ALINA<br/>DELANDVAGAEALLDR,LDETGNL<br/>MISEGHFASETIR,GNAMVEEGHF<br/>AAEDVK,DLTGVQNLRLQASDE<br/>SYKDPTNIQSK,DLSSVQTLTK,A<br/>LSSEGKPYVTK,ITALDEFATK,LG<br/>DSHDLQR,LQVASEDNYKDPTNL<br/>QGK,REELITNWEQIR,DVDETIG<br/>WIK,LAQFVEHWK,SQLLGSAHEV<br/>QR,SSLSSAQADFNQLAELDR</p> <p>EAALTNEEVGADLEQVEVLQK,LSE<br/>LNQK,MQHNLEQQIQARNTTGVTEE<br/>ALKEFSMMFK,SADESGQALLAASH<br/>YASDEVK,DLIGVQNLK,ELPTAFD<br/>YVEFTR,ENLLEEQGSIALR,ALINAD<br/>ELANDVAGAEALLDR,SQLLGSAHE<br/>VQR,HQALQAEIAGHEPR,LIQSHPE<br/>SAEDLK,IAALQAFADQLIAVDHYAK,<br/>DLSSVQTLTK</p> |
|---------------|--------|-------|------------------------------------------|--------------------------------------------------------------------------------------------------------------------------------------------------------------------------------------------------------------------------------------------------------------------------------------------------------------------------------------------------------------------------------------------------------------------------------------------------------------------------------------------------------------------------------------------------------------------------------------------------------------------------------------------------------------------------------------------------------------------------------------------------------------------------------------------------------------------------------------------------------------------------------------------------------------------------------------------------------------------------------------------------------------------------------------------------------------------------------------------------------------------------------------------------------------------------------------------------------------------------------------------------------------------------------------------------------------------------------------------------------------------------------------------------------------------------------------------------------|

|               |        |         |                                                          |                                                                                                                                       |                                                                                                                                                                                                                                                                                                                                                                                                                                                                                |                                                                              |
|---------------|--------|---------|----------------------------------------------------------|---------------------------------------------------------------------------------------------------------------------------------------|--------------------------------------------------------------------------------------------------------------------------------------------------------------------------------------------------------------------------------------------------------------------------------------------------------------------------------------------------------------------------------------------------------------------------------------------------------------------------------|------------------------------------------------------------------------------|
| IPI00319830.7 | Q62261 | Spnb2   | Isoform 1 of Spectrin beta chain, brain 1                | LSDGNEYLFQAK, QNLLSQSHAYQQFLR, TLETPAAQMEGFLNR                                                                                        | INAVVETGR, GNLEVLFTIQSK, LE DLEVIQHR, AQTLPTS VVTITSESS PGK, DALLSALS IQNYHLECNETK, ITDLYTDLR, HALVEADIAQAER, F QIQDISVETEDNK, LLEVELSGER, A LVADSHPESE, LVSQDNFGFDL PAVEAATK, DLVAIEAK, IHCLENV DK, KHEAIETDIAAYEER, LTTLELL EVR, VQAVVAVAR, VLDNAIETEK, I VSSNDVGHDEYSTQSLVK, VLLLS QDYGK, DLTSVNILLK, EAICEVAL DYK, LWEYLLELLR, LVSDGNINSD R, LEEASLLHQFQADADDIDAWM LDILK, FQIQDISVETEDNKEK, DVE DEILWVGER, VAVVNQIAR, TQILA ASYELHK, DGLNEAWADLLELIDT R, EIEELQSQAQALSQEGK | INAVVETGR, VQAVVAVAR, AQTLPT SVVTITSESSPGK, WVNSHLAR, EM AELTR, KQQMLENQMEVR |
| IPI00111254.8 | Q8R0G7 | Spns1   | Protein spinster homolog 1                               |                                                                                                                                       | STAEAFQIVLSHLLGDAGSPYLIGLI SDR, YLMCGGIAFWSLVTLGSSFIPR                                                                                                                                                                                                                                                                                                                                                                                                                         |                                                                              |
| IPI00129164.1 | Q91XH5 | Spr     | sepiapterin reductase                                    |                                                                                                                                       | TVVNISSLCALQPYK, LLLINNAATLG DVSK                                                                                                                                                                                                                                                                                                                                                                                                                                              |                                                                              |
| IPI00470991.3 | Q68FG3 | Spty2d1 | Protein SPT2 homolog                                     |                                                                                                                                       | GVQSAAVQAFLR, QAALSSPK, KLAS NSHLSGR, MDFREILLIASK                                                                                                                                                                                                                                                                                                                                                                                                                             |                                                                              |
| IPI00133374.5 | Q64337 | Sqstm1  | Isoform 1 of Sequestosome-1                              |                                                                                                                                       | EHRPPCAQEAPR, VAVLFPTLRPGG FQAHYR                                                                                                                                                                                                                                                                                                                                                                                                                                              |                                                                              |
| IPI00886004.1 |        | Srcap   | PREDICTED: similar to Snf2-related CBP activator protein |                                                                                                                                       | GNWGPHLIIVPTSVMLNWEMELK, SEGSMVMVAIQDDLDLADSGPSGLE LTPPVVSLTPK, EGFWSLK, IFQLSEA HGALAPVYGTVEVLDLDFCTLPQPVASPIGPR                                                                                                                                                                                                                                                                                                                                                              |                                                                              |
| IPI00136912.1 | Q64674 | Srm     | Spermidine synthase                                      |                                                                                                                                       | EPVQQLTQAQVEQMQLK, YQDIL VFR, KVLIIIGGGDGGVLR, NPSTNFR, VLIIGGGDGGVLR                                                                                                                                                                                                                                                                                                                                                                                                          | EPVQQLTQAQVEQMQLK, ETCSLW PGQALSLQVEQLLHHR, NPSTNFR                          |
| IPI00222977.1 | Q8BMA6 | Srp68   | Signal recognition particle 68 kDa protein               | DLPDVQELITQVR, LASAFTEEQAVLYN QR, IFLLGLADNEAAIVQAESEETK, YLL LVLMDAER                                                                | FHLLSR, DLPDVQELITQVR, YANEV SSHGGASK                                                                                                                                                                                                                                                                                                                                                                                                                                          |                                                                              |
| IPI00316133.7 |        | Srp72   | signal recognition particle 72                           | AIELLQEFSDQHPENAAEIK, GTQGATA GASSELDASK, DIHTLAQLISAYSLVDP EK, LKPTDVALLAVIANNIITINK, VDVEA LENSFGATYIR, TEEALQLYNQIIK, EAV SDLEQLWK | AIELLQEFSDQHPENAAEIK, LKPT DVALLAVIANNIITINK                                                                                                                                                                                                                                                                                                                                                                                                                                   |                                                                              |
| IPI00387234.2 | O70551 | Srpk1   | Serine/threonine-protein kinase SRPK1                    | FSAGNFLINPLEPK, LEESNSIGQDQTL TER, QDITQLEESIR, SAEHYTETALDEIR                                                                        | FSAGNFLINPLEPK, HFTEDIQTR                                                                                                                                                                                                                                                                                                                                                                                                                                                      |                                                                              |

|               |          |       |                                                              |                                                                                                                                                                                                                                                                                                                                                                              |                                                                                                                                                                                                  |                                        |
|---------------|----------|-------|--------------------------------------------------------------|------------------------------------------------------------------------------------------------------------------------------------------------------------------------------------------------------------------------------------------------------------------------------------------------------------------------------------------------------------------------------|--------------------------------------------------------------------------------------------------------------------------------------------------------------------------------------------------|----------------------------------------|
| IPI00119695.1 | Q9DBG7   | Srpr  | Signal recognition particle receptor subunit alpha           | LITVNTPDLVLFVGEALVGNEAVD<br>QLVK,NQGFDDVVLVDTAGR                                                                                                                                                                                                                                                                                                                             |                                                                                                                                                                                                  |                                        |
| IPI00111271.1 | P47758   | Srprb | Signal recognition particle receptor subunit beta            | AVVFVVDSAAFQR,DVAEFLYQVL<br>IDSMALK                                                                                                                                                                                                                                                                                                                                          |                                                                                                                                                                                                  |                                        |
| IPI00605037.1 | Q52K18   | Srrm1 | Isoform 1 of Serine/arginine repetitive matrix protein 1     | APKPEPVPEPK,KVELSESEEDK<br>GSK                                                                                                                                                                                                                                                                                                                                               | VNLEVIKPWITK,KVDMASKVNLEVIK                                                                                                                                                                      |                                        |
| IPI00785240.1 | Q8BT18   | Srrm2 | Isoform 1 of Serine/arginine repetitive matrix protein 2     |                                                                                                                                                                                                                                                                                                                                                                              | TPAASAVNLAGAR,TAVAPSAVNLA<br>DPR,PAVLSALDQSQSQPSK,LGLIQ<br>EDVASSCIPR                                                                                                                            |                                        |
| IPI00134300.1 | P32067   | Ssb   | Lupus La protein homolog                                     | DTNLLILFK,KITDDQQESLNK,MTALEA<br>K,GSHVFTAAR,GFPTDATTDDIK,NAN<br>NGNLLLR,SPSRPLPEVTDEYK,GQILNI<br>QMR,PLPEVTDEYK,LMEVSADK,GFPT<br>DATLDDIKEWLDDK,PLPEVTDEYKND<br>VK,EDLHFLFSNHGEIK,EGIILFK,YKDT<br>NLLILFKEDYFAK,LDEGWVPLETMIK,<br>GSIFAVFDSIQSAK,YKDTNLLILFK,KFV<br>EIPGQK,RSPSRPLPEVTDEYK,GKGN<br>RPGYAGAPK,SPSRPLPEVTDEYKND<br>VK,VLEGHAEK,ITDDQQESLNK,LTTDF<br>NVIVQALSK | DTNLLILFK,NANNGNLLLR,GKGN<br>RPGYAGAPK,GFPTDATTDDIKE<br>WLDDKQILNIQMR,GNRPGYAG<br>APK,LDEGWVPLETMIK,ICHQIEY<br>YFGDFNLPR,YKDTNLLILFK,GSIF<br>AVFDSIQSAK,GSHVFTAAR,ITDD<br>QQESLNK,LTTDFNVIVQALSK | GQILNIQMR,GSHVFTAAR,LTTDFN<br>VIVQALSK |
| IPI00110852.4 | Q52PE3   | Ssr1  | Translocon-associated protein alpha, muscle specific isoform | PFGLVINLNYK,FLVGFTNK                                                                                                                                                                                                                                                                                                                                                         |                                                                                                                                                                                                  |                                        |
| IPI00407571.2 | Q08943-2 | Ssrp1 | Isoform 2 of FACT complex subunit SSRP1                      | SFDFEIETK,FYVPPTQEDGVDPV<br>EAFQNVLSK,ADVQATGDAICIF<br>R,FDEISFVNFR                                                                                                                                                                                                                                                                                                          | LFLPHK,VALGHGLK,FGGQLLSFDI<br>GDQPVFEIPLSNVSQCTTGK,VDNI<br>QAGELTEGIWR,FYVPPTQEDGVDP<br>VEAFQNVLSK                                                                                               |                                        |
| IPI00116308.1 | Q99L47   | St13  | Hsc70-interacting protein                                    | LDYDEDASAMLR,GAAIEALNDGELQK<br>,AIEINPDSAQPYK,AIDLFTDAIK                                                                                                                                                                                                                                                                                                                     | LLGHWEEAAHDLALACK,LAILYA<br>K,KGAAIEALNDGELQK,AIEINPD<br>SAQPYK,AIDLFTDAIK                                                                                                                       | AIEINPDSAQPYK,AIDLFTDAIK               |
| IPI00468418.2 | O88811   | Stam2 | Isoform 1 of Signal transducing adapter molecule 2           | HGELITVLDDSDANWWQGENHR,LNVI<br>DDDVEEIKKSEPEPVYIDEKG                                                                                                                                                                                                                                                                                                                         |                                                                                                                                                                                                  |                                        |
| IPI00749596.1 | A2A5S3   | Stau1 | stau1 (RNA binding protein) homolog 1 isoform 1              | NAAENMLEILGFK,SEISQVFEIALK,NL<br>PVNFESLLTQVAR                                                                                                                                                                                                                                                                                                                               |                                                                                                                                                                                                  |                                        |

|               |        |        |                                                                 |                                                                                                                                                                                                                                                                                                                                                                                                                                                                                        |                                                                                                                                              |                                                                                                                                                                      |
|---------------|--------|--------|-----------------------------------------------------------------|----------------------------------------------------------------------------------------------------------------------------------------------------------------------------------------------------------------------------------------------------------------------------------------------------------------------------------------------------------------------------------------------------------------------------------------------------------------------------------------|----------------------------------------------------------------------------------------------------------------------------------------------|----------------------------------------------------------------------------------------------------------------------------------------------------------------------|
| IPI00121514.3 | Q60864 | Stip1  | Stress-induced-phosphoprotein 1                                 | FMNPFNLPNLYQK,LMDVGLIAIR,EPK<br>PEPMEEDLPENK,LILEQMOKDPQALS<br>EHLK,AMADPEVQQIMSDPAMR,DAIH<br>FYNK,LILEQMOK,LAYINPDLALEEK,EL<br>DPTNMTYITNQA AVHFEK,KFMNPFNL<br>PNLYQK,SLLSDPTYR,AAALEFLNR,R<br>AMADPEVQQIMSDPAMR,EGLQNMEA<br>R,LDPQNHVLYSNR,LLEFQLALK,KEP<br>KPEPMEEDLPENK,LILEQMOKDPQAL<br>SEHLKNPVIAQK,DPQALSEHLK,VMTT<br>LSVLLGVDLGSMDDEEEEAATPPPPPP<br>PK,SLLSDPTYRELIEQLQNKPSDLGTK<br>,TYEEGLKHEANLQLK,KAAALEFLNR<br>FEEAK,AKELDPTNMTYITNQA AVHFE<br>K,HEANLQLK,ELIEQLQNKPSDLGTK | HYTEAIK,DPQALSEHLK,AAALEF<br>LNR,ALSAGNIDDALQC YSEAIK,L<br>AYINPDLALEEK,LDPQNHVLYSN<br>R,LLEFQLALK,LMDVGLIAIR,ALD<br>LDSSCK,ELIEQLQNKPSDLGTK | HYTEAIK,DPQALSEHLK,AAALEFLN<br>R,DCEECIQLEPTFIK,NPVIAQK,FM<br>NPFNLPNLYQK,ALSAGNIDDALQC<br>YSEAIK,LAYINPDLALEEK,LLEFQLA<br>LK,HEANLQLK,ELIEQLQNKPSDL<br>GTK,AAALEAMK |
| IPI00551236.3 | P54227 | Stmn1  | Stathmin                                                        | RASGQAFELILSPR,DLSLEEIQK,DLSL<br>EEIQKLEAAEER,SKESVPDFPLSPPK<br>,ASGQAFELILSPR,ELEKRASGQAFELI<br>LSPR,ESVPDFPLSPPK                                                                                                                                                                                                                                                                                                                                                                     | KDLSLEEIQK,DLSLEEIQK,ASGQ<br>AFELILSPR                                                                                                       | AIEENNNFSK,ASGQAFELILSPR,SH<br>EAEVLK,ESVPDFPLSPPK                                                                                                                   |
| IPI00115117.1 | Q99JB2 | Stom12 | Stomatin-like protein 2                                         |                                                                                                                                                                                                                                                                                                                                                                                                                                                                                        | NTVILFVPQQEAWVVER,ILEPGL<br>NVLIPVLDLDR,AEQINQAAGEASAV<br>LAK,APVPGAQNSSQSR                                                                  | ILEPGLNVLIPVLDLDR,AEQINQAAGEA<br>SAVLAK,DSNTVLLPSNP SDVTSMV<br>AQAMGVYGALTK,ATVLESEGTR                                                                               |
| IPI00130670.1 | Q9Z1Z2 | Strap  | 39 kDa protein                                                  | TVDFQTQDSNYLLTGGQDK,FSPDGELY<br>ASGSEDGTLR,VWDAVSGDELMTLAH<br>K,SIAFHSAVSLLEPIK,YDYNSGEELESY<br>K,SFEAPATINSASLHPEK,QGDTGDWI<br>GTFLGHK                                                                                                                                                                                                                                                                                                                                                |                                                                                                                                              |                                                                                                                                                                      |
| IPI00554884.1 | Q5BKR9 | Strn   | Striatin, calmodulin binding protein                            | ETAMIGKSEL TDSASVLDNFK,SELTDS<br>ASVLDNFK,STSLDVEPIYTFR                                                                                                                                                                                                                                                                                                                                                                                                                                |                                                                                                                                              |                                                                                                                                                                      |
| IPI00471361.3 | Q9WUD1 | Stub1  | STIP1 homology and U box-containing protein 1                   | LNFQDDIPSALR,SPLTQEQLIPNLAMK<br>,YMADMDELFSQVDEK                                                                                                                                                                                                                                                                                                                                                                                                                                       |                                                                                                                                              |                                                                                                                                                                      |
| IPI00406442.2 | Q9WUM5 | Suclg1 | succinate-CoA ligase, GDP-forming, alpha subunit, isoform CRA_a |                                                                                                                                                                                                                                                                                                                                                                                                                                                                                        |                                                                                                                                              | ISALQSAGVVVSMSPAQLGTTIYK,A<br>KPVVSFIAGITAPPGR,HIYIDK,HLGL<br>PVFNTVK                                                                                                |
| IPI00408957.3 | Q9CX34 | Sugt1  | Suppressor of G2 allele of SKP1 homolog                         | LLHPIIPEQSTFK,LDSTDTNFDTWIK,S<br>FMESGGTVLSTNWSVDVGKR,LFQQIY<br>SDGSDEVKR,LFQSFSDALIDGDPQAA<br>LEELTK,LFQQIYSDGSDEVK,IKYDWY<br>QTESHVIITLMIK,DYASALETFAEGQK,<br>SFMESGGTVLSTNWSVDVGK,YDWYQ<br>TESHVIITLMIK                                                                                                                                                                                                                                                                             | LEGQGDEPTPK,LFQSFSDALIDG<br>DPQAALEELTK                                                                                                      | LLHPIIPEQSTFK,LDSTDTNFDTWIK<br>,AYCHILLGK,LFQSFSDALIDGDPQA<br>ALEELTK,SFMESGGTVLSTNWSVDV<br>GK                                                                       |

|               |        |         |                                                                 |                                                                                                                                                                                                                                                                                                                                 |                                                                                                                                                                                                                           |                                                                                                                                               |
|---------------|--------|---------|-----------------------------------------------------------------|---------------------------------------------------------------------------------------------------------------------------------------------------------------------------------------------------------------------------------------------------------------------------------------------------------------------------------|---------------------------------------------------------------------------------------------------------------------------------------------------------------------------------------------------------------------------|-----------------------------------------------------------------------------------------------------------------------------------------------|
| IPI00120344.2 | Q920B9 | Supt16h | FACT complex subunit SPT16                                      |                                                                                                                                                                                                                                                                                                                                 | VEALTKEELEFEVPFR,TYALFIGD<br>TVLVEDEGPATILTSVK,TLMVDP<br>TQEVQENYNFLLQLQEELLK,HTD<br>VQFYTEVGEITDGLK,AASITSEV<br>FNK,GDKVDILYNNIK,NFDMVIVY<br>K,NEGNIFPNPEATFVK,NVGIFLK,<br>KAASITSEVFNK,ELAAQLNEEAK,<br>APGEQTPALNLQNAFR | INFYCPGSALGR,TLMVDPTQEVQE<br>NYNFFLLQLQEELLK,IIFMASKK,ICDV<br>YNSVMDVVK,NEGNIFPNPEATFVK,<br>NVGIFLK,APGEQTPALNLQNAFR                          |
| IPI00656221.1 | O55201 | Supt5h  | Isoform 1 of Transcription elongation factor SPT5               |                                                                                                                                                                                                                                                                                                                                 |                                                                                                                                                                                                                           | HLVLAGGSKPR,HLVLAGGSK                                                                                                                         |
| IPI00454050.1 | Q62383 | Supt6h  | Transcription elongation factor SPT6                            |                                                                                                                                                                                                                                                                                                                                 | LIICNVTGIAHR,VLGIAFSSAR,LK<br>DLDLDAFAEELER,IKEDGDEEGE<br>GEEAEDEEQRGPELK,RPQGESY<br>DQAIR,KLEELLIK,VNEVGVDVNR,<br>KPHVVTIAGENR                                                                                           | KFLVNK,DHPVFCALVNGEGEVTDF<br>LR,KPHVVTIAGENR                                                                                                  |
| IPI00406117.1 | Q7TMK9 | Syncrip | Isoform 1 of Heterogeneous nuclear ribonucleoprotein Q          | VAEKLDEIYVAGLVAHSDLDER,SENQ<br>EFYQDTFGQQWK,KYGGPPPSVYS<br>GQQPSVGTEIFVGK,TGYTLDVTTGQR<br>,NLANTVTEEILEK,YGGPPPSVYSGQ<br>QPSVGTEIFVGK,EFNEDGALAVLQQF<br>K,VWGNVGTVEWADPIEDPDPEVMAK<br>,LDEIYVAGLVAHSDLDER,AGPIWDLR,<br>LMMDPLTGLNR,VTEGLTDVILYHQPD<br>DK,DLFEDELVPLFEK,QTNNQNWGSQ<br>PIAQQPLQGGDHSGNYGYK,DLEGENI<br>EIVFAKPPDQK | TGYTLDVTTGQR,NLANTVTEEIL<br>EK,EFNEDGALAVLQQFK,LDEIYV<br>AGLVAHSDLDER,AGPIWDLR,DS<br>DLSHVQNK,VTEGLTDVILYHQPD<br>DK,GYAFVTCTK,LFVGSIPK,DLF<br>EDELVPLFEK,TKEQILEEFSK,LY<br>NNHEIR,DLEGENIEIVFAKPPDQK<br>,HIGVCISVANNR     | TGYTLDVTTGQR,NLANTVTEEILEK<br>,LFVGSIPK,DLFEDELVPLFEK,EFN<br>EDGALAVLQQFK,EEAQEAVK,AGPI<br>WDLR,HIGVCISVANNR,DSDLSHVQ<br>NK                   |
| IPI00403993.5 |        | Syne1   | synaptic nuclear envelope 1 isoform 3                           | DLKAFESWLEQEQEKDR,EQVTTLED<br>TLEEDIK,MLFDEVQFK,QSPPPGMAQ<br>HLLMDHLAICSELEAK,PDVLSQELGIA<br>EDQMR,LPVQDPVRDTCGACHTALK,<br>RQIHENQGGCCGLIDLVR                                                                                                                                                                                   |                                                                                                                                                                                                                           | ECHPPVAETLSSTLQEVNMR,RDLQ<br>EQMEQAQQGGQAGPGQEELR,DIT<br>AWLINVEESLTR,KNEIVPIDSTLDPE<br>TLQDHHK,QDILLMK,QLMQIK,QEG<br>GLQK,RQIHENQGGCCGLIDLVR |
| IPI00845851.1 |        | Syne2   | synaptic nuclear envelope 2                                     |                                                                                                                                                                                                                                                                                                                                 |                                                                                                                                                                                                                           | MESLEMALQIVLPLEK,HSMTVLEN<br>QIGCLTPELSELKR,ESFIDVLSLK,E<br>LEVSILR                                                                           |
| IPI00465585.1 |        | Tacc2   | transforming, acidic coiled-coil containing protein 2 isoform c | IGSTEVEKPPGLLFQQPDLSALQVAR<br>,SPASFEIPASTTEADGDGLNKPAK                                                                                                                                                                                                                                                                         |                                                                                                                                                                                                                           |                                                                                                                                               |
| IPI00757998.1 | Q99LH8 | Tacc3   | Tacc3 protein                                                   | ENQRPLAPVDDAPVVQMAAEILR,GLL<br>PAEPIVDVLK                                                                                                                                                                                                                                                                                       |                                                                                                                                                                                                                           |                                                                                                                                               |
| IPI00876056.1 |        | Taf15   | 62 kDa protein                                                  | AAIDWFDGK,NGDWVCPNPSCGNMN<br>FAR                                                                                                                                                                                                                                                                                                |                                                                                                                                                                                                                           |                                                                                                                                               |
| IPI00226515.5 | P37804 | Tagln   | Transgelin                                                      | TDMFQTVDLYEKG,AAEDYGVIK                                                                                                                                                                                                                                                                                                         |                                                                                                                                                                                                                           | VPENPPSMVFK,TLMALGSLAVTK,L<br>GFQVWLK                                                                                                         |

|               |        |        |                                                          |                                                                                                                  |                                                                                                                                 |                                                                                                                                                                                                                                                |
|---------------|--------|--------|----------------------------------------------------------|------------------------------------------------------------------------------------------------------------------|---------------------------------------------------------------------------------------------------------------------------------|------------------------------------------------------------------------------------------------------------------------------------------------------------------------------------------------------------------------------------------------|
| IPI00125778.3 | Q9WVA4 | Tagln2 | transgelin                                               | EDVGQPQPGR,GASQAGMTGMGCHG<br>DPLIILSLLPLPSMNG,LINSLYPEGQAP<br>VK,LINSLYPEGQAPVKK,QMEQISQFL<br>QAAER,TLMNLGGLAVAR | NMACVQRTLMLNLGGLAVAR,YGI<br>NTTDIFQTVDLWEGK,LINSLYPE<br>GQAPVK                                                                  | EDVGQPQPGR,YGINTTDIFQTVDL<br>WEGK,DDGLFSGDPNWFPPK,LINSL<br>YPEGQAPVK,TLMNLGGLAVAR                                                                                                                                                              |
| IPI00124692.1 | Q93092 | Taldo1 | Transaldolase                                            |                                                                                                                  | TIVMGASFR,LFVLFGAELK,SYEP<br>QEDPGVK,ALAGCDFLTISP,K,LIE<br>LYK,VSTEVDAR,LGGPQEEQIK,L<br>LGELLK,IHLDEK,KLGGPQEEQIK,<br>MESALDQLK | ILDWHVANTDK,ALAGCDFLTISP,K,L<br>GGPQEEQIK,VSTEVDAR,LLGELLK,<br>IHLDEK,LSSTWEGIQAGK                                                                                                                                                             |
| IPI00121758.1 | Q921F2 | Tardbp | TAR DNA-binding protein 43                               | DYFSTFGEVLMVQVK,FGGNPGGFGN<br>QGGFGNSR,AFAFVTFADDK,TSDLIVL<br>GLPWK,LVEGILHAPDAGWGNLVYVV<br>NYPK                 | GISVHISNAEPK,FGGNPGGFGN<br>QGGFGNSR,DYFSTFGEVLMVQV<br>K,VAQSLCGEDLIK,AFAFVTFAD<br>DK,LVEGILHAPDAGWGNLVYVV<br>NYPK,TSDLIVLGLPWK  | VAQSLCGEDLIK,VTEDENDEPIEIP<br>SEDDGTVLLSTVTAQFPGACGLR                                                                                                                                                                                          |
| IPI00468688.4 | Q9D0R2 | Tars   | Threonyl-tRNA synthetase, cytoplasmic                    | NELSGALTGLTR,IYGISFPDPK                                                                                          | NELSGALTGLTR,NAQLAQYNFIL<br>VVGK,LKAEHDSILAEK,ASGTVN<br>IR,FLGDIEIWNQAEK,MIILTENY<br>GGK,GAYIYNTLMEFIR                          | NELSGALTGLTR,QQFHDAK,QVMV<br>VPVGPTCDEYAQK,ASGTVNIR,IYGI<br>SFPDPK,TPYQIACGISQGLADNTV<br>VAK,LADFGVLHR                                                                                                                                         |
| IPI00222972.5 | P48428 | Tbca   | Tubulin-specific chaperone A                             | LEAAYTDLQQILESEKDLLEEAEYK,RL<br>EAAYTDLQQILESEK,LEAAYTDLQQIL<br>ESEK                                             |                                                                                                                                 |                                                                                                                                                                                                                                                |
| IPI00315948.3 | Q9D1E6 | Tbcb   | Tubulin-folding cofactor B                               |                                                                                                                  |                                                                                                                                 | IHVIDHSGVR,AQASAI SVGSR                                                                                                                                                                                                                        |
| IPI00124057.1 | Q8VE90 | Tbl3   | Transducin (beta)-like 3                                 |                                                                                                                  |                                                                                                                                 | VNILDVASGALLR,LWPLPEALLANK<br>,LWALPQCQLLVGFTGHR                                                                                                                                                                                               |
| IPI00121887.5 | P10711 | Tcea1  | Isoform 2 of Transcription elongation factor A protein 1 | NAAGALDLLKELKNIPMTLELLQSTR,N<br>IPMTLELLQSTR,TGDDYVAIGADEEEL<br>GSQIEEAIYQEIR                                    |                                                                                                                                 |                                                                                                                                                                                                                                                |
| IPI00471277.1 | Q8CGF7 | Tcerg1 | Isoform 1 of Transcription elongation regulator 1        | RGPPPPPR,EALFNEFVAAAR,EEAIQN<br>FKALLSDMVR                                                                       |                                                                                                                                 |                                                                                                                                                                                                                                                |
| IPI00830311.1 |        | Tcf3   | transcription factor E2a isoform 1                       | TSPDEDEDLLPPEQKAEREK,VSGVV<br>GDPQLALSAAHPGLGEAHNPAGHL,K<br>VPPGLPSSVYPPSSGDSYSR                                 |                                                                                                                                 |                                                                                                                                                                                                                                                |
| IPI00817019.1 | A1A549 | Tcf711 | transcription factor 3 isoform 1                         | WPLLDVPSSATVK,QLSQTQSQQIQ<br>EAEGALASK,SSLVNESENQSSSSDSE<br>AERR                                                 |                                                                                                                                 |                                                                                                                                                                                                                                                |
| IPI00408190.1 | Q7TPZ2 | Tcof1  | Tcof1 protein (Fragment)                                 |                                                                                                                  |                                                                                                                                 | AGAVTSSASLSSPALAK,SFLTQPVT<br>LLDIYTHWQQTSELGQK,PTPVNSA<br>TAALPSK,EASSGSTPQKPK,LLEQA<br>WPLSEAQVQASVVK                                                                                                                                        |
| IPI00118678.1 | P11984 | Tcp1   | T-complex protein 1 subunit alpha A                      |                                                                                                                  |                                                                                                                                 | IACLDLFLQK,LLEVEHPAAK,GDVTI<br>TNDGATILK,LGVQVVITDPEK,IIGIN<br>GDYFANMVDVAVLAVK,TSASILR,V<br>LCELADLQDK,QAGVFEPTIVK,ILAT<br>GANVILTTGGIDDMCLK,FATEAAITI<br>LR,WIGLDLVHKG,SLHDALCVVK,IC<br>DDELILIK,HGSYENAVHSGALDD,AF<br>HNEAQVNER,IHPTSVISGYR |

|               |        |       |                                                  |                                                                                                                                                                                                                                                                                                                                                                                                                                          |                                                                                                                                                                                                               |
|---------------|--------|-------|--------------------------------------------------|------------------------------------------------------------------------------------------------------------------------------------------------------------------------------------------------------------------------------------------------------------------------------------------------------------------------------------------------------------------------------------------------------------------------------------------|---------------------------------------------------------------------------------------------------------------------------------------------------------------------------------------------------------------|
| IPI00459493.5 | P11983 | Tcp1  | Isoform 1 of T-complex protein 1 subunit alpha B | IACLDFSLQK,SQNVMAAASIANIV<br>K,YFVEAGAMAVR,SLLVIPNTLAV<br>NAAQDSTDLVAK,GDVTITNDGAT<br>ILK,EQLAIAEFAR,EQLAIAEFARS<br>LLVIPNTLAVNAAQDSTDLVAK,IIG<br>INGDYFANMVVDAVLAVK,TSASII<br>LR,LGVQVVITDPEK,ILATGANVIL<br>TTGGIDDMYLK,EVGDGTTSVVIIA<br>AELLK,SVVPGGGAVEAALSIYLE<br>NYATSMGSR,VLCELADLQDKEV<br>GDGTTSVVIAAELLK,YINENLIINT<br>DELGR,LGVQVVITDPEKLDQIR,F<br>ATEAAITILR,SLHDALCVVK,ICDD<br>ELILIK,AFHNEAQVNPER,IHPTSV<br>ISGYR,YPVNSVNILK | IACLDFSLQK,LLEVEHPAAK,GDVTI<br>TNDGATILK,LGVQVVITDPEK,IIGIN<br>GDYFANMVVDAVLAVK,TSASII LR,<br>VLCELADLQDK,<br>QAGVFPEPTIVK,SSFPGVGLDK,FAT<br>SLHDALCVVK,WIGLDLV<br>HGSYENAVHSGA<br>IHPTSVISG<br>YR,YPVNSVNILK |
| IPI00331660.5 | Q8K3F7 | Tdh   | L-threonine 3-dehydrogenase, mitochondrial       | VLITGGLGQLGVGLANLLR,LFVP<br>STIGAFGPTSPR,HDFDLPELVAT<br>MLNFHGVSTR,DNVILSDIR,DVNI<br>TGLHNVLDVAAEYNVR,YPGIISA<br>DSQPGGGTTDYAVQIFHAAAK                                                                                                                                                                                                                                                                                                   | VLITGGLGQLGVGLANLLR,LFVPSTI<br>GAFGPTSPR,DNVILSDIR,QAI AES<br>WPMILDDSNAR,NPAPDL CIQR, YPG<br>IISADSQPGGGTTDYAVQIFHAAAK                                                                                       |
| IPI00875068.1 | Q52L67 | Tecr  | Gpsn2 protein                                    | LPVGTATLYFR,LLETLFVHR                                                                                                                                                                                                                                                                                                                                                                                                                    |                                                                                                                                                                                                               |
| IPI00457624.2 |        | Tet3  | hypothetical protein LOC194388                   |                                                                                                                                                                                                                                                                                                                                                                                                                                          | DPNTCGASFSFGCSWSMYFNGCK,<br>SLLDTPAK,SMAMEGGQGRPR,QEP<br>IDPLTQAESIPR                                                                                                                                         |
| IPI00458057.3 | Q3URQ0 | Tex10 | Tex10 protein                                    | LVQLLYFLPTLPADLLSQLSR,NPE<br>LSTQLIDIIHTAASQANK,VLDILLE<br>HYPALITGR,LIQMQPNR                                                                                                                                                                                                                                                                                                                                                            | NPELSTQLIDIIHTAASQANK,ASPEE<br>LPVVGQLLR,EPLQVMQQVLNVISLL<br>WK,WLAGLPLQLSYLGSR,LA AVQL<br>LQFLAPK                                                                                                            |
| IPI00124700.1 | Q62351 | Tfrc  | Transferrin receptor protein 1                   | VEYHFLSPYVSPR,LTTDFHNAEK<br>,VVLGTSNFK,AGEITFAEK,DALG<br>AGVAAK,HIFWGSGSHTLSALVEN<br>LK,SSVGTGLLLK,AFTYINL DK,TA<br>AEVAGQLIIK,LELSQNNVK,LDT<br>YEALTQK,DESLAYYIENQFHEFK,<br>YVVVGAQR,LNSIEFADTIK,ILNIF<br>GVIK,SAFSNLFGGEPLSYTR,VAN<br>AQSFNAIGVLIYMDK                                                                                                                                                                                  |                                                                                                                                                                                                               |

|               |        |          |                                                                |                                                                                                                                                                                                                                                                                 |                                                                |                                                                                            |
|---------------|--------|----------|----------------------------------------------------------------|---------------------------------------------------------------------------------------------------------------------------------------------------------------------------------------------------------------------------------------------------------------------------------|----------------------------------------------------------------|--------------------------------------------------------------------------------------------|
| IPI00114407.2 | O08583 | Thoc4    | Isoform 1 of THO complex subunit 4                             | SLGTADVHFER,PMNIQLVTSQIDTQR,<br>WQHDLFDSGFGGGAGVETGGK,NSK<br>QQLSAEELDAQLDAYNAR,QQLSAEEL<br>DAQLDAYNAR,KADALK,QYNGVPLDGLL<br>RPMNIQLVTSQIDTQR,QQLSAEELDA<br>QLDAYNARMDTS,NSKQQLSAEELDA<br>QLDAYNARMDTS,LLVSNLDFGVSDAD<br>IQELFAEFGTLK,LLVSNLDFGVSDADI<br>QELFAEFGTLK,MDMSLDDIIK | LLVSNLDFGVSDADIQELFAEFGT<br>LK,LLVSNLDFGVSDADIQELFAE<br>GTLKK  | SLGTADVHFER,PMNIQLVTSQIDTQ<br>R,RPAQSINR,LLVSNLDFGVSDADI<br>QELFAEFGTLK                    |
| IPI00322150.8 | Q8C1A5 | Thop1    | Thimet oligopeptidase                                          |                                                                                                                                                                                                                                                                                 | LSLLCIDFNK,ALTTQLIEQTK,ALA<br>DVEVTVYTVQR,EELGGLPEDFLSS<br>LEK | NILDFPQHVSPCK,ALTTQLIEQTK,E<br>ELGGLPEDFLSSLEK,EYFPMQVVT<br>R,TSQTVATFLDELAQK              |
| IPI00556768.1 | Q569Z6 | Thrap3   | Thyroid hormone receptor-associated protein 3                  |                                                                                                                                                                                                                                                                                 | SIFQHIQSAQSQR,EESAASGGAA<br>YSK,SPSELFAQHIVTIVHHVK             | SIFQHIQSAQSQR,KSPEIHR,SPSEL<br>FAQHIVTIVHHVK                                               |
| IPI00467123.2 | Q9R1X4 | Timeless | Isoform 1 of Protein timeless homolog                          |                                                                                                                                                                                                                                                                                 |                                                                | QQLGAAQILQSDLLPILTQHR,QAAQ<br>ELSVHRRSVLNVR,EAASWARR                                       |
| IPI00134484.1 | P62075 | Timm13   | Mitochondrial import inner membrane translocase subunit Tim13  |                                                                                                                                                                                                                                                                                 | LDPGAIMEQVK,VQIAVANAQELL<br>QR                                 |                                                                                            |
| IPI00132169.1 | P62077 | Timm8b   | Mitochondrial import inner membrane translocase subunit Tim8 B |                                                                                                                                                                                                                                                                                 | FAQIVQK,LVAAEQQK,FIDTTLAIT<br>GR                               |                                                                                            |
| IPI00125513.1 | Q9WV98 | Timm9    | Mitochondrial import inner membrane translocase subunit Tim9   |                                                                                                                                                                                                                                                                                 | FQEYHIQQNEALAAK,AGLLGQPR<br>,EVKPEEVTCEHCLQK                   |                                                                                            |
| IPI00221741.1 | Q8BH58 | Tip1     | TIP41-like protein                                             | IANLMHVPPSLFTEPNEISQYLPIK,FFE<br>EVLLFEDELHDHGVSSLSVK                                                                                                                                                                                                                           |                                                                |                                                                                            |
| IPI00874522.1 |        | Tjp1     | 195 kDa protein                                                | VAMVNGVSMDNVEHAFVQQLR,DDI<br>SEIQSLASDHSGR,AEQLASVQYTLPK,<br>AHSSTQPPEFDSGVETFSVHTDKPK,V<br>NNVDFTNIIR,YEVSSYTDQFSR,DNPH<br>FQSGETSIVISDVLK,LPEPQKQVKPP<br>EDIVR,EAGFLRPVTIFGPIADVAR,LNY<br>AQWYPIVVFLNPDSK,IVESDVGDSFYI<br>R,EEAVLFLLDLPK,FHNHLLPSETVHK<br>PELSSK              |                                                                |                                                                                            |
| IPI00323349.2 | Q9Z0U1 | Tjp2     | Tight junction protein ZO-2                                    | EDAVLYLLEIPK,GFEVIEEFDGR,VFLR<br>PSPEDAIIYGPNTK,LATELPDLFQTAK<br>,VVMVNGTPMEDVLHSAVQQLR,QQ<br>YSDQDYHSSTEK,PILKPSTPVPMPES<br>EEVGESTEEQEDAPR,SYHEAYEPDY<br>GGGYSPSYDR                                                                                                           | GETVTILAQSR,SSEPVQHEENIR,<br>LQLVVLR                           | AVDLLNYTQWFPVIVFFNPDSR,MSY<br>LTAMGADYLSCDLR,LATELPDLFQ<br>TAK,INGTVTENMSLTDAR,KGDSV<br>LR |



|               |        |     |               |                                                                                                                                                                                                                                                                       |                                                                                                                                                                                                                                                                                                                                                                                                                                                                             |                                                                                                                                                                                                              |
|---------------|--------|-----|---------------|-----------------------------------------------------------------------------------------------------------------------------------------------------------------------------------------------------------------------------------------------------------------------|-----------------------------------------------------------------------------------------------------------------------------------------------------------------------------------------------------------------------------------------------------------------------------------------------------------------------------------------------------------------------------------------------------------------------------------------------------------------------------|--------------------------------------------------------------------------------------------------------------------------------------------------------------------------------------------------------------|
| IPI00137409.3 | P40142 | Tkt | Transketolase | <p>DAIVQAVK,SKDDQVTVIGAGVTLHEAL<br/> AAAESLK,GHAAPILYAVWAEAGFLPE<br/> AELLNLR,ILTVEDHYEYEGGIGEAVSAA<br/> VVGEPGVTVTR,TSRPENAIYSSNNEDF<br/> QVGQAK,AVELAANTK,ILATPPQEDAP<br/> SVDIANIR,VLDPFITIKPLDR,GITGIEDK,<br/> NMAEQIIQEIYSQVQSK,LDNLVAIFDIN<br/> R,IIALDGDTK</p> | <p>MFGIDKDAIVQAVK,TSRPENAIY<br/> SSNEDFQVGQAK,AVELAANTK,I<br/> SSDLDGHPVVK,VLDPFITIKPLDR,<br/> HQPTAIIAK,TVPFCSTFAAFFTR,L<br/> DNLVAIFDINR,IIALDGDTK,KISSD<br/> LDGHPVVK,SKDDQVTVIGAGVTL<br/> HEALAAAESLK,ILTVEDHYEYEGGI<br/> GEAVSAAVVGEPGVTVTR,GHAA<br/> PILYAVWAEAGFLPEAELLNLR,IL<br/> ATPPQEDAPSVDIANIR,FIETYIAE<br/> QNMVSIAVGCATR,GITGIEDK,KLI<br/> LDSAR,NMAEQIIQEIYSQVQSK,L<br/> GQSDPAPLQHQQVDIYQK,SKDDQ<br/> VTVIGAGVTLHEALAAAESLKK,LA<br/> VSQVPR,EAWHGKPLPK</p> | <p>GHAAPILYAVWAEAGFLPEAELLN<br/> R,AVELAANTK,ISSDLDGHPVVK,IL<br/> ATPPQEDAPSVDIANIR,HQPTAIIAK<br/> ,LGQSDPAPLQHQQVDIYQK,NMAEQI<br/> IQEIYSQVQSK,TVPFCSTFAAFFTR,<br/> SGKPAELLK,LAVSQVPR,EAWHGK<br/> PLPK</p> |
|---------------|--------|-----|---------------|-----------------------------------------------------------------------------------------------------------------------------------------------------------------------------------------------------------------------------------------------------------------------|-----------------------------------------------------------------------------------------------------------------------------------------------------------------------------------------------------------------------------------------------------------------------------------------------------------------------------------------------------------------------------------------------------------------------------------------------------------------------------|--------------------------------------------------------------------------------------------------------------------------------------------------------------------------------------------------------------|

|               |        |      |         |                                                                                                                                                                                                                                                                                                                                                                                                                                                                                                                            |                                                                                                                                                                                                                                              |
|---------------|--------|------|---------|----------------------------------------------------------------------------------------------------------------------------------------------------------------------------------------------------------------------------------------------------------------------------------------------------------------------------------------------------------------------------------------------------------------------------------------------------------------------------------------------------------------------------|----------------------------------------------------------------------------------------------------------------------------------------------------------------------------------------------------------------------------------------------|
| IPI00465786.3 | P26039 | Tln1 | Talin-1 | <p>KSTVLQQQYNR,GVGAATAVTQ<br/> ALNELLQHVK,ISIGNVVK,EVANS<br/> TANLVK,ALEATTEHIR,TLAESAL<br/> QLLYTAK,AIAVTVQEMVTK,TYGV<br/> SFFLVK,VQELGHGCSALVTK,AL<br/> STDPASPVLK,VLVQNAAGSQEK,<br/> LAQAAQSSVATITR,NLGTALAE<br/> R,DPVQLNLLYVQAR,GTEWVDP<br/> EDPTVIAENELLGAAAAIEAAAK,G<br/> VAALTSDDPAVQAVLDTASDVLDK<br/> ,LGAASLGAEDPETQVVLINAVK,A<br/> AAFEDQENETVVVK,LLAALLEDE<br/> GGNGRPLLQAAK,PAAVAAENEEI<br/> GAHIK,KLEQLK,EVIQEWSLTNIK,<br/> TSTPEDFIR,ALGDLISATK,EADES<br/> LNFEQILEAAK,ILAQATSDLVNAI<br/> K,SIAAATSALVK</p> | <p>GVGAAATAVTQALNELLQHVK,AVT<br/> QALNR,TLAESALQLLYTAK,AATAP<br/> LLEAVDNLSAFASNPEFSSVPAQIS<br/> PEGR,KLEQLK,APGQLECEIAAAL<br/> NSCLR,GTEWVDPEDPTVIAENELL<br/> GAAAAIEAAAK,GVAALTSDDPAVQAV<br/> LDTASDVLDK,GAAHPDSEEQQ<br/> QR,TSTPEDFIR</p> |
|---------------|--------|------|---------|----------------------------------------------------------------------------------------------------------------------------------------------------------------------------------------------------------------------------------------------------------------------------------------------------------------------------------------------------------------------------------------------------------------------------------------------------------------------------------------------------------------------------|----------------------------------------------------------------------------------------------------------------------------------------------------------------------------------------------------------------------------------------------|

|               |        |         |                                                               |                                                                                             |                                            |                                                                      |
|---------------|--------|---------|---------------------------------------------------------------|---------------------------------------------------------------------------------------------|--------------------------------------------|----------------------------------------------------------------------|
| IPI00875190.2 |        | Tm9sf4  | 82 kDa protein                                                |                                                                                             | ITEEYVHLIADNLPVATR,LGFTD<br>VNK            |                                                                      |
| IPI00466570.4 | Q9D1D4 | Tmed10  | Isoform 1 of Transmembrane emp24 domain-containing protein 10 |                                                                                             | IPDQLVILDMK,DLLVTGAYEITDQ<br>SGGAGGLR      |                                                                      |
| IPI00131606.2 | P52875 | Tmem165 | Transmembrane protein 165                                     |                                                                                             | LLNGPDVETGTSTAIPQKK,SQLT<br>TIVLAAR        |                                                                      |
| IPI00119478.1 | Q9JHJ0 | Tmod3   | Tropomodulin-3                                                | DLGDYKDLDEDELLGK,QLETVLDLDD<br>PENALLPAGFR,SNDPVAVAFADMLK                                   |                                            |                                                                      |
| IPI00828976.1 | Q3UCI5 | Tmpo    | thymopoietin isoform epsilon                                  | GPPDFSSDEEREPTPVLGSGASVGR,<br>LEDKDDLDTVELSNEELLQVLR,IDGA<br>VISESTPIAETIK,HASSILPITEFSDITR | NRPLAAGANSK,DVYVQLYLQH<br>LTAR,ASSNESLVANR | IDGAVISESTPIAETIK,HASSILPITEF<br>SDITR,YGVNPGPIVGTTR,ASSNES<br>LVANR |

|                |          |         |                                                          |                                                                                                                             |                                                                                                                                 |
|----------------|----------|---------|----------------------------------------------------------|-----------------------------------------------------------------------------------------------------------------------------|---------------------------------------------------------------------------------------------------------------------------------|
| IPI00896574.1  | B2RUB9   | Tmpo    | thymopoietin isoform alpha                               | LEDKDDLDVTELSNEELLDQLVR,GPP<br>DFSSDEEREPTPVLGSGASVGR,VDD<br>EILGFISEATPR                                                   | YGVNPGPIVGTTTR,DCVPFSELAST<br>PSGAFFQGISFPEISTRPPLGR                                                                            |
| IPI00754323.1  | Q9WUU8-3 | Tnip1   | Isoform 3 of TNFAIP3-interacting protein 1               | NQSSQVMDPPPDRPAEPEPADLR,YL<br>QDQLSPLTR                                                                                     |                                                                                                                                 |
| IPI00221523.4  | Q8BFY9   | Tnp1    | Isoform 1 of Transportin-1                               | DELLPHILPLLK,ATVGILITTIASK,<br>ALVMLLEVR,TLLENTAITIGR,YS<br>IDIILLK                                                         | MEYEWKPEQGLQQILQLLK,FLQF<br>FK,SLSGLILK,GELQNWPDLLPK,TL<br>LENTAITIGR,FSDQFPLPK,LGYVC<br>PQEVAPMLQQFIRPWCTSLR                   |
| IPI00337947.10 | B1ATC3   | Tnrc6c  | trinucleotide repeat containing 6C                       | YDLIQNSESPASPPVAVPHSWSR,KND<br>NGTEAWGSIATQPSNSGGK                                                                          |                                                                                                                                 |
| IPI00353237.8  | Q5SSZ5   | Tns3    | Isoform 1 of Tensin-3                                    | YVQFLSGLLSGAMK,HVVPAQVHVNG<br>DAALKDR,FPDYGKIELVFSATPEK,ST<br>VDNTGLAQPPHIPVTPNR                                            |                                                                                                                                 |
| IPI00652758.1  | Q3UDC3   | Tom1    | target of myb1 homolog isoform 2                         | LPNLASPSAEGPPRPSPGTAPR,YEAP<br>QTTDGLAGALDAR                                                                                |                                                                                                                                 |
| IPI00315135.3  | Q9CPQ3   | Tomm22  | Mitochondrial import receptor subunit TOM22 homolog      | SAAGATFDLSLFAQK,LQMEQQ<br>QQLQQR,AEAEKAELEEEDDDD<br>ELDETLSE                                                                |                                                                                                                                 |
| IPI00165694.1  | Q9CYG7   | Tomm34  | Isoform 1 of Mitochondrial import receptor subunit TOM34 | SSLSDISSLLQIEPR,TVLQIDNSVASAL<br>EGINR                                                                                      | SSLSDISSLLQIEPR,LPPIVVPVSA<br>QK,TVLQIDNSVASALEGINR,LKLPP<br>IPVVPVSAQK                                                         |
| IPI00474157.4  | Q9QYA2   | Tomm40  | Mitochondrial import receptor subunit TOM40 homolog      |                                                                                                                             | LPPLPLTSLCAFLNHR,KLPLPLTL<br>SLCAFLNHR                                                                                          |
| IPI00133289.1  | Q9D173   | Tomm7   | Mitochondrial import receptor subunit TOM7 homolog       | GGQFAIR,GADPGMPEPSVLSLL<br>WG                                                                                               |                                                                                                                                 |
| IPI00751137.1  | Q3TSX8   | Tomm70a | Putative uncharacterized protein                         | ATFYLLIGSANAAPDLDK,LLQL<br>QWK,AAAFEQLQK,ILLDLVEEAVA<br>DFDACIR,YMAEALLLR,NVDLSTF<br>YQNR,NREPLMPSPQFIK,SDEDK<br>DKEGEALEVK |                                                                                                                                 |
| IPI00109764.2  | Q04750   | Top1    | DNA topoisomerase 1                                      | VEHINLHPELDGQEYVVEFDFFPGK,GP<br>VFAPPYEPLPESVK                                                                              | LEVQATDREENK,LNTGILNK,LRD<br>EDDADYKPK,AEEVATFFAK,AVA<br>LYFIDK,VEHINLHPELDGQEYVVE<br>ILNK,QIALGTSK<br>FDFFPGK,GPVFAPPYEPLPESVK |

|               |        |         |                             |                                                                                                                                  |                                                                                                                                                                                                                                                                                                                                                                                                                                                                                                                                                                                    |                                                                                                                                                                                                          |
|---------------|--------|---------|-----------------------------|----------------------------------------------------------------------------------------------------------------------------------|------------------------------------------------------------------------------------------------------------------------------------------------------------------------------------------------------------------------------------------------------------------------------------------------------------------------------------------------------------------------------------------------------------------------------------------------------------------------------------------------------------------------------------------------------------------------------------|----------------------------------------------------------------------------------------------------------------------------------------------------------------------------------------------------------|
| IPI00122223.1 | Q01320 | Top2a   | DNA topoisomerase 2-alpha   | YDTVLDILR,IFDEILVNAADNK,FLEEFITPIVK                                                                                              | KVLFTCFKR,EKQDEQVGLPGK,D<br>KVDETGNSLK,SENVETPAEDG<br>AEPGSLR,TLAVSGLGVVGR,EDL<br>AVFIEELEVVEAK,VIPQVTVEMK,I<br>VIENKPK,IFDEILVNAADNK,AKGE<br>EQDFPVDLEDTIAPR,VIHEQVNP<br>R,AAIGCGIVESILNWWK,KYDTVL<br>DILR,NSTECTLILTEGDSAK,KLLG<br>LPEDYLYGQSTSYLTYNDFINK,R<br>AYDIAGSTK,TPSLITDYR,GFQQIS<br>FVNSIATSK,IKSENVETPAEDG<br>AEPGSLR,ELILFNSDNER,IYVP<br>ALIFGQLLTSSNYDDDEKK,SYVD<br>LYLK,NEKEQELNTLK,IMIMTDQD<br>QDGSNIK,HVDYVADQIVSK,YIFT<br>MLSPLAR,YGVFPLR,YDTVLDILR,<br>IYVPALIFGQLLTSSNYDDDEK,AY<br>DIAGSTK,SFGSTCQLSEK,VTIDP<br>ENNVISIWNNKG,FTVETASR,LCN<br>IFSTK,FLEEFITPIVK | EVTFVPGLYK,IYVPALIFGQLLTSSN<br>YDDDEKK,DKVDETGNSLK,EVVNNI<br>R,QTTLPPFKPVK,TLAVSGLGVVGR,I<br>VIENKPK,AAIGCGIVESILNWWK,YG<br>VFPLR,GFQQISFVNSIATSK,VLFTC<br>FK,VTIDPENNVISIWNNKG,FTVETA<br>SR,FLEEFITPIVK |
| IPI00625441.3 |        | Tpd52   | tumor protein D52 isoform 1 | VEEEIQTLTSLVLAQK,LGSSSLQEFK,EL<br>TKVEEEIQTLTSLVLAQK,GWQDVTATN<br>AYK,ASAAFSSVGSVITK,TEPVAEEGE<br>DAVTMLSAPEALTEEEQEELRR         | TSETLSQAGQK,LGSSSLQEFK,VEE<br>EIQTLTSLVLAQK,HLAELKR                                                                                                                                                                                                                                                                                                                                                                                                                                                                                                                                |                                                                                                                                                                                                          |
| IPI00309878.4 | B2RUC1 | Tpd52l1 | Tpd52l1 protein             | AELIQLEDEITTLR,LGMNLMNELK                                                                                                        |                                                                                                                                                                                                                                                                                                                                                                                                                                                                                                                                                                                    |                                                                                                                                                                                                          |
| IPI00755183.1 | A2AUD5 | Tpd52l2 | Tumor protein D52-like 2    | GVLSDFMVDVDPVDPGVVHR,SWHDV<br>QVSTAYVK,TPVVEGLTEGEEELRAE<br>LAK,LGLSTLGELEK,TPVVEGLTEGEE<br>ELR,TSALSTMGSAISR                    |                                                                                                                                                                                                                                                                                                                                                                                                                                                                                                                                                                                    |                                                                                                                                                                                                          |
| IPI00467833.5 | P17751 | Tpi1    | Triosephosphate isomerase   | VVLAYEPVWAIGTGK,VIADNVK,ELAS<br>QPDVDGFLVGGASLKPEFVDIINAK,DL<br>GATWVVLGHSER,VVFEQTK,HVFGES<br>DELIGQK,EAGITEK,TATPQQAQEVHE<br>K | VVLAYEPVWAIGTGK,SNVNDGV<br>AQSTR,VIADNVK,IAVAAQNCYK,<br>ELASQPDVDGFLVGGASLKPEFV<br>STR,IAVAAQNCYK,ELASQPDVDGF<br>LVGGASLKPEFVDIINAK,IYGGSVT<br>GATCK,VTNGAFTGEISPGMIK,TAT<br>EGLGVIACIGEK,HVFGESDELIGQ<br>PQQAQEVHEK<br>K,TATPQQAQEVHEK                                                                                                                                                                                                                                                                                                                                            |                                                                                                                                                                                                          |
| IPI00831423.1 |        | Tpm1    | 29 kDa protein              | RIQLVEEELDR,LATALQKLEEAKEAAD<br>ESER,ETAADVASLNR,IQLVEEELDR,<br>LVIIESDLR,SLQEQADAAEER,RIQLV<br>EEELDRAQER,SIDDELELYAQK          |                                                                                                                                                                                                                                                                                                                                                                                                                                                                                                                                                                                    |                                                                                                                                                                                                          |

|               |          |      |                                         |                                                                                                                                                                                                                                                   |                                                                                          |
|---------------|----------|------|-----------------------------------------|---------------------------------------------------------------------------------------------------------------------------------------------------------------------------------------------------------------------------------------------------|------------------------------------------------------------------------------------------|
| IPI00403987.2 | Q8BP43   | Tpm1 | tropomyosin 1, alpha isoform 5          | RIQLVEEELDR,LATALQKLEEAKEAAD<br>ESER,GTEDELDKYSEALKDAQEK,QL<br>EDELVSLQK,IQLVEEELDR,LVIIESDLE<br>R,RIQLVEEELDRAQER,SIDDELELY<br>AQK,GTEDELDKYSEALK                                                                                                | KYEEVAR,QLEDELVSLQK,IQLVEE<br>ELDR,AELSEGQVR                                             |
| IPI00874728.1 | P58774-2 | Tpm2 | Isoform 2 of Tropomyosin beta chain     | RIQLVEEELDR,LATALQKLEEAKEAAD<br>ESER,KLVILEGELER,IQLVEEELDR,E<br>ENVEIHQTLTDQTLLELNNL,RIQLVEEE<br>LDRAQER,LVILEGELER,TIDDEETLA<br>SAK                                                                                                             |                                                                                          |
| IPI00459570.1 | Q8C7C3   | Tpm3 | Putative uncharacterized protein        | RIQLVEEELDR,LVIIEGDLERTEER,LA<br>TALQKLEEAKEAADESER,EQAEAEVA<br>SLNR,IQVLQQQADDAEERAER,IQLVE<br>EELDR,RIQLVEEELDRAQER,AISDEL<br>DHALNDMTSI,TIDDELELYAQK,KLVII<br>EGDLER,LVIIEGDLER,LVIIEGDLERTE<br>ERAELAESR,ALKDEEKMELQEIQLK,K<br>IQVLQQQADDAEER | YSQKEDKYEIIIK,EQAEAEVASL<br>NR,IQLVEEELDR,KLVIIEGDLER,L<br>VIIEGDLER,KIQVLQQQADDAEE<br>R |
| IPI00230044.5 | P21107-2 | Tpm3 | Isoform 2 of Tropomyosin alpha-3 chain  |                                                                                                                                                                                                                                                   | YSQKEDKYEIIIK,EQAEAEVASL<br>NR,IQLVEEELDR,KLVIIEGDLER,L<br>VIIEGDLER,KIQVLQQQADDAEE<br>R |
| IPI00278611.7 | P21107   | Tpm3 | Isoform 1 of Tropomyosin alpha-3 chain  | RIQLVEEELDR,LVIIEGDLERTEER,LA<br>TALQKLEEAKEAADESER,GTEDELDK<br>YSEALKDAQEK,TIDDELELYAQK,KL<br>VIIEGDLER,IQLVEEELDR,LVIIEGDLE<br>R,RIQLVEEELDRAQER,AISDELHAL<br>NDMTSI,GTEDELDKYSEALK,ALKDEE<br>KMELQEIQLK                                        | KLVIIEGDLER,LVIIEGDLER                                                                   |
| IPI00169707.2 |          | Tpm3 | Tropomyosin 3, gamma                    | LVIIEGDLERTEER,RIQLVEEELDR,LA<br>TALQKLEEAKEAADESER,MLDQTLDD<br>LNEM,GTEDELDKYSEALKDAQEK,KL<br>VIIEGDLER,IQLVEEELDR,LVIIEGDLE<br>R,RIQLVEEELDRAQER,LVIIEGDLERT<br>EERAELAESR,GTEDELDKYSEALK,AL<br>KDEEKMELQEIQLK                                  | KLVIIEGDLER,LVIIEGDLER                                                                   |
| IPI00421223.3 | Q6IRU2   | Tpm4 | Tropomyosin alpha-4 chain               | RIQLLEEELDR,LVILEGELK,AQEQLAT<br>ALQNLEEA EK,AMKDEEKMEILEMQLK<br>,KIQALQQQADDAEDRAQGLQR,IQLLE<br>EELDR,MEILEMQLK,IQALQQQADDAE<br>DRAQGLQR,KLVILEGELK                                                                                              | KYEEVAR,AQEQLATALQNLEEA EK,<br>EENVGLHQTLTDQTLNELNCI                                     |
| IPI00469194.2 | Q64514   | Tpm2 | Isoform Long of Tripeptidyl-peptidase 2 |                                                                                                                                                                                                                                                   | IPANWTNPLGK,SWVQTLRPVNAK,<br>GTLIEAFPVLGGK                                               |

|               |        |        |                                                 |                                                                           |                                                                                                                                                                                                                                                                                                                                                                                                                                                  |                                                                                                                                                  |
|---------------|--------|--------|-------------------------------------------------|---------------------------------------------------------------------------|--------------------------------------------------------------------------------------------------------------------------------------------------------------------------------------------------------------------------------------------------------------------------------------------------------------------------------------------------------------------------------------------------------------------------------------------------|--------------------------------------------------------------------------------------------------------------------------------------------------|
| IPI00880644.1 | Q7M739 | Tpr    | Translocated promoter region, isoform CRA_b     | QGNLLLTNLQTIQGILER,DDVDDLKSQ<br>LRQAEQVNDLK                               | TDELLALGR,ELQELQDSLNVRL<br>AVAEVR,NQQLINQQK,LDELQAS<br>DVAVK,DAVQAPLNVSLNEEGK,S<br>QEQILEILR,LSQEVEYLTEDVKR,<br>FKVESEQQYFEIEK,LKESAEFQT<br>QLEK,ISTQLDFASK,LEHEISHLK,<br>NIEELQQQNQR,KLLEEDVKR,VLL<br>MELEEAR,SLEGQVENLQK,ASTA<br>LSNEQQAR,QGNLLLTNLQTIQGI<br>LER,IQQLNEEVGR,FEVAQVESL<br>R,TLSTVQNEVQEALQR,LQEQVT<br>DLR,TSTSNVEQYR,ELENANDLL<br>SATK,KLENEVEQR,VELLER,YLD<br>EIVK,LEHEISHLKK,FHNELNAHIK,<br>HVEDLLTK,NLDVQLLDTK,LLHDDQ<br>IEK | LTELYNAYVETQDQLLLEK,NQQLIN<br>QQK,NLGIQSQFTR,QGNLLLTNLQT<br>IQGILER,EIEELK,RPPHPLPPR,TL<br>TVQNEVQEALQR                                          |
| IPI00316430.4 | Q3TQN1 | Tpst2  | tyrosylprotein sulfotransferase 2               | PEQEELVMLGADHVEYRYGK,WNKAI<br>EVMYAQCMEVGR                                |                                                                                                                                                                                                                                                                                                                                                                                                                                                  |                                                                                                                                                  |
| IPI00420481.5 | A2APB8 | Tpx2   | TPX2, microtubule-associated protein homolog    | ALPVPHFDTINLPEK,SLAENPSGSLVQ<br>EPFQLATER,TFDEAASTYVPIAQQVE<br>AFHK       |                                                                                                                                                                                                                                                                                                                                                                                                                                                  |                                                                                                                                                  |
| IPI00377298.2 |        | Tra2a  | transformer-2 alpha                             | GFAFVYFER,YGPLSGVNVVYDQR,AN<br>PDPNTCLGVFGLSLYTTER                        | GFAFVYFER,MSDVEENNFEGR                                                                                                                                                                                                                                                                                                                                                                                                                           |                                                                                                                                                  |
| IPI00139259.1 | P62996 | Tra2b  | Isoform 1 of Transformer-2 protein homolog beta | YGPIADVSIVYDQQR,GFAFVYFENV<br>DDAK,ANPDPNCCLGVFGLSLYTTER,<br>RPHPTPGIYMGR | AAQDRDQIYR,YGPIADVSIVYDQ<br>QSR,GFAFVYFENVDDAK                                                                                                                                                                                                                                                                                                                                                                                                   |                                                                                                                                                  |
| IPI00850286.1 |        | Trank1 | similar to hCG2042887, isoform 4                |                                                                           |                                                                                                                                                                                                                                                                                                                                                                                                                                                  | LSAPEAGPPRR,KNDALLLAWNK,K<br>KIILAIQQLGNGEWTQGLQK                                                                                                |
| IPI00132762.1 | Q9CQN1 | Trap1  | Heat shock protein 75 kDa, mitochondrial        |                                                                           | LDTHPAMVTVLEMGAAR,LRDVL<br>QQR,AQLLQPTLEINPR,DISEFQH<br>EEFYR,LNDLLVK,ESEPELAQLLV<br>DQIYENAMIAAGLVDDPR,EGIVTT<br>AEQDIK,GVVDSIEDIPLNLSR,AFL<br>EALQNQAETSSK,YSNFVSFPLYL<br>NGK,TDAPLNIR,YESSALPAGQLT<br>SLPDYASR,ELLQESALIR,LISVET<br>DIVVDHYKEEK,LISVETDIVVDHY<br>K,LVCEGQVLPMEIHLQTDAAK,EL<br>ISNASDALEK,KGTTIQDTGIGMT<br>QEELVSNLGTIAR,EGIVTTAEQDI<br>KEDIAK,SAAPESPGYQWLSDGGS<br>GVFEIAEASGVRPGTK,LLDIVAR                                   | AQLLQPTLEINPR,KLCQLR,VEVYS<br>R,ESEPELAQLLVQIYENAMIAAGL<br>VDDPR,AFLEALQNQAETSSK,GVV<br>DSEDIPLNLSR,HEFQAETK,ELLQE<br>SALIR,YESSALPAGQLTSLPDYASR |

|               |          |        |                                                           |                                                                                                                                                                                                                                                                                                                                                                                                                       |                                                                                                                                                                                                                                                                                                                                                                                                             |
|---------------|----------|--------|-----------------------------------------------------------|-----------------------------------------------------------------------------------------------------------------------------------------------------------------------------------------------------------------------------------------------------------------------------------------------------------------------------------------------------------------------------------------------------------------------|-------------------------------------------------------------------------------------------------------------------------------------------------------------------------------------------------------------------------------------------------------------------------------------------------------------------------------------------------------------------------------------------------------------|
| IPI00131130.1 | Q64127   | Trim24 | Isoform Long of Transcription intermediary factor 1-alpha | LESYFEELLK,VPVVMLEPIR,FPTQISL<br>AQLR,QNPVVEQSSQPPGGLPSNQLS<br>K,MQGPIQQPSISHQHPPPR,YQFIEEA<br>FQNQK                                                                                                                                                                                                                                                                                                                  |                                                                                                                                                                                                                                                                                                                                                                                                             |
| IPI00312128.3 | Q62318   | Trim28 | Isoform 1 of Transcription intermediary factor 1-beta     | DHQYQFLEDAVR,EEDGSLSLDGADS<br>TGVVAK,PLHQLATDSTFSMEQPGGTL<br>DLTLIR,QGSGSSQPMEVQEGYGFSG<br>DDPYSSAEPHVSGMK,LDLDTSDSQ<br>PPVFK,FQWDLNAWTK,RPAASSAAAA<br>SAAASSPAGGGGEAQELLEHCGVCR,<br>VFPSTTETYDNLIVIER,PVLMPLTEGP<br>GAEGPR,DCQLNAHKDQYQFLEDAV<br>R,ADVQSIIGLQR,LSPPYSSPQEFAD<br>VGR,IVAERPNTSTGPGMAPPR,EE<br>ETEAAIGAPPAPEGPETKPVLMPLTE<br>GPGAEGPR,EEETEAAIGAPPAPEGP<br>ETK,DIVENYFMR,MAILQIMK,FASWAL<br>ESDNTALLSK | EEDGSLSLDGADSTGVVAK,DHQY<br>QFLEDAVR,LDLDTSDSQPPVFK,F<br>QWDLNAWTK,FAVLVEPPPLNLP<br>AGLSSQELSGPGDGP,RPAASSAA<br>AASAAASSPAGGGGEAQELLEHCG<br>VCR,LASPSGSTSSGLEVVAPEVTS<br>APVSGPILDDSATICR,VLVNDAQK<br>,TVYCNVHK,KLLASLVK,SERGEVS<br>GLLR,PVLMPLTEGPGAEGPR,ADV<br>QSIIGLQR,IVAERPNTSTGPGMAP<br>PPR,LSPPYSSPQEFADVGR,EEE<br>TEAAIGAPPAPEGPETKPVLMPLT<br>EGPGAEGPR,GAAAAAAGQAGTVP<br>PGAPGAPPLPGMAIVK,MAILQIMK |
| IPI00409904.1 | Q99PP7   | Trim33 | Isoform Alpha of E3 ubiquitin-protein ligase TRIM33       | NVVNLGNLVIESK,TPGQINLAQLR,QID<br>LVDNYFVK,VAIFTLININK                                                                                                                                                                                                                                                                                                                                                                 |                                                                                                                                                                                                                                                                                                                                                                                                             |
| IPI00622738.2 | Q99KW3-2 | Triobp | Isoform 2 of TRIO and F-actin-binding protein             | GWMSILDEPGEWK,VPLTALLNQAHN<br>DR,EWLLAEETAATASAIEAMK,SLAEM<br>ESSHQVMEQLQR                                                                                                                                                                                                                                                                                                                                            |                                                                                                                                                                                                                                                                                                                                                                                                             |
| IPI00229927.2 | Q8CJ53   | Trip10 | Isoform 1 of Cdc42-interacting protein 4                  | DQAHFYFSQMPQIFDK,QGAEGYVPT<br>SYLR,TVATEDFSLPPEQQR,HTQWG<br>LDLLDK,ELVAESLGIR,FSQQQSFVQL<br>LQEVNDFAGQR,YEAWLAEAESR,LGA<br>GYGLLSEAELQVPIIGK,VPSDSSLGT<br>PDGRPELR                                                                                                                                                                                                                                                    |                                                                                                                                                                                                                                                                                                                                                                                                             |
| IPI00380829.3 | B2RY51   | Trip11 | Thyroid hormone receptor interactor 11                    | AESLEGKVLSLQERLDEANAALDSAS<br>R,LDEANAALDSASRLTEQLDLK,NFG<br>QELAQQVHSIGQLCNTK                                                                                                                                                                                                                                                                                                                                        |                                                                                                                                                                                                                                                                                                                                                                                                             |
| IPI00623570.3 |          | Trip12 | thyroid hormone receptor interactor 12                    |                                                                                                                                                                                                                                                                                                                                                                                                                       | DIPVTIHNLEEYLR,IYFADAELLK,<br>LFLQFVTGSPR                                                                                                                                                                                                                                                                                                                                                                   |
| IPI00874743.1 |          | Trmt6  | 59 kDa protein                                            | MGGFGSIIQLYPGDGPVR,EIAEQADE<br>DNIVDAAENNSGEQRPMEIVPGDPEN<br>K,GEEIVQQLIENSTTFR,LLMSGGGGY<br>LLSGFTVVSDSL                                                                                                                                                                                                                                                                                                             |                                                                                                                                                                                                                                                                                                                                                                                                             |
| IPI00719897.1 | Q792Z1   | Try10  | trypsin 10                                                | TLDNDIMLIKSSPVTLNAR,KTLNDNDIM<br>LIK,TLDNDIMLIK,LGEHNINVLEGNEQ<br>FIDAANIIKHPK                                                                                                                                                                                                                                                                                                                                        | TLDNDIMLIK,LGEHNINVLEGNEQFI<br>DAANIIKHPK                                                                                                                                                                                                                                                                                                                                                                   |
| IPI00620969.2 | Q61037   | Tsc2   | Isoform G of Tuberin                                      |                                                                                                                                                                                                                                                                                                                                                                                                                       | NFVPEQYASVFAISLPYTNPSK,VLL<br>QCLK,EHGHPVQVIVSATGCTAKP<br>PTLPR,KASGPLSPPTGPPSPVPMG<br>PAVR                                                                                                                                                                                                                                                                                                                 |

|               |        |        |                                                       |                                                                                   |                                                                                                                                                                                                                                                                                                                                                                                                                                                                                                                      |
|---------------|--------|--------|-------------------------------------------------------|-----------------------------------------------------------------------------------|----------------------------------------------------------------------------------------------------------------------------------------------------------------------------------------------------------------------------------------------------------------------------------------------------------------------------------------------------------------------------------------------------------------------------------------------------------------------------------------------------------------------|
| IPI00320543.5 | Q8BMZ5 | Tsen34 | Isoform 1 of tRNA-splicing endonuclease subunit Sen34 | LGLPLLLLPEEAR,FGGDFLVYPGDPL<br>R                                                  |                                                                                                                                                                                                                                                                                                                                                                                                                                                                                                                      |
| IPI00113052.1 | Q9CZR8 | Tsfm   | Elongation factor Ts, mitochondrial                   |                                                                                   | VPSGFYVGSYVHGVTQSPSLQNLV<br>LGK,FQQLVQQVALGTMHCQNLT<br>DR                                                                                                                                                                                                                                                                                                                                                                                                                                                            |
| IPI00118729.1 | Q99NF3 | Tsga14 | Isoform 1 of Centrosomal protein of 41 kDa            | GFENLFMLSGGLK,LEDNDSATSEADA<br>EIAAK                                              |                                                                                                                                                                                                                                                                                                                                                                                                                                                                                                                      |
| IPI00664419.1 | Q5DTH5 | Tshz1  | Teashirt homolog 1                                    |                                                                                   | QLVLDPVVEEK,PLQSAVQSVQIQP<br>SYASSVK,GKQLVLDPVVEEKIQSIP<br>LPPTTHTR,QSNWNPQHLLILQAQF<br>ASSLR                                                                                                                                                                                                                                                                                                                                                                                                                        |
| IPI00124684.1 | Q62348 | Tsn    | Translin                                              |                                                                                   | KVVQSLEQTAR,EILTLLQGVBHQG<br>TGFQDIPK,VVQSLEQTAR,EAVT<br>EILGIEPDR                                                                                                                                                                                                                                                                                                                                                                                                                                                   |
| IPI00130475.1 | Q91Z38 | Ttc1   | Tetratricopeptide repeat protein 1                    | ASDDSSSELDEEYLIELEK,TDKLDEAL<br>EDYK,DLGNLVLRFGLSTENFQIK,QD<br>SSTGYSYINFVQNPNNNR |                                                                                                                                                                                                                                                                                                                                                                                                                                                                                                                      |
| IPI00466645.3 | Q62187 | Ttf1   | Transcription termination factor 1                    | LLYTDRYPEEKTITNLK,NVQDFLSLT<br>GIESADK,MYRDDLGRFK,SQELEPIPD<br>SLDDSETISER        |                                                                                                                                                                                                                                                                                                                                                                                                                                                                                                                      |
| IPI00845554.1 | A4Q9F4 | Ttll11 | Isoform 1 of Tubulin polyglutamylase TTLL11           | LKFDIRLYVLLK,NLKPMLLEVANPSM<br>R,RSAGSMRPVTVDSK                                   |                                                                                                                                                                                                                                                                                                                                                                                                                                                                                                                      |
| IPI00756257.1 | A2ASS6 | Ttn    | Isoform 1 of Titin                                    |                                                                                   | WVTCASAVQK,PEATTVSVEVQET<br>IPEK,THLTVMTDEQEDEGVYTCV<br>ATNEVGEVSSSK,PSPVITWSKKG<br>DLANR,KPEAPPPK,EVIPEKK,EAAP<br>EKK,YSVTATNSAGTATENLSVIVLE<br>K,KSEWEEVTNTAVER,RETSTAVW<br>EEIPVQEPEPEKK,FDEVTAEAMT<br>SEVSATVAR,KVSVVPPK,VEVYEK,<br>LK,KVPVPVPK,KITPEEK,EPPSFV<br>KPVPEEK,ILGYVEMQPK,NDAGM<br>QKPDPMDLTGSNVFTTSIVK,KP<br>FTQEPK,IDVPFIGR,KGFCQVNVVD<br>VPEKK<br>RPGPPVGPVIFDEVTK,SSAVLAWL<br>K,LTVTLHPPPTETTLRPMFK,KLLPE<br>PK,TPLNPPEPPSNPPEVLDVTK,VI<br>EFLEAEEVEVYEK,IELSPSMEAPK,I<br>PEAIPPK,KAEAKPK,RALQAAR |

---

|               |        |        |                        |                                                                                                                                                      |                                                                                                                                                                                                                                                                                                                                                                                                                                                                                                       |
|---------------|--------|--------|------------------------|------------------------------------------------------------------------------------------------------------------------------------------------------|-------------------------------------------------------------------------------------------------------------------------------------------------------------------------------------------------------------------------------------------------------------------------------------------------------------------------------------------------------------------------------------------------------------------------------------------------------------------------------------------------------|
|               |        |        |                        |                                                                                                                                                      | YMACCLLYR,FDGALNVDLTEFQT<br>NLVPYPR,EIIDLVLDLDR,DVNAAIATI<br>K,LSVDYGKK,TIQFVDWCPTGFK,<br>LADQCTGLQGFLVFHSGGGTG DVNAAIATIK,FDGALNVDLTEFQTN<br>SGFTSLLMER,GHYTIGK,TIGGGD LVPYPR,TIQFVDWCPTGFK,GHYTI                                                                                                                                                                                                                                                                                                    |
| IPI00110753.1 | P68369 | Tuba1a | Tubulin alpha-1A chain | EIIDLVLDL,IHFPLATYAPVISA EK,AFV<br>HWYVGEEMEEGEFSEAR,NLDIERPT<br>YTNLNR,AVFVDLEPTVIDEVR,QLFHP<br>EQLITGK,VGINYQPPTVPPGGDLAK,TI<br>GGGDDSFNTFFSETGAGK | DSFNTEFFSETGAGK,EDMAALEK,I<br>GK,TIGGGDDSFNTFFSETGAGK,IH<br>HFPLATYAPVISA EK,AFVHWYVVG<br>FPLATYAPVISA EK,AVCMLSNTTAIA<br>EGMEEGEFSEAR,RNLDIERPTYT<br>EAWAR,NLDIERPTYTNLNR,AVFVD<br>NLNR,AYHEQLSVAEITNACFEP<br>LEPTVIDEVR,EDAANNYAR,LSVDY<br>GK,QLFHPEQLITGK,LIGQIVSSITAS<br>NQMVK,NLDIERPTYTNLNR,AVC<br>GK,QLFHPEQLITGK,LIGQIVSSITAS<br>MLSNTTAIAEAWAR,AVFVDLEPT<br>LR,VGINYQPPTVPPGGDLAK,FDLM<br>VIDEVR,EDAANNYAR,QLFHPEQ<br>YAK<br>LITGK,LSVDYGK,LIGQIVSSITASL<br>R,VGINYQPPTVPPGGDLAK,FDL<br>MYAK |

---

|               |        |        |                        |                                                                                                                                                      |                                                                                                                                                                                                                     |
|---------------|--------|--------|------------------------|------------------------------------------------------------------------------------------------------------------------------------------------------|---------------------------------------------------------------------------------------------------------------------------------------------------------------------------------------------------------------------|
|               |        |        |                        |                                                                                                                                                      | EIIDLVLDL,FDGALNVDLTEFQTN<br>LVPYPR,DVNAAIATIK,LADQCTG<br>LQGFLVFHSGGGTGSGFTSLLM                                                                                                                                    |
| IPI00117348.4 | P05213 | Tuba1b | Tubulin alpha-1B chain | EIIDLVLDL,IHFPLATYAPVISA EK,AFV<br>HWYVGEEMEEGEFSEAR,NLDIERPT<br>YTNLNR,AVFVDLEPTVIDEVR,QLFHP<br>EQLITGK,VGINYQPPTVPPGGDLAK,TI<br>GGGDDSFNTFFSETGAGK | ER,GHYTIGK,LISQIVSSITASLR,TI<br>GGGDDSFNTFFSETGAGK,IHFPL<br>ATYAPVISA EK,AFVHWYVGEEM<br>EEGEFSEAR,AYHEQLSVAEITNA<br>CFEPANQMVK,NLDIERPTYTNLNR<br>R,SIQFVDWCPTGFK,AVFVDLEP<br>TVIDEVR,LSVDYGK,VGINYQPPT<br>VPPGGDLAK |

---

|               |        |        |                        |                                                                                                                                                      |                                                                                                                                                                                                                                                                        |
|---------------|--------|--------|------------------------|------------------------------------------------------------------------------------------------------------------------------------------------------|------------------------------------------------------------------------------------------------------------------------------------------------------------------------------------------------------------------------------------------------------------------------|
|               |        |        |                        |                                                                                                                                                      | YMACCLLYR,DVNAAIATIK,EIIDL<br>VLDL,FDGALNVDLTEFQTNLVPY<br>PR,LSVDYGKK,TIQFVDWCPTGF<br>K,LADQCTGLQGFLVFHSGGGT<br>GSGFTSLLMER,LISQIVSSITASL                                                                                                                              |
| IPI00403810.2 | P68373 | Tuba1c | Tubulin alpha-1C chain | EIIDLVLDL,IHFPLATYAPVISA EK,AFV<br>HWYVGEEMEEGEFSEAR,NLDIERPT<br>YTNLNR,AVFVDLEPTVIDEVR,QLFHP<br>EQLITGK,VGINYQPPTVPPGGDLAK,TI<br>GGGDDSFNTFFSETGAGK | R,GHYTIGK,TIGGGDDSFNTFFSE<br>TGAGK,EDMAALEK,AYHEQLTVA<br>EITNACFEPANQMVK,AFVHWYV<br>GEGMEEGEFSEAR,IHFPLATYAP<br>VISA EK,RNLDIERPTYTNLNR,AV<br>CMLSNTTAIAEAWAR,NLDIERPT<br>YTNLNR,AVFVDLEPTVIDEVR,ED<br>AANNYAR,LSVDYGK,QLFHPEQL<br>ITGK,VGINYQPPTVPPGGDLAK,F<br>DLMYAK |

---



|               |        |        |                        |                                                                                                   |                                                                                                                                                                                                                                                                                                                                                                                                                                                                                                                                                                              |
|---------------|--------|--------|------------------------|---------------------------------------------------------------------------------------------------|------------------------------------------------------------------------------------------------------------------------------------------------------------------------------------------------------------------------------------------------------------------------------------------------------------------------------------------------------------------------------------------------------------------------------------------------------------------------------------------------------------------------------------------------------------------------------|
| IPI00117350.1 | P68368 | Tuba4a | Tubulin alpha-4A chain | AFVHWYVGEEMEEGEFSEAR,IHFPL<br>ATYAPVISA EK,NLDIERPTYTNLNR,QL<br>FHPEQLITGK,VGINYQPPTVVPGGDL<br>AK | YMACCLLYR,FDGALNVDLTEFQT<br>NLVPYPR,LSVDYGKK,LISQIVSSI<br>TASLR,GHYTIGK,EDMAALEK,IHF<br>FDGALNVDLTEFQTNLVPYPR,LISQ<br>PLATYAPVISA EK,AFVHWYVGEEM<br>IVSSITASLR,GHYTIGK,IHFPLATYA<br>MEEGEFSEAR,RNLDIERPTYTNL<br>PVISA EK,TIGGGDDSF TTF CETA<br>NR,AYHEQLSVAEITNACFEPANQ<br>GK,AVCMLSNTT AIAEAWAR,SIQFV<br>MVK,SIQFVDWCPTGFK,NLDIER<br>DWCPTGFK,NLDIERPTYTNLNR,ED<br>PTYTNLNR,AVCMLSNTT AIAEAW<br>AANNYAR,QLFHPEQLITGK,LSVDY<br>AR,EDAANNYAR,LSVDYGK,QLF<br>GK,VGINYQPPTVVPGGDLAK,FDL<br>HPEQLITGK,VGINYQPPTVVPGG<br>MYAK,AVFVDLEPTVIDEIR<br>DLAK,FDLMYAK,AVFVDLEPTVID<br>EIR |
|---------------|--------|--------|------------------------|---------------------------------------------------------------------------------------------------|------------------------------------------------------------------------------------------------------------------------------------------------------------------------------------------------------------------------------------------------------------------------------------------------------------------------------------------------------------------------------------------------------------------------------------------------------------------------------------------------------------------------------------------------------------------------------|

|               |        |        |                       |                                                                           |                                                                                                                                                                                                                                                                                                                                                                                                                                                                                                                                                                                                                                                               |
|---------------|--------|--------|-----------------------|---------------------------------------------------------------------------|---------------------------------------------------------------------------------------------------------------------------------------------------------------------------------------------------------------------------------------------------------------------------------------------------------------------------------------------------------------------------------------------------------------------------------------------------------------------------------------------------------------------------------------------------------------------------------------------------------------------------------------------------------------|
| IPI00109061.1 | Q9CWF2 | Tubb2b | Tubulin beta-2B chain | GHYTEGAELVDSVLDVVR,SGPFGQIF<br>RPDNFVFGQSGAGNNWAK,GHYTEG<br>AELVDSVLDVVRK | AILVDLEPGTMDSVR,PNNVKTAV<br>CDIPPR,NSSYFVEWIPNNVK,ALT<br>VPELTQQMFDSK,TAVCDIPPR,Y<br>AILVDLEPGTMDSVR,NSSYFVEWIP<br>LTVA AIFR,KLAVNMVPPFR,IREE<br>NNVK,ALT VPELTQQMFDSK,TAVC<br>YPDR,LHFFMPGFAPLTSR,MSAT<br>DIPPR,IREEYPDR,LHFFMPGFAPL<br>FIGNSTAIQELFK,INVYYNEATGN<br>SR,INVYYNEATGNK,GHYTEGAELV<br>K,ISEQFTAMFR,GHYTEGAELVD<br>DSVLDVVR,EVDEQMLNVQNK,EIV<br>SVLDVVR,EVDEQMLNVQNK,FP<br>HIQAGQCGNQIGAK,FPGQLNADLR<br>GQLNADLR,EIVHIQAGQCGNQIG<br>,NMMAACDPR,SGPFGQIFRPDNFV<br>AK,NMMAACDPR,SGPFGQIFRP<br>FGQSGAGNNWAK,LAVNMVPPFR,L<br>DNFVFGQSGAGNNWAK,LAVNM<br>TTPTYGDLNHLVSATMSGVTTC<br>VPPFR,LTTPY GDLNHLVSATMS<br>GVTTCCLR,FWEVISDEHGIDPTGS<br>YHGSDLQLER |
|---------------|--------|--------|-----------------------|---------------------------------------------------------------------------|---------------------------------------------------------------------------------------------------------------------------------------------------------------------------------------------------------------------------------------------------------------------------------------------------------------------------------------------------------------------------------------------------------------------------------------------------------------------------------------------------------------------------------------------------------------------------------------------------------------------------------------------------------------|

|               |        |        |                       |                                                                           |                                                                                                                                                                                                                                                                                                                                                                                                                                                                                                                                                                                                                                                                          |
|---------------|--------|--------|-----------------------|---------------------------------------------------------------------------|--------------------------------------------------------------------------------------------------------------------------------------------------------------------------------------------------------------------------------------------------------------------------------------------------------------------------------------------------------------------------------------------------------------------------------------------------------------------------------------------------------------------------------------------------------------------------------------------------------------------------------------------------------------------------|
| IPI00169463.1 | P68372 | Tubb2c | Tubulin beta-2C chain | GHYTEGAELVDSVLDVVR,SGPFGQIF<br>RPDNFVFGQSGAGNNWAK,GHYTEG<br>AELVDSVLDVVRK | FWEVISDEHGIDPTGTYHGSDSL<br>QLER,NSSYFVEWIPNNVK,TAVC<br>DIPPR,ALT VPELTQQMFDAK,KLA<br>VNMVPPFR,IREEYPDR,MSATFIG<br>NSSYFVEWIPNNVK,TAVCDIPPR,A<br>NSTAIQELFK,LHFFMPGFAPLTS<br>LTVPELTQQMFDAK,IREEYPDR,LH<br>R,ISEQFTAMFR,GHYTEGAELVD<br>FFMPGFAPLTSR,GHYTEGAELVDS<br>SVLDVVR,EVDEQMLNVQNK,INV<br>VLDVVR,EVDEQMLNVQNK,INVYY<br>YYNEATGGK,AVLVDLEPGTMDS<br>NEATGGK,FPGQLNADLR,NMMAAC<br>VR,FPGQLNADLR,NMMAACDPR,<br>DPR,YLTVA A VFR,SGPFGQIFRPDN<br>EAESCDCLQGFQLTHSLGGGTG<br>FVFGQSGAGNNWAK,LAVNMVPP<br>SGMGTLISK,YLTVA A VFR,SGPF<br>R,LTTPY GDLNHLVSATMSGVTTC<br>GQIFRPDNFVFGQSGAGNNWAK,<br>LR,IMNTFSVVPSPK<br>LAVNMVPPFR,LTTPY GDLNHLV<br>SATMSGVTTCCLR,IMNTFSVVPSP<br>K |
|---------------|--------|--------|-----------------------|---------------------------------------------------------------------------|--------------------------------------------------------------------------------------------------------------------------------------------------------------------------------------------------------------------------------------------------------------------------------------------------------------------------------------------------------------------------------------------------------------------------------------------------------------------------------------------------------------------------------------------------------------------------------------------------------------------------------------------------------------------------|

|               |        |       |                      |                                                                   |                                                                                                                                                                                                                                                                                                                                                                                 |                                                                                                                                                                                                                                                                                          |
|---------------|--------|-------|----------------------|-------------------------------------------------------------------|---------------------------------------------------------------------------------------------------------------------------------------------------------------------------------------------------------------------------------------------------------------------------------------------------------------------------------------------------------------------------------|------------------------------------------------------------------------------------------------------------------------------------------------------------------------------------------------------------------------------------------------------------------------------------------|
| IPI00112251.1 | Q9ERD7 | Tubb3 | Tubulin beta-3 chain | GHYTEGAELVDSVLDVVR,GHYTEGAELVDSVLDVVRK                            | AILVDLEPGTMDSVR,ISEQFTAMFR,NSSYFVEWIPNNVK,GHYTEGAELVDSVLDVVR,LATPTYGDLNHLVSATMSGVTTSLR,FPGQLNADLR,EIVHIQAGQCGNQIGAK,ALTVP ELTQQMFDAK,NMMAACDPR,LAVNMVPPFR,KLAVNMVPPFR,IMNTFSVPSPK                                                                                                                                                                                               | AILVDLEPGTMDSVR,GHYTEGAELVDSVLDVVR,NSSYFVEWIPNNVK,LATPTYGDLNHLVSATMSGVTTSLR,EIVHIQAGQCGNQIGAK,FPGQLNADLR,ALTVP ELTQQMFDAK,NMMAACDPR,LAVNMVPPFR,YLTVATVFR,IMNTFSVPSPK                                                                                                                     |
| IPI00109073.5 | Q9D6F9 | Tubb4 | Tubulin beta-4 chain | SGPFGQIFRPDNFVFGQSGAGNNWAK                                        | FWEVISDEHGIDPTGTYHGSDQLER,NSSYFVEWIPNNVK,MAATFIGNSTAIQELFK,TAVCDIPPR,ALTVP ELTQQMFDAK,KLAVNMVPPFR,LHFFMPGFAPLTSR,ISEQFTAMFR,AVLVDLEPGTMDSVR,FPGQLNADLR,YLTVAAVFR,NMMAACDPR,EAESCDCLQGFQLTHSLGGTGSGMGTLLISK,SGPFGQIFRPDNFVFGQSGAGNNWAK,LAVNMVPPFR,LTTPTYGDLNHLVSATMSGVTTCLR,IMNTFSVPSPK                                                                                          |                                                                                                                                                                                                                                                                                          |
| IPI00117352.1 | P99024 | Tubb5 | Tubulin beta-5 chain | GHYTEGAELVDSVLDVVR,SGPFGQIFRPDNFVFGQSGAGNNWAK,GHYTEGAELVDSVLDVVRK | AILVDLEPGTMDSVR,PNNVKTAVCDIPPR,NSSYFVEWIPNNVK,MAVTFIGNSTAIQELFK,ALTVP ELTQQMFDAK,TAVCDIPPR,FWEVISDEHGIDPTGTYHGSDQLQDLDR,KLAVNMVPPFR,IREEYPDR,LHFFMPGFAPLTSR,ISEQFTAMFR,GHYTEGAELVDSVLDVVR,ISVYYNEATGK,EVDEQMLNVQNK,FPGQLNADLR,EIVHIQAGQCGNQIGAK,NMMAACDPR,YLTVAAVFR,EAESCDCLQGFQLTHSLGGTGSGMGTLLISK,SGPFGQIFRPDNFVFGQSGAGNNWAK,LAVNMVPPFR,LTTPTYGDLNHLVSATMSGVTTCLR,IMNTFSVPSPK | AILVDLEPGTMDSVR,NSSYFVEWIPNNVK,ALTVP ELTQQMFDAK,FWEVISDEHGIDPTGTYHGSDQLQDLDR,TAVCDIPPR,IREEYPDR,LHFFMPGFAPLTSR,GHYTEGAELVDSVLDVVR,ISVYYNEATGGK,EVDEQMLNVQNK,FPGQLNADLR,EIVHIQAGQCGNQIGAK,YLTVAAVFR,NMMAACDPR,SGPFGQIFRPDNFVFGQSGAGNNWAK,LAVNMVPPFR,LTTPTYGDLNHLVSATMSGVTTCLR,IMNTFSVPSPK |
| IPI00122928.1 | Q922F4 | Tubb6 | Tubulin beta-6 chain | GHYTEGAELVDSVLDVVR,GHYTEGAELVDSVLDVVRK                            | NSSYFVEWIPNNVK,GHYTEGAELVDSVLDVVR,FPGQLNADLR,ALTVP ELTQQMFDAK,NMMAACDPR,LAVNMVPPFR,MASTFIGNSTAIQELFK,KLAVNMVPPFR,LTTPTYGDLNHLVSATMSGVTTSLR,IREEYPDR                                                                                                                                                                                                                             | NSSYFVEWIPNNVK,GHYTEGAELVDSVLDVVR,FPGQLNADLR,ALTVP ELTQQMFDAK,NMMAACDPR,LAVNMVPPFR,YLTVATVFR,LTTPTYGDLNHLVSATMSGVTTSLR,IREEYPDR,SGPFGQLFRPDNFIFGQTGAGNNWAK                                                                                                                               |

|               |        |         |                                                                         |                                                                                                                                        |                                                                      |                                                                                           |
|---------------|--------|---------|-------------------------------------------------------------------------|----------------------------------------------------------------------------------------------------------------------------------------|----------------------------------------------------------------------|-------------------------------------------------------------------------------------------|
| IPI00342749.3 | Q6PAM1 | Txlna   | Isoform 1 of Alpha-taxilin                                              | EVTSHFQVTLNDIQLQMEQHNER,ATD<br>APCCSGAPSTGTAGQTGPGEPTPATA<br>,EITLLMQTLNLTSTPEEK,VQDLTAGGI<br>TDIGSER,LIEQYELREEHIDKVKF                |                                                                      |                                                                                           |
| IPI00226993.5 | P10639 | Txn1    | Thioredoxin                                                             | EAFQEALAAAGDK,EKLEASITEYA                                                                                                              | EAFQEALAAAGDK,LVVVDFSAT<br>WCGPCK,VGEFSGANK                          | EAFQEALAAAGDK,PFFHSLCDK,V<br>GEFSGANK                                                     |
| IPI00133110.1 | Q9CQU0 | Txndc12 | Thioredoxin domain-containing protein<br>12                             | DEDFSPDGGYIPR,ILFLDPSGK,VRPEI<br>INESGNPSYK,YFYVSAEQVVQGMK,E<br>AAASGLPLMVIHK,FAESTEISELSHNF<br>VMVNLEDEEEPR                           |                                                                      |                                                                                           |
| IPI00471077.3 | Q9CQM5 | Txndc17 | Thioredoxin domain-containing protein<br>17                             | HVTEDCVFIYCQVGDQPYWK,TIFAYF<br>SGSK,SWCPDCVEAEPVIR                                                                                     |                                                                      |                                                                                           |
| IPI00163011.2 | Q91W90 | Txndc5  | Thioredoxin domain-containing protein 5                                 | ALAPTWEQLALGLEHSETVK,DLDSLH<br>SFVLR,QGLYELSANNFELHVSQGNHF<br>IK,GYPTLLWFR,GYPTLLLFR,SFEDTIA<br>QGITVK                                 |                                                                      |                                                                                           |
| IPI00654054.1 | Q3UNH3 | Txn1    | Putative uncharacterized protein<br>(Fragment)                          | IDQYQGADAVGLEEK,GYMDLMPFINK<br>,MVGVKPVGSDPDFQPELSGAGSR,IFI<br>NLPR                                                                    |                                                                      | AGCECLNESDEHGFDNCLR,IFINLP<br>R                                                           |
| IPI00133298.2 | Q3TBP4 | Txn1a   | Putative uncharacterized protein                                        | AALHLYSNTLNFQVSEVEPK,MEEDPD<br>DVPHGHITSLAVK,ENQGSTLPGSEEA<br>SQQENLAGGDSGSDGK                                                         |                                                                      |                                                                                           |
| IPI00776252.1 |        | Txnrd1  | Isoform 1 of Thioredoxin reductase 1,<br>cytoplasmic                    |                                                                                                                                        | VVGFHVLGPNAGEVTQGFAAALK<br>,FLIATGERPR,VLVLDFTPTPLG<br>TR            | VVGFHVLGPNAGEVTQGFAAALK,L<br>ELTPVAIQAGR,WGLGGTCVNVGCI<br>PK                              |
| IPI00130734.1 | P07607 | Tyms    | Thymidylate synthase                                                    | DFLDSLGF SAR,GVLEELLWFIK                                                                                                               |                                                                      |                                                                                           |
| IPI00113746.3 | P26369 | U2af2   | Splicing factor U2AF 65 kDa subunit                                     | NFAFLEFR,LFIGGLPNYLNDQVK,EL<br>LTSFGPLK,SVDETTQAMAFDGIIFQGG<br>SLK,LGGLTQAPGNPVLAVQINQDK,A<br>MQAAGQIPATALLPTMTPDGLAVTPTP<br>VPVVGSMTR | NFAFLEFR,LFIGGLPNYLNDQV<br>K,IFVEFTSVFDCQK,LGGLTQAPG<br>NPVLAVQINQDK | LFIGGLPNYLNDQVK,ELLTSFGPL<br>K,SIEIPRPVDGVEVPGCGK,LGGLT<br>QAPGNPVLAVQINQDK,YCDPDSYH<br>R |
| IPI00462482.3 | Q3TW96 | Uap111  | Isoform 1 of UDP-N-acetylhexosamine<br>pyrophosphorylase-like protein 1 | AALLAELASLEADALR,REFEPLLR                                                                                                              |                                                                      |                                                                                           |

|               |          |      |                                                  |                                                                                                                                                                                                                                                                                                            |                                                                                                                                                                                                                                                                                                                                                                                                                                                                                                 |                                                                                                                                                                                                                                                              |
|---------------|----------|------|--------------------------------------------------|------------------------------------------------------------------------------------------------------------------------------------------------------------------------------------------------------------------------------------------------------------------------------------------------------------|-------------------------------------------------------------------------------------------------------------------------------------------------------------------------------------------------------------------------------------------------------------------------------------------------------------------------------------------------------------------------------------------------------------------------------------------------------------------------------------------------|--------------------------------------------------------------------------------------------------------------------------------------------------------------------------------------------------------------------------------------------------------------|
| IPI00123313.1 | Q02053   | Uba1 | Ubiquitin-like modifier-activating enzyme 1      |                                                                                                                                                                                                                                                                                                            | IIPAIATTTAAVVGLVCLELYK,KPL<br>LESGTLGTK,AVTLHDQGTTQWA<br>DLSSQFYLR,NEEDATELVGLAQA<br>VNAR,LAGTQPLEVLEAVQR,VGE<br>FCHSR,ALVLELCCNDESGEDVE<br>VPYVR,NGFLNLALPFFGFSEPLA<br>APR,LAYVAAGDLAPINAFIIGGLAA<br>QEVMK,AENYDISPADR,AAVASL<br>LQSVQVPEFTPK,IYDDDFQNLN<br>GVANALDNIDAR,IHVSDQELQSA<br>NASVDDSR,VVQGHQQLDSYK,N<br>FPNAIEHTLQWAR,IHVSDQELQS<br>ANASVDDSRLEELK,NIILGGVK,L<br>KSDTAAAVR,YDGQVAVFGSDF<br>QEK,GLGVEIAK,YFLVGAGAIGCE<br>LLK,MLQTSSVLVSGLR,MYPIDFE<br>KDDSNFHMDFIVAASNL,GGIV<br>SQVK | KPLLESGTLGTK,IIPAIATTTAAVVG<br>LVCLELYK,SLPASLVEPDFVMTDFN<br>K,LAGTQPLEVLEAVQR,VGEFCHS<br>R,NGFLNLALPFFGFSEPLAAPR,AA<br>VASLLQSVQVPEFTPK,YSRPAQLHI<br>GFQALHQFCALHNQPPRPR,PAQL<br>HIGFQALHQFCALHNQPPRPR,VVQ<br>GHQQLDSYK,MLQTSSVLVSGLR,G<br>GIVSQVK,RVSGPDPK |
| IPI00130173.1 | Q9Z1F9   | Uba2 | SUMO-activating enzyme subunit 2                 | GTILISSEEGETEANNPK,QFILVMNAL<br>DNR,DDPPAMDFVTSANLR,DVEFEV<br>VGDSPEK,FAMVAPDVQIEDGK,ADPE<br>AAWEPTAEAR                                                                                                                                                                                                    | GTILISSEEGETEANNPK,VLVVG<br>GGIGCELLK,LQADDFLQDYTLIN<br>ILHSEDLGK,VTVLTLQDK,ELAEA<br>VSGGR,QFILVMNALDNR,SMAGN<br>IIPAIATTTNAVIAGLIVLEGLK,NLVL<br>TGFSHIDLIDLDTIDVSNLNR,KLE<br>ENEAASTKK                                                                                                                                                                                                                                                                                                         | KPPVPLDWAEVQSQGEANADQQN<br>EPQLGLK,VLVVGAGGIGCELLK,LQ<br>ADDFLQDYTLINILHSEDLGK,MCL<br>AADVPLIESGTAGYLGQVTTIKK,SM<br>AGNIIPAIATTTNAVIAGLIVLEGLK,MC<br>LAADVPLIESGTAGYLGQVTTIK                                                                                 |
| IPI00457533.2 | Q91VX2   | Uba2 | Ubiquitin-associated protein 2                   | AINILLEGNSDTSWETVGGK,VFTASS<br>APAENHVTPGHSIDLVALLHK,LAQVIF<br>DKNDSDFEAK,LLQLPNMTVENIVSAH<br>QPQPK,NSVEEWTTEDWTEDLSETK,L<br>PMDYYGIPFAAPTALASR,GVSVSSGT<br>GLPDMTGSVYNK,DGNLANNPYSGDV<br>TK,LAVWEAAQNGTDEGPEGLAK                                                                                          |                                                                                                                                                                                                                                                                                                                                                                                                                                                                                                 |                                                                                                                                                                                                                                                              |
| IPI00761172.1 | Q80X50-2 | Uba2 | Isoform 2 of Ubiquitin-associated protein 2-like | IFTASNVSSVPLPAENVTITAGQR,AIN<br>VLLEGNDPETHSWEMVGK,DGSLASNP<br>YSGDLTK,NQDECVIALHDCNGDVNR,I<br>DLAVLLGK,LDFIGVEGSNYPR,TATEE<br>WGTEDWNEDLSETK,TPSSMENDSSN<br>LDPSQAPSLAQPLVFSNSK,GGSTTGS<br>QFLEQFK,FPLDYYSIPFPTPTTPTGR,<br>LAQMISDHNDADFEK,NGFSSVQAT<br>QLQTTQSVGATGSAVK,QHGVNVS<br>NASATPFQPSGYGSHGYNTGR | IFTASNVSSVPLPAENVTITAGQR,Q<br>RPQATAEQIR,FPLDYYSIPFPTPTT<br>PLTGR                                                                                                                                                                                                                                                                                                                                                                                                                               |                                                                                                                                                                                                                                                              |

|               |          |        |                                                        |                                                                                                                                                                                                                                                                                                  |                                                                                                                                                                                                                                                                                                                       |                                                                                                        |
|---------------|----------|--------|--------------------------------------------------------|--------------------------------------------------------------------------------------------------------------------------------------------------------------------------------------------------------------------------------------------------------------------------------------------------|-----------------------------------------------------------------------------------------------------------------------------------------------------------------------------------------------------------------------------------------------------------------------------------------------------------------------|--------------------------------------------------------------------------------------------------------|
| IPI00889927.1 | Q8BJ53   | Ubp2l  | Putative uncharacterized protein                       | IFTASNVSSVPLPAENVITAGQR,AID<br>VLLEGNPDTHSWEMVGK,GGSTTGSQ<br>FLEQFK,FPLDYYSIPFPTPTTPTLGR,D<br>GSLASNPYSGDLTK,LAQMISDHNDAD<br>FEEK,NGFSSVQATQLQTTQSVEGAT<br>GSAVK,NQDECVIALHDCNGDVNR,IDL<br>AVLLGK,TATEEWGTEDWNE DLSETK,<br>QHGVNVSVNASATPFQQPSGYGSHG<br>YNTGR,TPSSMENDSSNLDPSQAPSL<br>AQPLVFSNSK | IFTASNVSSVPLPAENVITAGQR,<br>IDLAVLLGK                                                                                                                                                                                                                                                                                 | IFTASNVSSVPLPAENVITAGQR,Q<br>RPQATAEQIR,FPLDYYSIPFPTPTT<br>PLTGR                                       |
| IPI00133581.1 | Q9D1C1   | Ube2c  | Ubiquitin-conjugating enzyme E2 C                      |                                                                                                                                                                                                                                                                                                  |                                                                                                                                                                                                                                                                                                                       | ICLDILK,LSLEFSPGYPNAPTvk                                                                               |
| IPI00322440.5 | P61087   | Ube2k  | Ubiquitin-conjugating enzyme E2 K                      |                                                                                                                                                                                                                                                                                                  | LWAHVYAGAPVSSPEYTK,NAVIV<br>ALSSK,YQLEIK,IPETYFNPFPK,T<br>VLLSLQALLAAEPDDPQDAVVA<br>NQYK,VDLVDENFTELR                                                                                                                                                                                                                 |                                                                                                        |
| IPI00453803.5 | Q6ZPJ3   | Ube2o  | Ubiquitin-conjugating enzyme E2 O                      |                                                                                                                                                                                                                                                                                                  | VVVEEVQVVELK,LRPSGDDVELI<br>GEEEDVSVYDIADHPDFR,GEVFS<br>VLEFAPSNHSFK                                                                                                                                                                                                                                                  |                                                                                                        |
| IPI00113257.3 | Q9CZY3   | Ube2v1 | Isoform 1 of Ubiquitin-conjugating enzyme E2 variant 1 | WTGMIIGPPR,LLEELEEGQK,VNMSG<br>VSSNGVVDPR,GVGDGTVSWGLED<br>DEDMTLTR                                                                                                                                                                                                                              | VILQELR,LLEELEEGQK,YPEAPP<br>SVR                                                                                                                                                                                                                                                                                      |                                                                                                        |
| IPI00311591.3 | Q3UE37   | Ube2z  | Ubiquitin-conjugating enzyme E2 Z                      |                                                                                                                                                                                                                                                                                                  |                                                                                                                                                                                                                                                                                                                       | EPPPGMFVVPDVTDMTK,LMTTGN<br>NTVR                                                                       |
| IPI00131915.2 | Q78JW9   | Ubfd1  | Ubiquitin domain-containing protein UBF1               | LPTVPLSGMYNK,IMVVGSTINDVLAVN<br>TPK,GNLQPAPAQPPGDPAQASVSN<br>GEDAGGGVGK,LEQDQLWIGTK                                                                                                                                                                                                              |                                                                                                                                                                                                                                                                                                                       |                                                                                                        |
| IPI00387416.1 | Q9QZM0   | UbqIn2 | Ubiquilin-2                                            | EANLQALIATGGDINAAIER,LIFAGK,N<br>QDLALSNLESIPGGYNALR                                                                                                                                                                                                                                             |                                                                                                                                                                                                                                                                                                                       |                                                                                                        |
| IPI00648087.1 | Q6WKZ8-2 | Ubr2   | Isoform 2 of E3 ubiquitin-protein ligase UBR2          |                                                                                                                                                                                                                                                                                                  |                                                                                                                                                                                                                                                                                                                       | ALSWLGSVIGYSDGLR,FPELLPLSE<br>LSPMLIEHPLR,CLAVLTQCHGGFT<br>DGEQPITLSICGHSVETIR,QFVTCIL<br>CQEEQEVTVGSR |
| IPI00648709.2 | A2AN08-5 | Ubr4   | Isoform 5 of E3 ubiquitin-protein ligase UBR4          |                                                                                                                                                                                                                                                                                                  | ALATNPALR,GHQFGVLSVILAN<br>HAIK,SVFIAQNVASLQELGGSEK,<br>NLLPATLQLIDTYASFTR,AAQFVD<br>LLGYFSLK,VLIEFLLR,ITVLQLSA<br>LLK,ACAEIAAQR,LLEEQGIFLR,A<br>VSNINTLLDK,STLEVLQLFPINIK,L<br>IDSVPLTNLLL TLLSTSYR,AQQAL<br>SELHTVDK,CSASVPANPGVCGN<br>CGENVYQCHK,TVQAIVELK,DLH<br>TLDShVR,YDVEIVEEYFAR,TLLP<br>LLESSTESAAEISSNSLER | KCLPIR,ACAEIAAQR                                                                                       |

|               |        |         |                                                   |                                                                                                                                                                       |                                                                                                 |                                                                                                                  |
|---------------|--------|---------|---------------------------------------------------|-----------------------------------------------------------------------------------------------------------------------------------------------------------------------|-------------------------------------------------------------------------------------------------|------------------------------------------------------------------------------------------------------------------|
| IPI00882371.1 |        | Ubr5    | 309 kDa protein                                   |                                                                                                                                                                       |                                                                                                 | LPNLDCIQNANK,LSAVEAIANAISVV<br>SSNGPGNR,GSGLLGSQPQPVIPAS<br>VIPEELISQAQVVLQGGK                                   |
| IPI00225151.1 | Q8BU04 | Ubr7    | Putative E3 ubiquitin-protein ligase UBR7         | EDIQQFFEEFQSK,REDIQQFFEEFQSK,DAATYWPLNWR                                                                                                                              |                                                                                                 |                                                                                                                  |
| IPI00123589.1 | Q922Y1 | Ubxn1   | UBX domain-containing protein 1                   | RAFSEADMERPLQELGLVPSAVLIVAK,SSPPATDGPVPSPPSQEPPTK,AFSEADMERPLQELGLVPSAVLIVAK,EPTPSEQVGPEGSGSAAGESRPILTEEER,LPDGTSLTQTFR,GEEPGQDQDPVQLSGFPR,LYVELHRGEEPGQDQDPVQLLSGFPR |                                                                                                 | LPDGTSLTQTFR,GEEPGQDQDPV<br>QLLSGFPR                                                                             |
| IPI00653686.1 | Q3TCH2 | Uch1    | Putative uncharacterized protein (Fragment)       |                                                                                                                                                                       | NEAIQAAHDSVAQEGQCR,VNFH<br>FILFNNVDGHL YELDGR,FADVLG<br>LEEETLGSVPSPACALLLFLPLTA<br>QHENFR      | NEAIQAAHDSVAQEGQCR,MFPFV<br>NHGASSEDSSLQDAAK                                                                     |
| IPI00311369.1 | Q9JKB1 | Uch3    | Ubiquitin carboxyl-terminal hydrolase isozyme L3  | FLENYDAIR,WLPLEANPEVTNQFLK,Q<br>LGLHPNWQFVDVYGMPELLSMVPR                                                                                                              | PVCAVLLFPITEK,VTHETSAHEG<br>QTEAPSIDEK                                                          | KPFPINHGK,QTISNACGTIGLIHAIA<br>NNKDK,QTISNACGTIGLIHAIANNK,<br>WLPLEANPEVTNQFLK                                   |
| IPI00129471.3 | A2AN37 | Uck1    | uridine-cytidine kinase 1                         |                                                                                                                                                                       |                                                                                                 | YADVIIIPR,DLEQILTQYAFVKPAFE<br>EFCLPTKK                                                                          |
| IPI00121203.1 | Q99PM9 | Uck2    | Uridine-cytidine kinase 2                         |                                                                                                                                                                       |                                                                                                 | KEETVTIYPADVVLFEGLAFYSQEV<br>R,YADVIIIPR,GADNLVAINLIVQHIQD<br>ILNGGLSK                                           |
| IPI00880407.1 |        | Ufm1    | Protein                                           |                                                                                                                                                                       |                                                                                                 | VPAATSAITNDGIGINPAQTAGNVF<br>LK,VLSVPESTPFTAVLK                                                                  |
| IPI00762897.2 | Q6P5E4 | Uggt1   | UDP-glucose:glycoprotein glucosyltransferase 1    |                                                                                                                                                                       | VWQLQDLSFQTAAR,IIGPLEDNE<br>LFNQDDFHLLNIILK,FLFVDADQI<br>VR,ILFLDVLFPPLVVDK,LAPLLLV<br>LQLINMNL |                                                                                                                  |
| IPI00417180.3 |        | Ugt1a10 | UDP glycosyltransferase 1 family, polypeptide A10 |                                                                                                                                                                       |                                                                                                 | PVMPNMVFGGMNCLQGKPLSK,K<br>AMEIAEALGR,MVPAAFPTSLPLCV<br>CLLLASGLVQAGR,TDFVLEFPRPV<br>MPNMVFGGMNCLQGK             |
| IPI00130200.6 | Q8VDF2 | Uhrf1   | E3 ubiquitin-protein ligase UHRF1                 |                                                                                                                                                                       | LWDDVLTSLQDGPYQIFLSK,VNQ<br>PLQTILNQLFPGYGSGR                                                   |                                                                                                                  |
| IPI00121552.2 | P13439 | Umps    | Uridine 5'-monophosphate synthase                 |                                                                                                                                                                       | NAGISFDSVCGVPYALPLATVIC<br>SANHIPMLIR,GLQEVGLPLHR,VT<br>DAIVLLDR                                | NAGISFDSVCGVPYALPLATVICSA<br>NHIPMLIR,IASWADIVNAHVVPVGS<br>GVVK,SGLSSPVYIDLR,GLQEVGLPL<br>HR,LHAVCTLSQMLEILQQQEK |
| IPI00420949.3 | Q9EPU0 | Upf1    | Isoform 1 of Regulator of nonsense transcripts 1  | FTAQGLPDLNHSQVYAVK,SQIDVALS<br>QDSTYQGER,ALVEGPLNNLR                                                                                                                  | LLGHEVEDVVIK,IPSEQEQLR,NV<br>FLLGFIPAK                                                          | RIAFFTLPK,TVLQRPLSLIQGPPGT<br>GK,LMQGDEICLR,ALVEGPLNNLR,I<br>PSEQEQLR,GNTSGSHIVNHLVR                             |

|               |          |         |                                                              |                                                                                                                           |                                                                                                                                                                                               |                                                                                                                                       |
|---------------|----------|---------|--------------------------------------------------------------|---------------------------------------------------------------------------------------------------------------------------|-----------------------------------------------------------------------------------------------------------------------------------------------------------------------------------------------|---------------------------------------------------------------------------------------------------------------------------------------|
| IPI00323353.3 | P52624   | Upp1    | Uridine phosphorylase 1                                      | AGPVLSVSHGMGIPSIGIMLHELK,LQ<br>GDQINTPHDVLVEYQQR                                                                          | LVGHFIK,LQGDQINTPHDVLVEY<br>QQRPQR,AGPVLSVSHGMGIPSI<br>GIMLHELK,YVAAELGLDHPGK,E<br>DVLYHFNLSTSTHDFPAMFGDVK<br>,FVCVGGSSSR,LDGALCSYTEK,I<br>GTSGGIGLEPGSVVITQQAVNEC<br>FKPEFEQIVLGK,AAVVCVTLDR | LVGHFIK,LQGDQINTPHDVLVEYQQ<br>RPQR,AGPVLSVSHGMGIPSIGIMLH<br>ELIK,YVAAELGLDHPGK,IGTSGGIG<br>LEPGSVITQQAVNECFKPEFEQIV<br>LGK,FVCVGGSSSR |
| IPI00653598.2 | Q3TV75   | Uqcrc1  | ubiquinol-cytochrome c reductase core<br>protein 1 precursor |                                                                                                                           | VVELLADIVQNSSLEDSQIEK,LCT<br>SATESEVTR,MVLAAGGVEHQQ<br>LLDLAQK                                                                                                                                |                                                                                                                                       |
| IPI00119138.1 | Q9DB77   | Uqcrc2  | Cytochrome b-c1 complex subunit 2,<br>mitochondrial          |                                                                                                                           | LPNGLVIASLENYAPLSR,AVAFQ<br>NSQTR,AVAQGNLSSADVQAAK,<br>MALVGLGVSHSVLK,YEDSNLNG<br>TSHLLR                                                                                                      | TSAAPGGVPLQPQDLEFTK,SMAAS<br>GNLGHTPFLDEL                                                                                             |
| IPI00133240.1 | Q9CR68   | Uqcrfs1 | Cytochrome b-c1 complex subunit<br>Rieske, mitochondrial     |                                                                                                                           | GVAGALRPLLQGAVPAASEPPVL<br>DVK,SGPFAPVLSATSR,VPDFSD<br>YR,EIDQEAHAVEVSQRL,PLVATV<br>GLNVPASVR,ESLSGQAAAR                                                                                      | GVAGALRPLLQGAVPAASEPPVLD<br>VK,PLVATVGLNVPASVR,ESLSGQA<br>AAR                                                                         |
| IPI00668766.3 |          | Urb1    | hypothetical protein LOC207932                               |                                                                                                                           | AESDLFLDMESVASLELATDK,SV<br>GPALLQSLGLLK,ISMECAEIFQL<br>LSGEK,DVILLHKK,TIEELLAILK,<br>GLGALLPTLAEHELDTVFLQTLQK                                                                                |                                                                                                                                       |
| IPI00128071.7 | Q9Z1Z0   | Uso1    | Isoform 1 of General vesicular transport<br>factor p115      |                                                                                                                           | SVPVEGESEHVSAAK,VLVSPTN<br>PPGATSSCQK                                                                                                                                                         |                                                                                                                                       |
| IPI00420601.5 | P52479   | Usp10   | Ubiquitin carboxyl-terminal hydrolase 10                     | LPPVLVLHLK,DIRPGAAFEPTYIYR,EG<br>LVPVSEDPVAIK,NIDYPVDLEISR,TVQ<br>DALESLVAR,TAGTQPYVGTDTTENFA<br>VANGK,QADFVQTPITGIFGGHIR | LPPVLVLHLK,VINQYQVVKPPAD<br>R,EGLVPVSEDPVAIK,TVQDALES<br>LVAR,IAELLETVTLIHKPVSLQPR                                                                                                            | TVQDALESLVAR,TAGTQPYVGTDT<br>TENFAVANGK,PGAAFEPTYIYR                                                                                  |
| IPI00154012.1 | Q8R5H1   | Usp15   | Isoform 1 of Ubiquitin carboxyl-terminal<br>hydrolase 15     |                                                                                                                           |                                                                                                                                                                                               | IGNILDCTALSALSGVPADK,MSTE<br>TEETDGHLR,YMSNTFEPLNKPDSIT<br>QDAGLYQQQVLVIEQK                                                           |
| IPI00420483.4 | Q3UJD6   | Usp19   | Isoform 1 of Ubiquitin carboxyl-terminal<br>hydrolase 19     |                                                                                                                           |                                                                                                                                                                                               | VSITFDPFLYLPVPLPQK,RAVHLRR                                                                                                            |
| IPI00668474.3 | Q6ZQ93-1 | Usp34   | Isoform 1 of Ubiquitin carboxyl-terminal<br>hydrolase 34     |                                                                                                                           | DIFNLLFLLPSLK,FVAAGGLQQLL<br>EIFNSAILEPK                                                                                                                                                      |                                                                                                                                       |
| IPI00457815.3 | Q3TIX9   | Usp39   | U4/U6.U5 tri-snRNP-associated protein<br>2                   |                                                                                                                           |                                                                                                                                                                                               | REAEPAAAR,ANDYANAVLQALS<br>NVP<br>PLR,EVPAPALPVVR,EQLIIPQVPLF<br>NILAK                                                                |
| IPI00884486.2 | Q8BTL9   | Usp4    | ubiquitin specific protease 4                                | GEIAEAYAELIK,NDSVIVDTFHGLFK                                                                                               |                                                                                                                                                                                               | VSVTFDPFCYLTLPPLK,TELGALM<br>GTTLQR,VSVTFDPFCYLTLPPLK                                                                                 |

|               |          |        |                                                                     |                                                                                                                                                                                                                                                                                                                                                                                                                                                                                                           |                                                                                             |
|---------------|----------|--------|---------------------------------------------------------------------|-----------------------------------------------------------------------------------------------------------------------------------------------------------------------------------------------------------------------------------------------------------------------------------------------------------------------------------------------------------------------------------------------------------------------------------------------------------------------------------------------------------|---------------------------------------------------------------------------------------------|
| IPI00463367.2 | Q6A4J8-2 | Usp7   | Isoform 2 of Ubiquitin carboxyl-terminal hydrolase 7                | EVFGTFGIPFLLR,VFYELQHS DK<br>PVGTK,LLEIVSYK,VLLDNVENK,A<br>GFIQDTSLILYEEVKPNLTER                                                                                                                                                                                                                                                                                                                                                                                                                          | LSEVLQAVTDHDIPQQLVER,QEAH<br>LYMQVQIVAEDQFCGHQGNMYD<br>EEK,FEFPEQLPLDEFLQK                  |
| IPI00798468.1 | A2AD18   | Usp9x  | Ubiquitin carboxyl-terminal hydrolase                               | LIGQLNLK,YISFLWQVADLGSSLN<br>MPPLR,GWLVDLLNK,LYSVVSQLI<br>R,EIYTNLGPR,YFLPIIEMVPQFLE<br>NLTDEELKK,LLQISSFNGK,LAQQ<br>ISDEASR,LQVNQVVIHEDFIQSCF<br>DR,LAWDFSPEQLDHLFDCFK,EQ<br>HDALEFFNSLVDSLDEALK,TGET<br>GVEETILEGHLGVTK,VPGQEETV<br>K,FWFAHNVLFNVS NR,YSHVQEV<br>QER,IELFVGGELIDPGDDRK,HLQ<br>VIFGHLAASR,DSLHQPQYVEK,LL<br>LTAIGYGHVR,VVIQSNDDIACR,V<br>LGGSFADQK,GSASDWYDALCILL<br>R,ILTDEAVSGWK,LVELCVAK,GE<br>LEVLEAAIDLSK,RTGETGVEETI<br>LEGHLGVTK,LVGVLVHSGQASG<br>GHYYSYIIQR,FIEELR,LWGEPVN<br>LR | WVVPVLPK,MNALNEVNK,VPGQEE<br>TVK,YSHVQEVQER,FLFTTGFTK,<br>LAQQISDEASR,SGGLPLVLSMLTR         |
| IPI00454162.3 | Q6J1H4   | Utf1   | Isoform 1 of Undifferentiated embryonic cell transcription factor 1 | SSLSALAPAPAPVEQEAEPLAA<br>ENDEPAPALR,APVSPDSAQR,AS<br>SPQVAPQSLNTALLQTLTHLGDIS<br>TVLGPLR,DQLSTLNQHVEHLR,E<br>TELLLGTLQAMWR,GSFDQTV<br>SLAVGFILGSAASER,RVSAALAR                                                                                                                                                                                                                                                                                                                                           | APVSPDSAQR,SSLSALAPAPAPVE<br>QEAEPLAAENDEPAPALR,RTPAQ<br>CR                                 |
| IPI00462762.2 | Q640M1   | Utp14a | Isoform 1 of U3 small nucleolar RNA-associated protein 14 homolog A | TIQNPIGSTWNTQR,EPSSFAPMEHVF<br>R,TLEEELEELGKEDSLPNK,KEQMISLQ<br>NLLTTR,LLEAIGSLSGK,EQMISLQNLL<br>TTR,DSTSQEVLSER,VDPDAALEELE<br>K,LALS DLLGPLKPSSSLA AVK,TLEELE<br>ELGK,TPSVTSLALPTTVEELEDEGAR,<br>EAEQLVFPLEK,TPLEQEVFNLLHK,KV<br>DPDAALEELEK                                                                                                                                                                                                                                                            |                                                                                             |
| IPI00226889.1 | Q8C7V3   | Utp15  | U3 small nucleolar RNA-associated protein 15 homolog                | NSDSPVPEHVPAELPEEK,FIVLQELVE<br>K                                                                                                                                                                                                                                                                                                                                                                                                                                                                         |                                                                                             |
| IPI00353579.1 | Q5SSI6   | Utp18  | U3 small nucleolar RNA-associated protein 18 homolog                | VLYVYDMLAGK,TGNFISTSTSLPR                                                                                                                                                                                                                                                                                                                                                                                                                                                                                 | LVHLPSCTVFSNFPVFK,AIMNLVTG<br>VTSLAFNPTEILAVASR,QFEVSPD<br>GSFLLISGIAGFSHLLSMK,AGATPG<br>RK |



|               |        |      |                                                          |                                                                               |                                                                                                                                                                                                                                                                              |                                                                                                                                                               |
|---------------|--------|------|----------------------------------------------------------|-------------------------------------------------------------------------------|------------------------------------------------------------------------------------------------------------------------------------------------------------------------------------------------------------------------------------------------------------------------------|---------------------------------------------------------------------------------------------------------------------------------------------------------------|
| IPI00850851.1 | Utp20  |      | down-regulated in metastasis                             |                                                                               | LGPVTETETQLPWILVGETLK,FL<br>DESLGEQVVK,NSLAYQPLLDLVV<br>QLAR,TLLDVVSALLLAENVSLPET<br>LIK,FLGAVAVDLGVDR,RMASMAI<br>K,LLETYLIVVK,LAALNVTEK,VLYL<br>LELESGNK,FLAGTQPEEIQFLDL<br>LSEPVK,TIQTIQGAITGDILPR,HE<br>NITIAATEVIGAICR,IIEDLGVHFLQ<br>YVLK,NLSQEIIELLK                   | SSVVIYK,EALGAPEAAASEGTVAK<br>.LQVGDLDLSCHEIMTEIFNHELFGAL<br>AEEK,LGNVNIDIIHR,ELQTTLVV,VK<br>PYLPLIAPLFR,LLFGFLTLMR                                            |
| IPI00119776.1 | Q9J113 | Utp3 | Isoform 1 of Something about silencing protein 10        |                                                                               |                                                                                                                                                                                                                                                                              | VPAHGHPVIER,YNLYLNYCANISFY<br>LILK,RVPAHGHPVIER                                                                                                               |
| IPI00461832.2 | Q8VCY6 | Utp6 | U3 small nucleolar RNA-associated protein 6 homolog      | IPELEQLER,ELEIESQPGEEQPVSK,P<br>FSVEFFR,AIIAVTGASSVTLKEK,AAMD<br>MGDFDHPEEILK |                                                                                                                                                                                                                                                                              |                                                                                                                                                               |
| IPI00125267.4 | Q9WV55 | Vapa | Vesicle-associated membrane protein-associated protein A |                                                                               |                                                                                                                                                                                                                                                                              | PHSVSLNDTETR,GPFTDVVTTNLK,<br>VAHSDKPGSTSAVSFR,KVAHSDK                                                                                                        |
| IPI00130353.5 | Q9Z1Q9 | Vars | Valyl-tRNA synthetase                                    |                                                                               | LPALQGGPGLWVWGAPAVAQL<br>LWPAGLGGPGGSR,SLGNVIDPL<br>DVIHGVSLQGLYDQLLNSNLDPS<br>EVEK,LLSPFMPFVTEELFQR,LSA<br>TVTEAFVR,AVLGEVALYSGAR,L<br>HTYLAGDAPTLADLAAVTALLLPF<br>R,VPLEVQEAEAK,ALNPLEDWL<br>R,ITPAHDQNDYEVGQR,GPGQD<br>PQAALGALGK,GFVPSATSKPEG<br>HESLVDR,SVTQQPGSEVIAPQK | LPALQGGPGLWVWGAPAVAQLL<br>WPAGLGGPGGSR,SLGNVIDPLDVI<br>HGVSLQGLYDQLLNSNLDPEVEK,<br>LHTYLAGDAPTLADLAAVTALLPFR<br>,LHEEGVIYR,GPGQDPQAALGALG<br>K,GALINVPPPFGLPR |
| IPI00624876.3 | P70460 | Vasp | Vasodilator-stimulated phosphoprotein                    |                                                                               |                                                                                                                                                                                                                                                                              | LPAQSEPVR,QEEASGGPLAPK                                                                                                                                        |
| IPI00121851.2 | P61759 | Vbp1 | Prefoldin subunit 3                                      | NLDSLEEDLDFLR,LHLGIPEAVFVEDV<br>DSFMK                                         |                                                                                                                                                                                                                                                                              |                                                                                                                                                               |
| IPI00405227.3 | Q64727 | Vcl  | Vinculin                                                 |                                                                               |                                                                                                                                                                                                                                                                              | AIPDLTAPVAAVQAAVSNLVR,QILD<br>EAGK,VDQLTAQLADLAAR,GNDIIA<br>AAK                                                                                               |

|               |        |        |                                                                         |                                                                                                                                                                                                                                                                                                                                                                                                                   |                                                                                                                                                                                                                                                                                                                                                                                                                                                                                                                                                                                                                                                                                                                                  |
|---------------|--------|--------|-------------------------------------------------------------------------|-------------------------------------------------------------------------------------------------------------------------------------------------------------------------------------------------------------------------------------------------------------------------------------------------------------------------------------------------------------------------------------------------------------------|----------------------------------------------------------------------------------------------------------------------------------------------------------------------------------------------------------------------------------------------------------------------------------------------------------------------------------------------------------------------------------------------------------------------------------------------------------------------------------------------------------------------------------------------------------------------------------------------------------------------------------------------------------------------------------------------------------------------------------|
| IPI00622235.5 | Q01853 | Vcp    | Transitional endoplasmic reticulum ATPase                               | <p>YEMFAQTLQQSR,WALSQSNPSALR, QTNPSAMEVEEDDPVPEIR,LDQLIYIP LPDEK,IVSQLLTLMGDLK,NAPAIIFIDE LDAIAPK,EVDIGIPDATGR,EAVCIVLS DDTCSDEK,DVDLEFLAK,VLFFDELDS IAK,GDDLSTAILK,VINQILTEMDGMST K,KYEMFAQTLQQSR,MTNGFSGADLT EICQRACK,MDELQLFR,ELQELVQYPV EHPDK,LIVDEAINEDNSVVSLSQPK</p>                                                                                                                                        | <p>ETVVEVPQVTWEDIGGLEDVKR,L ADDVDLEQVANETHGHVGADLA WALSQSNPSALR,LADDVDLEQVAN ETHGHVGADLAALCSEAALQAIR,L ALCSEAALQAIR,LDQLIYIPLPDEK DQLIYIPLPDEK,VVETDPSPYCIVAP ,AIANECQANFISIK,NAPAIIFIDEL DTVIHCEGEPIK,IVSQLLTLMGDLK, DAIAPK,EVDIGIPDATGR,EAVCIV NAPAIIFIDELDAIAPK,SVSDNDR,E LSDDTCSDEK,LAGESESNLRK,D VDIGIPDATGR,QAAPCVLFFDELDS VDLEFLAK,RSVSDNDRK,GDDL IAK,GGNIGDGGGAADR,VLFFDEL IAK,GDDLSTAILK,VINQILTEMDG TAILK,AHVIVMAATNRPNSIDPAL SIAK,GDDLSTAILK,VINQILTEMDG R,NVFIIGATNRPDIIDPAILRPGR,I MSTK,ETVVEVPQVTWEDIGGLEDV HVLPIDDTVEGITGNLFEVYLKPY K,GVLFYGGPPGCGK,LGDVISIQPCP FLEAYRPIR,LGDVISIQPCPDVK,L DVK,GILLYGPPGTGK,ELQELVQYP IVDEAINEDNSVVSLSQPK,LAGE VEHPDK,LIVDEAINEDNSVVSLSQP SESNLR,ELQELVQYPVEHPDK K,LAGESESNLR</p> |
| IPI00122549.1 | Q60932 | Vdac1  | Isoform PI-VDAC1 of Voltage-dependent anion-selective channel protein 1 | <p>KLETAVNLAWTAGNSNTR,GALV LGYEGWLAGYQMNFETSK,VNNS VNNSSLIGLGYTQTLKPGIK,SENGL SLIGLGYTQTLKPGIK,TDEFQLHT EFTSSGSANTETTK,WNTDNTLGTE NVNDGTEFGGSIYQK,LGLGLEFQ ITVEDQLAR,YQVDPDACFSAK,LTF A,YQVDPDACFSAK,LTFDSSFSP DSSFSPNTGK,GYGFGLIK,VTQSNF NTGK,EHINLGCDDVDFDIAGPSIR, AVGYK GYGFGLIK,VTQSNFAVGK</p>                                                                                                                |                                                                                                                                                                                                                                                                                                                                                                                                                                                                                                                                                                                                                                                                                                                                  |
| IPI00122547.1 | Q60930 | Vdac2  | Voltage-dependent anion-selective channel protein 2                     | <p>SNFAVGYR,GFGFGLVK,LTFDFTT VSGTLETK,GFGFGLVK,LTFDFTFS FSPNTGK,LTLSALVDGK,TGDFQ PNTGK,SCSGVEFSTSGSSNTDTGK LHTNVNNGTEFGGSIYQK,YQLDP ,LTLALVDGK,MAECCVPVCP RPM TASISAK,VNSSLIGVGYTQTLRP CIPPPYADLGK,YQLDPTASISAK,VN GVK NSSLIGVGYTQTLRPGVK</p>                                                                                                                                                                     |                                                                                                                                                                                                                                                                                                                                                                                                                                                                                                                                                                                                                                                                                                                                  |
| IPI00122548.3 | Q5EBQ0 | Vdac3  | Voltage-dependent anion channel 3                                       | <p>AADFQLHTHVNDGTEFGGSIYQK LTLALIDGK,VNNASLIGLGYTQTLR ,LTLALIDGK,VNNASLIGLGYTQT PGVK,LTLDTIFVPNTGK LRPVGVK,LTLDTIFVPNTGK</p>                                                                                                                                                                                                                                                                                      |                                                                                                                                                                                                                                                                                                                                                                                                                                                                                                                                                                                                                                                                                                                                  |
| IPI00227299.6 | P20152 | Vim    | Vimentin                                                                | <p>FADLSEAANR,EEAESTLQSFR,VELQE LNDR,FANYIDK,LLQDSVDFSLADAIN TEFK,DGQVINETSQHDDLE,MALDIEI ATYR,VEVERDNLAEDIMR,VESLQEEI AFLK,EMEENFALEAANYQDTIGR,LHD ILLAELEQLK,KVESLQEEIAFLK,K EEIQELQAQIQEQHVQIDVDVSKPDLT VESLQEEIAFLK,MALDIEIATYR AALR,LQDEIQNMKEEMAR,ILLAELEQ ILLAELEQLK,ISLPLPTFSSLNLR,LL LK,ISLPLPTFSSLNLR,NLQEAEEWYK, EGEEER,KVESLQEEIAFLK,TYSL KVESLQEEIAFLK,SLYSSSPGGAYVTR GSALRPSTSR ,ETNLESPLVDTHSK</p> |                                                                                                                                                                                                                                                                                                                                                                                                                                                                                                                                                                                                                                                                                                                                  |
| IPI00551411.5 | Q8BX70 | Vps13c | Isoform 1 of Vacuolar protein sorting-associated protein 13C            | <p>ISGEIIEVLVVK,IQGLDSSLQSK</p>                                                                                                                                                                                                                                                                                                                                                                                   |                                                                                                                                                                                                                                                                                                                                                                                                                                                                                                                                                                                                                                                                                                                                  |

|               |        |        |                                                        |                                                                                                                                                        |                                                                                                                                                                      |                                                                           |
|---------------|--------|--------|--------------------------------------------------------|--------------------------------------------------------------------------------------------------------------------------------------------------------|----------------------------------------------------------------------------------------------------------------------------------------------------------------------|---------------------------------------------------------------------------|
| IPI00111181.1 | Q9EQH3 | Vps35  | Vacuolar protein sorting-associated protein 35         |                                                                                                                                                        | ACAELHQN NVK, NIIIALIDR, IPVD<br>TYNNILTVLK, LLDEAIQAVK, ILVG<br>TNLVR, LNLEHIATSSAVSK, LSQ<br>IPVDTYNNILTVLK, GVQHPLR<br>EGVNVER, FTLPPLVFAAYQLAFR<br>, VLETTVEIFNK |                                                                           |
| IPI00153207.3 | Q8R0J7 | Vps37b | Vacuolar protein sorting-associated protein 37B        | QSNNASLETLLALLQAEGAK, FLDGEL<br>PLDSFIDVYQSK                                                                                                           |                                                                                                                                                                      |                                                                           |
| IPI00133700.2 | P46467 | Vps4b  | Vacuolar protein sorting-associated protein 4B         | LLEPVVSMWDMRL, LQNQLQGAI<br>PNVK, GILLFGPPGTGK                                                                                                         |                                                                                                                                                                      |                                                                           |
| IPI00132936.1 | Q80X41 | Vrk1   | Isoform 1 of Serine/threonine-protein kinase VRK1      | NPDQVYLV DYGLAYR, RFMIMDRFGS<br>DLQK, LDFSAVENG SVK, ILDILEYIHEH<br>EYVHGDIK, LLEYTEKPLYQNL R, LAEQ<br>FAAGEVLTDM SR, EAEESAVCAVEDM<br>ECSDTQVQEA AQTR |                                                                                                                                                                      |                                                                           |
| IPI00221817.5 | Q99KC8 | Vwa5a  | von Willebrand factor A domain-containing protein 5A   |                                                                                                                                                        | TSAQVSLTEGHK, ELNKPVQGPLA<br>HR                                                                                                                                      |                                                                           |
| IPI00113738.2 | P32921 | Wars   | Isoform 1 of Tryptophanyl-tRNA synthetase, cytoplasmic | DMNQILDAYENK, TLIDVLQPLIAEHQA<br>R                                                                                                                     | ISFPAVQAAPSFNSFPK, HVTFNQV<br>K, PALLHSTFFPALQGAQTK                                                                                                                  |                                                                           |
| IPI00314748.7 | O88342 | Wdr1   | WD repeat-containing protein 1                         |                                                                                                                                                        | VFASLPQVER, VYSILASTLK, V<br>ESK, SIQCLTVHR, FGAVFLWDTGSS<br>VGEITGHNK                                                                                               |                                                                           |
| IPI00121562.1 | Q9JJA4 | Wdr12  | Ribosome biogenesis protein WDR12                      |                                                                                                                                                        | HVEFDLIK, KDSLSCLLLTASMDQT<br>VLLWEWNVEK, WSPTHEQQLISGSL<br>DNIVK, YAVDDVPFSIPAAA EVADLS<br>NIINK                                                                    |                                                                           |
| IPI00623264.2 |        | Wdr17  | WD repeat domain 17                                    |                                                                                                                                                        | GGVCLDTVYDHGADVGLTCHPSR<br>PFTMASC SR, KLMQRR                                                                                                                        |                                                                           |
| IPI00136252.3 | Q4VBE8 | Wdr18  | WD repeat-containing protein 18                        |                                                                                                                                                        | LQLGLHLQ GK, GPVTNAAIILAPPSM<br>LNPEFRPSLPLPHFNK                                                                                                                     |                                                                           |
| IPI00226275.2 | Q8C6G8 | Wdr26  | WD repeat-containing protein 26                        | LALLNVATQGVHLWDLQDR, YLEYLED<br>GKVLEALQVLR                                                                                                            |                                                                                                                                                                      |                                                                           |
| IPI00876121.1 | Q3TAQ9 | Wdr36  | WD repeat domain 36 isoform 1                          |                                                                                                                                                        | LINQMR, SLGHGLV NK, VLIHSLGLD<br>SSPNMMLLHR                                                                                                                          |                                                                           |
| IPI00849919.1 |        | Wdr43  | WD repeat domain 43 isoform 5                          |                                                                                                                                                        | LGSTEATIEER, LILLVTQVTASEK,<br>DQADLLALGTAVGSILLYSTVR, LL<br>NVWQVR, LWVLETK                                                                                         | KMTSPGQK, VVILLQELTK, LLNVW<br>QVR, HFTGHATPVSSLR, VLVP<br>GIPG<br>HHAPIK |
| IPI00129141.1 | Q9Z0H1 | Wdr46  | WD repeat-containing protein 46                        | ILQTDIVEAVDIASAAK, AELL<br>LVGEDGEDTAK, GLLVAGMGDVVNIW<br>AGQ GK, DIHFLHSEALLAVAQNR, AVAV<br>DSTGTYMATSGLDHQLK, TL<br>FPGVPAPLEEAR                     | ILQTDIVEAVDIASAAK, ALAEVDV<br>VTLEQQK                                                                                                                                |                                                                           |
| IPI00139957.1 | P61965 | Wdr5   | WD repeat-containing protein 5                         | TLIDDDNPPVSFVK, TLP<br>HFNR                                                                                                                            |                                                                                                                                                                      |                                                                           |
| IPI00117632.2 | Q3TEZ2 | Wdr6   | Putative uncharacterized protein                       |                                                                                                                                                        | QAWVVTGGDDSGIR, YMSLAICELD<br>NDRPGLGPGPLVAAACSDGAVR, L<br>HIVNCGGGHR, ELTIVAGAVSNELLI<br>WYPATALTDNK                                                                |                                                                           |

|               |        |         |                                                                            |                                                                                                                                                                               |                                                                                                                                                                                                                                                                                                                                                                                                                                     |
|---------------|--------|---------|----------------------------------------------------------------------------|-------------------------------------------------------------------------------------------------------------------------------------------------------------------------------|-------------------------------------------------------------------------------------------------------------------------------------------------------------------------------------------------------------------------------------------------------------------------------------------------------------------------------------------------------------------------------------------------------------------------------------|
| IPI00112320.4 | Q9ERF3 | Wdr61   | WD repeat-containing protein 61                                            |                                                                                                                                                                               | ENIETVVTGSLDDLVK,YLASGAIDGI<br>INIFDIATGK                                                                                                                                                                                                                                                                                                                                                                                           |
| IPI00122120.1 | Q8VCG3 | Wdr74   | WD repeat-containing protein 74                                            | VWDLQGSEEPVFR,YFNAEEGTFLSQ<br>R,VPIWDQDTQFLPGSQK                                                                                                                              |                                                                                                                                                                                                                                                                                                                                                                                                                                     |
| IPI00114819.3 | Q99J09 | Wdr77   | Methylosome protein 50                                                     |                                                                                                                                                                               | NASCTLSSAVHSQGVTR,AHAGQV<br>TCVAASPHK                                                                                                                                                                                                                                                                                                                                                                                               |
| IPI00132977.1 | Q9D0R9 | Wdr89   | WD repeat-containing protein 89                                            | VDEDALLVFDAR,DPLGAYSETHSD<br>DITQVR                                                                                                                                           |                                                                                                                                                                                                                                                                                                                                                                                                                                     |
| IPI00229685.2 | Q8CHP5 | Wibg    | Isoform 1 of Partner of Y14 and mago                                       | PELPPGLSPEATTPVTPSRPEGGETG<br>LSK,EGYVPQEEVPVYENK,RVLEEEL<br>EDLELGL,SKPELPPGLSPEATTPVTPS<br>RPEGGETGLSK,IQAGEVSQPSR,VLE<br>EELEDLELGL,VSLGDTAQIPSALQGP<br>QATPLAASDPSSAATTEK |                                                                                                                                                                                                                                                                                                                                                                                                                                     |
| IPI00120744.1 | Q9DCD2 | Xab2    | Pre-mRNA-splicing factor SYF1                                              | LEQQSVPAAVFGSLKED,LEQQSVPA<br>VFGSLK,RPLLLNSVLLR,LSPEAAEYI<br>EYLK,VSGSATGTVSDLAPGQSGMDD<br>MK,VQSLNVDIIR                                                                     |                                                                                                                                                                                                                                                                                                                                                                                                                                     |
| IPI00170021.1 | Q8K2X7 | Xpa     | Xpa protein                                                                | QTSPEPVAADEPAQLPAAVR,ALEVW<br>GSQEALEDAK                                                                                                                                      |                                                                                                                                                                                                                                                                                                                                                                                                                                     |
| IPI00420231.4 | Q3UE92 | Xpnpep1 | X-prolyl aminopeptidase<br>(Aminopeptidase P) 1, soluble, isoform<br>CRA_b |                                                                                                                                                                               | DAVALCELFNWLEQEVPK,GSLTF<br>EPLTLVPIQTK,IENVLVVPAK<br>MIDVNALTDK,VGVDPLIPTDYWK,G<br>SLTFEPLTLVPIQTK,SAGHHLVPVK                                                                                                                                                                                                                                                                                                                      |
| IPI00395038.3 | Q6P5F9 | Xpo1    | Exportin-1                                                                 |                                                                                                                                                                               | SNDPQMVAENFVPLLDVAVLIDY<br>QR,LISTLIYK,AIIASNIMYIVGQYP<br>R,EPEVLSTMAIIVNK,YVVGLIIL,L<br>FVTGLFSLNQDIPAFK,MAQEVLT<br>HLK,YMLLPNQVWDSIIQQATK,FL<br>VTVIK,LNMILVQILK,YYGLQILENV<br>IK,FLNWIPLGYIFETK,LVLDSIIWA<br>FK,LDINLLDNVNCLYHGEGAQQ<br>R,DFLVQIK,LLSEEVDFSSGQIT<br>QVK,AVGHPPFVIQLGR<br>YYGLQILENVIK,LISGWVSR,ESPFS<br>TSASPLLSGSQHFIPPR,LDINLLD<br>NVVNCLYHGEGAQQR,YMLLPNQV<br>WDSIIQQATK,MAQEVLTHLK,FLVT<br>VIK,AVGHPPFVIQLGR |
| IPI00321154.4 | P27641 | Xrcc5   | ATP-dependent DNA helicase 2 subunit<br>2                                  |                                                                                                                                                                               | DDEAAVALSSLVHALDELNMVAI<br>VR,SGISLQFFLPFPIDK                                                                                                                                                                                                                                                                                                                                                                                       |
| IPI00132424.4 | P23475 | Xrcc6   | ATP-dependent DNA helicase 2 subunit<br>1                                  | NIYVLQDLNDNPGAK,ADEFK,KQELLD<br>LIR,DLLAVVFGTEK,ELVYPPGYNPE<br>GK,SDSFENPVLQQHFR,DTGIFLDM<br>HLK,DSLIFLVDSR,KPGGFDVSVFYR,<br>TFNVNTGSLLLPSDTK                                 | IISDRDLLAVVFGTEK,DSLIFLV<br>DASR                                                                                                                                                                                                                                                                                                                                                                                                    |
| IPI00120046.1 | Q9DBR1 | Xrn2    | Isoform 1 of 5'-3' exoribonuclease 2                                       | NLTVILSDASAPGEGEHK,AALEEVYP<br>DLTPEENR,LLYMAIDGVAPR,AALEEV<br>YDILTPEENRR                                                                                                    |                                                                                                                                                                                                                                                                                                                                                                                                                                     |
| IPI00108989.4 | Q91WL1 | Yap1    | Yes-associated protein 1, isoform<br>CRA_d                                 | LDKESFTWL,KLPDSFFKPPEPK,SQL<br>PTLEQDGGTPNAVSSPGMSQELR,YF<br>LNHNDQTTTWQDPR                                                                                                   |                                                                                                                                                                                                                                                                                                                                                                                                                                     |

|               |          |        |                                              |                                                                             |                                                                                                                                                                                                                                                    |
|---------------|----------|--------|----------------------------------------------|-----------------------------------------------------------------------------|----------------------------------------------------------------------------------------------------------------------------------------------------------------------------------------------------------------------------------------------------|
| IPI00314153.4 | A2A7S7   | Yars   | Tyrosyl-tRNA synthetase                      | LKKAFCEPGNVENNGVLSFIK,AGCEV<br>TILFADLHAYLDNMK,QVEHPLLSGLLY<br>PGLQALDEEYLK | TVVSGLVQFVPK,HVLFPLK,QVEHP<br>LLSGLLYPGLQALDEEYLK,LHLITR,<br>KLASAAYPDPSK                                                                                                                                                                          |
| IPI00896734.1 | B2RUF0   | Ybx2   | Y box protein 2                              | EDVFNHQTAK,SVGDGETVEFDVVEG<br>EK,NDTKEDVFVHQTAK                             |                                                                                                                                                                                                                                                    |
| IPI00621973.3 |          | Ylpm1  | YLP motif containing 1                       | AIGFVVGQTDWEK,MPLPAPALGHQP<br>PPVPR                                         |                                                                                                                                                                                                                                                    |
| IPI00752810.1 | A2AWN8   | Ythdf1 | YTH domain family 1, isoform CRA_a           | NAAFQQSGGANSDSNSVGNAPTSA<br>PSVESHVLEK,HTTSIFDDFSHYEK,S<br>GPIVGGALPPPIK    |                                                                                                                                                                                                                                                    |
| IPI00314865.9 | Q3UNH5   | Ythdf2 | Putative uncharacterized protein             | APGMNTIDQGMAALK,HTTSIFDDFSH<br>YEK                                          |                                                                                                                                                                                                                                                    |
| IPI00227149.4 | Q8BYK6-3 | Ythdf3 | Isoform 3 of YTH domain family protein 3     | GPLYLLFSVNGSGHFCGVAEMK,VPGI<br>SSIEQGMTGLK,GNVIGGSAVPPPI<br>K               |                                                                                                                                                                                                                                                    |
| IPI00230682.6 | Q9CQV8   | Ywhab  | Isoform Long of 14-3-3 protein<br>beta/alpha | DSTLIMQLLR                                                                  | TAFDEAIAELDTLNEESYKDSTLI<br>MQLLR,NLLSVAYK,DSTLIMQLLR<br>,AVTEQGHLSNEER,KEMQPTH<br>PIR,IEAELQDICNDVLELLDK,EKIE<br>AELQDICNDVLELLDK,VISSIEQK,<br>YLILNATQAESK,LAEQAEK,YLSE<br>VASGENK,TAFDEAIAELDTLNEE<br>SYK                                       |
| IPI00118384.1 | P62259   | Ywhae  | 14-3-3 protein epsilon                       | DSTLIMQLLR                                                                  | HLIPAANTGESK,AAFDDAIAELDT<br>LSEESYKDSTLIMQLLR,EAAENS<br>LVAYK,AAFDDAIAELDTLSEESYK<br>,DSTLIMQLLR,VAGMDVELTVEE<br>R,IISSIEQK,LAEQAEK,EALQDVE<br>DENQ,LICCDILDVLDK,YLAEFAT<br>GNDR,NLLSVAYK,KEAAENSLVA<br>YKAASDIAMTELPPTHPIR,AASDI<br>AMTELPPTHPIR |
| IPI00230707.6 | P61982   | Ywhag  | 14-3-3 protein gamma                         | DSTLIMQLLR,NVTELNEPLSNEER                                                   | EHMQPTHPIR,YLAEVATGEK,NLL<br>SVAYK,DSTLIMQLLR,NVTELNEP<br>LSNEER,TAFDDAIAELDTLNEDS<br>YK,ELEAVCQDVLSDLDNYLIK,AY<br>SEAHEISK,VISSIEQK,TAFDDAIA<br>ELDTLNEDSYKDSTLIMQLLR,LAE<br>QAER,LGLALNYSVFYIEIQNAPE<br>QACHLAK                                  |
| IPI00227392.5 | P68510   | Ywhah  | 14-3-3 protein eta                           | DSTLIMQLLR                                                                  | EHMQPTHPIR,VLALLDK,NLLSVA<br>YK,DSTLIMQLLR,AVTELNEPLSN<br>EDR,YLAEVASGEK,VISSIEQK,EL<br>ETVCNDVLALLDK,NSVVEASEAA<br>YK,LAEQAEK                                                                                                                     |

|               |        |         |                                                            |                                                                                                                                                                                                                                                               |                                                                                                                                                                                                                                                                                                                                                                                  |
|---------------|--------|---------|------------------------------------------------------------|---------------------------------------------------------------------------------------------------------------------------------------------------------------------------------------------------------------------------------------------------------------|----------------------------------------------------------------------------------------------------------------------------------------------------------------------------------------------------------------------------------------------------------------------------------------------------------------------------------------------------------------------------------|
| IPI00853924.1 |        | Ywhaq   | 34 kDa protein                                             | QTIENSQGAYQEA<br>FDISK,DSTLIMQLL<br>R                                                                                                                                                                                                                         | YLIANATNPESK,YLAEVACGDDR, YLIANATNPESK,QTIENSQGAYQEA<br>AVTEQGAELSNEER,TAFDEAIAE FDISK,YLAEVACGDDR,NLLSVAYK,<br>LDTLNEDSYK,NLLSVAYK,TAFDE TAFDEAIAELDTLNEDSYK,AVTEQG<br>AIAELDTLNEDSYKDSTLIMQLLR, AELSNEER,SICTTVLELLDK,DSTLI<br>DSTLIMQLLR,SICTTVLELLDK,KE MQLLR,SICTTVLELLDKYLIANATNP<br>MQPTHPIR,VISSIEQK,KQTIENSQ ESK,VISSIEQK,EMQPTHPIR,LAEQ<br>GAYQEA<br>FDISK,LAEQAER AER |
| IPI00116498.1 | P63101 | Ywhaz   | 14-3-3 protein zeta/delta                                  | DSTLIMQLLR                                                                                                                                                                                                                                                    | SVTEQGAELSNEER,FLIPNASQP SVTEQGAELSNEER,FLIPNASQPE<br>ESK,NLLSVAYK,EKIE TELR,YLAE SK,NLLSVAYK,DSTLIMQLLR,YLAE<br>VAAGDDKK,DSTLIMQLLR,KEMQ VAAGDDK,TAFDEAIAELDTLSEESY<br>PTHPIR,TAFDEAIAELDTLSEESY K,EMQPTHPIR,GIVDQSQQAYQEA<br>K,GIVDQSQQAYQEA<br>FEISK,DICN EISK,DICNDVLSLLEK,LAEQAER,V<br>DVLSLLEK,TAFDEAIAELDTLSEE SYKDSTLIMQLLR,LAEQAER VSSIEQK                              |
| IPI00421162.4 | Q6NZF1 | Zc3h11a | Zinc finger CCCH domain-containing protein 11A             | QEGSSGVSSVLQQPQPNPGPEK,G<br>EVETSGIGDSILNVK,LSSASTGKPPLS<br>VEDDFEK,AAVAVVPLLSEDK,TLEEILL<br>ER,DSSVLSSAQAASEPLLPEGSGPSS<br>SQTATKPR                                                                                                                          |                                                                                                                                                                                                                                                                                                                                                                                  |
| IPI00515528.2 |        | Zc3h13  | RIKEN cDNA 3110050K21                                      | EELADISTDKDGVLEDPLKK,DLGSVQ<br>GFEDVSK                                                                                                                                                                                                                        |                                                                                                                                                                                                                                                                                                                                                                                  |
| IPI00461416.4 | Q8BJ05 | Zc3h14  | Isoform 1 of Zinc finger CCCH domain-containing protein 14 | LQELGAYVDEELPDYIMVMVANKK,QL<br>EDPDGFSFNAEMTDLSVAQKPEK,TS<br>QEELLAEMVQGQNR                                                                                                                                                                                   |                                                                                                                                                                                                                                                                                                                                                                                  |
| IPI00223503.1 | Q8BPK2 | Zcchc3  | zinc finger, CCHC domain containing 3                      | AVHNSVTAQLTSVAGH,SIGMDPDDIY<br>AVIQIPGSR,PGTTEDATERPLQDEPP<br>AAGPGK                                                                                                                                                                                          |                                                                                                                                                                                                                                                                                                                                                                                  |
| IPI00458460.1 | O88466 | Zfp106  | Isoform 1 of Zinc finger protein 106                       | APVYSFFTGEGETGK,SDTLEKPLFNFS<br>LITAGLR                                                                                                                                                                                                                       |                                                                                                                                                                                                                                                                                                                                                                                  |
| IPI00387481.3 |        | Zfp185  | zinc finger protein 185 isoform a                          | SSISGTEEEVPFTPDEQK,TTSSPTQ<br>ELQSPFLAK,RVDVDEDLVPEK,PMG<br>DLLDQIFIHR,CGICNKPMGDLLDQIFIH<br>R                                                                                                                                                                |                                                                                                                                                                                                                                                                                                                                                                                  |
| IPI00125510.1 | Q9JMD0 | Zfp207  | zinc finger protein 207 isoform 1                          |                                                                                                                                                                                                                                                               | PATLTTTSATSK,NLPRPGQTPIGNP<br>PVGPIGGMPPQGPLPQQQAMR,I<br>LIHQK                                                                                                                                                                                                                                                                                                                   |
| IPI00469594.3 | Q6IQX8 | Zfp219  | zinc finger protein 219                                    | SYGGFRPLPSALPNR,APSGETPPSPP<br>LEEEGSPGLSR,LLLELEER,EANPAPT<br>PAPPEPPAPPEFR,PLAATSTPEPPP<br>PPQQEPR,GGEAEPLDLSLR,SLGSLT<br>SLHPNPGEGSGQPAPAAGTQAR,FNS<br>ILALHLR,STATQEENGLLVGGTR,ILVG<br>HLEPSPPAFDGLDLQR,REPPSLLGY<br>LSVR,PTQASATWVEGTASTRPPSSST<br>GPGSR | AGPGGEAGAGGALHR,SSAGPGPP<br>PEPPPPSQR                                                                                                                                                                                                                                                                                                                                            |

|               |        |         |                                                          |                                                                                                                                                |                                                                         |
|---------------|--------|---------|----------------------------------------------------------|------------------------------------------------------------------------------------------------------------------------------------------------|-------------------------------------------------------------------------|
| IPI00124803.1 | Q62384 | Zfp259  | Zinc finger protein ZPR1                                 | TFDQNEELGLNDMK,GALTTVEGLISR,<br>FTTLEGLLK,IPELDIFEIPAFSQK                                                                                      |                                                                         |
| IPI00116926.4 | Q99LI5 | Zfp281  | zinc finger protein 281                                  | TTYQIENFAQAFGSQFK,SGIPDEVLQS<br>ILDQYSGK,SYLNFVSPLPDVVGQK,VD<br>LHTSGEHSSELVQEENLSPGTQTPSND<br>K,TSWGFLQSLVSIK,PFQCSQCSMGFI<br>QKYLLQR         |                                                                         |
| IPI00282808.7 | B0V2M3 | Zfp318  | zinc finger protein 318 isoform 1                        | VAQILGIDIFDK,AEGLEQQTDFLLPHE<br>R                                                                                                              |                                                                         |
| IPI00411014.1 | Q6NXK2 | Zfp532  | Isoform 1 of Zinc finger protein 532                     | TVHLANLNLLPQGAQATSELR,QVTIKP<br>VATAFLPVSAVK,PVATAFLPVSAVK,Q<br>NAHVDDDSHTPSSSDVGVSVIVK,EAE<br>SNSITLSVYEPFK,KPSEQAASVMASV<br>TSLSSASATVLSSPPR |                                                                         |
| IPI00112984.4 | Q6P9P9 | Zfp655  | Zinc finger protein 655                                  | EQDLQVFDLESK,EVIRGDCSDGETRE<br>ENK,SFSLDSTLDTDQR                                                                                               |                                                                         |
| IPI00320645.1 | Q8R1N0 | Zfp830  | Zinc finger protein 830                                  | ETTSNVLNPNDFNTNPPK,SELLWQTH<br>VLGK,LGQLSCALCNTPVK,ASAGPQV<br>QPSTSASSANLDAAR                                                                  |                                                                         |
| IPI00377729.3 | Q80U44 | Zfyve16 | Zinc finger FYVE domain-containing protein 16            |                                                                                                                                                | DQDISILSSSYQFAK,EQCLSNSNTM<br>SAGENVNDSQLQMNQITMK,LLCSV<br>AK,LPCCELLK  |
| IPI00119998.6 | Q9DAZ9 | Zfyve19 | Zinc finger FYVE domain-containing protein 19            | VTLQDYHLPDSDEDEETAQR,LLAEA<br>AVELQEENTR,LAALKDEVQGPISTQ<br>EMEDR                                                                              |                                                                         |
| IPI00755765.1 | Q1WG82 | Zglp1   | GATA-like protein 1                                      |                                                                                                                                                | GTQCPNLEISSATSPASLQRR,QELL<br>APPCLDTESLR,RQELLAPPCLDTE<br>SLRK         |
| IPI00132099.1 | Q9CPW7 | Zmat2   | Zinc finger matrin-type protein 2                        | DGKPVQPVKR,RAEEDLTFEEDDEMA<br>AVMGFSGFGSTK                                                                                                     |                                                                         |
| IPI00354840.5 | Q8CIE2 | Zmiz2   | Isoform 1 of Zinc finger MIZ domain-containing protein 2 |                                                                                                                                                | NTIQITVTACCCSHLFLVLQVHRPSV<br>R,PSTDFTQAAAAAAMAAAAATATA<br>TATATVAALQEK |
| IPI00896685.1 | B2RW16 | Znhit6  | MCG7779, isoform CRA_c                                   | LQFPQSQAIEYIEK,TINEILKPYIDPEES<br>DPVIR,QEADSSLVKEEEVDEPEVK                                                                                    |                                                                         |
| IPI00756815.2 |        | Zscan10 | zinc finger and SCAN domains 10                          | DKDHLSSDPGSLSSSQESNPYVCS<br>CGK,LAPSSNWPMSPPEQILQDPR,D<br>ISHMGPLDFFSAGK,DGEEVVQLLEG<br>VPR                                                    |                                                                         |
| IPI00228360.3 | Q62523 | Zyx     | Zyxin                                                    | VCSIDLEIDSLSLDDMTK,VNPFPRG<br>DSEPPVAAGAQR                                                                                                     |                                                                         |
| IPI00889986.1 | P49312 | Hnrnpa1 | Heterogeneous nuclear ribonucleoprotein A1               | EDSQRPGAHLTVK,GFGFVTYATVEEV<br>DAAMNAR,RGFAFVTFDDHDSVDK,IE<br>VIEIMTDR,GFAFVTFDDHDSVDK,LFIG<br>GLSFETTDQSLR,EDTEEHHLR                          |                                                                         |

---

|               |        |        |                                  |                                                                                                                                   |
|---------------|--------|--------|----------------------------------|-----------------------------------------------------------------------------------------------------------------------------------|
| IPI00886422.1 | P84228 | Hist1h | Histone H3.2                     | YRPGTVALR,FQSAAGALQASEA<br>YLVGLFEDTNLCAIHAKR,EIAQDF<br>K,RVTIMPK,STELLIR,KLPFQR                                                  |
| IPI00889281.1 | B0LM42 | Rbm14  | Transcriptional coactivator CoAZ | RMHVQLSTSR,ATGPVLTVGEGYGYG<br>HDSELSQASAAAR                                                                                       |
| IPI00876172.1 | P62751 | Rpl23a | 60S ribosomal protein L23a       | LDHYAIKFPLTTESAMK,NKLDHYAIK<br>FPLTTESAMK,KIEDNNTLVFIVDVK,IE<br>DNNTLVFIVDVK,LALDYDALDVANK,L<br>DHYAIK,VNTLIRPDGEK,FPLTTESAM<br>K |

---



**Figure s1.** 1DE gel images of the fractions from the subcellular enrichment. Each gel was cut into 5 pieces and digested and analyzed via MS separately. Data from all 5 slices were merged into a single database search per gel.

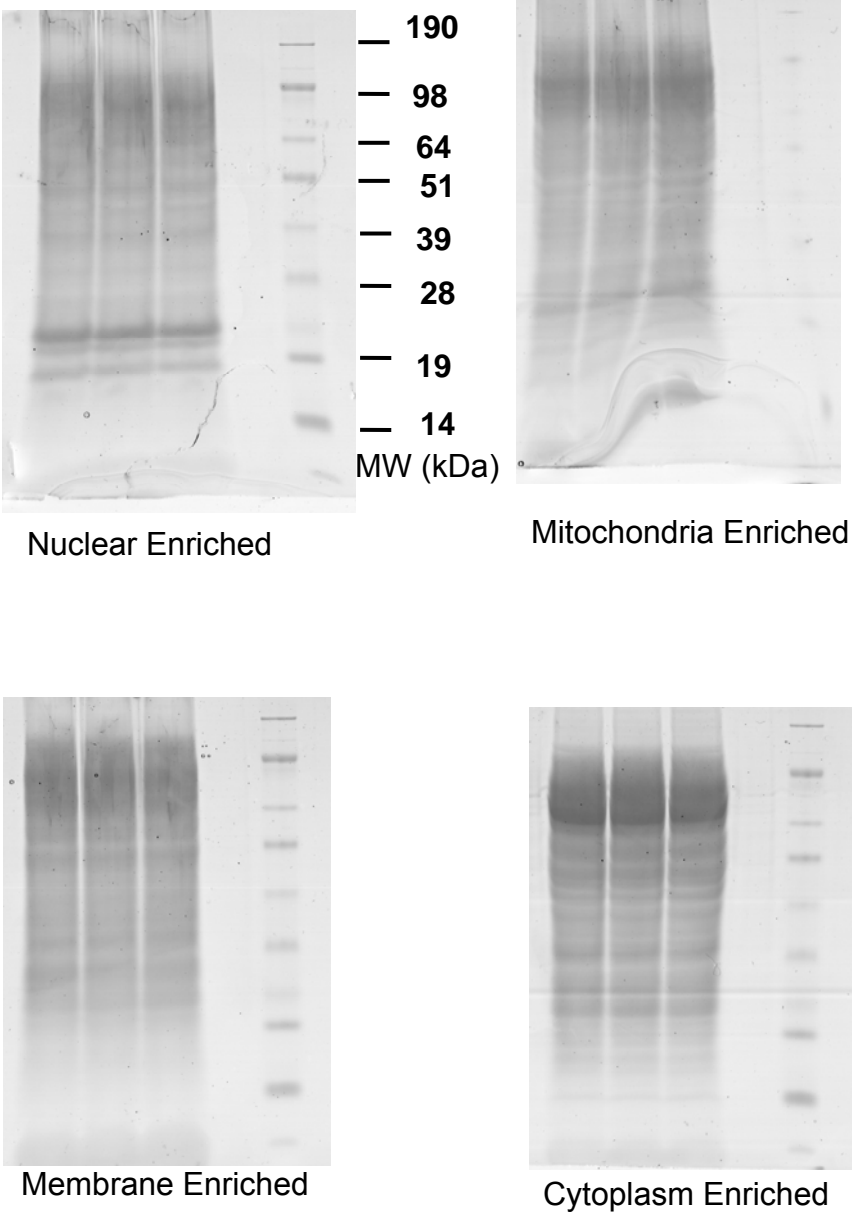

# Figure s2

Sequence coverage observed vs. protein length among the three proteomic approaches

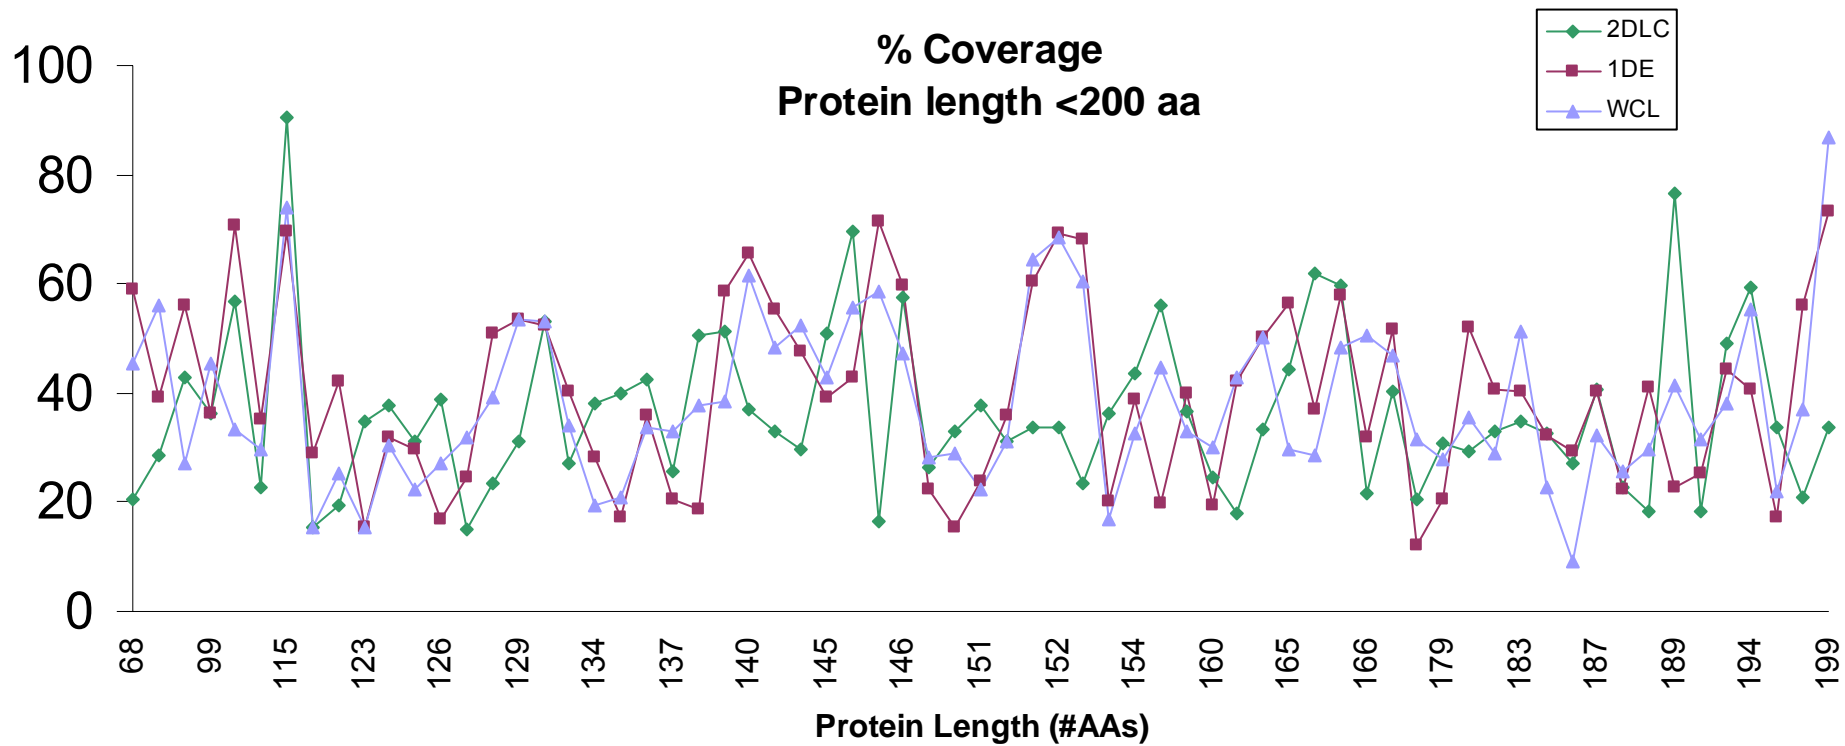

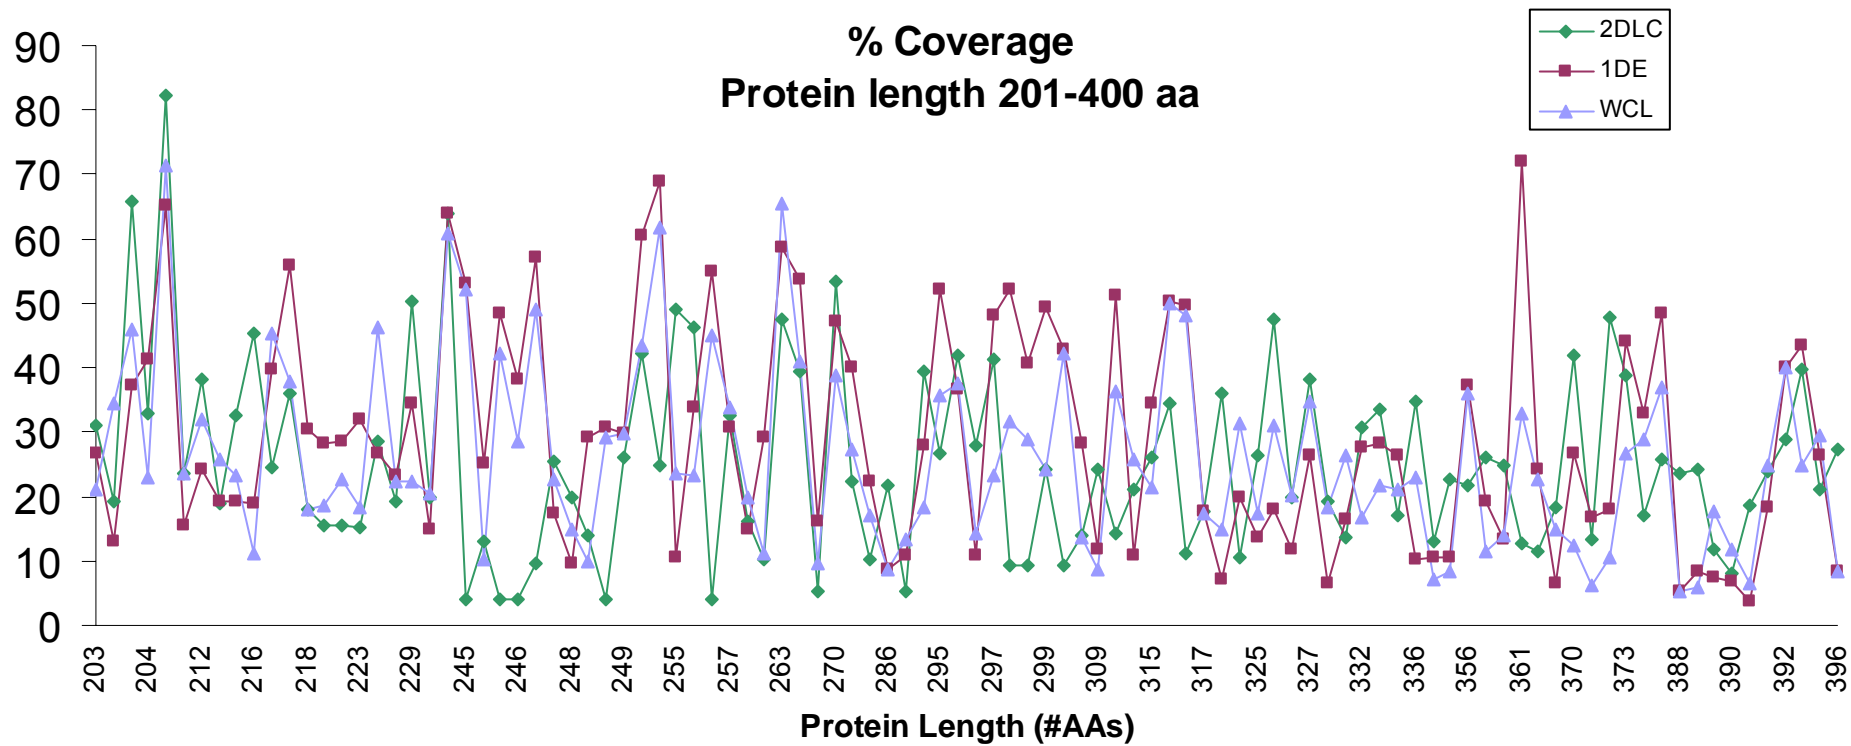

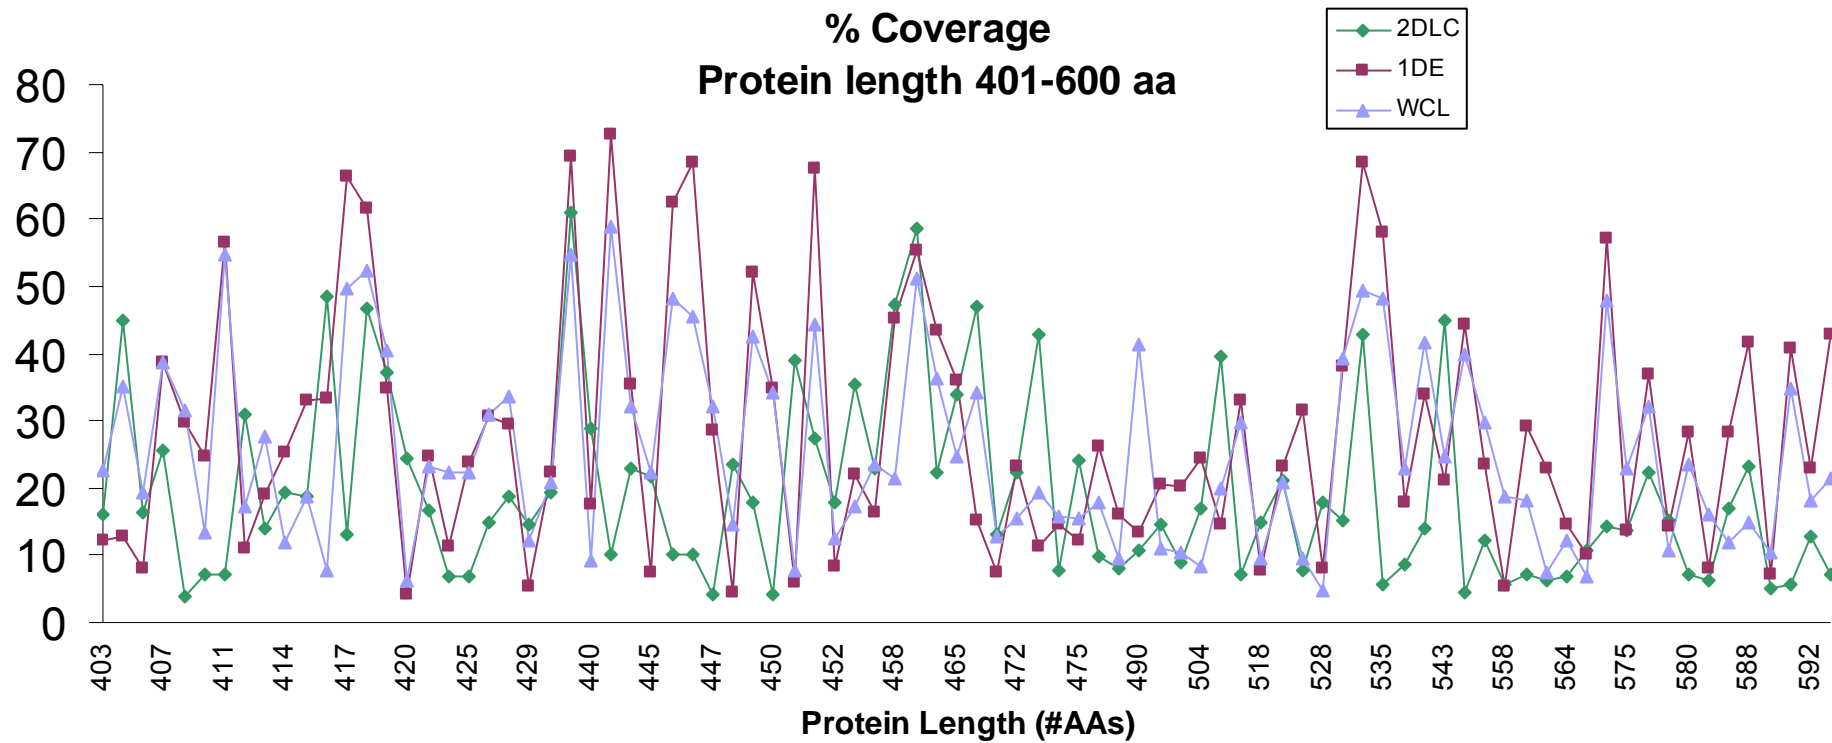

**% Coverage**  
**Protein length 601-800 aa**

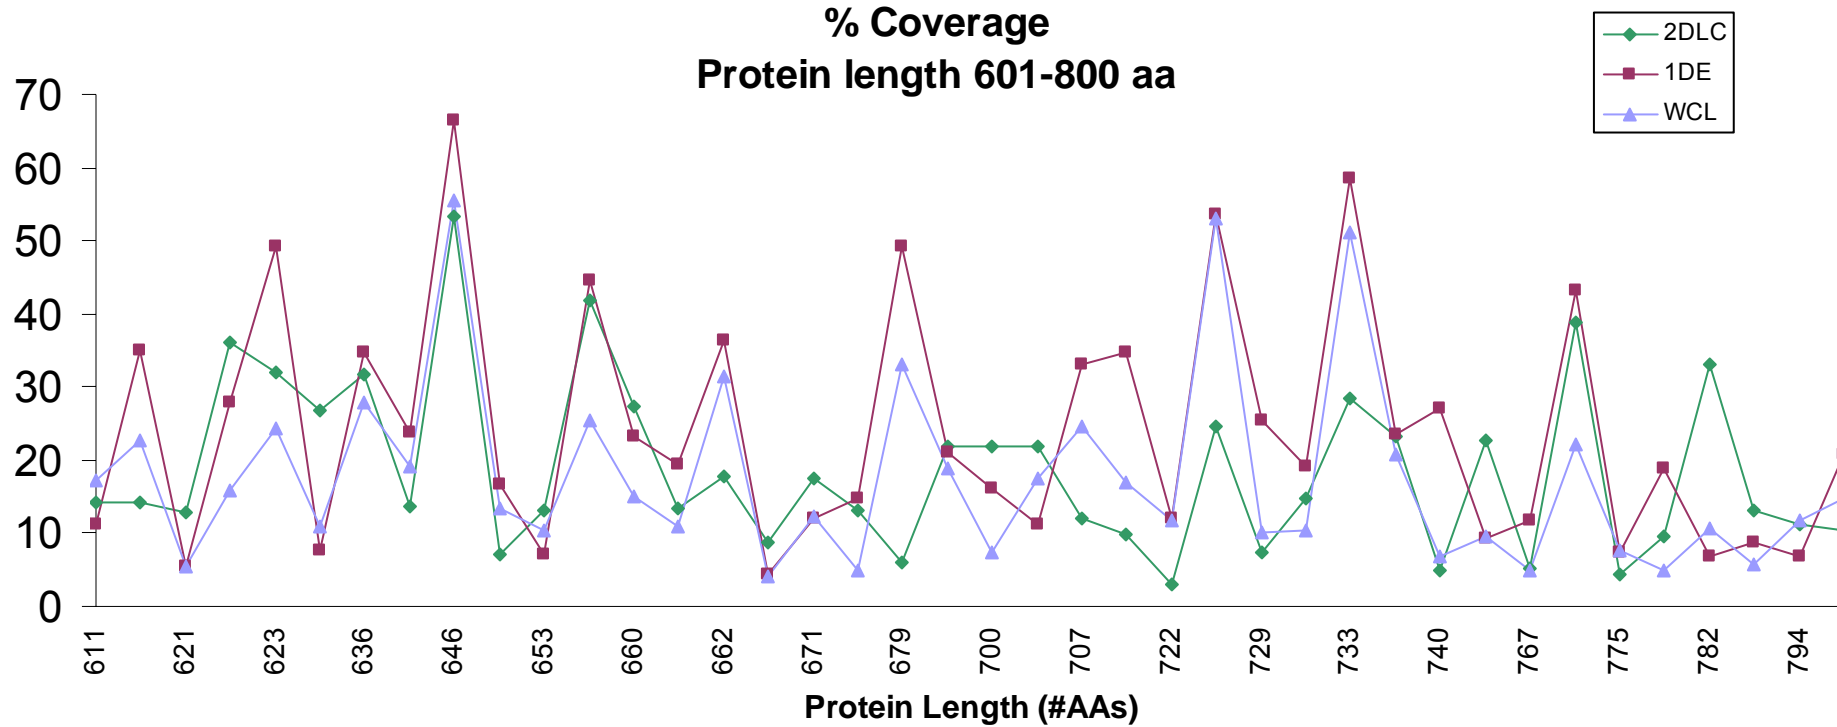

### % Coverage Protein length >801 aa

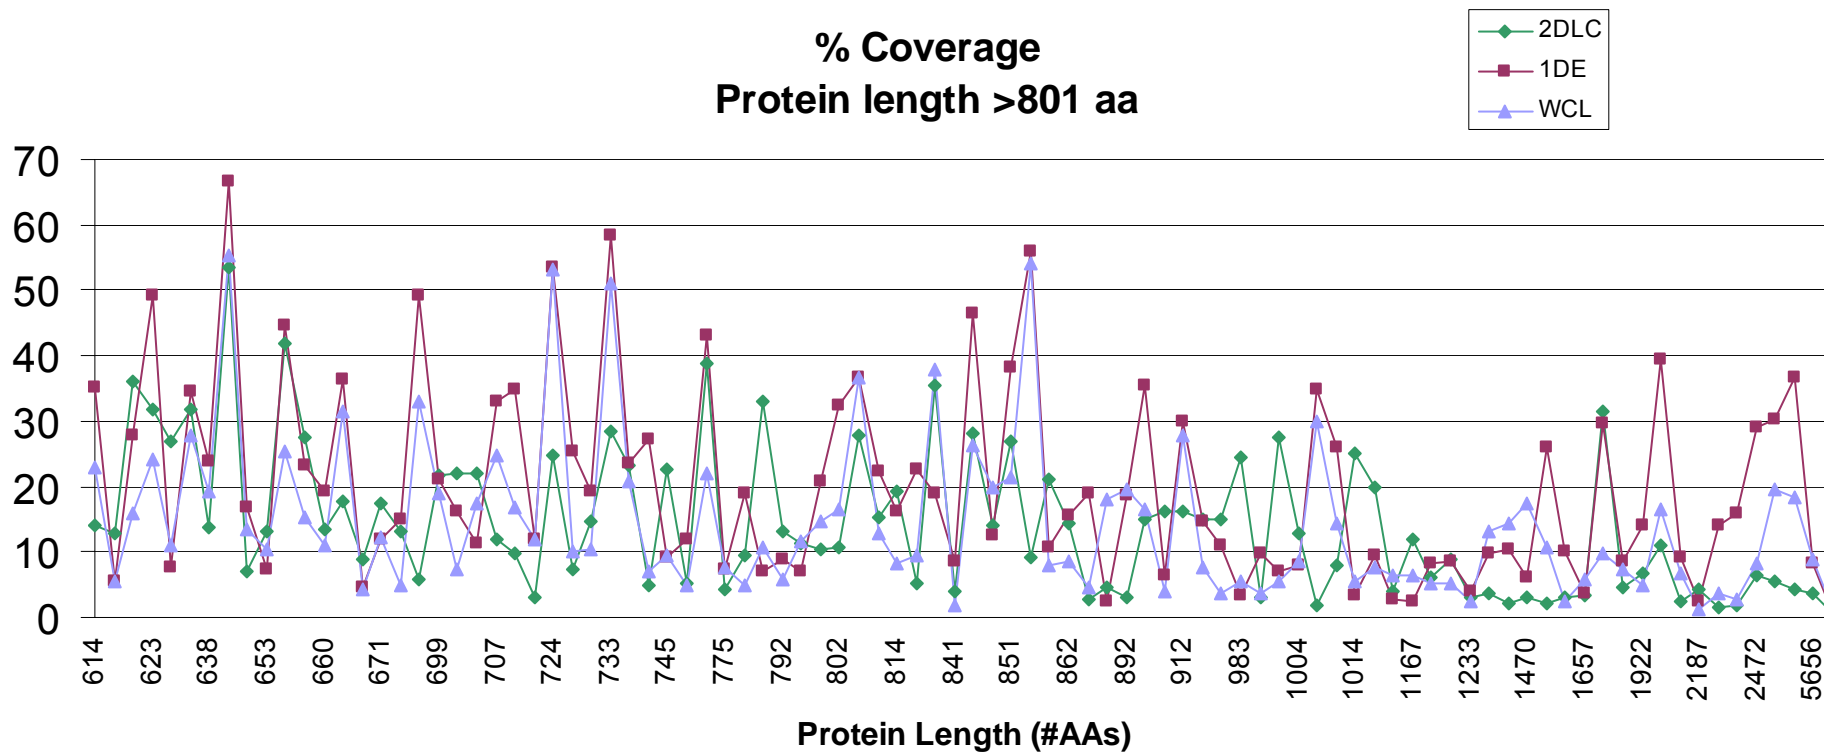

Supplement: NIHMS152485-supplement-supplemental_data.pdf [file NIHMS152485-supplement-supplemental_data.pdf]
